# Supplementary material for: U2af1S34F and U2af1Q157R myeloid neoplasm-associated hotspot mutations induce distinct hematopoietic phenotypes in mice
Source: Leukemia. 2026 May 6;40(7):1467–81. doi: 10.1038/s41375-026-02974-7 (PMC13276503; doi:10.1038/s41375-026-02974-7)
Supplement: Supplementary file 1 — Table S1 List of primers [file 41375_2026_2974_MOESM1_ESM.xlsx]

## Sheet: List of primers
Gene symbol	Species	Forward primer	Reverese primer	Size in bp	Purpose	PMID or other reference
U2af1	Mouse	AGACCTGCTTGCTTCAGAGCAG	GTGCTGCAGGGGCACTGTTC	212 / 155	Genotyping U2af1-S34F (MG-S34F)	30322915
U2af1	Mouse	GCACATGAGCAAGCTCTTGATCAC	GCTGAGATCTTAAATGCCCACAGC	300 / 235	Genotyping U2af1-Q157R (MG-Q157R)	This study
U2af1	Mouse	GAGGGTGATGGACCTACCCA	GAGAAGAAAGGGGCGGCAAA	295 / 112	Genotyping U2af1-flox	34546980
Cre	NA	CTGGGGATTGCTTATAACACCC	TCATCAGCTACACCAGAGACGG	200	Genotyping Mx1-Cre	JAX
Il2	Mouse	AGATGCCAGGACATCAGGAACCTG	ATCAGCCACACCAGACACAGAGATC	324	Genotyping Mx1-Cre (internal control amplicon)	JAX
U2af1	Mouse	cactctttccctacacgacgctcttccgatct GGAGCATGTCGTCATGGAGAC	gtgactggagttcagacgtgtgctcttccgatct TACACGTTCCCCACCAGGTG	269 (335 with tails)	cDNA amplicon sequencing (MG-S34F)	This study
U2af1	Mouse	cactctttccctacacgacgctcttccgatct TTAGCCAGACCATTGCCCTCTTG	gtgactggagttcagacgtgtgctcttccgatct ATGCATGAAGTTGCAGAAGC	395 (461 with tails)	cDNA amplicon sequencing (MG-Q157R)	This study
NA	NA	aatgatacggcgaccaccgagatctacacNNNNNN aCACTCTTTCCCTACACGACGCTCTTC	caagcagaagacggcatacgagatNNNNNNNN GTGACTGGAGTTCAGACGTGTGCTC	.	i5 (6-mer) and i7 (8-mer) indexing of cDNA amplicons	This study
H2AFY	Human	CAGTCCTCTCCACCAAGAGCC	CACCTTTCTTCTCCAGCGTGTT	153 / 162	Splicing event_RT-PCR	25965570
H2afy	Mouse	CTGTCCTCTCCACCAAGAGCC	CGCCCTTCTTCTCCAGTGTGTT	153 / 162	Splicing event_RT-PCR	This study
GNAS	Human	AAGCACCATTGTGAAGCAGA	TTCAATCGCCTCTTTCAGGT	154 / 109	Splicing event_RT-PCR	34620690
Gnas	Mouse	GCTGGAGAGTCTGGCAAAAG	GGCCTCCTTCAGGTTGTTTT	165 / 120	Splicing event_RT-PCR	This study
MPHOSPH9	Human	TGGAAGAGTTTGACTTGGTGAA	CCGAATCAGTCTTTCCACTG	237 / 193	Splicing event_RT-PCR	This study
Mphosph9	Mouse	ATTAAAAGCGCTCCCCAATC	CGGCCACTGTTCTGTAGGTC	170 / 126	Splicing event_RT-PCR	This study
SETD5	Human	TGGAGGCTAGTCCAGCAGTT	CTTCAGAGTTCGGGCTGTCT	231 / 174	Splicing event_RT-PCR	This study
Setd5	Mouse	TGGAGGCTAGTCCAGCAGTT	GCCATCCTGAGAAAGACCAC	278 / 221	Splicing event_RT-PCR	This study
ATP6V0A1	Human	CTTCCTGGAACTGACCGAAT	TTAATGACACCAGCCACGAA	186 / 165	Splicing event_RT-PCR	This study
Atp6v0a1	Mouse	AACCCAGCAGTTTTTCGATG	GGGTTTTCGATTTCAGCTTG	234 / 213	Splicing event_RT-PCR	This study
CLIP1	Human	CCGGGTTGAAGAAGAATCAA	GCTCCAAAATGCTCCTTCAG	375 / 270	Splicing event_RT-PCR	This study
Clip1	Mouse	CCGAGTTGAAGAAGAATCAA	GCTCCGAAGTGTTCCTTCAA	375 / 270	Splicing event_RT-PCR	This study
