# Supplementary material for: U2af1S34F and U2af1Q157R myeloid neoplasm-associated hotspot mutations induce distinct hematopoietic phenotypes in mice
Source: Leukemia. 2026 May 6;40(7):1467–81. doi: 10.1038/s41375-026-02974-7 (PMC13276503; doi:10.1038/s41375-026-02974-7)
Supplement: Supplementary file 2 — Table S2 Clinical characteristics of MDS and s-AML patients [file 41375_2026_2974_MOESM2_ESM.xlsx]

## Sheet: MDS-sAML_Patient_Samples
Patient ID	Age (yrs)	Sex	WBC (K/µL)	ANC (K/µL)	Hemoglobin (g/dL)	Platelets (K/µL)	BM blasts (%)	BM karyotype	IPSS-R	U2AF1 amino acid change	VAF (%)
283790	74	M	28.1	ND	12.6	170	1	45,XY,-7[11]/45,idem,t(2;3)(?p23;q21)[9]	NA	Q157R	47.63
338325	59	F	29.8	19.67	12.3	440	4	46,XX,del(7)(q22)[19] non-clonal: 47,XX,del(7)(q22),+8[1]	3	Q157R	46.9
438228	66	M	2.2	0.5	8.8	41	3	del(6q), -7	6.5	Q157R	29.19
609948	83	F	4.5	1.9	11.8	119	1	normal	2.5	Q157R	37.33
185295	50	M	1.7	1.1	8.2	76	ND	46,XY,del(20)(q11.2q13.3)[7]/46,XY[13]	NA	S34F	38.23
266395	64	M	40.3	18.5	9.4	33	7	46,XY[20]	5	S34F	36.3636
571656	71	M	3.5	2.1	9.4	167	4	46,XY,del(20)(q11.2q13.3)[12]/46,XY[8]	3	S34F	39.2157
917011	80	M	3.3	0.4	8.2	107	0	46,XY,del(20)(q11.2)[12]/46,XY[8]	2.5	S34F	50
221833	68	M	3	1.62	11.6	33	9	47,XY,+2[1]/47,XY,sl,t(3;21)(q26.2;q22)[2]/48,sdl,+der21t(3;21)[16]/46,XY[1]	6	WT	NA
229276	68	M	1.3	0.039	8.7	22	30	46,XY[20]	6.5	WT	NA
283773	23	F	3.2	1.6	13.3	210	1	46,XX[20]	1	WT	NA
288033	30	F	3.5	0.5	9.7	67	13	46,XX[20]	6	WT	NA
ND, not done; NA, not available; WT, wild type.
