# Supplementary material for: U2af1S34F and U2af1Q157R myeloid neoplasm-associated hotspot mutations induce distinct hematopoietic phenotypes in mice
Source: Leukemia. 2026 May 6;40(7):1467–81. doi: 10.1038/s41375-026-02974-7 (PMC13276503; doi:10.1038/s41375-026-02974-7)
Supplement: Supplementary file 4 — Table S4 Gene ontology of mouse KL DEG [file 41375_2026_2974_MOESM4_ESM.xlsx]

## Sheet: S34F_DEG_up
GO_BP	Description	GeneRatio	BgRatio	pvalue	p.adjust	qvalue	geneID	Count
GO:0030198	extracellular matrix organization	10/85	252/15307	1.29606e-06	0.000770638	0.000716927	Fap/Sulf2/Hspg2/Tgfb2/Impg2/Fbln1/Col18a1/Ltbp4/Mmp2/Adamts5	10
GO:0043062	extracellular structure organization	10/85	253/15307	1.34335e-06	0.000770638	0.000716927	Fap/Sulf2/Hspg2/Tgfb2/Impg2/Fbln1/Col18a1/Ltbp4/Mmp2/Adamts5	10
GO:0045229	external encapsulating structure organization	10/85	253/15307	1.34335e-06	0.000770638	0.000716927	Fap/Sulf2/Hspg2/Tgfb2/Impg2/Fbln1/Col18a1/Ltbp4/Mmp2/Adamts5	10
GO:0072332	intrinsic apoptotic signaling pathway by p53 class mediator	5/85	79/15307	7.65359e-05	0.0318904	0.0296677	Eda2r/Phlda3/Cdkn1a/Bbc3/Pmaip1	5
GO:0042771	intrinsic apoptotic signaling pathway in response to DNA damage by p53 class mediator	4/85	43/15307	9.26507e-05	0.0318904	0.0296677	Phlda3/Cdkn1a/Bbc3/Pmaip1	4
GO:0030216	keratinocyte differentiation	5/85	98/15307	0.000212371	0.0522636	0.048621	Etv4/Cstdc5/Epha2/Tgfb2/Stfa1	5
GO:1905477	positive regulation of protein localization to membrane	5/85	102/15307	0.000255992	0.0522636	0.048621	Epha2/Tcaf2/Bbc3/Tcaf1/Pmaip1	5
GO:0009913	epidermal cell differentiation	6/85	160/15307	0.000262865	0.0522636	0.048621	Etv4/Cstdc5/Epha2/Tgfb2/Stfa1/Jag1	6
GO:0045926	negative regulation of growth	7/85	228/15307	0.000273313	0.0522636	0.048621	Cda/Zmat3/Stc2/Cdkn1a/Tgfb2/Bbc3/Psrc1	7
GO:0008630	intrinsic apoptotic signaling pathway in response to DNA damage	5/85	108/15307	0.000333802	0.0574473	0.0534434	Phlda3/Epha2/Cdkn1a/Bbc3/Pmaip1	5
GO:0030308	negative regulation of cell growth	6/85	177/15307	0.000451168	0.0705872	0.0656675	Cda/Zmat3/Cdkn1a/Tgfb2/Bbc3/Psrc1	6
GO:0022617	extracellular matrix disassembly	3/85	30/15307	0.000602054	0.0863446	0.0803267	Fap/Tgfb2/Adamts5	3
GO_MF	Description	GeneRatio	BgRatio	pvalue	p.adjust	qvalue	geneID	Count
GO:0005201	extracellular matrix structural constituent	8/81	106/15290	8.64358e-08	1.3484e-05	1.25559e-05	Hmcn2/Hspg2/Nid2/Impg2/Fbln1/Col18a1/Vcan/Ltbp4	8
GO:0005509	calcium ion binding	9/81	481/15290	0.00097992	0.0764338	0.0711731	Astn2/Hmcn2/Sulf2/Hspg2/Nid2/Fbln1/Vcan/Jag1/Ltbp4	9
GO_CC	Description	GeneRatio	BgRatio	pvalue	p.adjust	qvalue	geneID	Count
GO:0062023	collagen-containing extracellular matrix	11/88	289/15461	7.18764e-07	6.97755e-05	6.82429e-05	Hmcn2/Hspg2/Nid2/Tgfb2/Impg2/Fbln1/Col18a1/Vcan/Ltbp4/Col20a1/Adamts5	11
GO:0031012	extracellular matrix	12/88	381/15461	1.60382e-06	6.97755e-05	6.82429e-05	Hmcn2/Hspg2/Nid2/Tgfb2/Impg2/Fbln1/Col18a1/Vcan/Ltbp4/Col20a1/Mmp2/Adamts5	12
GO:0030312	external encapsulating structure	12/88	382/15461	1.64824e-06	6.97755e-05	6.82429e-05	Hmcn2/Hspg2/Nid2/Tgfb2/Impg2/Fbln1/Col18a1/Vcan/Ltbp4/Col20a1/Mmp2/Adamts5	12
GO:0005604	basement membrane	6/88	92/15461	1.37867e-05	0.000437729	0.000428115	Hmcn2/Hspg2/Nid2/Tgfb2/Fbln1/Col18a1	6
GO:1904090	peptidase inhibitor complex	2/88	16/15461	0.00364927	0.0926915	0.0906556	Cstdc5/Stfa1	2

## Sheet: S34F_DEG_dn
GO_BP	Description	GeneRatio	BgRatio	pvalue	p.adjust	qvalue	geneID	Count	Column1
GO:0002250	adaptive immune response	15/65	400/15307	8.78387e-11	1.13663e-07	9.25542e-08	Lax1/Irf4/Cd19/Rag1/Cd226/Fcer1a/H2-Aa/Cd74/Igll1/Il7r/H2-Eb1/Gimap3/Cd7/Gzmb/Klrd1	15
GO:0002449	lymphocyte mediated immunity	12/65	282/15307	2.04387e-09	1.32238e-06	1.0768e-06	Cd19/Cd226/Fcer1a/H2-Aa/Cd74/Igll1/Il7r/H2-Eb1/Gimap3/Gzmb/Klrb1c/Klrd1	12
GO:0002460	adaptive immune response based on somatic recombination of immune receptors built from immunoglobulin superfamily domains	12/65	299/15307	3.95853e-09	1.70744e-06	1.39035e-06	Irf4/Cd19/Cd226/Fcer1a/H2-Aa/Cd74/Igll1/Il7r/H2-Eb1/Gimap3/Gzmb/Klrd1	12
GO:0002443	leukocyte mediated immunity	12/65	381/15307	5.83571e-08	1.58032e-05	1.28683e-05	Cd19/Cd226/Fcer1a/H2-Aa/Cd74/Igll1/Il7r/H2-Eb1/Gimap3/Gzmb/Klrb1c/Klrd1	12
GO:0016064	immunoglobulin mediated immune response	8/65	128/15307	6.49322e-08	1.58032e-05	1.28683e-05	Cd19/Cd226/Fcer1a/H2-Aa/Cd74/Igll1/H2-Eb1/Gimap3	8
GO:0019724	B cell mediated immunity	8/65	130/15307	7.32759e-08	1.58032e-05	1.28683e-05	Cd19/Cd226/Fcer1a/H2-Aa/Cd74/Igll1/H2-Eb1/Gimap3	8
GO:0002440	production of molecular mediator of immune response	10/65	250/15307	9.18229e-08	1.69741e-05	1.38218e-05	Vpreb1/Lax1/Vpreb3/Cd226/Fcer1a/H2-Aa/Cd74/Il7r/H2-Eb1/Gimap3	10
GO:0051249	regulation of lymphocyte activation	12/65	462/15307	4.67292e-07	7.55845e-05	6.15473e-05	Lax1/Cd19/Rag1/H2-Aa/Cd74/Igll1/Il7r/H2-Eb1/Gimap3/Slamf8/Cd209a/Klrd1	12
GO:0042113	B cell activation	9/65	258/15307	1.33992e-06	0.00019265	0.000156872	Vpreb1/Lax1/Nkx2-3/Cd19/Rag1/Cd74/Igll1/Il7r/Slamf8	9
GO:1903131	mononuclear cell differentiation	11/65	444/15307	2.3568e-06	0.00030497	0.000248332	Irf4/Nkx2-3/Cd19/Rag1/H2-Aa/Cd74/Batf3/Il7r/Gimap3/Ly6d/Slamf8	11
GO:0032103	positive regulation of response to external stimulus	10/65	390/15307	5.27158e-06	0.000620129	0.000504962	Ifi205/Cd226/Trpv4/Fcer1a/Cd74/Cxcr3/Gimap3/Cxcl12/Klrb1c/Klrd1	10
GO:0001906	cell killing	7/65	167/15307	6.63509e-06	0.00067036	0.000545864	Cd226/Il7r/Gimap3/Cxcl12/Gzmb/Klrb1c/Klrd1	7	3.26292
GO:0030098	lymphocyte differentiation	10/65	401/15307	6.73469e-06	0.00067036	0.000545864	Irf4/Nkx2-3/Cd19/Rag1/H2-Aa/Cd74/Il7r/Gimap3/Ly6d/Slamf8	10
GO:0045954	positive regulation of natural killer cell mediated cytotoxicity	4/65	30/15307	7.46854e-06	0.000690306	0.000562106	Cd226/Gimap3/Klrb1c/Klrd1	4
GO:0002717	positive regulation of natural killer cell mediated immunity	4/65	32/15307	9.73772e-06	0.00084004	0.000684032	Cd226/Gimap3/Klrb1c/Klrd1	4
GO:0031349	positive regulation of defense response	8/65	264/15307	1.51902e-05	0.00113391	0.000923325	Ifi205/Cd226/Trpv4/Fcer1a/Cd74/Gimap3/Klrb1c/Klrd1	8
GO:0001776	leukocyte homeostasis	6/65	126/15307	1.53259e-05	0.00113391	0.000923325	Vpreb1/Nkx2-3/Rag1/Cd74/Il7r/Gimap3	6
GO:0002696	positive regulation of leukocyte activation	9/65	351/15307	1.631e-05	0.00113391	0.000923325	Rag1/Cd226/Fcer1a/H2-Aa/Cd74/Igll1/Il7r/H2-Eb1/Gimap3	9
GO:0001909	leukocyte mediated cytotoxicity	6/65	128/15307	1.67658e-05	0.00113391	0.000923325	Cd226/Il7r/Gimap3/Gzmb/Klrb1c/Klrd1	6
GO:0002377	immunoglobulin production	6/65	129/15307	1.75256e-05	0.00113391	0.000923325	Vpreb1/Lax1/Vpreb3/H2-Aa/Il7r/H2-Eb1	6
GO:0045089	positive regulation of innate immune response	6/65	132/15307	1.99736e-05	0.00123075	0.00100218	Ifi205/Cd226/Cd74/Gimap3/Klrb1c/Klrd1	6
GO:0002697	regulation of immune effector process	9/65	369/15307	2.42181e-05	0.00136253	0.00110949	Vpreb3/Cd226/Fcer1a/Cd74/Il7r/Gimap3/Slamf8/Klrb1c/Klrd1	9
GO:0050867	positive regulation of cell activation	9/65	369/15307	2.42181e-05	0.00136253	0.00110949	Rag1/Cd226/Fcer1a/H2-Aa/Cd74/Igll1/Il7r/H2-Eb1/Gimap3	9
GO:0045088	regulation of innate immune response	7/65	207/15307	2.6773e-05	0.00144351	0.00117543	Ifi205/Cd226/Cd74/Gimap3/Slamf8/Klrb1c/Klrd1	7
GO:0002260	lymphocyte homeostasis	5/65	86/15307	3.15462e-05	0.00161563	0.00131558	Vpreb1/Rag1/Cd74/Il7r/Gimap3	5
GO:0050778	positive regulation of immune response	10/65	481/15307	3.24623e-05	0.00161563	0.00131558	Lax1/Ifi205/Cd19/Cd226/Fcer1a/Cd74/Igll1/Gimap3/Klrb1c/Klrd1	10
GO:0042269	regulation of natural killer cell mediated cytotoxicity	4/65	45/15307	3.87103e-05	0.00185522	0.00151068	Cd226/Gimap3/Klrb1c/Klrd1	4
GO:0001910	regulation of leukocyte mediated cytotoxicity	5/65	91/15307	4.1443e-05	0.00191526	0.00155957	Cd226/Il7r/Gimap3/Klrb1c/Klrd1	5
GO:0002683	negative regulation of immune system process	9/65	402/15307	4.72918e-05	0.00211019	0.0017183	Lax1/Vpreb3/H2-Aa/Cd74/Il7r/Gimap3/Slamf8/Cxcl12/Klrd1	9
GO:0002715	regulation of natural killer cell mediated immunity	4/65	48/15307	5.00732e-05	0.00215982	0.00175871	Cd226/Gimap3/Klrb1c/Klrd1	4
GO:0019886	antigen processing and presentation of exogenous peptide antigen via MHC class II	3/65	18/15307	5.69818e-05	0.00237853	0.0019368	H2-Aa/Cd74/H2-Eb1	3
GO:0002833	positive regulation of response to biotic stimulus	6/65	168/15307	7.72811e-05	0.003102	0.00252591	Ifi205/Cd226/Cd74/Gimap3/Klrb1c/Klrd1	6
GO:1903037	regulation of leukocyte cell-cell adhesion	8/65	333/15307	7.91083e-05	0.003102	0.00252591	Lax1/Rag1/H2-Aa/Cd74/Il7r/H2-Eb1/Gimap3/Cxcl12	8
GO:0050863	regulation of T cell activation	8/65	339/15307	8.95867e-05	0.0034035	0.00277142	Lax1/Rag1/H2-Aa/Cd74/Il7r/H2-Eb1/Gimap3/Cd209a	8
GO:0031341	regulation of cell killing	5/65	108/15307	9.39815e-05	0.0034035	0.00277142	Cd226/Il7r/Gimap3/Klrb1c/Klrd1	5
GO:0022407	regulation of cell-cell adhesion	9/65	440/15307	9.46878e-05	0.0034035	0.00277142	Lax1/Rag1/Trpv4/H2-Aa/Cd74/Il7r/H2-Eb1/Gimap3/Cxcl12	9
GO:0048872	homeostasis of number of cells	8/65	344/15307	9.91769e-05	0.00346851	0.00282435	Vpreb1/Nkx2-3/Rag1/Cd74/Il7r/Emcn/Gimap3/Cd7	8
GO:0002706	regulation of lymphocyte mediated immunity	6/65	177/15307	0.000103079	0.0035101	0.00285822	Cd226/Fcer1a/Il7r/Gimap3/Klrb1c/Klrd1	6
GO:0002495	antigen processing and presentation of peptide antigen via MHC class II	3/65	22/15307	0.000106241	0.00352504	0.00287038	H2-Aa/Cd74/H2-Eb1	3
GO:0022408	negative regulation of cell-cell adhesion	6/65	182/15307	0.000120122	0.00375283	0.00305587	Lax1/Trpv4/H2-Aa/Cd74/Gimap3/Cxcl12	6
GO:2000107	negative regulation of leukocyte apoptotic process	4/65	60/15307	0.000120788	0.00375283	0.00305587	Rag1/Cd74/Il7r/Cxcl12	4
GO:0043011	myeloid dendritic cell differentiation	3/65	23/15307	0.000121807	0.00375283	0.00305587	Irf4/Batf3/Gimap3	3
GO:0042267	natural killer cell mediated cytotoxicity	4/65	61/15307	0.000128854	0.00387458	0.00315501	Cd226/Gimap3/Klrb1c/Klrd1	4
GO:0045582	positive regulation of T cell differentiation	5/65	116/15307	0.000131748	0.00387458	0.00315501	Rag1/H2-Aa/Cd74/Il7r/Gimap3	5
GO:0002504	antigen processing and presentation of peptide or polysaccharide antigen via MHC class II	3/65	24/15307	0.000138787	0.00399089	0.00324972	H2-Aa/Cd74/H2-Eb1	3
GO:0007159	leukocyte cell-cell adhesion	8/65	366/15307	0.000152098	0.00427833	0.00348378	Lax1/Rag1/H2-Aa/Cd74/Il7r/H2-Eb1/Gimap3/Cxcl12	8
GO:0002228	natural killer cell mediated immunity	4/65	64/15307	0.000155395	0.00427833	0.00348378	Cd226/Gimap3/Klrb1c/Klrd1	4
GO:0002819	regulation of adaptive immune response	6/65	197/15307	0.000185043	0.00498845	0.00406202	Cd226/Fcer1a/Cd74/Il7r/Gimap3/Klrd1	6
GO:0045619	regulation of lymphocyte differentiation	6/65	198/15307	0.000190197	0.00502275	0.00408995	Rag1/H2-Aa/Cd74/Il7r/Gimap3/Slamf8	6
GO:0002708	positive regulation of lymphocyte mediated immunity	5/65	126/15307	0.000194182	0.00502543	0.00409213	Cd226/Fcer1a/Gimap3/Klrb1c/Klrd1	5
GO:0046651	lymphocyte proliferation	7/65	287/15307	0.000208041	0.00517849	0.00421676	Vpreb1/Cd19/H2-Aa/Cd74/Il7r/Cxcl12/Cd209a	7
GO:0001912	positive regulation of leukocyte mediated cytotoxicity	4/65	69/15307	0.0002081	0.00517849	0.00421676	Cd226/Gimap3/Klrb1c/Klrd1	4
GO:0042742	defense response to bacterium	6/65	204/15307	0.000223554	0.00538325	0.0043835	Zg16/Iigp1/Igll1/Il7r/Slamf8/Wfdc17	6
GO:0045621	positive regulation of lymphocyte differentiation	5/65	130/15307	0.000224649	0.00538325	0.0043835	Rag1/H2-Aa/Cd74/Il7r/Gimap3	5
GO:1903038	negative regulation of leukocyte cell-cell adhesion	5/65	131/15307	0.000232804	0.00545507	0.00444198	Lax1/H2-Aa/Cd74/Gimap3/Cxcl12	5
GO:0030217	T cell differentiation	7/65	293/15307	0.000236077	0.00545507	0.00444198	Irf4/Nkx2-3/Rag1/H2-Aa/Cd74/Il7r/Gimap3	7
GO:0032943	mononuclear cell proliferation	7/65	294/15307	0.000241033	0.00547188	0.00445567	Vpreb1/Cd19/H2-Aa/Cd74/Il7r/Cxcl12/Cd209a	7
GO:0051251	positive regulation of lymphocyte activation	7/65	298/15307	0.000261705	0.00583873	0.00475439	Rag1/H2-Aa/Cd74/Igll1/Il7r/H2-Eb1/Gimap3	7
GO:0002478	antigen processing and presentation of exogenous peptide antigen	3/65	30/15307	0.000273378	0.00599577	0.00488227	H2-Aa/Cd74/H2-Eb1	3
GO:0002720	positive regulation of cytokine production involved in immune response	4/65	77/15307	0.000317584	0.00673695	0.00548579	Cd226/Fcer1a/Cd74/Gimap3	4
GO:0031343	positive regulation of cell killing	4/65	77/15307	0.000317584	0.00673695	0.00548579	Cd226/Gimap3/Klrb1c/Klrd1	4
GO:0050870	positive regulation of T cell activation	6/65	222/15307	0.000352023	0.00734707	0.0059826	Rag1/H2-Aa/Cd74/Il7r/H2-Eb1/Gimap3	6
GO:0002705	positive regulation of leukocyte mediated immunity	5/65	148/15307	0.000409084	0.00840245	0.00684198	Cd226/Fcer1a/Gimap3/Klrb1c/Klrd1	5
GO:0002831	regulation of response to biotic stimulus	7/65	322/15307	0.000417818	0.00844775	0.00687887	Ifi205/Cd226/Cd74/Gimap3/Slamf8/Klrb1c/Klrd1	7
GO:0070661	leukocyte proliferation	7/65	324/15307	0.000433614	0.00863226	0.00702912	Vpreb1/Cd19/H2-Aa/Cd74/Il7r/Cxcl12/Cd209a	7
GO:0042100	B cell proliferation	4/65	86/15307	0.00048432	0.00949561	0.00773213	Vpreb1/Cd19/Cd74/Il7r	4
GO:0001773	myeloid dendritic cell activation	3/65	37/15307	0.000512212	0.00974709	0.00793691	Irf4/Batf3/Gimap3	3
GO:0019884	antigen processing and presentation of exogenous antigen	3/65	37/15307	0.000512212	0.00974709	0.00793691	H2-Aa/Cd74/H2-Eb1	3
GO:0002703	regulation of leukocyte mediated immunity	6/65	241/15307	0.000544132	0.0102045	0.00830933	Cd226/Fcer1a/Il7r/Gimap3/Klrb1c/Klrd1	6
GO:0002335	mature B cell differentiation	3/65	39/15307	0.000598823	0.0110697	0.00901386	Nkx2-3/Cd19/Slamf8	3
GO:1903039	positive regulation of leukocyte cell-cell adhesion	6/65	247/15307	0.000619246	0.011286	0.00919	Rag1/H2-Aa/Cd74/Il7r/H2-Eb1/Gimap3	6
GO:0045785	positive regulation of cell adhesion	8/65	457/15307	0.000673961	0.0121126	0.00986309	Epb41l4b/Rag1/H2-Aa/Cd74/Il7r/H2-Eb1/Gimap3/Cxcl12	8
GO:0097028	dendritic cell differentiation	3/65	41/15307	0.00069427	0.0123067	0.0100211	Irf4/Batf3/Gimap3	3
GO:0002764	immune response-regulating signaling pathway	7/65	352/15307	0.000709547	0.0123663	0.0100697	Lax1/Irf4/Cd19/Cd226/Igll1/Tlr11/Klrd1	7
GO:0045580	regulation of T cell differentiation	5/65	168/15307	0.000728409	0.0123663	0.0100697	Rag1/H2-Aa/Cd74/Il7r/Gimap3	5
GO:0002714	positive regulation of B cell mediated immunity	3/65	42/15307	0.000745417	0.0123663	0.0100697	Cd226/Fcer1a/Gimap3	3
GO:0002891	positive regulation of immunoglobulin mediated immune response	3/65	42/15307	0.000745417	0.0123663	0.0100697	Cd226/Fcer1a/Gimap3	3
GO:0070229	negative regulation of lymphocyte apoptotic process	3/65	42/15307	0.000745417	0.0123663	0.0100697	Rag1/Cd74/Il7r	3
GO:2000106	regulation of leukocyte apoptotic process	4/65	97/15307	0.000763143	0.0124872	0.0101682	Rag1/Cd74/Il7r/Cxcl12	4
GO:0002399	MHC class II protein complex assembly	2/65	10/15307	0.000781658	0.0124872	0.0101682	H2-Aa/H2-Eb1	2
GO:0002503	peptide antigen assembly with MHC class II protein complex	2/65	10/15307	0.000781658	0.0124872	0.0101682	H2-Aa/H2-Eb1	2
GO:0002699	positive regulation of immune effector process	6/65	260/15307	0.000809579	0.0127755	0.0104029	Cd226/Fcer1a/Cd74/Gimap3/Klrb1c/Klrd1	6
GO:0001782	B cell homeostasis	3/65	44/15307	0.000854771	0.0133262	0.0108513	Vpreb1/Cd74/Il7r	3
GO:0002700	regulation of production of molecular mediator of immune response	5/65	176/15307	0.000898053	0.0138343	0.0112651	Vpreb3/Cd226/Fcer1a/Cd74/Gimap3	5
GO:0002253	activation of immune response	6/65	269/15307	0.000965849	0.0147036	0.0119729	Lax1/Ifi205/Cd19/Cd226/Igll1/Klrd1	6
GO:0007162	negative regulation of cell adhesion	6/65	271/15307	0.00100353	0.0150997	0.0122954	Lax1/Trpv4/H2-Aa/Cd74/Gimap3/Cxcl12	6
GO:0002822	regulation of adaptive immune response based on somatic recombination of immune receptors built from immunoglobulin superfamily domains	5/65	181/15307	0.00101806	0.0151422	0.01233	Cd226/Fcer1a/Il7r/Gimap3/Klrd1	5
GO:0002688	regulation of leukocyte chemotaxis	4/65	106/15307	0.0010634	0.0156368	0.0127328	Trpv4/Cd74/Slamf8/Cxcl12	4
GO:0043029	T cell homeostasis	3/65	48/15307	0.00110287	0.016035	0.0130571	Rag1/Il7r/Gimap3	3
GO:1902107	positive regulation of leukocyte differentiation	5/65	187/15307	0.00117737	0.0167419	0.0136327	Rag1/H2-Aa/Cd74/Il7r/Gimap3	5
GO:1903708	positive regulation of hemopoiesis	5/65	187/15307	0.00117737	0.0167419	0.0136327	Rag1/H2-Aa/Cd74/Il7r/Gimap3	5
GO:0002429	immune response-activating cell surface receptor signaling pathway	5/65	190/15307	0.00126362	0.0177731	0.0144723	Lax1/Cd19/Cd226/Igll1/Klrd1	5
GO:0002757	immune response-activating signal transduction	5/65	191/15307	0.00129338	0.0179576	0.0146226	Lax1/Cd19/Cd226/Igll1/Klrd1	5
GO:0002718	regulation of cytokine production involved in immune response	4/65	112/15307	0.00130449	0.0179576	0.0146226	Cd226/Fcer1a/Cd74/Gimap3	4
GO:0051928	positive regulation of calcium ion transport	4/65	113/15307	0.00134809	0.0182571	0.0148664	Cd19/Cxcr3/Gimap3/Cxcl12	4
GO:0050920	regulation of chemotaxis	5/65	193/15307	0.00135447	0.0182571	0.0148664	Trpv4/Cd74/Cxcr3/Slamf8/Cxcl12	5
GO:0034341	response to interferon-gamma	4/65	114/15307	0.0013927	0.0185789	0.0151285	Ciita/H2-Aa/Cd74/H2-Eb1	4
GO:0002698	negative regulation of immune effector process	4/65	115/15307	0.00143833	0.0187637	0.015279	Vpreb3/Il7r/Slamf8/Klrd1	4
GO:0022409	positive regulation of cell-cell adhesion	6/65	291/15307	0.00144595	0.0187637	0.015279	Rag1/H2-Aa/Cd74/Il7r/H2-Eb1/Gimap3	6
GO:0030595	leukocyte chemotaxis	5/65	196/15307	0.00145005	0.0187637	0.015279	Trpv4/Cd74/Cxcr3/Slamf8/Cxcl12	5
GO:0001913	T cell mediated cytotoxicity	3/65	53/15307	0.00147136	0.0188508	0.0153499	Il7r/Gzmb/Klrd1	3
GO:0002396	MHC protein complex assembly	2/65	14/15307	0.00156345	0.0196418	0.015994	H2-Aa/H2-Eb1	2
GO:0002501	peptide antigen assembly with MHC protein complex	2/65	14/15307	0.00156345	0.0196418	0.015994	H2-Aa/H2-Eb1	2
GO:0002768	immune response-regulating cell surface receptor signaling pathway	5/65	200/15307	0.00158514	0.0197229	0.01606	Lax1/Cd19/Cd226/Igll1/Klrd1	5
GO:0050868	negative regulation of T cell activation	4/65	119/15307	0.00163131	0.0199143	0.0162159	Lax1/H2-Aa/Cd74/Gimap3	4
GO:0071887	leukocyte apoptotic process	4/65	119/15307	0.00163131	0.0199143	0.0162159	Rag1/Cd74/Il7r/Cxcl12	4
GO:1902105	regulation of leukocyte differentiation	6/65	303/15307	0.00177501	0.0214267	0.0174474	Rag1/H2-Aa/Cd74/Il7r/Gimap3/Slamf8	6
GO:0055003	cardiac myofibril assembly	2/65	15/15307	0.00179905	0.0214267	0.0174474	Nrap/Csrp3	2
GO:0002685	regulation of leukocyte migration	5/65	206/15307	0.00180487	0.0214267	0.0174474	Trpv4/Cd74/Cxcr3/Slamf8/Cxcl12	5
GO:0002702	positive regulation of production of molecular mediator of immune response	4/65	123/15307	0.00184163	0.0216643	0.0176409	Cd226/Fcer1a/Cd74/Gimap3	4
GO:0050921	positive regulation of chemotaxis	4/65	124/15307	0.00189701	0.0221147	0.0180077	Trpv4/Cd74/Cxcr3/Cxcl12	4
GO:0002573	myeloid leukocyte differentiation	5/65	214/15307	0.00213165	0.0246282	0.0200544	Irf4/Nkx2-3/Cd74/Batf3/Gimap3	5
GO:0002712	regulation of B cell mediated immunity	3/65	61/15307	0.00220657	0.0248287	0.0202176	Cd226/Fcer1a/Gimap3	3
GO:0002889	regulation of immunoglobulin mediated immune response	3/65	61/15307	0.00220657	0.0248287	0.0202176	Cd226/Fcer1a/Gimap3	3
GO:0048002	antigen processing and presentation of peptide antigen	3/65	61/15307	0.00220657	0.0248287	0.0202176	H2-Aa/Cd74/H2-Eb1	3
GO:0002821	positive regulation of adaptive immune response	4/65	130/15307	0.00225378	0.0249264	0.0202972	Cd226/Fcer1a/Cd74/Gimap3	4
GO:0050864	regulation of B cell activation	4/65	130/15307	0.00225378	0.0249264	0.0202972	Cd19/Cd74/Igll1/Slamf8	4
GO:0002367	cytokine production involved in immune response	4/65	131/15307	0.00231743	0.0254132	0.0206935	Cd226/Fcer1a/Cd74/Gimap3	4
GO:0001819	positive regulation of cytokine production	7/65	436/15307	0.00242993	0.0264229	0.0215158	Irf4/Ifi205/Cd226/Trpv4/Fcer1a/Cd74/Gimap3	7
GO:0006959	humoral immune response	4/65	136/15307	0.00265438	0.0286231	0.0233073	Igll1/Gimap3/Cxcl12/Wfdc17	4
GO:0030183	B cell differentiation	4/65	137/15307	0.00272559	0.0291481	0.0237348	Nkx2-3/Cd19/Rag1/Slamf8	4
GO:0002274	myeloid leukocyte activation	5/65	229/15307	0.00285804	0.030242	0.0246256	Irf4/Cd226/Fcer1a/Batf3/Gimap3	5
GO:0002710	negative regulation of T cell mediated immunity	2/65	19/15307	0.00289799	0.030242	0.0246256	Il7r/Klrd1	2
GO:0010818	T cell chemotaxis	2/65	19/15307	0.00289799	0.030242	0.0246256	Cxcr3/Cxcl12	2
GO:0050900	leukocyte migration	6/65	335/15307	0.00293222	0.0303543	0.0247171	Nkx2-3/Trpv4/Cd74/Cxcr3/Slamf8/Cxcl12	6
GO:0070228	regulation of lymphocyte apoptotic process	3/65	68/15307	0.00300849	0.0308967	0.0251587	Rag1/Cd74/Il7r	3
GO:0097553	calcium ion transmembrane import into cytosol	4/65	147/15307	0.00351123	0.0357759	0.0291317	Cd19/Trpv4/Cxcr3/Gimap3	4
GO:0001911	negative regulation of leukocyte mediated cytotoxicity	2/65	22/15307	0.00388286	0.0392533	0.0319634	Il7r/Klrd1	2
GO:0090025	regulation of monocyte chemotaxis	2/65	23/15307	0.00424106	0.0422166	0.0343764	Slamf8/Cxcl12	2
GO:0051250	negative regulation of lymphocyte activation	4/65	155/15307	0.00424124	0.0422166	0.0343764	Lax1/H2-Aa/Cd74/Gimap3	4
GO:0050851	antigen receptor-mediated signaling pathway	4/65	157/15307	0.00443859	0.0435116	0.0354308	Lax1/Cd19/Cd226/Igll1	4
GO:0071674	mononuclear cell migration	4/65	157/15307	0.00443859	0.0435116	0.0354308	Trpv4/Cxcr3/Slamf8/Cxcl12	4
GO:0002690	positive regulation of leukocyte chemotaxis	3/65	81/15307	0.00492533	0.0479201	0.0390206	Trpv4/Cd74/Cxcl12	3
GO:0060326	cell chemotaxis	5/65	261/15307	0.00498298	0.0481193	0.0391828	Trpv4/Cd74/Cxcr3/Slamf8/Cxcl12	5
GO:1904427	positive regulation of calcium ion transmembrane transport	3/65	82/15307	0.00509702	0.0488559	0.0397826	Cd19/Cxcr3/Gimap3	3
GO:0043270	positive regulation of ion transport	5/65	263/15307	0.00514502	0.0488966	0.0398158	Cd19/Scn4b/Cxcr3/Gimap3/Cxcl12	5
GO:0030101	natural killer cell activation	3/65	83/15307	0.0052723	0.0488966	0.0398158	Il2rb/Klrb1c/Klrd1	3
GO:0043367	CD4-positive, alpha-beta T cell differentiation	3/65	83/15307	0.0052723	0.0488966	0.0398158	Irf4/Nkx2-3/Gimap3	3
GO:0002366	leukocyte activation involved in immune response	5/65	265/15307	0.00531076	0.0488966	0.0398158	Irf4/Nkx2-3/Cd19/Fcer1a/Cd74	5
GO:1903706	regulation of hemopoiesis	6/65	379/15307	0.00534926	0.0488966	0.0398158	Rag1/H2-Aa/Cd74/Il7r/Gimap3/Slamf8	6
GO:0031342	negative regulation of cell killing	2/65	26/15307	0.00540357	0.0488966	0.0398158	Il7r/Klrd1	2
GO:0048535	lymph node development	2/65	26/15307	0.00540357	0.0488966	0.0398158	Nkx2-3/Il7r	2
GO:1902230	negative regulation of intrinsic apoptotic signaling pathway in response to DNA damage	2/65	26/15307	0.00540357	0.0488966	0.0398158	Cd74/Cxcl12	2
GO:0002263	cell activation involved in immune response	5/65	268/15307	0.00556644	0.0500207	0.0407311	Irf4/Nkx2-3/Cd19/Fcer1a/Cd74	5
GO:0046597	negative regulation of viral entry into host cell	2/65	27/15307	0.00581995	0.0519381	0.0422924	Ciita/Cd74	2
GO:0070227	lymphocyte apoptotic process	3/65	87/15307	0.00600954	0.0532627	0.043371	Rag1/Cd74/Il7r	3
GO:0033005	positive regulation of mast cell activation	2/65	28/15307	0.00625057	0.0546502	0.0445009	Cd226/Fcer1a	2
GO:0070233	negative regulation of T cell apoptotic process	2/65	28/15307	0.00625057	0.0546502	0.0445009	Rag1/Il7r	2
GO:0010758	regulation of macrophage chemotaxis	2/65	29/15307	0.00669529	0.0573756	0.04672	Trpv4/Slamf8	2
GO:0071542	dopaminergic neuron differentiation	2/65	29/15307	0.00669529	0.0573756	0.04672	Pax5/Cxcl12	2
GO:1903901	negative regulation of viral life cycle	2/65	29/15307	0.00669529	0.0573756	0.04672	Ciita/Cd74	2
GO:0002695	negative regulation of leukocyte activation	4/65	182/15307	0.00744865	0.0634115	0.051635	Lax1/H2-Aa/Cd74/Gimap3	4
GO:0002285	lymphocyte activation involved in immune response	4/65	183/15307	0.0075912	0.0642027	0.0522793	Irf4/Nkx2-3/Cd19/Cd74	4
GO:0033077	T cell differentiation in thymus	3/65	98/15307	0.0083434	0.0701062	0.0570864	Rag1/Cd74/Il7r	3
GO:0042832	defense response to protozoan	2/65	33/15307	0.0086128	0.071903	0.0585495	Irf4/Iigp1	2
GO:0051281	positive regulation of release of sequestered calcium ion into cytosol	2/65	34/15307	0.00912622	0.0757009	0.061642	Cd19/Cxcr3	2
GO:0050727	regulation of inflammatory response	5/65	305/15307	0.00947417	0.0780688	0.0635702	Casp12/Trpv4/Fcer1a/Serpinf1/Slamf8	5
GO:0071675	regulation of mononuclear cell migration	3/65	103/15307	0.00955713	0.0780688	0.0635702	Trpv4/Slamf8/Cxcl12	3
GO:0001562	response to protozoan	2/65	35/15307	0.00965302	0.0780688	0.0635702	Irf4/Iigp1	2
GO:0032633	interleukin-4 production	2/65	35/15307	0.00965302	0.0780688	0.0635702	Irf4/Zg16	2
GO:0019882	antigen processing and presentation	3/65	105/15307	0.01007	0.0809192	0.0658913	H2-Aa/Cd74/H2-Eb1	3
GO:0002455	humoral immune response mediated by circulating immunoglobulin	2/65	36/15307	0.0101931	0.0809192	0.0658913	Igll1/Gimap3	2
GO:0046456	icosanoid biosynthetic process	2/65	36/15307	0.0101931	0.0809192	0.0658913	Fcer1a/Cd74	2
GO:1902229	regulation of intrinsic apoptotic signaling pathway in response to DNA damage	2/65	37/15307	0.0107463	0.0847907	0.0690437	Cd74/Cxcl12	2
GO:0050866	negative regulation of cell activation	4/65	203/15307	0.0108304	0.0849364	0.0691624	Lax1/H2-Aa/Cd74/Gimap3	4
GO:0097529	myeloid leukocyte migration	4/65	204/15307	0.0110124	0.0858437	0.0699012	Trpv4/Cd74/Slamf8/Cxcl12	4
GO:0061081	positive regulation of myeloid leukocyte cytokine production involved in immune response	2/65	38/15307	0.0113125	0.0876548	0.0713759	Fcer1a/Cd74	2
GO:0043368	positive T cell selection	2/65	39/15307	0.0118916	0.0910516	0.0741419	Irf4/Cd74	2
GO:0048246	macrophage chemotaxis	2/65	39/15307	0.0118916	0.0910516	0.0741419	Trpv4/Slamf8	2
GO:0035710	CD4-positive, alpha-beta T cell activation	3/65	113/15307	0.0122799	0.0934716	0.0761125	Irf4/Nkx2-3/Gimap3	3
GO:0048247	lymphocyte chemotaxis	2/65	40/15307	0.0124835	0.0944658	0.076922	Cxcr3/Cxcl12	2
GO:0001914	regulation of T cell mediated cytotoxicity	2/65	41/15307	0.0130881	0.0984649	0.0801785	Il7r/Klrd1	2
GO_MF	Description	GeneRatio	BgRatio	pvalue	p.adjust	qvalue	geneID	Count
GO:0140375	immune receptor activity	7/63	114/15290	4.17037e-07	7.25645e-05	6.3653e-05	Fcer1a/Cd74/Il7r/Cxcr3/H2-Eb1/Il2rb/Klrd1	7
GO:0023023	MHC protein complex binding	4/63	21/15290	1.48593e-06	0.000129276	0.0001134	H2-Aa/Cd74/H2-Eb1/Klrd1	4
GO:0023026	MHC class II protein complex binding	3/63	12/15290	1.42834e-05	0.000828437	0.000726699	H2-Aa/Cd74/H2-Eb1	3
GO:0003823	antigen binding	4/63	50/15290	5.22844e-05	0.00227437	0.00199506	H2-Aa/Igll1/H2-Eb1/Klrd1	4
GO:0004896	cytokine receptor activity	4/63	86/15290	0.00043155	0.015018	0.0131736	Cd74/Il7r/Cxcr3/Il2rb	4
GO:0042609	CD4 receptor binding	2/63	12/15290	0.00107383	0.0311412	0.0273168	Cd74/H2-Eb1	2
GO:0019955	cytokine binding	4/63	124/15290	0.0016967	0.0421751	0.0369957	Cd74/Scube3/Cxcr3/Il2rb	4
GO:0030246	carbohydrate binding	5/63	218/15290	0.0020213	0.0439632	0.0385642	Zg16/H2-Eb1/Cd209a/Klrb1c/Klrd1	5
GO:0042605	peptide antigen binding	2/63	25/15290	0.00471569	0.0911699	0.0799736	H2-Aa/H2-Eb1	2
GO_CC	Description	GeneRatio	BgRatio	pvalue	p.adjust	qvalue	geneID	Count
GO:0009897	external side of plasma membrane	17/67	397/15461	6.80421e-13	7.41659e-11	7.0907e-11	Rtn4rl1/Vpreb1/Cd19/Gfra1/Cd226/Fcer1a/H2-Aa/Cd74/Igll1/Il7r/Cxcr3/H2-Eb1/Cxcl12/Il2rb/Cd209a/Klrb1c/Klrd1	17
GO:0042613	MHC class II protein complex	3/67	11/15461	1.25195e-05	0.000682315	0.000652334	H2-Aa/Cd74/H2-Eb1	3
GO:0042611	MHC protein complex	3/67	25/15461	0.000167096	0.00607115	0.00580439	H2-Aa/Cd74/H2-Eb1	3
GO:0005796	Golgi lumen	2/67	17/15461	0.00241248	0.06574	0.0628514	Sdc2/Zg16	2

## Sheet: Q157R_DEG_up
GO_BP	Description	GeneRatio	BgRatio	pvalue	p.adjust	qvalue	geneID	Count
GO:0042551	neuron maturation	3/29	49/15212	0.000108198	0.0666952	0.0489217	Nrxn1/Adgrb3/Ednra	3
GO:0019236	response to pheromone	3/29	64/15212	0.000240024	0.0666952	0.0489217	Vmn1r230/Vmn1r38/Vmn1r201	3
GO:0016322	neuron remodeling	2/29	14/15212	0.000314837	0.0666952	0.0489217	Adgrb3/Ednra	2
GO:0003214	cardiac left ventricle morphogenesis	2/29	15/15212	0.000362844	0.0666952	0.0489217	Tgfb2/Ednra	2
GO:0060973	cell migration involved in heart development	2/29	15/15212	0.000362844	0.0666952	0.0489217	Snai2/Ednra	2
GO:0003198	epithelial to mesenchymal transition involved in endocardial cushion formation	2/29	16/15212	0.000414189	0.0666952	0.0489217	Tgfb2/Snai2	2
GO:0032230	positive regulation of synaptic transmission, GABAergic	2/29	16/15212	0.000414189	0.0666952	0.0489217	Nrxn1/Nalcn	2
GO:0099558	maintenance of synapse structure	2/29	17/15212	0.000468859	0.0666952	0.0489217	Nrxn1/Adgrb3	2
GO:0061037	negative regulation of cartilage development	2/29	21/15212	0.000720558	0.0832784	0.0610857	Tgfb2/Snai2	2
GO:0060037	pharyngeal system development	2/29	23/15212	0.000866051	0.0832784	0.0610857	Tgfb2/Ednra	2
GO:0099560	synaptic membrane adhesion	2/29	24/15212	0.000943668	0.0832784	0.0610857	Nrxn1/Ptprf	2
GO:0071695	anatomical structure maturation	4/29	234/15212	0.000957992	0.0832784	0.0610857	Nrxn1/Tgfb2/Adgrb3/Ednra	4
GO:0003272	endocardial cushion formation	2/29	25/15212	0.00102451	0.0832784	0.0610857	Tgfb2/Snai2	2
GO:0060317	cardiac epithelial to mesenchymal transition	2/29	25/15212	0.00102451	0.0832784	0.0610857	Tgfb2/Snai2	2
GO:0010737	protein kinase A signaling	2/29	28/15212	0.00128632	0.0975889	0.0715827	Nrxn1/Ednra	2
GO_MF	Description	GeneRatio	BgRatio	pvalue	p.adjust	qvalue	geneID	Count
GO:0005549	odorant binding	7/28	221/15188	1.14683e-07	1.22711e-05	1.00197e-05	Or8d1b/Or9k2/Vmn1r230/Vmn1r38/Or5an1b/Or5l14/Vmn1r201	7
GO:0005550	pheromone binding	3/28	52/15188	0.000116734	0.00624528	0.00509944	Vmn1r230/Vmn1r38/Vmn1r201	3
GO:0016503	pheromone receptor activity	3/28	61/15188	0.000188004	0.00670546	0.00547519	Vmn1r230/Vmn1r38/Vmn1r201	3
GO:0004930	G protein-coupled receptor activity	5/28	434/15188	0.00106265	0.0284258	0.0232104	Vmn1r230/Vmn1r38/Adgrb3/Ednra/Vmn1r201	5
GO_CC	Description	GeneRatio	BgRatio	pvalue	p.adjust	qvalue	geneID	Count
NA

## Sheet: Q157R_DEG_dn
GO_BP	Description	GeneRatio	BgRatio	pvalue	p.adjust	qvalue	geneID	Count
NA
GO_MF	Description	GeneRatio	BgRatio	pvalue	p.adjust	qvalue	geneID	Count
NA
GO_CC	Description	GeneRatio	BgRatio	pvalue	p.adjust	qvalue	geneID	Count
NA
