# Supplementary material for: U2af1S34F and U2af1Q157R myeloid neoplasm-associated hotspot mutations induce distinct hematopoietic phenotypes in mice
Source: Leukemia. 2026 May 6;40(7):1467–81. doi: 10.1038/s41375-026-02974-7 (PMC13276503; doi:10.1038/s41375-026-02974-7)
Supplement: Supplementary file 6 — Table S6 Mouse KL Q157R alternative splicing [file 41375_2026_2974_MOESM6_ESM.xlsx]

## Sheet: A3SS
GeneID	geneSymbol	chr	strand	longExonStart_0base	longExonEnd	shortES	shortEE	flankingES	flankingEE	ID.1	IJC_SAMPLE_1	SJC_SAMPLE_1	IJC_SAMPLE_2	SJC_SAMPLE_2	IncFormLen	SkipFormLen	PValue	FDR	IncLevel1	IncLevel2	IncLevelDifference	chr.start.stop.long	chr.start.stop.short
ENSMUSG00000025085	Ablim1	chr19	-	57046924	57047071	57046924	57047065	57049461	57049509	3	978	8312525	144417	1711056	156	150	3.03382e-05	0.00291397	0.094,0.051,0.235	0.442,0.278,0.226	-0.189	chr19:57047071-57049462(-)	chr19:57047065-57049462(-)
ENSMUSG00000035818	Plekhs1	chr19	+	56471697	56471832	56471700	56471832	56470936	56471043	4	0	110	10	0	153	150	1	1	0.0,0.0,NA	NA,1.0,NA	-1	chr19:56471043-56471698(+)	chr19:56471043-56471701(+)
ENSMUSG00000024985	Tcf7l2	chr19	+	55917338	55917479	55917353	55917479	55912558	55912645	7	765	19115	1122	32212	165	150	0.459695	1	0.251,0.331,0.476	0.233,0.331,0.132	0.121	chr19:55912645-55917339(+)	chr19:55912645-55917354(+)
ENSMUSG00000025231	Sufu	chr19	+	46453158	46453315	46453161	46453315	46450890	46450963	10	758439	15010747	2415277	2216592	153	150	0.0762288	0.459243	0.329,0.435,0.449	0.517,0.475,0.451	-0.077	chr19:46450963-46453159(+)	chr19:46450963-46453162(+)
ENSMUSG00000037126	Psd	chr19	-	46320768	46320966	46320768	46320963	46322055	46322496	11	2	100	40	20	153	150	1	1	0.0,NA,1.0	NA,0.662,NA	-0.162	chr19:46320966-46322056(-)	chr19:46320963-46322056(-)
ENSMUSG00000025224	Gbf1	chr19	+	46268390	46268516	46268419	46268516	46267992	46268116	12	355334161	652	128619301	150	179	150	0.931059	1	0.98,0.982,0.985	1.0,0.972,1.0	-0.008	chr19:46268116-46268391(+)	chr19:46268116-46268420(+)
ENSMUSG00000015176	Nolc1	chr19	+	46078857	46079021	46078872	46079021	46078702	46078758	13	201411	19314792	123622	102361189	165	150	0.810743	1	0.086,0.08,0.098	0.097,0.083,0.096	-0.004	chr19:46078758-46078858(+)	chr19:46078758-46078873(+)
ENSMUSG00000015176	Nolc1	chr19	+	46078857	46079021	46078875	46079021	46078702	46078758	14	452417	1213870486	185734	3751720960	168	150	0.62188	1	0.032,0.024,0.03	0.041,0.029,0.031	-0.005	chr19:46078758-46078858(+)	chr19:46078758-46078876(+)
ENSMUSG00000015176	Nolc1	chr19	+	46078872	46079021	46078875	46079021	46078702	46078758	15	21815798	1213870486	108382201	3751720960	153	150	0.0369222	0.304194	0.15,0.15,0.165	0.22,0.179,0.17	-0.035	chr19:46078758-46078873(+)	chr19:46078758-46078876(+)
ENSMUSG00000015176	Nolc1	chr19	+	46079907	46080085	46079910	46080085	46079130	46079258	16	706523258	819537252	2201032567	2551126635	153	150	0.593911	1	0.458,0.488,0.501	0.458,0.473,0.467	0.016	chr19:46079258-46079908(+)	chr19:46079258-46079911(+)
ENSMUSG00000040913	Fbxw4	chr19	-	45579120	45579262	45579120	45579207	45579652	45579793	19	31515992	132014	74388187	125514	205	150	0.122983	0.596586	0.947,0.853,0.828	0.819,0.838,0.907	0.021	chr19:45579262-45579653(-)	chr19:45579207-45579653(-)
ENSMUSG00000025193	Cutc	chr19	+	43762872	43763006	43762902	43763006	43760688	43760724	20	14912960	102213	50243121	33819	180	150	0.827227	1	0.925,0.83,0.794	0.933,0.842,0.841	-0.022	chr19:43760724-43762873(+)	chr19:43760724-43762903(+)
ENSMUSG00000025157	Zdhhc16	chr19	+	41938719	41938836	41938807	41938836	41938363	41938452	22	1057641	515315169	5212667	125664370	238	150	0.918139	1	0.114,0.132,0.133	0.208,0.107,0.102	-0.013	chr19:41938452-41938720(+)	chr19:41938452-41938808(+)
ENSMUSG00000025154	Arhgap19	chr19	-	41781157	41781349	41781157	41781304	41782330	41782396	23	765457260	273022	234989552	145122	195	150	0.56292	1	0.956,0.921,0.901	0.928,0.937,0.951	-0.013	chr19:41781349-41782331(-)	chr19:41781304-41782331(-)
ENSMUSG00000041180	Hectd2	chr19	+	36601428	36601528	36601431	36601528	36599595	36599719	28	710	342	81	122	153	150	0.576684	1	0.696,0.197,0.0	0.0,0.797,0.329	-0.078	chr19:36599719-36601429(+)	chr19:36599719-36601432(+)
ENSMUSG00000041180	Hectd2	chr19	+	36609255	36609423	36609264	36609423	36606385	36606474	31	710	830	130	110	159	150	1	1	0.452,0.239,NA	1.0,0.205,NA	-0.257	chr19:36606474-36609256(+)	chr19:36606474-36609265(+)
ENSMUSG00000024795	Kif20b	chr19	+	34936937	34937084	34936966	34937084	34936776	34936848	32	468327180	973	137529323	2169	179	150	0.274463	0.892679	0.978,0.975,0.98	0.983,0.965,0.968	0.006	chr19:34936848-34936938(+)	chr19:34936848-34936967(+)
ENSMUSG00000024795	Kif20b	chr19	+	34941212	34941441	34941332	34941441	34940092	34940231	33	18713546	23317457	55187124	69317177	270	150	0.176781	0.729372	0.308,0.301,0.31	0.307,0.247,0.28	0.028	chr19:34940231-34941213(+)	chr19:34940231-34941333(+)
ENSMUSG00000024781	Lipa	chr19	-	34524737	34524846	34524737	34524842	34527365	34527474	34	18518577	1797	62287138	32410	154	150	0.836882	1	0.914,0.952,0.915	0.953,0.921,0.931	-0.008	chr19:34524846-34527366(-)	chr19:34524842-34527366(-)
ENSMUSG00000024924	Vldlr	chr19	+	27241234	27241453	27241299	27241453	27240465	27240637	37	331918	220	711329	112	215	150	0.111872	0.569754	0.92,0.869,1.0	1.0,0.878,0.91	0	chr19:27240637-27241235(+)	chr19:27240637-27241300(+)
ENSMUSG00000024659	Anxa1	chr19	-	20384474	20384583	20384474	20384579	20384692	20384772	39	659529842496	471410	2692119326120	135132	154	150	1	1	0.993,0.995,0.996	0.995,0.996,0.995	-0.001	chr19:20384583-20384693(-)	chr19:20384579-20384693(-)
ENSMUSG00000024680	Ms4a2	chr19	-	11618853	11619009	11618853	11618898	11619616	11619673	50	368253152	1031	157597322	196	261	150	0.777578	1	0.955,0.98,0.989	0.989,0.974,0.969	-0.003	chr19:11619009-11619617(-)	chr19:11618898-11619617(-)
ENSMUSG00000024677	Ms4a6b	chr19	+	11526620	11526897	11526699	11526897	11523909	11523966	52	2499	24917488	53021	91440196	229	150	0.907399	1	0.059,0.033,0.063	0.035,0.043,0.066	0.004	chr19:11523966-11526621(+)	chr19:11523966-11526700(+)
ENSMUSG00000024735	Prpf19	chr19	+	10898925	10899124	10898982	10899124	10897816	10897893	55	21814064	19991248667	69377217	66530061792	207	150	0.322712	0.96603	0.073,0.075,0.065	0.07,0.083,0.081	-0.007	chr19:10897893-10898926(+)	chr19:10897893-10898983(+)
ENSMUSG00000071647	Eml3	chr19	+	8931043	8931304	8931046	8931304	8930798	8930970	57	23718393	16011277	63313192	44225122	153	150	0.98212	1	0.592,0.616,0.542	0.584,0.577,0.607	-0.006	chr19:8930970-8931044(+)	chr19:8930970-8931047(+)
ENSMUSG00000010110	Stx5a	chr19	+	8754876	8755642	8754908	8755642	8749905	8750027	59	1498	506406181	72011	157699334	182	150	0.620675	1	0.022,0.018,0.035	0.035,0.023,0.026	-0.003	chr19:8750027-8754877(+)	chr19:8750027-8754909(+)
ENSMUSG00000024963	Dnajc4	chr19	-	6989422	6989587	6989422	6989584	6989680	6989865	62	446224	9194	258861	71916	153	150	0.916949	1	0.827,0.762,0.855	0.778,0.82,0.789	0.019	chr19:6989587-6989681(-)	chr19:6989584-6989681(-)
ENSMUSG00000024962	Vegfb	chr19	-	6985360	6985596	6985360	6985495	6985804	6985840	63	26420390	22416865	66322227	59247172	251	150	0.781407	1	0.413,0.419,0.453	0.401,0.438,0.441	0.002	chr19:6985596-6985805(-)	chr19:6985495-6985805(-)
ENSMUSG00000024949	Sf1	chr19	+	6374524	6374608	6374548	6374608	6374009	6374283	69	44336	23401639832	146830	75833211968	174	150	0.644346	1	0.016,0.017,0.006	0.016,0.017,0.013	-0.002	chr19:6374283-6374525(+)	chr19:6374283-6374549(+)
ENSMUSG00000024949	Sf1	chr19	+	6374718	6374898	6374819	6374898	6374548	6374608	71	318623241170	953	103946022788	265	251	150	1	1	0.995,0.996,0.996	0.997,0.998,0.997	-0.002	chr19:6374608-6374719(+)	chr19:6374608-6374820(+)
ENSMUSG00000054874	Pcnx3	chr19	-	5677124	5677275	5677124	5677167	5677405	5677498	72	504426201	21	149656338	210	258	150	1	1	1.0,0.992,0.992	0.977,0.997,1.0	0.003	chr19:5677275-5677406(-)	chr19:5677167-5677406(-)
ENSMUSG00000054874	Pcnx3	chr19	-	5681431	5681574	5681431	5681553	5683306	5683412	74	373013	33267	215140	7299	171	150	0.0108414	0.145047	0.496,0.503,0.62	0.725,0.607,0.796	-0.17	chr19:5681574-5683307(-)	chr19:5681553-5683307(-)
ENSMUSG00000024906	Mus81	chr19	-	5483107	5483221	5483107	5483191	5483454	5483558	77	982	1119756	2116	3417180	180	150	1	1	0.063,0.064,0.029	0.047,0.051,0.059	0	chr19:5483221-5483455(-)	chr19:5483191-5483455(-)
ENSMUSG00000024906	Mus81	chr19	-	5483634	5483763	5483634	5483665	5483929	5484025	78	18716391	8712	61320178	72317	248	150	0.216728	0.805314	0.934,0.934,0.821	0.841,0.894,0.864	0.03	chr19:5483763-5483930(-)	chr19:5483665-5483930(-)
ENSMUSG00000047423	AI837181	chr19	+	5425936	5427313	5425950	5427313	5425156	5425308	81	835219	501378181	3212362	162696405	164	150	0.183297	0.73819	0.132,0.112,0.088	0.153,0.139,0.123	-0.028	chr19:5425308-5425937(+)	chr19:5425308-5425951(+)
ENSMUSG00000024914	Drap1	chr19	-	5423559	5423674	5423559	5423653	5423771	5423891	82	33620991	19261334648	144410253	72326941525	171	150	0.580877	1	0.133,0.121,0.11	0.149,0.118,0.127	-0.01	chr19:5423674-5423772(-)	chr19:5423653-5423772(-)
ENSMUSG00000024858	Grk2	chr19	-	4289897	4290020	4289897	4290005	4290073	4290168	84	18113	18911394831	2117	69428051523	165	150	1	1	0.009,0.007,0.003	0.003,0.004,0.004	0.003	chr19:4290020-4290074(-)	chr19:4290005-4290074(-)
ENSMUSG00000005986	Ankrd13d	chr19	-	4281917	4282042	4281917	4282034	4282168	4282304	85	392412	710	16589	240	158	150	0.43033	1	0.841,0.958,1.0	0.884,0.932,1.0	-0.006	chr19:4282042-4282169(-)	chr19:4282034-4282169(-)
ENSMUSG00000034616	Ssh3	chr19	-	4265609	4265715	4265609	4265703	4265809	4265998	86	1952	1005628	2216	3215488	162	150	0.397032	1	0.15,0.076,0.062	0.055,0.112,0.059	0.021	chr19:4265715-4265810(-)	chr19:4265703-4265810(-)
ENSMUSG00000024830	Rps6kb2	chr19	-	4158065	4158363	4158065	4158128	4158609	4158919	87	826027	24616794	2810257	74341203	300	150	0.588795	1	0.143,0.152,0.126	0.159,0.13,0.123	0.003	chr19:4158363-4158610(-)	chr19:4158128-4158610(-)
ENSMUSG00000024851	Pitpnm1	chr19	+	4110841	4110990	4110947	4110990	4110494	4110659	93	356242161	341412	149576307	124633	256	150	0.486693	1	0.86,0.91,0.887	0.879,0.88,0.845	0.018	chr19:4110659-4110842(+)	chr19:4110659-4110948(+)
ENSMUSG00000024851	Pitpnm1	chr19	+	4112661	4112876	4112747	4112876	4112326	4112510	94	482811	1028858	156025	62237106	236	150	0.122888	0.596586	0.23,0.168,0.108	0.133,0.139,0.13	0.035	chr19:4112510-4112662(+)	chr19:4112510-4112748(+)
ENSMUSG00000024908	Ppp6r3	chr19	-	3473768	3473866	3473768	3473815	3478277	3478364	95	933738286	22919786	3491412752	70212158	201	150	0.000545961	0.0198842	0.753,0.737,0.713	0.788,0.833,0.78	-0.066	chr19:3473866-3478278(-)	chr19:3473815-3478278(-)
ENSMUSG00000024908	Ppp6r3	chr19	-	3473768	3473866	3473768	3473815	3484830	3484916	96	430308140	21146	119540330	116	201	150	0.000299264	0.013006	0.939,0.943,0.946	1.0,0.973,0.976	-0.04	chr19:3473866-3484831(-)	chr19:3473815-3484831(-)
ENSMUSG00000024908	Ppp6r3	chr19	-	3526701	3526934	3526701	3526929	3544107	3544255	98	915708268	432923	3151103615	97430	155	150	0.750149	1	0.954,0.959,0.919	0.971,0.935,0.952	-0.009	chr19:3526934-3544108(-)	chr19:3526929-3544108(-)
ENSMUSG00000053477	Tcf4	chr18	+	69564033	69564163	69564036	69564163	69519964	69520026	103	584618	1772	145234	83611	153	150	0.00245366	0.0557417	0.77,0.866,0.898	0.632,0.586,0.752	0.188	chr18:69520026-69564034(+)	chr18:69520026-69564037(+)
ENSMUSG00000053477	Tcf4	chr18	+	69654960	69655037	69654963	69655037	69652393	69652472	104	27321785	17217	67342199	33113	153	150	0.91416	1	0.94,0.91,0.923	0.956,0.915,0.938	-0.012	chr18:69652472-69654961(+)	chr18:69652472-69654964(+)
ENSMUSG00000024539	Ptpn2	chr18	-	67675719	67675886	67675719	67675829	67677709	67677862	105	838540339	440	2731227654	3176	207	150	0.130769	0.612348	0.993,0.99,1.0	0.985,0.981,0.987	0.01	chr18:67675886-67677710(-)	chr18:67675829-67677710(-)
ENSMUSG00000024589	Nedd4l	chr18	+	65155255	65155317	65155259	65155317	65143795	65143846	106	18714873	200	83246121	0	154	150	1	1	0.989,1.0,1.0	1.0,1.0,1.0	-0.004	chr18:65143846-65155256(+)	chr18:65143846-65155260(+)
ENSMUSG00000053877	Srcap	chr7	+	127529134	127529224	127529137	127529224	127528395	127528489	110	453425205	490439171	161581294	124647356	153	150	0.743409	1	0.475,0.487,0.54	0.56,0.468,0.447	0.009	chr7:127528489-127529135(+)	chr7:127528489-127529138(+)
ENSMUSG00000005417	Mprip	chr11	+	59735829	59736064	59735943	59736064	59731507	59731592	112	870740285	762	2971218669	41211	264	150	0.1245	0.600768	0.986,0.986,0.988	0.977,0.983,0.972	0.009	chr11:59731592-59735830(+)	chr11:59731592-59735944(+)
ENSMUSG00000021326	Trim27	chr13	+	21190091	21190124	21190096	21190124	21189854	21189970	113	1169827436	13124	3661644954	9184	155	150	0.878719	1	0.989,0.985,0.991	0.975,0.989,0.996	0.002	chr13:21189970-21190092(+)	chr13:21189970-21190097(+)
ENSMUSG00000030689	Ino80e	chr7	-	126857225	126857342	126857225	126857291	126857675	126857787	115	689429264	22167	2451090637	22227	201	150	0.340687	0.994426	0.959,0.952,0.966	0.989,0.974,0.946	-0.011	chr7:126857342-126857676(-)	chr7:126857291-126857676(-)
ENSMUSG00000030689	Ino80e	chr7	-	126857675	126857787	126857675	126857722	126857873	126857952	119	1122725432	584824	3641536947	2112667	215	150	0.077057	0.460647	0.931,0.913,0.926	0.924,0.895,0.908	0.014	chr7:126857787-126857874(-)	chr7:126857722-126857874(-)
ENSMUSG00000025875	Tspan17	chr13	+	54793194	54793365	54793263	54793365	54792739	54792886	121	362813	0	155132	10	219	150	1	1	1.0,1.0,1.0	1.0,0.972,1.0	0.009	chr13:54792886-54793195(+)	chr13:54792886-54793264(+)
ENSMUSG00000025875	Tspan17	chr13	+	54795410	54795458	54795414	54795458	54795052	54795178	122	672	0	22610	134	154	150	9.55474e-05	0.00626813	1.0,1.0,1.0	0.661,0.894,0.709	0.245	chr13:54795178-54795411(+)	chr13:54795178-54795415(+)
ENSMUSG00000032637	Atxn2l	chr7	-	126496436	126496646	126496436	126496628	126497253	126497364	125	28222184	959793376	80414198	2951216739	168	150	0.361141	1	0.208,0.199,0.166	0.195,0.233,0.193	-0.016	chr7:126496646-126497254(-)	chr7:126496628-126497254(-)
ENSMUSG00000030724	Cd19	chr7	-	126412070	126412181	126412070	126412178	126413390	126413669	126	815	941	147	582	153	150	0.682744	1	0.466,0.197,0.831	0.164,0.329,0.774	0.076	chr7:126412181-126413391(-)	chr7:126412178-126413391(-)
ENSMUSG00000030769	Slc5a11	chr7	+	123265586	123265737	123265656	123265737	123265188	123265296	128	423115	312	122732	54	220	150	0.272406	0.891686	0.905,0.955,0.836	1.0,0.786,0.845	0.022	chr7:123265296-123265587(+)	chr7:123265296-123265657(+)
ENSMUSG00000030663	1110004F10Rik	chr7	+	116103194	116103320	116103210	116103320	116101943	116102004	132	1249340	1223834421	4116896	42117891063	166	150	0.418868	1	0.084,0.092,0.079	0.081,0.078,0.075	0.007	chr7:116102004-116103195(+)	chr7:116102004-116103211(+)
ENSMUSG00000030670	Cyp2r1	chr7	-	114552720	114552876	114552720	114552810	114554590	114554635	134	19103	600	3138	281	216	150	0.0829531	0.480156	0.687,1.0,1.0	0.51,0.53,0.847	0.267	chr7:114552876-114554591(-)	chr7:114552810-114554591(-)
ENSMUSG00000018287	Spag7	chr11	-	70664987	70665076	70664987	70665046	70665296	70665364	136	1057725355	100	3251354889	258	180	150	1	1	0.999,1.0,1.0	0.993,0.996,0.989	0.007	chr11:70665076-70665297(-)	chr11:70665046-70665297(-)
ENSMUSG00000048330	Ric3	chr7	-	109047950	109048096	109047950	109048093	109054364	109054458	137	520	20	130	200	153	150	1	1	1.0,0.495,NA	0.329,1.0,NA	0.083	chr7:109048096-109054365(-)	chr7:109048093-109054365(-)
ENSMUSG00000024424	Ttc39c	chr18	+	12735957	12736018	12735979	12736018	12734886	12734991	138	41	1127946	176	4913885	172	150	0.0266426	0.247496	0.0,0.042,0.019	0.017,0.042,0.058	-0.019	chr18:12734991-12735958(+)	chr18:12734991-12735980(+)
ENSMUSG00000005823	Gpr108	chr17	-	57242940	57243134	57242940	57243113	57244246	57244368	141	252248109	16711352	98373189	82350174	171	150	4.85944e-05	0.00391227	0.57,0.658,0.648	0.512,0.483,0.488	0.131	chr17:57243134-57244247(-)	chr17:57243113-57244247(-)
ENSMUSG00000037032	Apbb1	chr7	-	105565532	105565653	105565532	105565647	105566050	105566178	142	100	302	1	1	156	150	1	1	0.243,NA,0.0	NA,NA,0.49	-0.368	chr7:105565653-105566051(-)	chr7:105565647-105566051(-)
ENSMUSG00000037032	Apbb1	chr7	-	105565532	105565951	105565532	105565647	105566050	105566178	143	100	302	1	1	300	150	1	1	0.143,NA,0.0	NA,NA,0.333	-0.262	chr7:105565951-105566051(-)	chr7:105565647-105566051(-)
ENSMUSG00000044465	Fam160a2	chr7	-	105388778	105388937	105388778	105388924	105389253	105389892	145	1059271	0	51209118	10	163	150	1	1	1.0,1.0,1.0	1.0,0.995,1.0	0.002	chr7:105388937-105389254(-)	chr7:105388924-105389254(-)
ENSMUSG00000050994	Adgb	chr10	-	10449966	10450129	10449966	10450111	10472240	10472314	148	10	0	0	220	168	150	1	1	NA,1.0,NA	0.0,0.0,NA	1	chr10:10450129-10472241(-)	chr10:10450111-10472241(-)
ENSMUSG00000022221	Ripk3	chr14	-	55788237	55788462	55788237	55788364	55788616	55788857	151	14712860	1096	49234126	564	248	150	0.0352921	0.295539	0.899,0.896,0.858	0.856,0.959,0.95	-0.037	chr14:55788462-55788617(-)	chr14:55788364-55788617(-)
ENSMUSG00000031403	Dkc1	chrX	+	75097234	75097369	75097282	75097369	75096833	75096901	155	44308	16841204474	167635	53223991279	198	150	0.1898	0.752803	0.019,0.019,0.013	0.022,0.023,0.02	-0.005	chrX:75096901-75097235(+)	chrX:75096901-75097283(+)
ENSMUSG00000029060	Mib2	chr4	-	155655251	155655439	155655251	155655270	155655521	155656305	156	263230101	140	102354178	10	300	150	0.785211	1	0.992,0.966,1.0	1.0,0.994,1.0	-0.012	chr4:155655439-155655522(-)	chr4:155655270-155655522(-)
ENSMUSG00000099481	Xndc1	chr7	+	102071186	102071361	102071218	102071361	102069896	102069991	158	28924494	301910	95397193	54419	182	150	0.813968	1	0.888,0.914,0.886	0.94,0.881,0.893	-0.009	chr7:102069991-102071187(+)	chr7:102069991-102071219(+)
ENSMUSG00000026921	Egfl7	chr2	+	26590576	26590752	26590656	26590752	26590379	26590495	159	1473	28018289	134	63321254	230	150	0.124168	0.599796	0.032,0.024,0.022	0.0,0.026,0.01	0.014	chr2:26590495-26590577(+)	chr2:26590495-26590657(+)
ENSMUSG00000022098	Bmp1	chr14	-	70486146	70486930	70486146	70486272	70490019	70490200	161	1697	282310	102219	42014	300	150	0.00432695	0.0797445	0.222,0.164,0.259	0.556,0.355,0.404	-0.223	chr14:70486930-70490020(-)	chr14:70486272-70490020(-)
ENSMUSG00000022098	Bmp1	chr14	-	70507998	70508214	70507998	70508177	70508455	70508573	162	682	161714	24	4305	187	150	0.113765	0.571345	0.231,0.274,0.103	0.0,0.051,0.391	0.055	chr14:70508214-70508456(-)	chr14:70508177-70508456(-)
ENSMUSG00000035401	Emsy	chr7	-	98593330	98593810	98593330	98593666	98594751	98595312	167	287260109	130	108364181	111	294	150	0.0330528	0.281932	0.993,0.978,1.0	1.0,0.944,0.989	0.013	chr7:98593810-98594752(-)	chr7:98593666-98594752(-)
ENSMUSG00000041343	Ankrd42	chr7	-	92619547	92619725	92619547	92619683	92623967	92624087	171	200	0	0	201	192	150	1	1	1.0,NA,NA	0.0,NA,0.0	1	chr7:92619725-92623968(-)	chr7:92619683-92623968(-)
ENSMUSG00000039361	Picalm	chr7	+	90191140	90191272	90191155	90191272	90189149	90189257	172	295307123	653536220	140457258	241861586	165	150	0.83799	1	0.291,0.342,0.337	0.346,0.325,0.286	0.004	chr7:90189257-90191141(+)	chr7:90189257-90191156(+)
ENSMUSG00000030035	Wbp1	chr6	-	83120184	83120876	83120184	83120287	83121202	83121559	185	250193126	432430	116389223	216745	300	150	0.703647	1	0.744,0.801,0.677	0.734,0.744,0.712	0.011	chr6:83120876-83121203(-)	chr6:83120287-83121203(-)
ENSMUSG00000030532	Hddc3	chr7	+	80343678	80343956	80343715	80343956	80343565	80343594	189	10	775342	13	3310684	187	150	1	1	0.0,0.015,0.0	0.0,0.008,0.028	-0.007	chr7:80343594-80343679(+)	chr7:80343594-80343716(+)
ENSMUSG00000027752	Exosc8	chr3	-	54732111	54732229	54732111	54732217	54732699	54732745	190	362329	940611395	187331	3681495946	162	150	0.755801	1	0.034,0.034,0.064	0.043,0.043,0.029	0.006	chr3:54732229-54732700(-)	chr3:54732217-54732700(-)
ENSMUSG00000020716	Nf1	chr11	+	79565417	79565551	79565420	79565551	79564823	79564946	193	12312547	361914	2013392	52818	153	150	0.582512	1	0.77,0.866,0.767	0.797,0.823,0.834	-0.017	chr11:79564946-79565418(+)	chr11:79564946-79565421(+)
ENSMUSG00000002289	Angptl4	chr17	-	33780529	33780647	33780529	33780643	33780782	33780893	194	19515658	512	114339226	272	154	150	0.811467	1	0.974,0.993,0.966	0.982,0.979,0.991	-0.006	chr17:33780647-33780783(-)	chr17:33780643-33780783(-)
ENSMUSG00000078671	Chd2	chr7	-	73475343	73475579	73475343	73475493	73478658	73478730	195	294421	18316657	83828	72244140	236	150	0.0509175	0.363391	0.092,0.144,0.19	0.066,0.09,0.113	0.052	chr7:73475579-73478659(-)	chr7:73475493-73478659(-)
ENSMUSG00000000374	Trappc10	chr10	-	78201431	78201590	78201431	78201586	78202879	78203021	196	549411194	1470	174827360	5165	154	150	0.81198	1	0.974,0.983,1.0	0.971,0.981,0.986	0.006	chr10:78201590-78202880(-)	chr10:78201586-78202880(-)
ENSMUSG00000054277	Arfgap3	chr15	-	83310249	83310384	83310249	83310381	83313468	83313612	198	14015960	38188	73228133	164019	153	150	0.910433	1	0.783,0.896,0.88	0.817,0.848,0.873	0.007	chr15:83310384-83313469(-)	chr15:83310381-83313469(-)
ENSMUSG00000079334	Naa80	chr9	+	107582816	107583519	107583135	107583519	107579099	107580935	199	267259138	200	115418312	60	300	150	0.922604	1	0.985,1.0,1.0	1.0,0.972,1.0	0.004	chr9:107580935-107582817(+)	chr9:107580935-107583136(+)
ENSMUSG00000079056	Kcnip3	chr2	-	127465853	127465978	127465853	127465974	127510828	127510994	202	11312478	604123	59241117	339128	154	150	0.824927	1	0.647,0.747,0.768	0.635,0.721,0.803	0.001	chr2:127465978-127510829(-)	chr2:127465974-127510829(-)
ENSMUSG00000032316	Clk3	chr9	-	57753270	57753430	57753270	57753400	57753500	57753595	203	302112	593486249	42911	200688387	180	150	0.114709	0.573422	0.04,0.035,0.039	0.016,0.034,0.023	0.014	chr9:57753430-57753501(-)	chr9:57753400-57753501(-)
ENSMUSG00000024290	Rock1	chr18	-	10116773	10116862	10116773	10116859	10119884	10119945	204	378334140	936832	163578316	2712843	153	150	0.120414	0.58941	0.799,0.828,0.811	0.855,0.816,0.878	-0.037	chr18:10116862-10119885(-)	chr18:10116859-10119885(-)
ENSMUSG00000022983	Scaf4	chr16	-	90242526	90242718	90242526	90242652	90242871	90242958	205	458320153	15714373	111482280	64295157	216	150	0.00273418	0.0600342	0.67,0.608,0.593	0.546,0.532,0.553	0.08	chr16:90242718-90242872(-)	chr16:90242652-90242872(-)
ENSMUSG00000038252	Ncapd2	chr6	-	125186099	125186281	125186099	125186261	125186753	125186812	210	19981427684	695618	57723891524	98342	170	150	0.248196	0.863344	0.962,0.957,0.971	0.983,0.962,0.97	-0.008	chr6:125186281-125186754(-)	chr6:125186261-125186754(-)
ENSMUSG00000030057	Cnbp	chr6	-	87845121	87845323	87845121	87845320	87845464	87845557	212	14931005486	25881899932	55222931345	96041162510	153	150	0.813993	1	0.361,0.342,0.338	0.361,0.353,0.344	-0.006	chr6:87845323-87845465(-)	chr6:87845320-87845465(-)
ENSMUSG00000045180	Shroom2	chrX	-	152617192	152617453	152617192	152617355	152618900	152619446	221	400	421	10	1154	248	150	0.308744	0.950384	0.377,0.0,0.0	0.0,0.039,0.0	0.113	chrX:152617453-152618901(-)	chrX:152617355-152618901(-)
ENSMUSG00000045180	Shroom2	chrX	-	152618900	152619639	152618900	152619446	152623125	152623335	222	40	1342	200	160	300	150	1	1	0.0,0.333,0.0	0.5,0.0,NA	-0.139	chrX:152619639-152623126(-)	chrX:152619446-152623126(-)
ENSMUSG00000045180	Shroom2	chrX	-	152623125	152623335	152623125	152623317	152657423	152657524	223	122	20	1010	43	168	150	1	1	1.0,0.472,1.0	NA,0.691,0.749	0.104	chrX:152623335-152657424(-)	chrX:152623317-152657424(-)
ENSMUSG00000035382	Pcsk7	chr9	+	45925910	45926067	45925917	45926067	45919791	45919894	224	45316	10119	144132	6216	157	150	0.679027	1	0.811,0.729,0.389	0.69,0.651,0.836	-0.083	chr9:45919894-45925911(+)	chr9:45919894-45925918(+)
ENSMUSG00000014402	Tsg101	chr7	-	46908904	46908991	46908904	46908963	46910744	46910810	225	14411056	1066	4617591	5149	178	150	0.409896	1	0.924,0.939,0.887	0.886,0.913,0.895	0.019	chr7:46908991-46910745(-)	chr7:46908963-46910745(-)
ENSMUSG00000014402	Tsg101	chr7	-	46908904	46909068	46908904	46908963	46910744	46910810	226	1017803338	1066	3141300873	5149	255	150	0.69821	1	0.984,0.987,0.971	0.974,0.982,0.983	0.001	chr7:46909068-46910745(-)	chr7:46908963-46910745(-)
ENSMUSG00000014402	Tsg101	chr7	-	46908904	46909068	46908904	46908991	46910744	46910810	227	930720303	452119	2771205803	74413	227	150	0.0135746	0.165236	0.932,0.958,0.913	0.963,0.948,0.976	-0.028	chr7:46909068-46910745(-)	chr7:46908991-46910745(-)
ENSMUSG00000006763	Saal1	chr7	-	46699363	46699552	46699363	46699547	46699635	46701961	233	25018788	572	77381196	1142	155	150	0.664088	1	0.98,0.963,0.977	0.987,0.963,0.99	-0.007	chr7:46699552-46699636(-)	chr7:46699547-46699636(-)
ENSMUSG00000006763	Saal1	chr7	-	46702401	46702517	46702401	46702492	46702620	46702680	234	353247106	10182	112463292	42622	175	150	0.137743	0.632101	0.968,0.922,0.978	0.96,0.939,0.919	0.017	chr7:46702517-46702621(-)	chr7:46702492-46702621(-)
ENSMUSG00000015966	Il17rb	chr14	-	30002362	30003046	30002362	30002414	30003560	30003687	241	303313	1016629	183414	258944	300	150	0.748251	1	0.129,0.2,0.183	0.265,0.16,0.137	-0.017	chr14:30003046-30003561(-)	chr14:30002414-30003561(-)
ENSMUSG00000003190	Bcl2l12	chr7	-	44994362	44994476	44994362	44994449	44996543	44996686	244	141312	31821292	33419	103409247	177	150	0.540239	1	0.036,0.049,0.1	0.024,0.066,0.061	0.011	chr7:44994476-44996544(-)	chr7:44994449-44996544(-)
ENSMUSG00000037336	Mfsd2b	chr12	-	4869534	4869672	4869534	4869658	4870498	4870623	251	29131	29335968	22326	127437303	164	150	0.957602	1	0.083,0.032,0.013	0.014,0.046,0.073	-0.002	chr12:4869672-4870499(-)	chr12:4869658-4870499(-)
ENSMUSG00000042423	Fbrs	chr7	+	127489387	127489595	127489453	127489595	127489166	127489250	253	944632335	17132	2311111572	83819	216	150	0.00140386	0.0388091	0.975,0.971,0.991	0.952,0.953,0.954	0.026	chr7:127489250-127489388(+)	chr7:127489250-127489454(+)
ENSMUSG00000032507	Fbxl2	chr9	-	113983984	113984116	113983984	113984041	113984540	113984585	257	280	1064	0	177	225	150	1	1	0.118,0.471,0.0	NA,0.0,0.0	0.196	chr9:113984116-113984541(-)	chr9:113984041-113984541(-)
ENSMUSG00000033285	Wdr3	chr3	-	100157323	100157442	100157323	100157435	100159765	100159920	259	505399151	2	184714359	104	157	150	1	1	1.0,1.0,0.986	0.994,1.0,0.988	0.001	chr3:100157442-100159766(-)	chr3:100157435-100159766(-)
ENSMUSG00000033285	Wdr3	chr3	-	100159765	100159975	100159765	100159920	100161019	100161222	260	568408193	18107	188881428	111811	205	150	0.760327	1	0.958,0.968,0.953	0.926,0.973,0.966	0.005	chr3:100159975-100161020(-)	chr3:100159920-100161020(-)
ENSMUSG00000020818	Mfsd11	chr11	+	116859298	116859378	116859323	116859378	116858473	116858581	261	21619671	1097	71299156	52416	175	150	0.0685294	0.430687	0.949,0.949,0.897	0.924,0.914,0.893	0.021	chr11:116858581-116859299(+)	chr11:116858581-116859324(+)
ENSMUSG00000020818	Mfsd11	chr11	+	116859298	116859378	116859348	116859378	116858473	116858581	262	26524889	1	82375191	11	200	150	1	1	1.0,1.0,0.985	1.0,0.996,0.993	-0.001	chr11:116858581-116859299(+)	chr11:116858581-116859349(+)
ENSMUSG00000020818	Mfsd11	chr11	+	116859323	116859378	116859348	116859378	116858473	116858581	263	596125	1	1610051	11	175	150	1	1	1.0,1.0,0.955	1.0,0.988,0.978	-0.004	chr11:116858581-116859324(+)	chr11:116858581-116859349(+)
ENSMUSG00000028048	Gba	chr3	+	89207783	89207987	89207823	89207987	89207226	89207451	264	13206	428331191	91220	170717451	190	150	0.294745	0.928667	0.023,0.046,0.024	0.04,0.013,0.034	0.002	chr3:89207451-89207784(+)	chr3:89207451-89207824(+)
ENSMUSG00000032217	Rnf111	chr9	-	70429551	70429679	70429551	70429655	70430930	70431026	267	19316068	22820283	45196122	91377172	174	150	0.00601009	0.101398	0.422,0.406,0.414	0.299,0.309,0.379	0.085	chr9:70429679-70430931(-)	chr9:70429655-70430931(-)
ENSMUSG00000032217	Rnf111	chr9	-	70450285	70450541	70450285	70450538	70453500	70453817	268	17913572	10012345	3820884	3515699	153	150	0.106053	0.55314	0.637,0.518,0.611	0.516,0.567,0.454	0.076	chr9:70450541-70453501(-)	chr9:70450538-70453501(-)
ENSMUSG00000006998	Psmd2	chr16	+	20652151	20652300	20652243	20652300	20651703	20651851	270	462321	24881751843	135847	80932972045	242	150	0.668323	1	0.011,0.008,0.015	0.01,0.011,0.014	0	chr16:20651851-20652152(+)	chr16:20651851-20652244(+)
ENSMUSG00000001750	Tcirg1	chr19	-	3898547	3898875	3898547	3898638	3898979	3899119	272	14251096615	33153	51222251171	31917	300	150	0.0423795	0.330201	0.956,0.973,0.99	0.988,0.983,0.972	-0.008	chr19:3898875-3898980(-)	chr19:3898638-3898980(-)
ENSMUSG00000066571	4931406P16Rik	chr7	-	34240508	34240646	34240508	34240640	34242239	34242405	275	799129	210	269286	2	156	150	1	1	0.974,0.989,1.0	1.0,1.0,0.976	-0.004	chr7:34240646-34242240(-)	chr7:34240640-34242240(-)
ENSMUSG00000001248	Gramd1a	chr7	-	31142550	31142654	31142550	31142575	31142803	31142888	277	713631299	13195	2131034603	2617	229	150	0.0598165	0.39956	0.973,0.956,0.975	0.986,0.991,0.959	-0.011	chr7:31142654-31142804(-)	chr7:31142575-31142804(-)
ENSMUSG00000036570	Fxyd1	chr7	-	31051681	31051815	31051681	31051780	31051932	31051987	278	110	0	30	2	185	150	1	1	1.0,1.0,NA	NA,1.0,0.0	0.5	chr7:31051815-31051933(-)	chr7:31051780-31051933(-)
ENSMUSG00000058239	Usf2	chr7	-	30946750	30946879	30946750	30946855	30946964	30947059	279	562352179	100	173697461	0	174	150	1	1	0.998,1.0,1.0	1.0,1.0,1.0	-0.001	chr7:30946879-30946965(-)	chr7:30946855-30946965(-)
ENSMUSG00000078762	Haus5	chr7	-	30656948	30657078	30656948	30657017	30657161	30657273	281	566465236	436	273833459	2121	211	150	0.900437	1	0.99,0.991,0.965	0.99,0.98,0.997	-0.007	chr7:30657078-30657162(-)	chr7:30657017-30657162(-)
ENSMUSG00000019737	Syne4	chr7	+	30316229	30316373	30316294	30316373	30315261	30315400	291	733	110	3186	20	215	150	1	1	0.83,0.677,1.0	1.0,0.863,1.0	-0.119	chr7:30315400-30316230(+)	chr7:30315400-30316295(+)
ENSMUSG00000037020	Wdr62	chr7	-	30242745	30242935	30242745	30242877	30243042	30243141	295	27198	424823	21821	246943	208	150	0.09474	0.522919	0.317,0.222,0.201	0.057,0.158,0.26	0.088	chr7:30242935-30243043(-)	chr7:30242877-30243043(-)
ENSMUSG00000033111	3830406C13Rik	chr14	+	12285384	12285468	12285387	12285468	12284253	12284333	298	292915	11114	165924	5226	153	150	0.882355	1	0.721,0.721,0.786	0.758,0.724,0.797	-0.017	chr14:12284333-12285385(+)	chr14:12284333-12285388(+)
ENSMUSG00000026307	Scly	chr1	+	91302768	91302869	91302772	91302869	91300527	91300640	302	427347145	111711	157663325	3427	154	150	0.831161	1	0.974,0.952,0.928	0.981,0.939,0.978	-0.015	chr1:91300640-91302769(+)	chr1:91300640-91302773(+)
ENSMUSG00000026307	Scly	chr1	+	91308292	91308441	91308313	91308441	91305273	91305454	303	320	327230135	83	64465220	171	150	0.809951	1	0.008,0.008,0.0	0.0,0.015,0.012	-0.004	chr1:91305454-91308293(+)	chr1:91305454-91308314(+)
ENSMUSG00000030589	Rasgrp4	chr7	+	29142965	29143139	29142995	29143139	29140487	29140641	305	1115156	710	4219589	30	180	150	0.0503937	0.362682	0.93,0.977,1.0	1.0,0.982,1.0	-0.025	chr7:29140641-29142966(+)	chr7:29140641-29142996(+)
ENSMUSG00000030589	Rasgrp4	chr7	+	29149921	29150056	29149943	29150056	29149798	29149835	309	1225239	1312	5219987	1120	172	150	0.0998601	0.537514	0.891,0.978,0.944	0.978,0.935,1.0	-0.033	chr7:29149835-29149922(+)	chr7:29149835-29149944(+)
ENSMUSG00000020737	Jpt1	chr11	-	115500665	115500723	115500665	115500684	115502004	115502102	311	854629	19291164674	229648	63626201602	189	150	0.129184	0.61034	0.034,0.03,0.033	0.027,0.028,0.023	0.006	chr11:115500723-115502005(-)	chr11:115500684-115502005(-)
ENSMUSG00000052369	Tmem106c	chr15	+	97966068	97966310	97966246	97966310	97964839	97965030	313	252916	286228105	102834	97424239	300	150	0.403255	1	0.042,0.06,0.071	0.049,0.032,0.066	0.009	chr15:97965030-97966069(+)	chr15:97965030-97966247(+)
ENSMUSG00000053158	Fes	chr7	-	80379610	80379734	80379610	80379704	80379817	80379912	315	22011472833	595719	71831071560	1910251	180	150	0.698878	1	0.969,0.956,0.973	0.969,0.962,0.962	0.002	chr7:80379734-80379818(-)	chr7:80379704-80379818(-)
ENSMUSG00000053158	Fes	chr7	-	80382312	80382396	80382312	80382390	80382520	80382707	317	1181750479	591417	4101704898	125550	156	150	0.649834	1	0.951,0.981,0.964	0.97,0.968,0.945	0.004	chr7:80382396-80382521(-)	chr7:80382390-80382521(-)
ENSMUSG00000053158	Fes	chr7	-	80382312	80382431	80382312	80382390	80382520	80382707	318	485334163	591417	169634399	125550	191	150	0.614174	1	0.866,0.949,0.883	0.917,0.901,0.862	0.006	chr7:80382431-80382521(-)	chr7:80382390-80382521(-)
ENSMUSG00000053158	Fes	chr7	-	80382312	80382431	80382312	80382396	80382520	80382707	319	408287137	1104703453	136491322	3771561821	185	150	0.771826	1	0.231,0.249,0.197	0.226,0.203,0.241	0.002	chr7:80382431-80382521(-)	chr7:80382396-80382521(-)
ENSMUSG00000030560	Ctsc	chr7	+	88281386	88281532	88281389	88281532	88278133	88278374	322	603321179	402	168805416	70	153	150	1	1	0.993,1.0,0.989	1.0,0.991,1.0	-0.003	chr7:88278374-88281387(+)	chr7:88278374-88281390(+)
ENSMUSG00000038690	Atp5j2	chr5	-	145188192	145188322	145188192	145188258	145191502	145191592	326	34227	630	51914	596	214	150	0.00281431	0.061109	0.799,0.837,1.0	0.412,0.597,0.621	0.335	chr5:145188322-145191503(-)	chr5:145188258-145191503(-)
ENSMUSG00000002249	Tead3	chr17	-	28333505	28333679	28333505	28333674	28333790	28333936	327	441	0	121	10	155	150	1	1	1.0,1.0,1.0	1.0,0.659,1.0	0.114	chr17:28333679-28333791(-)	chr17:28333674-28333791(-)
ENSMUSG00000059743	Fdps	chr3	-	89094451	89094577	89094451	89094529	89094859	89094932	330	423720	1175664433	66044	39619271113	198	150	0.0518139	0.36637	0.026,0.041,0.034	0.011,0.023,0.029	0.013	chr3:89094577-89094860(-)	chr3:89094529-89094860(-)
ENSMUSG00000005442	Cic	chr7	+	25291051	25291342	25291054	25291342	25290798	25290965	331	14312555	16810961	42258129	4325595	153	150	0.306569	0.949828	0.455,0.529,0.469	0.489,0.498,0.571	-0.035	chr7:25290965-25291052(+)	chr7:25290965-25291055(+)
ENSMUSG00000005442	Cic	chr7	+	25292413	25292568	25292416	25292568	25292063	25292314	332	306306168	18714979	111587307	47271136	153	150	0.176786	0.729372	0.616,0.668,0.676	0.698,0.68,0.689	-0.036	chr7:25292314-25292414(+)	chr7:25292314-25292417(+)
ENSMUSG00000040940	Arhgef1	chr7	+	24912056	24912352	24912309	24912352	24908310	24908424	335	1197897505	9100	4181700932	496	300	150	0.700235	1	0.985,0.978,1.0	0.981,0.99,0.987	0.002	chr7:24908424-24912057(+)	chr7:24908424-24912310(+)
ENSMUSG00000040940	Arhgef1	chr7	+	24916800	24916941	24916803	24916941	24916017	24916053	336	1338903581	1267956	5081828973	53165115	153	150	0.395085	1	0.912,0.918,0.91	0.904,0.916,0.892	0.009	chr7:24916053-24916801(+)	chr7:24916053-24916804(+)
ENSMUSG00000040940	Arhgef1	chr7	+	24918519	24919351	24919183	24919351	24917894	24918000	337	825540269	13811457	3101010635	44173127	300	150	0.42291	1	0.749,0.703,0.702	0.779,0.745,0.714	-0.028	chr7:24918000-24918520(+)	chr7:24918000-24919184(+)
ENSMUSG00000035189	Ano4	chr10	-	89084546	89084653	89084546	89084591	89088192	89088293	339	10	120	10	211	212	150	1	1	0.0,0.261,NA	0.0,0.414,0.0	-0.007	chr10:89084653-89088193(-)	chr10:89084591-89088193(-)
ENSMUSG00000016253	Nelfcd	chr2	+	174423003	174423204	174423051	174423204	174422566	174422674	343	341711	595447217	83711	215838418	198	150	0.207775	0.78935	0.041,0.028,0.037	0.027,0.032,0.02	0.009	chr2:174422674-174423004(+)	chr2:174422674-174423052(+)
ENSMUSG00000020056	Washc3	chr10	+	88215966	88216074	88215982	88216074	88213646	88213712	344	534334157	0	153723482	20	166	150	1	1	1.0,1.0,1.0	1.0,0.997,1.0	0.001	chr10:88213712-88215967(+)	chr10:88213712-88215983(+)
ENSMUSG00000020056	Washc3	chr10	+	88219249	88219360	88219252	88219360	88215966	88216074	345	397283146	1216933	137572347	3414388	153	150	0.687421	1	0.763,0.801,0.813	0.798,0.797,0.794	-0.004	chr10:88216074-88219250(+)	chr10:88216074-88219253(+)
ENSMUSG00000023852	Chd1	chr17	+	15760305	15760450	15760327	15760450	15758581	15758732	346	18176	625452208	63413	189856449	172	150	0.660716	1	0.025,0.032,0.025	0.027,0.033,0.025	-0.001	chr17:15758732-15760306(+)	chr17:15758732-15760328(+)
ENSMUSG00000002985	Apoe	chr7	-	19698187	19698272	19698187	19698253	19699010	19699052	348	448627	7761001254	116055	3141127689	169	150	0.0634759	0.41201	0.048,0.071,0.086	0.03,0.045,0.066	0.021	chr7:19698272-19699011(-)	chr7:19698253-19699011(-)
ENSMUSG00000002981	Clptm1	chr7	-	19662144	19662342	19662144	19662233	19664933	19664955	351	363512	600	197940	32	259	150	0.484302	1	0.777,1.0,1.0	1.0,0.938,0.921	-0.027	chr7:19662342-19664934(-)	chr7:19662233-19664934(-)
ENSMUSG00000002043	Trappc6a	chr7	+	19515006	19515090	19515024	19515090	19514421	19514539	352	699472259	14359	204993528	115026	168	150	0.254563	0.869205	0.978,0.923,0.963	0.943,0.947,0.948	0.009	chr7:19514539-19515007(+)	chr7:19514539-19515025(+)
ENSMUSG00000003549	Ercc1	chr7	+	19352628	19352705	19352632	19352705	19350692	19350792	354	1707675	300	42204125	2	154	150	1	1	0.982,1.0,1.0	1.0,1.0,0.984	-0.001	chr7:19350792-19352629(+)	chr7:19350792-19352633(+)
ENSMUSG00000030409	Dmpk	chr7	+	19092417	19092632	19092546	19092632	19091938	19092254	356	251	400	634	17	279	150	0.219995	0.810887	0.212,1.0,1.0	1.0,0.617,0.235	0.12	chr7:19092254-19092418(+)	chr7:19092254-19092547(+)
ENSMUSG00000030409	Dmpk	chr7	+	19092417	19092632	19092542	19092632	19092207	19092254	357	251	300	634	20	275	150	0.431748	1	0.267,1.0,1.0	1.0,0.45,1.0	-0.061	chr7:19092254-19092418(+)	chr7:19092254-19092543(+)
ENSMUSG00000030409	Dmpk	chr7	+	19092542	19092632	19092546	19092632	19092207	19092254	358	300	400	20	17	154	150	1	1	0.422,NA,NA	NA,0.661,0.0	0.091	chr7:19092254-19092543(+)	chr7:19092254-19092547(+)
ENSMUSG00000078485	Plekhn1	chr4	-	156222250	156222478	156222250	156222389	156222639	156222780	359	817234	0	4414769	201	239	150	1	1	1.0,1.0,1.0	0.932,1.0,0.977	0.03	chr4:156222478-156222640(-)	chr4:156222389-156222640(-)
ENSMUSG00000078485	Plekhn1	chr4	-	156222250	156222481	156222250	156222389	156222639	156222780	360	384317	0	238145	201	242	150	0.91256	1	1.0,1.0,1.0	0.877,1.0,0.965	0.053	chr4:156222481-156222640(-)	chr4:156222389-156222640(-)
ENSMUSG00000078485	Plekhn1	chr4	-	156222250	156222481	156222250	156222478	156222639	156222780	361	592	463819	3199	248533	153	150	0.252169	0.868089	0.096,0.188,0.094	0.109,0.18,0.211	-0.041	chr4:156222481-156222640(-)	chr4:156222478-156222640(-)
ENSMUSG00000040987	Mill2	chr7	+	18856311	18856681	18856405	18856681	18855939	18856203	362	240	140	0	200	244	150	1	1	0.551,0.381,NA	0.0,NA,NA	0.466	chr7:18856203-18856312(+)	chr7:18856203-18856406(+)
ENSMUSG00000001729	Akt1	chr12	-	112662179	112662334	112662179	112662308	112671515	112671654	364	634013	18871196701	186431	56926361567	176	150	0.151723	0.671416	0.028,0.028,0.016	0.026,0.02,0.017	0.003	chr12:112662334-112671516(-)	chr12:112662308-112671516(-)
ENSMUSG00000003099	Ppp5c	chr7	-	17008613	17009058	17008613	17008712	17009874	17009996	367	1026730359	553212	3281414836	93821	300	150	0.00186777	0.0460818	0.903,0.919,0.937	0.948,0.949,0.952	-0.03	chr7:17009058-17009875(-)	chr7:17008712-17009875(-)
ENSMUSG00000039221	Rpl22l1	chr3	+	28806669	28806858	28806736	28806858	28806499	28806592	370	294335142	619145562298	204609331	2443101496647	217	150	0.744362	1	0.032,0.048,0.041	0.055,0.04,0.033	-0.002	chr3:28806592-28806670(+)	chr3:28806592-28806737(+)
ENSMUSG00000025137	Pcyt2	chr11	-	120613640	120613774	120613640	120613725	120614330	120614397	372	382616	28817294	73520	115336241	199	150	0.01201	0.153563	0.09,0.102,0.114	0.044,0.073,0.059	0.043	chr11:120613774-120614331(-)	chr11:120613725-120614331(-)
ENSMUSG00000111497	Gm38431	chr9	-	21080083	21080171	21080083	21080168	21080704	21080817	374	632389249	461326	182917498	47236	153	150	0.881488	1	0.931,0.967,0.904	0.978,0.926,0.931	-0.011	chr9:21080171-21080705(-)	chr9:21080168-21080705(-)
ENSMUSG00000055204	Ankrd17	chr5	-	90278242	90278391	90278242	90278388	90282850	90283603	375	25720588	454119	70275152	94836	153	150	0.892269	1	0.848,0.831,0.82	0.884,0.849,0.805	-0.013	chr5:90278391-90282851(-)	chr5:90278388-90282851(-)
ENSMUSG00000040282	BC052040	chr2	+	115687045	115687169	115687063	115687169	115686384	115686450	377	710	906832	143	3510360	168	150	0.678884	1	0.065,0.013,0.0	0.025,0.034,0.043	-0.008	chr2:115686450-115687046(+)	chr2:115686450-115687064(+)
ENSMUSG00000023707	Ogfod2	chr5	+	124114064	124114645	124114387	124114645	124113428	124113528	414	12711643	442415	53234126	94226	300	150	0.0388021	0.31294	0.591,0.707,0.589	0.746,0.736,0.708	-0.101	chr5:124113528-124114065(+)	chr5:124113528-124114388(+)
ENSMUSG00000023707	Ogfod2	chr5	+	124114064	124114645	124114478	124114645	124113428	124113528	415	23619882	762	78402211	1172	300	150	0.862831	1	0.944,0.943,0.953	0.975,0.922,0.981	-0.013	chr5:124113528-124114065(+)	chr5:124113528-124114479(+)
ENSMUSG00000023707	Ogfod2	chr5	+	124114387	124114645	124114478	124114645	124113428	124113528	416	17411757	762	41230130	1172	241	150	0.682756	1	0.939,0.924,0.947	0.962,0.894,0.976	-0.007	chr5:124113528-124114388(+)	chr5:124113528-124114479(+)
ENSMUSG00000023707	Ogfod2	chr5	+	124114387	124114645	124114478	124114645	124114064	124114192	417	25319989	16145	88400217	114618	241	150	0.0209823	0.213973	0.908,0.898,0.917	0.833,0.844,0.882	0.055	chr5:124114192-124114388(+)	chr5:124114192-124114479(+)
ENSMUSG00000002103	Acp2	chr2	+	91204227	91204326	91204239	91204326	91203600	91203696	418	1965	22515678	9226	68379153	162	150	0.935828	1	0.073,0.034,0.056	0.109,0.051,0.035	-0.011	chr2:91203696-91204228(+)	chr2:91203696-91204240(+)
ENSMUSG00000110195	Pde2a	chr7	+	101503286	101503410	101503298	101503410	101502811	101502942	421	683636	599363287	1412353	1981008540	162	150	0.693434	1	0.095,0.084,0.104	0.061,0.102,0.083	0.012	chr7:101502942-101503287(+)	chr7:101502942-101503299(+)
ENSMUSG00000078681	Tm2d3	chr7	+	65695142	65695327	65695169	65695327	65693850	65693943	422	14112459	9125	60171104	6145	177	150	0.805232	1	0.93,0.898,0.909	0.894,0.912,0.946	-0.005	chr7:65693943-65695143(+)	chr7:65693943-65695170(+)
ENSMUSG00000024072	Yipf4	chr17	+	74492326	74492505	74492345	74492505	74489492	74489794	424	12116	25819493	32112	88382234	169	150	0.90774	1	0.04,0.048,0.054	0.029,0.047,0.044	0.007	chr17:74489794-74492327(+)	chr17:74489794-74492346(+)
ENSMUSG00000027284	Cdan1	chr2	-	120720881	120721010	120720881	120720989	120722609	120722758	429	642	13712768	173	45234105	171	150	0.59955	1	0.037,0.027,0.025	0.019,0.026,0.024	0.007	chr2:120721010-120722610(-)	chr2:120720989-120722610(-)
ENSMUSG00000034675	Dbn1	chr13	-	55474455	55474561	55474455	55474558	55474859	55475536	432	1311	24154	492	5317	153	150	0.716286	1	0.347,0.061,0.197	0.44,0.222,0.219	-0.092	chr13:55474561-55474860(-)	chr13:55474558-55474860(-)
ENSMUSG00000034675	Dbn1	chr13	-	55476145	55476773	55476145	55476316	55477550	55477680	433	320	14196	2	7227	300	150	0.27748	0.898628	0.097,0.05,0.0	0.0,0.0,0.125	0.007	chr13:55476773-55477551(-)	chr13:55476316-55477551(-)
ENSMUSG00000042345	Ubash3a	chr17	+	31215036	31215235	31215146	31215235	31213731	31213918	435	906706313	223	2961323626	425	260	150	0.929723	1	0.996,0.995,0.984	0.977,0.997,0.986	0.005	chr17:31213918-31215037(+)	chr17:31213918-31215147(+)
ENSMUSG00000064179	Tnnt1	chr7	-	4508473	4508625	4508473	4508583	4509010	4509124	437	1472	1468342	2315	41193115	192	150	0.265103	0.883622	0.07,0.062,0.036	0.037,0.012,0.092	0.009	chr7:4508625-4509011(-)	chr7:4508583-4509011(-)
ENSMUSG00000019254	Ppp1r12c	chr7	-	4483102	4483188	4483102	4483185	4483340	4483401	442	1376527	512394169	3914874	227655408	153	150	0.797822	1	0.208,0.139,0.135	0.144,0.181,0.151	0.002	chr7:4483188-4483341(-)	chr7:4483185-4483341(-)
ENSMUSG00000035545	Leng8	chr7	+	4143258	4143697	4143418	4143697	4142833	4143037	444	17012868	227217103	66261141	67286123	300	150	0.00148962	0.0397101	0.272,0.228,0.248	0.33,0.313,0.364	-0.086	chr7:4143037-4143259(+)	chr7:4143037-4143419(+)
ENSMUSG00000022299	Slc25a32	chr15	-	39098128	39098242	39098128	39098197	39099872	39100033	445	22615846	732	72310158	135	195	150	0.695361	1	0.961,0.976,0.947	1.0,0.948,0.96	-0.008	chr15:39098242-39099873(-)	chr15:39098197-39099873(-)
ENSMUSG00000039976	Tbc1d16	chr11	-	119156642	119156810	119156642	119156807	119157739	119157887	449	212015	213415	73318	127019	153	150	0.323323	0.9666	0.495,0.366,0.495	0.364,0.316,0.482	0.065	chr11:119156810-119157740(-)	chr11:119156807-119157740(-)
ENSMUSG00000030982	Vps35l	chr7	+	118743594	118743694	118743609	118743694	118740746	118740775	450	281236130	200	110468260	0	165	150	1	1	0.992,1.0,1.0	1.0,1.0,1.0	-0.003	chr7:118740775-118743595(+)	chr7:118740775-118743610(+)
ENSMUSG00000003531	Dgcr6	chr16	+	18070081	18070231	18070090	18070231	18069423	18069524	451	503521	14810460	148833	47219150	159	150	0.674006	1	0.242,0.241,0.248	0.219,0.275,0.172	0.022	chr16:18069524-18070082(+)	chr16:18069524-18070091(+)
ENSMUSG00000030304	Ergic2	chr6	-	148188032	148188130	148188032	148188100	148189485	148189584	453	604411215	42195	206897451	113716	180	150	0.239239	0.844284	0.923,0.947,0.973	0.94,0.953,0.959	-0.003	chr6:148188130-148189486(-)	chr6:148188100-148189486(-)
ENSMUSG00000041540	Sox5	chr6	-	143960796	143960920	143960796	143960917	144023168	144023237	455	0	432	2	210	153	150	0.319564	0.962829	0.0,0.0,0.0	0.0,0.0,1.0	-0.333	chr6:143960920-144023169(-)	chr6:143960917-144023169(-)
ENSMUSG00000030231	Plekha5	chr6	+	140579426	140579476	140579429	140579476	140577226	140577338	456	420	343119	274	137149	153	150	0.257534	0.873336	0.103,0.059,0.0	0.131,0.088,0.074	-0.044	chr6:140577338-140579427(+)	chr6:140577338-140579430(+)
ENSMUSG00000030231	Plekha5	chr6	+	140593554	140597110	140596248	140597110	140591627	140591764	457	503021	450	185925	98	300	150	0.240647	0.846228	0.862,0.75,1.0	1.0,0.766,0.61	0.079	chr6:140591764-140593555(+)	chr6:140591764-140596249(+)
ENSMUSG00000026017	Carf	chr1	+	60109221	60109449	60109326	60109449	60108082	60108200	468	284010	684523	73425	215429	255	150	0.774119	1	0.195,0.343,0.204	0.164,0.27,0.336	-0.009	chr1:60108200-60109222(+)	chr1:60108200-60109327(+)
ENSMUSG00000015461	Atf6b	chr17	+	34648218	34648297	34648229	34648297	34647659	34647739	469	1029690390	20	3451563846	2	161	150	1	1	1.0,0.997,1.0	1.0,1.0,0.997	0	chr17:34647739-34648219(+)	chr17:34647739-34648230(+)
ENSMUSG00000045679	Pqlc3	chr12	-	16992277	16993573	16992277	16992319	16995613	16995671	471	21410882	726428	64316166	118343	300	150	0.00902725	0.13252	0.598,0.458,0.594	0.744,0.656,0.659	-0.136	chr12:16993573-16995614(-)	chr12:16992319-16995614(-)
ENSMUSG00000045679	Pqlc3	chr12	-	16997633	16997703	16997633	16997656	16997773	16997856	472	382212152	0	127498276	10	197	150	1	1	1.0,1.0,1.0	1.0,0.997,1.0	0.001	chr12:16997703-16997774(-)	chr12:16997656-16997774(-)
ENSMUSG00000030309	Caprin2	chr6	-	148842492	148843398	148842492	148843054	148845171	148845235	473	746414	20	138149	0	300	150	1	1	1.0,0.941,1.0	1.0,1.0,1.0	-0.02	chr6:148843398-148845172(-)	chr6:148843054-148845172(-)
ENSMUSG00000030149	Klrk1	chr6	-	129616296	129616350	129616296	129616332	129616668	129616773	474	400	484915	11	234742	168	150	0.516385	1	0.069,0.0,0.0	0.0,0.019,0.021	0.01	chr6:129616350-129616669(-)	chr6:129616332-129616669(-)
ENSMUSG00000050241	Klre1	chr6	+	129581864	129582103	129582001	129582103	129579917	129580117	475	11	500	22	265	287	150	0.0635856	0.412139	0.0,1.0,1.0	0.0,0.148,0.173	0.56	chr6:129580117-129581865(+)	chr6:129580117-129582002(+)
ENSMUSG00000030154	Klrb1f	chr6	+	129053711	129053866	129053790	129053866	129053182	129053257	477	23013494	1564	81372163	43215	229	150	0.0811813	0.47518	0.909,0.936,0.939	0.93,0.884,0.877	0.031	chr6:129053257-129053712(+)	chr6:129053257-129053791(+)
ENSMUSG00000051910	Sox6	chr7	-	115550009	115550159	115550009	115550156	115580564	115580644	478	204	0	55	2	153	150	1	1	1.0,NA,1.0	NA,1.0,0.71	0.145	chr7:115550159-115580565(-)	chr7:115550156-115580565(-)
ENSMUSG00000051910	Sox6	chr7	-	115597495	115597619	115597495	115597616	115659515	115659584	479	100	0	10	21	153	150	1	1	1.0,NA,NA	NA,0.329,0.0	0.836	chr7:115597619-115659516(-)	chr7:115597616-115659516(-)
ENSMUSG00000032366	Tpm1	chr9	-	67022592	67024565	67022592	67023441	67031028	67031098	480	594910	445277130	125120	173491293	300	150	0.00591402	0.100516	0.062,0.081,0.037	0.034,0.049,0.033	0.021	chr9:67024565-67031029(-)	chr9:67023441-67031029(-)
ENSMUSG00000037997	Parp11	chr6	+	127470701	127470830	127470704	127470830	127468031	127468152	484	14011150	27286	50219151	113918	153	150	0.344687	0.99601	0.836,0.795,0.891	0.817,0.846,0.892	-0.011	chr6:127468152-127470702(+)	chr6:127468152-127470705(+)
ENSMUSG00000030346	Rad51ap1	chr6	-	126927537	126927690	126927537	126927687	126928140	126928227	485	336214126	19616887	112426311	87273178	153	150	0.676341	1	0.627,0.555,0.587	0.558,0.605,0.631	-0.008	chr6:126927690-126928141(-)	chr6:126927687-126928141(-)
ENSMUSG00000029592	Usp30	chr5	+	114111868	114111914	114111871	114111914	114111116	114111215	488	594330	19196	299559	95527	153	150	0.131398	0.614664	0.753,0.689,0.831	0.76,0.629,0.682	0.067	chr5:114111215-114111869(+)	chr5:114111215-114111872(+)
ENSMUSG00000063870	Chd4	chr6	+	125100777	125100993	125100798	125100993	125100467	125100589	491	885789337	13431127422	2821148559	4311687869	171	150	0.433269	1	0.366,0.38,0.412	0.365,0.374,0.361	0.019	chr6:125100589-125100778(+)	chr6:125100589-125100799(+)
ENSMUSG00000063870	Chd4	chr6	+	125102431	125102610	125102470	125102610	125102162	125102298	492	20631757747	921818304	57523041190	3401378736	189	150	0.000629961	0.0218503	0.64,0.63,0.661	0.573,0.57,0.562	0.075	chr6:125102298-125102432(+)	chr6:125102298-125102471(+)
ENSMUSG00000030330	Ing4	chr6	+	125047478	125047587	125047481	125047587	125047210	125047325	495	18187	26522591	46433	102398251	153	150	0.00777833	0.120677	0.062,0.073,0.07	0.037,0.136,0.114	-0.027	chr6:125047325-125047479(+)	chr6:125047325-125047482(+)
ENSMUSG00000030330	Ing4	chr6	+	125047792	125047940	125047901	125047940	125047481	125047587	496	503446245	423413	2291005597	104022	259	150	0.000633274	0.0218503	0.874,0.884,0.916	0.93,0.936,0.94	-0.044	chr6:125047587-125047793(+)	chr6:125047587-125047902(+)
ENSMUSG00000023191	P3h3	chr6	-	124850917	124850985	124850917	124850983	124851078	124851131	500	17239	0	7349	1	152	150	1	1	1.0,1.0,1.0	1.0,1.0,0.899	0.034	chr6:124850985-124851079(-)	chr6:124850983-124851079(-)
ENSMUSG00000023191	P3h3	chr6	-	124854310	124854452	124854310	124854447	124854847	124854979	501	20	17234	10	122923	155	150	1	1	0.0,0.078,0.0	0.0,0.032,0.0	0.015	chr6:124854452-124854848(-)	chr6:124854447-124854848(-)
ENSMUSG00000005069	Pex5	chr6	-	124404132	124404243	124404132	124404222	124404629	124404720	504	16715179	300	67213128	1	171	150	1	1	0.98,1.0,1.0	1.0,1.0,0.991	-0.004	chr6:124404243-124404630(-)	chr6:124404222-124404630(-)
ENSMUSG00000005069	Pex5	chr6	-	124413568	124413790	124413568	124413701	124414006	124414042	505	627321	400341150	265356	122536315	239	150	0.212547	0.798834	0.089,0.118,0.081	0.118,0.058,0.1	0.004	chr6:124413790-124414007(-)	chr6:124413701-124414007(-)
ENSMUSG00000040613	Apobec1	chr6	-	122591086	122591260	122591086	122591204	122596631	122596777	508	17228	17712370	64713	56216139	206	150	0.330857	0.980656	0.065,0.115,0.077	0.072,0.137,0.064	-0.005	chr6:122591260-122596632(-)	chr6:122591204-122596632(-)
ENSMUSG00000028854	Slc9a1	chr4	+	133419924	133419995	133419946	133419995	133419453	133419543	510	357320136	1263	149479241	10199	172	150	0.0443083	0.336937	0.963,0.979,0.975	0.929,0.956,0.959	0.024	chr4:133419543-133419925(+)	chr4:133419543-133419947(+)
ENSMUSG00000040669	Phc1	chr6	-	122332521	122332677	122332521	122332653	122333290	122333440	511	393614	201	54231	100	174	150	0.387959	1	0.944,1.0,0.923	0.812,1.0,1.0	0.018	chr6:122332677-122333291(-)	chr6:122332653-122333291(-)
ENSMUSG00000037552	Plekhg2	chr7	-	28370237	28370497	28370237	28370494	28371114	28371245	513	7100	1283	3192	1139	153	150	0.514903	1	0.364,0.551,0.0	0.746,0.589,0.179	-0.2	chr7:28370497-28371115(-)	chr7:28370494-28371115(-)
ENSMUSG00000037552	Plekhg2	chr7	-	28370237	28371042	28370237	28370494	28371114	28371245	514	7187	1283	21112	1139	300	150	0.615982	1	0.226,0.529,0.538	0.5,0.297,0.4	0.032	chr7:28371042-28371115(-)	chr7:28370494-28371115(-)
ENSMUSG00000037552	Plekhg2	chr7	-	28370237	28371042	28370237	28370497	28371114	28371245	515	7207	7100	2811	3161	300	150	0.39108	1	0.333,0.5,1.0	0.25,0.2,0.846	0.179	chr7:28371042-28371115(-)	chr7:28370497-28371115(-)
ENSMUSG00000041498	Kif14	chr1	+	136490199	136490384	136490206	136490384	136487403	136487467	517	21516793	40	68295125	0	157	150	1	1	1.0,0.976,1.0	1.0,1.0,1.0	-0.008	chr1:136487467-136490200(+)	chr1:136487467-136490207(+)
ENSMUSG00000067825	Pex26	chr6	+	121193511	121196185	121193514	121196185	121190100	121190247	518	875823	16114	3011574	101315	153	150	0.958268	1	0.842,0.838,0.849	0.746,0.897,0.829	0.019	chr6:121190247-121193512(+)	chr6:121190247-121193515(+)
ENSMUSG00000026939	Tmem141	chr2	-	25621065	25621173	25621065	25621167	25621374	25621458	519	846642	0	2916287	10	156	150	1	1	1.0,1.0,1.0	1.0,0.994,1.0	0.002	chr2:25621173-25621375(-)	chr2:25621167-25621375(-)
ENSMUSG00000030166	Rad52	chr6	+	119922471	119922823	119922474	119922823	119920806	119921028	520	1016832	11124	42162110	11813	153	150	0.376827	1	0.9,0.847,0.887	0.976,0.898,0.892	-0.044	chr6:119921028-119922472(+)	chr6:119921028-119922475(+)
ENSMUSG00000041477	Dcp1b	chr6	+	119217802	119217979	119217901	119217979	119214769	119215606	521	14211872	522	58209100	265	249	150	0.440191	1	0.945,0.973,0.956	0.946,0.955,0.923	0.017	chr6:119215606-119217803(+)	chr6:119215606-119217902(+)
ENSMUSG00000025701	Alox5	chr6	-	116413737	116413916	116413737	116413820	116414522	116414609	528	606298234	202	222900433	0	246	150	1	1	0.995,1.0,0.986	1.0,1.0,1.0	-0.006	chr6:116413916-116414523(-)	chr6:116413820-116414523(-)
ENSMUSG00000030123	Plxnd1	chr6	-	115967748	115967888	115967748	115967786	115967970	115968070	529	840637390	200	3211106654	220	252	150	1	1	0.996,1.0,1.0	0.99,0.997,1.0	0.003	chr6:115967888-115967971(-)	chr6:115967786-115967971(-)
ENSMUSG00000025316	Banp	chr8	+	121978554	121978754	121978578	121978754	121975899	121975991	530	22121990	500	42369138	1	174	150	1	1	0.974,1.0,1.0	1.0,1.0,0.992	-0.006	chr8:121975991-121978555(+)	chr8:121975991-121978579(+)
ENSMUSG00000025316	Banp	chr8	+	121978554	121978754	121978601	121978754	121975899	121975991	531	302280126	400	57472179	341	197	150	0.667084	1	0.983,1.0,1.0	0.935,0.989,0.993	0.022	chr8:121975991-121978555(+)	chr8:121975991-121978602(+)
ENSMUSG00000025316	Banp	chr8	+	121978578	121978754	121978601	121978754	121975899	121975991	532	866136	400	1510342	341	173	150	0.120759	0.58941	0.949,1.0,1.0	0.813,0.957,0.973	0.069	chr8:121975991-121978579(+)	chr8:121975991-121978602(+)
ENSMUSG00000025316	Banp	chr8	+	122007090	122007162	122007099	122007162	122005551	122005682	533	857327	604940	1714160	98945	159	150	0.262074	0.879134	0.572,0.584,0.389	0.641,0.599,0.557	-0.084	chr8:122005682-122007091(+)	chr8:122005682-122007100(+)
ENSMUSG00000030316	Tamm41	chr6	-	115012157	115012323	115012157	115012319	115016082	115016228	534	444263141	211210	134561394	21912	154	150	0.0355406	0.296538	0.954,0.955,0.932	0.985,0.966,0.97	-0.027	chr6:115012323-115016083(-)	chr6:115012319-115016083(-)
ENSMUSG00000062753	AI413582	chr17	-	27564148	27564254	27564148	27564215	27564384	27564410	536	386219143	27117	140582308	93632	189	150	0.224813	0.82222	0.919,0.94,0.942	0.925,0.928,0.884	0.021	chr17:27564254-27564385(-)	chr17:27564215-27564385(-)
ENSMUSG00000062753	AI413582	chr17	-	27564148	27564339	27564148	27564254	27564561	27564750	537	11310	552	7229	2	235	150	2.75707e-05	0.0028755	0.584,0.277,0.761	1.0,1.0,0.742	-0.373	chr17:27564339-27564562(-)	chr17:27564254-27564562(-)
ENSMUSG00000062753	AI413582	chr17	-	27564148	27564410	27564148	27564254	27564561	27564750	538	262152116	552	103410242	2	300	150	0.00324656	0.0659224	0.963,0.938,0.967	1.0,1.0,0.984	-0.039	chr17:27564410-27564562(-)	chr17:27564254-27564562(-)
ENSMUSG00000062753	AI413582	chr17	-	27564148	27564410	27564148	27564339	27564561	27564750	539	257152111	0	96400236	21	221	150	1	1	1.0,1.0,1.0	1.0,0.993,0.994	0.004	chr17:27564410-27564562(-)	chr17:27564339-27564562(-)
ENSMUSG00000030276	Ttll3	chr6	+	113394580	113394860	113394691	113394860	113393102	113393194	541	31288	402012	42511	104517	261	150	0.0739943	0.449324	0.308,0.446,0.277	0.187,0.242,0.271	0.11	chr6:113393194-113394581(+)	chr6:113393194-113394692(+)
ENSMUSG00000030276	Ttll3	chr6	+	113399663	113399771	113399666	113399771	113398769	113398884	542	703	9112	53	276	153	150	0.974123	1	0.433,0.0,0.595	0.0,0.412,0.329	0.096	chr6:113398884-113399664(+)	chr6:113398884-113399667(+)
ENSMUSG00000030276	Ttll3	chr6	+	113399663	113399771	113399704	113399771	113398769	113398884	543	19168	600	9389	40	191	150	0.171513	0.719035	0.713,1.0,1.0	1.0,0.882,1.0	-0.056	chr6:113398884-113399664(+)	chr6:113398884-113399705(+)
ENSMUSG00000030276	Ttll3	chr6	+	113399666	113399771	113399704	113399771	113398769	113398884	544	21277	600	114012	40	188	150	0.188478	0.750152	0.736,1.0,1.0	1.0,0.889,1.0	-0.051	chr6:113398884-113399667(+)	chr6:113398884-113399705(+)
ENSMUSG00000001632	Brpf1	chr6	+	113319037	113319361	113319040	113319361	113318411	113318721	545	1186627	311166111	1612680	91350215	153	150	0.571211	1	0.271,0.28,0.193	0.147,0.261,0.267	0.023	chr6:113318721-113319038(+)	chr6:113318721-113319041(+)
ENSMUSG00000030269	Mtmr14	chr6	+	113277789	113277945	113277830	113277945	113270521	113270701	546	20115976	1242	94277194	252	191	150	0.0138843	0.168558	0.929,0.969,0.968	0.974,0.978,0.987	-0.024	chr6:113270701-113277790(+)	chr6:113270701-113277831(+)
ENSMUSG00000034269	Setd5	chr6	+	113110316	113110525	113110373	113110525	113109884	113109990	547	545452152	284200108	120466322	133625291	207	150	4.96144e-08	2.52979e-05	0.582,0.621,0.505	0.395,0.351,0.445	0.172	chr6:113109990-113110317(+)	chr6:113109990-113110374(+)
ENSMUSG00000030102	Itpr1	chr6	+	108432645	108432696	108432648	108432696	108431460	108431496	552	1185	504	2199	12152	153	150	0.105631	0.552726	0.683,1.0,0.551	0.14,0.554,0.815	0.242	chr6:108431496-108432646(+)	chr6:108431496-108432649(+)
ENSMUSG00000022536	Glyr1	chr16	-	5021337	5021448	5021337	5021430	5026507	5026607	554	489426198	26215272	180782451	56266145	168	150	0.0453651	0.342966	0.625,0.714,0.711	0.742,0.724,0.735	-0.05	chr16:5021448-5026508(-)	chr16:5021430-5026508(-)
ENSMUSG00000030067	Foxp1	chr6	-	98945346	98945426	98945346	98945423	98945533	98945735	556	565451221	15810659	156734408	49218148	153	150	0.0727724	0.447657	0.778,0.807,0.786	0.757,0.767,0.73	0.039	chr6:98945426-98945534(-)	chr6:98945423-98945534(-)
ENSMUSG00000030067	Foxp1	chr6	-	99009903	99010057	99009903	99010054	99015423	99015510	557	375363169	31126	107517276	2228	153	150	0.0753511	0.456182	0.922,0.967,0.965	0.981,0.958,0.971	-0.019	chr6:99010057-99015424(-)	chr6:99010054-99015424(-)
ENSMUSG00000030067	Foxp1	chr6	-	99015423	99015513	99015423	99015510	99016527	99016665	558	292293112	715625	91397210	176744	153	150	0.289776	0.919817	0.801,0.837,0.815	0.84,0.853,0.824	-0.021	chr6:99015513-99016528(-)	chr6:99015510-99016528(-)
ENSMUSG00000030067	Foxp1	chr6	-	99075853	99076045	99075853	99075949	99162838	99163018	559	10410448	10	4013993	0	246	150	1	1	1.0,0.984,1.0	1.0,1.0,1.0	-0.005	chr6:99076045-99162839(-)	chr6:99075949-99162839(-)
ENSMUSG00000045095	Magi1	chr6	-	93694007	93694211	93694007	93694175	93697193	93697487	562	200	10	0	2	186	150	1	1	1.0,0.0,NA	NA,NA,0.0	0.5	chr6:93694211-93697194(-)	chr6:93694175-93697194(-)
ENSMUSG00000001415	Smg5	chr3	+	88349110	88349267	88349141	88349267	88347517	88347596	580	41255	418286147	156947	138536310	181	150	0.00498709	0.0880221	0.075,0.068,0.027	0.083,0.096,0.112	-0.04	chr3:88347596-88349111(+)	chr3:88347596-88349142(+)
ENSMUSG00000064065	Ipcef1	chr10	-	6980246	6980286	6980246	6980283	6996529	6996576	582	693721	1746	2911077	17156	153	150	0.869715	1	0.799,0.901,0.774	0.626,0.878,0.926	0.015	chr10:6980286-6996530(-)	chr10:6980283-6996530(-)
ENSMUSG00000029068	Ccnl2	chr4	+	155818538	155820428	155820328	155820428	155817922	155817987	588	545434197	397277163	218858405	99420224	300	150	0.000682827	0.0231289	0.407,0.439,0.377	0.524,0.505,0.475	-0.094	chr4:155817987-155818539(+)	chr4:155817987-155820329(+)
ENSMUSG00000034744	Nagk	chr6	+	83798482	83798654	83798543	83798654	83797955	83798097	590	7144	24417077	3356	82282165	211	150	0.0699876	0.43697	0.02,0.055,0.036	0.025,0.081,0.025	-0.007	chr6:83798097-83798483(+)	chr6:83798097-83798544(+)
ENSMUSG00000030032	Wdr54	chr6	-	83155069	83155240	83155069	83155136	83155477	83155540	592	200	100	20	2	254	150	1	1	0.542,NA,NA	NA,1.0,0.0	0.042	chr6:83155240-83155478(-)	chr6:83155136-83155478(-)
ENSMUSG00000037190	Cyb561d2	chr9	-	107541002	107541069	107541002	107541040	107541496	107541650	596	1882	1117659	2162	40204117	179	150	0.0222277	0.222507	0.12,0.081,0.028	0.04,0.062,0.014	0.038	chr9:107541069-107541497(-)	chr9:107541040-107541497(-)
ENSMUSG00000062785	Kcnc3	chr7	+	44598380	44598575	44598383	44598575	44595160	44596268	600	763	0	388	10	153	150	1	1	1.0,1.0,1.0	1.0,0.887,1.0	0.038	chr7:44596268-44598381(+)	chr7:44596268-44598384(+)
ENSMUSG00000055850	Rnf181	chr6	-	72360874	72361013	72360874	72360949	72361121	72361226	603	414423	411	257251	41710	214	150	0.000234894	0.0112284	0.878,0.969,0.942	0.814,0.748,0.781	0.149	chr6:72361013-72361122(-)	chr6:72360949-72361122(-)
ENSMUSG00000056305	Usp39	chr6	-	72338392	72338549	72338392	72338529	72339966	72340061	605	1754	803543310	4133	2421131672	170	150	0.464812	1	0.018,0.008,0.011	0.014,0.01,0.004	0.003	chr6:72338549-72339967(-)	chr6:72338529-72339967(-)
ENSMUSG00000052337	Immt	chr6	+	71852729	71852867	71852762	71852867	71851771	71851880	608	529403177	573450239	182727405	196691469	183	150	0.330488	0.980357	0.431,0.423,0.378	0.432,0.463,0.414	-0.026	chr6:71851880-71852730(+)	chr6:71851880-71852763(+)
ENSMUSG00000052337	Immt	chr6	+	71852729	71852867	71852765	71852867	71851771	71851880	609	568428188	1059430	188752446	31158103	186	150	0.527382	1	0.814,0.786,0.835	0.83,0.793,0.777	0.012	chr6:71851880-71852730(+)	chr6:71851880-71852766(+)
ENSMUSG00000052337	Immt	chr6	+	71852762	71852867	71852765	71852867	71851771	71851880	610	612475250	1059430	202716510	31158103	153	150	0.182624	0.73819	0.851,0.832,0.891	0.865,0.816,0.829	0.021	chr6:71851880-71852763(+)	chr6:71851880-71852766(+)
ENSMUSG00000020166	Cnot2	chr10	-	116549032	116549175	116549032	116549105	116581452	116581483	612	21614083	13153	73355197	5188	220	150	0.23016	0.829332	0.919,0.864,0.95	0.909,0.931,0.944	-0.017	chr10:116549175-116581453(-)	chr10:116549105-116581453(-)
ENSMUSG00000054474	Thnsl2	chr6	-	71138650	71138822	71138650	71138803	71139748	71139943	614	11	1847	10	2285	169	150	1	1	0.0,0.182,0.113	0.0,0.031,0.0	0.088	chr6:71138822-71139749(-)	chr6:71138803-71139749(-)
ENSMUSG00000023027	Atf1	chr15	+	100245231	100245345	100245244	100245345	100232732	100232831	615	12136	937636304	62611	2991399776	163	150	0.777691	1	0.012,0.018,0.018	0.018,0.017,0.013	0	chr15:100232831-100245232(+)	chr15:100232831-100245245(+)
ENSMUSG00000074643	Cpne1	chr2	-	156073798	156074035	156073798	156073992	156074175	156074309	616	528366212	430	196661437	120	193	150	1	1	0.99,0.99,1.0	0.993,0.996,1.0	-0.003	chr2:156074035-156074176(-)	chr2:156073992-156074176(-)
ENSMUSG00000002320	Tm9sf1	chr14	-	55637858	55638132	55637858	55638070	55640384	55640570	623	594432218	210	208880496	100	212	150	1	1	0.995,0.997,1.0	0.993,1.0,1.0	0	chr14:55638132-55640385(-)	chr14:55638070-55640385(-)
ENSMUSG00000028943	Espn	chr4	-	152130768	152131294	152130768	152130961	152134160	152134441	627	10	811	0	53	300	150	1	1	0.0,0.333,0.0	NA,0.0,0.0	0.111	chr4:152131294-152134161(-)	chr4:152130961-152134161(-)
ENSMUSG00000023952	Gtpbp2	chr17	+	46167222	46167394	46167341	46167394	46166591	46166650	629	581509210	413313	185690413	104437	269	150	0.755651	1	0.888,0.896,0.9	0.912,0.897,0.862	0.004	chr17:46166650-46167223(+)	chr17:46166650-46167342(+)
ENSMUSG00000035203	Epn1	chr7	+	5083662	5083982	5083729	5083982	5082017	5082121	636	1148876442	19113648	4011679927	66287129	217	150	0.550322	1	0.806,0.817,0.864	0.808,0.802,0.832	0.015	chr7:5082121-5083663(+)	chr7:5082121-5083730(+)
ENSMUSG00000035203	Epn1	chr7	+	5095887	5095974	5095890	5095974	5095642	5095753	637	21614473	18915071	68286200	81293198	153	150	0.47516	1	0.528,0.485,0.502	0.451,0.489,0.498	0.026	chr7:5095753-5095888(+)	chr7:5095753-5095891(+)
ENSMUSG00000038886	Man2a2	chr7	-	80363153	80363336	80363153	80363238	80363466	80363669	643	747556323	292614	236989533	55432	248	150	0.317442	0.960279	0.94,0.928,0.933	0.966,0.917,0.91	0.003	chr7:80363336-80363467(-)	chr7:80363238-80363467(-)
ENSMUSG00000044433	Camsap3	chr8	+	3602367	3602425	3602370	3602425	3602185	3602279	645	260	423	64	2103	153	150	0.987048	1	0.329,0.746,0.0	0.0,0.37,0.567	0.046	chr8:3602279-3602368(+)	chr8:3602279-3602371(+)
ENSMUSG00000030083	Abtb1	chr6	-	88838117	88838285	88838117	88838265	88838379	88838478	650	383282159	7116	127507278	32917	170	150	0.01581	0.182291	0.98,0.958,0.959	0.974,0.939,0.935	0.016	chr6:88838285-88838380(-)	chr6:88838265-88838380(-)
ENSMUSG00000030083	Abtb1	chr6	-	88840709	88840781	88840709	88840765	88840837	88840900	651	1391	329202100	547	117304212	166	150	0.287425	0.915967	0.034,0.039,0.009	0.037,0.012,0.029	0.001	chr6:88840781-88840838(-)	chr6:88840765-88840838(-)
ENSMUSG00000024913	Lrp5	chr19	-	3610038	3610238	3610038	3610209	3612197	3612521	659	418287162	19125	121569288	2109	179	150	0.0188567	0.20124	0.949,0.952,0.964	0.981,0.979,0.964	-0.02	chr19:3610238-3612198(-)	chr19:3610209-3612198(-)
ENSMUSG00000041594	Tmtc4	chr14	-	122933327	122933519	122933327	122933407	122941304	122941436	660	684	738345	493	2410080	262	150	0.721701	1	0.045,0.052,0.048	0.087,0.049,0.021	-0.004	chr14:122933519-122941305(-)	chr14:122933407-122941305(-)
ENSMUSG00000041594	Tmtc4	chr14	-	122944673	122944860	122944673	122944838	122945507	122945600	662	13132	634029	2134	2111560	172	150	0.0228489	0.225977	0.153,0.221,0.057	0.077,0.09,0.055	0.07	chr14:122944860-122945508(-)	chr14:122944838-122945508(-)
ENSMUSG00000022779	Top3b	chr16	+	16887831	16888005	16887857	16888005	16887576	16887723	671	867754380	302510	3061204770	184222	176	150	0.512698	1	0.961,0.963,0.97	0.935,0.961,0.968	0.01	chr16:16887723-16887832(+)	chr16:16887723-16887858(+)
ENSMUSG00000031342	Gpm6b	chrX	+	166385390	166388988	166386951	166388988	166383934	166384000	673	38141	0	499	10	300	150	1	1	1.0,1.0,1.0	1.0,0.818,1.0	0.061	chrX:166384000-166385391(+)	chrX:166384000-166386952(+)
ENSMUSG00000042810	Krba1	chr6	+	48405233	48405389	48405236	48405389	48403990	48404140	675	564027	32	105514	364	153	150	0.0032063	0.0653943	1.0,0.929,0.93	0.766,0.9,0.774	0.14	chr6:48404140-48405234(+)	chr6:48404140-48405237(+)
ENSMUSG00000042810	Krba1	chr6	+	48406296	48406431	48406299	48406431	48405233	48405389	676	304214	101	134524	112	153	150	1	1	0.967,1.0,0.932	0.927,0.978,0.922	0.024	chr6:48405389-48406297(+)	chr6:48405389-48406300(+)
ENSMUSG00000057691	Zfp746	chr6	-	48062394	48064952	48062394	48064949	48066428	48066554	677	905735	1468940	2012085	4617982	153	150	0.835138	1	0.377,0.386,0.462	0.299,0.397,0.504	0.008	chr6:48064952-48066429(-)	chr6:48064949-48066429(-)
ENSMUSG00000072653	Zfp783	chr6	+	47945836	47945962	47945882	47945962	47945428	47945751	678	654817	654810	185346	2811360	196	150	0.00695156	0.111154	0.434,0.434,0.565	0.33,0.264,0.37	0.156	chr6:47945751-47945837(+)	chr6:47945751-47945883(+)
ENSMUSG00000009894	Snap47	chr11	-	59442791	59442912	59442791	59442841	59449914	59449999	679	212	820	120	21	221	150	0.264834	0.883622	0.145,0.253,1.0	1.0,0.404,0.0	-0.002	chr11:59442912-59449915(-)	chr11:59442841-59449915(-)
ENSMUSG00000026434	Nucks1	chr1	+	131929612	131929762	131929615	131929762	131928063	131928216	680	392828191435	892598419	123853383186	3681335876	153	150	0.16295	0.700922	0.812,0.822,0.771	0.767,0.797,0.781	0.02	chr1:131928216-131929613(+)	chr1:131928216-131929616(+)
ENSMUSG00000032376	Usp3	chr9	-	66542512	66542626	66542512	66542613	66543945	66544028	681	548395209	0	133651426	240	163	150	1	1	1.0,1.0,1.0	0.984,0.993,1.0	0.008	chr9:66542626-66543946(-)	chr9:66542613-66543946(-)
ENSMUSG00000016477	E2f3	chr13	-	29918575	29918795	29918575	29918777	29920113	29920225	684	22817767	613724	68293164	359161	168	150	0.0435762	0.334284	0.769,0.81,0.714	0.634,0.742,0.706	0.07	chr13:29918795-29920114(-)	chr13:29918777-29920114(-)
ENSMUSG00000061436	Hipk2	chr6	-	38721454	38721597	38721454	38721594	38729920	38730042	689	18715083	371614	56257135	93618	153	150	0.564628	1	0.832,0.902,0.853	0.859,0.875,0.88	-0.009	chr6:38721597-38729921(-)	chr6:38721594-38729921(-)
ENSMUSG00000061436	Hipk2	chr6	-	38730868	38731076	38730868	38730995	38737357	38737520	690	355274134	16212770	115388248	4826198	231	150	0.770219	1	0.587,0.584,0.554	0.609,0.491,0.622	0.001	chr6:38731076-38737358(-)	chr6:38730995-38737358(-)
ENSMUSG00000038665	Dgki	chr6	-	36915381	36915528	36915381	36915509	36916420	36916461	691	10	1520	0	150	169	150	1	1	0.0,0.307,NA	0.0,0.0,NA	0.153	chr6:36915528-36916421(-)	chr6:36915509-36916421(-)
ENSMUSG00000038665	Dgki	chr6	-	37016604	37016749	37016604	37016678	37019915	37019978	692	200	4110	20	282	221	150	1	1	0.253,0.0,NA	0.0,0.145,0.0	0.078	chr6:37016749-37019916(-)	chr6:37016678-37019916(-)
ENSMUSG00000008373	Prpf31	chr7	+	3638630	3638758	3638648	3638758	3636661	3636751	694	968622326	222	3011405814	240	168	150	1	1	0.998,0.996,0.993	0.993,0.997,1.0	-0.001	chr7:3636751-3638631(+)	chr7:3636751-3638649(+)
ENSMUSG00000049339	Retreg2	chr1	+	75144303	75144439	75144391	75144439	75143922	75143953	698	794602301	596	2621227683	42715	238	150	0.024654	0.237683	0.99,0.977,0.969	0.976,0.966,0.966	0.009	chr1:75143953-75144304(+)	chr1:75143953-75144392(+)
ENSMUSG00000001017	Chtop	chr3	-	90503095	90503282	90503095	90503279	90506107	90506261	700	763530312	495301150	3001096651	182683384	153	150	0.558092	1	0.602,0.633,0.671	0.618,0.611,0.624	0.018	chr3:90503282-90506108(-)	chr3:90503279-90506108(-)
ENSMUSG00000001017	Chtop	chr3	-	90506107	90507258	90506107	90506261	90507544	90507626	702	469319130	644446230	147590348	195906573	300	150	0.758395	1	0.267,0.263,0.22	0.274,0.246,0.233	-0.001	chr3:90507258-90507545(-)	chr3:90506261-90507545(-)
ENSMUSG00000058440	Nrf1	chr6	+	30089911	30090146	30089914	30090146	30088832	30088988	705	18211870	16811355	72283182	5919193	153	150	0.0222556	0.222507	0.515,0.506,0.555	0.545,0.592,0.657	-0.073	chr6:30088988-30089912(+)	chr6:30088988-30089915(+)
ENSMUSG00000015094	Npdc1	chr2	+	25407840	25408014	25407843	25408014	25407595	25407736	711	761	0	1411	10	153	150	1	1	1.0,1.0,1.0	NA,0.932,1.0	0.034	chr2:25407736-25407841(+)	chr2:25407736-25407844(+)
ENSMUSG00000029534	St7	chr6	+	17850356	17852412	17852257	17852412	17848003	17848079	714	575725	15212357	146831	62256123	300	150	0.00314635	0.0652107	0.158,0.188,0.18	0.101,0.117,0.112	0.065	chr6:17848079-17850357(+)	chr6:17848079-17852258(+)
ENSMUSG00000069910	Spdl1	chr11	-	34822373	34822472	34822373	34822468	34822559	34822709	715	17713671	102	65241138	20	154	150	1	1	0.994,1.0,0.972	1.0,0.992,1.0	-0.009	chr11:34822472-34822560(-)	chr11:34822468-34822560(-)
ENSMUSG00000029638	Glcci1	chr6	+	8573181	8573298	8573184	8573298	8558499	8558586	718	655213	1147045	236942	3410268	153	150	0.367043	1	0.359,0.421,0.221	0.399,0.399,0.377	-0.058	chr6:8558586-8573182(+)	chr6:8558586-8573185(+)
ENSMUSG00000036138	Acaa1a	chr9	+	119348580	119348771	119348585	119348771	119347729	119347810	721	472386219	412	187697370	210	155	150	1	1	0.991,0.997,0.991	0.989,0.999,1.0	-0.003	chr9:119347810-119348581(+)	chr9:119347810-119348586(+)
ENSMUSG00000034021	Pds5b	chr5	+	150801118	150801229	150801121	150801229	150800577	150801017	723	643418	625495232	34333	172878458	153	150	0.00447452	0.0820672	0.091,0.063,0.071	0.017,0.046,0.066	0.032	chr5:150801017-150801119(+)	chr5:150801017-150801122(+)
ENSMUSG00000054263	Lifr	chr15	+	7185066	7185733	7185565	7185733	7184716	7184818	724	20	1563	0	376	300	150	1	1	0.0,0.143,0.0	0.0,0.0,0.0	0.048	chr15:7184818-7185067(+)	chr15:7184818-7185566(+)
ENSMUSG00000041147	Brca2	chr5	+	150568913	150569746	150568938	150569746	150567606	150567768	726	463	17016877	4144	82283146	175	150	0.300097	0.938109	0.02,0.03,0.032	0.04,0.041,0.023	-0.007	chr5:150567768-150568914(+)	chr5:150567768-150568939(+)
ENSMUSG00000030826	Bcat2	chr7	+	45585110	45585230	45585125	45585230	45584916	45585027	728	563435242	401	211924526	103	165	150	1	1	0.992,1.0,0.995	0.995,1.0,0.994	-0.001	chr7:45585027-45585111(+)	chr7:45585027-45585126(+)
ENSMUSG00000038777	Sema6c	chr3	+	95169528	95169713	95169581	95169713	95169163	95169381	730	11	241	20	42	203	150	1	1	0.0,0.156,0.425	NA,0.27,0.0	0.059	chr3:95169381-95169529(+)	chr3:95169381-95169582(+)
ENSMUSG00000002944	Cd36	chr5	-	17828774	17828984	17828774	17828981	17829455	17829549	731	751	0	2513	4	153	150	0.559213	1	1.0,1.0,1.0	1.0,1.0,0.761	0.08	chr5:17828984-17829456(-)	chr5:17828981-17829456(-)
ENSMUSG00000036180	Gatad2a	chr8	-	69916283	69916451	69916283	69916448	69916568	69916700	733	19312268	527373213	57235127	157881454	153	150	0.160728	0.695832	0.264,0.243,0.238	0.263,0.207,0.215	0.02	chr8:69916451-69916569(-)	chr8:69916448-69916569(-)
ENSMUSG00000055991	Zkscan5	chr5	+	145212488	145212640	145212504	145212640	145211745	145211828	734	320	483524	3110	197849	166	150	0.0629144	0.408943	0.053,0.049,0.0	0.125,0.113,0.0	-0.045	chr5:145211828-145212489(+)	chr5:145211828-145212505(+)
ENSMUSG00000034652	Cd300a	chr11	+	114894657	114894778	114894669	114894778	114893237	114893594	735	533353159	615726	152759475	178951	162	150	0.159102	0.690746	0.89,0.852,0.85	0.892,0.888,0.896	-0.028	chr11:114893594-114894658(+)	chr11:114893594-114894670(+)
ENSMUSG00000079109	Pms2	chr5	+	143911920	143912060	143911925	143912060	143909963	143910079	738	1066836	222015	3118998	152810	155	150	0.178975	0.732663	0.823,0.767,0.699	0.667,0.867,0.905	-0.05	chr5:143910079-143911921(+)	chr5:143910079-143911926(+)
ENSMUSG00000079109	Pms2	chr5	+	143928098	143929042	143928941	143929042	143925220	143926073	740	22519465	1	82276180	20	300	150	1	1	1.0,1.0,0.97	1.0,0.986,1.0	-0.005	chr5:143926073-143928099(+)	chr5:143926073-143928942(+)
ENSMUSG00000045078	Rnf216	chr5	-	143090119	143090929	143090119	143090758	143092994	143093125	745	384308157	437356148	159740420	137449233	300	150	2.34497e-05	0.00250258	0.305,0.302,0.347	0.367,0.452,0.474	-0.113	chr5:143090929-143092995(-)	chr5:143090758-143092995(-)
ENSMUSG00000045078	Rnf216	chr5	-	143098378	143098505	143098378	143098500	143112898	143112980	747	17517170	23227	65280141	83313	155	150	0.61416	1	0.88,0.883,0.906	0.887,0.891,0.913	-0.007	chr5:143098505-143112899(-)	chr5:143098500-143112899(-)
ENSMUSG00000078765	U2af1l4	chr7	+	30563884	30563996	30563929	30563996	30563556	30563619	748	22205	563344181	5258	186733432	195	150	0.0669909	0.424615	0.029,0.043,0.021	0.02,0.026,0.014	0.011	chr7:30563619-30563885(+)	chr7:30563619-30563930(+)
ENSMUSG00000078765	U2af1l4	chr7	+	30564202	30564607	30564473	30564607	30564081	30564131	750	400280135	0	153658388	1	300	150	1	1	1.0,1.0,1.0	1.0,1.0,0.995	0.002	chr7:30564131-30564203(+)	chr7:30564131-30564474(+)
ENSMUSG00000028212	Ccne2	chr4	+	11192814	11192911	11192817	11192911	11192680	11192717	751	532358179	966427	208850564	4614791	153	150	0.845491	1	0.845,0.846,0.867	0.816,0.85,0.859	0.011	chr4:11192717-11192815(+)	chr4:11192717-11192818(+)
ENSMUSG00000036555	Iqce	chr5	-	140669021	140669120	140669021	140669105	140670466	140670567	752	1471	1484	112712	213	165	150	0.0106993	0.144835	0.476,0.443,0.185	1.0,0.539,0.784	-0.406	chr5:140669120-140670467(-)	chr5:140669105-140670467(-)
ENSMUSG00000025858	Get4	chr5	+	139262869	139262951	139262872	139262951	139262480	139262559	756	520402188	24205	207707401	95212	153	150	0.288979	0.918368	0.955,0.952,0.974	0.958,0.93,0.97	0.008	chr5:139262559-139262870(+)	chr5:139262559-139262873(+)
ENSMUSG00000004865	Srpk1	chr17	-	28599470	28600456	28599470	28599869	28600868	28600894	757	989754390	243011	2621333716	245418	300	150	0.0691494	0.432915	0.954,0.926,0.947	0.845,0.925,0.952	0.035	chr17:28600456-28600869(-)	chr17:28599869-28600869(-)
ENSMUSG00000036503	Rnf13	chr3	+	57801717	57802537	57802446	57802537	57796197	57796285	759	1164	24620291	32512	99409207	300	150	0.169976	0.717592	0.022,0.015,0.022	0.015,0.03,0.028	-0.005	chr3:57796285-57801718(+)	chr3:57796285-57802447(+)
ENSMUSG00000027466	Rbck1	chr2	-	152319123	152319420	152319123	152319303	152322159	152322271	761	714727	539411239	267551	170731477	267	150	0.622012	1	0.069,0.06,0.06	0.079,0.054,0.057	0	chr2:152319420-152322160(-)	chr2:152319303-152322160(-)
ENSMUSG00000020758	Itgb4	chr11	+	115989718	115989841	115989721	115989841	115988889	115989019	764	100	120	100	0	153	150	1	1	0.495,0.0,NA	1.0,NA,NA	-0.752	chr11:115989019-115989719(+)	chr11:115989019-115989722(+)
ENSMUSG00000029705	Cux1	chr5	-	136312642	136313314	136312642	136313008	136314306	136314403	770	639646258	523828	168711442	46034	300	150	0.585341	1	0.86,0.895,0.822	0.955,0.856,0.867	-0.034	chr5:136313314-136314307(-)	chr5:136313008-136314307(-)
ENSMUSG00000029705	Cux1	chr5	-	136326749	136326938	136326749	136326932	136332623	136332728	771	322256122	670446200	125508240	167829476	156	150	0.362458	1	0.316,0.356,0.37	0.419,0.371,0.327	-0.025	chr5:136326938-136332624(-)	chr5:136326932-136332624(-)
ENSMUSG00000029705	Cux1	chr5	-	136326749	136327010	136326749	136326932	136332623	136332728	772	24619093	670446200	94330197	167829476	228	150	0.576534	1	0.195,0.219,0.234	0.27,0.208,0.214	-0.015	chr5:136327010-136332624(-)	chr5:136326932-136332624(-)
ENSMUSG00000029705	Cux1	chr5	-	136326749	136327010	136326749	136326938	136332623	136332728	773	19915778	275223107	75279170	106455211	222	150	0.784398	1	0.328,0.322,0.33	0.323,0.293,0.352	0.004	chr5:136327010-136332624(-)	chr5:136326938-136332624(-)
ENSMUSG00000030978	Rrm1	chr7	+	102466863	102467066	102466877	102467066	102465717	102465813	774	733535	22361603850	1510543	85232271983	164	150	0.264851	0.883622	0.029,0.02,0.036	0.016,0.029,0.019	0.007	chr7:102465813-102466864(+)	chr7:102465813-102466878(+)
ENSMUSG00000004947	Dtx2	chr5	+	136028498	136028572	136028501	136028572	136026469	136026607	776	15911956	202	5717996	72	153	150	0.173611	0.724272	0.987,1.0,0.965	1.0,0.962,0.979	0.004	chr5:136026607-136028499(+)	chr5:136026607-136028502(+)
ENSMUSG00000019178	Styxl1	chr5	-	135770255	135770362	135770255	135770359	135778250	135778291	779	320	0	0	12	153	150	1	1	1.0,1.0,NA	NA,0.0,0.0	1	chr5:135770362-135778251(-)	chr5:135770359-135778251(-)
ENSMUSG00000025607	Copg2	chr6	-	30749405	30749504	30749405	30749501	30749760	30749899	780	657493273	1374	223908554	72113	153	150	0.134864	0.622628	0.98,0.986,0.985	0.969,0.977,0.977	0.009	chr6:30749504-30749761(-)	chr6:30749501-30749761(-)
ENSMUSG00000005378	Bud23	chr5	-	135053548	135053722	135053548	135053638	135056027	135056086	781	263615	820476259	135030	2941117707	234	150	0.471494	1	0.02,0.046,0.036	0.028,0.028,0.026	0.007	chr5:135053722-135056028(-)	chr5:135053638-135056028(-)
ENSMUSG00000038708	Golga4	chr9	+	118566907	118566979	118566958	118566979	118565556	118565667	782	24231	251218117	12411	83313140	201	150	0.389831	1	0.067,0.073,0.006	0.009,0.054,0.055	0.009	chr9:118565667-118566908(+)	chr9:118565667-118566959(+)
ENSMUSG00000022701	Ccdc191	chr16	+	43905345	43905483	43905350	43905483	43898089	43898231	783	727330	221	169663	40	155	150	0.59838	1	0.972,0.972,0.967	1.0,0.959,1.0	-0.016	chr16:43898231-43905346(+)	chr16:43898231-43905351(+)
ENSMUSG00000036270	Edc4	chr8	+	105888117	105888308	105888120	105888308	105887953	105888045	784	431514	23315562	95747	85316144	153	150	0.23024	0.829332	0.153,0.087,0.181	0.094,0.15,0.242	-0.022	chr8:105888045-105888118(+)	chr8:105888045-105888121(+)
ENSMUSG00000036270	Edc4	chr8	+	105888595	105888755	105888598	105888755	105888387	105888518	785	563417	544326	178548	246949	153	150	0.432297	1	0.504,0.437,0.391	0.41,0.547,0.49	-0.038	chr8:105888518-105888596(+)	chr8:105888518-105888599(+)
ENSMUSG00000036270	Edc4	chr8	+	105889624	105889729	105889672	105889729	105889103	105889540	787	340302141	653620	121495288	156546	198	150	0.577559	1	0.798,0.864,0.842	0.859,0.852,0.826	-0.011	chr8:105889540-105889625(+)	chr8:105889540-105889673(+)
ENSMUSG00000036270	Edc4	chr8	+	105889630	105889729	105889672	105889729	105889103	105889540	788	1169141	653620	4116084	156546	192	150	0.632301	1	0.582,0.664,0.616	0.681,0.658,0.588	-0.022	chr8:105889540-105889631(+)	chr8:105889540-105889673(+)
ENSMUSG00000060261	Gtf2i	chr5	-	134243506	134243599	134243506	134243587	134243900	134243956	789	1064797334	1070825390	3751424838	3261391756	162	150	0.131625	0.6151	0.479,0.472,0.442	0.516,0.487,0.507	-0.039	chr5:134243599-134243901(-)	chr5:134243587-134243901(-)
ENSMUSG00000060261	Gtf2i	chr5	-	134289286	134289421	134289286	134289412	134293746	134293885	790	15971321587	440	52521251260	0	159	150	1	1	0.997,0.997,1.0	1.0,1.0,1.0	-0.002	chr5:134289421-134293747(-)	chr5:134289412-134293747(-)
ENSMUSG00000025337	Sbds	chr5	-	130253938	130254009	130253938	130254004	130255209	130255310	794	522412	1030	316949	318	155	150	0.252476	0.868089	0.834,0.886,1.0	0.909,0.985,0.856	-0.01	chr5:130254009-130255210(-)	chr5:130254004-130255210(-)
ENSMUSG00000058729	Lin9	chr1	+	180665782	180665940	180665808	180665940	180661476	180661602	797	25021393	813	104395219	75	176	150	0.597757	1	0.964,0.995,0.964	1.0,0.98,0.974	-0.01	chr1:180661602-180665783(+)	chr1:180661602-180665809(+)
ENSMUSG00000058729	Lin9	chr1	+	180668763	180668883	180668765	180668883	180667324	180667458	798	242175100	240	61349170	1	152	150	1	1	0.992,0.977,1.0	1.0,1.0,0.994	-0.008	chr1:180667458-180668764(+)	chr1:180667458-180668766(+)
ENSMUSG00000029478	Ncor2	chr5	-	125037273	125037379	125037273	125037376	125037860	125037997	799	1267844	403510	32212104	13320	153	150	0.000778581	0.0255208	0.755,0.686,0.812	0.969,0.863,0.836	-0.138	chr5:125037379-125037861(-)	chr5:125037376-125037861(-)
ENSMUSG00000029478	Ncor2	chr5	-	125041795	125041967	125041795	125041964	125042744	125042865	800	494117	17411977	185132	45203148	153	150	0.596147	1	0.216,0.252,0.178	0.282,0.198,0.175	-0.003	chr5:125041967-125042745(-)	chr5:125041964-125042745(-)
ENSMUSG00000029478	Ncor2	chr5	-	125050910	125051118	125050910	125051058	125055732	125055875	801	1246738	625411194	4118889	203673325	210	150	0.00903876	0.13252	0.124,0.104,0.123	0.126,0.166,0.164	-0.035	chr5:125051118-125055733(-)	chr5:125051058-125055733(-)
ENSMUSG00000038126	Mphosph9	chr5	-	124259967	124260215	124259967	124260169	124260934	124261035	805	26317490	212	69321140	30	196	150	1	1	0.99,0.993,0.972	1.0,0.988,1.0	-0.011	chr5:124260215-124260935(-)	chr5:124260169-124260935(-)
ENSMUSG00000038126	Mphosph9	chr5	-	124320844	124320998	124320844	124320954	124324873	124325137	806	846934	12310248	4514169	148754	194	150	3.50736e-05	0.00303685	0.346,0.343,0.354	0.713,0.556,0.497	-0.241	chr5:124320998-124324874(-)	chr5:124320954-124324874(-)
ENSMUSG00000035949	Fbxw2	chr2	-	34822557	34823067	34822557	34822975	34825961	34826070	807	401324164	873	121481380	34223	242	150	1.54746e-06	0.000394517	0.969,0.966,0.971	0.962,0.877,0.911	0.052	chr2:34823067-34825962(-)	chr2:34822975-34825962(-)
ENSMUSG00000000915	Hip1r	chr5	+	123996475	123996581	123996519	123996581	123996230	123996371	808	14135	307222159	6229	85350192	194	150	0.363655	1	0.034,0.043,0.024	0.052,0.046,0.035	-0.011	chr5:123996371-123996476(+)	chr5:123996371-123996520(+)
ENSMUSG00000061882	Ccdc62	chr5	+	123951751	123951867	123951800	123951867	123951198	123951287	809	100	410	44	70	199	150	1	1	0.159,0.0,NA	NA,0.301,1.0	-0.571	chr5:123951287-123951752(+)	chr5:123951287-123951801(+)
ENSMUSG00000061882	Ccdc62	chr5	+	123968130	123969895	123968136	123969895	123966835	123966928	810	435	0	476	400	156	150	0.17622	0.729372	1.0,1.0,1.0	0.49,1.0,1.0	0.17	chr5:123966928-123968131(+)	chr5:123966928-123968137(+)
ENSMUSG00000029422	Rsrc2	chr5	-	123733555	123733635	123733555	123733630	123736558	123736681	812	620517173	820	273901597	252	155	150	1	1	0.987,0.996,1.0	0.992,0.994,0.997	0	chr5:123733635-123736559(-)	chr5:123733630-123736559(-)
ENSMUSG00000029422	Rsrc2	chr5	-	123740671	123740884	123740671	123740862	123742778	123742856	813	13814862	665114	80290113	196449	172	150	0.265157	0.883622	0.646,0.717,0.794	0.786,0.798,0.668	-0.032	chr5:123740884-123742779(-)	chr5:123740862-123742779(-)
ENSMUSG00000029422	Rsrc2	chr5	-	123740671	123740884	123740671	123740862	123743637	123743678	814	756931	448398163	3712057	175588464	172	150	0.99199	1	0.127,0.131,0.142	0.156,0.151,0.097	-0.001	chr5:123740884-123743638(-)	chr5:123740862-123743638(-)
ENSMUSG00000029440	Psmd9	chr5	+	123246193	123246282	123246196	123246282	123241831	123241933	816	21217067	202	90331196	12	153	150	1	1	0.99,1.0,0.97	1.0,0.997,0.99	-0.009	chr5:123241933-123246194(+)	chr5:123241933-123246197(+)
ENSMUSG00000038384	Setd1b	chr5	+	123158392	123158944	123158515	123158944	123157752	123157867	818	1131961416	42	3581202671	100	273	150	1	1	1.0,0.992,0.991	0.995,1.0,1.0	-0.004	chr5:123157867-123158393(+)	chr5:123157867-123158516(+)
ENSMUSG00000021902	Phf7	chr14	-	31240858	31241009	31240858	31240983	31241725	31241827	819	202	12810352	261	45180108	176	150	0.329351	0.978882	0.013,0.0,0.032	0.036,0.028,0.008	-0.009	chr14:31241009-31241726(-)	chr14:31240983-31241726(-)
ENSMUSG00000061518	Cox5b	chr1	+	36692430	36692550	36692450	36692550	36692210	36692284	820	1137036	430430731596	3717398	151263733863	170	150	0.573336	1	0.023,0.02,0.02	0.021,0.023,0.022	-0.001	chr1:36692284-36692431(+)	chr1:36692284-36692451(+)
ENSMUSG00000029462	Vps29	chr5	+	122360012	122360204	122360028	122360204	122354421	122354476	823	391310162	1124	209786459	291	166	150	0.0714654	0.441393	0.97,0.993,0.973	0.99,0.987,0.998	-0.013	chr5:122354476-122360013(+)	chr5:122354476-122360029(+)
ENSMUSG00000043036	Ccdc63	chr5	-	122129722	122129955	122129722	122129892	122130288	122130405	825	220	1200	126	112	213	150	1	1	0.105,1.0,NA	0.413,0.585,0.679	-0.007	chr5:122129955-122130289(-)	chr5:122129892-122130289(-)
ENSMUSG00000074129	Rpl13a	chr7	-	45126114	45126253	45126114	45126237	45126477	45126537	826	14641198592	303942121410617	69521921417	107434494027966	166	150	0.887291	1	0.042,0.049,0.048	0.055,0.042,0.044	-0.001	chr7:45126253-45126478(-)	chr7:45126237-45126478(-)
ENSMUSG00000074129	Rpl13a	chr7	-	45126708	45126827	45126708	45126794	45126990	45127092	827	27519598	24413171118964	90453311	88843731323274	183	150	0.889809	1	0.009,0.009,0.009	0.008,0.01,0.011	-0.001	chr7:45126827-45126991(-)	chr7:45126794-45126991(-)
ENSMUSG00000074129	Rpl13a	chr7	-	45126990	45127092	45126990	45127087	45127208	45127274	828	357812602713045	403817	121865256932510	107748	155	150	1	1	0.999,0.998,0.999	0.999,0.998,0.998	0	chr7:45127092-45127209(-)	chr7:45127087-45127209(-)
ENSMUSG00000043733	Ptpn11	chr5	-	121144529	121144696	121144529	121144684	121149102	121149234	829	28714492	420313156	87370216	135585297	162	150	0.217148	0.806224	0.388,0.299,0.353	0.374,0.369,0.402	-0.035	chr5:121144696-121149103(-)	chr5:121144684-121149103(-)
ENSMUSG00000040370	Etfrf1	chr6	+	145214521	145215271	145215183	145215271	145211155	145211252	831	10169	1599368	113212	67223125	300	150	0.404033	1	0.03,0.079,0.062	0.076,0.067,0.046	-0.006	chr6:145211252-145214522(+)	chr6:145211252-145215184(+)
ENSMUSG00000038831	Ralgps1	chr2	-	33146569	33146653	33146569	33146650	33158909	33159036	836	1182	340	22314	200	153	150	0.00778395	0.120677	0.782,0.662,1.0	0.495,1.0,1.0	-0.017	chr2:33146653-33158910(-)	chr2:33146650-33158910(-)
ENSMUSG00000018076	Med13l	chr5	+	118751839	118752009	118751866	118752009	118751530	118751754	837	11210038	342270128	4013661	103440225	177	150	0.565345	1	0.217,0.239,0.201	0.248,0.208,0.187	0.005	chr5:118751754-118751840(+)	chr5:118751754-118751867(+)
ENSMUSG00000032898	Fbxo21	chr5	+	118000316	118000528	118000337	118000528	117995369	117995502	839	262010	845515	155831	1810162	171	150	0.083744	0.483398	0.214,0.242,0.369	0.422,0.335,0.305	-0.079	chr5:117995502-118000317(+)	chr5:117995502-118000338(+)
ENSMUSG00000041638	Gcn1l1	chr5	+	115614860	115614974	115614863	115614974	115614330	115614600	844	496428233	200	157646404	30	153	150	1	1	0.996,1.0,1.0	1.0,0.995,1.0	0	chr5:115614600-115614861(+)	chr5:115614600-115614864(+)
ENSMUSG00000067274	Rplp0	chr5	+	115560718	115561004	115560740	115561004	115559786	115559888	845	593211	344002576412835	238418	126465428833624	172	150	1	1	0.001,0.001,0.001	0.002,0.001,0.0	0	chr5:115559888-115560719(+)	chr5:115559888-115560741(+)
ENSMUSG00000017286	Glod4	chr11	-	76239451	76239572	76239451	76239504	76240872	76240922	846	14751060559	0	55421921425	222	218	150	1	1	1.0,1.0,1.0	0.995,0.999,0.998	0.003	chr11:76239572-76240873(-)	chr11:76239504-76240873(-)
ENSMUSG00000032827	Ppp1r9a	chr6	+	5134638	5134932	5134688	5134932	5134016	5134174	848	271	1462	116	2118	200	150	0.685796	1	0.097,0.467,0.273	0.273,0.064,0.36	0.047	chr6:5134174-5134639(+)	chr6:5134174-5134689(+)
ENSMUSG00000036819	Jmjd4	chr11	+	59453791	59454059	59453827	59454059	59453510	59453645	851	474810	40	256559	12	186	150	0.715107	1	1.0,0.906,1.0	1.0,0.981,0.96	-0.012	chr11:59453645-59453792(+)	chr11:59453645-59453828(+)
ENSMUSG00000036819	Jmjd4	chr11	+	59453791	59454059	59453877	59454059	59453510	59453645	852	717018	645517	42108108	147448	236	150	0.0118778	0.153416	0.414,0.447,0.402	0.656,0.481,0.588	-0.154	chr11:59453645-59453792(+)	chr11:59453645-59453878(+)
ENSMUSG00000036819	Jmjd4	chr11	+	59453827	59454059	59453877	59454059	59453510	59453645	853	24288	645517	174451	147448	200	150	0.00673303	0.109104	0.22,0.276,0.261	0.477,0.308,0.443	-0.157	chr11:59453645-59453828(+)	chr11:59453645-59453878(+)
ENSMUSG00000072720	Myo18b	chr5	-	112871420	112871638	112871420	112871597	112872383	112872496	854	31	313120	100	5347	191	150	0.532443	1	0.0,0.071,0.038	0.136,0.0,0.0	-0.009	chr5:112871638-112872384(-)	chr5:112871597-112872384(-)
ENSMUSG00000037907	Ankrd13b	chr11	-	77473010	77473200	77473010	77473168	77473280	77473411	858	2360	1098629	61114	2915398	182	150	0.937062	1	0.148,0.054,0.0	0.146,0.056,0.105	-0.035	chr11:77473200-77473281(-)	chr11:77473168-77473281(-)
ENSMUSG00000029500	Pgam5	chr5	-	110265511	110265645	110265511	110265642	110265739	110265828	861	23315671	23714795	89374233	89340225	153	150	0.379438	1	0.491,0.51,0.423	0.495,0.519,0.504	-0.031	chr5:110265645-110265740(-)	chr5:110265642-110265740(-)
ENSMUSG00000014668	Chfr	chr5	+	110140353	110140453	110140375	110140453	110136050	110136194	862	325232107	13238	103423218	86520	172	150	0.00289749	0.062218	0.956,0.898,0.921	0.918,0.85,0.905	0.034	chr5:110136194-110140354(+)	chr5:110136194-110140376(+)
ENSMUSG00000014668	Chfr	chr5	+	110158798	110158918	110158801	110158918	110154836	110154982	864	23514488	565120	85332172	2411364	153	150	0.155211	0.681047	0.804,0.735,0.812	0.776,0.742,0.725	0.036	chr5:110154982-110158799(+)	chr5:110154982-110158802(+)
ENSMUSG00000030051	Aplf	chr6	-	87658432	87658565	87658432	87658555	87658840	87658988	868	1219945	22	47184108	200	160	150	1	1	1.0,0.979,0.955	0.957,1.0,1.0	-0.008	chr6:87658565-87658841(-)	chr6:87658555-87658841(-)
ENSMUSG00000033540	Idua	chr5	+	108680294	108680497	108680394	108680497	108680110	108680206	872	14712554	13144	5422598	3164	250	150	0.118569	0.585699	0.872,0.843,0.89	0.915,0.894,0.936	-0.047	chr5:108680206-108680295(+)	chr5:108680206-108680395(+)
ENSMUSG00000029267	Mtf2	chr5	+	108104394	108104530	108104425	108104530	108104265	108104318	877	36313	821682322	243323	2501015687	181	150	0.515259	1	0.035,0.036,0.008	0.074,0.026,0.027	-0.016	chr5:108104318-108104395(+)	chr5:108104318-108104426(+)
ENSMUSG00000016933	Plcg1	chr2	+	160761735	160761923	160761738	160761923	160761559	160761648	879	873	22317374	473	92251147	153	150	0.399903	1	0.034,0.038,0.038	0.041,0.027,0.02	0.007	chr2:160761648-160761736(+)	chr2:160761648-160761739(+)
ENSMUSG00000033773	Rpap2	chr5	+	107641782	107642922	107641953	107642922	107633062	107633131	880	666323	924	3215995	463	300	150	0.0955309	0.523765	0.786,0.94,0.742	0.8,0.93,0.941	-0.068	chr5:107633131-107641783(+)	chr5:107633131-107641954(+)
ENSMUSG00000029279	Brdt	chr5	+	107370154	107370329	107370157	107370329	107369302	107369364	881	240	202	22	0	153	150	1	1	0.495,1.0,0.0	NA,1.0,1.0	-0.502	chr5:107369364-107370155(+)	chr5:107369364-107370158(+)
ENSMUSG00000025936	Gm4956	chr1	-	21291294	21291436	21291294	21291365	21293479	21293612	883	20	0	103	12	221	150	1	1	NA,1.0,NA	1.0,0.0,0.504	0.499	chr1:21291436-21293480(-)	chr1:21291365-21293480(-)
ENSMUSG00000036781	Rps27l	chr9	+	66948638	66948717	66948640	66948717	66947586	66947697	884	652524	0	148394	50	152	150	0.493244	1	1.0,1.0,1.0	1.0,0.942,1.0	0.019	chr9:66947697-66948639(+)	chr9:66947697-66948641(+)
ENSMUSG00000079363	Gbp4	chr5	-	105125516	105125750	105125516	105125626	105135066	105135190	887	110	240	0	20	274	150	1	1	0.215,0.12,NA	NA,0.0,NA	0.167	chr5:105125750-105135067(-)	chr5:105125626-105135067(-)
ENSMUSG00000032478	Nme6	chr9	+	109835269	109835414	109835317	109835414	109833195	109833295	888	3284	302196104	3209	115504287	198	150	0.00485986	0.0867777	0.074,0.03,0.028	0.019,0.029,0.023	0.02	chr9:109833295-109835270(+)	chr9:109833295-109835318(+)
ENSMUSG00000032478	Nme6	chr9	+	109841926	109842087	109841961	109842087	109841475	109841515	889	543354197	320	164822534	50	185	150	1	1	0.993,0.993,1.0	1.0,0.993,1.0	-0.002	chr9:109841515-109841927(+)	chr9:109841515-109841962(+)
ENSMUSG00000047539	Fbxo28	chr1	-	182317809	182318005	182317809	182317958	182326253	182326392	890	269201129	500	93337194	539	197	150	0.00584114	0.100291	0.976,1.0,1.0	0.934,0.988,0.943	0.037	chr1:182318005-182326254(-)	chr1:182317958-182326254(-)
ENSMUSG00000034573	Ptpn13	chr5	+	103523566	103523789	103523569	103523789	103517487	103517569	895	492	22	565	0	153	150	0.109125	0.562036	1.0,0.815,0.495	1.0,1.0,1.0	-0.23	chr5:103517569-103523567(+)	chr5:103517569-103523570(+)
ENSMUSG00000043940	Wdfy3	chr5	-	101886960	101887070	101886960	101887067	101888086	101888316	897	14414569	1561	5022878	3136	153	150	0.812614	1	0.904,0.96,0.985	0.942,0.945,0.927	0.012	chr5:101887070-101888087(-)	chr5:101887067-101888087(-)
ENSMUSG00000043940	Wdfy3	chr5	-	101923855	101924103	101923855	101924087	101926423	101926536	898	30	20115656	0	61196119	166	150	1	1	0.0,0.017,0.0	0.0,0.0,0.0	0.006	chr5:101924103-101926424(-)	chr5:101924087-101926424(-)
ENSMUSG00000009687	Fxyd5	chr7	-	31037820	31037931	31037820	31037928	31039037	31039094	900	491270142	1489851520	129698464	45022831414	153	150	0.996698	1	0.244,0.237,0.211	0.219,0.231,0.243	0	chr7:31037931-31039038(-)	chr7:31037928-31039038(-)
ENSMUSG00000009687	Fxyd5	chr7	-	31040182	31040257	31040182	31040221	31041396	31041457	901	24671379940	283010	77035212182	198256	186	150	0.00115252	0.0343436	0.986,0.974,0.987	0.97,0.972,0.969	0.012	chr7:31040257-31041397(-)	chr7:31040221-31041397(-)
ENSMUSG00000009687	Fxyd5	chr7	-	31040182	31040272	31040182	31040221	31041396	31041457	902	485334201	283010	144722470	198256	201	150	0.000593704	0.0207978	0.928,0.893,0.938	0.85,0.868,0.862	0.06	chr7:31040272-31041397(-)	chr7:31040221-31041397(-)
ENSMUSG00000009687	Fxyd5	chr7	-	31040182	31040272	31040182	31040257	31041396	31041457	903	583730	20401082769	1510562	64129021774	165	150	0.82817	1	0.025,0.03,0.034	0.021,0.032,0.031	0.002	chr7:31040272-31041397(-)	chr7:31040257-31041397(-)
ENSMUSG00000009687	Fxyd5	chr7	-	31041396	31041469	31041396	31041457	31042046	31042078	904	575120	100	2410457	70	162	150	0.12946	0.610577	0.981,1.0,1.0	1.0,0.932,1.0	0.016	chr7:31041469-31042047(-)	chr7:31041457-31042047(-)
ENSMUSG00000059939	9430015G10Rik	chr4	+	156121932	156122416	156122350	156122416	156119163	156119239	906	21418681	16177	45285189	42714	300	150	0.873466	1	0.87,0.845,0.853	0.849,0.841,0.871	0.002	chr4:156119239-156121933(+)	chr4:156119239-156122351(+)
ENSMUSG00000032267	Usp28	chr9	+	49023905	49024085	49023980	49024085	49018371	49018467	909	20021091	0	66345169	30	225	150	1	1	1.0,1.0,1.0	1.0,0.987,1.0	0.004	chr9:49018467-49023906(+)	chr9:49018467-49023981(+)
ENSMUSG00000014418	Hps5	chr7	-	46767093	46767207	46767093	46767139	46768032	46768152	910	24724175	441	95328144	82	218	150	0.905137	1	0.977,0.976,0.981	1.0,0.966,0.98	-0.004	chr7:46767207-46768033(-)	chr7:46767139-46768033(-)
ENSMUSG00000014418	Hps5	chr7	-	46778020	46778199	46778020	46778100	46779071	46779160	911	17917372	30158	5624788	52018	249	150	0.735106	1	0.782,0.874,0.844	0.871,0.882,0.747	0	chr7:46778199-46779072(-)	chr7:46778100-46779072(-)
ENSMUSG00000014418	Hps5	chr7	-	46783470	46783717	46783470	46783683	46786509	46786643	912	28344	19015070	82916	43267116	184	150	0.328293	0.977002	0.107,0.156,0.045	0.132,0.081,0.101	-0.002	chr7:46783717-46786510(-)	chr7:46783683-46786510(-)
ENSMUSG00000086968	4933431E20Rik	chr3	-	107894050	107894228	107894050	107894215	107894588	107894656	913	652	21	229	152	163	150	0.0257986	0.243483	1.0,0.697,0.648	0.648,0.269,0.805	0.208	chr3:107894228-107894589(-)	chr3:107894215-107894589(-)
ENSMUSG00000086968	4933431E20Rik	chr3	-	107894050	107894228	107894050	107894208	107894860	107894992	914	3132	110	41	10	170	150	1	1	0.726,0.92,1.0	NA,0.779,1.0	-0.007	chr3:107894228-107894861(-)	chr3:107894208-107894861(-)
ENSMUSG00000022679	Mpv17l	chr16	+	13946528	13946587	13946557	13946587	13944665	13944736	916	112	2366	12	22211	179	150	0.547032	1	0.035,0.123,0.218	0.0,0.037,0.132	0.069	chr16:13944736-13946529(+)	chr16:13944736-13946558(+)
ENSMUSG00000027329	Spef1	chr2	-	131171901	131172025	131171901	131171949	131172203	131172258	918	664920	220	95036	61	226	150	0.172442	0.720161	0.956,0.942,1.0	1.0,0.847,0.96	0.03	chr2:131172025-131172204(-)	chr2:131171949-131172204(-)
ENSMUSG00000058013	Sept11	chr5	+	93173469	93173537	93173472	93173537	93167499	93167687	919	477	20	1117	30	153	150	0.713464	1	1.0,0.774,1.0	1.0,0.782,1.0	-0.003	chr5:93167687-93173470(+)	chr5:93167687-93173473(+)
ENSMUSG00000029547	Ints1	chr5	-	139771536	139771729	139771536	139771723	139771815	139771921	920	26622389	468394187	83250184	148582329	156	150	0.466899	1	0.353,0.352,0.314	0.35,0.292,0.35	0.009	chr5:139771729-139771816(-)	chr5:139771723-139771816(-)
ENSMUSG00000029415	Sdad1	chr5	-	92298191	92298261	92298191	92298258	92300061	92300163	921	608399217	582	204817461	1610	153	150	0.881508	1	0.992,0.98,0.991	0.995,0.993,0.978	-0.001	chr5:92298261-92300062(-)	chr5:92298258-92300062(-)
ENSMUSG00000036810	Cnep1r1	chr8	+	88130340	88130401	88130346	88130401	88129694	88129804	925	20	35824296	10	116417243	156	150	1	1	0.0,0.008,0.0	0.0,0.002,0.0	0.002	chr8:88129804-88130341(+)	chr8:88129804-88130347(+)
ENSMUSG00000029370	Rassf6	chr5	-	90608798	90608992	90608798	90608953	90609714	90609812	926	210	200	102	0	189	150	1	1	0.442,1.0,NA	1.0,NA,1.0	-0.279	chr5:90608992-90609715(-)	chr5:90608953-90609715(-)
ENSMUSG00000035505	Cox18	chr5	-	90218911	90219036	90218911	90219033	90219359	90219523	930	673629	535927	1610667	197860	153	150	0.351174	1	0.553,0.374,0.513	0.452,0.571,0.523	-0.035	chr5:90219036-90219360(-)	chr5:90219033-90219360(-)
ENSMUSG00000052512	Nav2	chr7	+	49461908	49462017	49461911	49462017	49458095	49458208	933	19019075	848430	5315987	189843	153	150	0.39527	1	0.689,0.689,0.71	0.743,0.614,0.665	0.022	chr7:49458208-49461909(+)	chr7:49458208-49461912(+)
ENSMUSG00000048012	Zfp473	chr7	-	44737965	44738034	44737965	44738031	44739502	44739635	942	1287	234	1014	62	153	150	1	1	0.855,0.723,0.632	NA,0.62,0.873	-0.01	chr7:44738034-44739503(-)	chr7:44738031-44739503(-)
ENSMUSG00000026883	Dab2ip	chr2	+	35719852	35720741	35719918	35720741	35718759	35718938	943	11810575	9137	2616886	11116	216	150	0.626397	1	0.901,0.849,0.882	0.621,0.914,0.909	0.063	chr2:35718938-35719853(+)	chr2:35718938-35719919(+)
ENSMUSG00000066232	Ipo7	chr7	+	110042785	110042885	110042828	110042885	110041980	110042115	946	17341384625	1125	54024081342	4413	193	150	0.01519	0.176921	0.992,0.998,0.99	1.0,0.977,0.988	0.005	chr7:110042115-110042786(+)	chr7:110042115-110042829(+)
ENSMUSG00000029086	Prom1	chr5	-	44055877	44056083	44055877	44056068	44063125	44063184	948	615390249	1	2631097565	2	165	150	1	1	1.0,1.0,0.996	1.0,1.0,0.996	0	chr5:44056083-44063126(-)	chr5:44056068-44063126(-)
ENSMUSG00000029428	Stx2	chr5	-	128996361	128996461	128996361	128996457	128999509	128999587	949	28624874	10	85435236	434	154	150	0.781079	1	1.0,0.996,1.0	0.954,0.993,0.983	0.022	chr5:128996461-128999510(-)	chr5:128996457-128999510(-)
ENSMUSG00000051727	Kctd14	chr7	+	97454856	97454977	97454889	97454977	97453203	97453462	951	2393	102	9257	0	183	150	0.846669	1	0.95,1.0,0.551	1.0,1.0,1.0	-0.166	chr7:97453462-97454857(+)	chr7:97453462-97454890(+)
ENSMUSG00000043411	Usp48	chr4	+	137615712	137615841	137615715	137615841	137613681	137613861	953	287293124	20318275	133410197	86273141	153	150	0.733369	1	0.581,0.612,0.618	0.603,0.596,0.578	0.011	chr4:137613861-137615713(+)	chr4:137613861-137615716(+)
ENSMUSG00000043411	Usp48	chr4	+	137625156	137625287	137625159	137625287	137623273	137623388	954	13010050	358350119	6114768	122447237	153	150	0.845516	1	0.263,0.219,0.292	0.329,0.244,0.22	-0.006	chr4:137623388-137625157(+)	chr4:137623388-137625160(+)
ENSMUSG00000043411	Usp48	chr4	+	137637759	137637890	137637764	137637890	137634897	137635008	955	286257108	464215	135433217	185643	155	150	0.808503	1	0.857,0.856,0.874	0.879,0.882,0.83	-0.001	chr4:137635008-137637760(+)	chr4:137635008-137637765(+)
ENSMUSG00000043411	Usp48	chr4	+	137655158	137655249	137655222	137655249	137652957	137653006	957	152310	633483187	52615	192720426	214	150	0.721964	1	0.016,0.032,0.036	0.018,0.025,0.024	0.006	chr4:137653006-137655159(+)	chr4:137653006-137655223(+)
ENSMUSG00000025199	Chuk	chr19	-	44078888	44079266	44078888	44078985	44081945	44081995	958	628838	1589849	2611244	49247139	300	150	0.0219369	0.221737	0.164,0.31,0.279	0.21,0.185,0.137	0.074	chr19:44079266-44081946(-)	chr19:44078985-44081946(-)
ENSMUSG00000025533	Asl	chr5	-	130013400	130013533	130013400	130013515	130013962	130014025	961	963	270237113	132	75481255	168	150	0.013945	0.168848	0.029,0.022,0.023	0.012,0.006,0.007	0.016	chr5:130013533-130013963(-)	chr5:130013515-130013963(-)
ENSMUSG00000070733	Fryl	chr5	-	73068723	73068914	73068723	73068911	73069882	73070004	962	26117583	24209	82320149	84114	153	150	0.652289	1	0.914,0.896,0.9	0.909,0.884,0.913	0.001	chr5:73068914-73069883(-)	chr5:73068911-73069883(-)
ENSMUSG00000070733	Fryl	chr5	-	73071104	73071309	73071104	73071306	73072735	73072921	963	341266112	13411042	110362209	3818962	153	150	0.950114	1	0.714,0.703,0.723	0.739,0.653,0.768	-0.007	chr5:73071309-73072736(-)	chr5:73071306-73072736(-)
ENSMUSG00000040950	Mgl2	chr11	+	70135048	70135162	70135051	70135162	70134118	70134263	964	18712373	349258159	60236133	121516249	153	150	0.937047	1	0.344,0.319,0.31	0.327,0.31,0.344	-0.003	chr11:70134263-70135049(+)	chr11:70134263-70135052(+)
ENSMUSG00000029209	Gnpda2	chr5	-	69579507	69579692	69579507	69579686	69584973	69585156	967	948336	2287	46182112	3123	156	150	8.04166e-05	0.00559139	0.804,0.909,0.832	0.936,0.936,0.973	-0.1	chr5:69579692-69584974(-)	chr5:69579686-69584974(-)
ENSMUSG00000029209	Gnpda2	chr5	-	69579507	69582293	69579507	69579686	69584973	69585156	968	32188	2287	75020	3123	300	150	0.00964771	0.137069	0.421,0.529,0.364	0.538,0.676,0.769	-0.223	chr5:69582293-69584974(-)	chr5:69579686-69584974(-)
ENSMUSG00000029209	Gnpda2	chr5	-	69579507	69582293	69579507	69579692	69584973	69585156	969	27144	897932	73510	46167102	300	150	0.218346	0.80871	0.132,0.081,0.059	0.071,0.095,0.047	0.02	chr5:69582293-69584974(-)	chr5:69579692-69584974(-)
ENSMUSG00000052656	Rnf103	chr6	+	71508685	71510881	71508868	71510881	71505733	71505849	973	34266	1308158	63111	3412692	300	150	0.252538	0.868089	0.116,0.138,0.049	0.081,0.11,0.056	0.019	chr6:71505849-71508686(+)	chr6:71505849-71508869(+)
ENSMUSG00000029207	Apbb2	chr5	-	66310999	66311083	66310999	66311080	66312158	66312246	975	1161	20	133	100	153	150	1	1	1.0,0.746,1.0	0.0,1.0,1.0	0.249	chr5:66311083-66312159(-)	chr5:66311080-66312159(-)
ENSMUSG00000029207	Apbb2	chr5	-	66399621	66400284	66399621	66400281	66451467	66452283	976	100	632	45	134	153	150	5.07383e-05	0.00401445	0.14,0.0,0.0	0.0,0.567,0.551	-0.326	chr5:66400284-66451468(-)	chr5:66400281-66451468(-)
ENSMUSG00000029191	Rfc1	chr5	-	65278710	65278823	65278710	65278820	65279456	65279814	977	316251103	355258143	97462261	109465259	153	150	0.32432	0.968948	0.466,0.488,0.414	0.466,0.493,0.497	-0.029	chr5:65278823-65279457(-)	chr5:65278820-65279457(-)
ENSMUSG00000029191	Rfc1	chr5	-	65301932	65302052	65301932	65302010	65302975	65303208	978	8146	539409172	445	184786401	192	150	0.0248769	0.238829	0.011,0.026,0.027	0.017,0.004,0.01	0.011	chr5:65302052-65302976(-)	chr5:65302010-65302976(-)
ENSMUSG00000003545	Fosb	chr7	-	19307119	19307440	19307119	19307323	19309305	19310046	980	260803120	0	171557253	200	267	150	1	1	1.0,1.0,1.0	0.98,1.0,1.0	0.007	chr7:19307440-19309306(-)	chr7:19307323-19309306(-)
ENSMUSG00000042831	Alkbh6	chr7	+	30309985	30310054	30310027	30310054	30309480	30309559	981	309238112	22	94441213	150	192	150	1	1	1.0,0.989,0.978	0.987,0.986,1.0	-0.002	chr7:30309559-30309986(+)	chr7:30309559-30310028(+)
ENSMUSG00000042831	Alkbh6	chr7	+	30312505	30312707	30312590	30312707	30312236	30312388	982	1057137	18111962	2812274	44228143	235	150	0.587087	1	0.27,0.276,0.276	0.289,0.255,0.248	0.01	chr7:30312388-30312506(+)	chr7:30312388-30312591(+)
ENSMUSG00000032727	Mier3	chr13	+	111711685	111711780	111711688	111711780	111709725	111709807	988	24420599	282718	109368197	33920	153	150	0.0470825	0.348487	0.895,0.882,0.844	0.973,0.902,0.906	-0.053	chr13:111709807-111711686(+)	chr13:111709807-111711689(+)
ENSMUSG00000005339	Fcer1a	chr1	-	173225299	173225557	173225299	173225514	173226726	173226747	989	12914290	200	34313101	22	193	150	1	1	0.98,1.0,1.0	1.0,0.992,0.975	0.004	chr1:173225557-173226727(-)	chr1:173225514-173226727(-)
ENSMUSG00000029169	Dhx15	chr5	-	52157454	52157577	52157454	52157569	52160229	52160421	992	21231442852	585735	74731761720	197766	158	150	0.246755	0.86071	0.972,0.96,0.959	0.974,0.975,0.961	-0.006	chr5:52157577-52160230(-)	chr5:52157569-52160230(-)
ENSMUSG00000017264	Exosc10	chr4	+	148581757	148581834	148581761	148581834	148581101	148581163	994	524406199	973	217712452	61	154	150	0.208574	0.790376	0.983,0.983,0.985	1.0,0.991,0.998	-0.013	chr4:148581163-148581758(+)	chr4:148581163-148581762(+)
ENSMUSG00000025609	Mkln1	chr6	+	31432935	31433131	31432938	31433131	31431139	31431249	996	502423	359388127	125222	123615326	153	150	0.065618	0.419969	0.12,0.057,0.151	0.087,0.077,0.062	0.034	chr6:31431249-31432936(+)	chr6:31431249-31432939(+)
ENSMUSG00000039753	Fbxl5	chr5	-	43760706	43760855	43760706	43760852	43762816	43762942	998	24016590	314	79367198	102	153	150	0.668081	1	0.987,0.994,0.957	1.0,0.973,0.99	-0.008	chr5:43760855-43762817(-)	chr5:43760852-43762817(-)
ENSMUSG00000030091	Nup210	chr6	-	91013069	91014496	91013069	91013316	91015823	91015907	1000	421531471596	21416574	130657253048	5023995	300	150	0.00744076	0.116937	0.908,0.905,0.915	0.929,0.923,0.941	-0.022	chr6:91014496-91015824(-)	chr6:91013316-91015824(-)
ENSMUSG00000030091	Nup210	chr6	-	91060561	91060735	91060561	91060603	91062717	91062939	1002	412230801535	1214	109053562679	1315	282	150	1	1	0.995,0.999,0.995	1.0,0.995,0.99	0.001	chr6:91060735-91062718(-)	chr6:91060603-91062718(-)
ENSMUSG00000033082	Clec1a	chr6	-	129429891	129430010	129429891	129429958	129432121	129432273	1004	80	200	25	30	202	150	1	1	0.0,1.0,NA	NA,0.331,1.0	-0.165	chr6:129430010-129432122(-)	chr6:129429958-129432122(-)
ENSMUSG00000020097	Sgpl1	chr10	-	61101680	61102063	61101680	61101801	61102567	61102714	1005	18127	483311172	111811	164589298	300	150	0.930751	1	0.018,0.019,0.02	0.032,0.015,0.018	-0.003	chr10:61102063-61102568(-)	chr10:61101801-61102568(-)
ENSMUSG00000029102	Hgfac	chr5	+	35045211	35045506	35045250	35045506	35044763	35044849	1006	200	2	10	0	189	150	1	1	1.0,NA,0.0	NA,1.0,NA	-0.5	chr5:35044849-35045212(+)	chr5:35044849-35045251(+)
ENSMUSG00000029915	Clec5a	chr6	-	40579372	40579479	40579372	40579476	40581799	40581936	1007	517313237	1024	175985449	3128	153	150	1	1	0.981,0.994,0.983	0.983,0.988,0.982	0.002	chr6:40579479-40581800(-)	chr6:40579476-40581800(-)
ENSMUSG00000037224	Zfyve28	chr5	-	34236002	34236158	34236002	34236140	34243172	34243313	1009	1	400	2	22	168	150	1	1	0.0,NA,1.0	NA,0.0,0.472	0.264	chr5:34236158-34243173(-)	chr5:34236140-34243173(-)
ENSMUSG00000004642	Slbp	chr5	-	33645499	33646069	33645499	33645637	33649742	33649847	1010	18971293680	293416	67628491663	92720	300	150	0.00101293	0.0311705	0.97,0.95,0.955	0.974,0.981,0.977	-0.019	chr5:33646069-33649743(-)	chr5:33645637-33649743(-)
ENSMUSG00000037373	Ctbp1	chr5	-	33247753	33248686	33247753	33248683	33249106	33249224	1012	1036678385	21315670	3781458883	62286165	153	150	0.315568	0.959292	0.827,0.81,0.844	0.857,0.833,0.84	-0.016	chr5:33248686-33249107(-)	chr5:33248683-33249107(-)
ENSMUSG00000041870	Ankrd13a	chr5	+	114797852	114797914	114797854	114797914	114796833	114796915	1019	376928671196	320	129349683145	252	152	150	1	1	0.999,0.999,1.0	0.998,0.999,0.999	0.001	chr5:114796915-114797853(+)	chr5:114796915-114797855(+)
ENSMUSG00000041870	Ankrd13a	chr5	+	114798517	114798651	114798520	114798651	114797852	114797914	1020	532453230	398031901369	164705510	143551163340	153	150	0.463678	1	0.116,0.122,0.141	0.101,0.119,0.13	0.01	chr5:114797914-114798518(+)	chr5:114797914-114798521(+)
ENSMUSG00000006169	Clint1	chr11	+	45907839	45908044	45907893	45908044	45906180	45906467	1023	785633289	17141136620	225750478	68324261378	204	150	1.24687e-05	0.00163482	0.252,0.291,0.255	0.195,0.185,0.203	0.072	chr11:45906467-45907840(+)	chr11:45906467-45907894(+)
ENSMUSG00000039178	Tbc1d19	chr5	+	53838126	53838237	53838176	53838237	53837923	53837970	1024	1288338	470	61189113	14	200	150	0.019225	0.202348	0.96,0.899,1.0	1.0,0.993,0.955	-0.03	chr5:53837970-53838127(+)	chr5:53837970-53838177(+)
ENSMUSG00000029149	Krtcap3	chr5	+	31253093	31253197	31253097	31253197	31252894	31253002	1026	222316	1183	96726	42120	154	150	0.401382	1	0.661,0.737,0.839	0.687,0.757,0.559	0.078	chr5:31253002-31253094(+)	chr5:31253002-31253098(+)
ENSMUSG00000029145	Eif2b4	chr5	-	31192152	31192288	31192152	31192284	31192581	31192625	1027	383289151	200	174671396	11	154	150	1	1	0.995,1.0,1.0	1.0,0.998,0.997	0	chr5:31192288-31192582(-)	chr5:31192284-31192582(-)
ENSMUSG00000029145	Eif2b4	chr5	-	31192581	31192770	31192581	31192625	31192992	31193139	1028	997336	23016593	3512359	94435236	295	150	0.00609808	0.102506	0.18,0.184,0.164	0.159,0.126,0.113	0.043	chr5:31192770-31192993(-)	chr5:31192625-31192993(-)
ENSMUSG00000029177	Cenpa	chr5	+	30669691	30669828	30669737	30669828	30668998	30669052	1030	33623399	0	89454285	20	196	150	1	1	1.0,1.0,1.0	1.0,0.994,1.0	0.002	chr5:30669052-30669692(+)	chr5:30669052-30669738(+)
ENSMUSG00000029177	Cenpa	chr5	+	30673266	30673443	30673292	30673443	30672981	30673059	1032	45338	1388936458	206538	44917171084	176	150	0.180846	0.737075	0.027,0.029,0.015	0.037,0.031,0.029	-0.009	chr5:30673059-30673267(+)	chr5:30673059-30673293(+)
ENSMUSG00000030000	Add2	chr6	+	86082711	86082813	86082714	86082813	86078056	86078114	1034	526716	11148	267667	101118	153	150	0.846306	1	0.823,0.824,0.662	0.718,0.871,0.785	-0.022	chr6:86078114-86082712(+)	chr6:86078114-86082715(+)
ENSMUSG00000046329	Slc25a23	chr17	-	57053783	57053955	57053783	57053942	57055273	57055385	1044	210	14213254	1	2712587	163	150	1	1	0.013,0.007,0.0	0.0,0.0,0.01	0.003	chr17:57053955-57055274(-)	chr17:57053942-57055274(-)
ENSMUSG00000038642	Ctss	chr3	+	95529433	95529560	95529436	95529560	95526785	95526925	1045	531623	293143103	154617	89450194	153	150	0.0149804	0.176216	0.151,0.099,0.18	0.142,0.091,0.079	0.039	chr3:95526925-95529434(+)	chr3:95526925-95529437(+)
ENSMUSG00000028959	Fastk	chr5	-	24441335	24441465	24441335	24441450	24441527	24441663	1047	1498	272202111	22111	96490255	165	150	0.347424	0.999854	0.045,0.039,0.061	0.019,0.037,0.038	0.017	chr5:24441465-24441528(-)	chr5:24441450-24441528(-)
ENSMUSG00000044328	Trp53i13	chr11	-	77509075	77509367	77509075	77509273	77509597	77509726	1048	871	564914	122	134945	244	150	0.00943235	0.135518	0.081,0.081,0.042	0.045,0.024,0.027	0.036	chr11:77509367-77509598(-)	chr11:77509273-77509598(-)
ENSMUSG00000057541	Pus7	chr5	-	23748755	23748922	23748755	23748843	23749804	23749866	1051	393012	353217105	34636	113506266	229	150	0.216242	0.805314	0.067,0.083,0.07	0.017,0.056,0.081	0.022	chr5:23748922-23749805(-)	chr5:23748843-23749805(-)
ENSMUSG00000020231	Dip2a	chr10	-	76279705	76279816	76279705	76279786	76279856	76279966	1053	20	542819	0	93913	180	150	1	1	0.0,0.056,0.0	0.0,0.0,0.0	0.019	chr10:76279816-76279857(-)	chr10:76279786-76279857(-)
ENSMUSG00000020231	Dip2a	chr10	-	76286361	76286488	76286361	76286442	76287312	76287449	1054	300	261422	210	84634	196	150	0.69644	1	0.081,0.0,0.0	0.161,0.016,0.0	-0.032	chr10:76286488-76287313(-)	chr10:76286442-76287313(-)
ENSMUSG00000029012	Orc5	chr5	-	22546397	22546598	22546397	22546504	22547923	22548016	1057	473403125	1392	187666399	2236	244	150	0.821348	1	0.957,0.965,0.975	0.983,0.947,0.976	-0.003	chr5:22546598-22547924(-)	chr5:22546504-22547924(-)
ENSMUSG00000037313	Tacc3	chr5	+	33667042	33667167	33667063	33667167	33666692	33666745	1058	555732	1105786422	228145	38316571046	171	150	0.0703765	0.438206	0.042,0.06,0.062	0.048,0.041,0.036	0.013	chr5:33666745-33667043(+)	chr5:33666745-33667064(+)
ENSMUSG00000037313	Tacc3	chr5	+	33671664	33671785	33671725	33671785	33671403	33671510	1059	19221200690	725527	61325781625	3611777	211	150	0.183617	0.73819	0.95,0.939,0.948	0.924,0.94,0.938	0.012	chr5:33671510-33671665(+)	chr5:33671510-33671726(+)
ENSMUSG00000089809	Rasgef1b	chr5	-	99234475	99234691	99234475	99234688	99240822	99240960	1061	13133	1985	22715	6177	153	150	0.540993	1	0.401,0.614,0.37	0.246,0.609,0.678	-0.049	chr5:99234691-99240823(-)	chr5:99234688-99240823(-)
ENSMUSG00000028150	Rorc	chr3	+	94390399	94391206	94391073	94391206	94389474	94389596	1068	200	0	0	12	300	150	1	1	1.0,NA,NA	NA,0.0,0.0	1	chr3:94389596-94390400(+)	chr3:94389596-94391074(+)
ENSMUSG00000028864	Hgf	chr5	+	16572491	16572634	16572506	16572634	16566746	16566861	1069	12310542	282120	5817995	54118	165	150	0.145974	0.655457	0.8,0.82,0.656	0.913,0.799,0.828	-0.088	chr5:16566861-16572492(+)	chr5:16566861-16572507(+)
ENSMUSG00000045411	2410002F23Rik	chr7	+	44247237	44247416	44247250	44247416	44246786	44246823	1070	1288255	322113	64225132	76117	163	150	0.197067	0.768996	0.786,0.782,0.796	0.894,0.772,0.877	-0.06	chr7:44246823-44247238(+)	chr7:44246823-44247251(+)
ENSMUSG00000054099	Slc25a40	chr5	+	8430411	8430518	8430430	8430518	8428628	8428688	1074	603910	331	158447	36	169	150	0.579043	1	0.947,0.92,0.899	1.0,0.961,0.874	-0.023	chr5:8428688-8430412(+)	chr5:8428688-8430431(+)
ENSMUSG00000020807	4933427D14Rik	chr11	-	72169780	72169859	72169780	72169843	72175202	72175292	1081	897546	20	3711864	42	166	150	0.665074	1	1.0,0.971,1.0	1.0,0.964,0.967	0.013	chr11:72169859-72175203(-)	chr11:72169843-72175203(-)
ENSMUSG00000060771	Tsga10	chr1	-	37841184	37841352	37841184	37841308	37842454	37842520	1082	41429	550	125027	2134	194	150	0.0782387	0.465677	0.864,0.867,1.0	0.823,0.748,0.839	0.107	chr1:37841352-37842455(-)	chr1:37841308-37842455(-)
ENSMUSG00000021709	Erbin	chr13	-	103824719	103824926	103824719	103824848	103827906	103828023	1084	872775307	381615	3261351708	153829	228	150	0.973572	1	0.938,0.97,0.931	0.935,0.959,0.941	0.001	chr13:103824926-103827907(-)	chr13:103824848-103827907(-)
ENSMUSG00000000600	Krit1	chr5	+	3806418	3806568	3806464	3806568	3803183	3803483	1087	23016792	966933	70299221	2813868	196	150	0.833097	1	0.647,0.649,0.681	0.657,0.624,0.713	-0.006	chr5:3803483-3806419(+)	chr5:3803483-3806465(+)
ENSMUSG00000058503	Fam133b	chr5	+	3559096	3559159	3559137	3559159	3558660	3558693	1089	381274113	664025	138549267	177633	191	150	0.0920312	0.51468	0.819,0.843,0.78	0.864,0.85,0.864	-0.045	chr5:3558693-3559097(+)	chr5:3558693-3559138(+)
ENSMUSG00000041954	Tnfrsf18	chr4	+	156028220	156028891	156028494	156028891	156027961	156028049	1093	474136	102	239355	0	300	150	0.518577	1	0.959,1.0,0.9	1.0,1.0,1.0	-0.047	chr4:156028049-156028221(+)	chr4:156028049-156028495(+)
ENSMUSG00000029075	Tnfrsf4	chr4	+	156015299	156015452	156015385	156015452	156014901	156015009	1095	1082	464	74	159	236	150	0.229275	0.827155	0.614,0.459,0.241	0.0,0.471,0.22	0.208	chr4:156015009-156015300(+)	chr4:156015009-156015386(+)
ENSMUSG00000029036	Atad3a	chr4	-	155750472	155750598	155750472	155750593	155750867	155750924	1097	595383219	200	192820426	0	155	150	1	1	0.997,1.0,1.0	1.0,1.0,1.0	-0.001	chr4:155750598-155750868(-)	chr4:155750593-155750868(-)
ENSMUSG00000029036	Atad3a	chr4	-	155753566	155753769	155753566	155753636	155753881	155754047	1098	57278	741582278	103821	2851047640	283	150	0.0103466	0.143527	0.039,0.024,0.015	0.018,0.019,0.017	0.008	chr4:155753769-155753882(-)	chr4:155753636-155753882(-)
ENSMUSG00000029036	Atad3a	chr4	-	155753881	155754138	155753881	155754047	155754756	155754826	1099	302811	911704350	74319	3321266747	241	150	0.348694	1	0.02,0.024,0.019	0.013,0.021,0.016	0.004	chr4:155754138-155754757(-)	chr4:155754047-155754757(-)
ENSMUSG00000029036	Atad3a	chr4	-	155754756	155754852	155754756	155754826	155755678	155755738	1100	474320	850694281	295625	3161190735	176	150	0.252139	0.868089	0.045,0.05,0.057	0.073,0.039,0.028	0.004	chr4:155754852-155755679(-)	chr4:155754826-155755679(-)
ENSMUSG00000029056	Pank4	chr4	+	154977202	154977354	154977211	154977354	154976582	154976670	1104	310301120	0	113417272	13	159	150	1	1	1.0,1.0,1.0	1.0,0.997,0.988	0.005	chr4:154976670-154977203(+)	chr4:154976670-154977212(+)
ENSMUSG00000029056	Pank4	chr4	+	154978920	154979025	154978954	154979025	154978392	154978442	1105	18115037	1589572	55191113	59207132	184	150	0.645322	1	0.483,0.563,0.295	0.432,0.429,0.411	0.023	chr4:154978442-154978921(+)	chr4:154978442-154978955(+)
ENSMUSG00000036826	Igflr1	chr7	+	30567142	30567500	30567145	30567500	30566748	30566936	1112	25177	30	142723	1	153	150	0.792767	1	1.0,0.847,1.0	1.0,1.0,0.958	-0.037	chr7:30566936-30567143(+)	chr7:30566936-30567146(+)
ENSMUSG00000039852	Rere	chr4	+	150619000	150619205	150619024	150619205	150618405	150618552	1114	313720	329237106	74140	67386214	174	150	0.94425	1	0.075,0.119,0.14	0.083,0.084,0.139	0.009	chr4:150618552-150619001(+)	chr4:150618552-150619025(+)
ENSMUSG00000039936	Pik3cd	chr4	-	149654022	149654138	149654022	149654135	149654224	149654403	1116	968042	553395248	1915866	187957461	153	150	0.104272	0.548505	0.145,0.166,0.142	0.091,0.139,0.123	0.033	chr4:149654138-149654225(-)	chr4:149654135-149654225(-)
ENSMUSG00000039936	Pik3cd	chr4	-	149655126	149655257	149655126	149655248	149655335	149655500	1117	739638	565432222	2714664	173997459	159	150	0.244872	0.856491	0.109,0.173,0.139	0.128,0.121,0.116	0.019	chr4:149655257-149655336(-)	chr4:149655248-149655336(-)
ENSMUSG00000039936	Pik3cd	chr4	-	149655335	149655503	149655335	149655500	149655580	149655631	1118	660443256	974733	171978436	2114265	153	150	0.452876	1	0.87,0.902,0.884	0.889,0.871,0.868	0.009	chr4:149655503-149655581(-)	chr4:149655500-149655581(-)
ENSMUSG00000039936	Pik3cd	chr4	-	149657245	149657467	149657245	149657455	149658381	149658471	1119	716444278	1473	2051037513	2138	162	150	0.468351	1	0.979,0.983,0.988	0.99,0.987,0.983	-0.003	chr4:149657467-149658382(-)	chr4:149657455-149658382(-)
ENSMUSG00000018861	Fdxr	chr11	-	115271876	115271999	115271876	115271975	115272186	115272282	1120	20015879	122	79271133	50	174	150	1	1	0.994,0.986,0.971	1.0,0.979,1.0	-0.009	chr11:115271999-115272187(-)	chr11:115271975-115272187(-)
ENSMUSG00000028960	Ube4b	chr4	-	149335111	149335335	149335111	149335303	149337384	149337519	1121	313	559454217	12	185695419	182	150	1	1	0.004,0.002,0.011	0.0,0.001,0.004	0.004	chr4:149335335-149337385(-)	chr4:149335303-149337385(-)
ENSMUSG00000034940	Synrg	chr11	+	83977079	83977201	83977082	83977201	83971551	83971592	1124	944333	312219	177947	85732	153	150	0.062471	0.408375	0.748,0.657,0.63	0.676,0.576,0.59	0.064	chr11:83971592-83977080(+)	chr11:83971592-83977083(+)
ENSMUSG00000034940	Synrg	chr11	+	84019359	84019953	84019590	84019953	84008617	84009550	1125	1996	22118597	82510	67372161	300	150	0.746069	1	0.041,0.024,0.03	0.056,0.033,0.03	-0.008	chr11:84009550-84019360(+)	chr11:84009550-84019591(+)
ENSMUSG00000041459	Tardbp	chr4	-	148612381	148617705	148612381	148617635	148618664	148618791	1126	13841013489	201411	48619071056	155218	220	150	0.0230568	0.226569	0.979,0.98,0.968	0.957,0.962,0.976	0.011	chr4:148617705-148618665(-)	chr4:148617635-148618665(-)
ENSMUSG00000041459	Tardbp	chr4	-	148617565	148617737	148617565	148617635	148618664	148618791	1127	15791139538	201411	51721561143	155218	252	150	0.0175257	0.192526	0.979,0.98,0.967	0.954,0.961,0.974	0.012	chr4:148617737-148618665(-)	chr4:148617635-148618665(-)
ENSMUSG00000041459	Tardbp	chr4	-	148617565	148617825	148617565	148617635	148618664	148618791	1128	18571319622	201411	57324941305	155218	300	150	0.0135394	0.165236	0.979,0.979,0.966	0.95,0.96,0.973	0.014	chr4:148617825-148618665(-)	chr4:148617635-148618665(-)
ENSMUSG00000041459	Tardbp	chr4	-	148617565	148617737	148617565	148617705	148618664	148618791	1129	28716869	823820	68364147	3510156	182	150	0.0879149	0.499864	0.743,0.785,0.74	0.616,0.748,0.684	0.073	chr4:148617737-148618665(-)	chr4:148617705-148618665(-)
ENSMUSG00000041459	Tardbp	chr4	-	148617565	148617825	148617565	148617705	148618664	148618791	1130	727450196	823820	164940425	3510156	270	150	0.0681786	0.429768	0.831,0.868,0.845	0.722,0.838,0.808	0.059	chr4:148617825-148618665(-)	chr4:148617705-148618665(-)
ENSMUSG00000041459	Tardbp	chr4	-	148617565	148617825	148617565	148617737	148618664	148618791	1131	465295145	110	112624299	81	238	150	0.774277	1	0.997,0.995,1.0	1.0,0.98,0.995	0.006	chr4:148617825-148618665(-)	chr4:148617737-148618665(-)
ENSMUSG00000041459	Tardbp	chr4	-	148617565	148617825	148617565	148617705	148618673	148618791	1134	689436192	393716	152926424	117638	270	150	0.331017	0.980656	0.908,0.867,0.87	0.885,0.871,0.861	0.009	chr4:148617825-148618674(-)	chr4:148617705-148618674(-)
ENSMUSG00000029003	Mad2l2	chr4	+	148145103	148145196	148145125	148145196	148144653	148144727	1137	288231101	1586	147350218	6239	172	150	0.639202	1	0.944,0.962,0.936	0.955,0.93,0.955	0.001	chr4:148144727-148145104(+)	chr4:148144727-148145126(+)
ENSMUSG00000034867	Ankrd27	chr7	+	35601489	35601646	35601505	35601646	35600314	35600425	1140	403328181	411	175672359	3	166	150	1	1	0.989,0.997,0.994	1.0,1.0,0.991	-0.004	chr7:35600425-35601490(+)	chr7:35600425-35601506(+)
ENSMUSG00000003033	Ap1m1	chr8	+	72249088	72249180	72249112	72249180	72246638	72246795	1143	6132	660542270	294	2721030617	174	150	0.92321	1	0.008,0.02,0.006	0.006,0.007,0.006	0.005	chr8:72246795-72249089(+)	chr8:72246795-72249113(+)
ENSMUSG00000048000	Gigyf2	chr1	+	87406983	87407201	87407001	87407201	87403666	87403846	1144	284217101	17714251	88408248	4418583	168	150	0.00474272	0.0850169	0.589,0.577,0.639	0.641,0.663,0.727	-0.075	chr1:87403846-87406984(+)	chr1:87403846-87407002(+)
ENSMUSG00000048000	Gigyf2	chr1	+	87407534	87407723	87407537	87407723	87407292	87407455	1145	298240125	30169	106429212	143120	153	150	0.715169	1	0.907,0.936,0.932	0.881,0.931,0.912	0.017	chr1:87407455-87407535(+)	chr1:87407455-87407538(+)
ENSMUSG00000048000	Gigyf2	chr1	+	87440359	87440612	87440387	87440612	87436768	87436891	1146	472	21120183	179	84298172	178	150	0.671452	1	0.016,0.029,0.02	0.01,0.019,0.042	-0.002	chr1:87436891-87440360(+)	chr1:87436891-87440388(+)
ENSMUSG00000042709	Atpaf2	chr11	-	60405775	60405877	60405775	60405856	60407293	60407391	1147	606221	247185101	287653	100426206	171	150	0.226488	0.824884	0.176,0.227,0.154	0.197,0.135,0.184	0.014	chr11:60405877-60407294(-)	chr11:60405856-60407294(-)
ENSMUSG00000006389	Mpl	chr4	-	118455644	118455943	118455644	118455763	118456675	118456854	1148	1389233	19167	25159119	32024	300	150	0.962699	1	0.784,0.742,0.702	0.806,0.799,0.713	-0.03	chr4:118455943-118456676(-)	chr4:118455763-118456676(-)
ENSMUSG00000046862	Pramef8	chr4	+	143416619	143416952	143416639	143416952	143415348	143415413	1150	1	2778	200	8436	170	150	1	1	0.0,0.0,0.099	0.181,0.0,0.0	-0.027	chr4:143415413-143416620(+)	chr4:143415413-143416640(+)
ENSMUSG00000040606	Kazn	chr4	-	142147017	142147148	142147017	142147145	142150845	142151035	1151	222	751	331	83	153	150	0.452677	1	0.219,0.282,0.662	1.0,0.269,0.246	-0.117	chr4:142147148-142150846(-)	chr4:142147145-142150846(-)
ENSMUSG00000031166	Wdr13	chrX	-	8131384	8131625	8131384	8131591	8132286	8132366	1153	1388154	322	5823387	41410	184	150	0.00188481	0.0462534	0.974,0.971,0.957	0.922,0.931,0.876	0.058	chrX:8131625-8132287(-)	chrX:8131591-8132287(-)
ENSMUSG00000006215	Zbtb17	chr4	+	141466347	141466557	141466398	141466557	141465976	141466107	1157	306276103	0	99463243	34	201	150	1	1	1.0,1.0,1.0	1.0,0.991,0.978	0.01	chr4:141466107-141466348(+)	chr4:141466107-141466399(+)
ENSMUSG00000040842	Szrd1	chr4	-	141118526	141118781	141118526	141118778	141120323	141120373	1158	623379185	966243	125781450	3813467	153	150	0.643777	1	0.864,0.857,0.808	0.763,0.851,0.868	0.016	chr4:141118781-141120324(-)	chr4:141118778-141120324(-)
ENSMUSG00000040842	Szrd1	chr4	-	141118526	141118781	141118526	141118778	141139691	141139775	1159	518348196	1406349	152833496	4116186	153	150	0.200347	0.773458	0.784,0.844,0.797	0.784,0.835,0.85	-0.015	chr4:141118781-141139692(-)	chr4:141118778-141139692(-)
ENSMUSG00000028923	Necap2	chr4	-	141071580	141071717	141071580	141071695	141072528	141072637	1160	251510	27294	112828	103318	172	150	0.668124	1	0.447,0.311,0.686	0.49,0.425,0.576	-0.016	chr4:141071717-141072529(-)	chr4:141071695-141072529(-)
ENSMUSG00000036622	Atp13a2	chr4	+	140999127	140999283	140999234	140999283	140996667	140996799	1164	722547226	270	192833525	70	257	150	1	1	0.995,0.979,1.0	1.0,0.986,1.0	-0.004	chr4:140996799-140999128(+)	chr4:140996799-140999235(+)
ENSMUSG00000036622	Atp13a2	chr4	+	141006678	141006848	141006752	141006848	141006351	141006503	1168	26914465	16011444	64255185	37189160	224	150	0.449793	1	0.53,0.458,0.497	0.537,0.475,0.436	0.012	chr4:141006503-141006679(+)	chr4:141006503-141006753(+)
ENSMUSG00000020817	Rabep1	chr11	+	70935120	70935182	70935126	70935182	70934404	70934594	1170	460	16012740	92	51226153	156	150	0.869802	1	0.023,0.043,0.0	0.0,0.037,0.012	0.006	chr11:70934594-70935121(+)	chr11:70934594-70935127(+)
ENSMUSG00000051811	Cox6b2	chr7	-	4752060	4752172	4752060	4752161	4752723	4752849	1172	252610	540427201	64226	177789468	161	150	0.914135	1	0.041,0.054,0.044	0.031,0.047,0.049	0.004	chr7:4752172-4752724(-)	chr7:4752161-4752724(-)
ENSMUSG00000078517	Emc1	chr4	+	139365185	139365394	139365194	139365394	139363656	139363779	1175	545	625545257	12512	212804456	159	150	0.00226811	0.0525675	0.007,0.007,0.018	0.004,0.028,0.024	-0.008	chr4:139363779-139365186(+)	chr4:139363779-139365195(+)
ENSMUSG00000078517	Emc1	chr4	+	139364922	139365394	139365194	139365394	139364330	139364339	1176	273219	0	105827	10	300	150	1	1	1.0,1.0,1.0	1.0,0.967,1.0	0.011	chr4:139364339-139364923(+)	chr4:139364339-139365195(+)
ENSMUSG00000028741	Mrto4	chr4	-	139349613	139349847	139349613	139349717	139350435	139350494	1177	937224	1418891479	4110245	44719051339	280	150	0.0701994	0.437697	0.034,0.041,0.026	0.047,0.028,0.018	0.003	chr4:139349847-139350436(-)	chr4:139349717-139350436(-)
ENSMUSG00000035632	Cnot3	chr7	+	3653144	3653419	3653196	3653419	3652032	3652128	1178	391912	18714867	83317	43199100	202	150	0.926387	1	0.134,0.087,0.117	0.121,0.11,0.112	-0.002	chr7:3652128-3653145(+)	chr7:3652128-3653197(+)
ENSMUSG00000035632	Cnot3	chr7	+	3653144	3653419	3653199	3653419	3652032	3652128	1179	442414	681607264	104321	214925527	205	150	0.358448	1	0.045,0.028,0.037	0.033,0.033,0.028	0.005	chr7:3652128-3653145(+)	chr7:3652128-3653200(+)
ENSMUSG00000035632	Cnot3	chr7	+	3653196	3653419	3653199	3653419	3652032	3652128	1180	19215369	681607264	45209104	214925527	153	150	0.0577562	0.390919	0.217,0.198,0.204	0.171,0.181,0.162	0.035	chr7:3652128-3653197(+)	chr7:3652128-3653200(+)
ENSMUSG00000060862	Zbtb40	chr4	-	136988547	136988765	136988547	136988762	136991497	136991662	1183	6122	477219	1210	328239	153	150	0.913025	1	0.111,0.14,0.094	0.0,0.125,0.201	0.006	chr4:136988765-136991498(-)	chr4:136988762-136991498(-)
ENSMUSG00000050106	Tmc8	chr11	+	117784109	117784195	117784112	117784195	117783770	117783920	1184	552621	351914	107029	76128	153	150	0.223706	0.819958	0.606,0.573,0.595	0.583,0.529,0.504	0.053	chr11:117783920-117784110(+)	chr11:117783920-117784113(+)
ENSMUSG00000029822	Osbpl3	chr6	-	50336214	50336345	50336214	50336329	50344873	50345030	1185	1169247	1142	4616892	111	166	150	0.156576	0.684965	0.905,0.954,0.955	1.0,0.932,0.988	-0.035	chr6:50336345-50344874(-)	chr6:50336329-50344874(-)
ENSMUSG00000028671	Gale	chr4	+	135966253	135966546	135966369	135966546	135966002	135966116	1187	331612	1025743	113418	39195122	266	150	0.0192715	0.202373	0.154,0.137,0.136	0.137,0.09,0.077	0.041	chr4:135966116-135966254(+)	chr4:135966116-135966370(+)
ENSMUSG00000037266	Rsrp1	chr4	+	134926025	134926818	134926734	134926818	134925776	134925821	1192	538355190	2357	209940376	1911430	300	150	9.68292e-10	7.93155e-07	0.921,0.973,0.931	0.846,0.805,0.862	0.104	chr4:134925821-134926026(+)	chr4:134925821-134926735(+)
ENSMUSG00000063052	Lrrc40	chr3	+	158041585	158041659	158041619	158041659	158040440	158040622	1193	21918184	620	98386203	320	184	150	0.768473	1	0.967,0.987,1.0	0.964,0.994,1.0	-0.001	chr3:158040622-158041586(+)	chr3:158040622-158041620(+)
ENSMUSG00000012126	Ubxn11	chr4	+	134109090	134109119	134109093	134109119	134108251	134108355	1195	534227	0	186460	660	153	150	0.000129244	0.00750758	1.0,1.0,1.0	0.746,0.913,1.0	0.114	chr4:134108355-134109091(+)	chr4:134108355-134109094(+)
ENSMUSG00000012117	Dhdds	chr4	-	133994161	133994329	133994161	133994304	133996821	133996938	1197	1387	506382199	10155	157710408	175	150	0.818523	1	0.022,0.018,0.029	0.052,0.018,0.01	-0.004	chr4:133994329-133996822(-)	chr4:133994304-133996822(-)
ENSMUSG00000003644	Rps6ka1	chr4	-	133865360	133865431	133865360	133865398	133865762	133865905	1199	270218291154	28198	94438122093	133726	183	150	0.420553	1	0.988,0.987,0.992	0.983,0.988,0.985	0.004	chr4:133865431-133865763(-)	chr4:133865398-133865763(-)
ENSMUSG00000039987	Phtf2	chr5	-	20764213	20764470	20764213	20764309	20765757	20765913	1202	20203	1017434	102313	3614163	300	150	0.915028	1	0.09,0.119,0.042	0.122,0.075,0.094	-0.013	chr5:20764470-20765758(-)	chr5:20764309-20765758(-)
ENSMUSG00000028860	Sytl1	chr4	-	133257733	133257821	133257733	133257785	133258860	133258906	1203	21918890	0	89290130	11	186	150	1	1	1.0,1.0,1.0	1.0,0.996,0.991	0.004	chr4:133257821-133258861(-)	chr4:133257785-133258861(-)
ENSMUSG00000037692	Ahdc1	chr4	+	133060661	133060892	133060675	133060892	133055012	133055203	1206	561	34137	31	52311	164	150	0.0404395	0.321067	0.119,0.297,0.116	0.0,0.107,0.077	0.116	chr4:133055203-133060662(+)	chr4:133055203-133060676(+)
ENSMUSG00000037692	Ahdc1	chr4	+	133060661	133060892	133060780	133060892	133055012	133055203	1207	333415	45239	122928	94444	269	150	0.170656	0.719035	0.29,0.452,0.482	0.426,0.269,0.262	0.089	chr4:133055203-133060662(+)	chr4:133055203-133060781(+)
ENSMUSG00000037692	Ahdc1	chr4	+	133060675	133060892	133060780	133060892	133055012	133055203	1208	624321	45239	174938	94444	255	150	0.128964	0.61034	0.448,0.524,0.579	0.526,0.396,0.337	0.097	chr4:133055203-133060676(+)	chr4:133055203-133060781(+)
ENSMUSG00000007610	Gtpbp3	chr8	+	71489424	71489514	71489427	71489514	71489070	71489318	1209	342	1107541	562	2014846	153	150	0.313537	0.955394	0.026,0.05,0.046	0.197,0.038,0.041	-0.051	chr8:71489318-71489425(+)	chr8:71489318-71489428(+)
ENSMUSG00000007610	Gtpbp3	chr8	+	71490654	71490967	71490894	71490967	71490334	71490537	1210	934922	847632	199246	55208108	300	150	0.000227106	0.0109704	0.356,0.244,0.256	0.147,0.181,0.176	0.117	chr8:71490537-71490655(+)	chr8:71490537-71490895(+)
ENSMUSG00000026991	Pkp4	chr2	+	59308007	59308557	59308084	59308557	59305304	59305492	1213	239167119	8162	66289160	31812	227	150	0.357163	1	0.952,0.873,0.975	0.936,0.914,0.898	0.017	chr2:59305492-59308008(+)	chr2:59305492-59308085(+)
ENSMUSG00000026991	Pkp4	chr2	+	59308007	59308557	59308089	59308557	59305304	59305492	1214	250168120	501	66294160	284	232	150	0.0294361	0.264716	0.97,1.0,0.987	0.955,0.96,0.963	0.026	chr2:59305492-59308008(+)	chr2:59305492-59308090(+)
ENSMUSG00000026991	Pkp4	chr2	+	59308084	59308557	59308089	59308557	59305304	59305492	1215	19213	501	52314	284	155	150	0.0467936	0.347065	0.786,1.0,0.744	0.708,0.736,0.772	0.105	chr2:59305492-59308085(+)	chr2:59305492-59308090(+)
ENSMUSG00000026991	Pkp4	chr2	+	59311693	59311913	59311696	59311913	59310101	59310290	1216	13214263	14184	44185100	2248	153	150	0.8678	1	0.902,0.886,0.939	0.956,0.883,0.925	-0.012	chr2:59310290-59311694(+)	chr2:59310290-59311697(+)
ENSMUSG00000026816	Gtf3c5	chr2	-	28567607	28567802	28567607	28567784	28568484	28568627	1217	874	21015961	2173	64223143	168	150	0.797771	1	0.033,0.038,0.055	0.027,0.064,0.018	0.006	chr2:28567802-28568485(-)	chr2:28567784-28568485(-)
ENSMUSG00000028793	Rnf19b	chr4	+	129073498	129073643	129073501	129073643	129071736	129071942	1218	593524	383244123	209360	169550333	153	150	0.85033	1	0.131,0.123,0.161	0.104,0.142,0.15	0.006	chr4:129071942-129073499(+)	chr4:129071942-129073502(+)
ENSMUSG00000018819	Lsp1	chr7	+	142488847	142488940	142488865	142488940	142488418	142488515	1219	835387257	482244172	212877494	117495287	168	150	0.407715	1	0.607,0.586,0.572	0.618,0.613,0.606	-0.024	chr7:142488515-142488848(+)	chr7:142488515-142488866(+)
ENSMUSG00000018819	Lsp1	chr7	+	142494235	142494867	142494240	142494867	142490558	142490665	1222	1265606485	625518	3651520842	267548	155	150	0.83893	1	0.952,0.914,0.963	0.931,0.951,0.944	0.001	chr7:142490665-142494236(+)	chr7:142490665-142494241(+)
ENSMUSG00000061894	Zscan20	chr4	-	128589451	128590141	128589451	128589860	128591472	128591557	1223	706114	0	228053	31	300	150	0.402893	1	1.0,1.0,1.0	1.0,0.93,0.964	0.035	chr4:128590141-128591473(-)	chr4:128589860-128591473(-)
ENSMUSG00000042388	Dlgap3	chr4	+	127235384	127235528	127235417	127235528	127234967	127235059	1225	402	100	1	0	183	150	1	1	0.766,NA,1.0	NA,NA,1.0	-0.117	chr4:127235059-127235385(+)	chr4:127235059-127235418(+)
ENSMUSG00000057897	Camk2b	chr11	-	5982720	5982761	5982720	5982758	5988100	5988143	1226	38428	110	142332	2	153	150	1	1	0.974,0.976,1.0	1.0,1.0,0.94	0.003	chr11:5982761-5988101(-)	chr11:5982758-5988101(-)
ENSMUSG00000029560	Snx8	chr5	-	140355959	140356155	140355959	140356081	140358056	140358174	1227	402	1207555	453	3619983	224	150	0.198589	0.770449	0.022,0.0,0.024	0.069,0.017,0.024	-0.021	chr5:140356155-140358057(-)	chr5:140356081-140358057(-)
ENSMUSG00000041530	Ago1	chr4	-	126460366	126460585	126460366	126460503	126460905	126461087	1228	22255	21015967	63815	48226139	232	150	0.431785	1	0.063,0.092,0.046	0.075,0.098,0.065	-0.012	chr4:126460585-126460906(-)	chr4:126460503-126460906(-)
ENSMUSG00000000037	Scml2	chrX	+	161209194	161209269	161209197	161209269	161202013	161202097	1230	393814	412	196425	30	153	150	0.0442227	0.336937	0.905,0.974,0.873	1.0,0.954,1.0	-0.067	chrX:161202097-161209195(+)	chrX:161202097-161209198(+)
ENSMUSG00000000037	Scml2	chrX	+	161237479	161237757	161237491	161237757	161234612	161234696	1231	28156	200	95621	0	162	150	1	1	0.928,1.0,1.0	1.0,1.0,1.0	-0.024	chrX:161234696-161237480(+)	chrX:161234696-161237492(+)
ENSMUSG00000026766	Mmadhc	chr2	-	50292808	50292913	50292808	50292898	50296251	50296309	1232	1097137	371826	3217985	136531	165	150	0.87127	1	0.728,0.782,0.564	0.691,0.715,0.714	-0.015	chr2:50292913-50296252(-)	chr2:50292898-50296252(-)
ENSMUSG00000026766	Mmadhc	chr2	-	50292808	50292953	50292808	50292898	50296251	50296309	1233	655501239	371826	2101050570	136531	205	150	0.952553	1	0.928,0.953,0.871	0.922,0.922,0.931	-0.008	chr2:50292953-50296252(-)	chr2:50292898-50296252(-)
ENSMUSG00000026766	Mmadhc	chr2	-	50292808	50292953	50292808	50292913	50296251	50296309	1234	569442210	21128	183932505	56120	190	150	0.0320645	0.277727	0.955,0.967,0.954	0.967,0.923,0.952	0.011	chr2:50292953-50296252(-)	chr2:50292913-50296252(-)
ENSMUSG00000040464	Gtpbp10	chr5	-	5555237	5555406	5555237	5555382	5556064	5556156	1236	74	19511668	74	64256119	174	150	0.762556	1	0.0,0.049,0.048	0.0,0.023,0.028	0.015	chr5:5555406-5556065(-)	chr5:5555382-5556065(-)
ENSMUSG00000040464	Gtpbp10	chr5	-	5556064	5556156	5556064	5556154	5557212	5557406	1237	21416180	100	69311126	40	152	150	1	1	0.995,1.0,1.0	1.0,0.987,1.0	0.003	chr5:5556156-5557213(-)	chr5:5556154-5557213(-)
ENSMUSG00000058291	Zfp68	chr5	-	138616469	138616565	138616469	138616559	138617054	138617167	1238	12811548	371115	53196110	144439	156	150	0.271202	0.890232	0.769,0.91,0.755	0.784,0.811,0.731	0.036	chr5:138616565-138617055(-)	chr5:138616559-138617055(-)
ENSMUSG00000058291	Zfp68	chr5	-	138616469	138616614	138616469	138616559	138617054	138617167	1239	325211	371115	73722	144439	205	150	0.0686058	0.430687	0.388,0.776,0.349	0.268,0.381,0.292	0.191	chr5:138616614-138617055(-)	chr5:138616559-138617055(-)
ENSMUSG00000058291	Zfp68	chr5	-	138616469	138616614	138616469	138616565	138617054	138617167	1240	21377	11710044	31713	49176101	199	150	0.000328422	0.0137012	0.119,0.218,0.107	0.044,0.068,0.088	0.081	chr5:138616614-138617055(-)	chr5:138616565-138617055(-)
ENSMUSG00000036948	BC037034	chr5	-	138260834	138261716	138260834	138260989	138261801	138261884	1241	307280108	1136961	119521277	1614683	300	150	0.0763405	0.459243	0.576,0.67,0.47	0.788,0.641,0.625	-0.113	chr5:138261716-138261802(-)	chr5:138260989-138261802(-)
ENSMUSG00000030583	Sipa1l3	chr7	-	29331297	29331544	29331297	29331541	29332224	29332390	1243	857037	17319975	2111845	52302123	153	150	0.441484	1	0.325,0.256,0.326	0.284,0.277,0.264	0.027	chr7:29331544-29332225(-)	chr7:29331541-29332225(-)
ENSMUSG00000028581	Laptm5	chr4	+	130926740	130926847	130926751	130926847	130926104	130926198	1246	161	100	232	20	161	150	1	1	0.482,1.0,1.0	1.0,0.583,1.0	-0.034	chr4:130926198-130926741(+)	chr4:130926198-130926752(+)
ENSMUSG00000028581	Laptm5	chr4	+	130926740	130926847	130926770	130926847	130926104	130926198	1247	404512	443731261587	137534	143059523361	180	150	0.948819	1	0.007,0.012,0.006	0.008,0.01,0.008	0	chr4:130926198-130926741(+)	chr4:130926198-130926771(+)
ENSMUSG00000028581	Laptm5	chr4	+	130926751	130926847	130926770	130926847	130926104	130926198	1248	403911	443731261587	117432	143059523361	169	150	1	1	0.008,0.011,0.006	0.007,0.011,0.008	0	chr4:130926198-130926752(+)	chr4:130926198-130926771(+)
ENSMUSG00000031353	Rbbp7	chrX	+	162769763	162769937	162769790	162769937	162768851	162768997	1249	411328901405	19267	147355183462	73916	177	150	1	1	0.995,0.989,0.994	0.994,0.992,0.995	-0.001	chrX:162768997-162769764(+)	chrX:162768997-162769791(+)
ENSMUSG00000039156	Stim2	chr5	+	54110871	54111110	54111009	54111110	54110536	54110637	1250	482336185	322	162688309	232	288	150	1	1	0.988,0.989,0.98	0.977,0.992,0.988	0	chr5:54110637-54110872(+)	chr5:54110637-54111010(+)
ENSMUSG00000021109	Hif1a	chr12	+	73941687	73941852	73941729	73941852	73940347	73940631	1252	416359150	19715566	145872439	5925595	192	150	0.00150568	0.0397101	0.623,0.644,0.64	0.658,0.728,0.783	-0.087	chr12:73940631-73941688(+)	chr12:73940631-73941730(+)
ENSMUSG00000001517	Foxm1	chr6	+	128372530	128372603	128372533	128372603	128370956	128371085	1253	581	1154	234	61513	153	150	0.111189	0.568593	0.308,0.611,0.197	0.246,0.164,0.232	0.158	chr6:128371085-128372531(+)	chr6:128371085-128372534(+)
ENSMUSG00000001517	Foxm1	chr6	+	128372530	128372603	128372533	128372603	128371967	128372012	1254	354415	333181122	166132	86463298	153	150	0.445753	1	0.093,0.192,0.108	0.154,0.114,0.095	0.01	chr6:128372012-128372531(+)	chr6:128372012-128372534(+)
ENSMUSG00000064141	Zfp69	chr4	-	120934332	120934431	120934332	120934428	120935066	120935193	1255	230	581	40	131	153	150	0.52293	1	0.282,0.269,0.0	0.0,0.567,0.0	-0.005	chr4:120934431-120935067(-)	chr4:120934428-120935067(-)
ENSMUSG00000087385	Frg2f1	chr4	-	119533312	119533549	119533312	119533497	119533740	119533809	1256	7100	20	275	20	202	150	1	1	1.0,0.788,NA	1.0,0.722,1.0	-0.013	chr4:119533549-119533741(-)	chr4:119533497-119533741(-)
ENSMUSG00000060288	Ppih	chr4	-	119300009	119300202	119300009	119300183	119310758	119310847	1258	21511283	931656375	81284190	3081417920	169	150	0.720224	1	0.17,0.132,0.164	0.189,0.151,0.155	-0.01	chr4:119300202-119310759(-)	chr4:119300183-119310759(-)
ENSMUSG00000025735	Rhbdl1	chr17	-	25835276	25835377	25835276	25835353	25835469	25835582	1260	282210	760	82911	596	174	150	0.0893999	0.505208	0.775,0.76,1.0	0.58,0.735,0.612	0.203	chr17:25835377-25835470(-)	chr17:25835353-25835470(-)
ENSMUSG00000028641	P3h1	chr4	+	119241661	119241804	119241682	119241804	119241481	119241534	1261	340	929328	624	3415490	171	150	0.36114	1	0.028,0.036,0.0	0.134,0.011,0.038	-0.04	chr4:119241534-119241662(+)	chr4:119241534-119241683(+)
ENSMUSG00000048200	Cracr2b	chr7	+	141466008	141466613	141466045	141466613	141465765	141465837	1262	1895	12413162	2115	48225106	187	150	0.0119015	0.153416	0.104,0.052,0.061	0.032,0.038,0.036	0.037	chr7:141465837-141466009(+)	chr7:141465837-141466046(+)
ENSMUSG00000062822	4833420G17Rik	chr13	+	119465279	119466304	119466073	119466304	119464564	119464690	1264	246251104	1953	83380216	61011	300	150	0.835223	1	0.866,0.962,0.945	0.874,0.95,0.908	0.014	chr13:119464690-119465280(+)	chr13:119464690-119466074(+)
ENSMUSG00000033365	Ipo13	chr4	-	117894743	117894925	117894743	117894845	117895211	117895301	1266	386211134	642	100558257	6115	230	150	0.197686	0.76945	0.977,0.972,0.978	0.916,0.971,0.971	0.023	chr4:117894925-117895212(-)	chr4:117894845-117895212(-)
ENSMUSG00000004071	Cdip1	chr16	-	4768744	4769018	4768744	4768967	4769639	4769795	1267	22012972	0	63306188	21	201	150	1	1	1.0,1.0,1.0	1.0,0.991,0.993	0.005	chr16:4769018-4769640(-)	chr16:4768967-4769640(-)
ENSMUSG00000028681	Ptch2	chr4	+	117108154	117108302	117108159	117108302	117107898	117108020	1270	10612	0	22611	30	155	150	0.524423	1	1.0,1.0,1.0	1.0,0.893,1.0	0.036	chr4:117108020-117108155(+)	chr4:117108020-117108160(+)
ENSMUSG00000001472	Tcf25	chr8	+	123403146	123403806	123403149	123403806	123400624	123400697	1271	359255135	275201112	111542333	79403217	153	150	0.308406	0.950384	0.561,0.554,0.542	0.579,0.569,0.601	-0.031	chr8:123400697-123403147(+)	chr8:123400697-123403150(+)
ENSMUSG00000028688	Toe1	chr4	-	116805131	116805400	116805131	116805294	116805485	116805745	1273	531823	28715372	155347	82359194	256	150	0.98718	1	0.098,0.064,0.158	0.097,0.08,0.124	0.006	chr4:116805400-116805486(-)	chr4:116805294-116805486(-)
ENSMUSG00000033985	Tesk2	chr4	+	116801448	116801532	116801452	116801532	116801159	116801244	1274	1023847	732	4315067	212	154	150	0.00989744	0.138474	0.934,0.925,0.958	0.954,0.993,0.97	-0.033	chr4:116801244-116801449(+)	chr4:116801244-116801453(+)
ENSMUSG00000003810	Mast2	chr4	-	116306761	116308337	116306761	116308334	116308646	116308840	1275	1036336	244510	2314287	85620	153	150	0.615693	1	0.808,0.579,0.779	0.738,0.713,0.81	-0.032	chr4:116308337-116308647(-)	chr4:116308334-116308647(-)
ENSMUSG00000063882	Uqcrh	chr4	-	116069862	116070024	116069862	116069919	116070736	116070757	1281	847559443074	10218	3223129438106	172418	255	150	1	1	0.998,0.994,0.996	0.991,0.997,0.996	0.001	chr4:116070024-116070737(-)	chr4:116069919-116070737(-)
ENSMUSG00000002963	Pnkp	chr7	+	44859722	44859945	44859887	44859945	44858452	44858749	1283	18191050669	784	78527891479	2197	300	150	1	1	0.992,0.985,0.988	0.995,0.987,0.991	-0.003	chr7:44858749-44859723(+)	chr7:44858749-44859888(+)
ENSMUSG00000074221	Zfp568	chr7	+	30013839	30013889	30013842	30013889	29998114	29998210	1286	20815079	463629	60246146	303321	153	150	0.384226	1	0.816,0.803,0.728	0.662,0.88,0.872	-0.022	chr7:29998210-30013840(+)	chr7:29998210-30013843(+)
ENSMUSG00000028708	Mknk1	chr4	+	115874619	115874814	115874758	115874814	115873210	115873306	1289	480333189	20158	131691402	52922	289	150	0.743503	1	0.926,0.92,0.925	0.932,0.925,0.905	0.003	chr4:115873306-115874620(+)	chr4:115873306-115874759(+)
ENSMUSG00000028552	Eps15	chr4	+	109382784	109382966	109382846	109382966	109379866	109380029	1290	1173848408	442	44215791053	171	212	150	1	1	0.995,0.993,0.993	0.997,0.994,0.999	-0.003	chr4:109380029-109382785(+)	chr4:109380029-109382847(+)
ENSMUSG00000030718	Ppme1	chr7	-	100348121	100348179	100348121	100348175	100354708	100354801	1291	319245137	200	119478274	0	154	150	1	1	0.994,1.0,1.0	1.0,1.0,1.0	-0.002	chr7:100348179-100354709(-)	chr7:100348175-100354709(-)
ENSMUSG00000004952	Rasa4	chr5	+	136093137	136093267	136093144	136093267	136091747	136091809	1295	442287140	0	123620287	10	157	150	1	1	1.0,1.0,1.0	1.0,0.998,1.0	0.001	chr5:136091809-136093138(+)	chr5:136091809-136093145(+)
ENSMUSG00000004952	Rasa4	chr5	+	136103546	136104006	136103836	136104006	136103279	136103424	1298	464521	411256126	125940	127549244	300	150	0.334747	0.987245	0.053,0.081,0.077	0.045,0.051,0.076	0.013	chr5:136103424-136103547(+)	chr5:136103424-136103837(+)
ENSMUSG00000015733	Capza2	chr6	+	17660728	17660827	17660748	17660827	17657172	17657252	1300	352029	21661462751	76133	65531131906	170	150	0.54803	1	0.014,0.012,0.033	0.009,0.017,0.015	0.006	chr6:17657252-17660729(+)	chr6:17657252-17660749(+)
ENSMUSG00000028613	Lrp8	chr4	+	107847440	107847566	107847443	107847566	107843215	107843344	1301	27226	1218248	124633	31212109	153	150	0.321346	0.963732	0.179,0.208,0.109	0.275,0.175,0.229	-0.061	chr4:107843344-107847441(+)	chr4:107843344-107847444(+)
ENSMUSG00000034853	Acot11	chr4	-	106753713	106753875	106753713	106753797	106754073	106754140	1303	412	657022	120	165837	228	150	0.2816	0.902732	0.039,0.009,0.056	0.039,0.022,0.0	0.014	chr4:106753875-106754074(-)	chr4:106753797-106754074(-)
ENSMUSG00000079845	Xlr4a	chrX	-	73081473	73081601	73081473	73081588	73081984	73082067	1304	26336	440	102624	315	163	150	0.670608	1	0.857,0.884,1.0	0.754,0.96,0.815	0.071	chrX:73081601-73081985(-)	chrX:73081588-73081985(-)
ENSMUSG00000036817	Sun1	chr5	+	139226678	139226885	139226705	139226885	139226577	139226604	1306	9101	20820872	41511	76316183	177	150	0.373686	1	0.035,0.039,0.012	0.043,0.039,0.048	-0.015	chr5:139226604-139226679(+)	chr5:139226604-139226706(+)
ENSMUSG00000036817	Sun1	chr5	+	139238827	139238939	139238830	139238939	139237878	139237922	1307	210147100	766443	85281164	469970	153	150	0.819838	1	0.73,0.692,0.695	0.644,0.736,0.697	0.013	chr5:139237922-139238828(+)	chr5:139237922-139238831(+)
ENSMUSG00000028522	Mier1	chr4	+	103118238	103118315	103118241	103118315	103115559	103115660	1316	423517	24255	145129	14238	153	150	0.74789	1	0.632,0.579,0.769	0.495,0.685,0.78	0.007	chr4:103115660-103118239(+)	chr4:103115660-103118242(+)
ENSMUSG00000028522	Mier1	chr4	+	103118238	103118315	103118280	103118315	103115559	103115660	1317	695119	271712	228651	23020	192	150	0.313423	0.955394	0.666,0.701,0.553	0.896,0.691,0.666	-0.111	chr4:103115660-103118239(+)	chr4:103115660-103118281(+)
ENSMUSG00000028522	Mier1	chr4	+	103118241	103118315	103118280	103118315	103115559	103115660	1318	51417	271712	225830	23020	189	150	0.277897	0.899151	0.6,0.657,0.316	0.897,0.605,0.543	-0.157	chr4:103115660-103118242(+)	chr4:103115660-103118281(+)
ENSMUSG00000030759	Far1	chr7	+	113539272	113539466	113539276	113539466	113525987	113526038	1324	973704364	876934	3591498749	3613882	154	150	0.624433	1	0.916,0.909,0.912	0.907,0.914,0.899	0.006	chr7:113526038-113539273(+)	chr7:113526038-113539277(+)
ENSMUSG00000028556	Dock7	chr4	-	98953865	98953923	98953865	98953880	98955315	98955447	1329	110	20	10	20	193	150	1	1	1.0,0.28,NA	NA,0.28,NA	0.36	chr4:98953923-98955316(-)	chr4:98953880-98955316(-)
ENSMUSG00000061950	Ppp4r1	chr17	+	65803159	65803295	65803210	65803295	65783623	65783668	1330	20015567	11913163	46189106	50312187	201	150	1.77602e-05	0.00203754	0.556,0.469,0.442	0.407,0.311,0.297	0.151	chr17:65783668-65803160(+)	chr17:65783668-65803211(+)
ENSMUSG00000037366	Pafah2	chr4	+	134410778	134410972	134410903	134410972	134402969	134403104	1331	413516	412	83410	2138	275	150	9.79494e-05	0.00628577	0.848,0.95,0.814	0.686,0.588,0.405	0.311	chr4:134403104-134410779(+)	chr4:134403104-134410904(+)
ENSMUSG00000021218	Gdi2	chr13	+	3554411	3554546	3554441	3554546	3550988	3551088	1334	395225911311	643234	141153713374	99974	180	150	0.817669	1	0.981,0.985,0.97	0.992,0.978,0.974	-0.003	chr13:3551088-3554412(+)	chr13:3551088-3554442(+)
ENSMUSG00000031516	Dctn6	chr8	-	34104985	34105098	34104985	34105039	34106341	34106406	1335	39374	262313	24733	146016	209	150	0.523008	1	0.518,0.536,0.181	0.093,0.36,0.597	0.062	chr8:34105098-34106342(-)	chr8:34105039-34106342(-)
ENSMUSG00000004056	Akt2	chr7	+	27629295	27629427	27629334	27629427	27628836	27628990	1337	1072758370	440	3921476842	21	189	150	1	1	0.995,0.993,1.0	1.0,0.998,0.999	-0.003	chr7:27628990-27629296(+)	chr7:27628990-27629335(+)
ENSMUSG00000029238	Clock	chr5	-	76229357	76229563	76229357	76229560	76230164	76230359	1339	521621	22144	94023	73215	153	150	0.129277	0.61034	0.699,0.528,0.837	0.558,0.551,0.601	0.118	chr5:76229563-76230165(-)	chr5:76229560-76230165(-)
ENSMUSG00000029238	Clock	chr5	-	76254373	76254463	76254373	76254441	76262674	76262766	1340	322613	243	134113	40	172	150	0.0506753	0.362791	0.933,0.85,0.791	1.0,0.899,1.0	-0.108	chr5:76254463-76262675(-)	chr5:76254441-76262675(-)
ENSMUSG00000030177	Ccdc77	chr6	-	120341972	120342077	120341972	120342069	120348387	120348530	1341	24187	1059140	165011	3413086	158	150	0.168834	0.715668	0.178,0.158,0.142	0.309,0.267,0.108	-0.069	chr6:120342077-120348388(-)	chr6:120342069-120348388(-)
ENSMUSG00000030177	Ccdc77	chr6	-	120350206	120350444	120350206	120350390	120354000	120354054	1343	587131	16813458	40164122	4416866	204	150	2.03247e-06	0.000466349	0.202,0.28,0.282	0.401,0.418,0.576	-0.21	chr6:120350444-120354001(-)	chr6:120350390-120354001(-)
ENSMUSG00000031314	Taf1	chrX	+	101540759	101541001	101540822	101541001	101539067	101539187	1345	355328137	865035	104454193	43154113	213	150	1.13062e-05	0.00157225	0.744,0.822,0.734	0.63,0.675,0.546	0.15	chrX:101539187-101540760(+)	chrX:101539187-101540823(+)
ENSMUSG00000038070	Cntln	chr4	+	85063177	85063355	85063180	85063355	85049603	85050136	1346	17915562	304016	69212143	184628	153	150	0.99522	1	0.854,0.792,0.792	0.79,0.819,0.834	-0.002	chr4:85050136-85063178(+)	chr4:85050136-85063181(+)
ENSMUSG00000057098	Ebf1	chr11	+	44907903	44908037	44907906	44908037	44883813	44883955	1349	1241	1940	286	21616	153	150	0.325492	0.970554	0.382,0.495,1.0	0.495,0.329,0.269	0.261	chr11:44883955-44907904(+)	chr11:44883955-44907907(+)
ENSMUSG00000002983	Relb	chr7	-	19611816	19611925	19611816	19611885	19612504	19612720	1350	210	131511	1	32714	190	150	0.816096	1	0.108,0.05,0.0	0.0,0.0,0.053	0.035	chr7:19611925-19612505(-)	chr7:19611885-19612505(-)
ENSMUSG00000002983	Relb	chr7	-	19616345	19617403	19616345	19616437	19617761	19617919	1351	20	11108	251	21114	300	150	0.00494921	0.0879423	0.0,0.091,0.0	0.333,0.185,0.034	-0.154	chr7:19617403-19617762(-)	chr7:19616437-19617762(-)
ENSMUSG00000028484	Psip1	chr4	-	83461870	83462473	83461870	83462174	83463594	83463713	1352	27021163	10104	79410206	81610	300	150	0.620659	1	0.931,0.913,0.887	0.832,0.928,0.912	0.02	chr4:83462473-83463595(-)	chr4:83462174-83463595(-)
ENSMUSG00000028484	Psip1	chr4	-	83461870	83462553	83461870	83462174	83463594	83463713	1353	13912333	10104	5120193	81610	300	150	0.448485	1	0.874,0.86,0.805	0.761,0.863,0.823	0.031	chr4:83462553-83463595(-)	chr4:83462174-83463595(-)
ENSMUSG00000028484	Psip1	chr4	-	83461870	83462553	83461870	83462473	83463594	83463713	1354	696222	16112739	2814267	40261144	230	150	0.401842	1	0.218,0.241,0.269	0.313,0.262,0.233	-0.027	chr4:83462553-83463595(-)	chr4:83462473-83463595(-)
ENSMUSG00000086537	Nespas	chr2	-	174283255	174283424	174283255	174283406	174284459	174284665	1355	371	200	52	14	168	150	1	1	0.573,1.0,1.0	NA,0.817,0.309	0.295	chr2:174283424-174284460(-)	chr2:174283406-174284460(-)
ENSMUSG00000071068	Treml2	chr17	+	48307879	48308273	48308056	48308273	48302611	48302932	1356	938704393	534334200	36016181006	183855445	300	150	0.587802	1	0.468,0.513,0.496	0.496,0.486,0.531	-0.012	chr17:48302932-48307880(+)	chr17:48302932-48308057(+)
ENSMUSG00000063808	Gpatch1	chr7	-	35308178	35308339	35308178	35308331	35309300	35309386	1357	17014452	300	77254114	236	158	150	0.11342	0.571345	0.982,1.0,1.0	0.973,0.988,0.947	0.025	chr7:35308339-35309301(-)	chr7:35308331-35309301(-)
ENSMUSG00000038502	Ptov1	chr7	-	44864611	44864669	44864611	44864666	44864761	44864835	1361	778625266	0	2611012682	1	153	150	1	1	1.0,1.0,1.0	1.0,1.0,0.999	0	chr7:44864669-44864762(-)	chr7:44864666-44864762(-)
ENSMUSG00000038502	Ptov1	chr7	-	44865471	44865627	44865471	44865623	44866809	44866917	1363	784630271	300	2371050701	40	154	150	1	1	0.996,1.0,1.0	1.0,0.996,1.0	0	chr7:44865627-44866810(-)	chr7:44865623-44866810(-)
ENSMUSG00000025747	Tyms	chr5	-	30061967	30062049	30061967	30062039	30063235	30063411	1364	13711664	1231878496	45221140	50721351326	160	150	0.101233	0.541331	0.094,0.11,0.108	0.077,0.088,0.09	0.019	chr5:30062049-30063236(-)	chr5:30062039-30063236(-)
ENSMUSG00000025747	Tyms	chr5	-	30068465	30068640	30068465	30068538	30071633	30071707	1365	22061535861	1743	97835492319	3113	252	150	1	1	0.987,0.996,0.994	0.995,0.995,0.998	-0.004	chr5:30068640-30071634(-)	chr5:30068538-30071634(-)
ENSMUSG00000008305	Tle1	chr4	-	72138491	72138688	72138491	72138685	72139688	72139833	1366	664713	232	127847	298	153	150	0.0155762	0.180049	0.97,0.939,0.864	0.855,0.895,0.852	0.057	chr4:72138688-72139689(-)	chr4:72138685-72139689(-)
ENSMUSG00000051675	Trim32	chr4	+	65613128	65616238	65613131	65616238	65604985	65605069	1368	323511	1727	10483	1144	153	150	0.982856	1	0.649,0.945,0.606	0.907,0.771,0.424	0.033	chr4:65605069-65613129(+)	chr4:65605069-65613132(+)
ENSMUSG00000045917	Tmem268	chr4	+	63560881	63560995	63560911	63560995	63560226	63560405	1374	532	702	2915	2125	180	150	0.811721	1	0.373,1.0,0.455	0.455,0.385,0.714	0.091	chr4:63560405-63560882(+)	chr4:63560405-63560912(+)
ENSMUSG00000030881	Arfip2	chr7	-	105638208	105638344	105638208	105638327	105639008	105639105	1376	223	23113788	42	79388224	167	150	0.949427	1	0.008,0.013,0.03	0.0,0.009,0.008	0.011	chr7:105638344-105639009(-)	chr7:105638327-105639009(-)
ENSMUSG00000030881	Arfip2	chr7	-	105639008	105639105	105639008	105639093	105639324	105639465	1377	22016875	20	92322201	0	162	150	1	1	1.0,0.987,1.0	1.0,1.0,1.0	-0.004	chr7:105639105-105639325(-)	chr7:105639093-105639325(-)
ENSMUSG00000030881	Arfip2	chr7	-	105639008	105639189	105639008	105639093	105639324	105639465	1378	522012	20	146944	0	246	150	1	1	1.0,0.859,1.0	1.0,1.0,1.0	-0.047	chr7:105639189-105639325(-)	chr7:105639093-105639325(-)
ENSMUSG00000030881	Arfip2	chr7	-	105639008	105639189	105639008	105639105	105639324	105639465	1379	25156	19316369	64221	84295178	234	150	0.505176	1	0.077,0.056,0.053	0.044,0.084,0.07	-0.004	chr7:105639189-105639325(-)	chr7:105639105-105639325(-)
ENSMUSG00000045672	Col27a1	chr4	+	63318191	63318315	63318261	63318315	63317983	63318037	1381	0	23	2	71	220	150	1	1	NA,0.0,0.0	NA,0.0,0.577	-0.288	chr4:63318037-63318192(+)	chr4:63318037-63318262(+)
ENSMUSG00000021000	Mia2	chr12	+	59170257	59170318	59170261	59170318	59168933	59169035	1385	743529250	200	3021060599	0	154	150	1	1	0.997,1.0,1.0	1.0,1.0,1.0	-0.001	chr12:59169035-59170258(+)	chr12:59169035-59170262(+)
ENSMUSG00000018995	Nars2	chr7	+	97031545	97031583	97031550	97031583	97031337	97031436	1387	14610342	9143	49216115	344	155	150	0.00103586	0.0312734	0.94,0.877,0.931	0.94,0.981,0.965	-0.046	chr7:97031436-97031546(+)	chr7:97031436-97031551(+)
ENSMUSG00000028391	Wdr31	chr4	-	62463343	62463476	62463343	62463473	62463926	62464069	1389	30245	100	72618	21	153	150	0.864769	1	0.967,1.0,1.0	1.0,0.927,0.946	0.031	chr4:62463476-62463927(-)	chr4:62463473-62463927(-)
ENSMUSG00000036955	Kif1bp	chr10	-	62563235	62563508	62563235	62563351	62566036	62566121	1390	846	21417484	7113	70284117	300	150	0.625744	1	0.018,0.011,0.034	0.048,0.019,0.013	-0.006	chr10:62563508-62566037(-)	chr10:62563351-62566037(-)
ENSMUSG00000034560	Washc4	chr10	+	83550880	83550948	83550886	83550948	83550263	83550309	1391	28325770	841	92335187	3114	156	150	0.348519	1	0.971,0.984,0.985	0.967,0.967,0.978	0.009	chr10:83550309-83550881(+)	chr10:83550309-83550887(+)
ENSMUSG00000034560	Washc4	chr10	+	83556000	83556116	83556012	83556116	83555572	83555615	1392	345911	310217101	125516	84376185	162	150	0.205296	0.783779	0.092,0.201,0.092	0.117,0.119,0.074	0.025	chr10:83555615-83556001(+)	chr10:83555615-83556013(+)
ENSMUSG00000020659	Cbll1	chr12	-	31492078	31492179	31492078	31492176	31494581	31494749	1393	30416197	293217	96317183	114326	153	150	0.761328	1	0.911,0.831,0.848	0.895,0.878,0.873	-0.019	chr12:31492179-31494582(-)	chr12:31492176-31494582(-)
ENSMUSG00000020659	Cbll1	chr12	-	31492078	31492179	31492078	31492176	31494590	31494749	1394	967725	311918	4612069	53225	153	150	0.213939	0.80144	0.752,0.799,0.577	0.9,0.786,0.73	-0.096	chr12:31492179-31494591(-)	chr12:31492176-31494591(-)
ENSMUSG00000007987	Ift22	chr5	+	136911688	136911891	136911806	136911891	136911301	136911391	1396	482336170	101	137589344	14	268	150	1	1	0.996,1.0,0.99	1.0,0.997,0.98	0.003	chr5:136911391-136911689(+)	chr5:136911391-136911807(+)
ENSMUSG00000020526	Znhit3	chr11	-	84913221	84913436	84913221	84913302	84914210	84914285	1398	252410	25614587	43623	74353209	284	150	0.329795	0.978933	0.049,0.08,0.057	0.028,0.051,0.055	0.017	chr11:84913436-84914211(-)	chr11:84913302-84914211(-)
ENSMUSG00000020526	Znhit3	chr11	-	84914210	84914383	84914210	84914285	84916098	84916130	1399	49367	300205116	44129	82463253	248	150	0.0149083	0.175872	0.09,0.096,0.035	0.029,0.051,0.065	0.025	chr11:84914383-84916099(-)	chr11:84914285-84916099(-)
ENSMUSG00000060743	H3f3a	chr1	-	180812689	180812786	180812689	180812746	180813470	180813603	1403	646428	140	2413440	4	190	150	0.471893	1	0.981,0.927,1.0	1.0,1.0,0.888	0.007	chr1:180812786-180813471(-)	chr1:180812746-180813471(-)
ENSMUSG00000021518	Ptdss1	chr13	+	66956381	66956506	66956440	66956506	66953519	66953564	1408	732532256	223	2721011577	21	209	150	1	1	0.996,0.995,0.984	1.0,0.997,0.998	-0.007	chr13:66953564-66956382(+)	chr13:66953564-66956441(+)
ENSMUSG00000071657	Bscl2	chr19	+	8846189	8846324	8846248	8846324	8845170	8845314	1410	668508253	100	2461011590	0	209	150	1	1	0.998,1.0,1.0	1.0,1.0,1.0	-0.001	chr19:8845314-8846190(+)	chr19:8845314-8846249(+)
ENSMUSG00000071657	Bscl2	chr19	+	8847666	8847982	8847913	8847982	8847405	8847547	1411	575415183	500	183889517	22	300	150	1	1	0.983,1.0,1.0	1.0,0.996,0.992	-0.002	chr19:8847547-8847667(+)	chr19:8847547-8847914(+)
ENSMUSG00000021906	Oxnad1	chr14	+	32099388	32099631	32099533	32099631	32096486	32096628	1415	31626598	686	98422230	31311	295	150	0.488024	1	0.964,0.944,0.893	0.943,0.943,0.914	0	chr14:32096628-32099389(+)	chr14:32096628-32099534(+)
ENSMUSG00000021906	Oxnad1	chr14	+	32100954	32101094	32100985	32101094	32099533	32099631	1416	211411	17413449	3119	53192120	181	150	0.0056524	0.0986268	0.091,0.08,0.157	0.045,0.045,0.059	0.06	chr14:32099631-32100955(+)	chr14:32099631-32100986(+)
ENSMUSG00000006345	Ggt1	chr10	+	75574228	75574396	75574231	75574396	75573610	75573748	1423	312	230	12	0	153	150	1	1	0.595,0.246,1.0	NA,1.0,1.0	-0.386	chr10:75573748-75574229(+)	chr10:75573748-75574232(+)
ENSMUSG00000056234	Ncoa4	chr14	+	32174389	32174533	32174392	32174533	32173400	32173490	1427	23181655888	19015261	81032311768	72237141	153	150	0.757495	1	0.923,0.914,0.935	0.917,0.93,0.925	0	chr14:32173490-32174390(+)	chr14:32173490-32174393(+)
ENSMUSG00000028345	Tex10	chr4	-	48459863	48460102	48459863	48459999	48462768	48462881	1428	575460192	312	200803391	61	253	150	1	1	0.991,0.996,0.983	1.0,0.988,0.996	-0.005	chr4:48460102-48462769(-)	chr4:48459999-48462769(-)
ENSMUSG00000026219	Trip12	chr1	-	84745012	84745185	84745012	84745170	84747177	84747329	1429	1058962375	1329954	3301577823	3015394	165	150	0.176636	0.729372	0.879,0.898,0.863	0.909,0.904,0.888	-0.02	chr1:84745185-84747178(-)	chr1:84745170-84747178(-)
ENSMUSG00000026219	Trip12	chr1	-	84758973	84759127	84758973	84759046	84760762	84760919	1430	13491060544	213215	5121936967	104729	231	150	0.657893	1	0.977,0.956,0.959	0.971,0.964,0.956	0	chr1:84759127-84760763(-)	chr1:84759046-84760763(-)
ENSMUSG00000035601	Trmt10b	chr4	+	45301201	45301344	45301235	45301344	45300433	45300627	1432	1541	13012446	694	3016296	184	150	0.968874	1	0.086,0.026,0.017	0.14,0.043,0.033	-0.029	chr4:45300627-45301202(+)	chr4:45300627-45301236(+)
ENSMUSG00000022351	Sqle	chr15	+	59322835	59322932	59322866	59322932	59321313	59321494	1433	200177115	60	69407202	34	181	150	0.933362	1	1.0,0.961,1.0	1.0,0.991,0.977	-0.002	chr15:59321494-59322836(+)	chr15:59321494-59322867(+)
ENSMUSG00000035683	Melk	chr4	+	44308905	44309049	44308947	44309049	44306989	44307106	1434	320225130	10	102386260	2	192	150	1	1	1.0,0.994,1.0	1.0,1.0,0.99	0.001	chr4:44307106-44308906(+)	chr4:44307106-44308948(+)
ENSMUSG00000021286	Zfyve21	chr12	+	111825575	111825632	111825578	111825632	111825016	111825108	1435	440	754	22	93	153	150	1	1	0.359,0.44,0.0	NA,0.179,0.395	-0.021	chr12:111825108-111825576(+)	chr12:111825108-111825579(+)
ENSMUSG00000028479	Gne	chr4	-	44041662	44041889	44041662	44041884	44042162	44042292	1436	473913	459383178	246226	167684307	155	150	0.914971	1	0.09,0.09,0.066	0.122,0.081,0.076	-0.011	chr4:44041889-44042163(-)	chr4:44041884-44042163(-)
ENSMUSG00000024184	Pdia2	chr17	-	26197616	26197754	26197616	26197745	26197831	26197965	1439	2214	20	31920	0	159	150	1	1	1.0,0.908,1.0	1.0,1.0,1.0	-0.031	chr17:26197754-26197832(-)	chr17:26197745-26197832(-)
ENSMUSG00000028470	Hint2	chr4	-	43654226	43654422	43654226	43654411	43654512	43654585	1441	932	393242115	3167	170572328	161	150	0.34093	0.994426	0.021,0.011,0.016	0.016,0.025,0.019	-0.004	chr4:43654422-43654513(-)	chr4:43654411-43654513(-)
ENSMUSG00000028470	Hint2	chr4	-	43654512	43654614	43654512	43654585	43654715	43654820	1442	2674	369262104	6126	148564323	179	150	0.00615464	0.102946	0.056,0.022,0.031	0.033,0.018,0.015	0.014	chr4:43654614-43654716(-)	chr4:43654585-43654716(-)
ENSMUSG00000051517	Arhgef39	chr4	-	43496141	43496720	43496141	43496717	43496820	43496909	1444	482340157	124	167619346	160	153	150	1	1	0.998,0.994,0.975	0.994,0.99,1.0	-0.006	chr4:43496720-43496821(-)	chr4:43496717-43496821(-)
ENSMUSG00000051517	Arhgef39	chr4	-	43497086	43497710	43497086	43497316	43497958	43498029	1445	343239118	353	128350278	25	300	150	0.204586	0.783023	0.983,0.96,0.952	1.0,0.989,0.965	-0.02	chr4:43497710-43497959(-)	chr4:43497316-43497959(-)
ENSMUSG00000028459	Cd72	chr4	-	43449451	43449549	43449451	43449528	43450069	43450221	1447	415614	513812	125419	205746	171	150	0.0504711	0.362682	0.414,0.564,0.506	0.345,0.454,0.266	0.14	chr4:43449549-43450070(-)	chr4:43449528-43450070(-)
ENSMUSG00000028456	Unc13b	chr4	+	43249456	43249581	43249459	43249581	43245467	43245596	1451	300	0	123	100	153	150	1	1	1.0,NA,NA	0.495,1.0,1.0	0.168	chr4:43245596-43249457(+)	chr4:43245596-43249460(+)
ENSMUSG00000033916	Chmp2a	chr7	-	13032434	13032821	13032434	13032565	13033828	13034042	1453	1252842418	2395	43218821075	21820	300	150	0.424715	1	0.965,0.979,0.977	0.991,0.981,0.964	-0.005	chr7:13032821-13033829(-)	chr7:13032565-13033829(-)
ENSMUSG00000040410	Fbxl4	chr4	+	22390676	22390921	22390713	22390921	22385906	22386252	1454	777328	242	359860	41411	187	150	0.000528834	0.0197022	0.969,0.936,0.918	0.875,0.849,0.814	0.095	chr4:22386252-22390677(+)	chr4:22386252-22390714(+)
ENSMUSG00000056553	Ptprn2	chr12	+	117255448	117255610	117255545	117255610	117253602	117253656	1455	0	1	20	0	247	150	1	1	NA,NA,0.0	NA,1.0,NA	-1	chr12:117253656-117255449(+)	chr12:117253656-117255546(+)
ENSMUSG00000028439	Fam219a	chr4	-	41517690	41520398	41517690	41520395	41520911	41520966	1458	452619	1050	116730	246	153	150	0.321524	0.963732	0.815,0.836,1.0	1.0,0.732,0.831	0.029	chr4:41520398-41520912(-)	chr4:41520395-41520912(-)
ENSMUSG00000051735	Rinl	chr7	+	28790289	28790411	28790325	28790411	28788968	28789005	1460	462523	11186	125022	92514	186	150	0.182484	0.73819	0.771,0.528,0.756	0.518,0.617,0.559	0.12	chr7:28789005-28790290(+)	chr7:28789005-28790326(+)
ENSMUSG00000051735	Rinl	chr7	+	28797809	28798954	28798511	28798954	28797559	28797723	1461	984681360	102	3511522829	10	300	150	1	1	0.998,1.0,0.989	1.0,0.999,1.0	-0.004	chr7:28797723-28797810(+)	chr7:28797723-28798512(+)
ENSMUSG00000028411	Aptx	chr4	-	40695376	40695423	40695376	40695418	40697216	40697353	1462	22116665	604224	75294203	379457	155	150	0.266773	0.885122	0.781,0.793,0.724	0.662,0.752,0.775	0.036	chr4:40695423-40697217(-)	chr4:40695418-40697217(-)
ENSMUSG00000040296	Ddx58	chr4	-	40227965	40228200	40227965	40228113	40229494	40229676	1463	1692	1057751	6814	4720086	237	150	0.382078	1	0.088,0.069,0.024	0.075,0.025,0.093	-0.004	chr4:40228200-40229495(-)	chr4:40228113-40229495(-)
ENSMUSG00000028292	Rars2	chr4	+	34630472	34630570	34630476	34630570	34625400	34625484	1465	30921988	20	97529253	62	154	150	1	1	1.0,0.991,1.0	1.0,0.988,0.992	0.004	chr4:34625484-34630473(+)	chr4:34625484-34630477(+)
ENSMUSG00000022386	Trmu	chr15	+	85892566	85892739	85892621	85892739	85890204	85890327	1467	836035	1191	2311181	296	205	150	0.310914	0.952297	0.847,0.83,0.962	0.894,0.9,0.908	-0.021	chr15:85890327-85892567(+)	chr15:85890327-85892622(+)
ENSMUSG00000020647	Ncoa1	chr12	-	4259211	4259395	4259211	4259309	4263433	4263608	1470	26617795	200	97300149	0	236	150	1	1	0.988,1.0,1.0	1.0,1.0,1.0	-0.004	chr12:4259395-4263434(-)	chr12:4259309-4263434(-)
ENSMUSG00000040865	Ino80d	chr1	-	63093284	63093531	63093284	63093440	63093639	63093730	1472	594529227	18912165	166616406	54219117	241	150	0.177218	0.73003	0.662,0.731,0.685	0.657,0.636,0.684	0.034	chr1:63093531-63093640(-)	chr1:63093440-63093640(-)
ENSMUSG00000006010	Odr4	chr1	-	150388522	150388657	150388522	150388619	150390235	150390356	1473	357271129	373615	132536274	175428	188	150	0.606967	1	0.885,0.857,0.873	0.861,0.888,0.886	-0.007	chr1:150388657-150390236(-)	chr1:150388619-150390236(-)
ENSMUSG00000028289	Epha7	chr4	+	28947527	28947653	28947539	28947653	28943322	28943378	1474	614415	478	147120	2192	162	150	0.665295	1	0.934,0.853,0.635	0.866,0.776,0.903	-0.041	chr4:28943378-28947528(+)	chr4:28943378-28947540(+)
ENSMUSG00000022199	Slc22a17	chr14	-	54907885	54908366	54907885	54908103	54908501	54908647	1479	33339	20	113622	0	300	150	1	1	1.0,0.892,1.0	1.0,1.0,1.0	-0.036	chr14:54908366-54908502(-)	chr14:54908103-54908502(-)
ENSMUSG00000022199	Slc22a17	chr14	-	54908822	54908988	54908822	54908863	54909670	54909825	1480	1492	1	206	1	275	150	1	1	1.0,1.0,0.522	NA,1.0,0.766	-0.042	chr14:54908988-54909671(-)	chr14:54908863-54909671(-)
ENSMUSG00000034349	Smc4	chr3	+	69007188	69007367	69007263	69007367	69006075	69006213	1481	276421351166	10	119641992508	0	225	150	1	1	1.0,0.999,1.0	1.0,1.0,1.0	0	chr3:69006213-69007189(+)	chr3:69006213-69007264(+)
ENSMUSG00000034349	Smc4	chr3	+	69027492	69027718	69027562	69027718	69025823	69025985	1485	27702076971	484420	104538712089	97024	220	150	0.0613646	0.405183	0.975,0.97,0.971	0.988,0.974,0.983	-0.01	chr3:69025985-69027493(+)	chr3:69025985-69027563(+)
ENSMUSG00000033191	Tie1	chr4	-	118474299	118474413	118474299	118474402	118475423	118475614	1487	1029128	400	3012460	20	161	150	0.821438	1	0.96,1.0,1.0	1.0,0.983,1.0	-0.008	chr4:118474413-118475424(-)	chr4:118474402-118475424(-)
ENSMUSG00000038147	Cd84	chr1	+	171884584	171884679	171884587	171884679	171873304	171873439	1490	371331133	758440	97494294	2110165	153	150	0.362832	1	0.829,0.794,0.765	0.819,0.827,0.816	-0.025	chr1:171873439-171884585(+)	chr1:171873439-171884588(+)
ENSMUSG00000035521	Gnptg	chr17	-	25235344	25235480	25235344	25235459	25235533	25235627	1494	1205	283222106	259	108455299	171	150	0.307519	0.950384	0.036,0.0,0.04	0.016,0.01,0.026	0.008	chr17:25235480-25235534(-)	chr17:25235459-25235534(-)
ENSMUSG00000031543	Ank1	chr8	+	23098920	23099019	23098924	23099019	23097845	23098043	1495	9311612	150	3710675	282	154	150	0.0881431	0.499986	0.989,0.958,1.0	0.947,0.928,0.973	0.033	chr8:23098043-23098921(+)	chr8:23098043-23098925(+)
ENSMUSG00000031543	Ank1	chr8	+	23115355	23115567	23115453	23115567	23114780	23114935	1496	15324367	40	109297197	1	248	150	1	1	1.0,0.974,1.0	1.0,1.0,0.992	-0.006	chr8:23114935-23115356(+)	chr8:23114935-23115454(+)
ENSMUSG00000031543	Ank1	chr8	+	23132096	23132634	23132561	23132634	23123831	23123978	1497	17518761	0	103209169	2	300	150	1	1	1.0,1.0,1.0	1.0,1.0,0.977	0.008	chr8:23123978-23132097(+)	chr8:23123978-23132562(+)
ENSMUSG00000029101	Rgs12	chr5	+	35025848	35026043	35025918	35026043	35024276	35024353	1499	317232106	0	97341202	110	220	150	1	1	1.0,1.0,1.0	0.985,0.996,1.0	0.006	chr5:35024353-35025849(+)	chr5:35024353-35025919(+)
ENSMUSG00000027346	Gpcpd1	chr2	-	132572184	132572257	132572184	132572254	132578067	132578248	1500	342813	1227528	215626	2916767	153	150	0.342824	0.995809	0.215,0.268,0.313	0.415,0.247,0.276	-0.047	chr2:132572257-132578068(-)	chr2:132572254-132578068(-)
ENSMUSG00000050382	Kif7	chr7	-	79702105	79702282	79702105	79702279	79702452	79702578	1502	41182	60	72914	20	153	150	0.125253	0.603127	1.0,0.746,1.0	1.0,0.934,1.0	-0.063	chr7:79702282-79702453(-)	chr7:79702279-79702453(-)
ENSMUSG00000007837	Prrg2	chr7	-	45060204	45060415	45060204	45060386	45060740	45060892	1505	330	272617	298	123527	179	150	0.00557406	0.0976312	0.085,0.088,0.0	0.123,0.177,0.199	-0.109	chr7:45060415-45060741(-)	chr7:45060386-45060741(-)
ENSMUSG00000052752	Traf7	chr17	-	24514712	24514866	24514712	24514829	24516504	24516596	1507	885931	565414202	2610845	196861492	187	150	0.0587929	0.395023	0.111,0.103,0.11	0.096,0.091,0.068	0.023	chr17:24514866-24516505(-)	chr17:24514829-24516505(-)
ENSMUSG00000052752	Traf7	chr17	-	24516504	24516599	24516504	24516596	24518741	24518794	1508	356254147	426280134	107438282	163612325	153	150	0.0611362	0.40484	0.45,0.471,0.518	0.392,0.412,0.46	0.058	chr17:24516599-24518742(-)	chr17:24516596-24518742(-)
ENSMUSG00000052752	Traf7	chr17	-	24518741	24518799	24518741	24518794	24519130	24519246	1511	533395221	242316	208788440	52721	155	150	0.0527563	0.370182	0.956,0.943,0.93	0.976,0.966,0.953	-0.022	chr17:24518799-24519131(-)	chr17:24518794-24519131(-)
ENSMUSG00000027014	Cwc22	chr2	-	77932698	77932766	77932698	77932763	77936592	77936722	1512	16515179	312244114	47249163	85424239	153	150	0.829214	1	0.341,0.378,0.405	0.352,0.365,0.401	0.002	chr2:77932766-77936593(-)	chr2:77932763-77936593(-)
ENSMUSG00000027263	Tubgcp4	chr2	+	121189823	121189965	121189826	121189965	121189361	121189469	1515	15510055	1359346	38173108	3914898	153	150	0.887206	1	0.53,0.513,0.54	0.489,0.534,0.519	0.014	chr2:121189469-121189824(+)	chr2:121189469-121189827(+)
ENSMUSG00000037470	Uggt1	chr1	-	36174078	36174210	36174078	36174130	36174895	36175102	1516	17421296644	301618	62325301252	2405	230	150	0.010624	0.144242	0.974,0.981,0.959	0.995,0.976,0.994	-0.017	chr1:36174210-36174896(-)	chr1:36174130-36174896(-)
ENSMUSG00000032740	Ccdc88a	chr11	+	29470314	29470456	29470317	29470456	29465610	29465738	1518	19113959	240	55274126	240	153	150	0.855802	1	0.989,0.971,1.0	0.964,0.985,1.0	0.004	chr11:29465738-29470315(+)	chr11:29465738-29470318(+)
ENSMUSG00000033852	Gm28042	chr2	+	120031501	120031651	120031574	120031651	120031306	120031402	1520	373410	292921	4167	128155	223	150	1.34029e-07	5.59143e-05	0.462,0.441,0.243	0.183,0.117,0.079	0.256	chr2:120031402-120031502(+)	chr2:120031402-120031575(+)
ENSMUSG00000033852	Gm28042	chr2	+	120034477	120034670	120034573	120034670	120032113	120032465	1521	11158	62	181	1	246	150	1	1	1.0,0.604,0.709	NA,1.0,0.379	0.082	chr2:120032465-120034478(+)	chr2:120032465-120034574(+)
ENSMUSG00000084786	Ubl5	chr9	+	20645601	20645659	20645621	20645659	20645405	20645489	1523	37339	322223601243	104524	118750203067	170	150	0.892763	1	0.01,0.012,0.006	0.007,0.008,0.007	0.002	chr9:20645489-20645602(+)	chr9:20645489-20645622(+)
ENSMUSG00000011658	Fuz	chr7	+	44898502	44898700	44898515	44898700	44897519	44897624	1524	1348626	1	57187110	2	163	150	1	1	1.0,1.0,0.96	1.0,1.0,0.981	-0.007	chr7:44897624-44898503(+)	chr7:44897624-44898516(+)
ENSMUSG00000025010	Ccnj	chr19	+	40845044	40845204	40845080	40845204	40844659	40844959	1526	1198529	712	4712679	1101	186	150	0.65014	1	0.932,0.986,0.921	0.974,0.91,0.985	-0.01	chr19:40844959-40845045(+)	chr19:40844959-40845081(+)
ENSMUSG00000026648	Dclre1c	chr2	+	3436988	3437090	3437001	3437090	3436437	3436493	1529	492821	0	208736	6	163	150	0.191455	0.75675	1.0,1.0,1.0	1.0,1.0,0.847	0.051	chr2:3436493-3436989(+)	chr2:3436493-3437002(+)
ENSMUSG00000026648	Dclre1c	chr2	+	3436988	3437090	3437029	3437090	3436437	3436493	1530	735836	355	3611748	171	191	150	0.182024	0.73819	0.95,0.901,0.85	0.966,0.929,0.974	-0.056	chr2:3436493-3436989(+)	chr2:3436493-3437030(+)
ENSMUSG00000026648	Dclre1c	chr2	+	3437001	3437090	3437029	3437090	3436437	3436493	1531	243015	355	163020	171	178	150	0.378299	1	0.871,0.835,0.717	0.931,0.783,0.944	-0.078	chr2:3436493-3437002(+)	chr2:3436493-3437030(+)
ENSMUSG00000034278	Dnajc17	chr2	-	119180486	119180680	119180486	119180564	119180925	119180969	1532	35308	19810258	73015	51224131	266	150	0.0260388	0.24436	0.091,0.142,0.072	0.072,0.07,0.061	0.034	chr2:119180680-119180926(-)	chr2:119180564-119180926(-)
ENSMUSG00000090210	Itga10	chr3	+	96656440	96656533	96656443	96656533	96656151	96656293	1534	483	1	104	0	153	150	1	1	1.0,1.0,0.746	NA,1.0,1.0	-0.085	chr3:96656293-96656441(+)	chr3:96656293-96656444(+)
ENSMUSG00000005699	Pard6a	chr8	+	105702607	105703493	105702610	105703493	105702173	105702396	1536	361410	37224	94337	103029	153	150	0.555715	1	0.488,0.384,0.71	0.469,0.584,0.556	-0.009	chr8:105702396-105702608(+)	chr8:105702396-105702611(+)
ENSMUSG00000038520	Tbc1d17	chr7	-	44845256	44845368	44845256	44845328	44845874	44846082	1539	22016552	233	92331189	41	190	150	0.557748	1	0.989,0.977,0.932	1.0,0.985,0.993	-0.027	chr7:44845368-44845875(-)	chr7:44845328-44845875(-)
ENSMUSG00000039130	Zc3hc1	chr6	-	30375938	30376066	30375938	30376062	30381780	30381864	1543	230143102	0	69322197	34	154	150	1	1	1.0,1.0,1.0	1.0,0.991,0.98	0.01	chr6:30376066-30381781(-)	chr6:30376062-30381781(-)
ENSMUSG00000039623	Ap5z1	chr5	+	142466475	142466676	142466489	142466676	142466257	142466392	1544	1456	1499150	269	3818059	164	150	0.296375	0.929043	0.079,0.048,0.099	0.046,0.03,0.122	0.009	chr5:142466392-142466476(+)	chr5:142466392-142466490(+)
ENSMUSG00000039623	Ap5z1	chr5	+	142470382	142470556	142470393	142470556	142470289	142470327	1545	2	656239	252	1913356	161	150	0.0443954	0.336937	0.0,0.0,0.046	0.089,0.034,0.032	-0.036	chr5:142470327-142470383(+)	chr5:142470327-142470394(+)
ENSMUSG00000039623	Ap5z1	chr5	+	142474373	142474514	142474421	142474514	142473907	142474050	1546	1028744	600	4115775	20	198	150	0.421376	1	0.928,1.0,1.0	1.0,0.983,1.0	-0.018	chr5:142474050-142474374(+)	chr5:142474050-142474422(+)
ENSMUSG00000004040	Stat3	chr11	-	100889477	100889590	100889477	100889540	100889885	100889928	1548	938705334	1047551	3061410746	2720495	200	150	0.545978	1	0.871,0.876,0.831	0.895,0.838,0.855	-0.003	chr11:100889590-100889886(-)	chr11:100889540-100889886(-)
ENSMUSG00000021288	Klc1	chr12	+	111789324	111789486	111789348	111789486	111787487	111787596	1551	438281151	15910259	100433271	57245119	174	150	0.00583121	0.100291	0.704,0.704,0.688	0.602,0.604,0.663	0.076	chr12:111787596-111789325(+)	chr12:111787596-111789349(+)
ENSMUSG00000054405	Dnajc8	chr4	+	132541720	132541838	132541781	132541838	132538186	132538288	1555	414910	889581292	213916	2921308745	211	150	0.00276346	0.0603881	0.032,0.057,0.024	0.049,0.021,0.015	0.009	chr4:132538288-132541721(+)	chr4:132538288-132541782(+)
ENSMUSG00000054405	Dnajc8	chr4	+	132544009	132544122	132544055	132544122	132541781	132541838	1556	524125	1189830442	226739	39418091015	196	150	0.272422	0.891686	0.032,0.036,0.041	0.041,0.028,0.029	0.004	chr4:132541838-132544010(+)	chr4:132541838-132544056(+)
ENSMUSG00000039536	Stau1	chr2	-	166953207	166953351	166953207	166953345	166954899	166955112	1558	567437179	240	148719472	103	156	150	1	1	0.996,0.991,1.0	0.993,1.0,0.993	0	chr2:166953351-166954900(-)	chr2:166953345-166954900(-)
ENSMUSG00000039536	Stau1	chr2	-	166954899	166955130	166954899	166955112	166960022	166960121	1559	311224116	319266119	107371235	109399283	168	150	0.840874	1	0.465,0.429,0.465	0.467,0.454,0.426	0.004	chr2:166955130-166960023(-)	chr2:166955112-166960023(-)
ENSMUSG00000038085	Cnbd2	chr2	+	156335249	156335413	156335285	156335413	156333578	156333632	1560	45289	0	113921	200	186	150	1	1	1.0,1.0,1.0	0.816,1.0,1.0	0.061	chr2:156333632-156335250(+)	chr2:156333632-156335286(+)
ENSMUSG00000028245	Nsmaf	chr4	-	6437741	6437778	6437741	6437745	6437853	6437921	1561	742578204	10	2061000486	0	183	150	1	1	1.0,0.998,1.0	1.0,1.0,1.0	-0.001	chr4:6437778-6437854(-)	chr4:6437745-6437854(-)
ENSMUSG00000021733	Slc4a7	chr14	+	14757284	14757431	14757378	14757431	14750434	14750522	1562	21217091	7102	86371148	230	244	150	0.00014372	0.00804308	0.949,0.913,0.965	0.964,0.987,1.0	-0.041	chr14:14750522-14757285(+)	chr14:14750522-14757379(+)
ENSMUSG00000021733	Slc4a7	chr14	+	14791051	14791164	14791066	14791164	14786291	14786423	1563	745	1308725	7139	4117698	165	150	0.257856	0.873336	0.047,0.04,0.154	0.134,0.063,0.077	-0.011	chr14:14786423-14791052(+)	chr14:14786423-14791067(+)
ENSMUSG00000039176	Polg	chr7	-	79456040	79456188	79456040	79456148	79456434	79456512	1564	403422	554428245	165623	242805466	190	150	0.183124	0.73819	0.054,0.059,0.066	0.05,0.052,0.038	0.013	chr7:79456188-79456435(-)	chr7:79456148-79456435(-)
ENSMUSG00000020952	Scfd1	chr12	+	51387049	51387138	51387066	51387138	51384104	51384175	1569	675490201	200	201971533	51	167	150	1	1	0.997,1.0,1.0	1.0,0.994,0.998	0.002	chr12:51384175-51387050(+)	chr12:51384175-51387067(+)
ENSMUSG00000020952	Scfd1	chr12	+	51444794	51445017	51444983	51445017	51442530	51442583	1570	254919	435241143	77817	127622248	300	150	0.326185	0.971989	0.028,0.092,0.062	0.027,0.059,0.033	0.021	chr12:51442583-51444795(+)	chr12:51442583-51444984(+)
ENSMUSG00000034343	Ube2f	chr1	+	91254214	91254393	91254259	91254393	91253759	91253827	1572	717425	22195	209351	94011	195	150	0.296792	0.929043	0.713,0.75,0.794	0.631,0.641,0.781	0.068	chr1:91253827-91254215(+)	chr1:91253827-91254260(+)
ENSMUSG00000019856	Fam184a	chr10	-	53635231	53635897	53635231	53635434	53638176	53638281	1575	522	20	230	11	300	150	0.572542	1	1.0,0.333,1.0	1.0,0.6,0.0	0.244	chr10:53635897-53638177(-)	chr10:53635434-53638177(-)
ENSMUSG00000018008	Cyth4	chr15	+	78604859	78605913	78605846	78605913	78604635	78604700	1576	926949	553345205	3514452	156695368	300	150	0.81228	1	0.077,0.091,0.107	0.101,0.094,0.066	0.005	chr15:78604700-78604860(+)	chr15:78604700-78605847(+)
ENSMUSG00000018008	Cyth4	chr15	+	78611421	78611597	78611448	78611597	78609761	78609874	1577	504423	530340172	158945	126732364	177	150	0.656178	1	0.074,0.099,0.102	0.092,0.093,0.095	-0.002	chr15:78609874-78611422(+)	chr15:78609874-78611449(+)
ENSMUSG00000025591	Tma16	chr8	-	66482505	66482599	66482505	66482543	66484057	66484170	1578	585215	24816490	2411741	106440240	206	150	0.603691	1	0.146,0.188,0.108	0.142,0.162,0.111	0.009	chr8:66482599-66484058(-)	chr8:66482543-66484058(-)
ENSMUSG00000041740	Rnf10	chr5	-	115241769	115242061	115241769	115242058	115242392	115242551	1579	1448944461	14311953	43719411081	45217125	153	150	0.983859	1	0.908,0.886,0.895	0.905,0.898,0.894	-0.003	chr5:115242061-115242393(-)	chr5:115242058-115242393(-)
ENSMUSG00000041740	Rnf10	chr5	-	115248914	115249173	115248914	115249170	115249396	115249522	1580	1208237	814530343	3514378	3081131734	153	150	0.162973	0.700922	0.126,0.132,0.096	0.1,0.11,0.094	0.017	chr5:115249173-115249397(-)	chr5:115249170-115249397(-)
ENSMUSG00000018474	Chd3	chr11	-	69355630	69355820	69355630	69355772	69356206	69356380	1589	510	352347113	100	77371228	198	150	1	1	0.011,0.002,0.0	0.01,0.0,0.0	0.001	chr11:69355820-69356207(-)	chr11:69355772-69356207(-)
ENSMUSG00000018474	Chd3	chr11	-	69361048	69361242	69361048	69361224	69361384	69361535	1590	8211333	30428369	209159	73324190	168	150	0.186255	0.742599	0.194,0.263,0.299	0.197,0.2,0.217	0.047	chr11:69361242-69361385(-)	chr11:69361224-69361385(-)
ENSMUSG00000018474	Chd3	chr11	-	69361384	69361535	69361384	69361523	69361670	69361721	1591	377310116	20151	87380237	4142	162	150	0.0915449	0.513877	0.946,0.95,0.991	0.953,0.962,0.991	-0.006	chr11:69361535-69361671(-)	chr11:69361523-69361671(-)
ENSMUSG00000060206	Zfp462	chr4	+	55016813	55017100	55016996	55017100	55014682	55014847	1593	11	2116	2	33	300	150	1	1	0.0,0.043,0.077	NA,0.0,0.25	-0.085	chr4:55014847-55016814(+)	chr4:55014847-55016997(+)
ENSMUSG00000060206	Zfp462	chr4	+	55016816	55017100	55016996	55017100	55014682	55014847	1594	1	2116	2	33	300	150	1	1	0.0,0.0,0.077	NA,0.0,0.25	-0.099	chr4:55014847-55016817(+)	chr4:55014847-55016997(+)
ENSMUSG00000038738	Shank1	chr7	+	44342419	44342544	44342424	44342544	44342097	44342180	1598	22	0	1	2	155	150	1	1	NA,1.0,1.0	NA,NA,0.326	0.674	chr7:44342180-44342420(+)	chr7:44342180-44342425(+)
ENSMUSG00000002102	Psmc3	chr2	+	91056641	91056801	91056657	91056801	91055904	91056042	1602	563925	22141565800	2412447	82333141972	166	150	0.259226	0.874056	0.022,0.022,0.027	0.026,0.033,0.021	-0.003	chr2:91056042-91056642(+)	chr2:91056042-91056658(+)
ENSMUSG00000020692	Nle1	chr11	-	82902994	82903197	82902994	82903133	82904089	82904136	1603	363288122	24308	103485282	119530	214	150	0.000952171	0.0297246	0.914,0.871,0.914	0.868,0.782,0.868	0.06	chr11:82903197-82904090(-)	chr11:82903133-82904090(-)
ENSMUSG00000001855	Nup214	chr2	+	32039319	32039476	32039322	32039476	32038101	32038172	1605	360319140	875731	154503278	3612664	153	150	0.386764	1	0.802,0.846,0.816	0.807,0.796,0.81	0.017	chr2:32038172-32039320(+)	chr2:32038172-32039323(+)
ENSMUSG00000024845	Tmem134	chr19	+	4127549	4127639	4127576	4127639	4127056	4127121	1607	354180133	230	106485279	242	177	150	1	1	0.993,0.981,1.0	0.978,0.99,0.992	0.005	chr19:4127121-4127550(+)	chr19:4127121-4127577(+)
ENSMUSG00000024845	Tmem134	chr19	+	4130856	4131075	4131030	4131075	4127759	4127836	1609	221213	1346553	122417	41221141	300	150	0.178169	0.731976	0.076,0.085,0.109	0.128,0.052,0.057	0.011	chr19:4127836-4130857(+)	chr19:4127836-4131031(+)
ENSMUSG00000024845	Tmem134	chr19	+	4131361	4131727	4131396	4131727	4131228	4131282	1610	771446289	0	2511169639	3	185	150	1	1	1.0,1.0,1.0	1.0,1.0,0.994	0.002	chr19:4131282-4131362(+)	chr19:4131282-4131397(+)
ENSMUSG00000028582	Cc2d1b	chr4	+	108625333	108625533	108625407	108625533	108624845	108625004	1613	20158	25617893	12328	72293161	224	150	0.404003	1	0.05,0.053,0.054	0.1,0.068,0.032	-0.014	chr4:108625004-108625334(+)	chr4:108625004-108625408(+)
ENSMUSG00000028582	Cc2d1b	chr4	+	108625980	108626153	108626037	108626153	108625654	108625814	1615	622503216	12910	181879539	23527	207	150	0.0174316	0.192293	0.974,0.976,0.94	0.985,0.948,0.935	0.007	chr4:108625814-108625981(+)	chr4:108625814-108626038(+)
ENSMUSG00000026925	Inpp5e	chr2	-	26401600	26401785	26401600	26401698	26402099	26402223	1618	14121	16611570	91914	78222117	237	150	0.248987	0.864299	0.051,0.062,0.009	0.068,0.051,0.07	-0.022	chr2:26401785-26402100(-)	chr2:26401698-26402100(-)
ENSMUSG00000068205	Macrod2	chr2	+	140419904	140420495	140419950	140420495	140418816	140418914	1621	503435	0	128862	2	196	150	1	1	1.0,1.0,1.0	1.0,1.0,0.96	0.013	chr2:140418914-140419905(+)	chr2:140418914-140419951(+)
ENSMUSG00000028382	Ptbp3	chr4	-	59485606	59485746	59485606	59485731	59488110	59488188	1624	274719041072	31922	98640262401	83015	165	150	0.355427	1	0.988,0.995,0.978	0.991,0.992,0.993	-0.005	chr4:59485746-59488111(-)	chr4:59485731-59488111(-)
ENSMUSG00000022255	Mtdh	chr15	+	34114023	34118110	34117879	34118110	34099483	34099585	1625	15881205590	8243	49922381296	112123	300	150	0.171748	0.719035	0.99,0.962,0.99	0.958,0.982,0.966	0.012	chr15:34099585-34114024(+)	chr15:34099585-34117880(+)
ENSMUSG00000022255	Mtdh	chr15	+	34136673	34136827	34136686	34136827	34134290	34134398	1626	33346	427277139	125022	134587306	163	150	0.78981	1	0.066,0.101,0.038	0.076,0.073,0.062	-0.002	chr15:34134398-34136674(+)	chr15:34134398-34136687(+)
ENSMUSG00000027667	Zfp639	chr3	+	32515283	32517139	32517028	32517139	32514383	32514454	1632	18112755	11100	58268120	2166	300	150	0.809686	1	0.892,0.864,1.0	0.935,0.893,0.909	0.006	chr3:32514454-32515284(+)	chr3:32514454-32517029(+)
ENSMUSG00000001844	Zdhhc4	chr5	-	143324131	143324398	143324131	143324310	143324884	143324958	1633	1239951	16613861	37174102	65252156	238	150	0.320644	0.962829	0.318,0.311,0.345	0.264,0.303,0.292	0.038	chr5:143324398-143324885(-)	chr5:143324310-143324885(-)
ENSMUSG00000001844	Zdhhc4	chr5	-	143326098	143326305	143326098	143326223	143328390	143328570	1635	603911	41024195	136438	141547305	232	150	0.157308	0.686856	0.086,0.095,0.07	0.056,0.07,0.075	0.017	chr5:143326305-143328391(-)	chr5:143326223-143328391(-)
ENSMUSG00000036502	Tmem255a	chrX	-	38224580	38225125	38224580	38224669	38233102	38233192	1639	0	10	20	0	300	150	1	1	NA,0.0,NA	NA,1.0,NA	-1	chrX:38225125-38233103(-)	chrX:38224669-38233103(-)
ENSMUSG00000039477	Tnrc18	chr5	-	142773618	142774048	142773618	142774045	142775208	142775399	1640	388300182	342923	94410243	105135	153	150	0.159936	0.693056	0.918,0.91,0.886	0.902,0.887,0.872	0.018	chr5:142774048-142775209(-)	chr5:142774045-142775209(-)
ENSMUSG00000032295	Man2c1	chr9	+	57139610	57139708	57139687	57139708	57139245	57139401	1642	228172102	0	110352230	55	227	150	0.362491	1	1.0,1.0,1.0	1.0,0.979,0.968	0.018	chr9:57139401-57139611(+)	chr9:57139401-57139688(+)
ENSMUSG00000001416	Cct3	chr3	+	88313090	88313374	88313241	88313374	88311672	88311822	1647	18327	293320661035	54720	99940412669	300	150	1	1	0.003,0.008,0.003	0.002,0.006,0.004	0.001	chr3:88311822-88313091(+)	chr3:88311822-88313242(+)
ENSMUSG00000026853	Crat	chr2	-	30403488	30403641	30403488	30403626	30404527	30404590	1649	642	1208245	5911	4116487	165	150	0.0683447	0.430225	0.043,0.042,0.039	0.1,0.048,0.103	-0.042	chr2:30403641-30404528(-)	chr2:30403626-30404528(-)
ENSMUSG00000003235	Eif2b5	chr16	+	20508937	20509323	20508960	20509323	20508708	20508819	1651	310	526389184	162	187753458	173	150	1	1	0.005,0.002,0.0	0.005,0.007,0.004	-0.003	chr16:20508819-20508938(+)	chr16:20508819-20508961(+)
ENSMUSG00000032187	Smarca4	chr9	+	21686012	21686275	21686021	21686275	21678928	21679147	1652	570382195	791567291	176695371	236979533	159	150	0.739804	1	0.405,0.389,0.387	0.413,0.401,0.396	-0.01	chr9:21679147-21686013(+)	chr9:21679147-21686022(+)
ENSMUSG00000032187	Smarca4	chr9	+	21699799	21699908	21699802	21699908	21686021	21686275	1654	700545229	19917752	219828496	71315196	153	150	0.0184184	0.197021	0.775,0.751,0.812	0.751,0.72,0.713	0.051	chr9:21686275-21699800(+)	chr9:21686275-21699803(+)
ENSMUSG00000047757	Fancb	chrX	+	164992703	164992894	164992730	164992894	164991544	164991688	1658	520	636524	347	3813069	177	150	0.318884	0.961472	0.063,0.025,0.0	0.063,0.025,0.079	-0.026	chrX:164991688-164992704(+)	chrX:164991688-164992731(+)
ENSMUSG00000002319	Ipo4	chr14	-	55628591	55628684	55628591	55628639	55628793	55628987	1666	18185	17514455	6125	51260171	195	150	0.00244027	0.0557135	0.073,0.088,0.065	0.083,0.034,0.022	0.029	chr14:55628684-55628794(-)	chr14:55628639-55628794(-)
ENSMUSG00000085396	Firre	chrX	-	50627206	50627309	50627206	50627250	50630890	50630995	1669	999027	515710	1716496	225320	209	150	0.547729	1	0.582,0.531,0.66	0.357,0.69,0.775	-0.016	chrX:50627309-50630891(-)	chrX:50627250-50630891(-)
ENSMUSG00000005982	Naa60	chr16	+	3900642	3900877	3900692	3900877	3899871	3899968	1670	1245715497	765228	46619451143	3010047	200	150	0.101533	0.541331	0.925,0.912,0.93	0.921,0.936,0.948	-0.013	chr16:3899968-3900643(+)	chr16:3899968-3900693(+)
ENSMUSG00000032000	Birc3	chr9	-	7850919	7851171	7850919	7851086	7854366	7854606	1674	421352142	453	170655411	55	235	150	0.308199	0.950384	0.985,0.978,0.968	1.0,0.988,0.981	-0.013	chr9:7851171-7854367(-)	chr9:7851086-7854367(-)
ENSMUSG00000030541	Idh2	chr7	-	80098135	80098381	80098135	80098272	80098770	80098914	1675	14912970	307222461079	42216128	112246572620	259	150	0.08283	0.480156	0.027,0.032,0.036	0.021,0.026,0.028	0.007	chr7:80098381-80098771(-)	chr7:80098272-80098771(-)
ENSMUSG00000020464	Pnpt1	chr11	+	29133851	29133926	29133855	29133926	29132844	29132905	1676	315210117	1277	78448237	2174	154	150	0.318313	0.961109	0.962,0.967,0.942	0.974,0.963,0.983	-0.016	chr11:29132905-29133852(+)	chr11:29132905-29133856(+)
ENSMUSG00000036112	Metap2	chr10	-	93879539	93879636	93879539	93879573	93880072	93880138	1679	1251936408	503315	47417091058	173630	213	150	0.0359297	0.298158	0.946,0.952,0.95	0.952,0.971,0.961	-0.012	chr10:93879636-93880073(-)	chr10:93879573-93880073(-)
ENSMUSG00000036112	Metap2	chr10	-	93879539	93879642	93879539	93879573	93880072	93880138	1680	389526251342	503315	138653773273	173630	219	150	0.0287832	0.260522	0.982,0.982,0.984	0.982,0.99,0.987	-0.004	chr10:93879642-93880073(-)	chr10:93879573-93880073(-)
ENSMUSG00000036112	Metap2	chr10	-	93879539	93879672	93879539	93879573	93880072	93880138	1681	14571063463	503315	52619531201	173630	249	150	0.042606	0.330451	0.946,0.951,0.949	0.949,0.97,0.96	-0.011	chr10:93879672-93880073(-)	chr10:93879573-93880073(-)
ENSMUSG00000036112	Metap2	chr10	-	93879539	93879642	93879539	93879636	93880072	93880138	1682	26471689936	302	91236682215	0	156	150	1	1	0.999,1.0,0.998	1.0,1.0,1.0	-0.001	chr10:93879642-93880073(-)	chr10:93879636-93880073(-)
ENSMUSG00000036112	Metap2	chr10	-	93879539	93879672	93879539	93879636	93880072	93880138	1683	21312757	302	56244143	0	186	150	0.961501	1	0.983,1.0,0.958	1.0,1.0,1.0	-0.02	chr10:93879672-93880073(-)	chr10:93879636-93880073(-)
ENSMUSG00000036112	Metap2	chr10	-	93879539	93879672	93879539	93879642	93880072	93880138	1684	414213	24751604892	116228	86734862100	180	150	0.198474	0.770449	0.014,0.021,0.012	0.01,0.015,0.011	0.004	chr10:93879672-93880073(-)	chr10:93879642-93880073(-)
ENSMUSG00000036112	Metap2	chr10	-	93886993	93887101	93886993	93887098	93889537	93889814	1685	1065790342	1319034	3931467950	49213117	153	150	0.222251	0.817398	0.889,0.896,0.908	0.887,0.871,0.888	0.016	chr10:93887101-93889538(-)	chr10:93887098-93889538(-)
ENSMUSG00000057335	Cep170	chr1	-	176782496	176782555	176782496	176782551	176788466	176788545	1686	20619590	2	84286164	24	154	150	1	1	1.0,1.0,0.978	1.0,0.993,0.976	0.003	chr1:176782555-176788467(-)	chr1:176782551-176788467(-)
ENSMUSG00000040383	Aqr	chr2	-	114158869	114159159	114158869	114159010	114161563	114161684	1687	29138	592414210	62622	200676380	299	150	0.818318	1	0.024,0.016,0.019	0.015,0.019,0.028	-0.001	chr2:114159159-114161564(-)	chr2:114159010-114161564(-)
ENSMUSG00000000131	Xpo6	chr7	-	126104703	126104934	126104703	126104789	126105100	126105199	1692	1009762367	1042	2731477766	58	295	150	0.645517	1	0.981,0.99,0.989	1.0,0.993,0.98	-0.004	chr7:126104934-126105101(-)	chr7:126104789-126105101(-)
ENSMUSG00000000131	Xpo6	chr7	-	126108785	126108900	126108785	126108855	126109913	126110069	1693	769674318	510	2641048631	63	195	150	1	1	0.992,0.998,1.0	1.0,0.993,0.994	0.001	chr7:126108900-126109914(-)	chr7:126108855-126109914(-)
ENSMUSG00000000131	Xpo6	chr7	-	126129547	126129640	126129547	126129637	126131025	126131134	1694	559407214	514114	165795439	146634	153	150	0.603657	1	0.915,0.907,0.937	0.92,0.922,0.927	-0.003	chr7:126129640-126131026(-)	chr7:126129637-126131026(-)
ENSMUSG00000034801	Sos2	chr12	-	69618055	69618183	69618055	69618180	69627216	69627315	1695	30726596	281011	99375239	142913	153	150	0.715749	1	0.915,0.963,0.895	0.874,0.927,0.947	0.008	chr12:69618183-69627217(-)	chr12:69618180-69627217(-)
ENSMUSG00000041975	Mettl8	chr2	-	70981854	70982195	70981854	70981967	70993483	70993575	1696	394353116	8218	121441234	234814	300	150	0.000131655	0.00755205	0.961,0.894,0.879	0.725,0.821,0.893	0.098	chr2:70982195-70993484(-)	chr2:70981967-70993484(-)
ENSMUSG00000031295	Phka2	chrX	+	160590165	160590368	160590167	160590368	160588964	160589018	1698	1123	634508254	9159	265900516	152	150	0.0562701	0.386753	0.017,0.004,0.012	0.032,0.016,0.017	-0.011	chrX:160589018-160590166(+)	chrX:160589018-160590168(+)
ENSMUSG00000030577	Cd22	chr7	-	30872735	30872999	30872735	30872875	30873134	30873419	1700	43149	0	72523	20	274	150	1	1	1.0,1.0,1.0	1.0,0.872,1.0	0.043	chr7:30872999-30873135(-)	chr7:30872875-30873135(-)
ENSMUSG00000030577	Cd22	chr7	-	30877438	30877843	30877438	30877688	30878049	30878107	1701	411411	11	173112	20	300	150	1	1	1.0,0.875,0.846	1.0,0.886,1.0	-0.055	chr7:30877843-30878050(-)	chr7:30877688-30878050(-)
ENSMUSG00000030577	Cd22	chr7	-	30877438	30877917	30877438	30877688	30878049	30878107	1702	2677	11	11158	20	300	150	1	1	1.0,0.778,0.778	1.0,0.789,1.0	-0.078	chr7:30877917-30878050(-)	chr7:30877688-30878050(-)
ENSMUSG00000030577	Cd22	chr7	-	30877438	30877917	30877438	30877843	30878049	30878107	1703	0	1574	20	6164	224	150	1	1	0.0,0.0,0.0	0.0,0.077,0.0	-0.026	chr7:30877917-30878050(-)	chr7:30877843-30878050(-)
ENSMUSG00000030577	Cd22	chr7	-	30879928	30880031	30879928	30880017	30880235	30880278	1704	602	2	52	34	164	150	1	1	1.0,NA,0.478	NA,0.604,0.314	0.28	chr7:30880031-30880236(-)	chr7:30880017-30880236(-)
ENSMUSG00000027088	Phospho2	chr2	+	69792336	69792491	69792372	69792491	69790285	69790321	1705	15513049	1376	52179146	81716	186	150	0.183904	0.73819	0.906,0.937,0.868	0.84,0.895,0.88	0.032	chr2:69790321-69792337(+)	chr2:69790321-69792373(+)
ENSMUSG00000030846	Tial1	chr7	-	128446730	128447107	128446730	128446798	128448120	128448208	1708	867932	643918	5923177	229056	300	150	0.266211	0.884605	0.402,0.503,0.471	0.573,0.562,0.407	-0.055	chr7:128447107-128448121(-)	chr7:128446798-128448121(-)
ENSMUSG00000030846	Tial1	chr7	-	128448620	128448770	128448620	128448719	128454935	128455032	1709	14313271	830604279	63169137	2841161666	201	150	0.270676	0.890232	0.114,0.14,0.16	0.142,0.098,0.133	0.014	chr7:128448770-128454936(-)	chr7:128448719-128454936(-)
ENSMUSG00000054641	Mmrn1	chr6	+	60987073	60987226	60987076	60987226	60975817	60977794	1713	22276	2152	124137	7107	153	150	0.906168	1	0.915,0.638,0.746	0.627,0.801,0.838	0.011	chr6:60977794-60987074(+)	chr6:60977794-60987077(+)
ENSMUSG00000002227	Mov10	chr3	-	104817935	104818156	104817935	104818121	104818356	104818563	1715	12115	210	12510	20	185	150	0.510874	1	0.829,0.899,1.0	1.0,0.91,1.0	-0.061	chr3:104818156-104818357(-)	chr3:104818121-104818357(-)
ENSMUSG00000072825	Cep170b	chr12	+	112740773	112741011	112740878	112741011	112737838	112739509	1717	49237	400	103716	20	255	150	0.501786	1	0.878,1.0,1.0	1.0,0.916,1.0	-0.013	chr12:112739509-112740774(+)	chr12:112739509-112740879(+)
ENSMUSG00000023930	Crisp2	chr17	-	40786138	40786269	40786138	40786255	40790586	40790664	1718	0	360	10	5	164	150	1	1	0.0,0.0,NA	NA,1.0,0.0	-0.5	chr17:40786269-40790587(-)	chr17:40786255-40790587(-)
ENSMUSG00000061689	Dlgap4	chr2	+	156748022	156748420	156748331	156748420	156745834	156746196	1720	393912	15911846	216439	43239139	300	150	0.639768	1	0.109,0.142,0.115	0.196,0.118,0.123	-0.024	chr2:156746196-156748023(+)	chr2:156746196-156748332(+)
ENSMUSG00000001228	Uhrf1	chr17	+	56313040	56313251	56313064	56313251	56312863	56312967	1721	270219821044	286185116	87236622036	89412204	174	150	0.797553	1	0.891,0.902,0.886	0.894,0.885,0.896	0.001	chr17:56312967-56313041(+)	chr17:56312967-56313065(+)
ENSMUSG00000026977	March7	chr2	+	60233898	60234997	60233933	60234997	60232199	60232367	1723	641438206	866929	187970515	134339	185	150	4.94569e-09	3.24226e-06	0.858,0.837,0.852	0.921,0.948,0.915	-0.079	chr2:60232367-60233899(+)	chr2:60232367-60233934(+)
ENSMUSG00000037503	Fam168b	chr1	-	34819591	34819790	34819591	34819769	34819866	34820009	1724	17212577	881625329	56233139	3231212712	171	150	0.458001	1	0.146,0.149,0.17	0.132,0.144,0.146	0.014	chr1:34819790-34819867(-)	chr1:34819769-34819867(-)
ENSMUSG00000037503	Fam168b	chr1	-	34819866	34819963	34819866	34819920	34828766	34828847	1726	356207137	200	113438271	304	193	150	0.897066	1	0.993,1.0,1.0	0.967,1.0,0.981	0.015	chr1:34819963-34828767(-)	chr1:34819920-34828767(-)
ENSMUSG00000037503	Fam168b	chr1	-	34819866	34820009	34819866	34819920	34828766	34828847	1727	16141074539	200	47520181279	304	239	150	1	1	0.998,1.0,1.0	0.99,1.0,0.995	0.004	chr1:34820009-34828767(-)	chr1:34819920-34828767(-)
ENSMUSG00000037503	Fam168b	chr1	-	34819866	34820009	34819866	34819963	34828766	34828847	1728	1307885415	15213	38016271042	21716	196	150	0.90953	1	0.985,0.997,0.961	0.993,0.987,0.98	-0.006	chr1:34820009-34828767(-)	chr1:34819963-34828767(-)
ENSMUSG00000026826	Nr4a2	chr2	-	57108560	57108739	57108560	57108618	57109062	57109265	1729	424113	121	145635	254	271	150	0.030676	0.272635	0.959,0.919,0.878	0.795,0.861,0.829	0.09	chr2:57108739-57109063(-)	chr2:57108618-57109063(-)
ENSMUSG00000026826	Nr4a2	chr2	-	57111575	57112441	57111575	57112263	57112950	57113072	1730	888826	62	169346	20	300	150	0.0159242	0.182691	1.0,0.88,0.867	1.0,0.959,1.0	-0.071	chr2:57112441-57112951(-)	chr2:57112263-57112951(-)
ENSMUSG00000026826	Nr4a2	chr2	-	57112950	57113289	57112950	57113072	57114717	57115038	1731	26328	20	191516	3	300	150	0.783372	1	1.0,0.889,1.0	1.0,1.0,0.727	0.054	chr2:57113289-57114718(-)	chr2:57113072-57114718(-)
ENSMUSG00000041406	BC055324	chr1	-	163955336	163955456	163955336	163955452	163956827	163956908	1733	283179110	200	75351175	30	154	150	1	1	0.993,1.0,1.0	1.0,0.991,1.0	0.001	chr1:163955456-163956828(-)	chr1:163955452-163956828(-)
ENSMUSG00000019790	Stxbp5	chr10	-	9769340	9769710	9769340	9769534	9770449	9770689	1736	17791192719	102614	57223131449	43815	300	150	0.775221	1	0.989,0.958,0.963	0.986,0.968,0.98	-0.008	chr10:9769710-9770450(-)	chr10:9769534-9770450(-)
ENSMUSG00000019790	Stxbp5	chr10	-	9778020	9778071	9778020	9778066	9789362	9789428	1738	541375191	610	166737419	32	155	150	1	1	0.989,0.997,1.0	1.0,0.996,0.995	-0.002	chr10:9778071-9789363(-)	chr10:9778066-9789363(-)
ENSMUSG00000032178	Ilf3	chr9	+	21388508	21388753	21388523	21388753	21387699	21387797	1739	525115	387338128	277343	145438307	165	150	0.317423	0.960279	0.109,0.121,0.096	0.145,0.132,0.113	-0.021	chr9:21387797-21388509(+)	chr9:21387797-21388524(+)
ENSMUSG00000032178	Ilf3	chr9	+	21399112	21399250	21399124	21399250	21397968	21398136	1742	33237	952677300	92323	3611271694	162	150	0.14822	0.662561	0.031,0.03,0.021	0.023,0.016,0.03	0.004	chr9:21398136-21399113(+)	chr9:21398136-21399125(+)
ENSMUSG00000027763	Mbnl1	chr3	+	60615619	60615773	60615724	60615773	60613262	60613520	1743	355828251420	18411684	141557893272	5021196	255	150	0.00068545	0.0231289	0.919,0.935,0.909	0.943,0.942,0.952	-0.025	chr3:60613520-60615620(+)	chr3:60613520-60615725(+)
ENSMUSG00000026761	Orc4	chr2	-	48910185	48910294	48910185	48910242	48912561	48912648	1745	312231133	23199	133470298	124625	202	150	0.299604	0.937207	0.91,0.9,0.916	0.892,0.884,0.898	0.017	chr2:48910294-48912562(-)	chr2:48910242-48912562(-)
ENSMUSG00000038866	Zcchc2	chr1	+	106027387	106027531	106027402	106027531	106023663	106023758	1746	414316	12513058	147235	5119688	165	150	0.492363	1	0.23,0.231,0.201	0.2,0.25,0.266	-0.018	chr1:106023758-106027388(+)	chr1:106023758-106027403(+)
ENSMUSG00000036928	Stag3	chr5	+	138299319	138299428	138299338	138299428	138299130	138299223	1748	400	46267	20	133637	169	150	0.696504	1	0.072,0.0,0.0	0.0,0.047,0.0	0.008	chr5:138299223-138299320(+)	chr5:138299223-138299339(+)
ENSMUSG00000027361	Gabpb1	chr2	-	126646562	126646748	126646562	126646745	126650067	126650181	1750	261236113	383620	114431235	134527	153	150	0.0555007	0.38365	0.871,0.865,0.847	0.896,0.904,0.895	-0.037	chr2:126646748-126650068(-)	chr2:126646745-126650068(-)
ENSMUSG00000041890	Git2	chr5	-	114752278	114752330	114752278	114752327	114753147	114753153	1751	24236	922	2189	0	153	150	3.72115e-06	0.000711515	0.723,0.919,0.746	1.0,1.0,1.0	-0.204	chr5:114752330-114753148(-)	chr5:114752327-114753148(-)
ENSMUSG00000041890	Git2	chr5	-	114752278	114752330	114752278	114752327	114753278	114753324	1752	358274142	485413166	133512280	181686393	153	150	0.950073	1	0.42,0.394,0.456	0.419,0.423,0.411	0.006	chr5:114752330-114753279(-)	chr5:114752327-114753279(-)
ENSMUSG00000058818	Pirb	chr7	-	3716033	3716336	3716033	3716217	3716593	3717426	1753	321312	1107	126128	51916	269	150	0.349678	1	0.619,1.0,0.489	0.572,0.642,0.494	0.133	chr7:3716336-3716594(-)	chr7:3716217-3716594(-)
ENSMUSG00000007207	Stx1a	chr5	+	135048910	135049104	135048993	135049104	135045596	135045734	1755	10138	20	54	1	233	150	1	1	1.0,0.807,1.0	NA,1.0,0.72	0.076	chr5:135045734-135048911(+)	chr5:135045734-135048994(+)
ENSMUSG00000034135	Sik3	chr9	+	46211669	46212562	46211849	46212562	46210475	46210815	1757	495316173	200	136611329	1	300	150	1	1	0.992,1.0,1.0	1.0,1.0,0.994	-0.001	chr9:46210815-46211670(+)	chr9:46210815-46211850(+)
ENSMUSG00000034135	Sik3	chr9	+	46221066	46221234	46221159	46221234	46220209	46220342	1758	372357126	0	101442252	1	243	150	1	1	1.0,1.0,1.0	1.0,1.0,0.994	0.002	chr9:46220342-46221067(+)	chr9:46220342-46221160(+)
ENSMUSG00000018669	Cdk5rap3	chr11	-	96912216	96912436	96912216	96912395	96913005	96913054	1762	34164	547428208	43016	205726398	191	150	0.40273	1	0.047,0.029,0.015	0.015,0.031,0.031	0.005	chr11:96912436-96913006(-)	chr11:96912395-96913006(-)
ENSMUSG00000018669	Cdk5rap3	chr11	-	96913664	96913877	96913664	96913796	96916150	96916196	1764	485211	709523285	162826	2211150588	231	150	0.000162147	0.00885827	0.042,0.061,0.024	0.045,0.016,0.028	0.013	chr11:96913877-96916151(-)	chr11:96913796-96916151(-)
ENSMUSG00000039958	Etfbkmt	chr6	+	149144014	149144442	149144033	149144442	149141512	149141704	1765	614	192320	0	137841	169	150	4.44361e-06	0.000784297	0.219,0.037,0.151	0.0,0.0,0.0	0.136	chr6:149141704-149144015(+)	chr6:149141704-149144034(+)
ENSMUSG00000039958	Etfbkmt	chr6	+	149144014	149144442	149144033	149144442	149142605	149142715	1766	410	281111	10	12389	169	150	0.143439	0.647876	0.113,0.075,0.0	0.0,0.023,0.0	0.055	chr6:149142715-149144015(+)	chr6:149142715-149144034(+)
ENSMUSG00000028689	Ccdc163	chr4	+	116709437	116709619	116709481	116709619	116709239	116709273	1769	15415464	242	73204107	53	194	150	0.95754	1	0.983,0.967,0.961	1.0,0.969,0.965	-0.008	chr4:116709273-116709438(+)	chr4:116709273-116709482(+)
ENSMUSG00000028689	Ccdc163	chr4	+	116711285	116711378	116711310	116711378	116710100	116710284	1772	562416	1076534	195232	1413774	175	150	0.541332	1	0.31,0.24,0.287	0.538,0.245,0.27	-0.072	chr4:116710284-116711286(+)	chr4:116710284-116711311(+)
ENSMUSG00000028689	Ccdc163	chr4	+	116714015	116714149	116714087	116714149	116712722	116712826	1775	365116	775919	186728	278573	222	150	0.607161	1	0.24,0.369,0.363	0.311,0.348,0.206	0.036	chr4:116712826-116714016(+)	chr4:116712826-116714088(+)
ENSMUSG00000036860	Mrpl55	chr11	+	59204534	59204757	59204555	59204757	59204171	59204255	1778	944637	337186114	39159107	123465302	171	150	0.133361	0.618545	0.197,0.178,0.222	0.218,0.231,0.237	-0.03	chr11:59204255-59204535(+)	chr11:59204255-59204556(+)
ENSMUSG00000036825	Ssx2ip	chr3	+	146432972	146433146	146432975	146433146	146432480	146432617	1781	11911563	706641	49199129	277736	153	150	0.0120487	0.153563	0.625,0.631,0.601	0.64,0.717,0.778	-0.093	chr3:146432617-146432973(+)	chr3:146432617-146432976(+)
ENSMUSG00000000838	Fmr1	chrX	+	68712230	68712413	68712305	68712413	68710583	68710779	1788	575400204	1064924	197605393	4715689	225	150	0.000203197	0.0102469	0.783,0.845,0.85	0.736,0.721,0.746	0.092	chrX:68710779-68712231(+)	chrX:68710779-68712306(+)
ENSMUSG00000000838	Fmr1	chrX	+	68715513	68717963	68715564	68717963	68713240	68713323	1789	10142	809610286	8218	3231185640	201	150	0.594014	1	0.009,0.017,0.005	0.018,0.013,0.009	-0.003	chrX:68713323-68715514(+)	chrX:68713323-68715565(+)
ENSMUSG00000041718	Alg13	chrX	+	144319898	144320061	144320002	144320061	144318022	144318121	1791	20612170	33137	56250183	82116	254	150	0.126858	0.608206	0.787,0.846,0.855	0.805,0.875,0.871	-0.021	chrX:144318121-144319899(+)	chrX:144318121-144320003(+)
ENSMUSG00000029674	Limk1	chr5	-	134662102	134662162	134662102	134662157	134664184	134664316	1792	291195108	0	98478204	112	155	150	1	1	1.0,1.0,1.0	0.99,0.998,0.99	0.007	chr5:134662162-134664185(-)	chr5:134662157-134664185(-)
ENSMUSG00000028906	Epb41	chr4	-	131967787	131967975	131967787	131967972	131974683	131974856	1798	511395185	363321	174770432	97540	153	150	0.713037	1	0.933,0.921,0.896	0.95,0.91,0.914	-0.008	chr4:131967975-131974684(-)	chr4:131967972-131974684(-)
ENSMUSG00000039660	Spout1	chr2	-	30175918	30176002	30175918	30175991	30176361	30176492	1800	211413	449341201	174927	153733378	161	150	0.0245445	0.237126	0.042,0.037,0.057	0.094,0.059,0.062	-0.026	chr2:30176002-30176362(-)	chr2:30175991-30176362(-)
ENSMUSG00000028573	Fggy	chr4	+	95820881	95822125	95821977	95822125	95812107	95812169	1802	24100	222512	297	125318	300	150	0.0915998	0.513877	0.353,0.167,0.0	0.077,0.078,0.163	0.067	chr4:95812169-95820882(+)	chr4:95812169-95821978(+)
ENSMUSG00000006732	Mettl1	chr10	+	127044996	127045127	127045025	127045127	127044755	127044869	1804	17144	395234136	83923	140587351	179	150	0.0924321	0.515396	0.035,0.048,0.024	0.046,0.053,0.052	-0.015	chr10:127044869-127044997(+)	chr10:127044869-127045026(+)
ENSMUSG00000051113	Fam71e1	chr7	+	44497405	44497633	44497502	44497633	44496914	44497033	1809	585	240	181	41	247	150	0.906218	1	0.603,0.548,1.0	1.0,0.548,0.378	0.075	chr7:44497033-44497406(+)	chr7:44497033-44497503(+)
ENSMUSG00000089832	Shkbp1	chr7	-	27342645	27342760	27342645	27342757	27343242	27343421	1811	328198126	31166	123488329	103412	153	150	0.183116	0.73819	0.912,0.924,0.954	0.923,0.934,0.964	-0.01	chr7:27342760-27343243(-)	chr7:27342757-27343243(-)
ENSMUSG00000089832	Shkbp1	chr7	-	27351979	27352128	27351979	27352070	27352594	27352756	1812	10136	29422399	1720	94428221	208	150	0.486649	1	0.024,0.04,0.042	0.008,0.012,0.061	0.008	chr7:27352128-27352595(-)	chr7:27352070-27352595(-)
ENSMUSG00000018974	Sart3	chr5	-	113754232	113754371	113754232	113754327	113755369	113755525	1814	687514244	20	223934545	53	194	150	1	1	1.0,0.995,1.0	1.0,0.993,0.993	0.003	chr5:113754371-113755370(-)	chr5:113754327-113755370(-)
ENSMUSG00000015656	Hspa8	chr9	+	40801917	40802127	40801988	40802127	40801301	40801348	1816	269992072010721	592	95254006123321	6248	221	150	1	1	1.0,0.999,1.0	0.999,0.999,0.999	0.001	chr9:40801348-40801918(+)	chr9:40801348-40801989(+)
ENSMUSG00000036281	Snapc4	chr2	-	26374491	26374564	26374491	26374560	26374642	26374747	1819	17019263	9156	72228173	2412	154	150	1	1	0.948,0.926,0.911	1.0,0.902,0.934	-0.017	chr2:26374564-26374643(-)	chr2:26374560-26374643(-)
ENSMUSG00000028898	Trnau1ap	chr4	-	132325207	132326045	132325207	132325260	132328468	132328566	1820	276199109	131412	87410231	72114	300	150	0.56455	1	0.914,0.877,0.82	0.861,0.907,0.892	-0.016	chr4:132326045-132328469(-)	chr4:132325260-132328469(-)
ENSMUSG00000026933	Camsap1	chr2	-	25935461	25935564	25935461	25935561	25935849	25936058	1821	557213	14122	288653	22910	153	150	0.631086	1	0.794,0.855,0.864	0.932,0.744,0.839	-0.001	chr2:25935564-25935850(-)	chr2:25935561-25935850(-)
ENSMUSG00000015087	Rabl6	chr2	-	25598144	25598197	25598144	25598192	25601350	25601398	1822	690520289	414	2471011560	342	155	150	1	1	0.994,0.998,0.986	0.988,0.996,0.996	-0.001	chr2:25598197-25601351(-)	chr2:25598192-25601351(-)
ENSMUSG00000056673	Kdm5d	chrY	+	910656	910849	910685	910849	910447	910586	1823	16180	1521460	5013	550139	179	150	1	1	0.081,0.094,NA	0.071,NA,0.073	0.015	chrY:910586-910657(+)	chrY:910586-910686(+)
ENSMUSG00000056673	Kdm5d	chrY	+	927602	927891	927709	927891	927244	927439	1824	56690	1031030	22037	37060	257	150	1	1	0.241,0.281,NA	0.258,NA,0.265	-0.001	chrY:927439-927603(+)	chrY:927439-927710(+)
ENSMUSG00000034610	Tut4	chr4	+	108549225	108549413	108549240	108549413	108548054	108548170	1825	898316	23217561	216462	86256157	165	150	0.0953248	0.523765	0.259,0.301,0.193	0.182,0.185,0.264	0.041	chr4:108548170-108549226(+)	chr4:108548170-108549241(+)
ENSMUSG00000038425	Poli	chr18	-	70525375	70525528	70525375	70525459	70526556	70526721	1826	23218464	210	63248148	2106	219	150	0.000173443	0.00925497	0.988,0.992,1.0	0.956,0.944,0.944	0.045	chr18:70525528-70526557(-)	chr18:70525459-70526557(-)
ENSMUSG00000031004	Mki67	chr7	-	135707360	135708320	135707360	135707486	135708765	135708811	1828	470535051671	603922	131447142575	309442	300	150	0.00213117	0.0504121	0.975,0.978,0.974	0.956,0.962,0.968	0.014	chr7:135708320-135708766(-)	chr7:135707486-135708766(-)
ENSMUSG00000037922	Bank1	chr3	-	136100280	136100589	136100280	136100382	136103849	136103928	1829	582625	0	246331	200	300	150	1	1	1.0,1.0,1.0	0.857,1.0,1.0	0.048	chr3:136100589-136103850(-)	chr3:136100382-136103850(-)
ENSMUSG00000027104	Atf2	chr2	-	73880284	73880381	73880284	73880379	73892474	73892628	1830	622521251	1085	200854462	52310	152	150	0.114381	0.572404	0.984,0.985,0.98	0.975,0.973,0.979	0.007	chr2:73880381-73892475(-)	chr2:73880379-73892475(-)
ENSMUSG00000006335	Tfpt	chr7	-	3628827	3629112	3628827	3629086	3629551	3629579	1832	221	22317069	152	76272175	176	150	1	1	0.008,0.01,0.012	0.011,0.015,0.01	-0.002	chr7:3629112-3629552(-)	chr7:3629086-3629552(-)
ENSMUSG00000031537	Ikbkb	chr8	-	22669606	22669730	22669606	22669725	22671630	22671745	1833	284200121	10125	112462232	296	155	150	0.0167788	0.186888	0.965,0.942,0.959	0.982,0.98,0.974	-0.023	chr8:22669730-22671631(-)	chr8:22669725-22671631(-)
ENSMUSG00000029106	Add1	chr5	+	34629135	34629172	34629138	34629172	34628414	34628513	1834	19616757	1767	100261215	31815	153	150	0.714617	1	0.919,0.965,0.889	0.97,0.934,0.934	-0.022	chr5:34628513-34629136(+)	chr5:34628513-34629139(+)
ENSMUSG00000038517	Tbkbp1	chr11	-	97146454	97146633	97146454	97146630	97147372	97147553	1837	766734	474714	1013055	147035	153	150	0.592767	1	0.613,0.583,0.704	0.412,0.645,0.606	0.079	chr11:97146633-97147373(-)	chr11:97146630-97147373(-)
ENSMUSG00000040782	Cop1	chr1	+	159319723	159319840	159319747	159319840	159308882	159308964	1840	906700358	322	3551504872	34	174	150	1	1	0.996,0.997,0.994	1.0,0.998,0.995	-0.002	chr1:159308964-159319724(+)	chr1:159308964-159319748(+)
ENSMUSG00000033124	Atg9a	chr1	-	75186189	75187186	75186189	75186938	75187684	75187826	1842	574813	293179126	228835	107448236	300	150	0.688851	1	0.089,0.118,0.049	0.093,0.089,0.069	0.002	chr1:75187186-75187685(-)	chr1:75186938-75187685(-)
ENSMUSG00000027843	Ptpn22	chr3	+	103903369	103903485	103903377	103903485	103902113	103902191	1847	435265131	100	125563334	20	158	150	1	1	0.998,1.0,1.0	1.0,0.996,1.0	0.001	chr3:103902191-103903370(+)	chr3:103902191-103903378(+)
ENSMUSG00000068115	Ninl	chr2	-	150966077	150966364	150966077	150966242	150969979	150970132	1848	340	883	221	1117	272	150	0.610404	1	0.171,0.216,0.0	0.524,0.091,0.073	-0.1	chr2:150966364-150969980(-)	chr2:150966242-150969980(-)
ENSMUSG00000026427	Eif2d	chr1	+	131160409	131160624	131160462	131160624	131158191	131158299	1850	614490254	110	2331012599	75	203	150	1	1	0.998,0.997,1.0	1.0,0.991,0.989	0.005	chr1:131158299-131160410(+)	chr1:131158299-131160463(+)
ENSMUSG00000020220	Vps13d	chr4	-	145099964	145100070	145099964	145100067	145103613	145103688	1851	465	1341	637	6122	153	150	0.778365	1	0.232,0.595,0.831	0.495,0.197,0.774	0.064	chr4:145100070-145103614(-)	chr4:145100067-145103614(-)
ENSMUSG00000035735	Dagla	chr19	-	10254806	10255062	10254806	10254949	10255660	10255741	1854	0	400	20	20	263	150	1	1	0.0,NA,NA	NA,0.363,NA	-0.363	chr19:10255062-10255661(-)	chr19:10254949-10255661(-)
ENSMUSG00000003421	Nosip	chr7	+	45076551	45076739	45076626	45076739	45076309	45076428	1855	702430223	823817	215935573	154940	225	150	0.00265205	0.0593355	0.851,0.883,0.897	0.905,0.927,0.905	-0.035	chr7:45076428-45076552(+)	chr7:45076428-45076627(+)
ENSMUSG00000014599	Csf1	chr3	-	107748153	107749169	107748153	107748284	107750310	107750458	1856	13513465	730	4929890	52	300	150	0.251819	0.868089	0.906,0.957,1.0	1.0,0.968,0.957	-0.021	chr3:107749169-107750311(-)	chr3:107748284-107750311(-)
ENSMUSG00000017418	Arl5b	chr2	+	15069819	15069967	15069836	15069967	15068138	15068199	1857	1067729	400	2514863	0	167	150	0.651573	1	0.96,1.0,1.0	1.0,1.0,1.0	-0.013	chr2:15068199-15069820(+)	chr2:15068199-15069837(+)
ENSMUSG00000017418	Arl5b	chr2	+	15069819	15069967	15069857	15069967	15068138	15068199	1858	1188129	16144	2616982	22110	188	150	0.432062	1	0.855,0.822,0.853	0.912,0.865,0.867	-0.038	chr2:15068199-15069820(+)	chr2:15068199-15069858(+)
ENSMUSG00000017418	Arl5b	chr2	+	15069836	15069967	15069857	15069967	15068138	15068199	1859	1640	16144	12119	22110	171	150	0.0545478	0.378699	0.467,0.2,0.0	0.305,0.467,0.625	-0.243	chr2:15068199-15069837(+)	chr2:15068199-15069858(+)
ENSMUSG00000018796	Acsl1	chr8	+	46533365	46533467	46533381	46533467	46531787	46531931	1861	1300787444	1	4591533929	222	166	150	1	1	1.0,1.0,0.998	0.995,0.999,0.998	0.002	chr8:46531931-46533366(+)	chr8:46531931-46533382(+)
ENSMUSG00000026767	Mindy3	chr2	-	12403997	12404168	12403997	12404166	12405859	12405920	1865	23217374	401	81398221	130	152	150	0.316399	0.959654	0.983,1.0,0.986	1.0,0.968,1.0	0	chr2:12404168-12405860(-)	chr2:12404166-12405860(-)
ENSMUSG00000026773	Pfkfb3	chr2	-	11486218	11486391	11486218	11486343	11488725	11488782	1866	221215	707556258	153517	2701078635	198	150	0.776579	1	0.023,0.016,0.042	0.04,0.024,0.02	-0.001	chr2:11486391-11488726(-)	chr2:11486343-11488726(-)
ENSMUSG00000041355	Ssr2	chr3	+	88583736	88583885	88583799	88583885	88580973	88581038	1870	655445275	18314	237932567	73816	213	150	0.15257	0.673861	0.962,0.991,0.933	0.96,0.945,0.961	0.007	chr3:88581038-88583737(+)	chr3:88581038-88583800(+)
ENSMUSG00000021156	Zmynd11	chr13	-	9695128	9695184	9695128	9695181	9695738	9695826	1874	408280106	841	114490306	91012	153	150	0.0120758	0.153563	0.98,0.986,0.99	0.925,0.98,0.962	0.03	chr13:9695184-9695739(-)	chr13:9695181-9695739(-)
ENSMUSG00000050708	Ftl1	chr7	-	45458534	45458681	45458534	45458660	45459083	45459230	1875	540430193	1121775214396	200912505	4116174159789	171	150	0.808183	1	0.041,0.048,0.037	0.041,0.044,0.043	-0.001	chr7:45458681-45459084(-)	chr7:45458660-45459084(-)
ENSMUSG00000043467	Zbtb37	chr1	-	161031804	161032764	161031804	161032761	161034087	161034284	1876	12127	44407	111710	154417	153	150	0.428081	1	0.211,0.227,0.495	0.418,0.275,0.366	-0.042	chr1:161032764-161034088(-)	chr1:161032761-161034088(-)
ENSMUSG00000033669	Zfp7	chr15	+	76881111	76881238	76881114	76881238	76880738	76880782	1878	311920	1	197043	0	153	150	1	1	1.0,1.0,0.951	1.0,1.0,1.0	-0.016	chr15:76880782-76881112(+)	chr15:76880782-76881115(+)
ENSMUSG00000028795	Ccdc28b	chr4	-	129620682	129620876	129620682	129620853	129620983	129621150	1879	29323097	1634	137367259	2209	173	150	0.677768	1	0.941,0.985,0.955	0.983,0.941,0.961	-0.001	chr4:129620876-129620984(-)	chr4:129620853-129620984(-)
ENSMUSG00000008668	Rps18	chr17	-	33952220	33952312	33952220	33952293	33952402	33952591	1880	433533319516001	22244	165506513639941	32924	169	150	1	1	0.999,0.999,1.0	1.0,0.999,0.999	0	chr17:33952312-33952403(-)	chr17:33952293-33952403(-)
ENSMUSG00000028149	Rap1gds1	chr3	-	138955321	138955461	138955321	138955458	138956193	138956319	1883	527372178	1356333	171646352	3615590	153	150	0.307389	0.950384	0.793,0.853,0.841	0.823,0.803,0.793	0.023	chr3:138955461-138956194(-)	chr3:138955458-138956194(-)
ENSMUSG00000000154	Slc22a18	chr7	+	143492805	143492942	143492841	143492942	143491745	143491853	1886	433	271410	90	71411	186	150	0.654725	1	0.107,0.147,0.195	0.0,0.341,0.0	0.036	chr7:143491853-143492806(+)	chr7:143491853-143492842(+)
ENSMUSG00000028107	Tars2	chr3	-	95742073	95742223	95742073	95742146	95742315	95742417	1888	2077	351323134	42712	135506272	227	150	0.687725	1	0.036,0.014,0.033	0.019,0.034,0.028	0.001	chr3:95742223-95742316(-)	chr3:95742146-95742316(-)
ENSMUSG00000028107	Tars2	chr3	-	95748486	95748633	95748486	95748554	95750338	95750417	1889	666498235	11147	230925543	22412	229	150	0.859523	1	0.975,0.959,0.957	0.987,0.962,0.967	-0.008	chr3:95748633-95750339(-)	chr3:95748554-95750339(-)
ENSMUSG00000028107	Tars2	chr3	-	95750837	95751027	95750837	95750984	95751505	95751630	1890	19208	370282116	52411	109487292	193	150	0.183557	0.73819	0.038,0.052,0.051	0.034,0.037,0.028	0.014	chr3:95751027-95751506(-)	chr3:95750984-95751506(-)
ENSMUSG00000027589	Pcmtd2	chr2	+	181851581	181851709	181851585	181851709	181846467	181846639	1894	211713	16013056	22213	50189119	154	150	0.112746	0.571345	0.113,0.113,0.184	0.038,0.102,0.096	0.058	chr2:181846639-181851582(+)	chr2:181846639-181851586(+)
ENSMUSG00000055884	Fancm	chr12	+	65101519	65101712	65101560	65101712	65099247	65099452	1902	362615	12612547	114627	3316490	191	150	0.526326	1	0.183,0.14,0.2	0.207,0.181,0.191	-0.019	chr12:65099452-65101520(+)	chr12:65099452-65101561(+)
ENSMUSG00000043019	Edem3	chr1	+	151805846	151805946	151805849	151805946	151804664	151804819	1904	25710	383294157	6221	93461223	153	150	0.204286	0.782528	0.06,0.023,0.059	0.059,0.045,0.004	0.011	chr1:151804819-151805847(+)	chr1:151804819-151805850(+)
ENSMUSG00000016494	Cd34	chr1	+	194949304	194949564	194949381	194949564	194947838	194948006	1906	414033971420	1042	119957823506	21413	227	150	1	1	0.996,0.998,0.998	0.997,0.996,0.994	0.002	chr1:194948006-194949305(+)	chr1:194948006-194949382(+)
ENSMUSG00000016494	Cd34	chr1	+	194959779	194961279	194959935	194961279	194959065	194959230	1907	686502231	22451575648	50423971368	40117891187	300	150	0	0	0.133,0.137,0.151	0.386,0.401,0.366	-0.244	chr1:194959230-194959780(+)	chr1:194959230-194959936(+)
ENSMUSG00000069844	Sco1	chr11	+	67055715	67055928	67055730	67055928	67053774	67053865	1910	10	22415483	291	95412181	165	150	0.817138	1	0.0,0.006,0.0	0.019,0.019,0.005	-0.012	chr11:67053865-67055716(+)	chr11:67053865-67055731(+)
ENSMUSG00000073460	Pnldc1	chr17	-	12890278	12890454	12890278	12890428	12890720	12890820	1911	721	10	21810	0	176	150	1	1	1.0,0.63,1.0	1.0,1.0,1.0	-0.123	chr17:12890454-12890721(-)	chr17:12890428-12890721(-)
ENSMUSG00000073460	Pnldc1	chr17	-	12894359	12894611	12894359	12894415	12895511	12895597	1912	1420	220	162	250	300	150	1	1	0.778,0.333,NA	0.2,0.375,1.0	0.03	chr17:12894611-12895512(-)	chr17:12894415-12895512(-)
ENSMUSG00000073460	Pnldc1	chr17	-	12897260	12897333	12897260	12897330	12899532	12899676	1913	202	300	0	251	153	150	1	1	0.395,NA,1.0	0.0,0.0,0.0	0.698	chr17:12897333-12899533(-)	chr17:12897330-12899533(-)
ENSMUSG00000037474	Dtl	chr1	-	191568290	191568411	191568290	191568404	191568494	191568556	1914	543449222	6127	224831445	3219	157	150	1	1	0.989,0.973,0.968	0.986,0.974,0.979	-0.003	chr1:191568411-191568495(-)	chr1:191568404-191568495(-)
ENSMUSG00000017652	Cd40	chr2	+	165062211	165062364	165062285	165062364	165055626	165055758	1916	200	100	0	240	224	150	1	1	0.573,NA,NA	0.0,0.0,NA	0.573	chr2:165055758-165062212(+)	chr2:165055758-165062286(+)
ENSMUSG00000027751	Supt20	chr3	+	54701486	54701616	54701489	54701616	54698592	54698659	1921	280209109	28623695	127335201	135426199	153	150	0.42158	1	0.49,0.465,0.529	0.48,0.435,0.498	0.024	chr3:54698659-54701487(+)	chr3:54698659-54701490(+)
ENSMUSG00000027751	Supt20	chr3	+	54715153	54715256	54715156	54715256	54714687	54714796	1922	458360162	252210	146692369	133434	153	150	0.374184	1	0.947,0.941,0.941	0.917,0.952,0.914	0.015	chr3:54714796-54715154(+)	chr3:54714796-54715157(+)
ENSMUSG00000027751	Supt20	chr3	+	54716637	54717645	54717575	54717645	54715533	54715689	1923	505453189	1066139	200661368	5012156	300	150	0.766951	1	0.704,0.788,0.708	0.667,0.732,0.767	0.011	chr3:54715689-54716638(+)	chr3:54715689-54717576(+)
ENSMUSG00000027751	Supt20	chr3	+	54722520	54722640	54722556	54722640	54720405	54720461	1924	358261137	693821	90456290	99264	186	150	0.451488	1	0.807,0.847,0.84	0.89,0.8,0.785	0.006	chr3:54720461-54722521(+)	chr3:54720461-54722557(+)
ENSMUSG00000017715	Pgs1	chr11	+	118014573	118014722	118014646	118014722	118005369	118005891	1928	272233118	332215	101431295	116127	223	150	0.785696	1	0.847,0.877,0.841	0.861,0.826,0.88	-0.001	chr11:118005891-118014574(+)	chr11:118005891-118014647(+)
ENSMUSG00000047412	Zbtb44	chr9	+	31064178	31064342	31064232	31064342	31062040	31062125	1929	468447176	624218	167657395	165847	204	150	0.514484	1	0.847,0.887,0.878	0.885,0.893,0.861	-0.009	chr9:31062125-31064179(+)	chr9:31062125-31064233(+)
ENSMUSG00000028184	Adgrl2	chr3	-	148820972	148821054	148820972	148821025	148822954	148823051	1936	11216	156	1148	144	179	150	0.370942	1	0.902,0.779,0.456	1.0,0.456,0.626	0.018	chr3:148821054-148822955(-)	chr3:148821025-148822955(-)
ENSMUSG00000028184	Adgrl2	chr3	-	148852566	148852860	148852566	148852662	148858732	148859533	1938	28830898	0	92344218	31	300	150	1	1	1.0,1.0,1.0	1.0,0.983,0.991	0.009	chr3:148852860-148858733(-)	chr3:148852662-148858733(-)
ENSMUSG00000026339	Ccdc93	chr1	+	121462232	121462283	121462235	121462283	121461886	121461979	1942	16016580	17173	70246136	31711	153	150	0.280259	0.90142	0.902,0.905,0.963	0.958,0.934,0.924	-0.015	chr1:121461979-121462233(+)	chr1:121461979-121462236(+)
ENSMUSG00000020893	Per1	chr11	+	69101674	69101876	69101734	69101876	69101450	69101572	1944	612338179	0	138612484	273	210	150	0.7403	1	1.0,1.0,1.0	0.98,0.984,0.991	0.015	chr11:69101572-69101675(+)	chr11:69101572-69101735(+)
ENSMUSG00000037816	Fbxw17	chr13	+	50432170	50432346	50432175	50432346	50431539	50431750	1946	393623	9104	134526	82210	155	150	0.0174236	0.192293	0.807,0.777,0.848	0.611,0.664,0.716	0.147	chr13:50431750-50432171(+)	chr13:50431750-50432176(+)
ENSMUSG00000040734	Ppp1r13l	chr7	+	19368541	19368622	19368545	19368622	19361026	19361316	1950	201411	1090	52022	293	154	150	0.673105	1	0.661,0.602,1.0	0.709,0.684,0.877	-0.002	chr7:19361316-19368542(+)	chr7:19361316-19368546(+)
ENSMUSG00000052760	A630001G21Rik	chr1	-	85723097	85723387	85723097	85723181	85725120	85725289	1952	520466178	23813377	162594288	97428199	300	150	2.01013e-05	0.00224987	0.522,0.637,0.536	0.455,0.41,0.42	0.137	chr1:85723387-85725121(-)	chr1:85723181-85725121(-)
ENSMUSG00000052760	A630001G21Rik	chr1	-	85726458	85726615	85726458	85726502	85736471	85736581	1954	760530240	363518	2611006432	156122	263	150	0.886979	1	0.923,0.896,0.884	0.908,0.904,0.918	-0.009	chr1:85726615-85736472(-)	chr1:85726502-85736472(-)
ENSMUSG00000042207	Kdm5b	chr1	+	134593328	134593463	134593337	134593463	134588776	134588947	1955	452473174	122	138636310	8	159	150	0.890728	1	0.998,0.996,0.988	1.0,1.0,0.973	0.003	chr1:134588947-134593329(+)	chr1:134588947-134593338(+)
ENSMUSG00000004018	Fancl	chr11	+	26468800	26468882	26468815	26468882	26468671	26468717	1956	1167639	200	40200103	0	165	150	1	1	0.981,1.0,1.0	1.0,1.0,1.0	-0.006	chr11:26468717-26468801(+)	chr11:26468717-26468816(+)
ENSMUSG00000004018	Fancl	chr11	+	26470806	26470948	26470876	26470948	26469651	26469768	1957	1323	1058149	2159	47178134	220	150	0.901499	1	0.078,0.017,0.04	0.028,0.054,0.044	0.003	chr11:26469768-26470807(+)	chr11:26469768-26470877(+)
ENSMUSG00000061286	Exosc5	chr7	+	25664247	25664448	25664326	25664448	25663136	25663250	1958	1719873	14861015504	56280163	42717101077	229	150	0.0148164	0.175239	0.07,0.059,0.087	0.079,0.097,0.09	-0.017	chr7:25663250-25664248(+)	chr7:25663250-25664327(+)
ENSMUSG00000022957	Itsn1	chr16	+	91801526	91801706	91801637	91801706	91793606	91793767	1959	9911228	30	2713368	20	261	150	1	1	1.0,0.955,1.0	1.0,0.975,1.0	-0.007	chr16:91793767-91801527(+)	chr16:91793767-91801638(+)
ENSMUSG00000028249	Sdcbp	chr4	+	6385025	6385187	6385028	6385187	6380989	6381099	1962	15751185590	428346170	60021921244	150697351	153	150	0.903803	1	0.783,0.771,0.773	0.797,0.755,0.777	-0.001	chr4:6381099-6385026(+)	chr4:6381099-6385029(+)
ENSMUSG00000031389	Arhgap4	chrX	-	73896813	73896997	73896813	73896992	73897080	73897154	1964	470287203	14107	197729414	288	155	150	0.00343069	0.0684497	0.97,0.965,0.966	0.99,0.989,0.98	-0.019	chrX:73896997-73897081(-)	chrX:73896992-73897081(-)
ENSMUSG00000031389	Arhgap4	chrX	-	73897968	73898046	73897968	73898013	73898131	73898192	1965	814531316	20	3111285643	222	183	150	1	1	1.0,0.995,1.0	0.992,0.998,0.996	0.003	chrX:73898046-73898132(-)	chrX:73898013-73898132(-)
ENSMUSG00000031389	Arhgap4	chrX	-	73900277	73900469	73900277	73900385	73900634	73900736	1968	1347928473	500	5141978989	12	234	150	1	1	0.994,1.0,1.0	1.0,0.999,0.997	-0.001	chrX:73900469-73900635(-)	chrX:73900385-73900635(-)
ENSMUSG00000031389	Arhgap4	chrX	-	73905650	73905893	73905650	73905863	73906156	73906219	1969	612921	17112273	84627	114419270	180	150	1.03703e-09	7.93155e-07	0.229,0.165,0.193	0.055,0.084,0.077	0.124	chrX:73905893-73906157(-)	chrX:73905863-73906157(-)
ENSMUSG00000056476	Med12l	chr3	+	59262862	59263286	59263124	59263286	59262209	59262345	1972	1084	33459	445	85124	300	150	0.207787	0.78935	0.132,0.082,0.182	0.2,0.038,0.094	0.021	chr3:59262345-59262863(+)	chr3:59262345-59263125(+)
ENSMUSG00000034022	Cpsf1	chr15	-	76596219	76596571	76596219	76596349	76596650	76596698	1973	816680312	155	3091107616	384	300	150	0.639989	1	0.998,0.986,0.969	0.981,0.986,0.987	0	chr15:76596571-76596651(-)	chr15:76596349-76596651(-)
ENSMUSG00000034022	Cpsf1	chr15	-	76602508	76602648	76602508	76602587	76602790	76602937	1975	1027741366	15615	3581313698	73326	211	150	0.0230381	0.226569	0.98,0.989,0.945	0.973,0.966,0.95	0.008	chr15:76602648-76602791(-)	chr15:76602587-76602791(-)
ENSMUSG00000034022	Cpsf1	chr15	-	76603511	76603645	76603511	76603569	76603723	76603751	1976	814553299	12175	2831100724	96	226	150	0.000451913	0.0172819	0.978,0.956,0.975	1.0,0.988,0.988	-0.022	chr15:76603645-76603724(-)	chr15:76603569-76603724(-)
ENSMUSG00000026150	Mff	chr1	+	82735415	82735507	82735418	82735507	82731112	82731282	1977	292254103	357282131	107450291	121538375	153	150	0.865516	1	0.445,0.469,0.435	0.464,0.451,0.432	0.001	chr1:82731282-82735416(+)	chr1:82731282-82735419(+)
ENSMUSG00000066026	Dhrs3	chr4	+	144919229	144919504	144919384	144919504	144918650	144918794	1982	946023	381272126	3312667	115364234	300	150	0.0189853	0.201675	0.11,0.099,0.084	0.125,0.148,0.125	-0.035	chr4:144918794-144919230(+)	chr4:144918794-144919385(+)
ENSMUSG00000039205	Ciz1	chr2	+	32370031	32370125	32370046	32370125	32367302	32367532	1985	390290141	626235	130492278	3210259	165	150	0.508929	1	0.851,0.81,0.786	0.787,0.814,0.811	0.012	chr2:32367532-32370032(+)	chr2:32367532-32370047(+)
ENSMUSG00000030741	Spns1	chr7	-	126373921	126374073	126373921	126373973	126375066	126375203	1987	25016493	522	80345193	145	250	150	0.968429	1	0.968,0.98,0.965	0.98,0.981,0.959	-0.002	chr7:126374073-126375067(-)	chr7:126373973-126375067(-)
ENSMUSG00000026197	Zfand2b	chr1	+	75168830	75168906	75168833	75168906	75168645	75168707	1988	634143	20152	178744	62622	153	150	0.135702	0.625239	0.755,0.728,0.955	0.735,0.766,0.662	0.092	chr1:75168707-75168831(+)	chr1:75168707-75168834(+)
ENSMUSG00000021972	Hmbox1	chr14	-	64825600	64825695	64825600	64825692	64826771	64826867	1989	18814869	15212861	63296115	5519985	153	150	0.274105	0.892679	0.548,0.531,0.526	0.529,0.593,0.57	-0.029	chr14:64825695-64826772(-)	chr14:64825692-64826772(-)
ENSMUSG00000005506	Celf1	chr2	+	91006619	91006695	91006631	91006695	91004700	91004862	1998	391326122	804734	131545249	177354	162	150	0.178352	0.732072	0.819,0.865,0.769	0.877,0.874,0.81	-0.036	chr2:91004862-91006620(+)	chr2:91004862-91006632(+)
ENSMUSG00000005506	Celf1	chr2	+	91009201	91009315	91009204	91009315	91008171	91008300	1999	12810446	25116176	5620192	61302180	153	150	0.400062	1	0.333,0.388,0.372	0.474,0.395,0.334	-0.037	chr2:91008300-91009202(+)	chr2:91008300-91009205(+)
ENSMUSG00000005506	Celf1	chr2	+	91013490	91019490	91016565	91019490	91013237	91013402	2000	835554259	416330	2191134480	4610782	300	150	0.0026765	0.0593355	0.911,0.815,0.812	0.704,0.841,0.745	0.083	chr2:91013402-91013491(+)	chr2:91013402-91016566(+)
ENSMUSG00000041939	Mvk	chr5	+	114450240	114450421	114450276	114450421	114446158	114446306	2003	936130	594419	208235	2611757	186	150	1.3094e-05	0.00166912	0.56,0.528,0.56	0.383,0.361,0.331	0.191	chr5:114446306-114450241(+)	chr5:114446306-114450277(+)
ENSMUSG00000029510	Gpc2	chr5	-	138275928	138276369	138275928	138276338	138276583	138277487	2007	45	644910	75	206837	181	150	0.718317	1	0.0,0.063,0.293	0.0,0.079,0.101	0.059	chr5:138276369-138276584(-)	chr5:138276338-138276584(-)
ENSMUSG00000029510	Gpc2	chr5	-	138278214	138278537	138278214	138278454	138278838	138278997	2009	434119	344813	113231	75732	233	150	0.350688	1	0.449,0.355,0.485	0.503,0.265,0.384	0.046	chr5:138278537-138278839(-)	chr5:138278454-138278839(-)
ENSMUSG00000037894	H2afz	chr3	+	137866010	137866140	137866079	137866140	137865519	137865633	2017	17480111296522	773028	64172694317044	288059	219	150	1	1	0.994,0.996,0.994	0.994,0.996,0.995	0	chr3:137865633-137866011(+)	chr3:137865633-137866080(+)
ENSMUSG00000062590	Armc9	chr1	+	86213049	86213105	86213052	86213105	86207952	86208043	2021	406423	61	167038	1112	153	150	0.0659834	0.419969	1.0,0.913,0.958	0.94,0.862,0.949	0.04	chr1:86208043-86213050(+)	chr1:86208043-86213053(+)
ENSMUSG00000062590	Armc9	chr1	+	86262038	86262165	86262041	86262165	86257225	86257362	2022	130	100	30	43	153	150	1	1	0.495,1.0,NA	NA,0.424,0.0	0.536	chr1:86257362-86262039(+)	chr1:86257362-86262042(+)
ENSMUSG00000070000	Fcho1	chr8	-	71721251	71721304	71721251	71721300	71721818	71721859	2025	870779338	647129	2931276714	189862	154	150	0.655646	1	0.93,0.914,0.919	0.941,0.927,0.918	-0.008	chr8:71721304-71721819(-)	chr8:71721300-71721819(-)
ENSMUSG00000048186	Bend7	chr2	+	4796529	4796583	4796532	4796583	4788455	4788575	2026	1	200	0	2	153	150	1	1	0.0,NA,1.0	NA,NA,0.0	0.5	chr2:4788575-4796530(+)	chr2:4788575-4796533(+)
ENSMUSG00000032816	Igdcc4	chr9	+	65126754	65126928	65126757	65126928	65125284	65125422	2027	100	200	0	42	153	150	1	1	0.329,NA,NA	NA,0.0,0.0	0.329	chr9:65125422-65126755(+)	chr9:65125422-65126758(+)
ENSMUSG00000034544	Rsrc1	chr3	+	66996464	66996590	66996470	66996590	66994516	66994712	2032	425254134	15107	119518303	2166	156	150	0.114075	0.571495	0.965,0.961,0.948	0.983,0.969,0.98	-0.019	chr3:66994712-66996465(+)	chr3:66994712-66996471(+)
ENSMUSG00000036591	Arhgap21	chr2	-	20860970	20861110	20860970	20861107	20861185	20861250	2034	674620	26419473	178756	95371184	153	150	0.920534	1	0.199,0.189,0.212	0.149,0.187,0.23	0.011	chr2:20861110-20861186(-)	chr2:20861107-20861186(-)
ENSMUSG00000028282	Casp8ap2	chr4	+	32631805	32631880	32631815	32631880	32631065	32631166	2036	433341168	540	141583367	42	160	150	1	1	0.988,0.988,1.0	1.0,0.993,0.994	-0.004	chr4:32631166-32631806(+)	chr4:32631166-32631816(+)
ENSMUSG00000033147	Slc22a15	chr3	-	101880008	101880224	101880008	101880187	101883459	101883589	2037	603921	481413	309054	134516	187	150	0.194058	0.763937	0.501,0.691,0.564	0.649,0.616,0.73	-0.08	chr3:101880224-101883460(-)	chr3:101880187-101883460(-)
ENSMUSG00000021711	Trappc13	chr13	-	104144403	104144554	104144403	104144551	104147243	104147344	2040	20616472	21016674	99424235	59362181	153	150	0.0244244	0.236463	0.49,0.492,0.488	0.622,0.535,0.56	-0.082	chr13:104144554-104147244(-)	chr13:104144551-104147244(-)
ENSMUSG00000036989	Trim3	chr7	-	105619058	105619228	105619058	105619210	105619382	105619614	2048	340	1272	103	5117	168	150	0.127764	0.608206	0.182,0.338,0.0	0.152,0.0,0.277	0.03	chr7:105619228-105619383(-)	chr7:105619210-105619383(-)
ENSMUSG00000034653	Ythdc2	chr18	+	44877617	44877795	44877643	44877795	44872840	44873133	2049	17811753	783	73303142	93	176	150	0.0315594	0.275859	0.956,0.926,0.938	1.0,0.966,0.976	-0.041	chr18:44873133-44877618(+)	chr18:44873133-44877644(+)
ENSMUSG00000026121	Sema4c	chr1	-	36555931	36556080	36555931	36556077	36558015	36558349	2050	300	251	30	23	153	150	1	1	0.595,0.0,0.0	NA,0.595,0.0	-0.099	chr1:36556080-36558016(-)	chr1:36556077-36558016(-)
ENSMUSG00000005611	Mrvi1	chr7	-	110929477	110929578	110929477	110929562	110945832	110945981	2051	210	210	44	0	166	150	1	1	0.475,0.475,NA	NA,1.0,1.0	-0.525	chr7:110929578-110945833(-)	chr7:110929562-110945833(-)
ENSMUSG00000026782	Abi2	chr1	+	60470665	60470839	60470671	60470839	60464528	60464615	2053	633821	0	108360	10	156	150	1	1	1.0,1.0,1.0	1.0,0.988,1.0	0.004	chr1:60464615-60470666(+)	chr1:60464615-60470672(+)
ENSMUSG00000020697	Lig3	chr11	+	82787627	82787828	82787630	82787828	82785314	82785458	2058	296233111	1239647	88399230	38134105	153	150	0.683536	1	0.702,0.704,0.698	0.694,0.745,0.682	-0.006	chr11:82785458-82787628(+)	chr11:82785458-82787631(+)
ENSMUSG00000025270	Alas2	chrX	+	150552958	150553081	150553003	150553081	150552148	150552344	2059	1114220	2014	1714085	197	195	150	0.488735	1	0.81,0.97,0.794	1.0,0.85,0.903	-0.06	chrX:150552344-150552959(+)	chrX:150552344-150553004(+)
ENSMUSG00000062647	Rpl7a	chr2	+	26912292	26912445	26912365	26912445	26912018	26912159	2061	611439245	18490132696838	208909579	69192838617244	223	150	0.571802	1	0.022,0.022,0.024	0.02,0.021,0.022	0.002	chr2:26912159-26912293(+)	chr2:26912159-26912366(+)
ENSMUSG00000000441	Raf1	chr6	-	115620208	115620347	115620208	115620327	115621815	115621862	2064	21154	420309172	52116	190645373	170	150	0.370346	1	0.042,0.041,0.02	0.023,0.028,0.036	0.005	chr6:115620347-115621816(-)	chr6:115620327-115621816(-)
ENSMUSG00000063455	D630045J12Rik	chr6	-	38136833	38136994	38136833	38136991	38139422	38139469	2066	952	720	52212	53	153	150	0.25791	0.873336	0.558,0.71,1.0	1.0,0.812,0.797	-0.114	chr6:38136994-38139423(-)	chr6:38136991-38139423(-)
ENSMUSG00000014850	Msh3	chr13	-	92235573	92235731	92235573	92235728	92249826	92249938	2067	1269734	403321	4317292	115127	153	150	0.196811	0.768996	0.755,0.742,0.613	0.793,0.768,0.77	-0.074	chr13:92235731-92249827(-)	chr13:92235728-92249827(-)
ENSMUSG00000014850	Msh3	chr13	-	92351230	92351451	92351230	92351360	92353224	92353342	2068	35730599	252410	88404234	125927	241	150	0.00423102	0.0787884	0.899,0.888,0.86	0.82,0.81,0.844	0.058	chr13:92351451-92353225(-)	chr13:92351360-92353225(-)
ENSMUSG00000023206	Il15ra	chr2	+	11723412	11723610	11723511	11723610	11720012	11720105	2070	17612492	701	98382179	22	249	150	0.126748	0.608206	0.938,1.0,0.982	1.0,0.991,0.982	-0.018	chr2:11720105-11723413(+)	chr2:11720105-11723512(+)
ENSMUSG00000026466	Tor1aip1	chr1	-	156018217	156018530	156018217	156018259	156022299	156022380	2071	462317	512337213	84341	204810399	300	150	0.268762	0.88858	0.043,0.033,0.038	0.019,0.026,0.049	0.007	chr1:156018530-156022300(-)	chr1:156018259-156022300(-)
ENSMUSG00000037275	Gemin5	chr11	-	58122281	58122378	58122281	58122375	58124931	58125418	2082	27818288	18412978	66351242	61224158	153	150	0.758949	1	0.597,0.58,0.525	0.515,0.606,0.6	-0.006	chr11:58122378-58124932(-)	chr11:58122375-58124932(-)
ENSMUSG00000037275	Gemin5	chr11	-	58137667	58137766	58137667	58137763	58139018	58139141	2083	249201118	12410239	102372190	3816793	153	150	0.884483	1	0.663,0.659,0.748	0.725,0.686,0.667	-0.003	chr11:58137766-58139019(-)	chr11:58137763-58139019(-)
ENSMUSG00000037437	Adam32	chr8	-	24916287	24916356	24916287	24916316	24919909	24920081	2084	200	0	0	20	190	150	1	1	1.0,NA,NA	NA,0.0,NA	1	chr8:24916356-24919910(-)	chr8:24916316-24919910(-)
ENSMUSG00000047342	Zfp286	chr11	-	62784878	62785009	62784878	62784993	62787958	62788044	2085	300	371510	15	105434	166	150	0.473055	1	0.068,0.0,0.0	0.0,0.016,0.117	-0.022	chr11:62785009-62787959(-)	chr11:62784993-62787959(-)
ENSMUSG00000026027	Stradb	chr1	+	58992892	58993137	58993098	58993137	58992650	58992755	2086	425293178	110	110521351	0	300	150	1	1	0.995,0.993,1.0	1.0,1.0,1.0	-0.004	chr1:58992755-58992893(+)	chr1:58992755-58993099(+)
ENSMUSG00000004221	Ikbkg	chrX	+	74437163	74437282	74437166	74437282	74433802	74434014	2087	22318861	592815	74342148	148344	153	150	0.367515	1	0.787,0.868,0.799	0.838,0.802,0.767	0.016	chrX:74434014-74437164(+)	chrX:74434014-74437167(+)
ENSMUSG00000025967	Eef1b2	chr1	+	63178422	63178565	63178438	63178565	63177722	63177876	2088	13012543	1223088234261	40201136	43231787911022	166	150	0.866418	1	0.01,0.013,0.009	0.008,0.01,0.011	0.001	chr1:63177876-63178423(+)	chr1:63177876-63178439(+)
ENSMUSG00000025967	Eef1b2	chr1	+	63178022	63178565	63178438	63178565	63177753	63177876	2089	390318126	1223088234261	118589352	43231787911022	300	150	0.660219	1	0.016,0.018,0.015	0.013,0.016,0.016	0.001	chr1:63177876-63178023(+)	chr1:63177876-63178439(+)
ENSMUSG00000031112	Stk26	chrX	+	50884577	50885697	50885588	50885697	50879488	50879545	2091	1188527	964707410	3111282	3411456797	300	150	0.134707	0.622527	0.058,0.057,0.032	0.043,0.037,0.049	0.006	chrX:50879545-50884578(+)	chrX:50879545-50885589(+)
ENSMUSG00000027378	Nphp1	chr2	-	127766023	127766121	127766023	127766118	127768170	127768258	2095	371615	382716	144230	173629	153	150	0.375191	1	0.488,0.367,0.479	0.447,0.534,0.504	-0.05	chr2:127766121-127768171(-)	chr2:127766118-127768171(-)
ENSMUSG00000016181	Diexf	chr1	-	193113756	193114002	193113756	193113980	193114604	193114717	2096	21920783	333811	75334174	254519	172	150	0.92663	1	0.853,0.826,0.868	0.723,0.866,0.889	0.023	chr1:193114002-193114605(-)	chr1:193113980-193114605(-)
ENSMUSG00000004393	Ddx56	chr11	-	6266810	6266971	6266810	6266917	6267417	6267579	2103	557371176	14131	155893471	22512	204	150	0.895688	1	0.967,0.955,0.992	0.983,0.963,0.967	0	chr11:6266971-6267418(-)	chr11:6266917-6267418(-)
ENSMUSG00000026626	Ppp2r5a	chr1	-	191358924	191359079	191358924	191359055	191362248	191362341	2105	515122	1435896562	207143	49022141249	174	150	0.144505	0.650771	0.03,0.047,0.033	0.034,0.027,0.029	0.007	chr1:191359079-191362249(-)	chr1:191359055-191362249(-)
ENSMUSG00000030142	Clec4e	chr6	-	123286207	123286518	123286207	123286359	123288893	123288989	2108	24417182	524	43291184	497	300	150	0.104466	0.548505	0.961,0.977,0.911	0.843,0.942,0.929	0.045	chr6:123286518-123288894(-)	chr6:123286359-123288894(-)
ENSMUSG00000046432	Bex3	chrX	+	136271262	136271978	136271267	136271978	136270809	136270882	2109	817716302	323220	2851148758	95036	155	150	0.710901	1	0.961,0.956,0.936	0.968,0.957,0.953	-0.008	chrX:136270882-136271263(+)	chrX:136270882-136271268(+)
ENSMUSG00000021178	Psmc1	chr12	+	100115419	100115605	100115468	100115605	100114837	100114962	2111	23431595851	340	77432231964	242	199	150	1	1	0.998,0.997,1.0	0.997,0.998,0.999	0	chr12:100114962-100115420(+)	chr12:100114962-100115469(+)
ENSMUSG00000001280	Sp1	chr15	+	102408215	102409719	102409157	102409719	102407771	102407932	2112	14521085514	30	47819841020	168	300	150	1	1	1.0,0.995,1.0	0.996,0.994,0.985	0.007	chr15:102407932-102408216(+)	chr15:102407932-102409158(+)
ENSMUSG00000043923	Ccdc84	chr9	-	44412916	44413043	44412916	44413022	44413136	44413201	2113	31259	997254	84321	3413768	171	150	0.817958	1	0.215,0.233,0.128	0.171,0.216,0.213	-0.008	chr9:44413043-44413137(-)	chr9:44413022-44413137(-)
ENSMUSG00000058267	Mrps14	chr1	+	160196920	160197104	160196945	160197104	160195214	160195311	2118	447022	402281147	156246	180773468	175	150	9.56132e-05	0.00626813	0.086,0.176,0.114	0.067,0.064,0.078	0.056	chr1:160195311-160196921(+)	chr1:160195311-160196946(+)
ENSMUSG00000033434	Gtpbp6	chr5	-	110106652	110106783	110106652	110106742	110106869	110106940	2119	1006146	20	34129101	60	191	150	0.59417	1	1.0,0.96,1.0	1.0,0.944,1.0	0.005	chr5:110106783-110106870(-)	chr5:110106742-110106870(-)
ENSMUSG00000036155	Mgat5	chr1	+	127306633	127307016	127306636	127307016	127249789	127249839	2120	518468225	18312957	167630311	39203115	153	150	0.64872	1	0.735,0.781,0.795	0.808,0.753,0.726	0.008	chr1:127249839-127306634(+)	chr1:127249839-127306637(+)
ENSMUSG00000038000	Acd	chr8	-	105700003	105700160	105700003	105700048	105700281	105700358	2121	1206431	20317395	3213798	53401212	262	150	0.792066	1	0.253,0.175,0.157	0.257,0.164,0.209	-0.015	chr8:105700160-105700282(-)	chr8:105700048-105700282(-)
ENSMUSG00000028758	Kif17	chr4	+	138277795	138278248	138278071	138278248	138274966	138275156	2124	18012066	1120	52198105	113	300	150	0.763028	1	0.891,0.968,1.0	1.0,0.9,0.946	0.004	chr4:138275156-138277796(+)	chr4:138275156-138278072(+)
ENSMUSG00000028758	Kif17	chr4	+	138289237	138289324	138289240	138289324	138287928	138288485	2126	3101	171110	4194	1146	153	150	0.0150911	0.176216	0.147,0.471,0.089	0.797,0.571,0.395	-0.352	chr4:138288485-138289238(+)	chr4:138288485-138289241(+)
ENSMUSG00000038374	Rbm8a	chr3	+	96630476	96630554	96630479	96630554	96630301	96630361	2130	557389233	680426189	201806524	235924580	153	150	0.459253	1	0.445,0.472,0.547	0.456,0.461,0.47	0.026	chr3:96630361-96630477(+)	chr3:96630361-96630480(+)
ENSMUSG00000026201	Stk16	chr1	+	75213112	75213228	75213132	75213228	75212885	75213006	2133	13610133	774546297	5919196	2821213586	170	150	0.729163	1	0.134,0.14,0.089	0.156,0.122,0.126	-0.014	chr1:75213006-75213113(+)	chr1:75213006-75213133(+)
ENSMUSG00000025949	Pikfyve	chr1	+	65192530	65192566	65192533	65192566	65192144	65192294	2134	25126	10121	5237	59	153	150	0.4838	1	0.71,0.495,0.855	1.0,0.819,0.433	-0.064	chr1:65192294-65192531(+)	chr1:65192294-65192534(+)
ENSMUSG00000027478	Dnmt3b	chr2	+	153675725	153675813	153675728	153675813	153674857	153675044	2139	997029	826629	4113097	3610563	153	150	0.309465	0.950384	0.542,0.51,0.495	0.528,0.548,0.602	-0.044	chr2:153675044-153675726(+)	chr2:153675044-153675729(+)
ENSMUSG00000047798	Cd300lf	chr11	-	115124247	115124377	115124247	115124356	115126110	115126452	2144	553421	241314	2310239	194928	171	150	0.276645	0.897191	0.668,0.696,0.568	0.515,0.646,0.55	0.074	chr11:115124377-115126111(-)	chr11:115124356-115126111(-)
ENSMUSG00000063253	Scoc	chr8	-	83437552	83437636	83437552	83437633	83437984	83438056	2145	213209119	24107	92345224	21722	153	150	0.433842	1	0.897,0.953,0.943	0.978,0.952,0.909	-0.015	chr8:83437636-83437985(-)	chr8:83437633-83437985(-)
ENSMUSG00000026104	Stat1	chr1	+	52147882	52147999	52147900	52147999	52147293	52147377	2147	211	386241142	730	134668316	168	150	0.887602	1	0.005,0.004,0.006	0.045,0.004,0.0	-0.011	chr1:52147377-52147883(+)	chr1:52147377-52147901(+)
ENSMUSG00000085795	Zfp703	chr8	+	26978234	26978395	26978261	26978395	26977324	26977611	2149	17207	501	43620	732	177	150	0.227194	0.825078	0.742,1.0,0.856	0.326,0.91,0.894	0.156	chr8:26977611-26978235(+)	chr8:26977611-26978262(+)
ENSMUSG00000027247	Arhgap1	chr2	+	91654045	91654207	91654072	91654207	91651763	91651823	2154	644521	415303194	337474	152577347	177	150	0.167023	0.71167	0.116,0.112,0.084	0.155,0.098,0.153	-0.031	chr2:91651823-91654046(+)	chr2:91651823-91654073(+)
ENSMUSG00000034903	Cobll1	chr2	-	65097632	65099392	65097632	65099389	65102068	65102166	2156	202813	601	83520	273	153	150	0.24159	0.847866	0.766,1.0,0.927	0.797,0.831,0.867	0.066	chr2:65099392-65102069(-)	chr2:65099389-65102069(-)
ENSMUSG00000034903	Cobll1	chr2	-	65150978	65151167	65150978	65151164	65238362	65238626	2157	651	122	1112	2	153	150	0.0229541	0.22653	0.855,0.71,0.329	1.0,1.0,0.495	-0.2	chr2:65151167-65238363(-)	chr2:65151164-65238363(-)
ENSMUSG00000008035	Mid1ip1	chrX	+	10717983	10719690	10717986	10719690	10717389	10717704	2158	16911163	447288205	57289151	162754404	153	150	0.77478	1	0.27,0.274,0.232	0.256,0.273,0.268	-0.007	chrX:10717704-10717984(+)	chrX:10717704-10717987(+)
ENSMUSG00000034327	Kctd9	chr14	+	67729223	67729409	67729350	67729409	67728649	67728746	2159	596924	24413997	219049	64346204	277	150	0.254568	0.869205	0.116,0.212,0.118	0.151,0.123,0.115	0.019	chr14:67728746-67729224(+)	chr14:67728746-67729351(+)
ENSMUSG00000027714	Exosc9	chr3	+	36553805	36554142	36554039	36554142	36553034	36553129	2161	568409221	0	210779520	10	300	150	1	1	1.0,1.0,1.0	1.0,0.997,1.0	0.001	chr3:36553129-36553806(+)	chr3:36553129-36554040(+)
ENSMUSG00000032086	Bace1	chr9	+	45856087	45856225	45856162	45856225	45854626	45854843	2164	732576273	301	2791009578	123	225	150	1	1	0.994,1.0,0.995	0.995,0.997,0.992	0.002	chr9:45854843-45856088(+)	chr9:45854843-45856163(+)
ENSMUSG00000023118	Sympk	chr7	+	19047449	19047610	19047520	19047610	19046754	19046902	2166	11861036423	400	4561769927	123	221	150	1	1	0.995,1.0,1.0	0.997,0.998,0.995	0.002	chr7:19046902-19047450(+)	chr7:19046902-19047521(+)
ENSMUSG00000030616	Sytl2	chr7	+	90360044	90360177	90360125	90360177	90358132	90358284	2167	421	0	12	30	231	150	1	1	1.0,1.0,1.0	NA,0.178,1.0	0.411	chr7:90358284-90360045(+)	chr7:90358284-90360126(+)
ENSMUSG00000037370	Enpp1	chr10	-	24651244	24651399	24651244	24651396	24652834	24652886	2168	250	443913	53	146938	153	150	1	1	0.043,0.112,0.0	0.0,0.066,0.072	0.006	chr10:24651399-24652835(-)	chr10:24651396-24652835(-)
ENSMUSG00000037370	Enpp1	chr10	-	24664554	24664627	24664554	24664601	24664910	24664976	2169	413522	520	194426	69	176	150	0.0637973	0.412591	0.875,0.937,1.0	1.0,0.862,0.711	0.08	chr10:24664627-24664911(-)	chr10:24664601-24664911(-)
ENSMUSG00000017664	Slc35c2	chr2	-	165280785	165280954	165280785	165280891	165281307	165281380	2170	825554349	2487	3001348647	5228	213	150	0.133157	0.618545	0.96,0.98,0.972	0.977,0.977,0.983	-0.008	chr2:165280954-165281308(-)	chr2:165280891-165281308(-)
ENSMUSG00000017664	Slc35c2	chr2	-	165282782	165282933	165282782	165282862	165283248	165283600	2171	1281795449	281513	3811784994	72711	221	150	0.0423814	0.330201	0.969,0.973,0.959	0.974,0.978,0.984	-0.012	chr2:165282933-165283249(-)	chr2:165282862-165283249(-)
ENSMUSG00000017664	Slc35c2	chr2	-	165283248	165283600	165283248	165283535	165287683	165287755	2174	306143115	240	100469268	32	215	150	0.790487	1	0.991,0.961,1.0	1.0,0.991,0.989	-0.009	chr2:165283600-165287684(-)	chr2:165283535-165287684(-)
ENSMUSG00000022387	Brd1	chr15	-	88700772	88701270	88700772	88700877	88707033	88707294	2175	650594262	1279452	214734484	5922079	300	150	0.0649785	0.416461	0.719,0.76,0.716	0.645,0.625,0.754	0.057	chr15:88701270-88707034(-)	chr15:88700877-88707034(-)
ENSMUSG00000035062	Zc4h2	chrX	-	95642163	95642358	95642163	95642326	95643307	95643480	2176	1	724916	2	308860	182	150	1	1	0.0,0.0,0.049	0.0,0.0,0.027	0.007	chrX:95642358-95643308(-)	chrX:95642326-95643308(-)
ENSMUSG00000061136	Prpf40a	chr2	-	53188447	53188540	53188447	53188527	53189968	53190100	2178	352	1052	483	22311	163	150	0.814397	1	0.216,0.479,0.479	0.648,0.242,0.201	0.028	chr2:53188540-53189969(-)	chr2:53188527-53189969(-)
ENSMUSG00000038375	Trp53inp2	chr2	+	155385880	155386169	155386000	155386169	155385289	155385464	2180	1736667	1256	65235136	2254	270	150	0.896362	1	0.889,0.88,0.861	0.948,0.839,0.95	-0.036	chr2:155385464-155385881(+)	chr2:155385464-155386001(+)
ENSMUSG00000058835	Abi1	chr2	-	22953434	22953611	22953434	22953608	22957017	22957118	2183	24314598	23815088	84344166	91319222	153	150	0.381289	1	0.5,0.487,0.522	0.475,0.514,0.423	0.032	chr2:22953611-22957018(-)	chr2:22953608-22957018(-)
ENSMUSG00000031065	Cdk16	chrX	+	20693906	20694171	20694037	20694171	20693323	20693531	2184	13912262	498406241	2910663	188787448	281	150	8.09597e-08	3.71524e-05	0.13,0.138,0.121	0.076,0.067,0.07	0.059	chrX:20693531-20693907(+)	chrX:20693531-20694038(+)
ENSMUSG00000022248	Rad1	chr15	+	10492764	10492863	10492787	10492863	10490255	10490514	2185	429338166	1533	137515350	21212	173	150	0.596823	1	0.961,0.99,0.98	0.983,0.974,0.962	0.004	chr15:10490514-10492765(+)	chr15:10490514-10492788(+)
ENSMUSG00000028676	Srsf10	chr4	+	135863522	135863576	135863525	135863576	135863039	135863202	2197	13011070545	395339160	50520551253	175656377	153	150	0.645174	1	0.764,0.756,0.77	0.739,0.754,0.765	0.011	chr4:135863202-135863523(+)	chr4:135863202-135863526(+)
ENSMUSG00000074358	Ccdc61	chr7	-	18892038	18892199	18892038	18892099	18892273	18892352	2202	383510	605331	165331	209560	250	150	0.907295	1	0.275,0.284,0.162	0.324,0.251,0.237	-0.03	chr7:18892199-18892274(-)	chr7:18892099-18892274(-)
ENSMUSG00000074358	Ccdc61	chr7	-	18899557	18899713	18899557	18899682	18900918	18901076	2203	13812754	4100	4620299	3122	181	150	0.7867	1	0.966,0.913,1.0	0.927,0.933,0.976	0.014	chr7:18899713-18900919(-)	chr7:18899682-18900919(-)
ENSMUSG00000032855	Pkd1	chr17	+	24591014	24591217	24591174	24591217	24590818	24590937	2204	20417687	20	49251139	120	300	150	1	1	1.0,0.978,1.0	0.961,0.984,1.0	0.011	chr17:24590937-24591015(+)	chr17:24590937-24591175(+)
ENSMUSG00000028049	Scamp3	chr3	+	89179091	89179223	89179094	89179223	89177989	89178067	2205	415275182	502335165	119583329	143643421	153	150	0.61157	1	0.448,0.446,0.52	0.449,0.471,0.434	0.02	chr3:89178067-89179092(+)	chr3:89178067-89179095(+)
ENSMUSG00000028049	Scamp3	chr3	+	89180038	89180380	89180251	89180380	89179316	89179437	2206	1349028	895722318	2115791	3171438740	300	150	0.158084	0.688932	0.07,0.059,0.042	0.032,0.052,0.058	0.01	chr3:89179437-89180039(+)	chr3:89179437-89180252(+)
ENSMUSG00000035165	Kcne3	chr7	+	100182681	100182823	100182732	100182823	100181135	100181274	2210	1390	1296	144	1711	201	150	0.541838	1	0.447,0.427,0.0	0.427,0.299,0.213	-0.022	chr7:100181274-100182682(+)	chr7:100181274-100182733(+)
ENSMUSG00000000902	Smarcb1	chr10	-	75897444	75897605	75897444	75897576	75904383	75904574	2211	433425	795491241	104749	269831588	179	150	0.598431	1	0.043,0.055,0.08	0.03,0.045,0.065	0.013	chr10:75897605-75904384(-)	chr10:75897576-75904384(-)
ENSMUSG00000055491	Pprc1	chr19	+	46062140	46062290	46062143	46062290	46061402	46061576	2215	966541	313248120	3514465	93435196	153	150	0.347019	0.999666	0.231,0.204,0.251	0.27,0.245,0.245	-0.025	chr19:46061576-46062141(+)	chr19:46061576-46062144(+)
ENSMUSG00000055491	Pprc1	chr19	+	46068017	46068088	46068020	46068088	46067228	46067286	2217	25217792	269166103	105367221	81368212	153	150	0.393739	1	0.479,0.511,0.467	0.56,0.494,0.505	-0.034	chr19:46067286-46068018(+)	chr19:46067286-46068021(+)
ENSMUSG00000004508	Gab2	chr7	+	97303023	97303129	97303026	97303129	97302368	97302459	2219	20818369	583726	82267136	188139	153	150	0.772727	1	0.779,0.829,0.722	0.817,0.764,0.774	-0.008	chr7:97302459-97303024(+)	chr7:97302459-97303027(+)
ENSMUSG00000028057	Rit1	chr3	+	88717572	88717658	88717601	88717658	88717325	88717470	2220	261513	18512865	125933	54248163	179	150	0.0226502	0.224982	0.105,0.089,0.144	0.157,0.166,0.145	-0.043	chr3:88717470-88717573(+)	chr3:88717470-88717602(+)
ENSMUSG00000030780	BC017158	chr7	-	128274632	128274723	128274632	128274703	128276085	128276143	2225	10145	19315375	62817	60309140	170	150	0.109037	0.562036	0.044,0.075,0.056	0.081,0.074,0.097	-0.026	chr7:128274723-128276086(-)	chr7:128274703-128276086(-)
ENSMUSG00000079550	Mpp4	chr1	-	59124630	59125200	59124630	59124739	59125522	59125616	2229	100	231	20	13	300	150	1	1	0.2,0.0,0.0	NA,0.5,0.0	-0.183	chr1:59125200-59125523(-)	chr1:59124739-59125523(-)
ENSMUSG00000026135	Zfp142	chr1	-	74579324	74579618	74579324	74579449	74585383	74585697	2231	666650	400	3112246	0	300	150	0.673821	1	0.892,1.0,1.0	1.0,1.0,1.0	-0.036	chr1:74579618-74585384(-)	chr1:74579449-74585384(-)
ENSMUSG00000026135	Zfp142	chr1	-	74579324	74579927	74579324	74579449	74585383	74585697	2232	708054	400	3513358	0	300	150	0.632505	1	0.897,1.0,1.0	1.0,1.0,1.0	-0.034	chr1:74579927-74585384(-)	chr1:74579449-74585384(-)
ENSMUSG00000026135	Zfp142	chr1	-	74579324	74579927	74579324	74579618	74585383	74585697	2233	737431	712	259040	373	300	150	0.352943	1	0.839,0.974,0.886	0.806,0.865,0.87	0.053	chr1:74579927-74585384(-)	chr1:74579618-74585384(-)
ENSMUSG00000025939	Ube2w	chr1	-	16585275	16585431	16585275	16585352	16597950	16598053	2237	823572231	30157	2661051574	198221	229	150	0.000175569	0.00926074	0.947,0.962,0.956	0.902,0.894,0.947	0.041	chr1:16585431-16597951(-)	chr1:16585352-16597951(-)
ENSMUSG00000026384	Ptpn4	chr1	-	119773048	119773146	119773048	119773127	119773228	119773271	2239	7135	624223	1128	219851	169	150	0.153856	0.676939	0.091,0.216,0.162	0.041,0.098,0.122	0.069	chr1:119773146-119773229(-)	chr1:119773127-119773229(-)
ENSMUSG00000031278	Acsl4	chrX	-	142351378	142351618	142351378	142351615	142360386	142360436	2242	17715266	533323	6129196	186034	153	150	0.725028	1	0.766,0.819,0.738	0.769,0.826,0.735	-0.002	chrX:142351618-142360387(-)	chrX:142351615-142360387(-)
ENSMUSG00000031278	Acsl4	chrX	-	142351378	142351908	142351378	142351615	142360386	142360436	2243	11210840	533323	49243111	186034	300	150	0.0555118	0.38365	0.514,0.621,0.465	0.576,0.669,0.62	-0.088	chrX:142351908-142360387(-)	chrX:142351615-142360387(-)
ENSMUSG00000031278	Acsl4	chrX	-	142351378	142351908	142351378	142351618	142360386	142360436	2244	969632	15914058	42214105	5425987	300	150	0.0104417	0.143894	0.232,0.255,0.216	0.28,0.292,0.376	-0.082	chrX:142351908-142360387(-)	chrX:142351618-142360387(-)
ENSMUSG00000026835	Fcnb	chr2	-	28080585	28080642	28080585	28080621	28080895	28080949	2245	1806669	395621711812	80282145	233978414224	171	150	0.412911	1	0.038,0.026,0.032	0.029,0.031,0.029	0.002	chr2:28080642-28080896(-)	chr2:28080621-28080896(-)
ENSMUSG00000073139	Tmem185a	chrX	-	70467153	70467361	70467153	70467356	70470117	70470294	2249	18813565	9101	62267156	243	155	150	0.00664898	0.108584	0.953,0.929,0.984	0.968,0.985,0.981	-0.023	chrX:70467361-70470118(-)	chrX:70467356-70470118(-)
ENSMUSG00000012535	Tnpo3	chr6	-	29554794	29554980	29554794	29554962	29555152	29555309	2255	30227	661430195	43320	184838522	168	150	0.296037	0.929043	0.039,0.044,0.031	0.019,0.034,0.033	0.009	chr6:29554980-29555153(-)	chr6:29554962-29555153(-)
ENSMUSG00000020773	Trim47	chr11	-	116106931	116107006	116106931	116107003	116107423	116107622	2256	7111	15253	815	22219	153	150	0.938277	1	0.314,0.301,0.246	0.0,0.263,0.436	0.054	chr11:116107006-116107424(-)	chr11:116107003-116107424(-)
ENSMUSG00000060679	Mrps9	chr1	+	42899352	42899549	42899440	42899549	42898439	42898608	2258	223414	599499205	93515	233749440	238	150	0.169901	0.717592	0.023,0.041,0.041	0.024,0.029,0.021	0.01	chr1:42898608-42899353(+)	chr1:42898608-42899441(+)
ENSMUSG00000068036	Afdn	chr17	+	13807276	13807392	13807279	13807392	13803938	13804134	2259	30244	14105	6229	31319	153	150	0.253687	0.868783	0.678,0.702,0.44	0.662,0.624,0.317	0.072	chr17:13804134-13807277(+)	chr17:13804134-13807280(+)
ENSMUSG00000068036	Afdn	chr17	+	13808931	13809095	13808934	13809095	13807276	13807392	2260	11134	342	3148	2113	153	150	0.149545	0.666923	0.782,0.761,0.662	0.595,0.555,0.723	0.111	chr17:13807392-13808932(+)	chr17:13807392-13808935(+)
ENSMUSG00000015095	Fbxw5	chr2	+	25502856	25503045	25502870	25503045	25502400	25502558	2262	503412	334240118	155030	102545289	164	150	0.110464	0.56697	0.12,0.115,0.085	0.119,0.077,0.087	0.012	chr2:25502558-25502857(+)	chr2:25502558-25502871(+)
ENSMUSG00000029472	Anapc5	chr5	-	122788301	122788464	122788301	122788440	122791607	122791755	2265	392627251404	0	127355533084	270	174	150	1	1	1.0,1.0,1.0	0.998,0.999,1.0	0.001	chr5:122788464-122791608(-)	chr5:122788440-122791608(-)
ENSMUSG00000029472	Anapc5	chr5	-	122791607	122791755	122791607	122791735	122791826	122791934	2266	290920221097	858938	94339642367	37178109	170	150	0.0770924	0.460647	0.968,0.952,0.962	0.957,0.952,0.95	0.008	chr5:122791755-122791827(-)	chr5:122791735-122791827(-)
ENSMUSG00000029472	Anapc5	chr5	-	122800450	122800608	122800450	122800593	122802129	122802219	2267	418297177	820610301	155516347	3501553902	165	150	0.00120273	0.0356086	0.317,0.307,0.348	0.287,0.232,0.259	0.065	chr5:122800608-122802130(-)	chr5:122800593-122802130(-)
ENSMUSG00000029472	Anapc5	chr5	-	122800450	122800632	122800450	122800593	122802129	122802219	2268	304921501070	820610301	83534762307	3501553902	189	150	5.44759e-06	0.000862034	0.747,0.737,0.738	0.654,0.64,0.67	0.086	chr5:122800632-122802130(-)	chr5:122800593-122802130(-)
ENSMUSG00000029472	Anapc5	chr5	-	122800450	122800632	122800450	122800608	122802129	122802219	2269	27051893931	744038	71231152049	3215389	174	150	0.000147516	0.00815602	0.969,0.976,0.955	0.95,0.946,0.952	0.017	chr5:122800632-122802130(-)	chr5:122800608-122802130(-)
ENSMUSG00000028911	Srsf4	chr4	+	131886106	131886304	131886130	131886304	131885308	131885492	2274	36165	1127453	82512	4618781	174	150	0.0718375	0.4425	0.217,0.157,0.075	0.13,0.103,0.113	0.034	chr4:131885492-131886107(+)	chr4:131885492-131886131(+)
ENSMUSG00000037509	Arhgef4	chr1	+	34807023	34807291	34807058	34807291	34806314	34806494	2275	603	444318	84	146329	185	150	0.483148	1	0.1,0.0,0.119	0.0,0.093,0.101	0.008	chr1:34806494-34807024(+)	chr1:34806494-34807059(+)
ENSMUSG00000078350	Smim1	chr4	-	154023687	154023887	154023687	154023817	154025503	154025621	2279	20202	13204	153528	151922	220	150	0.515238	1	0.512,0.405,0.254	0.405,0.557,0.465	-0.085	chr4:154023887-154025504(-)	chr4:154023817-154025504(-)
ENSMUSG00000078350	Smim1	chr4	-	154023687	154023891	154023687	154023817	154025503	154025621	2280	416414	13204	3482100	151922	224	150	0.625835	1	0.679,0.682,0.701	0.603,0.743,0.753	-0.012	chr4:154023891-154025504(-)	chr4:154023817-154025504(-)
ENSMUSG00000078350	Smim1	chr4	-	154023687	154023891	154023687	154023887	154025503	154025621	2281	274613	621	195380	68	154	150	0.866369	1	0.814,0.957,0.927	1.0,0.896,0.907	-0.035	chr4:154023891-154025504(-)	chr4:154023887-154025504(-)
ENSMUSG00000024805	Pcgf5	chr19	+	36437302	36437362	36437305	36437362	36437154	36437210	2283	867580367	25279	2561243630	163316	153	150	0.747734	1	0.971,0.955,0.976	0.94,0.974,0.975	0.004	chr19:36437210-36437303(+)	chr19:36437210-36437306(+)
ENSMUSG00000031667	Aktip	chr8	-	91129599	91129843	91129599	91129805	91131040	91131152	2284	763	1316321	61	32141106	188	150	0.00703474	0.111154	0.041,0.071,0.102	0.0,0.033,0.007	0.058	chr8:91129843-91131041(-)	chr8:91129805-91131041(-)
ENSMUSG00000025993	Slc40a1	chr1	-	45925220	45925365	45925220	45925327	45926423	45926519	2287	1508266	33366	70234163	172839	188	150	0.405396	1	0.784,0.645,0.898	0.767,0.87,0.769	-0.026	chr1:45925365-45926424(-)	chr1:45925327-45926424(-)
ENSMUSG00000025993	Slc40a1	chr1	-	45925220	45925408	45925220	45925327	45926423	45926519	2288	348200151	33366	153577358	172839	231	150	0.235294	0.838592	0.873,0.783,0.942	0.854,0.93,0.856	-0.014	chr1:45925408-45926424(-)	chr1:45925327-45926424(-)
ENSMUSG00000022783	Spag6l	chr16	-	16829019	16829143	16829019	16829115	16829194	16829313	2290	160	420	283	23	178	150	1	1	0.174,0.717,NA	1.0,0.771,0.457	-0.297	chr16:16829143-16829195(-)	chr16:16829115-16829195(-)
ENSMUSG00000000318	Clec10a	chr11	+	70168582	70168696	70168585	70168696	70167816	70168004	2292	392014	592725	54911	125527	153	150	0.810972	1	0.393,0.421,0.354	0.29,0.466,0.285	0.042	chr11:70168004-70168583(+)	chr11:70168004-70168586(+)
ENSMUSG00000027291	Vps39	chr2	-	120325385	120325741	120325385	120325527	120326005	120326149	2296	243012	28520796	82613	80352203	300	150	0.0482189	0.353477	0.04,0.068,0.059	0.048,0.036,0.031	0.017	chr2:120325741-120326006(-)	chr2:120325527-120326006(-)
ENSMUSG00000063884	Ptcd3	chr6	-	71883443	71883602	71883443	71883592	71884539	71884625	2297	393315	632461278	135535	230961526	160	150	0.798274	1	0.055,0.063,0.048	0.05,0.051,0.059	0.002	chr6:71883602-71884540(-)	chr6:71883592-71884540(-)
ENSMUSG00000027365	Trpm7	chr2	-	126805016	126805087	126805016	126805084	126807288	126807379	2303	375239117	854730	97433210	3210653	153	150	0.260556	0.875867	0.812,0.833,0.793	0.748,0.8,0.795	0.032	chr2:126805087-126807289(-)	chr2:126805084-126807289(-)
ENSMUSG00000002107	Celf2	chr2	-	6539704	6546779	6539704	6545675	6547041	6547213	2304	895655364	804570274	2571155583	2551137619	300	150	0.0603697	0.400921	0.358,0.365,0.399	0.335,0.337,0.32	0.043	chr2:6546779-6547042(-)	chr2:6545675-6547042(-)
ENSMUSG00000002107	Celf2	chr2	-	6553784	6553982	6553784	6553964	6560670	6560790	2307	262613	376313138	183713	129560242	168	150	0.774076	1	0.058,0.069,0.078	0.111,0.056,0.046	-0.003	chr2:6553982-6560671(-)	chr2:6553964-6560671(-)
ENSMUSG00000068735	Trp53i11	chr2	+	93197608	93197748	93197611	93197748	93196896	93196978	2312	2055	37197	8242	174634	153	150	0.336508	0.991167	0.346,0.205,0.412	0.316,0.338,0.055	0.085	chr2:93196978-93197609(+)	chr2:93196978-93197612(+)
ENSMUSG00000055436	Srsf11	chr3	-	158012779	158012896	158012779	158012875	158013951	158014041	2314	20114870	1114815409	50245124	3321456879	171	150	0.210287	0.793589	0.137,0.137,0.131	0.117,0.129,0.11	0.016	chr3:158012896-158013952(-)	chr3:158012875-158013952(-)
ENSMUSG00000031907	Zfp90	chr8	+	106418996	106419197	106419070	106419197	106415338	106415770	2317	11152	412913	61711	177039	224	150	0.625859	1	0.152,0.257,0.093	0.191,0.14,0.159	0.004	chr8:106415770-106418997(+)	chr8:106415770-106419071(+)
ENSMUSG00000031907	Zfp90	chr8	+	106419420	106419610	106419514	106419610	106419070	106419197	2318	19144	563921	63114	105122	244	150	0.0143776	0.171374	0.173,0.181,0.105	0.269,0.272,0.281	-0.121	chr8:106419197-106419421(+)	chr8:106419197-106419515(+)
ENSMUSG00000027072	Prg3	chr2	+	84988658	84988792	84988719	84988792	84988214	84988301	2321	763351442	916	3561549578	393	211	150	0.689994	1	0.984,0.996,0.981	0.988,0.992,0.993	-0.004	chr2:84988301-84988659(+)	chr2:84988301-84988720(+)
ENSMUSG00000030325	Klrb1c	chr6	-	128784104	128784259	128784104	128784250	128784736	128784811	2326	1021	30	910	0	159	150	1	1	1.0,0.386,1.0	NA,1.0,1.0	-0.205	chr6:128784259-128784737(-)	chr6:128784250-128784737(-)
ENSMUSG00000029020	Mfn2	chr4	-	147887205	147887348	147887205	147887313	147887414	147887523	2328	544	383342153	21611	150603320	185	150	0.0488244	0.355643	0.01,0.009,0.021	0.011,0.021,0.027	-0.006	chr4:147887348-147887415(-)	chr4:147887313-147887415(-)
ENSMUSG00000026116	Tmem131	chr1	-	36816108	36816262	36816108	36816247	36818657	36818775	2330	132410	430410158	71015	151498339	165	150	0.121227	0.590336	0.027,0.051,0.054	0.04,0.018,0.039	0.012	chr1:36816262-36818658(-)	chr1:36816247-36818658(-)
ENSMUSG00000070953	Rabepk	chr2	-	34785566	34785728	34785566	34785725	34790502	34790655	2333	292219107	52377	107406228	137439	153	150	0.520017	1	0.846,0.853,0.937	0.89,0.843,0.851	0.017	chr2:34785728-34790503(-)	chr2:34785725-34790503(-)
ENSMUSG00000026455	Klhl12	chr1	+	134458427	134458666	134458465	134458666	134455530	134455665	2334	1255	666132	49	199348	188	150	0.127925	0.608341	0.127,0.061,0.111	0.0,0.033,0.13	0.045	chr1:134455665-134458428(+)	chr1:134455665-134458466(+)
ENSMUSG00000026455	Klhl12	chr1	+	134488934	134489121	134489015	134489121	134487643	134487742	2335	25823889	251	83315208	146	231	150	0.467932	1	0.988,0.969,0.983	0.982,0.981,0.957	0.007	chr1:134487742-134488935(+)	chr1:134487742-134489016(+)
ENSMUSG00000054199	Gon4l	chr3	+	88854601	88854795	88854604	88854795	88846387	88846579	2337	340303133	244	2390195	42	153	150	0.788213	1	0.994,0.987,0.97	1.0,0.99,0.99	-0.01	chr3:88846579-88854602(+)	chr3:88846579-88854605(+)
ENSMUSG00000033257	Ttll4	chr1	+	74678897	74680463	74680353	74680463	74672843	74673010	2339	300295132	200	110500256	160	300	150	0.658374	1	0.987,1.0,1.0	0.982,0.977,1.0	0.009	chr1:74673010-74678898(+)	chr1:74673010-74680354(+)
ENSMUSG00000019996	Map7	chr10	+	20261834	20261983	20261858	20261983	20257183	20257297	2340	11168	16216545	185	61177166	174	150	0.0585353	0.394447	0.055,0.077,0.133	0.0,0.081,0.025	0.053	chr10:20257297-20261835(+)	chr10:20257297-20261859(+)
ENSMUSG00000043015	Nemp2	chr1	+	52643121	52643236	52643167	52643236	52642318	52642412	2341	904530	34225	448653	44325	196	150	0.863026	1	0.67,0.61,0.821	0.894,0.605,0.619	-0.006	chr1:52642412-52643122(+)	chr1:52642412-52643168(+)
ENSMUSG00000041977	Arhgef11	chr3	+	87710650	87711542	87711499	87711542	87709563	87709662	2344	770	914625	41	299854	300	150	0.0107692	0.144927	0.037,0.071,0.0	0.0,0.02,0.009	0.026	chr3:87709662-87710651(+)	chr3:87709662-87711500(+)
ENSMUSG00000041977	Arhgef11	chr3	+	87717420	87717520	87717423	87717520	87717029	87717174	2345	595029	443020	229056	207443	153	150	0.34337	0.995809	0.568,0.62,0.587	0.519,0.544,0.561	0.05	chr3:87717174-87717421(+)	chr3:87717174-87717424(+)
ENSMUSG00000002105	Slc39a13	chr2	-	91065581	91065714	91065581	91065700	91066012	91066126	2346	223	454214	106	119730	164	150	0.162282	0.699918	0.039,0.042,0.164	0.0,0.086,0.155	0.001	chr2:91065714-91066013(-)	chr2:91065700-91066013(-)
ENSMUSG00000002105	Slc39a13	chr2	-	91065581	91065739	91065581	91065700	91066012	91066126	2347	991	454214	82020	119730	189	150	0.0196626	0.205072	0.137,0.145,0.054	0.366,0.141,0.346	-0.172	chr2:91065739-91066013(-)	chr2:91065700-91066013(-)
ENSMUSG00000002105	Slc39a13	chr2	-	91065581	91065739	91065581	91065714	91066012	91066126	2348	971	203	81717	73	175	150	0.823134	1	0.794,1.0,0.222	1.0,0.675,0.829	-0.163	chr2:91065739-91066013(-)	chr2:91065714-91066013(-)
ENSMUSG00000042210	Abhd14a	chr9	-	106440620	106440910	106440620	106440856	106443826	106443942	2351	40338	20414088	138333	59277185	204	150	0.122624	0.596105	0.126,0.148,0.063	0.139,0.181,0.116	-0.033	chr9:106440910-106443827(-)	chr9:106440856-106443827(-)
ENSMUSG00000114515	Aldoa	chr7	-	126808095	126808294	126808095	126808236	126808869	126809108	2353	0	1162	36	11410	208	150	3.03021e-05	0.00291397	0.0,0.0,0.0	0.0,0.134,0.302	-0.145	chr7:126808294-126808870(-)	chr7:126808236-126808870(-)
ENSMUSG00000038271	Iffo1	chr6	+	125151794	125151803	125151797	125151803	125151384	125151525	2355	14014051	1502	4016671	215	153	150	0.129197	0.61034	0.901,1.0,0.962	0.951,0.994,0.933	-0.005	chr6:125151525-125151795(+)	chr6:125151525-125151798(+)
ENSMUSG00000038271	Iffo1	chr6	+	125151794	125152771	125152613	125152771	125151384	125151525	2357	23422772	162214	63272135	6536	300	150	0.684904	1	0.88,0.838,0.72	0.84,0.72,0.918	-0.013	chr6:125151525-125151795(+)	chr6:125151525-125152614(+)
ENSMUSG00000038271	Iffo1	chr6	+	125152443	125152771	125152613	125152771	125151384	125151525	2358	1019222	162214	2510968	6536	300	150	0.766302	1	0.759,0.676,0.44	0.676,0.507,0.85	-0.053	chr6:125151525-125152444(+)	chr6:125151525-125152614(+)
ENSMUSG00000038271	Iffo1	chr6	+	125153406	125153502	125153409	125153502	125153041	125153162	2360	1389268	836228	57197103	249453	153	150	0.301431	0.941638	0.62,0.593,0.704	0.7,0.673,0.656	-0.037	chr6:125153162-125153407(+)	chr6:125153162-125153410(+)
ENSMUSG00000040943	Tet2	chr3	-	133469275	133469767	133469275	133469639	133471339	133471477	2362	334114	315261116	152412	115374203	278	150	0.00661461	0.108409	0.054,0.078,0.061	0.066,0.033,0.031	0.021	chr3:133469767-133471340(-)	chr3:133469639-133471340(-)
ENSMUSG00000037628	Cdkn3	chr14	+	46769832	46769936	46769835	46769936	46768865	46768897	2363	323168145	642117	150540369	139752	153	150	0.787263	1	0.832,0.887,0.893	0.919,0.845,0.874	-0.009	chr14:46768897-46769833(+)	chr14:46768897-46769836(+)
ENSMUSG00000040225	Prrc2c	chr1	-	162723109	162723287	162723109	162723281	162724703	162724869	2371	12571135425	439356127	3631488882	102551264	156	150	0.986232	1	0.734,0.754,0.763	0.774,0.722,0.763	-0.003	chr1:162723287-162724704(-)	chr1:162723281-162724704(-)
ENSMUSG00000000731	Aire	chr10	-	78034585	78035833	78034585	78034707	78036684	78036784	2375	300	0	11	2	300	150	1	1	1.0,NA,NA	NA,1.0,0.2	0.4	chr10:78035833-78036685(-)	chr10:78034707-78036685(-)
ENSMUSG00000000731	Aire	chr10	-	78037872	78037988	78037872	78037985	78039661	78039742	2376	20	210	11	21	153	150	1	1	0.0,0.662,NA	NA,0.329,0.495	-0.081	chr10:78037988-78039662(-)	chr10:78037985-78039662(-)
ENSMUSG00000022106	Rcbtb2	chr14	+	73154314	73154408	73154319	73154408	73151532	73151615	2378	370296113	0	132570345	229	155	150	0.948825	1	1.0,1.0,1.0	0.985,0.996,0.974	0.015	chr14:73151615-73154315(+)	chr14:73151615-73154320(+)
ENSMUSG00000031209	Heph	chrX	+	96497847	96498056	96497973	96498056	96486226	96486358	2380	20	0	22	10	276	150	1	1	NA,1.0,NA	NA,0.521,1.0	0.24	chrX:96486358-96497848(+)	chrX:96486358-96497974(+)
ENSMUSG00000035027	Map2k2	chr10	+	81118976	81119160	81119108	81119160	81118151	81118229	2381	452121	1102804401	164720	4091450952	282	150	0.176899	0.729372	0.021,0.014,0.027	0.02,0.017,0.011	0.005	chr10:81118229-81118977(+)	chr10:81118229-81119109(+)
ENSMUSG00000035027	Map2k2	chr10	+	81121042	81121110	81121045	81121110	81119489	81119703	2382	357228150	690481248	131466241	2291034657	153	150	0.159837	0.693056	0.337,0.317,0.372	0.359,0.306,0.265	0.032	chr10:81119703-81121043(+)	chr10:81119703-81121046(+)
ENSMUSG00000037606	Osbpl5	chr7	-	143713495	143714008	143713495	143713578	143715665	143715822	2385	383123	131112	56124	93811	300	150	0.103359	0.547075	0.594,0.585,0.489	0.217,0.445,0.522	0.161	chr7:143714008-143715666(-)	chr7:143713578-143715666(-)
ENSMUSG00000003166	Dgcr2	chr16	-	17858359	17858579	17858359	17858570	17859403	17859526	2386	364238128	20318566	125417246	60324165	159	150	0.677407	1	0.628,0.548,0.647	0.663,0.548,0.584	0.009	chr16:17858579-17859404(-)	chr16:17858570-17859404(-)
ENSMUSG00000003166	Dgcr2	chr16	-	17859403	17859526	17859403	17859523	17872562	17872685	2388	680461239	222	189888480	240	153	150	1	1	0.997,0.996,0.992	0.989,0.995,1.0	0	chr16:17859526-17872563(-)	chr16:17859523-17872563(-)
ENSMUSG00000028064	Sema4a	chr3	-	88451344	88451467	88451344	88451450	88451687	88451786	2389	494024	935586460	168051	3071383627	167	150	0.465976	1	0.045,0.058,0.045	0.045,0.049,0.068	-0.005	chr3:88451467-88451688(-)	chr3:88451450-88451688(-)
ENSMUSG00000028064	Sema4a	chr3	-	88451344	88451497	88451344	88451450	88451687	88451786	2390	794834	935586460	2811152	3071383627	197	150	0.85069	1	0.06,0.059,0.053	0.065,0.058,0.059	-0.003	chr3:88451497-88451688(-)	chr3:88451450-88451688(-)
ENSMUSG00000028064	Sema4a	chr3	-	88451344	88451497	88451344	88451467	88451687	88451786	2391	563822	263012	227829	104728	180	150	0.656211	1	0.642,0.514,0.604	0.647,0.58,0.463	0.023	chr3:88451497-88451688(-)	chr3:88451467-88451688(-)
ENSMUSG00000059834	Sclt1	chr3	-	41671384	41671502	41671384	41671483	41675327	41675505	2393	920	1048131	21	53170105	169	150	0.00936042	0.135079	0.071,0.021,0.0	0.0,0.01,0.008	0.025	chr3:41671502-41675328(-)	chr3:41671483-41675328(-)
ENSMUSG00000059834	Sclt1	chr3	-	41730860	41730919	41730860	41730914	41734167	41734235	2394	17813163	10	48253121	260	155	150	0.818737	1	1.0,0.992,1.0	0.959,0.976,1.0	0.019	chr3:41730919-41734168(-)	chr3:41730914-41734168(-)
ENSMUSG00000029089	5730480H06Rik	chr5	+	48374372	48374538	48374383	48374538	48374179	48374247	2395	767	15914555	4711	50215151	161	150	0.919769	1	0.039,0.037,0.106	0.069,0.029,0.064	0.007	chr5:48374247-48374373(+)	chr5:48374247-48374384(+)
ENSMUSG00000033439	Trmt13	chr3	-	116582493	116582923	116582493	116582724	116585195	116585270	2400	16911932	37331	40228115	123425	300	150	0.872618	1	0.695,0.643,0.941	0.625,0.77,0.697	0.062	chr3:116582923-116585196(-)	chr3:116582724-116585196(-)
ENSMUSG00000033439	Trmt13	chr3	-	116588471	116588639	116588471	116588524	116589490	116589597	2402	20618455	754	69241134	4268	265	150	0.00329043	0.0665188	0.943,0.954,0.886	0.907,0.84,0.905	0.044	chr3:116588639-116589491(-)	chr3:116588524-116589491(-)
ENSMUSG00000004099	Dnmt1	chr9	-	20940475	20940554	20940475	20940551	20941372	20941583	2404	18121440683	15071271598	62825551368	50819981106	153	150	0.393766	1	0.541,0.526,0.528	0.548,0.556,0.548	-0.019	chr9:20940554-20941373(-)	chr9:20940551-20941373(-)
ENSMUSG00000038695	Josd2	chr7	+	44470858	44471307	44471112	44471307	44470411	44470537	2405	12811252	257241120	44228162	106477270	300	150	0.539166	1	0.199,0.189,0.178	0.172,0.193,0.231	-0.01	chr7:44470537-44470859(+)	chr7:44470537-44471113(+)
ENSMUSG00000030805	Stx4a	chr7	+	127842422	127842544	127842444	127842544	127842263	127842365	2408	331614	760555280	142825	2761067643	172	150	0.511466	1	0.036,0.025,0.042	0.042,0.022,0.033	0.002	chr7:127842365-127842423(+)	chr7:127842365-127842445(+)
ENSMUSG00000015377	Dennd6b	chr15	-	89186955	89187050	89186955	89186998	89187147	89187243	2409	17147	17111	54218	896	202	150	0.537651	1	0.426,0.486,0.839	0.317,0.776,0.69	-0.011	chr15:89187050-89187148(-)	chr15:89186998-89187148(-)
ENSMUSG00000026335	Pam	chr1	-	97825836	97826040	97825836	97826037	97831454	97831508	2411	285243116	381714	106498225	107425	153	150	0.292637	0.925221	0.88,0.933,0.89	0.912,0.868,0.898	0.008	chr1:97826040-97831455(-)	chr1:97826037-97831455(-)
ENSMUSG00000078789	Dph1	chr11	-	75180560	75180689	75180560	75180661	75180787	75180944	2413	613	1109530	352	4318689	178	150	0.585015	1	0.044,0.009,0.078	0.056,0.022,0.019	0.011	chr11:75180689-75180788(-)	chr11:75180661-75180788(-)
ENSMUSG00000020232	Hmg20b	chr10	-	81347435	81347562	81347435	81347508	81347985	81348032	2414	31102	24316779	72630	110400257	204	150	0.952425	1	0.086,0.042,0.018	0.045,0.046,0.079	-0.008	chr10:81347562-81347986(-)	chr10:81347508-81347986(-)
ENSMUSG00000027177	Hipk3	chr2	-	104436996	104437120	104436996	104437069	104437850	104438007	2418	720532258	501	220974501	3109	201	150	0.13365	0.618891	0.991,1.0,0.995	0.982,0.986,0.976	0.014	chr2:104437120-104437851(-)	chr2:104437069-104437851(-)
ENSMUSG00000038039	Gcc2	chr10	+	58256746	58256904	58256819	58256904	58255828	58255882	2420	1755	15414178	72110	53279124	223	150	0.523095	1	0.069,0.023,0.041	0.082,0.048,0.051	-0.016	chr10:58255882-58256747(+)	chr10:58255882-58256820(+)
ENSMUSG00000038039	Gcc2	chr10	+	58296087	58296239	58296099	58296239	58294710	58294905	2421	21614265	0	69330139	1	162	150	1	1	1.0,1.0,1.0	1.0,1.0,0.992	0.003	chr10:58294905-58296088(+)	chr10:58294905-58296100(+)
ENSMUSG00000030603	Psmc4	chr7	-	28049103	28049700	28049103	28049202	28049982	28050056	2424	43403	1226785423	236719	46618431051	300	150	0.754714	1	0.017,0.025,0.004	0.024,0.018,0.009	-0.002	chr7:28049700-28049983(-)	chr7:28049202-28049983(-)
ENSMUSG00000029016	Clcn6	chr4	-	148010653	148010810	148010653	148010776	148010971	148011129	2427	432614	1295	208143	3215	184	150	0.162203	0.699918	0.745,0.702,0.695	0.845,0.759,0.875	-0.112	chr4:148010810-148010972(-)	chr4:148010776-148010972(-)
ENSMUSG00000029016	Clcn6	chr4	-	148024108	148024224	148024108	148024215	148026532	148026599	2428	0	634115	10	166737	159	150	1	1	0.0,0.0,0.0	0.0,0.014,0.0	-0.005	chr4:148024224-148026533(-)	chr4:148024215-148026533(-)
ENSMUSG00000040272	Accs	chr2	-	93847916	93848189	93847916	93848186	93849764	93849939	2435	613831	18348	194942	42610	153	150	0.490037	1	0.769,0.523,0.792	0.823,0.649,0.805	-0.064	chr2:93848189-93849765(-)	chr2:93848186-93849765(-)
ENSMUSG00000024947	Men1	chr19	+	6337478	6337519	6337481	6337519	6337152	6337281	2436	515357199	8102	166776444	47	153	150	0.0978861	0.530329	0.984,0.972,0.99	1.0,0.995,0.984	-0.011	chr19:6337281-6337479(+)	chr19:6337281-6337482(+)
ENSMUSG00000022844	Pdia5	chr16	-	35410293	35410454	35410293	35410435	35410926	35410997	2445	15014096	423	108421221	144	169	150	0.868628	1	0.971,0.984,0.966	1.0,0.964,0.98	-0.008	chr16:35410454-35410927(-)	chr16:35410435-35410927(-)
ENSMUSG00000079036	Alkbh1	chr12	-	87431399	87431593	87431399	87431538	87434118	87434209	2448	417339120	15111958	109377292	3220092	205	150	1	1	0.669,0.676,0.602	0.714,0.58,0.699	-0.015	chr12:87431593-87434119(-)	chr12:87431538-87434119(-)
ENSMUSG00000032067	Pts	chr9	-	50524722	50524964	50524722	50524779	50525261	50525284	2449	1429945	454319146	3316782	157722395	300	150	0.00676845	0.109104	0.135,0.134,0.134	0.095,0.104,0.094	0.037	chr9:50524964-50525262(-)	chr9:50524779-50525262(-)
ENSMUSG00000003420	Fcgrt	chr7	-	45102413	45102671	45102413	45102593	45103002	45103273	2453	725326	200	1910368	0	228	150	1	1	0.959,1.0,1.0	1.0,1.0,1.0	-0.014	chr7:45102671-45103003(-)	chr7:45102593-45103003(-)
ENSMUSG00000033021	Gmppa	chr1	+	75440411	75440542	75440487	75440542	75439344	75439404	2460	736598295	32149	2571047546	93824	226	150	0.478283	1	0.939,0.966,0.956	0.95,0.948,0.938	0.008	chr1:75439404-75440412(+)	chr1:75439404-75440488(+)
ENSMUSG00000025212	Sfxn3	chr19	+	45049103	45049267	45049106	45049267	45047575	45047890	2461	15712450	22	56199156	25	153	150	0.782506	1	1.0,0.984,0.961	1.0,0.99,0.968	-0.004	chr19:45047890-45049104(+)	chr19:45047890-45049107(+)
ENSMUSG00000026365	Cfh	chr1	-	140088657	140088888	140088657	140088840	140098869	140099046	2462	100	302	2	3611	198	150	1	1	0.202,NA,0.0	0.0,0.0,0.121	0.061	chr1:140088888-140098870(-)	chr1:140088840-140098870(-)
ENSMUSG00000028347	Tmeff1	chr4	+	48617231	48617331	48617234	48617331	48614956	48614983	2464	232	0	110	30	153	150	1	1	1.0,1.0,1.0	NA,0.782,NA	0.218	chr4:48614983-48617232(+)	chr4:48614983-48617235(+)
ENSMUSG00000068823	Csde1	chr3	+	103044577	103044841	103044628	103044841	103043805	103043931	2467	818034	365427111245	3011269	124151302908	201	150	0.390674	1	0.016,0.022,0.02	0.018,0.016,0.017	0.002	chr3:103043931-103044578(+)	chr3:103043931-103044629(+)
ENSMUSG00000068823	Csde1	chr3	+	103044577	103044841	103044758	103044841	103043805	103043931	2468	403228731377	262	145754403063	463	300	150	1	1	0.999,0.996,0.997	0.995,0.998,0.998	0	chr3:103043931-103044578(+)	chr3:103043931-103044759(+)
ENSMUSG00000068823	Csde1	chr3	+	103044628	103044841	103044758	103044841	103043805	103043931	2469	763655462607	262	2677105035929	463	280	150	1	1	1.0,0.998,0.999	0.997,0.999,0.999	0.001	chr3:103043931-103044629(+)	chr3:103043931-103044759(+)
ENSMUSG00000026641	Usf1	chr1	+	171414372	171414529	171414436	171414529	171411312	171411440	2470	818539	640438234	3512284	186816477	214	150	0.727822	1	0.081,0.12,0.105	0.117,0.095,0.11	-0.005	chr1:171411440-171414373(+)	chr1:171411440-171414437(+)
ENSMUSG00000046169	Adamts6	chr13	+	104313630	104313719	104313635	104313719	104312714	104312926	2471	6113	11163	1613	6123	155	150	0.719605	1	0.345,0.4,0.492	0.0,0.563,0.807	-0.044	chr13:104312926-104313631(+)	chr13:104312926-104313636(+)
ENSMUSG00000039262	Prrc2b	chr2	+	32219213	32219405	32219216	32219405	32218676	32218759	2472	14011163	326245117	40212111	113437242	153	150	0.822219	1	0.296,0.308,0.346	0.258,0.322,0.31	0.02	chr2:32218759-32219214(+)	chr2:32218759-32219217(+)
ENSMUSG00000039262	Prrc2b	chr2	+	32221079	32221184	32221083	32221184	32220089	32220176	2473	437342143	20	137538282	10	154	150	1	1	1.0,0.994,1.0	1.0,0.998,1.0	-0.001	chr2:32220176-32221080(+)	chr2:32220176-32221084(+)
ENSMUSG00000042594	Sh2b3	chr5	-	121818464	121818679	121818464	121818649	121818759	121818854	2476	415291146	220	126540300	18	180	150	0.873265	1	0.994,0.992,1.0	1.0,0.998,0.969	0.006	chr5:121818679-121818760(-)	chr5:121818649-121818760(-)
ENSMUSG00000079435	Rpl36a	chrX	+	134586510	134586578	134586511	134586578	134586077	134586183	2477	21297152047629	2	82153236721576	60	151	150	1	1	1.0,1.0,1.0	1.0,1.0,1.0	0	chrX:134586183-134586511(+)	chrX:134586183-134586512(+)
ENSMUSG00000028639	Ybx1	chr4	-	119278933	119279211	119278933	119279199	119281569	119281652	2480	661425219	1021666853325	202823564	3457134448652	162	150	0.640475	1	0.057,0.056,0.057	0.051,0.054,0.057	0.003	chr4:119279211-119281570(-)	chr4:119279199-119281570(-)
ENSMUSG00000060036	Rpl3	chr15	-	80080895	80081211	80080895	80081031	80081614	80081783	2481	13471095507	19168146897323	59623551181	70702778717384	300	150	0.281621	0.902732	0.034,0.036,0.033	0.04,0.041,0.033	-0.004	chr15:80081211-80081615(-)	chr15:80081031-80081615(-)
ENSMUSG00000018750	Zbtb4	chr11	+	69775801	69776889	69775861	69776889	69775375	69775442	2485	321	19275	2	81719	210	150	1	1	0.101,0.05,0.125	0.0,0.0,0.07	0.069	chr11:69775442-69775802(+)	chr11:69775442-69775862(+)
ENSMUSG00000026090	2010300C02Rik	chr1	-	37611676	37612399	37611676	37612396	37613336	37613481	2486	630	503	233	71	153	150	0.634686	1	0.541,1.0,0.0	1.0,0.296,0.746	-0.167	chr1:37612399-37613337(-)	chr1:37612396-37613337(-)
ENSMUSG00000003868	Ruvbl2	chr7	-	45422091	45422206	45422091	45422134	45422384	45422514	2488	338320391142	20158	100645802823	104234	222	150	0.0322061	0.278331	0.991,0.989,0.99	0.986,0.987,0.982	0.005	chr7:45422206-45422385(-)	chr7:45422134-45422385(-)
ENSMUSG00000031660	Brd7	chr8	-	88334104	88334219	88334104	88334216	88337080	88337137	2490	806920	812606300	3310275	3001194646	153	150	0.807834	1	0.088,0.1,0.061	0.097,0.077,0.102	-0.009	chr8:88334219-88337081(-)	chr8:88334216-88337081(-)
ENSMUSG00000025507	Pidd1	chr7	-	141440457	141440605	141440457	141440521	141440685	141440865	2492	35023777	362	116425237	42	234	150	0.139148	0.636858	0.987,0.962,0.961	1.0,0.986,0.987	-0.021	chr7:141440605-141440686(-)	chr7:141440521-141440686(-)
ENSMUSG00000025507	Pidd1	chr7	-	141441172	141441374	141441172	141441316	141441474	141441529	2493	19614780	353328	64270153	48542	208	150	0.854748	1	0.802,0.763,0.673	0.92,0.696,0.724	-0.034	chr7:141441374-141441475(-)	chr7:141441316-141441475(-)
ENSMUSG00000025507	Pidd1	chr7	-	141441611	141441821	141441611	141441784	141442150	141442564	2495	1417345	1366	4115990	5219	187	150	0.41001	1	0.897,0.907,0.857	0.868,0.859,0.889	0.015	chr7:141441821-141442151(-)	chr7:141441784-141442151(-)
ENSMUSG00000025507	Pidd1	chr7	-	141441611	141441860	141441611	141441784	141442150	141442564	2496	705318	1366	118429	5219	226	150	0.154317	0.678316	0.781,0.854,0.666	0.594,0.726,0.681	0.1	chr7:141441860-141442151(-)	chr7:141441784-141442151(-)
ENSMUSG00000025507	Pidd1	chr7	-	141441611	141441860	141441611	141441821	141442150	141442564	2497	413912	1125939	66023	3613584	189	150	0.214973	0.803348	0.225,0.344,0.196	0.117,0.261,0.179	0.069	chr7:141441860-141442151(-)	chr7:141441821-141442151(-)
ENSMUSG00000017686	Rhot1	chr11	+	80243369	80243490	80243401	80243490	80242572	80242681	2500	477301186	7174	135671368	23716	182	150	0.0505551	0.362682	0.983,0.936,0.975	0.982,0.937,0.95	0.008	chr11:80242681-80243370(+)	chr11:80242681-80243402(+)
ENSMUSG00000043059	Zfp513	chr5	-	31200234	31200386	31200234	31200383	31200651	31200762	2502	203	200	293	230	153	150	1	1	0.495,NA,1.0	0.495,0.746,1.0	0.001	chr5:31200386-31200652(-)	chr5:31200383-31200652(-)
ENSMUSG00000002372	Ranbp3	chr17	+	56701022	56702890	56702762	56702890	56696717	56696789	2503	688493235	111710	210978560	21123	300	150	0.306235	0.949535	0.969,0.935,0.922	0.981,0.978,0.924	-0.019	chr17:56696789-56701023(+)	chr17:56696789-56702763(+)
ENSMUSG00000040651	Fam208a	chr14	+	27480641	27483555	27480915	27483555	27479923	27480091	2506	334268100	424921	113524243	203727	300	150	0.0227667	0.22565	0.799,0.732,0.704	0.739,0.876,0.818	-0.066	chr14:27480091-27480642(+)	chr14:27480091-27480916(+)
ENSMUSG00000022822	Abcc5	chr16	-	20392450	20392922	20392450	20392807	20396014	20396122	2512	616728	15715281	174726	85296167	265	150	1.64248e-07	6.2811e-05	0.18,0.2,0.164	0.102,0.082,0.081	0.093	chr16:20392922-20396015(-)	chr16:20392807-20396015(-)
ENSMUSG00000033083	Tbc1d4	chr14	-	101489511	101489622	101489511	101489619	101489852	101489944	2513	684927	11	3411048	1	153	150	1	1	1.0,0.98,0.964	1.0,1.0,0.979	-0.012	chr14:101489622-101489853(-)	chr14:101489619-101489853(-)
ENSMUSG00000026082	Rev1	chr1	-	38074314	38075023	38074314	38074443	38079289	38079398	2514	17918081	1208730	78263125	56139103	300	150	0.155458	0.681374	0.427,0.508,0.574	0.411,0.486,0.378	0.078	chr1:38075023-38079290(-)	chr1:38074443-38079290(-)
ENSMUSG00000036864	Proser3	chr7	-	30539133	30539582	30539133	30539578	30539748	30539830	2517	686036	13106	2311446	105	154	150	0.0164735	0.184743	0.836,0.854,0.854	1.0,0.917,0.9	-0.091	chr7:30539582-30539749(-)	chr7:30539578-30539749(-)
ENSMUSG00000036864	Proser3	chr7	-	30546124	30546228	30546124	30546225	30546302	30546427	2518	540	303510	499	153319	153	150	0.00910229	0.133027	0.14,0.101,0.0	0.207,0.211,0.317	-0.165	chr7:30546228-30546303(-)	chr7:30546225-30546303(-)
ENSMUSG00000034724	Cnot6l	chr5	-	96131058	96131245	96131058	96131241	96134010	96134132	2519	858685325	412614	3141099648	96434	154	150	0.338997	0.992957	0.953,0.962,0.958	0.971,0.944,0.949	0.003	chr5:96131245-96134011(-)	chr5:96131241-96134011(-)
ENSMUSG00000010453	Kansl3	chr1	-	36365481	36365652	36365481	36365585	36367768	36368034	2523	408367135	842	153560314	31313	217	150	0.042631	0.330451	0.972,0.984,0.979	0.972,0.968,0.943	0.017	chr1:36365652-36367769(-)	chr1:36365585-36367769(-)
ENSMUSG00000042198	Chchd7	chr4	+	3939378	3939526	3939423	3939526	3938913	3939131	2525	254172110	511710	70371216	137332	195	150	0.180556	0.737075	0.793,0.886,0.894	0.806,0.796,0.839	0.044	chr4:3939131-3939379(+)	chr4:3939131-3939424(+)
ENSMUSG00000042198	Chchd7	chr4	+	3942634	3942819	3942720	3942819	3941245	3941311	2526	1453	36721695	61613	120538286	236	150	0.507631	1	0.024,0.014,0.02	0.031,0.019,0.028	-0.007	chr4:3941311-3942635(+)	chr4:3941311-3942721(+)
ENSMUSG00000031400	G6pdx	chrX	-	74412318	74412480	74412318	74412477	74413863	74414081	2527	26910	1508871571	132815	51923131308	153	150	0.72777	1	0.017,0.01,0.017	0.024,0.012,0.011	-0.001	chrX:74412480-74413864(-)	chrX:74412477-74413864(-)
ENSMUSG00000027900	Dram2	chr3	+	106555163	106555308	106555166	106555308	106552155	106552280	2533	21518769	173211	83327176	175233	153	150	0.0888429	0.503333	0.925,0.851,0.86	0.827,0.86,0.839	0.037	chr3:106552280-106555164(+)	chr3:106552280-106555167(+)
ENSMUSG00000037570	Mcrs1	chr15	-	99249875	99250014	99249875	99250006	99250462	99250582	2534	410221119	104	153533331	402	158	150	1	1	0.997,1.0,0.966	0.973,1.0,0.994	-0.001	chr15:99250014-99250463(-)	chr15:99250006-99250463(-)
ENSMUSG00000026110	Mgat4a	chr1	-	37466536	37466583	37466536	37466579	37490259	37490393	2540	1137131	1487	3719672	574	154	150	0.0038034	0.0739873	0.887,0.896,0.812	0.878,0.965,0.946	-0.065	chr1:37466583-37490260(-)	chr1:37466579-37490260(-)
ENSMUSG00000031785	Adgrg1	chr8	+	95003235	95003673	95003250	95003673	95002438	95002513	2541	21618142	26542392747	46245176	74129932096	165	150	0.595662	1	0.069,0.064,0.049	0.053,0.069,0.071	-0.004	chr8:95002513-95003236(+)	chr8:95002513-95003251(+)
ENSMUSG00000037138	Aff3	chr1	-	38252640	38252681	38252640	38252678	38269709	38269761	2543	14114559	444622	42192118	125836	153	150	0.646296	1	0.759,0.756,0.724	0.774,0.764,0.763	-0.021	chr1:38252681-38269710(-)	chr1:38252678-38269710(-)
ENSMUSG00000040557	Mettl27	chr5	+	134932621	134932847	134932720	134932847	134932372	134932410	2547	343916	703	146526	224	249	150	0.523427	1	0.745,1.0,0.763	0.808,0.951,0.797	-0.016	chr5:134932410-134932622(+)	chr5:134932410-134932721(+)
ENSMUSG00000035206	Sppl2b	chr10	+	80863176	80863319	80863179	80863319	80862954	80863094	2548	14410047	302218124	39218148	83377230	153	150	0.0397008	0.317953	0.319,0.31,0.271	0.315,0.362,0.387	-0.055	chr10:80863094-80863177(+)	chr10:80863094-80863180(+)
ENSMUSG00000029622	Arpc1b	chr5	+	145125878	145125966	145125890	145125966	145125577	145125784	2550	603927	489230731911	278148	165169174218	162	150	0.886398	1	0.011,0.012,0.013	0.015,0.011,0.01	0	chr5:145125784-145125879(+)	chr5:145125784-145125891(+)
ENSMUSG00000041570	Camsap2	chr1	-	136274800	136274900	136274800	136274873	136276537	136276758	2551	17132	395012	41010	249837	177	150	0.031882	0.277095	0.27,0.181,0.124	0.124,0.08,0.186	0.062	chr1:136274900-136276538(-)	chr1:136274873-136276538(-)
ENSMUSG00000031486	Adgra2	chr8	+	27115654	27115874	27115788	27115874	27115236	27115461	2552	11102	220	11810	20	284	150	0.0955038	0.523765	0.744,0.725,1.0	1.0,0.826,1.0	-0.119	chr8:27115461-27115655(+)	chr8:27115461-27115789(+)
ENSMUSG00000005763	Cd247	chr1	+	165858442	165858478	165858445	165858478	165857415	165857496	2553	1302	100	246	22	153	150	1	1	0.927,NA,1.0	1.0,0.662,0.746	0.161	chr1:165857496-165858443(+)	chr1:165857496-165858446(+)
ENSMUSG00000005373	Mlxipl	chr5	+	135133075	135133176	135133108	135133176	135132314	135132861	2555	0	210	20	120	183	150	1	1	0.0,0.0,NA	0.0,0.45,NA	-0.225	chr5:135132861-135133076(+)	chr5:135132861-135133109(+)
ENSMUSG00000005373	Mlxipl	chr5	+	135133080	135133176	135133108	135133176	135132314	135132861	2556	0	210	20	120	178	150	1	1	0.0,0.0,NA	0.0,0.457,NA	-0.229	chr5:135132861-135133081(+)	chr5:135132861-135133109(+)
ENSMUSG00000054226	Tprkb	chr6	+	85915148	85915367	85915152	85915367	85914471	85914528	2560	8134	0	2175	20	154	150	1	1	1.0,1.0,1.0	1.0,0.892,1.0	0.036	chr6:85914528-85915149(+)	chr6:85914528-85915153(+)
ENSMUSG00000054226	Tprkb	chr6	+	85927240	85927363	85927258	85927363	85924359	85924522	2561	23319498	2	88385241	21	168	150	1	1	1.0,1.0,0.978	1.0,0.994,0.995	-0.004	chr6:85924522-85927241(+)	chr6:85924522-85927259(+)
ENSMUSG00000047528	Als2cr12	chr1	-	58658119	58658434	58658119	58658430	58658995	58659105	2564	200	20	3	0	154	150	1	1	1.0,0.0,NA	NA,NA,1.0	-0.5	chr1:58658434-58658996(-)	chr1:58658430-58658996(-)
ENSMUSG00000032913	Lrig2	chr3	-	104462658	104462808	104462658	104462787	104463858	104464308	2567	1016532	33326	3615179	126530	171	150	0.536031	1	0.729,0.641,0.824	0.725,0.671,0.698	0.033	chr3:104462808-104463859(-)	chr3:104462787-104463859(-)
ENSMUSG00000032913	Lrig2	chr3	-	104462658	104462845	104462658	104462787	104463858	104464308	2568	382313	33326	84428	126530	208	150	0.217565	0.807118	0.454,0.341,0.61	0.325,0.328,0.402	0.117	chr3:104462845-104463859(-)	chr3:104462787-104463859(-)
ENSMUSG00000032913	Lrig2	chr3	-	104462658	104462845	104462658	104462808	104463858	104464308	2569	161311	795530	6720	3411471	187	150	0.0947951	0.522919	0.14,0.159,0.227	0.124,0.047,0.184	0.057	chr3:104462845-104463859(-)	chr3:104462808-104463859(-)
ENSMUSG00000041763	Tpp2	chr1	+	43972529	43972687	43972555	43972687	43971563	43971732	2571	514369175	1074	158762439	42	176	150	0.0140627	0.168936	0.978,0.978,0.974	1.0,0.994,0.995	-0.02	chr1:43971732-43972530(+)	chr1:43971732-43972556(+)
ENSMUSG00000020128	Vps54	chr11	+	21264629	21264871	21264665	21264871	21263198	21263354	2573	29324596	2019865	117364207	58262141	186	150	0.422829	1	0.54,0.668,0.544	0.619,0.528,0.542	0.021	chr11:21263354-21264630(+)	chr11:21263354-21264666(+)
ENSMUSG00000035835	Plppr3	chr10	-	79866834	79867030	79866834	79866878	79867171	79867307	2574	23521449943	886	65038312078	5314	300	150	0.605935	1	0.993,0.989,0.987	0.985,0.984,0.996	0.001	chr10:79867030-79867172(-)	chr10:79866878-79867172(-)
ENSMUSG00000026004	Kansl1l	chr1	-	66773421	66773619	66773421	66773514	66777966	66778108	2575	13318165	758748	54164109	2512569	255	150	0.484256	1	0.511,0.55,0.443	0.56,0.436,0.482	0.009	chr1:66773619-66777967(-)	chr1:66773514-66777967(-)
ENSMUSG00000057789	Bak1	chr17	-	27022741	27022877	27022741	27022872	27025792	27025893	2576	21761461746	1022	70530211813	794	155	150	1	1	0.995,0.999,0.997	0.99,0.997,0.998	0.002	chr17:27022877-27025793(-)	chr17:27022872-27025793(-)
ENSMUSG00000028273	Pdlim5	chr3	-	142312122	142312541	142312122	142312214	142314405	142314448	2583	33825694	422	106372226	233	300	150	0.983328	1	0.977,0.985,0.959	0.964,0.984,0.974	0	chr3:142312541-142314406(-)	chr3:142312214-142314406(-)
ENSMUSG00000026049	Tex30	chr1	-	44099847	44100001	44099847	44099935	44101899	44101957	2585	551390173	1518	189866403	51417	216	150	0.509583	1	0.962,0.996,0.938	0.963,0.977,0.943	0.004	chr1:44100001-44101900(-)	chr1:44099935-44101900(-)
ENSMUSG00000057363	Uxs1	chr1	-	43790463	43790644	43790463	43790550	43797244	43797305	2587	527424188	1438	229825559	594	244	150	0.0355041	0.296538	0.959,0.989,0.935	0.966,0.983,0.988	-0.018	chr1:43790644-43797245(-)	chr1:43790550-43797245(-)
ENSMUSG00000057363	Uxs1	chr1	-	43805625	43805689	43805625	43805674	43807349	43807377	2588	776423	306226113	3512086	87519304	165	150	0.524106	1	0.186,0.205,0.156	0.268,0.174,0.205	-0.033	chr1:43805689-43807350(-)	chr1:43805674-43807350(-)
ENSMUSG00000023977	Ubr2	chr17	-	46988652	46988896	46988652	46988783	46990991	46991105	2590	494423	466434162	116734	168734356	263	150	0.179499	0.733501	0.057,0.055,0.075	0.036,0.049,0.052	0.017	chr17:46988896-46990992(-)	chr17:46988783-46990992(-)
ENSMUSG00000029501	Ankle2	chr5	+	110237654	110237851	110237657	110237851	110236272	110236479	2592	669500207	1228044	230855497	3316882	153	150	0.813814	1	0.843,0.86,0.822	0.872,0.833,0.856	-0.012	chr5:110236479-110237655(+)	chr5:110236479-110237658(+)
ENSMUSG00000026879	Gsn	chr2	+	35282650	35282721	35282659	35282721	35266819	35266903	2595	402	0	82	20	159	150	1	1	1.0,NA,1.0	NA,0.791,1.0	0.105	chr2:35266903-35282651(+)	chr2:35266903-35282660(+)
ENSMUSG00000052296	Ppp6r1	chr7	-	4641927	4642041	4641927	4642037	4642135	4642248	2596	280220791035	13116	97437062185	1139	154	150	1	1	0.995,0.995,0.994	0.999,0.996,0.996	-0.002	chr7:4642041-4642136(-)	chr7:4642037-4642136(-)
ENSMUSG00000021302	Ggps1	chr13	-	14059318	14059457	14059318	14059450	14063205	14063413	2598	11163	1283	4198	19	157	150	0.0383225	0.311812	0.467,0.656,0.489	1.0,0.948,0.459	-0.265	chr13:14059457-14063206(-)	chr13:14059450-14063206(-)
ENSMUSG00000019817	Plagl1	chr10	+	13116695	13116781	13116709	13116781	13112518	13112550	2602	100	0	10	2	164	150	1	1	1.0,NA,NA	NA,1.0,0.0	0.5	chr10:13112550-13116696(+)	chr10:13112550-13116710(+)
ENSMUSG00000025915	Sgk3	chr1	+	9885988	9886142	9886046	9886142	9885666	9885753	2606	343015	582378229	154632	185819347	208	150	0.75243	1	0.04,0.054,0.045	0.055,0.039,0.062	-0.006	chr1:9885753-9885989(+)	chr1:9885753-9886047(+)
ENSMUSG00000006019	Dhx34	chr7	-	16217987	16219184	16217987	16218950	16221683	16221993	2607	213610	360	22516	121	300	150	0.564938	1	0.778,0.75,1.0	1.0,0.51,0.889	0.043	chr7:16219184-16221684(-)	chr7:16218950-16221684(-)
ENSMUSG00000031959	Wdr59	chr8	-	111458922	111459049	111458922	111459046	111460582	111460655	2609	648029	797	3213479	1125	153	150	0.0712835	0.440862	0.9,0.897,0.802	0.969,0.916,0.939	-0.075	chr8:111459049-111460583(-)	chr8:111459046-111460583(-)
ENSMUSG00000030598	Fbxo17	chr7	+	28737338	28738144	28737664	28738144	28736067	28736203	2613	181110	22115	93620	82723	300	150	0.837596	1	0.29,0.333,0.5	0.36,0.4,0.303	0.02	chr7:28736203-28737339(+)	chr7:28736203-28737665(+)
ENSMUSG00000063652	Slc22a21	chr11	-	53960282	53960621	53960282	53960437	53969499	53969603	2614	1132	121	3105	0	300	150	0.0400041	0.319267	0.333,0.765,0.5	1.0,1.0,1.0	-0.467	chr11:53960621-53969500(-)	chr11:53960437-53969500(-)
ENSMUSG00000031010	Usp9x	chrX	+	13116608	13116757	13116623	13116757	13114507	13114644	2616	545531153	465425167	175727361	130508246	165	150	0.0314638	0.275576	0.516,0.532,0.454	0.55,0.565,0.572	-0.062	chrX:13114644-13116609(+)	chrX:13114644-13116624(+)
ENSMUSG00000043065	Spice1	chr16	+	44357743	44357903	44357759	44357903	44356144	44356192	2618	532	634130	38	2510062	166	150	0.790728	1	0.067,0.062,0.057	0.0,0.026,0.104	0.019	chr16:44356192-44357744(+)	chr16:44356192-44357760(+)
ENSMUSG00000022210	Dhrs4	chr14	+	55487092	55487571	55487259	55487571	55486116	55486218	2619	574446179	320	242827552	143	300	150	1	1	0.99,0.991,1.0	0.992,0.99,0.989	0.003	chr14:55486218-55487093(+)	chr14:55486218-55487260(+)
ENSMUSG00000036553	Sh3tc1	chr5	-	35699710	35699907	35699710	35699795	35700256	35700407	2622	1918859	11	42258100	22	262	150	1	1	1.0,0.981,0.971	1.0,0.987,0.966	0	chr5:35699907-35700257(-)	chr5:35699795-35700257(-)
ENSMUSG00000039242	B3galnt2	chr13	+	13991368	13991552	13991409	13991552	13990788	13990867	2623	415332111	29299	120506277	94616	191	150	0.918625	1	0.918,0.9,0.906	0.913,0.896,0.931	-0.005	chr13:13990867-13991369(+)	chr13:13990867-13991410(+)
ENSMUSG00000047793	Sned1	chr1	+	93281607	93281765	93281651	93281765	93281236	93281350	2626	400	20	30	4	194	150	1	1	1.0,0.0,NA	NA,1.0,0.0	0	chr1:93281350-93281608(+)	chr1:93281350-93281652(+)
ENSMUSG00000045751	Mms22l	chr4	+	24580050	24580202	24580053	24580202	24578752	24578903	2627	989923	14013549	5012075	53242114	153	150	0.913483	1	0.407,0.418,0.315	0.48,0.327,0.392	-0.02	chr4:24578903-24580051(+)	chr4:24578903-24580054(+)
ENSMUSG00000070565	Rasal2	chr1	-	157158658	157158858	157158658	157158837	157161124	157161326	2628	35167	7103	7178	4195	171	150	0.0384691	0.312363	0.814,0.584,0.672	0.606,0.44,0.584	0.147	chr1:157158858-157161125(-)	chr1:157158837-157161125(-)
ENSMUSG00000032803	Cdv3	chr9	-	103353103	103356029	103353103	103355313	103356279	103356439	2629	17851181592	639344171	62929591628	127673396	300	150	0.000660689	0.0226261	0.583,0.632,0.634	0.712,0.687,0.673	-0.074	chr9:103356029-103356280(-)	chr9:103355313-103356280(-)
ENSMUSG00000032803	Cdv3	chr9	-	103356279	103356439	103356279	103356433	103359875	103360018	2630	19521369699	845942	68330421577	4514690	156	150	0.229117	0.827155	0.957,0.957,0.941	0.936,0.952,0.944	0.008	chr9:103356439-103359876(-)	chr9:103356433-103359876(-)
ENSMUSG00000007050	Lsm2	chr17	+	34984979	34985139	34985108	34985139	34982619	34982687	2635	302815	942697338	73420	3551351833	279	150	0.0258488	0.243483	0.017,0.021,0.023	0.01,0.013,0.013	0.008	chr17:34982687-34984980(+)	chr17:34982687-34985109(+)
ENSMUSG00000038056	Kmt2c	chr5	-	25374489	25374567	25374489	25374564	25375341	25375455	2639	32427371	8206	67347173	51712	153	150	0.645379	1	0.975,0.93,0.921	0.929,0.952,0.934	0.004	chr5:25374567-25375342(-)	chr5:25374564-25375342(-)
ENSMUSG00000026159	Agfg1	chr1	+	82883180	82883361	82883243	82883361	82882227	82882437	2641	559397229	231411	168785410	34516	213	150	0.542119	1	0.945,0.952,0.936	0.975,0.925,0.947	-0.005	chr1:82882437-82883181(+)	chr1:82882437-82883244(+)
ENSMUSG00000026159	Agfg1	chr1	+	82894475	82894567	82894481	82894567	82893423	82893582	2642	23016775	583126	77376192	127443	156	150	0.232892	0.834954	0.792,0.838,0.735	0.861,0.83,0.811	-0.046	chr1:82893582-82894476(+)	chr1:82893582-82894482(+)
ENSMUSG00000037722	Gnpnat1	chr14	-	45380936	45381016	45380936	45380998	45381555	45381683	2644	1521	31926897	2139	120489260	168	150	0.812025	1	0.04,0.007,0.009	0.015,0.023,0.03	-0.004	chr14:45381016-45381556(-)	chr14:45380998-45381556(-)
ENSMUSG00000000605	Clcn4	chr7	-	7295969	7296069	7295969	7296061	7296723	7296878	2648	15016555	20	68213130	0	158	150	1	1	1.0,0.987,1.0	1.0,1.0,1.0	-0.004	chr7:7296069-7296724(-)	chr7:7296061-7296724(-)
ENSMUSG00000006289	Osgep	chr14	-	50919615	50919819	50919615	50919791	50919929	50920049	2649	49389	349254120	54527	99465296	178	150	0.031207	0.274873	0.106,0.112,0.059	0.041,0.075,0.071	0.03	chr14:50919819-50919930(-)	chr14:50919791-50919930(-)
ENSMUSG00000038712	Mindy1	chr3	+	95282919	95283625	95283230	95283625	95282682	95282744	2651	15413575	542818	61249152	358043	300	150	0.178891	0.732663	0.588,0.707,0.676	0.466,0.609,0.639	0.086	chr3:95282744-95282920(+)	chr3:95282744-95283231(+)
ENSMUSG00000038712	Mindy1	chr3	+	95295272	95295425	95295299	95295425	95294794	95294986	2652	21418471	50269	56268166	88034	177	150	0.142579	0.645898	0.784,0.857,0.87	0.856,0.74,0.805	0.037	chr3:95294986-95295273(+)	chr3:95294986-95295300(+)
ENSMUSG00000020827	Mink1	chr11	+	70603767	70603943	70603870	70603943	70603469	70603548	2654	465438225	0	139642345	2	253	150	1	1	1.0,1.0,1.0	1.0,1.0,0.99	0.003	chr11:70603548-70603768(+)	chr11:70603548-70603871(+)
ENSMUSG00000020827	Mink1	chr11	+	70605949	70606164	70606047	70606164	70604994	70605205	2655	1581	18718486	8167	50247118	248	150	0.205927	0.785534	0.046,0.026,0.007	0.088,0.038,0.035	-0.027	chr11:70605205-70605950(+)	chr11:70605205-70606048(+)
ENSMUSG00000020827	Mink1	chr11	+	70610077	70610183	70610080	70610183	70609553	70609717	2657	241185102	16185	76293165	72613	153	150	0.513342	1	0.937,0.91,0.952	0.914,0.917,0.926	0.014	chr11:70609717-70610078(+)	chr11:70609717-70610081(+)
ENSMUSG00000026283	Ing5	chr1	+	93811764	93811948	93811781	93811948	93806047	93806119	2659	1538	269236135	555	93476266	167	150	0.0130551	0.161482	0.048,0.011,0.051	0.046,0.009,0.017	0.013	chr1:93806119-93811765(+)	chr1:93806119-93811782(+)
ENSMUSG00000026222	Sp100	chr1	+	85674654	85675266	85675194	85675266	85673624	85673771	2662	624827	945661360	178425	3351355666	300	150	0.0589265	0.395342	0.032,0.035,0.036	0.025,0.03,0.018	0.01	chr1:85673771-85674655(+)	chr1:85673771-85675195(+)
ENSMUSG00000053291	Rab4b	chr7	-	27174715	27174840	27174715	27174778	27175778	27175893	2668	191611	533316183	113230	140724347	212	150	0.116375	0.579224	0.025,0.035,0.041	0.053,0.03,0.058	-0.013	chr7:27174840-27175779(-)	chr7:27174778-27175779(-)
ENSMUSG00000038975	Rabggtb	chr3	-	153908789	153908915	153908789	153908899	153909348	153909459	2669	409313164	28223893	224792508	100355243	166	150	0.000297104	0.013006	0.567,0.543,0.614	0.669,0.668,0.654	-0.089	chr3:153908915-153909349(-)	chr3:153908899-153909349(-)
ENSMUSG00000038975	Rabggtb	chr3	-	153910260	153910366	153910260	153910326	153910690	153910888	2671	578424208	300	2531037590	41	190	150	1	1	0.993,1.0,1.0	1.0,0.995,0.998	0	chr3:153910366-153910691(-)	chr3:153910326-153910691(-)
ENSMUSG00000052593	Adam17	chr12	-	21329053	21329155	21329053	21329132	21330032	21330163	2675	475	438410183	208	149675357	173	150	0.761704	1	0.008,0.015,0.023	0.012,0.0,0.019	0.005	chr12:21329155-21330033(-)	chr12:21329132-21330033(-)
ENSMUSG00000052593	Adam17	chr12	-	21347296	21347449	21347296	21347430	21349784	21349953	2676	352921	485372184	114620	171745421	169	150	0.0495832	0.360027	0.06,0.065,0.092	0.054,0.052,0.04	0.024	chr12:21347449-21349785(-)	chr12:21347430-21349785(-)
ENSMUSG00000026280	Atg4b	chr1	+	93775627	93778364	93778284	93778364	93775132	93775234	2677	557432182	972	232729443	5169	300	150	0.226919	0.825078	0.969,0.969,0.978	0.959,0.958,0.961	0.013	chr1:93775234-93775628(+)	chr1:93775234-93778285(+)
ENSMUSG00000039183	Nubp2	chr17	-	24882616	24883409	24882616	24883314	24883805	24883875	2678	522024	914578368	164738	3441442835	245	150	0.119567	0.587761	0.034,0.021,0.038	0.028,0.02,0.027	0.006	chr17:24883409-24883806(-)	chr17:24883314-24883806(-)
ENSMUSG00000039183	Nubp2	chr17	-	24883805	24883889	24883805	24883875	24884124	24884235	2679	642	529385233	261	223888503	164	150	1	1	0.01,0.009,0.008	0.008,0.006,0.002	0.004	chr17:24883889-24884125(-)	chr17:24883875-24884125(-)
ENSMUSG00000039183	Nubp2	chr17	-	24884400	24884514	24884400	24884483	24885418	24885617	2680	28414584	143	104382207	485	181	150	0.174879	0.726919	0.996,0.968,0.959	0.956,0.975,0.972	0.007	chr17:24884514-24885419(-)	chr17:24884483-24885419(-)
ENSMUSG00000039183	Nubp2	chr17	-	24884400	24884555	24884400	24884483	24885418	24885617	2681	1478918482	143	52022341269	485	222	150	1	1	0.999,0.994,0.991	0.989,0.995,0.994	0.002	chr17:24884555-24885419(-)	chr17:24884483-24885419(-)
ENSMUSG00000039183	Nubp2	chr17	-	24884400	24884586	24884400	24884483	24885418	24885617	2682	579321179	143	192804468	485	253	150	0.196378	0.768269	0.997,0.979,0.973	0.966,0.983,0.982	0.006	chr17:24884586-24885419(-)	chr17:24884483-24885419(-)
ENSMUSG00000039183	Nubp2	chr17	-	24884400	24884555	24884400	24884514	24885418	24885617	2683	1200781398	0	41618541070	4	191	150	1	1	1.0,1.0,1.0	1.0,1.0,0.995	0.002	chr17:24884555-24885419(-)	chr17:24884514-24885419(-)
ENSMUSG00000039183	Nubp2	chr17	-	24884400	24884586	24884400	24884514	24885418	24885617	2684	30318899	0	88434269	4	222	150	1	1	1.0,1.0,1.0	1.0,1.0,0.978	0.007	chr17:24884586-24885419(-)	chr17:24884514-24885419(-)
ENSMUSG00000039183	Nubp2	chr17	-	24884400	24884586	24884400	24884555	24885418	24885617	2685	271812	924611311	96229	3351482830	181	150	0.309109	0.950384	0.024,0.024,0.031	0.022,0.034,0.028	-0.002	chr17:24884586-24885419(-)	chr17:24884555-24885419(-)
ENSMUSG00000039183	Nubp2	chr17	-	24885418	24885634	24885418	24885617	24885718	24885837	2686	382625	640422221	136534	2491051524	167	150	0.430394	1	0.051,0.052,0.092	0.045,0.053,0.055	0.014	chr17:24885634-24885719(-)	chr17:24885617-24885719(-)
ENSMUSG00000037936	Scarb1	chr5	-	125283898	125284064	125283898	125284045	125284680	125284732	2688	2093	613421264	113025	239922575	169	150	0.0357982	0.297605	0.028,0.019,0.01	0.039,0.028,0.037	-0.016	chr5:125284064-125284681(-)	chr5:125284045-125284681(-)
ENSMUSG00000026333	Gin1	chr1	+	97782926	97783232	97783193	97783232	97777325	97777519	2690	785324	42135	4713087	42923	300	150	0.103827	0.548429	0.481,0.671,0.706	0.855,0.691,0.654	-0.114	chr1:97777519-97782927(+)	chr1:97777519-97783194(+)
ENSMUSG00000027018	Hat1	chr2	+	71434033	71434206	71434054	71434206	71421632	71421739	2694	393616	1184782440	56241	41517921019	171	150	0.412707	1	0.028,0.039,0.031	0.01,0.029,0.034	0.008	chr2:71421739-71434034(+)	chr2:71421739-71434055(+)
ENSMUSG00000038838	Vars2	chr17	-	35660403	35660597	35660403	35660509	35660723	35660799	2695	774	27422889	194	131370259	238	150	0.189557	0.752488	0.016,0.019,0.028	0.005,0.015,0.01	0.011	chr17:35660597-35660724(-)	chr17:35660509-35660724(-)
ENSMUSG00000055692	Tmem191c	chr16	+	17276961	17277250	17277193	17277250	17276633	17276887	2696	846525	12	2012952	247	300	150	0.00153668	0.0400673	1.0,0.97,0.862	0.833,0.942,0.788	0.09	chr16:17276887-17276962(+)	chr16:17276887-17277194(+)
ENSMUSG00000033022	Cdo1	chr18	-	46715596	46715815	46715596	46715766	46720286	46720441	2697	512	1163	1	844	199	150	0.000398045	0.0158987	0.255,0.112,0.334	0.0,0.0,0.159	0.181	chr18:46715815-46720287(-)	chr18:46715766-46720287(-)
ENSMUSG00000026632	Tatdn3	chr1	-	191049281	191049362	191049281	191049359	191052859	191052972	2701	1446	1674	2184	153723	153	150	0.0105445	0.144242	0.462,0.359,0.595	0.116,0.323,0.146	0.277	chr1:191049362-191052860(-)	chr1:191049359-191052860(-)
ENSMUSG00000029034	Ints11	chr4	+	155875137	155875366	155875228	155875366	155872849	155872923	2703	735549292	14138	2341080613	82414	241	150	0.715196	1	0.97,0.963,0.958	0.948,0.966,0.965	0.004	chr4:155872923-155875138(+)	chr4:155872923-155875229(+)
ENSMUSG00000112148	Lilrb4a	chr10	+	51494721	51494845	51494792	51494845	51493169	51494178	2712	1267337	1405477	5516583	56246168	221	150	0.321797	0.963921	0.379,0.479,0.246	0.4,0.313,0.251	0.047	chr10:51494178-51494722(+)	chr10:51494178-51494793(+)
ENSMUSG00000043909	Trp53bp1	chr2	-	121202542	121202758	121202542	121202752	121204332	121204548	2713	19013458	963	53215146	272	156	150	0.111389	0.568593	0.953,0.956,0.949	0.962,0.967,0.986	-0.019	chr2:121202758-121204333(-)	chr2:121202752-121204333(-)
ENSMUSG00000034563	Ccpg1	chr9	+	73005640	73005892	73005654	73005892	73001676	73001875	2714	521422224	14125	205713415	7165	164	150	0.411798	1	0.971,0.97,0.976	0.964,0.976,0.987	-0.003	chr9:73001875-73005641(+)	chr9:73001875-73005655(+)
ENSMUSG00000057246	BC051142	chr17	+	34417241	34417533	34417478	34417533	34416466	34416604	2716	9122	112	4117	82	300	150	0.344378	0.995809	0.818,0.857,0.333	1.0,0.407,0.636	-0.012	chr17:34416604-34417242(+)	chr17:34416604-34417479(+)
ENSMUSG00000026988	Wdsub1	chr2	-	59861560	59861740	59861560	59861737	59862619	59862726	2723	444317	21186	175941	93122	153	150	0.395239	1	0.673,0.701,0.735	0.649,0.651,0.646	0.054	chr2:59861740-59862620(-)	chr2:59861737-59862620(-)
ENSMUSG00000003573	Homer3	chr8	+	70291516	70291603	70291525	70291603	70291317	70291428	2725	14615964	200	61217147	0	159	150	1	1	0.986,1.0,1.0	1.0,1.0,1.0	-0.005	chr8:70291428-70291517(+)	chr8:70291428-70291526(+)
ENSMUSG00000030682	Cdipt	chr7	+	126978865	126978996	126978914	126978996	126978261	126978415	2728	21214	387199139	74518	123556305	199	150	0.597149	1	0.039,0.074,0.021	0.041,0.057,0.043	-0.002	chr7:126978415-126978866(+)	chr7:126978415-126978915(+)
ENSMUSG00000030682	Cdipt	chr7	+	126979257	126979403	126979304	126979403	126978914	126978996	2729	1792	826	22413	2104	197	150	0.492826	1	0.618,0.774,0.202	0.432,0.646,0.712	-0.065	chr7:126978996-126979258(+)	chr7:126978996-126979305(+)
ENSMUSG00000030682	Cdipt	chr7	+	126979257	126979403	126979321	126979403	126978914	126978996	2730	26194	596454246	63421	236896448	214	150	0.88032	1	0.03,0.028,0.011	0.018,0.026,0.032	-0.002	chr7:126978996-126979258(+)	chr7:126978996-126979322(+)
ENSMUSG00000030682	Cdipt	chr7	+	126979304	126979403	126979321	126979403	126978914	126978996	2731	17128	596454246	62212	236896448	167	150	0.666087	1	0.025,0.023,0.028	0.022,0.022,0.023	0.003	chr7:126978996-126979305(+)	chr7:126978996-126979322(+)
ENSMUSG00000052331	Ankrd44	chr1	-	54734995	54735113	54734995	54735059	54736229	54736312	2732	19194	521348167	7268	156560322	204	150	0.899519	1	0.026,0.039,0.017	0.032,0.033,0.018	0	chr1:54735113-54736230(-)	chr1:54735059-54736230(-)
ENSMUSG00000042498	D330045A20Rik	chrX	+	139513142	139513307	139513145	139513307	139511544	139511649	2733	650	224	55	374	153	150	0.522944	1	0.746,0.71,0.0	0.0,0.412,0.551	0.164	chrX:139511649-139513143(+)	chrX:139511649-139513146(+)
ENSMUSG00000070390	Nlrp1b	chr11	-	71172064	71172395	71172064	71172235	71172958	71173129	2734	100	2	10	2	300	150	1	1	1.0,NA,0.0	NA,1.0,0.0	0	chr11:71172395-71172959(-)	chr11:71172235-71172959(-)
ENSMUSG00000038943	Prc1	chr7	+	80313526	80313568	80313529	80313568	80313031	80313208	2736	1156024	162	3913893	142	153	150	0.281582	0.902732	0.991,0.907,0.922	0.975,0.971,0.979	-0.035	chr7:80313208-80313527(+)	chr7:80313208-80313530(+)
ENSMUSG00000044005	Gls2	chr10	+	128200143	128200302	128200172	128200302	128199636	128199758	2737	0	953	240	251	179	150	0.000593618	0.0207978	0.0,0.0,0.0	0.456,0.401,0.0	-0.286	chr10:128199758-128200144(+)	chr10:128199758-128200173(+)
ENSMUSG00000005882	Uqcc1	chr2	-	155910356	155910467	155910356	155910464	155911740	155911836	2739	33306	437335132	84521	145670393	153	150	0.272848	0.89184	0.069,0.081,0.043	0.051,0.062,0.05	0.01	chr2:155910467-155911741(-)	chr2:155910464-155911741(-)
ENSMUSG00000005882	Uqcc1	chr2	-	155921634	155921727	155921634	155921725	155930012	155930060	2743	12712864	4	69262166	221	152	150	1	1	1.0,1.0,0.94	0.971,0.992,0.994	-0.006	chr2:155921727-155930013(-)	chr2:155921725-155930013(-)
ENSMUSG00000033228	Scaf11	chr15	-	96415031	96415151	96415031	96415149	96415776	96415947	2744	496410156	200	169644390	41	152	150	1	1	0.996,1.0,1.0	1.0,0.994,0.997	0.002	chr15:96415151-96415777(-)	chr15:96415149-96415777(-)
ENSMUSG00000036712	Cyld	chr8	+	88719288	88719396	88719297	88719396	88709890	88709996	2746	262	463401199	30	149675393	159	150	1	1	0.004,0.014,0.009	0.0,0.004,0.0	0.008	chr8:88709996-88719289(+)	chr8:88709996-88719298(+)
ENSMUSG00000029022	Miip	chr4	-	147860790	147861085	147860790	147861013	147861353	147861491	2747	666444226	323022	143660499	96847	222	150	0.023389	0.227882	0.934,0.909,0.874	0.915,0.868,0.878	0.019	chr4:147861085-147861354(-)	chr4:147861013-147861354(-)
ENSMUSG00000026203	Dnajb2	chr1	+	75239107	75239333	75239279	75239333	75237454	75237564	2750	752	354013	2103	134244	300	150	0.954978	1	0.091,0.059,0.071	0.071,0.106,0.033	0.004	chr1:75237564-75239108(+)	chr1:75237564-75239280(+)
ENSMUSG00000041757	Plekha6	chr1	+	133269999	133270202	133270059	133270202	133266565	133266666	2751	11248	0	42517	100	210	150	1	1	1.0,1.0,1.0	0.741,1.0,1.0	0.086	chr1:133266666-133270000(+)	chr1:133266666-133270060(+)
ENSMUSG00000022440	C1qtnf6	chr15	-	78523345	78525398	78523345	78525187	78527227	78527468	2753	11911654	702	46234118	1106	300	150	0.294914	0.928667	0.895,1.0,0.931	0.958,0.921,0.908	0.013	chr15:78525398-78527228(-)	chr15:78525187-78527228(-)
ENSMUSG00000043262	Uevld	chr7	-	46940132	46940303	46940132	46940277	46943787	46943890	2755	816549	16268	43158104	73012	176	150	0.0854604	0.491243	0.812,0.681,0.839	0.84,0.818,0.881	-0.069	chr7:46940303-46943788(-)	chr7:46940277-46943788(-)
ENSMUSG00000038822	Hace1	chr10	+	45700953	45701024	45701010	45701024	45700576	45700675	2756	14910034	30	52201112	230	207	150	0.583178	1	1.0,0.96,1.0	0.95,0.98,1.0	0.01	chr10:45700675-45700954(+)	chr10:45700675-45701011(+)
ENSMUSG00000028464	Tpm2	chr4	-	43514710	43516003	43514710	43514861	43518229	43518299	2763	564	463517	2	174941	300	150	0.000141996	0.00804308	0.052,0.079,0.105	0.0,0.0,0.024	0.071	chr4:43516003-43518230(-)	chr4:43514861-43518230(-)
ENSMUSG00000001034	Mapk7	chr11	-	61492903	61493185	61492903	61493069	61493523	61494266	2766	311910	22103	104816	33215	266	150	0.688408	1	0.443,0.517,0.653	0.653,0.458,0.376	0.042	chr11:61493185-61493524(-)	chr11:61493069-61493524(-)
ENSMUSG00000056608	Chd9	chr8	+	91034904	91035065	91034907	91035065	91033338	91034244	2773	19919689	716629	73322162	277242	153	150	0.0877237	0.499864	0.733,0.744,0.751	0.726,0.814,0.791	-0.034	chr8:91034244-91034905(+)	chr8:91034244-91034908(+)
ENSMUSG00000028099	Polr3c	chr3	-	96716666	96716805	96716666	96716747	96719233	96719326	2775	43187	359246118	154922	120466322	208	150	0.859348	1	0.08,0.05,0.041	0.083,0.07,0.047	-0.01	chr3:96716805-96719234(-)	chr3:96716747-96719234(-)
ENSMUSG00000051396	Gm45902	chr2	-	3508292	3509095	3508292	3509020	3511014	3511097	2779	1028334	252320	249953	72714	225	150	0.480218	1	0.731,0.706,0.531	0.696,0.71,0.716	-0.051	chr2:3509095-3511015(-)	chr2:3509020-3511015(-)
ENSMUSG00000049488	Tmem67	chr4	-	12075454	12075529	12075454	12075525	12075622	12075692	2782	171510	100	74734	20	154	150	1	1	0.943,1.0,1.0	1.0,0.958,1.0	-0.005	chr4:12075529-12075623(-)	chr4:12075525-12075623(-)
ENSMUSG00000055725	Paqr3	chr5	-	97099545	97099743	97099545	97099680	97103359	97103515	2787	503419	24	127234	250	213	150	0.920634	1	1.0,0.923,0.77	0.809,0.91,1.0	-0.009	chr5:97099743-97103360(-)	chr5:97099680-97103360(-)
ENSMUSG00000079487	Med12	chrX	+	101293936	101294012	101293957	101294012	101293792	101293870	2789	26157	344293122	4109	99477232	171	150	0.00216595	0.050752	0.062,0.043,0.048	0.034,0.018,0.033	0.023	chrX:101293870-101293937(+)	chrX:101293870-101293958(+)
ENSMUSG00000079487	Med12	chrX	+	101296592	101296733	101296616	101296733	101295841	101296088	2790	43368	0	125117	20	174	150	1	1	1.0,1.0,1.0	1.0,0.956,1.0	0.015	chrX:101296088-101296593(+)	chrX:101296088-101296617(+)
ENSMUSG00000027327	1700037H04Rik	chr2	-	131151617	131151760	131151617	131151756	131153593	131153710	2792	579430205	250	202768498	42	154	150	1	1	0.996,0.988,1.0	1.0,0.995,0.996	-0.002	chr2:131151760-131153594(-)	chr2:131151756-131153594(-)
ENSMUSG00000037544	Dlgap5	chr14	-	47405774	47405901	47405774	47405865	47406338	47406418	2795	364258141	746817	140485316	239958	186	150	0.69848	1	0.799,0.754,0.87	0.831,0.798,0.815	-0.007	chr14:47405901-47406339(-)	chr14:47405865-47406339(-)
ENSMUSG00000006498	Ptbp1	chr10	+	79858951	79859271	79859071	79859271	79858751	79858824	2796	1003473393662	29508	3313139088411	94130	270	150	0.863246	1	0.995,0.988,0.996	0.995,0.995,0.994	-0.002	chr10:79858824-79858952(+)	chr10:79858824-79859072(+)
ENSMUSG00000031256	Cstf2	chrX	+	134073135	134073277	134073213	134073277	134069844	134069907	2798	671456238	11312254	213920676	4813180	228	150	0.00944993	0.135518	0.796,0.711,0.744	0.745,0.822,0.848	-0.055	chrX:134069907-134073136(+)	chrX:134069907-134073214(+)
ENSMUSG00000028931	Kcnab2	chr4	-	152404599	152404644	152404599	152404642	152407126	152407206	2801	1393863482	200	46818821128	0	152	150	1	1	0.999,1.0,1.0	1.0,1.0,1.0	0	chr4:152404644-152407127(-)	chr4:152404642-152407127(-)
ENSMUSG00000026956	Uap1l1	chr2	-	25363805	25363999	25363805	25363829	25364100	25364273	2802	824512288	100	3331184742	10	300	150	1	1	0.998,1.0,1.0	1.0,0.998,1.0	0	chr2:25363999-25364101(-)	chr2:25363829-25364101(-)
ENSMUSG00000039449	Prpf18	chr2	-	4643650	4643784	4643650	4643764	4645568	4645673	2803	171913	320231109	8395	113528253	170	150	0.236624	0.841106	0.045,0.068,0.095	0.059,0.061,0.017	0.024	chr2:4643784-4645569(-)	chr2:4643764-4645569(-)
ENSMUSG00000027597	Ahcy	chr2	-	155067322	155067398	155067322	155067362	155068827	155069018	2804	17641065675	240	60323151534	50	186	150	1	1	0.999,0.995,1.0	1.0,0.997,1.0	-0.001	chr2:155067398-155068828(-)	chr2:155067362-155068828(-)
ENSMUSG00000004591	Pkn2	chr3	-	142810360	142810487	142810360	142810434	142810690	142810865	2811	455354165	433	178596347	464	203	150	0.540506	1	0.988,0.989,0.976	0.97,0.987,0.985	0.004	chr3:142810487-142810691(-)	chr3:142810434-142810691(-)
ENSMUSG00000037364	Srrt	chr5	-	137295986	137296113	137295986	137296092	137296217	137296307	2813	669407206	29523298	200913487	106457250	171	150	0.717696	1	0.665,0.606,0.648	0.623,0.637,0.631	0.009	chr5:137296113-137296218(-)	chr5:137296092-137296218(-)
ENSMUSG00000037364	Srrt	chr5	-	137296217	137296319	137296217	137296307	137296466	137296623	2814	14651155446	24119274	51319551153	65343187	162	150	0.717464	1	0.849,0.848,0.848	0.88,0.841,0.851	-0.009	chr5:137296319-137296467(-)	chr5:137296307-137296467(-)
ENSMUSG00000037364	Srrt	chr5	-	137298725	137298883	137298725	137298880	137299557	137299672	2815	19291310600	372914	67325601455	146732	153	150	0.445694	1	0.981,0.978,0.977	0.979,0.974,0.978	0.002	chr5:137298883-137299558(-)	chr5:137298880-137299558(-)
ENSMUSG00000057110	Cntrl	chr2	+	35147231	35147411	35147234	35147411	35145056	35145236	2818	543458176	754721	139700336	207339	153	150	0.714578	1	0.877,0.905,0.892	0.872,0.904,0.894	0.001	chr2:35145236-35147232(+)	chr2:35145236-35147235(+)
ENSMUSG00000043241	Upf2	chr2	+	6040108	6040210	6040111	6040210	6034111	6034251	2819	1165437	0	3712457	10	153	150	1	1	1.0,1.0,1.0	1.0,0.992,1.0	0.003	chr2:6034251-6040109(+)	chr2:6034251-6040112(+)
ENSMUSG00000043241	Upf2	chr2	+	6046897	6047065	6046900	6047065	6040462	6040561	2820	21213471	343422	84259154	166436	153	150	0.795311	1	0.859,0.794,0.76	0.837,0.799,0.807	-0.01	chr2:6040561-6046898(+)	chr2:6040561-6046901(+)
ENSMUSG00000030271	Ogg1	chr6	+	113329145	113329408	113329228	113329408	113328364	113328612	2822	704523	1147351	158465	61193133	233	150	0.0602886	0.400921	0.283,0.284,0.225	0.137,0.219,0.239	0.066	chr6:113328612-113329146(+)	chr6:113328612-113329229(+)
ENSMUSG00000030271	Ogg1	chr6	+	113329145	113329408	113329335	113329408	113328364	113328612	2823	1979858	10	49223151	2	300	150	1	1	1.0,0.98,1.0	1.0,1.0,0.974	0.002	chr6:113328612-113329146(+)	chr6:113328612-113329336(+)
ENSMUSG00000030271	Ogg1	chr6	+	113329228	113329408	113329335	113329408	113328364	113328612	2824	26813997	10	101358251	2	257	150	1	1	1.0,0.988,1.0	1.0,1.0,0.987	0	chr6:113328612-113329229(+)	chr6:113328612-113329336(+)
ENSMUSG00000026553	Copa	chr1	+	172110649	172110815	172110676	172110815	172110488	172110574	2832	576218	16561314632	175227	63122011205	177	150	0.00394539	0.0757548	0.028,0.038,0.024	0.022,0.02,0.019	0.01	chr1:172110574-172110650(+)	chr1:172110574-172110677(+)
ENSMUSG00000020368	Canx	chr11	-	50311603	50311784	50311603	50311780	50325492	50325673	2834	518836081813	1046935	158270854132	3014480	154	150	0.968231	1	0.98,0.981,0.981	0.981,0.98,0.981	0	chr11:50311784-50325493(-)	chr11:50311780-50325493(-)
ENSMUSG00000035585	Tsen34	chr7	+	3700527	3701004	3700614	3701004	3695351	3695621	2838	349235120	100	96509257	40	237	150	1	1	0.995,1.0,1.0	1.0,0.988,1.0	0.002	chr7:3695621-3700528(+)	chr7:3695621-3700615(+)
ENSMUSG00000045482	Trrap	chr5	+	144791270	144791368	144791273	144791368	144790820	144791187	2839	614492212	18718788	167589332	53211116	153	150	0.793149	1	0.763,0.721,0.703	0.755,0.732,0.737	-0.012	chr5:144791187-144791271(+)	chr5:144791187-144791274(+)
ENSMUSG00000045482	Trrap	chr5	+	144845414	144845614	144845468	144845614	144844198	144844289	2840	555496208	464119	129601311	43522	204	150	0.0389008	0.313186	0.899,0.899,0.889	0.96,0.927,0.912	-0.037	chr5:144844289-144845415(+)	chr5:144844289-144845469(+)
ENSMUSG00000032344	Cgas	chr9	-	78435440	78435727	78435440	78435683	78437302	78437522	2841	474311	26815472	194819	101417176	194	150	0.00697153	0.111154	0.119,0.178,0.106	0.127,0.082,0.077	0.039	chr9:78435727-78437303(-)	chr9:78435683-78437303(-)
ENSMUSG00000025916	Ppp1r42	chr1	-	9976586	9976746	9976586	9976699	9978815	9978947	2842	1122	1382	7269	51310	197	150	0.0590897	0.395858	0.392,0.16,0.432	0.516,0.604,0.407	-0.181	chr1:9976746-9978816(-)	chr1:9976699-9978816(-)
ENSMUSG00000002881	Nab1	chr1	-	52464784	52464947	52464784	52464944	52466889	52466979	2844	315274179	473324	125573283	246552	153	150	0.545203	1	0.868,0.891,0.88	0.836,0.896,0.842	0.022	chr1:52464947-52466890(-)	chr1:52464944-52466890(-)
ENSMUSG00000026456	Cyb5r1	chr1	+	134407816	134408487	134408403	134408487	134407573	134407703	2846	18012272	31522699	79306143	85395182	300	150	0.0109584	0.146187	0.222,0.213,0.267	0.317,0.279,0.282	-0.059	chr1:134407703-134407817(+)	chr1:134407703-134408404(+)
ENSMUSG00000035310	Lin54	chr5	-	100475688	100475831	100475688	100475827	100480197	100480321	2848	343256103	0	135504281	61	154	150	1	1	1.0,1.0,1.0	1.0,0.988,0.996	0.005	chr5:100475831-100480198(-)	chr5:100475827-100480198(-)
ENSMUSG00000023992	Trem2	chr17	+	48351690	48351930	48351745	48351930	48351100	48351191	2852	345	641820	219	77526	205	150	0.0381136	0.310663	0.033,0.14,0.155	0.0,0.17,0.202	-0.015	chr17:48351191-48351691(+)	chr17:48351191-48351746(+)
ENSMUSG00000041483	Zfp281	chr1	+	136625267	136630053	136625271	136630053	136624900	136625051	2853	0	24	1	160	154	150	1	1	NA,0.0,0.0	0.0,0.0,1.0	-0.333	chr1:136625051-136625268(+)	chr1:136625051-136625272(+)
ENSMUSG00000047617	Paxx	chr2	-	25459774	25459915	25459774	25459859	25460008	25460074	2854	796936	16511848	178660	62214140	206	150	0.0180086	0.19354	0.259,0.299,0.353	0.166,0.226,0.238	0.094	chr2:25459915-25460009(-)	chr2:25459859-25460009(-)
ENSMUSG00000038685	Rtel1	chr2	+	181353976	181354175	181354075	181354175	181352752	181352848	2860	502409175	0	192640396	1	249	150	1	1	1.0,1.0,1.0	1.0,1.0,0.996	0.001	chr2:181352848-181353977(+)	chr2:181352848-181354076(+)
ENSMUSG00000038685	Rtel1	chr2	+	181355309	181355552	181355327	181355552	181354352	181354442	2861	293414	12127	146923	155529	168	150	0.0010235	0.0311705	0.683,0.717,0.641	0.455,0.528,0.415	0.214	chr2:181354442-181355310(+)	chr2:181354442-181355328(+)
ENSMUSG00000038685	Rtel1	chr2	+	181355309	181355552	181355327	181355552	181355008	181355125	2862	12211352	734014	32157100	219449	168	150	0.124722	0.601207	0.599,0.716,0.768	0.576,0.599,0.646	0.087	chr2:181355125-181355310(+)	chr2:181355125-181355328(+)
ENSMUSG00000038685	Rtel1	chr2	+	181355309	181355552	181355416	181355552	181355008	181355125	2863	302261134	101	96376248	234	257	150	0.508065	1	0.994,1.0,0.987	0.966,0.987,0.973	0.018	chr2:181355125-181355310(+)	chr2:181355125-181355417(+)
ENSMUSG00000038685	Rtel1	chr2	+	181355327	181355552	181355416	181355552	181355008	181355125	2864	255190100	101	85327199	234	239	150	0.373891	1	0.994,1.0,0.984	0.964,0.986,0.969	0.02	chr2:181355125-181355328(+)	chr2:181355125-181355417(+)
ENSMUSG00000038685	Rtel1	chr2	+	181356345	181356616	181356357	181356616	181356157	181356258	2865	22211	583125	91512	257054	162	150	0.453198	1	0.26,0.385,0.036	0.25,0.166,0.171	0.031	chr2:181356258-181356346(+)	chr2:181356258-181356358(+)
ENSMUSG00000018189	Uchl5	chr1	+	143799920	143800034	143799923	143800034	143798390	143798493	2867	1100742322	929581362	3611464865	2881260707	153	150	0.447389	1	0.537,0.556,0.466	0.551,0.533,0.545	-0.023	chr1:143798493-143799921(+)	chr1:143798493-143799924(+)
ENSMUSG00000057375	Yipf1	chr4	+	107344487	107344678	107344511	107344678	107340985	107341102	2869	1274	523356190	3138	149798419	174	150	0.571695	1	0.019,0.017,0.018	0.017,0.014,0.016	0.002	chr4:107341102-107344488(+)	chr4:107341102-107344512(+)
ENSMUSG00000042508	Dmtf1	chr5	-	9121781	9122461	9121781	9121937	9124441	9124527	2870	19177	23518278	83215	92329191	300	150	0.873645	1	0.039,0.045,0.043	0.042,0.046,0.038	0	chr5:9122461-9124442(-)	chr5:9121937-9124442(-)
ENSMUSG00000042508	Dmtf1	chr5	-	9126539	9126749	9126539	9126643	9127956	9128108	2871	25819698	675	92367202	2101	256	150	0.153773	0.676939	0.962,0.943,0.92	0.964,0.956,0.992	-0.029	chr5:9126749-9127957(-)	chr5:9126643-9127957(-)
ENSMUSG00000042508	Dmtf1	chr5	-	9126539	9126802	9126539	9126643	9127956	9128108	2872	17917579	675	69269155	2101	300	150	0.203375	0.781129	0.937,0.926,0.888	0.945,0.931,0.987	-0.037	chr5:9126802-9127957(-)	chr5:9126643-9127957(-)
ENSMUSG00000042508	Dmtf1	chr5	-	9126539	9126802	9126539	9126749	9127956	9128108	2873	415416	1014827	165234	3313977	203	150	0.073367	0.448908	0.231,0.454,0.305	0.264,0.217,0.246	0.088	chr5:9126802-9127957(-)	chr5:9126749-9127957(-)
ENSMUSG00000042508	Dmtf1	chr5	-	9130367	9130652	9130367	9130477	9131275	9131308	2874	603621	23815072	237044	64300179	300	150	0.967839	1	0.112,0.107,0.127	0.152,0.104,0.109	-0.006	chr5:9130652-9131276(-)	chr5:9130477-9131276(-)
ENSMUSG00000042508	Dmtf1	chr5	-	9130367	9130693	9130367	9130477	9131275	9131308	2875	573415	23815072	186133	64300179	300	150	0.587996	1	0.107,0.102,0.094	0.123,0.092,0.084	0.001	chr5:9130693-9131276(-)	chr5:9130477-9131276(-)
ENSMUSG00000042508	Dmtf1	chr5	-	9130367	9130693	9130367	9130652	9131275	9131308	2876	996	528	583	81212	191	150	0.0177421	0.192935	0.586,0.779,0.371	0.329,0.344,0.164	0.3	chr5:9130693-9131276(-)	chr5:9130652-9131276(-)
ENSMUSG00000026872	Zeb2	chr2	-	45017396	45017468	45017396	45017465	45022846	45023104	2879	1017926372	18112	2681514680	51812	153	150	0.765811	1	0.982,0.988,0.995	0.981,0.988,0.982	0.005	chr2:45017468-45022847(-)	chr2:45017465-45022847(-)
ENSMUSG00000039678	Tbc1d13	chr2	+	30135368	30135552	30135408	30135552	30134796	30134870	2880	191610	16014757	82610	63250116	190	150	0.432187	1	0.086,0.079,0.122	0.091,0.076,0.064	0.019	chr2:30134870-30135369(+)	chr2:30134870-30135409(+)
ENSMUSG00000030374	Strn4	chr7	+	16831345	16831580	16831464	16831580	16831024	16831138	2882	494718	974936	124430	3210972	269	150	0.0374811	0.307144	0.22,0.348,0.218	0.173,0.184,0.189	0.08	chr7:16831138-16831346(+)	chr7:16831138-16831465(+)
ENSMUSG00000030374	Strn4	chr7	+	16831345	16831580	16831485	16831580	16831024	16831138	2883	807724	289231119	249658	122499284	290	150	0.0171934	0.191042	0.125,0.147,0.094	0.092,0.091,0.096	0.029	chr7:16831138-16831346(+)	chr7:16831138-16831486(+)
ENSMUSG00000030374	Strn4	chr7	+	16831464	16831580	16831485	16831580	16831024	16831138	2884	1308143	289231119	44163101	122499284	171	150	0.310359	0.951855	0.283,0.235,0.241	0.24,0.223,0.238	0.019	chr7:16831138-16831465(+)	chr7:16831138-16831486(+)
ENSMUSG00000032558	Nphp3	chr9	+	104040601	104040747	104040621	104040747	104039333	104039574	2890	0	382617	200	196429	170	150	1	1	0.0,0.0,0.0	0.085,0.0,0.0	-0.028	chr9:104039574-104040602(+)	chr9:104039574-104040622(+)
ENSMUSG00000055897	Ppp4r1l-ps	chr2	-	173592116	173592333	173592116	173592221	173592801	173593014	2892	29244	101710	91515	101714	262	150	0.457471	1	0.624,0.447,0.186	0.34,0.336,0.38	0.067	chr2:173592333-173592802(-)	chr2:173592221-173592802(-)
ENSMUSG00000055897	Ppp4r1l-ps	chr2	-	173615482	173616423	173615482	173615576	173659322	173659367	2893	9116	27227	150	53920	300	150	7.43044e-05	0.00524589	0.143,0.2,0.3	0.091,0.06,0.0	0.164	chr2:173616423-173659323(-)	chr2:173615576-173659323(-)
ENSMUSG00000022756	Slc7a4	chr16	-	17575616	17575968	17575616	17575965	17576639	17576698	2894	153	440	62	158	153	150	0.196278	0.768269	0.197,0.551,1.0	0.0,0.541,0.197	0.337	chr16:17575968-17576640(-)	chr16:17575965-17576640(-)
ENSMUSG00000026565	Pou2f1	chr1	-	165875902	165876048	165875902	165875976	165876976	165877065	2895	20915188	100	51258126	20	222	150	1	1	0.993,1.0,1.0	1.0,0.989,1.0	0.001	chr1:165876048-165876977(-)	chr1:165875976-165876977(-)
ENSMUSG00000058318	Phf21a	chr2	+	92215448	92215575	92215463	92215575	92214048	92214089	2896	14254	15511445	7189	4213172	165	150	0.853795	1	0.076,0.166,0.075	0.132,0.111,0.102	-0.009	chr2:92214089-92215449(+)	chr2:92214089-92215464(+)
ENSMUSG00000058318	Phf21a	chr2	+	92230637	92230724	92230658	92230724	92228448	92228481	2897	28185	26622689	103323	90352263	171	150	0.708467	1	0.085,0.065,0.047	0.089,0.076,0.071	-0.013	chr2:92228481-92230638(+)	chr2:92228481-92230659(+)
ENSMUSG00000058318	Phf21a	chr2	+	92326912	92327164	92326915	92327164	92320228	92320459	2899	24157	22233	103331	102120	153	150	0.365944	1	0.517,0.39,0.696	0.495,0.606,0.603	-0.034	chr2:92320459-92326913(+)	chr2:92320459-92326916(+)
ENSMUSG00000058318	Phf21a	chr2	+	92328311	92328401	92328314	92328401	92320228	92320459	2900	972	192216	1102	3197	153	150	0.528183	1	0.317,0.238,0.109	0.246,0.34,0.219	-0.047	chr2:92320459-92328312(+)	chr2:92320459-92328315(+)
ENSMUSG00000026972	Arrdc1	chr2	-	24926271	24926448	24926271	24926445	24926544	24926727	2903	353256124	8219	143558304	81817	153	150	0.483692	1	0.977,0.923,0.931	0.946,0.968,0.946	-0.01	chr2:24926448-24926545(-)	chr2:24926445-24926545(-)
ENSMUSG00000026972	Arrdc1	chr2	-	24926877	24927032	24926877	24926946	24927125	24927176	2904	910744312	113	3071394763	212	236	150	1	1	0.998,0.998,0.985	0.99,0.999,0.996	-0.001	chr2:24927032-24927126(-)	chr2:24926946-24927126(-)
ENSMUSG00000026972	Arrdc1	chr2	-	24927125	24927176	24927125	24927172	24927728	24927839	2905	352285155	0	123570286	200	154	150	1	1	1.0,1.0,1.0	0.984,1.0,1.0	0.005	chr2:24927176-24927729(-)	chr2:24927172-24927729(-)
ENSMUSG00000060733	Ipmk	chr10	+	71372704	71372880	71372707	71372880	71366008	71366105	2908	898042	228198108	3512575	75266192	153	150	0.448742	1	0.277,0.284,0.276	0.314,0.315,0.277	-0.023	chr10:71366105-71372705(+)	chr10:71366105-71372708(+)
ENSMUSG00000040751	Lat2	chr5	-	134606045	134606093	134606045	134606081	134606360	134606392	2910	18101	1126636	167	3111770	162	150	0.405645	1	0.13,0.123,0.025	0.0,0.112,0.085	0.027	chr5:134606093-134606361(-)	chr5:134606081-134606361(-)
ENSMUSG00000003808	Farsa	chr8	+	84867749	84867918	84867752	84867918	84867548	84867648	2911	879569378	956	3751333922	2210	153	150	0.703695	1	0.99,0.991,0.984	1.0,0.983,0.989	-0.002	chr8:84867648-84867750(+)	chr8:84867648-84867753(+)
ENSMUSG00000034361	Cpne2	chr8	+	94568590	94568827	94568593	94568827	94563956	94564090	2913	1223815413	53384	3181492877	188057	153	150	0.00619626	0.102989	0.958,0.955,0.99	0.945,0.948,0.938	0.024	chr8:94564090-94568591(+)	chr8:94564090-94568594(+)
ENSMUSG00000040044	Orc3	chr4	-	34577952	34578032	34577952	34578029	34579742	34579876	2914	359211156	27617590	156627329	98483253	153	150	0.95842	1	0.56,0.542,0.63	0.609,0.56,0.56	0.001	chr4:34578032-34579743(-)	chr4:34578029-34579743(-)
ENSMUSG00000040423	Rc3h1	chr1	+	160964949	160965120	160964976	160965120	160963707	160963840	2916	418279139	733	113425250	298	177	150	0.205164	0.783779	0.981,0.987,0.975	0.98,0.976,0.964	0.008	chr1:160963840-160964950(+)	chr1:160963840-160964977(+)
ENSMUSG00000015869	Prpsap1	chr11	-	116479651	116479839	116479651	116479824	116485868	116485935	2917	1477	477368152	61915	166571370	165	150	0.310509	0.951855	0.026,0.017,0.04	0.032,0.029,0.036	-0.005	chr11:116479839-116485869(-)	chr11:116479824-116485869(-)
ENSMUSG00000042289	Hsd3b7	chr7	+	127801391	127801616	127801460	127801616	127801074	127801246	2921	233414	276220105	94027	88450288	219	150	0.208142	0.790043	0.054,0.096,0.084	0.065,0.057,0.06	0.017	chr7:127801246-127801392(+)	chr7:127801246-127801461(+)
ENSMUSG00000042289	Hsd3b7	chr7	+	127802235	127802398	127802328	127802398	127802013	127802113	2923	569567199	330	204875489	16	243	150	1	1	0.992,0.992,1.0	1.0,0.998,0.981	0.002	chr7:127802113-127802236(+)	chr7:127802113-127802329(+)
ENSMUSG00000037475	Thoc2	chrX	-	41802946	41802992	41802946	41802986	41803455	41803532	2924	392390143	16151	150584317	82916	156	150	0.0918415	0.514604	0.959,0.962,0.993	0.947,0.951,0.95	0.022	chrX:41802992-41803456(-)	chrX:41802986-41803456(-)
ENSMUSG00000037475	Thoc2	chrX	-	41812458	41812575	41812458	41812494	41813949	41814008	2925	22615591	30423889	64296135	109458264	231	150	0.0385422	0.312363	0.326,0.297,0.399	0.276,0.296,0.249	0.067	chrX:41812575-41813950(-)	chrX:41812494-41813950(-)
ENSMUSG00000037475	Thoc2	chrX	-	41872564	41872686	41872564	41872679	41873881	41873952	2926	39631886	400	107443221	90	157	150	0.888565	1	0.99,1.0,1.0	1.0,0.979,1.0	0.004	chrX:41872686-41873882(-)	chrX:41872679-41873882(-)
ENSMUSG00000026245	Farsb	chr1	-	78479956	78480111	78479956	78480013	78482307	78482363	2927	1277910460	513229	43720091077	148063	248	150	0.781889	1	0.938,0.945,0.906	0.95,0.938,0.912	-0.004	chr1:78480111-78482308(-)	chr1:78480013-78482308(-)
ENSMUSG00000032966	Fkbp1a	chr2	+	151543905	151544140	151544012	151544140	151542817	151542865	2928	562815	220	267420	30	257	150	0.489848	1	0.942,0.891,1.0	1.0,0.935,1.0	-0.034	chr2:151542865-151543906(+)	chr2:151542865-151544013(+)
ENSMUSG00000027411	Vps16	chr2	+	130441607	130441705	130441616	130441705	130441394	130441503	2930	633435235	612421	198779466	227938	159	150	0.26035	0.875867	0.907,0.945,0.913	0.895,0.903,0.92	0.016	chr2:130441503-130441608(+)	chr2:130441503-130441617(+)
ENSMUSG00000026812	Tsc1	chr2	+	28672781	28672903	28672784	28672903	28672392	28672504	2931	210	14413842	12	42145119	153	150	1	1	0.013,0.007,0.0	0.0,0.007,0.016	-0.001	chr2:28672504-28672782(+)	chr2:28672504-28672785(+)
ENSMUSG00000026812	Tsc1	chr2	+	28675642	28675767	28675662	28675767	28675187	28675248	2932	7104	847322	3124	187850	170	150	0.828026	1	0.068,0.108,0.138	0.128,0.12,0.066	0	chr2:28675248-28675643(+)	chr2:28675248-28675663(+)
ENSMUSG00000026812	Tsc1	chr2	+	28678951	28679118	28678966	28679118	28678161	28678205	2933	496215	13244	229184	71910	165	150	0.0513982	0.365641	0.774,0.701,0.773	0.741,0.813,0.884	-0.063	chr2:28678205-28678952(+)	chr2:28678205-28678967(+)
ENSMUSG00000002297	Dbf4	chr5	-	8404870	8404916	8404870	8404913	8405801	8405838	2934	401256144	361610	143553354	144225	153	150	0.915669	1	0.916,0.94,0.934	0.909,0.928,0.933	0.007	chr5:8404916-8405802(-)	chr5:8404913-8405802(-)
ENSMUSG00000031399	Fam3a	chrX	-	74387033	74387105	74387033	74387084	74387437	74387496	2935	331	915827	21	3713359	171	150	0.2287	0.827033	0.028,0.043,0.031	0.0,0.013,0.015	0.025	chrX:74387105-74387438(-)	chrX:74387084-74387438(-)
ENSMUSG00000031399	Fam3a	chrX	-	74387627	74387806	74387627	74387751	74390473	74390497	2936	761	1117662	113	5015890	205	150	0.00856555	0.128037	0.044,0.055,0.012	0.014,0.005,0.024	0.023	chrX:74387806-74390474(-)	chrX:74387751-74390474(-)
ENSMUSG00000019738	Polr2i	chr7	+	30232691	30232823	30232749	30232823	30232481	30232536	2937	18142	756572285	61416	2811206735	208	150	0.392021	1	0.017,0.017,0.005	0.015,0.008,0.015	0	chr7:30232536-30232692(+)	chr7:30232536-30232750(+)
ENSMUSG00000039356	Exosc2	chr2	+	31676664	31676736	31676667	31676736	31675838	31675904	2944	642	294209110	66	124415269	153	150	0.573656	1	0.02,0.018,0.018	0.0,0.014,0.021	0.007	chr2:31675904-31676665(+)	chr2:31675904-31676668(+)
ENSMUSG00000028545	Bend5	chr4	+	111433086	111433553	111433168	111433553	111431016	111431150	2945	764	200	41613	496	232	150	9.86218e-05	0.00628577	0.694,1.0,1.0	0.393,0.535,0.583	0.394	chr4:111431150-111433087(+)	chr4:111431150-111433169(+)
ENSMUSG00000020235	Fzr1	chr10	-	81368522	81368756	81368522	81368596	81369073	81369258	2946	839600358	110	262972612	1	300	150	1	1	0.998,0.997,1.0	1.0,1.0,0.997	-0.001	chr10:81368756-81369074(-)	chr10:81368596-81369074(-)
ENSMUSG00000052033	Pfdn4	chr2	+	170516549	170516690	170516561	170516690	170515738	170515846	2947	700412268	0	2761170837	400	162	150	1	1	1.0,1.0,1.0	0.985,1.0,1.0	0.005	chr2:170515846-170516550(+)	chr2:170515846-170516562(+)
ENSMUSG00000027082	Tfpi	chr2	-	84440139	84443312	84440139	84442925	84444009	84444138	2950	432618	17177	118728	43325	300	150	0.770397	1	0.558,0.433,0.562	0.579,0.569,0.359	0.015	chr2:84443312-84444010(-)	chr2:84442925-84444010(-)
ENSMUSG00000030929	Eri2	chr7	-	119786738	119787485	119786738	119786827	119787733	119787834	2952	1298135	101811	3119783	42917	300	150	0.871315	1	0.866,0.692,0.614	0.795,0.773,0.709	-0.035	chr7:119787485-119787734(-)	chr7:119786827-119787734(-)
ENSMUSG00000030929	Eri2	chr7	-	119792264	119792348	119792264	119792343	119792430	119792498	2953	11010636	10129	3715780	42020	155	150	0.344221	0.995809	0.914,0.895,0.795	0.9,0.884,0.795	0.008	chr7:119792348-119792431(-)	chr7:119792343-119792431(-)
ENSMUSG00000014873	Surf2	chr2	+	26918864	26919055	26918872	26919055	26917427	26917531	2955	942	865728	22115	60326209	158	150	0.663787	1	0.09,0.062,0.064	0.031,0.058,0.064	0.021	chr2:26917531-26918865(+)	chr2:26917531-26918873(+)
ENSMUSG00000014873	Surf2	chr2	+	26918864	26919055	26918928	26919055	26917427	26917531	2956	623423	1407930	3322099	67531	214	150	0	0	0.237,0.232,0.35	0.794,0.673,0.691	-0.446	chr2:26917531-26918865(+)	chr2:26917531-26918929(+)
ENSMUSG00000014873	Surf2	chr2	+	26918872	26919055	26918928	26919055	26917427	26917531	2957	1398749	1407930	91525293	67531	206	150	0	0	0.42,0.445,0.543	0.917,0.836,0.873	-0.406	chr2:26917531-26918873(+)	chr2:26917531-26918929(+)
ENSMUSG00000041351	Rap1gap	chr4	+	137727676	137727779	137727729	137727779	137726951	137727075	2959	8185	2	595	100	203	150	1	1	1.0,1.0,0.649	0.787,1.0,1.0	-0.046	chr4:137727075-137727677(+)	chr4:137727075-137727730(+)
ENSMUSG00000041351	Rap1gap	chr4	+	137728228	137728363	137728259	137728363	137727676	137727779	2960	222	3112	332	133	181	150	0.111376	0.568593	0.356,0.131,0.453	0.713,0.453,0.356	-0.194	chr4:137727779-137728229(+)	chr4:137727779-137728260(+)
ENSMUSG00000026566	Mpzl1	chr1	-	165601749	165601864	165601749	165601855	165604609	165604742	2962	200	42916	0	113232	159	150	1	1	0.043,0.0,0.0	0.0,0.0,0.0	0.014	chr1:165601864-165604610(-)	chr1:165601855-165604610(-)
ENSMUSG00000025271	Pfkfb1	chrX	+	150589795	150590084	150589952	150590084	150588944	150589044	2964	23228	21298	13183	123120	300	150	0.10152	0.541331	0.354,0.275,0.333	0.351,0.225,0.07	0.105	chrX:150589044-150589796(+)	chrX:150589044-150589953(+)
ENSMUSG00000006281	Tep1	chr14	-	50824504	50824609	50824504	50824554	50824731	50824949	2966	15510766	1	45213105	0	205	150	1	1	1.0,1.0,0.98	1.0,1.0,1.0	-0.007	chr14:50824609-50824732(-)	chr14:50824554-50824732(-)
ENSMUSG00000006281	Tep1	chr14	-	50844254	50844430	50844254	50844357	50844533	50844728	2967	13911948	220	44226137	20	223	150	0.761812	1	0.979,0.976,1.0	1.0,0.987,1.0	-0.011	chr14:50844430-50844534(-)	chr14:50844357-50844534(-)
ENSMUSG00000039463	Slc9a8	chr2	+	167459648	167459754	167459660	167459754	167457326	167457465	2968	20614474	210	70219150	120	162	150	1	1	0.99,0.993,1.0	0.985,0.99,1.0	0.003	chr2:167457465-167459649(+)	chr2:167457465-167459661(+)
ENSMUSG00000039686	Zer1	chr2	-	30110204	30110420	30110204	30110381	30110661	30111098	2972	6130	244235107	2610	100317210	189	150	0.991646	1	0.019,0.042,0.0	0.016,0.015,0.036	-0.002	chr2:30110420-30110662(-)	chr2:30110381-30110662(-)
ENSMUSG00000043557	Mdga1	chr17	-	29832912	29833021	29832912	29832969	29833221	29833352	2973	30225298	935	69273224	287	202	150	0.730026	1	0.961,0.984,0.936	0.962,0.962,0.96	-0.001	chr17:29833021-29833222(-)	chr17:29832969-29833222(-)
ENSMUSG00000033526	Ppip5k1	chr2	-	121347480	121347683	121347480	121347642	121348466	121348568	2975	1495	625635	2710	159556	191	150	0.137515	0.631689	0.151,0.112,0.101	0.095,0.055,0.123	0.03	chr2:121347683-121348467(-)	chr2:121347642-121348467(-)
ENSMUSG00000027710	Acad9	chr3	+	36087719	36087799	36087759	36087799	36085413	36085542	2977	509352156	833	169613340	2116	190	150	0.51381	1	0.98,0.989,0.976	0.985,0.978,0.978	0.001	chr3:36085542-36087720(+)	chr3:36085542-36087760(+)
ENSMUSG00000040688	Tbl3	chr17	-	24701976	24702068	24701976	24702047	24702144	24702375	2979	362311	22717185	145739	87380263	171	150	0.754256	1	0.122,0.106,0.102	0.124,0.116,0.115	-0.008	chr17:24702068-24702145(-)	chr17:24702047-24702145(-)
ENSMUSG00000001376	Vps50	chr6	+	3601367	3603315	3602659	3603315	3600127	3600317	2980	182212	21015878	113414	88339201	300	150	0.33352	0.985528	0.041,0.065,0.071	0.059,0.048,0.034	0.012	chr6:3600317-3601368(+)	chr6:3600317-3602660(+)
ENSMUSG00000027624	Epb41l1	chr2	+	156510732	156510881	156510735	156510881	156509131	156509307	2981	750	3	210	100	153	150	1	1	1.0,1.0,0.0	0.662,1.0,NA	-0.164	chr2:156509307-156510733(+)	chr2:156509307-156510736(+)
ENSMUSG00000027624	Epb41l1	chr2	+	156510732	156510881	156510756	156510881	156509131	156509307	2982	1060	112	412	30	174	150	0.246828	0.86071	0.896,0.838,0.0	1.0,0.223,1.0	-0.163	chr2:156509307-156510733(+)	chr2:156509307-156510757(+)
ENSMUSG00000027624	Epb41l1	chr2	+	156510735	156510881	156510756	156510881	156509131	156509307	2983	313	112	302	30	171	150	0.266736	0.885122	0.725,0.467,0.568	1.0,0.0,1.0	-0.08	chr2:156509307-156510736(+)	chr2:156509307-156510757(+)
ENSMUSG00000038421	Fcrla	chr1	-	170920833	170921118	170920833	170920984	170921517	170921784	2984	21510	10	81517	20	284	150	1	1	1.0,0.725,1.0	1.0,0.798,1.0	-0.024	chr1:170921118-170921518(-)	chr1:170920984-170921518(-)
ENSMUSG00000038421	Fcrla	chr1	-	170922221	170922407	170922221	170922404	170927461	170927583	2986	313	431	36	111	153	150	1	1	0.424,0.246,0.746	NA,0.211,0.855	-0.061	chr1:170922407-170927462(-)	chr1:170922404-170927462(-)
ENSMUSG00000047248	C2cd3	chr7	+	100379967	100380125	100380025	100380125	100374263	100374533	2990	408330160	13122	118494263	82815	208	150	0.00585705	0.100291	0.958,0.952,0.983	0.914,0.927,0.927	0.042	chr7:100374533-100379968(+)	chr7:100374533-100380026(+)
ENSMUSG00000047248	C2cd3	chr7	+	100413325	100413448	100413329	100413448	100410331	100410450	2991	24222194	2492	80353158	31311	154	150	0.257444	0.873336	0.908,0.96,0.979	0.963,0.964,0.933	-0.004	chr7:100410450-100413326(+)	chr7:100410450-100413330(+)
ENSMUSG00000062729	Ppox	chr1	-	171280139	171280288	171280139	171280255	171280387	171280522	2998	577431	1387832	239151	61197158	183	150	0.00918779	0.13385	0.253,0.437,0.443	0.236,0.275,0.209	0.138	chr1:171280288-171280388(-)	chr1:171280255-171280388(-)
ENSMUSG00000039637	Coro7	chr16	-	4633254	4633430	4633254	4633396	4633713	4633837	3001	1327918500	1001	4091992991	72	184	150	1	1	0.991,1.0,0.998	1.0,0.996,0.998	-0.002	chr16:4633430-4633714(-)	chr16:4633396-4633714(-)
ENSMUSG00000043085	Tmem82	chr4	-	141614944	141615135	141614944	141615110	141616203	141616621	3006	322	102	245	51	175	150	0.172468	0.720161	0.72,1.0,0.462	1.0,0.407,0.811	-0.012	chr4:141615135-141616204(-)	chr4:141615110-141616204(-)
ENSMUSG00000029802	Abcg2	chr6	+	58689538	58689644	58689554	58689644	58685666	58685821	3008	833	15014949	1212	47243170	166	150	0.370095	1	0.046,0.018,0.052	0.0,0.043,0.06	0.004	chr6:58685821-58689539(+)	chr6:58685821-58689555(+)
ENSMUSG00000002833	Hdgfl2	chr17	+	56096820	56097016	56096847	56097016	56096204	56096276	3010	18216875	19617271	52233111	79299208	177	150	0.00296047	0.0623193	0.44,0.453,0.472	0.358,0.398,0.311	0.099	chr17:56096276-56096821(+)	chr17:56096276-56096848(+)
ENSMUSG00000002833	Hdgfl2	chr17	+	56096820	56097016	56096850	56097016	56096204	56096276	3011	20618282	16143	58254127	81321	180	150	0.166576	0.710426	0.915,0.915,0.958	0.858,0.942,0.834	0.051	chr17:56096276-56096821(+)	chr17:56096276-56096851(+)
ENSMUSG00000002833	Hdgfl2	chr17	+	56096847	56097016	56096850	56097016	56096204	56096276	3012	22018678	16143	85320224	81321	153	150	0.939023	1	0.931,0.929,0.962	0.912,0.96,0.913	0.012	chr17:56096276-56096848(+)	chr17:56096276-56096851(+)
ENSMUSG00000002833	Hdgfl2	chr17	+	56100344	56100592	56100347	56100592	56099858	56099985	3014	478397184	20117054	172635422	66271133	153	150	0.740788	1	0.7,0.696,0.77	0.719,0.697,0.757	-0.002	chr17:56099985-56100345(+)	chr17:56099985-56100348(+)
ENSMUSG00000000399	Ndufa9	chr6	-	126844790	126845029	126844790	126844961	126849063	126849125	3015	143	809647348	70	2541216773	218	150	1	1	0.001,0.004,0.006	0.0,0.004,0.0	0.002	chr6:126845029-126849064(-)	chr6:126844961-126849064(-)
ENSMUSG00000051278	Zgrf1	chr3	+	127594459	127596022	127595878	127596022	127589968	127590108	3016	555012	686823	145517	188843	300	150	0.250043	0.865344	0.288,0.269,0.207	0.28,0.238,0.165	0.027	chr3:127590108-127594460(+)	chr3:127590108-127595879(+)
ENSMUSG00000040532	Abhd11	chr5	+	135011209	135011380	135011240	135011380	135010886	135011060	3017	788445306	17176	2641250683	4357	181	150	0.338247	0.992957	0.975,0.956,0.977	0.982,0.967,0.988	-0.01	chr5:135011060-135011210(+)	chr5:135011060-135011241(+)
ENSMUSG00000025932	Eya1	chr1	-	14270704	14270842	14270704	14270827	14274064	14274210	3018	382122	11152	62918	21510	165	150	0.281174	0.902732	0.758,0.56,0.909	0.732,0.637,0.621	0.079	chr1:14270842-14274065(-)	chr1:14270827-14274065(-)
ENSMUSG00000025932	Eya1	chr1	-	14274064	14274207	14274064	14274143	14274533	14274603	3019	597029	20	185235	20	214	150	1	1	1.0,0.961,1.0	1.0,0.948,1.0	0.004	chr1:14274207-14274534(-)	chr1:14274143-14274534(-)
ENSMUSG00000025932	Eya1	chr1	-	14274064	14274210	14274064	14274143	14274533	14274603	3020	685419	20	165436	20	217	150	1	1	1.0,0.949,1.0	1.0,0.949,1.0	0	chr1:14274210-14274534(-)	chr1:14274143-14274534(-)
ENSMUSG00000025932	Eya1	chr1	-	14274064	14274210	14274064	14274207	14274533	14274603	3021	29122	202812	62215	82014	153	150	0.186257	0.742599	0.587,0.296,0.14	0.424,0.519,0.512	-0.144	chr1:14274210-14274534(-)	chr1:14274207-14274534(-)
ENSMUSG00000063362	Alg11	chr8	+	22064999	22065931	22065125	22065931	22061885	22062116	3022	24015273	620	77349151	250	276	150	0.560579	1	0.956,0.976,1.0	0.954,0.974,1.0	0.001	chr8:22062116-22065000(+)	chr8:22062116-22065126(+)
ENSMUSG00000046311	Zfp62	chr11	+	49214525	49214654	49214554	49214654	49213589	49213642	3023	994	220	2168	5105	179	150	0.00238444	0.0547111	0.79,0.79,1.0	0.251,0.573,0.573	0.394	chr11:49213642-49214526(+)	chr11:49213642-49214555(+)
ENSMUSG00000042249	Grk3	chr5	-	112969167	112969308	112969167	112969269	112973506	112973580	3024	23419861	18116558	48207100	74304138	189	150	1.4174e-05	0.00175796	0.506,0.488,0.455	0.34,0.351,0.365	0.131	chr5:112969308-112973507(-)	chr5:112969269-112973507(-)
ENSMUSG00000037913	Tmem156	chr5	-	65075562	65075823	65075562	65075736	65079921	65080086	3027	390281135	2396	122404241	6254	237	150	0.856702	1	0.915,0.952,0.934	0.928,0.911,0.974	-0.004	chr5:65075823-65079922(-)	chr5:65075736-65079922(-)
ENSMUSG00000037913	Tmem156	chr5	-	65079921	65080191	65079921	65080086	65091358	65091425	3028	1187161	10130	36170112	4135	255	150	0.586623	1	0.874,0.763,1.0	0.841,0.885,0.929	-0.006	chr5:65080191-65091359(-)	chr5:65080086-65091359(-)
ENSMUSG00000027206	Cops2	chr2	-	125842621	125842732	125842621	125842711	125844809	125844935	3031	22713344	503336115	69354122	151757307	171	150	0.624063	1	0.284,0.258,0.251	0.286,0.291,0.258	-0.014	chr2:125842732-125844810(-)	chr2:125842711-125844810(-)
ENSMUSG00000068040	Tm9sf4	chr2	+	153198349	153198433	153198353	153198433	153195489	153195565	3034	482347160	941	185659443	4141	154	150	0.781739	1	0.981,0.988,0.994	0.978,0.979,0.998	0.003	chr2:153195565-153198350(+)	chr2:153195565-153198354(+)
ENSMUSG00000041238	Rbbp8	chr18	+	11720509	11720657	11720544	11720657	11718832	11718930	3036	14179	365249107	53420	85493290	185	150	0.377064	1	0.03,0.052,0.064	0.046,0.053,0.053	-0.002	chr18:11718930-11720510(+)	chr18:11718930-11720545(+)
ENSMUSG00000027709	Mccc1	chr3	-	35964326	35964480	35964326	35964464	35968423	35968473	3037	402	14010452	62	4915793	166	150	0.56297	1	0.025,0.0,0.034	0.0,0.033,0.019	0.002	chr3:35964480-35968424(-)	chr3:35964464-35968424(-)
ENSMUSG00000029167	Ppargc1a	chr5	-	51490016	51490121	51490016	51490090	51490199	51490245	3038	0	20	40	200	181	150	1	1	NA,0.0,NA	0.0,1.0,NA	-0.5	chr5:51490121-51490200(-)	chr5:51490090-51490200(-)
ENSMUSG00000027953	Slc50a1	chr3	-	89269049	89269298	89269049	89269211	89269826	89270139	3039	555326	308199122	249363	94480223	237	150	0.608279	1	0.102,0.144,0.119	0.139,0.109,0.152	-0.012	chr3:89269298-89269827(-)	chr3:89269211-89269827(-)
ENSMUSG00000018398	Sept8	chr11	+	53534948	53535135	53534954	53535135	53534432	53534628	3044	18026849	1038423	88250215	4112271	156	150	0.898572	1	0.627,0.754,0.672	0.674,0.663,0.744	-0.009	chr11:53534628-53534949(+)	chr11:53534628-53534955(+)
ENSMUSG00000026096	Osgepl1	chr1	+	53317901	53318289	53317906	53318289	53314855	53315099	3048	876441	1980	2616786	5133	155	150	0.127419	0.608206	0.816,0.886,1.0	0.834,0.926,0.965	-0.008	chr1:53315099-53317902(+)	chr1:53315099-53317907(+)
ENSMUSG00000026790	Odf2	chr2	+	29893000	29893154	29893037	29893154	29892185	29892276	3049	720479216	272411	2881025602	84425	187	150	0.648938	1	0.955,0.941,0.94	0.967,0.949,0.951	-0.01	chr2:29892276-29893001(+)	chr2:29892276-29893038(+)
ENSMUSG00000026790	Odf2	chr2	+	29912565	29912640	29912568	29912640	29903975	29904107	3050	1126246	640537311	249963	218895484	153	150	0.097678	0.52984	0.146,0.102,0.127	0.097,0.098,0.113	0.022	chr2:29904107-29912566(+)	chr2:29904107-29912569(+)
ENSMUSG00000078656	Vps25	chr11	+	101254918	101254996	101254942	101254996	101254030	101254176	3051	18198	1258792464	112718	40918551091	174	150	0.854704	1	0.012,0.02,0.015	0.023,0.012,0.014	-0.001	chr11:101254176-101254919(+)	chr11:101254176-101254943(+)
ENSMUSG00000026153	Fam135a	chr1	-	24028199	24030528	24028199	24029940	24030741	24030896	3052	1835	600	1156	0	300	150	0.00319112	0.0653752	0.6,1.0,1.0	1.0,1.0,1.0	-0.133	chr1:24030528-24030742(-)	chr1:24029940-24030742(-)
ENSMUSG00000039431	Mtmr7	chr8	-	40554270	40554601	40554270	40554397	40555775	40555916	3059	0	2	22	0	300	150	1	1	NA,NA,0.0	NA,1.0,1.0	-1	chr8:40554601-40555776(-)	chr8:40554397-40555776(-)
ENSMUSG00000053730	Tmem39b	chr4	-	129692432	129692673	129692432	129692516	129693065	129693285	3060	222314	16911876	2334	87232154	300	150	0.00178642	0.0445536	0.061,0.089,0.084	0.011,0.066,0.013	0.048	chr4:129692673-129693066(-)	chr4:129692516-129693066(-)
ENSMUSG00000032680	6820408C15Rik	chr2	+	152434032	152434148	152434035	152434148	152428924	152429024	3061	0	10	10	0	153	150	1	1	NA,0.0,NA	NA,1.0,NA	-1	chr2:152429024-152434033(+)	chr2:152429024-152434036(+)
ENSMUSG00000031362	Xlr4c	chrX	-	73242067	73242195	73242067	73242182	73242577	73242660	3062	424	2	385	20	163	150	1	1	1.0,1.0,0.648	1.0,0.786,1.0	-0.046	chrX:73242195-73242578(-)	chrX:73242182-73242578(-)
ENSMUSG00000031362	Xlr4c	chrX	-	73242067	73242195	73242067	73242182	73242613	73242660	3063	612	0	283	20	163	150	1	1	1.0,1.0,1.0	1.0,0.786,1.0	0.071	chrX:73242195-73242614(-)	chrX:73242182-73242614(-)
ENSMUSG00000059540	Tcea2	chr2	+	181685776	181685922	181685791	181685922	181684442	181684533	3064	541	916338	76	3213365	165	150	0.643104	1	0.048,0.055,0.023	0.0,0.046,0.077	0.001	chr2:181684533-181685777(+)	chr2:181684533-181685792(+)
ENSMUSG00000042185	Nfrkb	chr9	+	31396793	31397137	31396999	31397137	31396322	31396497	3066	10710943	766228	2312071	357836	300	150	0.48936	1	0.413,0.468,0.434	0.247,0.435,0.497	0.045	chr9:31396497-31396794(+)	chr9:31396497-31397000(+)
ENSMUSG00000042185	Nfrkb	chr9	+	31396793	31397137	31397035	31397137	31396322	31396497	3067	12411950	333017	38131100	1211858	300	150	0.00269747	0.0595129	0.653,0.665,0.595	0.613,0.357,0.463	0.16	chr9:31396497-31396794(+)	chr9:31396497-31397036(+)
ENSMUSG00000042185	Nfrkb	chr9	+	31396999	31397137	31397035	31397137	31396322	31396497	3068	1169638	333017	5411082	1211858	186	150	0.0638352	0.412591	0.739,0.721,0.643	0.784,0.429,0.533	0.119	chr9:31396497-31397000(+)	chr9:31396497-31397036(+)
ENSMUSG00000041408	Wapl	chr14	+	34694986	34695105	34695004	34695105	34691681	34692734	3072	990816338	252200115	4141444826	84311168	168	150	0.0144972	0.172351	0.778,0.785,0.724	0.815,0.806,0.814	-0.049	chr14:34692734-34694987(+)	chr14:34692734-34695005(+)
ENSMUSG00000030084	Plxna1	chr6	-	89322730	89322921	89322730	89322855	89323235	89323332	3074	593315	2	175148	0	216	150	1	1	1.0,1.0,0.839	1.0,1.0,1.0	-0.054	chr6:89322921-89323236(-)	chr6:89322855-89323236(-)
ENSMUSG00000052563	D930048N14Rik	chr11	+	51653991	51654113	51654010	51654113	51653733	51653871	3076	100	421	240	0	169	150	1	1	0.182,0.0,0.0	1.0,1.0,NA	-0.939	chr11:51653871-51653992(+)	chr11:51653871-51654011(+)
ENSMUSG00000038533	Cbfa2t2	chr2	+	154531221	154531412	154531224	154531412	154528836	154528905	3082	21013555	654214	74224150	155434	153	150	0.113634	0.571345	0.76,0.759,0.794	0.829,0.803,0.812	-0.044	chr2:154528905-154531222(+)	chr2:154528905-154531225(+)
ENSMUSG00000028952	Zbtb48	chr4	-	152020543	152020708	152020543	152020704	152020778	152020915	3085	929526	383	2610056	51	154	150	0.0657821	0.419969	0.968,0.92,0.894	1.0,0.951,0.982	-0.05	chr4:152020708-152020779(-)	chr4:152020704-152020779(-)
ENSMUSG00000028952	Zbtb48	chr4	-	152022026	152022234	152022026	152022119	152022695	152022807	3086	947339	725613	3210768	145038	265	150	0.338824	0.992957	0.425,0.425,0.629	0.564,0.548,0.503	-0.045	chr4:152022234-152022696(-)	chr4:152022119-152022696(-)
ENSMUSG00000057594	Arl16	chr11	-	120466653	120466767	120466653	120466732	120467181	120467240	3087	1157149	845	53209110	2187	185	150	0.767847	1	0.921,0.935,0.888	0.956,0.904,0.927	-0.014	chr11:120466767-120467182(-)	chr11:120466732-120467182(-)
ENSMUSG00000021123	Rdh12	chr12	+	79212652	79212757	79212688	79212757	79211387	79211543	3089	1749571	521	57252145	24	186	150	0.288118	0.917539	0.966,0.975,0.983	1.0,0.99,0.967	-0.011	chr12:79211543-79212653(+)	chr12:79211543-79212689(+)
ENSMUSG00000058135	Gstm1	chr3	-	108014944	108015118	108014944	108015040	108016327	108016428	3090	12912282	503242671828	64205128	222682984007	228	150	0.389316	1	0.017,0.018,0.029	0.019,0.016,0.021	0.003	chr3:108015118-108016328(-)	chr3:108015040-108016328(-)
ENSMUSG00000058135	Gstm1	chr3	-	108014944	108015145	108014944	108015040	108016327	108016428	3091	12113363	503242671828	56154103	222682984007	255	150	0.0288373	0.260522	0.014,0.018,0.02	0.015,0.011,0.015	0.004	chr3:108015145-108016328(-)	chr3:108015040-108016328(-)
ENSMUSG00000058135	Gstm1	chr3	-	108014944	108015145	108014944	108015118	108016327	108016428	3092	232612	311331	152819	237944	177	150	0.0890124	0.503672	0.386,0.629,0.247	0.356,0.231,0.268	0.136	chr3:108015145-108016328(-)	chr3:108015118-108016328(-)
ENSMUSG00000053091	Lins1	chr7	+	66710158	66710746	66710229	66710746	66709293	66709435	3095	502720	222610	149938	13831	221	150	0.314828	0.95869	0.607,0.413,0.576	0.905,0.639,0.454	-0.134	chr7:66709435-66710159(+)	chr7:66709435-66710230(+)
ENSMUSG00000028644	Ermap	chr4	-	119188175	119188334	119188175	119188321	119188858	119188943	3099	311	386414	58	275669	163	150	0.0936288	0.51829	0.068,0.014,0.062	0.0,0.076,0.096	-0.009	chr4:119188334-119188859(-)	chr4:119188321-119188859(-)
ENSMUSG00000078427	Sarnp	chr10	+	128838443	128838490	128838446	128838490	128833311	128833411	3101	14571004537	542337169	52822381396	177645392	153	150	0.141251	0.642541	0.725,0.745,0.757	0.745,0.773,0.777	-0.023	chr10:128833411-128838444(+)	chr10:128833411-128838447(+)
ENSMUSG00000038241	Cep250	chr2	+	155968754	155968862	155968757	155968862	155967557	155967654	3103	21413170	10	60239117	35	153	150	0.820365	1	1.0,0.992,1.0	1.0,0.987,0.958	0.016	chr2:155967654-155968755(+)	chr2:155967654-155968758(+)
ENSMUSG00000038241	Cep250	chr2	+	155974249	155974483	155974252	155974483	155973342	155973489	3104	342015	1178352	53819	2815465	153	150	0.696349	1	0.222,0.191,0.22	0.149,0.195,0.223	0.022	chr2:155973489-155974250(+)	chr2:155973489-155974253(+)
ENSMUSG00000002804	Nudt14	chr12	-	112938355	112938593	112938355	112938557	112938794	112938859	3109	19412657	271911	70267130	94529	186	150	0.422868	1	0.853,0.842,0.807	0.862,0.827,0.783	0.01	chr12:112938593-112938795(-)	chr12:112938557-112938795(-)
ENSMUSG00000027333	Smox	chr2	+	131516197	131516443	131516216	131516443	131511983	131512217	3110	20	754417	0	1410057	169	150	1	1	0.0,0.039,0.0	0.0,0.0,0.0	0.013	chr2:131512217-131516198(+)	chr2:131512217-131516217(+)
ENSMUSG00000027333	Smox	chr2	+	131520411	131521171	131521054	131521171	131520094	131520268	3112	1039041	0	42124103	12	300	150	1	1	1.0,1.0,1.0	1.0,0.984,0.963	0.018	chr2:131520268-131520412(+)	chr2:131520268-131521055(+)
ENSMUSG00000027333	Smox	chr2	+	131520921	131521171	131521054	131521171	131520094	131520268	3113	444716	0	244845	12	283	150	0.283026	0.906353	1.0,1.0,1.0	1.0,0.962,0.923	0.038	chr2:131520268-131520922(+)	chr2:131520268-131521055(+)
ENSMUSG00000029283	Cdc7	chr5	+	106974600	106975660	106975484	106975660	106973776	106974020	3118	297255112	554830	76360242	3514044	300	150	0.043634	0.334284	0.73,0.726,0.651	0.521,0.562,0.733	0.097	chr5:106974020-106974601(+)	chr5:106974020-106975485(+)
ENSMUSG00000029283	Cdc7	chr5	+	106979294	106979444	106979315	106979444	106976629	106976712	3119	20819599	732	85263177	252	171	150	0.418634	1	0.963,0.983,0.977	0.974,0.979,0.987	-0.006	chr5:106976712-106979295(+)	chr5:106976712-106979316(+)
ENSMUSG00000089824	Rbm12	chr2	-	156103348	156103429	156103348	156103397	156111785	156111956	3123	424255139	1619562	134547321	39223119	182	150	0.656706	1	0.685,0.689,0.649	0.739,0.669,0.69	-0.025	chr2:156103429-156111786(-)	chr2:156103397-156111786(-)
ENSMUSG00000027620	Rbm39	chr2	-	156154238	156154289	156154238	156154271	156158399	156158477	3124	13791015431	1115874374	3411511951	2791284792	168	150	0.921239	1	0.525,0.509,0.507	0.522,0.512,0.517	-0.003	chr2:156154289-156158400(-)	chr2:156154271-156158400(-)
ENSMUSG00000027620	Rbm39	chr2	-	156167537	156167591	156167537	156167588	156167684	156167750	3125	317424851135	18314072	87138312425	75214150	153	150	0.418267	1	0.944,0.946,0.939	0.919,0.946,0.941	0.008	chr2:156167591-156167685(-)	chr2:156167588-156167685(-)
ENSMUSG00000010721	Lmbr1	chr5	-	29323801	29323905	29323801	29323824	29346766	29346906	3126	663818	20	238051	20	231	150	1	1	1.0,0.925,1.0	1.0,0.963,1.0	-0.013	chr5:29323905-29346767(-)	chr5:29323824-29346767(-)
ENSMUSG00000031568	Rwdd4a	chr8	+	47542691	47542801	47542695	47542801	47537278	47537359	3128	455317150	3123	152677347	5218	154	150	0.152398	0.673754	0.993,0.963,0.98	0.967,0.969,0.977	0.008	chr8:47537359-47542692(+)	chr8:47537359-47542696(+)
ENSMUSG00000027655	Dhx35	chr2	+	158806397	158806490	158806402	158806490	158801374	158801508	3129	20016764	60	63258189	2	155	150	0.911314	1	1.0,0.964,1.0	1.0,1.0,0.989	-0.008	chr2:158801508-158806398(+)	chr2:158801508-158806403(+)
ENSMUSG00000027655	Dhx35	chr2	+	158815409	158815534	158815429	158815534	158806922	158807000	3130	31174	17813964	102319	57224121	170	150	0.891548	1	0.133,0.097,0.052	0.134,0.083,0.122	-0.019	chr2:158807000-158815410(+)	chr2:158807000-158815430(+)
ENSMUSG00000000339	Rtca	chr3	-	116504344	116504468	116504344	116504446	116506834	116506978	3131	452276154	11189	138664352	122812	172	150	0.799654	1	0.973,0.93,0.937	0.909,0.954,0.962	0.005	chr3:116504468-116506835(-)	chr3:116504446-116506835(-)
ENSMUSG00000000339	Rtca	chr3	-	116506834	116506993	116506834	116506978	116507750	116507851	3132	14102	351191119	588	108480287	165	150	0.127687	0.608206	0.035,0.045,0.015	0.04,0.015,0.025	0.005	chr3:116506993-116507751(-)	chr3:116506978-116507751(-)
ENSMUSG00000057133	Chd6	chr2	-	161041984	161042132	161041984	161042129	161052387	161052905	3134	19721759	565411	54258151	246044	153	150	0.466452	1	0.775,0.798,0.84	0.688,0.808,0.771	0.049	chr2:161042132-161052388(-)	chr2:161042129-161052388(-)
ENSMUSG00000029518	Rab35	chr5	+	115640079	115640203	115640083	115640203	115637715	115637766	3135	343266119	2110	121531334	113	154	150	0.678077	1	0.994,0.959,1.0	1.0,0.998,0.962	-0.002	chr5:115637766-115640080(+)	chr5:115637766-115640084(+)
ENSMUSG00000040351	Ankib1	chr5	-	3694778	3694893	3694778	3694875	3700355	3700407	3138	19912493	30243	64285155	63414	168	150	0.383463	1	0.856,0.822,0.965	0.905,0.882,0.908	-0.017	chr5:3694893-3700356(-)	chr5:3694875-3700356(-)
ENSMUSG00000021097	Clmn	chr12	-	104773772	104773898	104773772	104773843	104774488	104774549	3139	0	203	10	0	205	150	1	1	0.0,NA,0.0	NA,1.0,NA	-1	chr12:104773898-104774489(-)	chr12:104773843-104774489(-)
ENSMUSG00000053483	Usp21	chr1	-	171285254	171285384	171285254	171285375	171285541	171285601	3144	120	13313064	14	5422595	159	150	1	1	0.007,0.014,0.0	0.0,0.004,0.038	-0.007	chr1:171285384-171285542(-)	chr1:171285375-171285542(-)
ENSMUSG00000068551	Zfp467	chr6	-	48436612	48439454	48436612	48439357	48441946	48442060	3149	626625	442	125752	41	247	150	0.185202	0.740326	0.904,0.909,0.884	1.0,0.896,0.969	-0.056	chr6:48439454-48441947(-)	chr6:48439357-48441947(-)
ENSMUSG00000025665	Rps6ka6	chrX	-	111400207	111400284	111400207	111400269	111404677	111404839	3150	0	320	22	20	165	150	1	1	0.0,0.0,NA	NA,0.476,1.0	-0.738	chrX:111400284-111404678(-)	chrX:111400269-111404678(-)
ENSMUSG00000025764	Jade1	chr3	+	41593766	41593954	41593802	41593954	41591682	41591840	3152	610436216	162	175881505	225	186	150	1	1	0.998,0.983,0.989	0.986,0.997,0.988	0	chr3:41591840-41593767(+)	chr3:41591840-41593803(+)
ENSMUSG00000021548	Ccnh	chr13	+	85197350	85197561	85197530	85197561	85196251	85196325	3155	13641106465	552822	48521861139	255933	300	150	0.448942	1	0.925,0.952,0.914	0.907,0.949,0.945	-0.003	chr13:85196325-85197351(+)	chr13:85196325-85197531(+)
ENSMUSG00000021548	Ccnh	chr13	+	85202332	85202496	85202440	85202496	85197350	85197561	3157	1247915393	887332	45619081126	3011964	258	150	0.106465	0.553932	0.892,0.879,0.877	0.898,0.903,0.911	-0.021	chr13:85197561-85202333(+)	chr13:85197561-85202441(+)
ENSMUSG00000003581	Rnf215	chr11	+	4137211	4137368	4137308	4137368	4136711	4136797	3158	633532	620	3611368	120	247	150	0.00988188	0.138474	0.864,0.914,1.0	0.956,0.972,1.0	-0.05	chr11:4136797-4137212(+)	chr11:4136797-4137309(+)
ENSMUSG00000039671	Zmynd8	chr2	-	165846020	165846239	165846020	165846164	165851999	165852148	3161	317379133	339316153	106503236	94433226	225	150	0.381682	1	0.384,0.444,0.367	0.429,0.436,0.41	-0.027	chr2:165846239-165852000(-)	chr2:165846164-165852000(-)
ENSMUSG00000006050	Sra1	chr18	-	36667790	36667899	36667790	36667893	36668651	36668848	3163	510348187	133	192697438	44	156	150	1	1	0.998,0.991,0.984	1.0,0.994,0.991	-0.004	chr18:36667899-36668652(-)	chr18:36667893-36668652(-)
ENSMUSG00000021901	Bap1	chr14	+	31257288	31257767	31257625	31257767	31256660	31256791	3164	811604292	29277	2771188693	54628	300	150	0.920244	1	0.933,0.918,0.954	0.965,0.928,0.925	-0.004	chr14:31256791-31257289(+)	chr14:31256791-31257626(+)
ENSMUSG00000027678	Ncoa3	chr2	+	166068328	166068548	166068331	166068548	166067561	166067645	3166	17411458	13411652	56199107	4315391	153	150	0.473159	1	0.56,0.491,0.522	0.561,0.56,0.535	-0.028	chr2:166067645-166068329(+)	chr2:166067645-166068332(+)
ENSMUSG00000001054	Rmnd5b	chr11	-	51624474	51624646	51624474	51624577	51625668	51625834	3167	1084	265161113	6349	94337201	219	150	0.0132635	0.163619	0.025,0.033,0.024	0.042,0.065,0.03	-0.018	chr11:51624646-51625669(-)	chr11:51624577-51625669(-)
ENSMUSG00000002718	Cse1l	chr2	+	166929784	166929987	166929894	166929987	166928957	166929023	3168	20171406732	1696	67729591666	174	260	150	0.531038	1	0.986,0.989,0.986	1.0,0.99,0.996	-0.008	chr2:166929023-166929785(+)	chr2:166929023-166929895(+)
ENSMUSG00000026074	Map4k4	chr1	+	40000530	40000749	40000623	40000749	39999887	39999974	3173	21914396	1468037	57273114	35155115	243	150	0.171046	0.719035	0.481,0.525,0.616	0.501,0.521,0.38	0.073	chr1:39999974-40000531(+)	chr1:39999974-40000624(+)
ENSMUSG00000026074	Map4k4	chr1	+	40003756	40003987	40003762	40003987	40000530	40000749	3174	192720	10	55119	20	156	150	1	1	1.0,0.963,1.0	1.0,0.961,1.0	0.001	chr1:40000749-40003757(+)	chr1:40000749-40003763(+)
ENSMUSG00000026074	Map4k4	chr1	+	40006670	40006822	40006673	40006822	40004806	40004913	3176	22817264	25195	81269141	112822	153	150	0.403686	1	0.899,0.899,0.926	0.878,0.904,0.863	0.026	chr1:40004913-40006671(+)	chr1:40004913-40006674(+)
ENSMUSG00000017740	Slc12a5	chr2	+	164974415	164974579	164974447	164974579	164973686	164973781	3180	70	1352	0	374	182	150	0.0112217	0.147555	0.0,0.536,0.0	0.0,0.0,0.0	0.179	chr2:164973781-164974416(+)	chr2:164973781-164974448(+)
ENSMUSG00000026342	Slc35f5	chr1	+	125589810	125589965	125589838	125589965	125587364	125587455	3184	11711050	41	4019191	246	178	150	0.0659325	0.419969	1.0,0.959,0.977	0.944,0.976,0.927	0.03	chr1:125587455-125589811(+)	chr1:125587455-125589839(+)
ENSMUSG00000025266	Gnl3l	chrX	-	151014020	151014150	151014020	151014089	151017200	151017322	3186	333713	343201142	224230	101467278	211	150	0.775492	1	0.064,0.116,0.061	0.134,0.06,0.071	-0.008	chrX:151014150-151017201(-)	chrX:151014089-151017201(-)
ENSMUSG00000026171	Rnf25	chr1	-	74595208	74595301	74595208	74595298	74595630	74595768	3189	16814173	522534	64288155	236252	153	150	0.808269	1	0.76,0.847,0.678	0.732,0.82,0.745	-0.004	chr1:74595301-74595631(-)	chr1:74595298-74595631(-)
ENSMUSG00000026171	Rnf25	chr1	-	74598692	74598845	74598692	74598792	74599065	74599140	3190	22335	18615175	52517	54332167	203	150	0.0218232	0.221737	0.08,0.139,0.047	0.064,0.053,0.07	0.026	chr1:74598845-74599066(-)	chr1:74598792-74599066(-)
ENSMUSG00000028944	Prkag2	chr5	-	24889081	24889188	24889081	24889185	24908322	24908392	3195	704921	1336859	179442	44169111	153	150	0.485366	1	0.34,0.414,0.259	0.275,0.353,0.271	0.038	chr5:24889188-24908323(-)	chr5:24889185-24908323(-)
ENSMUSG00000039844	Rapgef1	chr2	+	29733419	29733762	29733576	29733762	29732826	29732919	3197	21254	471308159	7357	118592431	300	150	0.334218	0.986319	0.022,0.039,0.012	0.029,0.029,0.008	0.002	chr2:29732919-29733420(+)	chr2:29732919-29733577(+)
ENSMUSG00000078902	Gm14443	chr2	-	175166254	175170460	175166254	175167159	175171594	175171655	3198	604	20	281	30	300	150	0.843639	1	1.0,0.0,1.0	1.0,0.571,1.0	-0.19	chr2:175170460-175171595(-)	chr2:175167159-175171595(-)
ENSMUSG00000022562	Oplah	chr15	-	76302381	76302494	76302381	76302439	76302630	76302769	3199	12105	200	5114	20	205	150	1	1	0.814,1.0,1.0	1.0,0.801,1.0	0.004	chr15:76302494-76302631(-)	chr15:76302439-76302631(-)
ENSMUSG00000025647	Shisa5	chr9	+	109051363	109051453	109051366	109051453	109040869	109041026	3200	1179037	266188104	39174110	98351187	153	150	0.270983	0.890232	0.301,0.319,0.259	0.281,0.327,0.366	-0.032	chr9:109041026-109051364(+)	chr9:109041026-109051367(+)
ENSMUSG00000027331	Knstrn	chr2	+	118830811	118830969	118830872	118830969	118828958	118829014	3209	494123	420	206633	20	211	150	0.0478876	0.352174	0.897,0.936,1.0	1.0,0.959,1.0	-0.042	chr2:118829014-118830812(+)	chr2:118829014-118830873(+)
ENSMUSG00000027552	E2f5	chr3	+	14600999	14601046	14601002	14601046	14588139	14588301	3211	100	372015	2	94937	153	150	1	1	0.026,0.0,0.0	0.0,0.0,0.05	-0.008	chr3:14588301-14601000(+)	chr3:14588301-14601003(+)
ENSMUSG00000039041	Adrm1	chr2	+	180175159	180175392	180175242	180175392	180174864	180174946	3214	990641418	420	2771424770	13	233	150	1	1	0.994,0.995,1.0	1.0,0.999,0.994	-0.001	chr2:180174946-180175160(+)	chr2:180174946-180175243(+)
ENSMUSG00000069045	Ddx3y	chrY	-	1282900	1282968	1282900	1282948	1284321	1284382	3216	550	3802640	307	1110316	170	150	1	1	0.011,0.016,NA	0.023,NA,0.019	-0.007	chrY:1282968-1284322(-)	chrY:1282948-1284322(-)
ENSMUSG00000027569	Mrgbp	chr2	+	180584693	180584871	180584796	180584871	180584405	180584487	3220	1628043	25817875	56210121	75341165	253	150	0.111989	0.569754	0.271,0.21,0.254	0.307,0.267,0.303	-0.047	chr2:180584487-180584694(+)	chr2:180584487-180584797(+)
ENSMUSG00000089917	Uckl1	chr2	-	181570132	181570195	181570132	181570180	181570308	181570402	3222	18215471	20	82272131	100	165	150	1	1	1.0,0.986,1.0	0.987,1.0,1.0	0	chr2:181570195-181570309(-)	chr2:181570180-181570309(-)
ENSMUSG00000000823	Zfp512b	chr2	-	181587980	181588103	181587980	181588079	181588213	181588306	3223	20186	20214878	91913	58284156	174	150	0.406756	1	0.079,0.095,0.062	0.118,0.055,0.067	-0.001	chr2:181588103-181588214(-)	chr2:181588079-181588214(-)
ENSMUSG00000036833	Pnpla7	chr2	+	24987113	24987199	24987118	24987199	24983489	24983649	3230	13133	265229104	6171	71275160	155	150	0.927337	1	0.045,0.052,0.027	0.076,0.056,0.006	-0.005	chr2:24983649-24987114(+)	chr2:24983649-24987119(+)
ENSMUSG00000026924	Sec16a	chr2	-	26416116	26416257	26416116	26416228	26416370	26416427	3233	333416	346279158	82815	110500210	179	150	0.00808478	0.124084	0.074,0.093,0.078	0.057,0.045,0.056	0.029	chr2:26416257-26416371(-)	chr2:26416228-26416371(-)
ENSMUSG00000021235	Coq6	chr12	+	84371403	84371558	84371450	84371558	84371107	84371170	3236	192212	15612048	11388	57227128	197	150	0.416967	1	0.085,0.122,0.16	0.128,0.113,0.045	0.027	chr12:84371170-84371404(+)	chr12:84371170-84371451(+)
ENSMUSG00000025283	Sat1	chrX	-	155213896	155213958	155213896	155213937	155214032	155214134	3237	26194	651487319	82820	2721228667	171	150	0.302805	0.944646	0.034,0.033,0.011	0.025,0.02,0.026	0.002	chrX:155213958-155214033(-)	chrX:155213937-155214033(-)
ENSMUSG00000006315	Tmem147	chr7	-	30727986	30728129	30727986	30728108	30728204	30728289	3238	794	16371092670	6197	55824721592	171	150	1	1	0.004,0.007,0.005	0.009,0.007,0.004	-0.001	chr7:30728129-30728205(-)	chr7:30728108-30728205(-)
ENSMUSG00000006315	Tmem147	chr7	-	30728656	30728741	30728656	30728716	30729201	30729271	3239	46198	1140723445	105825	39118061134	175	150	0.577946	1	0.033,0.022,0.015	0.021,0.027,0.019	0.001	chr7:30728741-30729202(-)	chr7:30728716-30729202(-)
ENSMUSG00000060279	Ap2a1	chr7	-	44909219	44909374	44909219	44909321	44909698	44909828	3241	24147	625408289	7338	251837484	203	150	0.637738	1	0.028,0.025,0.018	0.02,0.028,0.012	0.004	chr7:44909374-44909699(-)	chr7:44909321-44909699(-)
ENSMUSG00000003316	Glg1	chr8	-	111160620	111160810	111160620	111160741	111161425	111161533	3242	263923	622460221	115741	186687348	219	150	0.134021	0.619983	0.028,0.055,0.067	0.039,0.054,0.075	-0.006	chr8:111160810-111161426(-)	chr8:111160741-111161426(-)
ENSMUSG00000038671	Arfrp1	chr2	-	181364013	181364195	181364013	181364096	181364310	181364398	3243	13712469	283155112	45187107	114420235	249	150	0.0140477	0.168936	0.226,0.325,0.271	0.192,0.211,0.215	0.068	chr2:181364195-181364311(-)	chr2:181364096-181364311(-)
ENSMUSG00000021816	Ppp3cb	chr14	-	20509415	20509500	20509415	20509497	20515522	20515600	3245	499339167	493395182	160610355	194732376	153	150	0.497971	1	0.498,0.457,0.474	0.447,0.45,0.481	0.017	chr14:20509500-20515523(-)	chr14:20509497-20515523(-)
ENSMUSG00000039382	Wdr45	chrX	+	7725739	7726036	7725930	7726036	7724186	7724291	3250	525819	15012764	197529	54204131	300	150	0.279201	0.901023	0.148,0.186,0.129	0.15,0.155,0.1	0.019	chrX:7724291-7725740(+)	chrX:7724291-7725931(+)
ENSMUSG00000039382	Wdr45	chrX	+	7725857	7726036	7725930	7726036	7724186	7724291	3252	26296	15012764	132622	54204131	223	150	0.63689	1	0.104,0.133,0.059	0.139,0.079,0.101	-0.008	chrX:7724291-7725858(+)	chrX:7724291-7725931(+)
ENSMUSG00000039382	Wdr45	chrX	+	7725877	7726036	7725930	7726036	7724186	7724291	3253	23244	15012764	101917	54204131	203	150	0.376024	1	0.102,0.123,0.044	0.12,0.064,0.087	-0.001	chrX:7724291-7725878(+)	chrX:7724291-7725931(+)
ENSMUSG00000039382	Wdr45	chrX	+	7726197	7726292	7726248	7726292	7725930	7726036	3254	345288101	200	114417298	575	201	150	0.0102507	0.14298	0.992,1.0,1.0	0.944,0.978,0.978	0.031	chrX:7726036-7726198(+)	chrX:7726036-7726249(+)
ENSMUSG00000039382	Wdr45	chrX	+	7726877	7727086	7726967	7727086	7726685	7726765	3255	316306144	0	163523339	10	240	150	1	1	1.0,1.0,1.0	1.0,0.997,1.0	0.001	chrX:7726765-7726878(+)	chrX:7726765-7726968(+)
ENSMUSG00000039382	Wdr45	chrX	+	7727169	7727271	7727211	7727271	7726877	7727086	3257	30231396	5127	119511325	21516	192	150	0.872978	1	0.979,0.953,0.915	0.979,0.964,0.941	-0.012	chrX:7727086-7727170(+)	chrX:7727086-7727212(+)
ENSMUSG00000039382	Wdr45	chrX	+	7727181	7727271	7727211	7727271	7726877	7727086	3258	644517	5127	187732	21516	180	150	0.512147	1	0.914,0.758,0.669	0.882,0.811,0.625	0.008	chrX:7727086-7727182(+)	chrX:7727086-7727212(+)
ENSMUSG00000031156	Slc35a2	chrX	+	7892139	7892867	7892729	7892867	7889611	7889763	3260	269173110	140	76393207	1	300	150	0.653635	1	0.993,0.956,1.0	1.0,1.0,0.99	-0.014	chrX:7889763-7892140(+)	chrX:7889763-7892730(+)
ENSMUSG00000033467	Crlf2	chr5	-	109555506	109555660	109555506	109555627	109556018	109556181	3261	11910	13910659	83124	49292153	183	150	0.218927	0.80927	0.061,0.065,0.122	0.118,0.08,0.114	-0.021	chr5:109555660-109556019(-)	chr5:109555627-109556019(-)
ENSMUSG00000031167	Rbm3	chrX	-	8143246	8143332	8143246	8143329	8143657	8143751	3264	799242862615	831744402806	231993975972	2417101146326	153	150	0.913015	1	0.485,0.486,0.477	0.485,0.477,0.481	0.002	chrX:8143332-8143658(-)	chrX:8143329-8143658(-)
ENSMUSG00000008496	Pou2f2	chr7	-	25093484	25093686	25093484	25093550	25094789	25094856	3266	1287359	110	2717480	12	286	150	1	1	0.985,0.975,1.0	1.0,0.989,0.955	0.005	chr7:25093686-25094790(-)	chr7:25093550-25094790(-)
ENSMUSG00000008496	Pou2f2	chr7	-	25097653	25097815	25097653	25097767	25099951	25100043	3267	3495	724620	62413	1210023	198	150	0.924812	1	0.263,0.129,0.159	0.275,0.154,0.3	-0.059	chr7:25097815-25099952(-)	chr7:25097767-25099952(-)
ENSMUSG00000008496	Pou2f2	chr7	-	25116037	25116220	25116037	25116154	25120840	25120897	3268	464518	474529	25024	3113039	216	150	0.00111478	0.0334363	0.405,0.41,0.301	0.043,0.211,0.299	0.188	chr7:25116220-25120841(-)	chr7:25116154-25120841(-)
ENSMUSG00000038095	Sbno1	chr5	-	124410069	124410382	124410069	124410379	124413184	124413289	3269	24820884	655541	82364200	239047	153	150	0.198635	0.770449	0.789,0.788,0.668	0.778,0.799,0.807	-0.046	chr5:124410382-124413185(-)	chr5:124410379-124413185(-)
ENSMUSG00000038095	Sbno1	chr5	-	124410069	124410382	124410069	124410379	124414398	124414527	3270	507395186	15911334	132642344	50212117	153	150	0.068885	0.431849	0.758,0.774,0.843	0.721,0.748,0.742	0.055	chr5:124410382-124414399(-)	chr5:124410379-124414399(-)
ENSMUSG00000001911	Nfix	chr8	-	84726468	84726605	84726468	84726602	84727123	84727244	3271	302256102	534210	83454261	238840	153	150	0.222761	0.818454	0.848,0.857,0.909	0.78,0.835,0.865	0.045	chr8:84726605-84727124(-)	chr8:84726602-84727124(-)
ENSMUSG00000027947	Il6ra	chr3	-	89878848	89878895	89878848	89878892	89885901	89886043	3273	24218789	379248127	77322176	124411247	153	150	0.73373	1	0.385,0.425,0.407	0.378,0.434,0.411	-0.002	chr3:89878895-89885902(-)	chr3:89878892-89885902(-)
ENSMUSG00000042167	Tent2	chr13	-	93174639	93174718	93174639	93174706	93175518	93175610	3276	448321148	325174130	166735341	104420202	162	150	0.211636	0.796717	0.561,0.631,0.513	0.596,0.618,0.61	-0.04	chr13:93174718-93175519(-)	chr13:93174706-93175519(-)
ENSMUSG00000025473	Adam8	chr7	-	139986302	139986486	139986302	139986468	139986732	139986808	3280	733	843732	52	248863	168	150	0.06773	0.428707	0.069,0.068,0.077	0.0,0.048,0.028	0.046	chr7:139986486-139986733(-)	chr7:139986468-139986733(-)
ENSMUSG00000025473	Adam8	chr7	-	139991345	139991449	139991345	139991446	139992431	139992562	3282	261111	774249	82834	159242	153	150	0.0442316	0.336937	0.249,0.204,0.18	0.343,0.23,0.442	-0.127	chr7:139991449-139992432(-)	chr7:139991446-139992432(-)
ENSMUSG00000040859	Bsdc1	chr4	+	129466822	129466990	129466913	129466990	129465229	129465346	3284	419311162	891	161548380	21	241	150	0.00200535	0.0486906	0.97,0.956,0.99	1.0,0.994,0.996	-0.025	chr4:129465346-129466823(+)	chr4:129465346-129466914(+)
ENSMUSG00000036391	Sec24a	chr11	-	51729451	51729578	51729451	51729575	51731802	51731905	3285	1378158	461812	5518383	145727	153	150	0.532963	1	0.745,0.815,0.826	0.794,0.759,0.751	0.027	chr11:51729578-51731803(-)	chr11:51729575-51731803(-)
ENSMUSG00000015290	Ubl4a	chrX	-	74367700	74368010	74367700	74367909	74368152	74368258	3288	15137	637484259	42317	2451018629	251	150	0.83453	1	0.014,0.016,0.016	0.01,0.013,0.016	0.002	chrX:74368010-74368153(-)	chrX:74367909-74368153(-)
ENSMUSG00000034793	G6pc3	chr11	+	102192748	102193226	102193084	102193226	102192472	102192563	3289	837629328	106	2631227647	292	300	150	0.934911	1	0.998,1.0,0.965	0.985,0.986,0.994	-0.001	chr11:102192563-102192749(+)	chr11:102192563-102193085(+)
ENSMUSG00000052423	B4galt3	chr1	+	171271706	171272001	171271827	171272001	171271202	171271373	3290	325259175	553321	138531296	137726	271	150	0.242036	0.848513	0.766,0.813,0.822	0.855,0.792,0.863	-0.036	chr1:171271373-171271707(+)	chr1:171271373-171271828(+)
ENSMUSG00000052423	B4galt3	chr1	+	171271706	171272001	171271909	171272001	171271202	171271373	3291	490365211	0	171674434	120	300	150	1	1	1.0,1.0,1.0	0.988,0.994,1.0	0.006	chr1:171271373-171271707(+)	chr1:171271373-171271910(+)
ENSMUSG00000052423	B4galt3	chr1	+	171271827	171272001	171271909	171272001	171271202	171271373	3292	294223107	0	84396237	120	232	150	1	1	1.0,1.0,1.0	0.982,0.992,1.0	0.009	chr1:171271373-171271828(+)	chr1:171271373-171271910(+)
ENSMUSG00000036893	Ehmt1	chr2	-	24863771	24863908	24863771	24863905	24877454	24877626	3294	545392170	423816	131665347	164635	153	150	0.974883	1	0.927,0.91,0.912	0.889,0.934,0.907	0.006	chr2:24863908-24877455(-)	chr2:24863905-24877455(-)
ENSMUSG00000036893	Ehmt1	chr2	-	24863771	24863929	24863771	24863905	24877454	24877626	3295	978043	423816	4216275	164635	174	150	0.311078	0.952297	0.666,0.645,0.699	0.694,0.752,0.649	-0.028	chr2:24863929-24877455(-)	chr2:24863905-24877455(-)
ENSMUSG00000036893	Ehmt1	chr2	-	24863771	24863929	24863771	24863908	24877454	24877626	3296	927239	540384166	3715173	126654345	171	150	0.109501	0.563343	0.13,0.141,0.171	0.205,0.168,0.157	-0.029	chr2:24863929-24877455(-)	chr2:24863908-24877455(-)
ENSMUSG00000023262	Acy1	chr9	-	106435783	106436009	106435783	106435860	106436125	106436220	3298	664	19517188	3126	76379218	299	150	0.897905	1	0.015,0.017,0.022	0.019,0.016,0.014	0.002	chr9:106436009-106436126(-)	chr9:106435860-106436126(-)
ENSMUSG00000023262	Acy1	chr9	-	106436125	106436800	106436125	106436220	106436888	106436953	3299	24218371	2	71377258	420	300	150	0.899651	1	1.0,1.0,0.947	0.899,0.99,1.0	0.019	chr9:106436800-106436889(-)	chr9:106436220-106436889(-)
ENSMUSG00000023262	Acy1	chr9	-	106437628	106437737	106437628	106437733	106438132	106438319	3300	17310047	1026336	30232134	3016998	154	150	0.22509	0.82222	0.623,0.607,0.56	0.493,0.572,0.571	0.051	chr9:106437737-106438133(-)	chr9:106437733-106438133(-)
ENSMUSG00000026821	Ralgds	chr2	+	28542854	28542950	28542890	28542950	28542289	28542483	3301	513416	580	86127	1149	186	150	0.0738264	0.449324	0.892,0.774,1.0	0.866,0.778,0.708	0.105	chr2:28542483-28542855(+)	chr2:28542483-28542891(+)
ENSMUSG00000044876	Zfp444	chr7	+	6183789	6184202	6183861	6184202	6173981	6174101	3304	9204	696315	62615	2611973	222	150	0.946997	1	0.081,0.177,0.153	0.135,0.129,0.122	0.008	chr7:6174101-6183790(+)	chr7:6174101-6183862(+)
ENSMUSG00000029416	Slc15a4	chr5	-	127603780	127603851	127603780	127603798	127604110	127604188	3306	13311649	673	49153103	361	203	150	0.175911	0.729372	0.942,0.924,0.923	0.923,0.95,0.987	-0.024	chr5:127603851-127604111(-)	chr5:127603798-127604111(-)
ENSMUSG00000029416	Slc15a4	chr5	-	127604537	127604706	127604537	127604648	127608771	127609061	3307	29323694	1097538	113262234	3614661	208	150	0.864518	1	0.66,0.694,0.641	0.694,0.564,0.734	0.001	chr5:127604706-127608772(-)	chr5:127604648-127608772(-)
ENSMUSG00000022488	Nckap1l	chr15	+	103464505	103464662	103464545	103464662	103464365	103464414	3308	19981560727	142	56826541406	2	190	150	1	1	0.999,0.997,0.997	1.0,1.0,0.998	-0.002	chr15:103464414-103464506(+)	chr15:103464414-103464546(+)
ENSMUSG00000004880	Lbr	chr1	-	181821435	181821627	181821435	181821597	181825621	181825676	3309	18641197646	200	64426001416	31	180	150	1	1	0.999,1.0,1.0	1.0,0.999,0.999	0	chr1:181821627-181825622(-)	chr1:181821597-181825622(-)
ENSMUSG00000009555	Cdk9	chr2	-	32710476	32710791	32710476	32710567	32712030	32712112	3310	30823481	1292974542	122433276	44118301113	300	150	0.127325	0.608206	0.107,0.107,0.07	0.122,0.106,0.11	-0.018	chr2:32710791-32712031(-)	chr2:32710567-32712031(-)
ENSMUSG00000038593	Tctn1	chr5	-	122246484	122246634	122246484	122246571	122247919	122248045	3319	713421	0	204728	20	213	150	1	1	1.0,1.0,1.0	1.0,0.943,1.0	0.019	chr5:122246634-122247920(-)	chr5:122246571-122247920(-)
ENSMUSG00000035299	Mid1	chrX	+	169985896	169986097	169985935	169986097	169984998	169985142	3321	1001	120023	2127	7969	189	150	1	1	0.062,NA,0.033	1.0,0.108,0.075	-0.347	chrX:169985142-169985897(+)	chrX:169985142-169985936(+)
ENSMUSG00000066037	Hnrnpr	chr4	+	136314086	136314255	136314089	136314255	136310967	136311089	3322	20414779	22013558	49284160	59302186	153	150	0.170841	0.719035	0.476,0.516,0.572	0.449,0.48,0.458	0.059	chr4:136311089-136314087(+)	chr4:136311089-136314090(+)
ENSMUSG00000027882	Stxbp3	chr3	-	108826005	108826082	108826005	108826076	108827025	108827107	3323	23319093	20	80321174	0	156	150	1	1	1.0,0.989,1.0	1.0,1.0,1.0	-0.004	chr3:108826082-108827026(-)	chr3:108826076-108827026(-)
ENSMUSG00000027998	Plrg1	chr3	+	83070596	83070736	83070622	83070736	83069692	83069801	3324	672539266	120	2571060592	10	176	150	1	1	0.998,0.996,1.0	1.0,0.999,1.0	-0.002	chr3:83069801-83070597(+)	chr3:83069801-83070623(+)
ENSMUSG00000040479	Dgkz	chr2	-	91942627	91942814	91942627	91942684	91944021	91944099	3325	14610743	13611198577	3710276	43617351019	280	150	0.0205031	0.21049	0.054,0.046,0.038	0.043,0.031,0.038	0.009	chr2:91942814-91944022(-)	chr2:91942684-91944022(-)
ENSMUSG00000022390	Zc3h7b	chr15	+	81768983	81769181	81768998	81769181	81768832	81768866	3326	615469240	202	184754379	20	165	150	1	1	0.996,1.0,0.991	1.0,0.997,1.0	-0.003	chr15:81768866-81768984(+)	chr15:81768866-81768999(+)
ENSMUSG00000059689	Zfp637	chr6	+	117844982	117845955	117845024	117845955	117843252	117843392	3327	6193	12212156	41516	76207114	192	150	0.91845	1	0.037,0.109,0.04	0.039,0.054,0.099	-0.002	chr6:117843392-117844983(+)	chr6:117843392-117845025(+)
ENSMUSG00000027944	Hax1	chr3	-	89997386	89997574	89997386	89997565	89997737	89998003	3328	563384169	422815	198821548	225143	159	150	0.988775	1	0.927,0.928,0.914	0.895,0.938,0.923	0.004	chr3:89997574-89997738(-)	chr3:89997565-89997738(-)
ENSMUSG00000056394	Lig1	chr7	+	13286557	13286684	13286560	13286684	13285256	13285392	3329	17961365737	1223	61724391494	5213	153	150	1	1	0.993,0.999,0.996	0.992,0.991,0.998	0.002	chr7:13285392-13286558(+)	chr7:13285392-13286561(+)
ENSMUSG00000056394	Lig1	chr7	+	13289387	13289495	13289393	13289495	13288663	13288759	3330	767028	1105858403	3912044	3891576914	156	150	0.792928	1	0.062,0.073,0.063	0.088,0.068,0.044	-0.001	chr7:13288759-13289388(+)	chr7:13288759-13289394(+)
ENSMUSG00000021432	Slc35b3	chr13	-	38939874	38940045	38939874	38939972	38943058	38943166	3334	12118	635830	258	3614771	223	150	0.10189	0.541331	0.114,0.113,0.152	0.0,0.103,0.07	0.069	chr13:38940045-38943059(-)	chr13:38939972-38943059(-)
ENSMUSG00000044551	9930012K11Rik	chr14	-	70155849	70155956	70155849	70155953	70156160	70156276	3335	25113	5914	9329	21415	153	150	0.587953	1	0.831,0.545,0.174	0.815,0.691,0.37	-0.109	chr14:70155956-70156161(-)	chr14:70155953-70156161(-)
ENSMUSG00000032567	Aste1	chr9	+	105396797	105397858	105397624	105397858	105396544	105396705	3339	9910836	1	50165109	6	300	150	0.329645	0.978933	1.0,1.0,0.947	1.0,1.0,0.901	0.015	chr9:105396705-105396798(+)	chr9:105396705-105397625(+)
ENSMUSG00000019823	Mical1	chr10	+	41479325	41479499	41479394	41479499	41478962	41479067	3348	834532	18014080	368864	59237125	219	150	0.341082	0.994426	0.24,0.18,0.215	0.295,0.203,0.26	-0.041	chr10:41479067-41479326(+)	chr10:41479067-41479395(+)
ENSMUSG00000040363	Bcor	chrX	-	12048302	12048647	12048302	12048545	12048994	12049252	3349	27321299	294236125	155502265	85332193	252	150	1.67686e-06	0.000405005	0.356,0.348,0.32	0.52,0.474,0.45	-0.14	chrX:12048647-12048995(-)	chrX:12048545-12048995(-)
ENSMUSG00000031833	Mast3	chr8	-	70789847	70789920	70789847	70789917	70789996	70790085	3350	410274116	908250	111504306	3611763	153	150	0.182843	0.73819	0.817,0.766,0.695	0.751,0.809,0.826	-0.036	chr8:70789920-70789997(-)	chr8:70789917-70789997(-)
ENSMUSG00000062203	Gspt1	chr16	-	11238871	11239099	11238871	11239096	11240665	11240707	3352	1276844449	609410169	41117981104	216840495	153	150	0.588682	1	0.673,0.669,0.723	0.651,0.677,0.686	0.017	chr16:11239099-11240666(-)	chr16:11239096-11240666(-)
ENSMUSG00000025484	Bet1l	chr7	-	140854764	140854937	140854764	140854821	140855073	140855165	3356	44409	322245144	244244	112476271	266	150	0.878971	1	0.072,0.084,0.034	0.108,0.047,0.084	-0.016	chr7:140854937-140855074(-)	chr7:140854821-140855074(-)
ENSMUSG00000038324	Trpc4ap	chr2	-	155643391	155643468	155643391	155643450	155644927	155645059	3360	972	12681033511	2227	39417601052	168	150	1	1	0.006,0.006,0.003	0.005,0.011,0.006	-0.002	chr2:155643468-155644928(-)	chr2:155643450-155644928(-)
ENSMUSG00000038324	Trpc4ap	chr2	-	155650418	155650585	155650418	155650561	155653492	155653678	3361	1313893375	565321	3881781857	259944	174	150	0.538391	1	0.953,0.936,0.939	0.93,0.939,0.944	0.005	chr2:155650585-155653493(-)	chr2:155650561-155653493(-)
ENSMUSG00000006154	Eps8l1	chr7	+	4470182	4470432	4470282	4470432	4469880	4470042	3364	552	14599	132	124122	250	150	0.151438	0.670801	0.176,0.048,0.118	0.048,0.042,0.052	0.067	chr7:4470042-4470183(+)	chr7:4470042-4470283(+)
ENSMUSG00000036916	Zfp280c	chrX	-	48578379	48578556	48578379	48578529	48588702	48588749	3365	22512150	14410834	62220127	4516180	177	150	0.740131	1	0.57,0.487,0.555	0.539,0.537,0.574	-0.013	chrX:48578556-48588703(-)	chrX:48578529-48588703(-)
ENSMUSG00000029516	Cit	chr5	+	115981649	115981812	115981694	115981812	115979761	115979869	3368	956049	277209103	2313582	77300171	195	150	0.181236	0.737969	0.209,0.181,0.268	0.187,0.257,0.269	-0.018	chr5:115979869-115981650(+)	chr5:115979869-115981695(+)
ENSMUSG00000029516	Cit	chr5	+	116005781	116006091	116005784	116006091	115997673	115997853	3370	18211562	23616384	39223115	57277147	153	150	0.727528	1	0.431,0.409,0.42	0.401,0.441,0.434	-0.005	chr5:115997853-116005782(+)	chr5:115997853-116005785(+)
ENSMUSG00000022498	Txndc11	chr16	-	11128486	11128705	11128486	11128703	11134267	11134650	3372	592	274280109	732	103482226	152	150	0.226811	0.825078	0.018,0.031,0.018	0.063,0.006,0.009	-0.004	chr16:11128705-11134268(-)	chr16:11128703-11134268(-)
ENSMUSG00000038733	Wdr26	chr1	-	181203023	181203224	181203023	181203160	181209050	181209107	3376	845426	527413195	297040	195718453	214	150	0.0288017	0.260522	0.1,0.084,0.085	0.094,0.064,0.058	0.018	chr1:181203224-181209051(-)	chr1:181203160-181209051(-)
ENSMUSG00000040621	Gemin8	chrX	+	166180352	166180809	166180445	166180809	166178791	166178830	3377	21016872	621	62314182	130	243	150	0.0970471	0.527598	0.956,0.981,0.978	0.975,0.985,1.0	-0.015	chrX:166178830-166180353(+)	chrX:166178830-166180446(+)
ENSMUSG00000051736	Fam229b	chr10	-	39122176	39122335	39122176	39122332	39132246	39132378	3380	683	502	5117	20	153	150	0.00135604	0.0384128	0.541,1.0,0.595	1.0,0.844,1.0	-0.236	chr10:39122335-39132247(-)	chr10:39122332-39132247(-)
ENSMUSG00000027184	Caprin1	chr2	-	103773733	103773795	103773733	103773744	103775416	103775525	3382	577641942166	844	192379724623	264	201	150	1	1	0.998,0.999,0.998	0.999,0.999,0.999	-0.001	chr2:103773795-103775417(-)	chr2:103773744-103775417(-)
ENSMUSG00000041679	Lrrc29	chr8	-	105315075	105316068	105315075	105316022	105323264	105323366	3384	12256	12108	33016	5299	196	150	0.721794	1	0.434,0.657,0.365	0.315,0.442,0.576	0.041	chr8:105316068-105323265(-)	chr8:105316022-105323265(-)
ENSMUSG00000029673	Auts2	chr5	-	131474922	131475176	131474922	131475173	131476552	131477023	3385	1422	6114	710	44	153	150	1	1	0.696,0.151,0.329	NA,0.632,0.71	-0.279	chr5:131475176-131476553(-)	chr5:131475173-131476553(-)
ENSMUSG00000041264	Uspl1	chr5	+	149193839	149194440	149193897	149194440	149188344	149188473	3386	451342135	552	179578386	53113	208	150	3.04795e-05	0.00291397	0.985,0.98,0.98	0.963,0.931,0.955	0.032	chr5:149188473-149193840(+)	chr5:149188473-149193898(+)
ENSMUSG00000027012	Dync1i2	chr2	+	71262647	71263303	71262650	71263303	71260821	71260947	3388	804541280	28266	2471087615	154126	153	150	0.418661	1	0.966,0.953,0.979	0.942,0.963,0.959	0.011	chr2:71260947-71262648(+)	chr2:71260947-71262651(+)
ENSMUSG00000015149	Sirt2	chr7	+	28787916	28788660	28787919	28788660	28787761	28787828	3391	487429189	200	188725404	20	153	150	1	1	0.996,1.0,1.0	1.0,0.997,1.0	0	chr7:28787828-28787917(+)	chr7:28787828-28787920(+)
ENSMUSG00000030584	Dpf1	chr7	+	29314138	29314402	29314282	29314402	29313081	29313213	3392	592	1	391	0	294	150	1	1	1.0,1.0,0.505	1.0,1.0,1.0	-0.165	chr7:29313213-29314139(+)	chr7:29313213-29314283(+)
ENSMUSG00000030584	Dpf1	chr7	+	29316213	29316325	29316243	29316325	29315623	29315736	3393	0	82	30	53	180	150	1	1	NA,0.0,0.0	NA,0.333,0.0	-0.167	chr7:29315736-29316214(+)	chr7:29315736-29316244(+)
ENSMUSG00000037773	Pced1a	chr2	-	130422224	130422704	130422224	130422375	130422812	130422892	3402	16514657	19103	65268120	2135	300	150	0.0219943	0.221829	0.813,0.88,0.905	0.942,0.912,0.923	-0.06	chr2:130422704-130422813(-)	chr2:130422375-130422813(-)
ENSMUSG00000068329	Htra2	chr6	-	83052697	83052803	83052697	83052726	83053037	83053070	3405	1023772426	703823	4481737998	1814054	227	150	0.541244	1	0.906,0.931,0.924	0.943,0.891,0.924	0.001	chr6:83052803-83053038(-)	chr6:83052726-83053038(-)
ENSMUSG00000089682	Bcl2l2	chr14	+	54884373	54884813	54884624	54884813	54883796	54883884	3407	24522090	320	84356200	44	300	150	0.39849	1	0.976,0.982,1.0	1.0,0.978,0.962	0.006	chr14:54883884-54884374(+)	chr14:54883884-54884625(+)
ENSMUSG00000060601	Nr1h2	chr7	-	44551954	44552245	44551954	44552236	44552506	44552620	3409	295224134	23016287	156466278	107353206	159	150	0.923381	1	0.548,0.566,0.592	0.579,0.555,0.56	0.004	chr7:44552245-44552507(-)	chr7:44552236-44552507(-)
ENSMUSG00000060601	Nr1h2	chr7	-	44551954	44552343	44551954	44552236	44552506	44552620	3410	14711469	23016287	4716171	107353206	257	150	8.48448e-05	0.00581123	0.272,0.291,0.316	0.204,0.21,0.167	0.099	chr7:44552343-44552507(-)	chr7:44552236-44552507(-)
ENSMUSG00000060601	Nr1h2	chr7	-	44551954	44552343	44551954	44552245	44552506	44552620	3411	1128752	260195117	2311244	132415251	248	150	5.40797e-07	0.000155107	0.207,0.213,0.212	0.095,0.14,0.096	0.1	chr7:44552343-44552507(-)	chr7:44552245-44552507(-)
ENSMUSG00000060601	Nr1h2	chr7	-	44552696	44552754	44552696	44552719	44553578	44553708	3412	724549314	531	312983657	2156	185	150	0.40078	1	0.992,0.993,0.996	0.992,0.982,0.989	0.006	chr7:44552754-44553579(-)	chr7:44552719-44553579(-)
ENSMUSG00000060601	Nr1h2	chr7	-	44552696	44552757	44552696	44552719	44553578	44553708	3413	441351195	531	203661443	2156	188	150	0.0576204	0.390576	0.986,0.989,0.994	0.988,0.972,0.983	0.009	chr7:44552757-44553579(-)	chr7:44552719-44553579(-)
ENSMUSG00000060601	Nr1h2	chr7	-	44552696	44552757	44552696	44552754	44553578	44553708	3414	258189113	541387232	101402270	210724484	153	150	0.324662	0.969338	0.319,0.324,0.323	0.32,0.352,0.354	-0.02	chr7:44552757-44553579(-)	chr7:44552754-44553579(-)
ENSMUSG00000008845	Cd163	chr6	+	124328961	124329097	124329044	124329097	124327897	124327987	3415	1381	3083	3217	6217	233	150	0.246138	0.85961	0.218,0.392,0.177	0.244,0.392,0.392	-0.08	chr6:124327987-124328962(+)	chr6:124327987-124329045(+)
ENSMUSG00000031903	Pla2g15	chr8	+	106161083	106161308	106161208	106161308	106160580	106160679	3419	611584254	37296	244954502	75719	275	150	0.89022	1	0.9,0.917,0.958	0.95,0.901,0.935	-0.004	chr8:106160679-106161084(+)	chr8:106160679-106161209(+)
ENSMUSG00000032127	Vps11	chr9	-	44356227	44356453	44356227	44356429	44358068	44358316	3421	451	395279172	72	137542287	174	150	1	1	0.009,0.015,0.005	0.0,0.011,0.006	0.004	chr9:44356453-44358069(-)	chr9:44356429-44358069(-)
ENSMUSG00000002059	Rab34	chr11	+	78191574	78191682	78191610	78191682	78191364	78191455	3422	313112	0	51210	20	186	150	1	1	1.0,1.0,1.0	1.0,0.829,1.0	0.057	chr11:78191455-78191575(+)	chr11:78191455-78191611(+)
ENSMUSG00000072258	Taf1a	chr1	+	183400581	183400801	183400602	183400801	183397779	183397893	3424	360	13710545	110	5316792	171	150	0.622628	1	0.019,0.048,0.0	0.0,0.055,0.0	0.004	chr1:183397893-183400582(+)	chr1:183397893-183400603(+)
ENSMUSG00000020654	Adcy3	chr12	+	4208576	4208661	4208579	4208661	4206912	4206978	3427	233023	17127	144329	7347	153	150	0.82664	1	0.57,0.71,0.763	0.662,0.554,0.802	0.008	chr12:4206978-4208577(+)	chr12:4206978-4208580(+)
ENSMUSG00000027933	Ints3	chr3	-	90392075	90392142	90392075	90392105	90392211	90392368	3428	842	478354162	1116	135610386	187	150	0.839882	1	0.013,0.009,0.01	0.006,0.014,0.012	0	chr3:90392142-90392212(-)	chr3:90392105-90392212(-)
ENSMUSG00000031375	Bgn	chrX	+	73492923	73493056	73492962	73493056	73492722	73492833	3430	10	870	0	6717	189	150	1	1	0.0,0.102,NA	0.0,0.0,0.0	0.051	chrX:73492833-73492924(+)	chrX:73492833-73492963(+)
ENSMUSG00000031388	Naa10	chrX	-	73916872	73917195	73916872	73917190	73917842	73917927	3432	359268143	0	128509238	10	155	150	1	1	1.0,1.0,1.0	1.0,0.998,1.0	0.001	chrX:73917195-73917843(-)	chrX:73917190-73917843(-)
ENSMUSG00000031388	Naa10	chrX	-	73919501	73919546	73919501	73919540	73919753	73919869	3433	15321084557	362110	52822171445	45220	156	150	0.391324	1	0.976,0.98,0.982	0.992,0.976,0.986	-0.005	chrX:73919546-73919754(-)	chrX:73919540-73919754(-)
ENSMUSG00000031386	Hcfc1	chrX	-	73947190	73947517	73947190	73947514	73947841	73948286	3434	15713665	413360138	46168128	129572285	153	150	0.371789	1	0.272,0.27,0.316	0.259,0.224,0.306	0.023	chrX:73947517-73947842(-)	chrX:73947514-73947842(-)
ENSMUSG00000031386	Hcfc1	chrX	-	73947841	73948418	73947841	73948286	73948901	73949065	3435	680446209	884703319	185804486	2031107619	282	150	0.169282	0.715977	0.29,0.252,0.258	0.326,0.279,0.295	-0.033	chrX:73948418-73948902(-)	chrX:73948286-73948902(-)
ENSMUSG00000031328	Flna	chrX	-	74228320	74228541	74228320	74228524	74228759	74228921	3436	524330	460529041719	168554	153956853182	167	150	0.683812	1	0.01,0.013,0.015	0.009,0.013,0.015	0	chrX:74228541-74228760(-)	chrX:74228524-74228760(-)
ENSMUSG00000031328	Flna	chrX	-	74240204	74240328	74240204	74240326	74240412	74240550	3437	487531811753	310	160062733412	1	152	150	1	1	0.999,1.0,1.0	1.0,1.0,1.0	0	chrX:74240328-74240413(-)	chrX:74240326-74240413(-)
ENSMUSG00000008682	Rpl10	chrX	+	74271360	74271718	74271659	74271718	74270978	74271024	3438	949875412	24536190849829	4131691982	96103943123238	300	150	0.901553	1	0.019,0.022,0.021	0.021,0.021,0.021	0	chrX:74271024-74271361(+)	chrX:74271024-74271660(+)
ENSMUSG00000009995	Taz	chrX	+	74288447	74288513	74288450	74288513	74288177	74288219	3440	17249	16311050	123423	55214122	153	150	0.520006	1	0.093,0.176,0.15	0.176,0.135,0.156	-0.016	chrX:74288219-74288448(+)	chrX:74288219-74288451(+)
ENSMUSG00000009995	Taz	chrX	+	74288928	74289019	74288983	74289019	74288661	74288714	3441	594413	100	106528	10	205	150	1	1	0.977,1.0,1.0	1.0,0.979,1.0	-0.001	chrX:74288714-74288929(+)	chrX:74288714-74288984(+)
ENSMUSG00000090077	Lime1	chr2	+	181382193	181382544	181382486	181382544	181381357	181381394	3445	836637	1052	2912371	692	300	150	0.719587	1	0.806,0.868,0.902	0.707,0.872,0.947	0.017	chr2:181381394-181382194(+)	chr2:181381394-181382487(+)
ENSMUSG00000067768	Xlr4b	chrX	+	73215227	73215355	73215240	73215355	73214773	73214856	3448	91612	100	102214	30	163	150	0.880621	1	0.892,1.0,1.0	1.0,0.871,1.0	0.007	chrX:73214856-73215228(+)	chrX:73214856-73215241(+)
ENSMUSG00000030533	Unc45a	chr7	-	80329021	80329162	80329021	80329131	80329505	80329647	3458	16815774	700	41217133	43	181	150	0.981351	1	0.952,1.0,1.0	1.0,0.978,0.974	0	chr7:80329162-80329506(-)	chr7:80329131-80329506(-)
ENSMUSG00000020430	Pes1	chr11	+	3973436	3973538	3973448	3973538	3973196	3973368	3466	29286	978603354	15417	3301450805	162	150	0.167506	0.712406	0.027,0.041,0.015	0.04,0.026,0.008	0.003	chr11:3973368-3973437(+)	chr11:3973368-3973449(+)
ENSMUSG00000050312	Nsun3	chr16	-	62776287	62776631	62776287	62776383	62785787	62785897	3473	23614671	495419	52241150	179144	300	150	0.237068	0.841379	0.707,0.575,0.651	0.605,0.57,0.63	0.043	chr16:62776631-62785788(-)	chr16:62776383-62785788(-)
ENSMUSG00000037572	Wdhd1	chr14	-	47266980	47267173	47266980	47267062	47268071	47268213	3475	14561089528	252215	5561802991	73519	261	150	0.566932	1	0.971,0.966,0.953	0.979,0.967,0.968	-0.008	chr14:47267173-47268072(-)	chr14:47267062-47268072(-)
ENSMUSG00000064289	Tank	chr2	+	61626902	61627014	61626905	61627014	61613650	61613798	3480	1329350	496315163	53221141	195691365	153	150	0.227659	0.825601	0.207,0.224,0.231	0.21,0.239,0.275	-0.021	chr2:61613798-61626903(+)	chr2:61613798-61626906(+)
ENSMUSG00000022401	Xpnpep3	chr15	+	81415846	81415994	81415902	81415994	81414431	81414548	3483	42228	31	82714	12	206	150	0.583791	1	1.0,0.842,0.853	1.0,0.952,0.836	-0.031	chr15:81414548-81415847(+)	chr15:81414548-81415903(+)
ENSMUSG00000019802	Sec63	chr10	+	42812664	42812838	42812667	42812838	42812435	42812495	3487	569433195	33319	176927494	166324	153	150	0.706151	1	0.944,0.932,0.955	0.915,0.935,0.953	0.009	chr10:42812495-42812665(+)	chr10:42812495-42812668(+)
ENSMUSG00000032584	Mst1r	chr9	+	107914708	107914927	107914711	107914927	107914475	107914569	3488	0	22	20	23	153	150	1	1	NA,0.0,0.0	NA,0.495,0.0	-0.247	chr9:107914569-107914709(+)	chr9:107914569-107914712(+)
ENSMUSG00000022521	Crebbp	chr16	-	4101557	4101668	4101557	4101638	4107427	4107516	3489	8111	516442135	4139	140531305	180	150	0.213738	0.801342	0.013,0.02,0.006	0.023,0.02,0.024	-0.009	chr16:4101668-4107428(-)	chr16:4101638-4107428(-)
ENSMUSG00000037447	Arid5a	chr1	+	36316208	36316327	36316211	36316327	36307753	36307836	3494	220127119	552524	54289139	175747	153	150	0.364187	1	0.797,0.833,0.829	0.757,0.833,0.744	0.042	chr1:36307836-36316209(+)	chr1:36307836-36316212(+)
ENSMUSG00000037447	Arid5a	chr1	+	36317203	36317662	36317609	36317662	36316211	36316327	3496	231159100	351616	101342184	135434	300	150	0.365195	1	0.767,0.832,0.758	0.795,0.76,0.73	0.024	chr1:36316327-36317204(+)	chr1:36316327-36317610(+)
ENSMUSG00000051169	Rpusd3	chr6	-	113416306	113416446	113416306	113416432	113416788	113416912	3500	363012	430	136821	153	164	150	0.107205	0.555264	0.892,0.901,1.0	1.0,0.806,0.865	0.041	chr6:113416446-113416789(-)	chr6:113416432-113416789(-)
ENSMUSG00000020747	Tmem94	chr11	+	115790966	115791176	115791032	115791176	115790169	115790334	3502	334237135	15513082	96437239	77241140	216	150	0.235369	0.838592	0.599,0.559,0.533	0.464,0.557,0.542	0.043	chr11:115790334-115790967(+)	chr11:115790334-115791033(+)
ENSMUSG00000025437	Usp33	chr3	+	152358635	152358698	152358640	152358698	152358145	152358199	3504	281217124	400	94429242	41	155	150	1	1	0.986,1.0,1.0	1.0,0.99,0.996	0	chr3:152358199-152358636(+)	chr3:152358199-152358641(+)
ENSMUSG00000025437	Usp33	chr3	+	152374890	152374985	152374914	152374985	152374619	152374789	3506	17915489	887551	52273130	3719797	174	150	0.0107391	0.144927	0.637,0.639,0.601	0.548,0.544,0.536	0.083	chr3:152374789-152374891(+)	chr3:152374789-152374915(+)
ENSMUSG00000059327	Eda	chrX	+	100395018	100395143	100395027	100395143	100392332	100392384	3507	410	0	262	41	159	150	1	1	1.0,1.0,NA	1.0,0.586,0.654	0.253	chrX:100392384-100395019(+)	chrX:100392384-100395028(+)
ENSMUSG00000034160	Ogt	chrX	+	101642975	101643156	101643005	101643156	101640217	101640322	3509	722684254	374279155	256989582	74373177	180	150	0.000290721	0.013006	0.617,0.671,0.577	0.742,0.688,0.733	-0.099	chrX:101640322-101642976(+)	chrX:101640322-101643006(+)
ENSMUSG00000038543	BC028528	chr3	-	95884969	95885071	95884969	95885068	95888140	95888296	3511	12113654	1076835	28174118	2915564	153	150	0.48494	1	0.526,0.662,0.602	0.486,0.524,0.644	0.045	chr3:95885071-95888141(-)	chr3:95885068-95888141(-)
ENSMUSG00000004815	Dgkq	chr5	-	108656045	108656131	108656045	108656085	108656423	108656523	3512	735712	11175	1710544	12614	196	150	0.974897	1	0.835,0.72,0.647	0.52,0.931,0.706	0.015	chr5:108656131-108656424(-)	chr5:108656085-108656424(-)
ENSMUSG00000090733	Rps27	chr3	-	90212670	90212753	90212670	90212740	90212933	90213044	3513	26522191349536	653	101464239427237	345	163	150	1	1	1.0,1.0,1.0	1.0,1.0,1.0	0	chr3:90212753-90212934(-)	chr3:90212740-90212934(-)
ENSMUSG00000032480	Dhx30	chr9	-	110112970	110113090	110112970	110113025	110115035	110115161	3516	24419576	1417349	91381211	58210107	215	150	0.633974	1	0.547,0.651,0.52	0.523,0.559,0.579	0.019	chr9:110113090-110115036(-)	chr9:110113025-110115036(-)
ENSMUSG00000032480	Dhx30	chr9	-	110115035	110115211	110115035	110115161	110115490	110115582	3518	44812	18814870	122712	41242160	200	150	0.319982	0.962829	0.149,0.039,0.114	0.18,0.077,0.053	-0.003	chr9:110115211-110115491(-)	chr9:110115161-110115491(-)
ENSMUSG00000062070	Pgk1	chrX	+	106200116	106200336	106200156	106200336	106199646	106199761	3519	472	463427431730	260	148862693901	190	150	1	1	0.001,0.002,0.001	0.001,0.001,0.0	0.001	chrX:106199761-106200117(+)	chrX:106199761-106200157(+)
ENSMUSG00000021932	Rnaseh2b	chr14	+	62348520	62348628	62348561	62348628	62346567	62346642	3526	1196782375	1062	3041551882	1113	191	150	1	1	0.989,0.99,0.993	0.996,0.991,0.996	-0.004	chr14:62346642-62348521(+)	chr14:62346642-62348562(+)
ENSMUSG00000040549	Ckap5	chr2	+	91619687	91619839	91619750	91619839	91616300	91616460	3529	1080832420	19156	3381318798	3209	213	150	0.267663	0.886224	0.976,0.975,0.98	0.988,0.979,0.984	-0.007	chr2:91616460-91619688(+)	chr2:91616460-91619751(+)
ENSMUSG00000026820	Ptges2	chr2	+	32400389	32400552	32400402	32400552	32400049	32400108	3530	23118	26216378	8157	72395227	163	150	0.0125069	0.157244	0.075,0.058,0.086	0.093,0.034,0.028	0.021	chr2:32400108-32400390(+)	chr2:32400108-32400403(+)
ENSMUSG00000022749	Tbc1d23	chr16	-	57212370	57212575	57212370	57212490	57214163	57214269	3531	347303122	312815	146486270	52923	235	150	0.0328171	0.280966	0.877,0.874,0.838	0.949,0.915,0.882	-0.052	chr16:57212575-57214164(-)	chr16:57212490-57214164(-)
ENSMUSG00000040312	Cchcr1	chr17	+	35530401	35530558	35530443	35530558	35530147	35530299	3533	864	826440	116	338652	192	150	0.0475213	0.350262	0.071,0.068,0.072	0.023,0.009,0.083	0.032	chr17:35530299-35530402(+)	chr17:35530299-35530444(+)
ENSMUSG00000026815	Gfi1b	chr2	-	28611418	28611683	28611418	28611584	28612780	28612918	3534	9811034	11311236	4314795	45179114	249	150	0.557478	1	0.343,0.372,0.363	0.365,0.331,0.334	0.016	chr2:28611683-28612781(-)	chr2:28611584-28612781(-)
[truncated: 1,506 more rows]

## Sheet: A5SS
GeneID	geneSymbol	chr	strand	longExonStart_0base	longExonEnd	shortES	shortEE	flankingES	flankingEE	ID.1	IJC_SAMPLE_1	SJC_SAMPLE_1	IJC_SAMPLE_2	SJC_SAMPLE_2	IncFormLen	SkipFormLen	PValue	FDR	IncLevel1	IncLevel2	IncLevelDifference	chr.start.stop.long	chr.start.stop.short
[truncated: 1,817 more rows]

[truncated: 3 more sheets: MXE, RI, SE]
