# Supplementary material for: U2af1S34F and U2af1Q157R myeloid neoplasm-associated hotspot mutations induce distinct hematopoietic phenotypes in mice
Source: Leukemia. 2026 May 6;40(7):1467–81. doi: 10.1038/s41375-026-02974-7 (PMC13276503; doi:10.1038/s41375-026-02974-7)
Supplement: Supplementary file 7 — Table S7 Mouse KL S34F_Fei alternative splicing [file 41375_2026_2974_MOESM7_ESM.xlsx]

## Sheet: A3SS
GeneID	geneSymbol	chr	strand	longExonStart_0base	longExonEnd	shortES	shortEE	flankingES	flankingEE	ID.1	IJC_SAMPLE_1	SJC_SAMPLE_1	IJC_SAMPLE_2	SJC_SAMPLE_2	IncFormLen	SkipFormLen	PValue	FDR	IncLevel1	IncLevel2	IncLevelDifference	chr.start.stop.long	chr.start.stop.short
ENSMUSG00000025085	Ablim1	chr19	-	57046924	57047071	57046924	57047065	57049461	57049509	3	3443	123158	2715	1211217	56	50	0.642795	1	0.182,0.543,0.192,0.251	0.13,0.362,0.041,0.389	0.062	chr19:57047071-57049462(-)	chr19:57047065-57049462(-)
ENSMUSG00000024985	Tcf7l2	chr19	+	55917338	55917479	55917353	55917479	55912558	55912645	7	0	120	20	111	65	50	1	1	NA,0.0,0.0,NA	NA,0.0,0.606,0.0	-0.202	chr19:55912645-55917339(+)	chr19:55912645-55917354(+)
ENSMUSG00000025231	Sufu	chr19	+	46453158	46453315	46453161	46453315	46450890	46450963	10	13202323	22162622	17211616	17232421	53	50	0.665948	1	0.358,0.541,0.455,0.497	0.485,0.463,0.386,0.418	0.025	chr19:46450963-46453159(+)	chr19:46450963-46453162(+)
ENSMUSG00000025224	Gbf1	chr19	+	46268390	46268516	46268419	46268516	46267992	46268116	12	60404247	120	55414252	2020	79	50	1	1	1.0,0.962,0.93,1.0	0.946,1.0,0.93,1.0	0.004	chr19:46268116-46268391(+)	chr19:46268116-46268420(+)
ENSMUSG00000015176	Nolc1	chr19	+	46078857	46079021	46078872	46079021	46078702	46078758	13	8753	52405541	2546	40354935	65	50	0.596309	1	0.106,0.119,0.065,0.053	0.037,0.099,0.059,0.117	0.008	chr19:46078758-46078858(+)	chr19:46078758-46078873(+)
ENSMUSG00000015176	Nolc1	chr19	+	46078857	46079021	46078875	46079021	46078702	46078758	14	88106	293278393318	3547	237362278252	68	50	0.135541	0.742097	0.02,0.021,0.018,0.014	0.009,0.01,0.01,0.02	0.006	chr19:46078758-46078858(+)	chr19:46078758-46078876(+)
ENSMUSG00000015176	Nolc1	chr19	+	46078872	46079021	46078875	46079021	46078702	46078758	15	52416044	293278393318	41354936	237362278252	53	50	0.592656	1	0.143,0.122,0.126,0.115	0.14,0.084,0.143,0.119	0.005	chr19:46078758-46078873(+)	chr19:46078758-46078876(+)
ENSMUSG00000015176	Nolc1	chr19	+	46079907	46080085	46079910	46080085	46079130	46079258	16	181156186198	210194244246	157179158149	148254219171	53	50	0.874131	1	0.448,0.431,0.418,0.432	0.5,0.399,0.405,0.451	-0.007	chr19:46079258-46079908(+)	chr19:46079258-46079911(+)
ENSMUSG00000040913	Fbxw4	chr19	-	45579120	45579262	45579120	45579207	45579652	45579793	19	721169699	613911	979110486	26117	100	50	0.126861	0.71132	0.857,0.817,0.842,0.818	0.96,0.883,0.825,0.86	-0.048	chr19:45579262-45579653(-)	chr19:45579207-45579653(-)
ENSMUSG00000025193	Cutc	chr19	+	43762872	43763006	43762902	43763006	43760688	43760724	20	56715643	9132317	73685269	35513	80	50	0.000295838	0.0115787	0.795,0.773,0.603,0.613	0.938,0.895,0.867,0.768	-0.171	chr19:43760724-43762873(+)	chr19:43760724-43762903(+)
ENSMUSG00000025157	Zdhhc16	chr19	+	41938719	41938836	41938807	41938836	41938363	41938452	22	28242825	1039110298	11282421	799886108	100	50	0.335355	1	0.12,0.117,0.121,0.113	0.065,0.125,0.122,0.089	0.017	chr19:41938452-41938720(+)	chr19:41938452-41938808(+)
ENSMUSG00000025154	Arhgap19	chr19	-	41781157	41781349	41781157	41781304	41782330	41782396	24	206193169173	10121414	176203172155	51067	95	50	0.0215327	0.251831	0.916,0.894,0.864,0.867	0.949,0.914,0.938,0.921	-0.045	chr19:41781349-41782331(-)	chr19:41781304-41782331(-)
ENSMUSG00000041180	Hectd2	chr19	+	36609255	36609423	36609264	36609423	36606385	36606474	32	10	1003	1001	211	59	50	1	1	0.0,NA,1.0,0.0	1.0,0.0,0.0,0.459	-0.031	chr19:36606474-36609256(+)	chr19:36606474-36609265(+)
ENSMUSG00000024795	Kif20b	chr19	+	34936937	34937084	34936966	34937084	34936776	34936848	33	58455257	101	37594937	1001	79	50	1	1	1.0,0.966,1.0,0.973	0.959,1.0,1.0,0.959	0.005	chr19:34936848-34936938(+)	chr19:34936848-34936967(+)
ENSMUSG00000024795	Kif20b	chr19	+	34941212	34941441	34941332	34941441	34940092	34940231	34	6756	25152633	1718911	22221725	100	50	0.000546204	0.0192781	0.107,0.189,0.088,0.083	0.279,0.29,0.209,0.18	-0.123	chr19:34940231-34941213(+)	chr19:34940231-34941333(+)
ENSMUSG00000024781	Lipa	chr19	-	34524737	34524846	34524737	34524842	34527365	34527474	35	80838774	115210	75846854	91164	54	50	0.504824	1	0.871,0.939,0.976,0.873	0.885,0.876,0.913,0.926	0.015	chr19:34524846-34527366(-)	chr19:34524842-34527366(-)
ENSMUSG00000024924	Vldlr	chr19	+	27241234	27241453	27241299	27241453	27240465	27240637	38	70105	10	149510	22	100	50	1	1	1.0,NA,0.833,1.0	1.0,1.0,0.556,0.714	0.127	chr19:27240637-27241235(+)	chr19:27240637-27241300(+)
ENSMUSG00000024659	Anxa1	chr19	-	20384474	20384583	20384474	20384579	20384692	20384772	40	465695244326	210	456394402409	3311	54	50	1	1	1.0,0.997,0.996,1.0	0.993,0.992,0.997,0.997	0.004	chr19:20384583-20384693(-)	chr19:20384579-20384693(-)
ENSMUSG00000024680	Ms4a2	chr19	-	11618853	11619009	11618853	11618898	11619616	11619673	51	57486334	100	87687465	2012	100	50	0.515288	1	1.0,0.96,1.0,1.0	0.956,1.0,0.974,0.942	0.022	chr19:11619009-11619617(-)	chr19:11618898-11619617(-)
ENSMUSG00000024677	Ms4a6b	chr19	+	11526620	11526897	11526699	11526897	11523909	11523966	53	3515	67475049	5544	45485847	100	50	0.34151	1	0.022,0.051,0.01,0.049	0.053,0.05,0.033,0.041	-0.011	chr19:11523966-11526621(+)	chr19:11523966-11526700(+)
ENSMUSG00000024735	Prpf19	chr19	+	10898925	10899124	10898982	10899124	10897816	10897893	55	78628759	544556634517	88119110104	495549475462	100	50	1.78758e-06	0.000196287	0.067,0.053,0.064,0.054	0.082,0.098,0.104,0.101	-0.037	chr19:10897893-10898926(+)	chr19:10897893-10898983(+)
ENSMUSG00000071647	Eml3	chr19	+	8931043	8931304	8931046	8931304	8930798	8930970	56	59575039	40533531	40414637	41213031	53	50	0.829136	1	0.582,0.504,0.574,0.543	0.479,0.648,0.591,0.53	-0.011	chr19:8930970-8931044(+)	chr19:8930970-8931047(+)
ENSMUSG00000010110	Stx5a	chr19	+	8754876	8755642	8754908	8755642	8749905	8750027	58	4203	155162154116	1322	131109119118	82	50	1	1	0.015,0.007,0.0,0.016	0.005,0.017,0.01,0.01	-0.001	chr19:8750027-8754877(+)	chr19:8750027-8754909(+)
ENSMUSG00000024963	Dnajc4	chr19	-	6989422	6989587	6989422	6989584	6989680	6989865	61	17221624	8527	18211520	5452	53	50	0.465298	1	0.667,0.806,0.883,0.764	0.773,0.832,0.739,0.904	-0.032	chr19:6989587-6989681(-)	chr19:6989584-6989681(-)
ENSMUSG00000024962	Vegfb	chr19	-	6985360	6985596	6985360	6985495	6985804	6985840	62	34355136	23273936	54405345	30172026	100	50	0.00836492	0.134232	0.425,0.393,0.395,0.333	0.474,0.541,0.57,0.464	-0.126	chr19:6985596-6985805(-)	chr19:6985495-6985805(-)
ENSMUSG00000032946	Rasgrp2	chr19	+	6402471	6402574	6402551	6402574	6401715	6401863	67	1402115812781065	1000	1303108810081047	0	100	50	1	1	0.999,1.0,1.0,1.0	1.0,1.0,1.0,1.0	0	chr19:6401863-6402472(+)	chr19:6401863-6402552(+)
ENSMUSG00000024949	Sf1	chr19	+	6374524	6374608	6374548	6374608	6374009	6374283	68	5531	394387477337	283	413361373337	74	50	1	1	0.009,0.009,0.004,0.002	0.0,0.004,0.014,0.006	0	chr19:6374283-6374525(+)	chr19:6374283-6374549(+)
ENSMUSG00000024949	Sf1	chr19	+	6374718	6374898	6374819	6374898	6374548	6374608	70	841772903620	5552	846730709616	4815	100	50	0.983852	1	0.988,0.987,0.989,0.994	0.991,0.979,0.997,0.984	0.002	chr19:6374608-6374719(+)	chr19:6374608-6374820(+)
ENSMUSG00000054874	Pcnx3	chr19	-	5677124	5677275	5677124	5677167	5677405	5677498	71	1201049871	10	906811274	0	100	50	1	1	1.0,1.0,0.98,1.0	1.0,1.0,1.0,1.0	-0.005	chr19:5677275-5677406(-)	chr19:5677167-5677406(-)
ENSMUSG00000054874	Pcnx3	chr19	-	5681431	5681574	5681431	5681553	5683306	5683412	73	12151319	4164	981515	13254	71	50	0.163347	0.831029	0.679,0.914,0.604,0.77	0.328,0.738,0.679,0.725	0.124	chr19:5681574-5683307(-)	chr19:5681553-5683307(-)
ENSMUSG00000024906	Mus81	chr19	-	5483107	5483221	5483107	5483191	5483454	5483558	76	1122	40354033	5313	44433437	80	50	0.0881863	0.587859	0.015,0.018,0.03,0.036	0.066,0.042,0.018,0.048	-0.019	chr19:5483221-5483455(-)	chr19:5483191-5483455(-)
ENSMUSG00000024906	Mus81	chr19	-	5483634	5483763	5483634	5483665	5483929	5484025	77	56564164	2553	69545853	4210	100	50	0.0260273	0.284215	0.933,0.848,0.804,0.914	0.896,0.931,0.967,1.0	-0.074	chr19:5483763-5483930(-)	chr19:5483665-5483930(-)
ENSMUSG00000047423	AI837181	chr19	+	5425936	5427313	5425950	5427313	5425156	5425308	80	992711	61536752	6685	52494950	64	50	0.0109396	0.155559	0.103,0.117,0.239,0.142	0.083,0.087,0.113,0.072	0.061	chr19:5425308-5425937(+)	chr19:5425308-5425951(+)
ENSMUSG00000024914	Drap1	chr19	-	5423559	5423674	5423559	5423653	5423771	5423891	81	761019294	676724815700	928983102	681640599652	71	50	0.213712	0.954582	0.073,0.089,0.074,0.086	0.087,0.089,0.089,0.099	-0.011	chr19:5423674-5423772(-)	chr19:5423653-5423772(-)
ENSMUSG00000024858	Grk2	chr19	-	4289897	4290020	4289897	4290005	4290073	4290168	82	4222	516483418420	4442	486428466465	65	50	1	1	0.006,0.003,0.004,0.004	0.006,0.007,0.007,0.003	-0.001	chr19:4290020-4290074(-)	chr19:4290005-4290074(-)
ENSMUSG00000005986	Ankrd13d	chr19	-	4281917	4282042	4281917	4282034	4282168	4282304	83	4552	1100	2132	122	58	50	0.0985109	0.6222	0.775,0.812,1.0,1.0	1.0,0.463,0.564,0.463	0.274	chr19:4282042-4282169(-)	chr19:4282034-4282169(-)
ENSMUSG00000034616	Ssh3	chr19	-	4265609	4265715	4265609	4265703	4265809	4265998	84	2232	25232017	2222	25262121	62	50	0.65595	1	0.061,0.066,0.108,0.087	0.061,0.058,0.071,0.071	0.015	chr19:4265715-4265810(-)	chr19:4265703-4265810(-)
ENSMUSG00000024830	Rps6kb2	chr19	-	4158065	4158363	4158065	4158128	4158609	4158919	85	31097	38564640	510111	36404740	100	50	0.779125	1	0.038,0.082,0.089,0.08	0.065,0.111,0.105,0.012	-0.001	chr19:4158363-4158610(-)	chr19:4158128-4158610(-)
ENSMUSG00000024851	Pitpnm1	chr19	+	4110841	4110990	4110947	4110990	4110494	4110659	88	80755847	101047	52367352	31347	100	50	0.893818	1	0.8,0.789,0.879,0.77	0.897,0.581,0.901,0.788	0.018	chr19:4110659-4110842(+)	chr19:4110659-4110948(+)
ENSMUSG00000024851	Pitpnm1	chr19	+	4112661	4112876	4112747	4112876	4112326	4112510	89	4436	32483015	7142	31282721	100	50	0.771388	1	0.059,0.04,0.048,0.167	0.101,0.018,0.069,0.045	0.02	chr19:4112510-4112662(+)	chr19:4112510-4112748(+)
ENSMUSG00000024908	Ppp6r3	chr19	-	3473768	3473866	3473768	3473815	3478277	3478364	90	176182187150	19182923	192198159139	27272044	100	50	0.142701	0.77168	0.822,0.835,0.763,0.765	0.78,0.786,0.799,0.612	0.052	chr19:3473866-3478278(-)	chr19:3473815-3478278(-)
ENSMUSG00000024908	Ppp6r3	chr19	-	3473768	3473866	3473768	3473815	3484830	3484916	91	11013010796	3422	1101129881	2123	100	50	0.499276	1	0.948,0.942,0.964,0.96	0.965,0.982,0.961,0.931	-0.006	chr19:3473866-3484831(-)	chr19:3473815-3484831(-)
ENSMUSG00000024908	Ppp6r3	chr19	-	3526701	3526934	3526701	3526929	3544107	3544255	92	75849995	4323	70637191	9425	55	50	0.047244	0.419676	0.945,0.962,0.978,0.966	0.876,0.935,0.97,0.943	0.032	chr19:3526934-3544108(-)	chr19:3526929-3544108(-)
ENSMUSG00000053477	Tcf4	chr18	+	69564033	69564163	69564036	69564163	69519964	69520026	96	3323	1001	5235	1210	53	50	1	1	0.739,1.0,1.0,0.739	0.825,0.485,0.739,1.0	0.107	chr18:69520026-69564034(+)	chr18:69520026-69564037(+)
ENSMUSG00000053477	Tcf4	chr18	+	69654960	69655037	69654963	69655037	69652393	69652472	97	30214017	6312	41312733	3046	53	50	0.83246	1	0.825,0.868,0.974,0.889	0.928,1.0,0.864,0.838	-0.018	chr18:69652472-69654961(+)	chr18:69652472-69654964(+)
ENSMUSG00000024539	Ptpn2	chr18	-	67675719	67675886	67675719	67675829	67677709	67677862	98	296277353266	67610	248265245222	8638	100	50	0.943908	1	0.961,0.952,0.967,0.93	0.939,0.957,0.976,0.933	0.001	chr18:67675886-67677710(-)	chr18:67675829-67677710(-)
ENSMUSG00000053877	Srcap	chr7	+	127529134	127529224	127529137	127529224	127528395	127528489	102	12141811	19202221	2018424	1015520	53	50	0.0172855	0.220418	0.373,0.398,0.436,0.331	0.654,0.531,0.43,0.531	-0.152	chr7:127528489-127529135(+)	chr7:127528489-127529138(+)
ENSMUSG00000005417	Mprip	chr11	+	59735829	59736064	59735943	59736064	59731507	59731592	104	40312946	8384	20393051	4121	100	50	0.00739618	0.124413	0.714,0.838,0.644,0.852	0.714,0.951,0.882,0.962	-0.115	chr11:59731592-59735830(+)	chr11:59731592-59735944(+)
ENSMUSG00000021326	Trim27	chr13	+	21190091	21190124	21190096	21190124	21189854	21189970	105	309284328295	2941	301326276252	7211	55	50	0.791439	1	0.993,0.966,0.987,0.996	0.975,0.993,0.996,0.996	-0.004	chr13:21189970-21190092(+)	chr13:21189970-21190097(+)
ENSMUSG00000030689	Ino80e	chr7	-	126857225	126857342	126857225	126857291	126857675	126857787	107	413436474383	77810	371364318318	41292	100	50	0.774528	1	0.967,0.969,0.967,0.95	0.979,0.938,0.946,0.988	0.001	chr7:126857342-126857676(-)	chr7:126857291-126857676(-)
ENSMUSG00000030689	Ino80e	chr7	-	126857675	126857787	126857675	126857722	126857873	126857952	109	379355451398	20182612	324370358317	812158	100	50	0.0280142	0.297688	0.905,0.908,0.897,0.943	0.953,0.939,0.923,0.952	-0.028	chr7:126857787-126857874(-)	chr7:126857722-126857874(-)
ENSMUSG00000025875	Tspan17	chr13	+	54795410	54795458	54795414	54795458	54795052	54795178	112	86103	100	7674	0	54	50	1	1	1.0,0.847,1.0,1.0	1.0,1.0,1.0,1.0	-0.038	chr13:54795178-54795411(+)	chr13:54795178-54795415(+)
ENSMUSG00000025875	Tspan17	chr13	+	54796597	54796768	54796721	54796768	54796156	54796218	113	8349	300	3246	0	100	50	0.355174	1	1.0,0.333,1.0,1.0	1.0,1.0,1.0,1.0	-0.167	chr13:54796218-54796598(+)	chr13:54796218-54796722(+)
ENSMUSG00000032637	Atxn2l	chr7	-	126496436	126496646	126496436	126496628	126497253	126497364	116	84686447	206184179140	77616355	151182160161	68	50	0.655382	1	0.231,0.214,0.208,0.198	0.273,0.198,0.225,0.201	-0.012	chr7:126496646-126497254(-)	chr7:126496628-126497254(-)
ENSMUSG00000030724	Cd19	chr7	-	126412070	126412181	126412070	126412178	126413390	126413669	117	10	0	10	311	53	50	1	1	NA,NA,1.0,NA	NA,0.0,0.485,0.0	0.838	chr7:126412181-126413391(-)	chr7:126412178-126413391(-)
ENSMUSG00000030769	Slc5a11	chr7	+	123265586	123265737	123265656	123265737	123265188	123265296	119	71239	3	159107	120	100	50	0.665823	1	1.0,1.0,1.0,0.6	1.0,0.818,0.714,1.0	0.017	chr7:123265296-123265587(+)	chr7:123265296-123265657(+)
ENSMUSG00000030663	1110004F10Rik	chr7	+	116103194	116103320	116103210	116103320	116101943	116102004	123	717139	293375303279	15121110	278333243222	66	50	0.395779	1	0.018,0.033,0.031,0.024	0.039,0.027,0.033,0.033	-0.006	chr7:116102004-116103195(+)	chr7:116102004-116103211(+)
ENSMUSG00000030670	Cyp2r1	chr7	-	114552720	114552876	114552720	114552810	114554590	114554635	125	3142	11	1242	0	100	50	1	1	1.0,1.0,0.667,0.5	1.0,1.0,1.0,1.0	-0.208	chr7:114552876-114554591(-)	chr7:114552810-114554591(-)
ENSMUSG00000018287	Spag7	chr11	-	70664987	70665076	70664987	70665046	70665296	70665364	127	274246355288	0	250243259254	1001	80	50	1	1	1.0,1.0,1.0,1.0	0.994,1.0,1.0,0.994	0.003	chr11:70665076-70665297(-)	chr11:70665046-70665297(-)
ENSMUSG00000048330	Ric3	chr7	-	109047950	109048096	109047950	109048093	109054364	109054458	128	1021	0	3	1011	53	50	1	1	1.0,NA,1.0,1.0	0.0,NA,0.0,0.739	0.754	chr7:109048096-109054365(-)	chr7:109048093-109054365(-)
ENSMUSG00000024424	Ttc39c	chr18	+	12735957	12736018	12735979	12736018	12734886	12734991	129	97210	44272736	3413	28284113	72	50	0.0200937	0.240698	0.124,0.153,0.049,0.162	0.069,0.09,0.017,0.138	0.043	chr18:12734991-12735958(+)	chr18:12734991-12735980(+)
ENSMUSG00000005823	Gpr108	chr17	-	57242940	57243134	57242940	57243113	57244246	57244368	132	97978895	65584762	98857670	45614040	71	50	0.561026	1	0.512,0.541,0.569,0.519	0.605,0.495,0.572,0.552	-0.021	chr17:57243134-57244247(-)	chr17:57243113-57244247(-)
ENSMUSG00000037032	Apbb1	chr7	-	105565532	105565653	105565532	105565647	105566050	105566178	133	0	112	1	2	56	50	1	1	NA,0.0,0.0,0.0	NA,NA,NA,0.309	-0.309	chr7:105565653-105566051(-)	chr7:105565647-105566051(-)
ENSMUSG00000037032	Apbb1	chr7	-	105565532	105565951	105565532	105565647	105566050	105566178	134	0	112	1	2	100	50	1	1	NA,0.0,0.0,0.0	NA,NA,NA,0.2	-0.2	chr7:105565951-105566051(-)	chr7:105565647-105566051(-)
ENSMUSG00000044465	Fam160a2	chr7	-	105388778	105388937	105388778	105388924	105389253	105389892	136	54392829	0	38293033	1	63	50	1	1	1.0,1.0,1.0,1.0	1.0,1.0,1.0,0.963	0.009	chr7:105388937-105389254(-)	chr7:105388924-105389254(-)
ENSMUSG00000022221	Ripk3	chr14	-	55788237	55788462	55788237	55788364	55788616	55788857	142	63506556	3	70565151	1153	100	50	0.00512331	0.0953123	1.0,1.0,1.0,0.903	0.972,0.966,0.836,0.895	0.058	chr14:55788462-55788617(-)	chr14:55788364-55788617(-)
ENSMUSG00000031403	Dkc1	chrX	+	75097234	75097369	75097282	75097369	75096833	75096901	146	51969	298271388332	812912	253266261291	98	50	0.355143	1	0.008,0.035,0.008,0.014	0.016,0.022,0.017,0.021	-0.003	chrX:75096901-75097235(+)	chrX:75096901-75097283(+)
ENSMUSG00000029060	Mib2	chr4	-	155655251	155655439	155655251	155655270	155655521	155656305	147	58726543	210	61525248	2000	100	50	1	1	1.0,0.947,0.97,1.0	0.938,1.0,1.0,1.0	-0.005	chr4:155655439-155655522(-)	chr4:155655270-155655522(-)
ENSMUSG00000099481	Xndc1	chr7	+	102071186	102071361	102071218	102071361	102069896	102069991	150	37255131	7161210	37553637	4422	82	50	9.18115e-06	0.000734333	0.763,0.488,0.722,0.654	0.849,0.893,0.916,0.919	-0.238	chr7:102069991-102071187(+)	chr7:102069991-102071219(+)
ENSMUSG00000026921	Egfl7	chr2	+	26590576	26590752	26590656	26590752	26590379	26590495	151	2645	959011780	6455	96937584	100	50	0.446358	1	0.01,0.032,0.017,0.03	0.03,0.021,0.032,0.029	-0.006	chr2:26590495-26590577(+)	chr2:26590495-26590657(+)
ENSMUSG00000022098	Bmp1	chr14	-	70486146	70486930	70486146	70486272	70490019	70490200	153	2123	6476	2204	3874	100	50	0.432288	1	0.143,0.111,0.125,0.2	0.25,0.111,0.0,0.333	-0.029	chr14:70486930-70490020(-)	chr14:70486272-70490020(-)
ENSMUSG00000022098	Bmp1	chr14	-	70507998	70508214	70507998	70508177	70508455	70508573	154	301	243	220	6240	87	50	1	1	NA,0.463,0.0,0.161	0.0,0.365,0.223,NA	0.012	chr14:70508214-70508456(-)	chr14:70508177-70508456(-)
ENSMUSG00000035401	Emsy	chr7	-	98593330	98593810	98593330	98593666	98594751	98595312	159	47383841	1	34423735	1010	100	50	1	1	1.0,1.0,1.0,0.953	0.944,1.0,0.949,1.0	0.015	chr7:98593810-98594752(-)	chr7:98593666-98594752(-)
ENSMUSG00000039361	Picalm	chr7	+	90191140	90191272	90191155	90191272	90189149	90189257	164	1058411684	54599573	47645844	85164108100	65	50	8.79297e-14	1.15862e-10	0.599,0.523,0.484,0.47	0.298,0.231,0.292,0.253	0.25	chr7:90189257-90191141(+)	chr7:90189257-90191156(+)
ENSMUSG00000030035	Wbp1	chr6	-	83120184	83120876	83120184	83120287	83121202	83121559	177	109958269	1317128	96837383	1314813	100	50	0.948291	1	0.807,0.736,0.774,0.812	0.787,0.748,0.82,0.761	0.003	chr6:83120876-83121203(-)	chr6:83120287-83121203(-)
ENSMUSG00000031097	Tnni2	chr7	+	142443531	142443660	142443570	142443660	142443302	142443431	180	101	6541	11	8542	89	50	1	1	0.0,0.101,0.0,0.36	0.0,0.0,0.123,0.219	0.03	chr7:142443431-142443532(+)	chr7:142443431-142443571(+)
ENSMUSG00000030532	Hddc3	chr7	+	80343678	80343956	80343715	80343956	80343565	80343594	181	1210	29162221	5010	52151822	87	50	1	1	0.019,0.067,0.025,0.0	0.052,0.0,0.031,0.0	0.007	chr7:80343594-80343679(+)	chr7:80343594-80343716(+)
ENSMUSG00000027752	Exosc8	chr3	-	54732111	54732229	54732111	54732217	54732699	54732745	182	971710	217220267249	48713	156236185180	62	50	0.722096	1	0.032,0.025,0.049,0.031	0.02,0.027,0.03,0.055	0.001	chr3:54732229-54732700(-)	chr3:54732217-54732700(-)
ENSMUSG00000020716	Nf1	chr11	+	79565417	79565551	79565420	79565551	79564823	79564946	185	5474	1000	7553	3100	53	50	0.739939	1	0.825,1.0,1.0,1.0	0.688,0.825,1.0,1.0	0.078	chr11:79564946-79565418(+)	chr11:79564946-79565421(+)
ENSMUSG00000002289	Angptl4	chr17	-	33780529	33780647	33780529	33780643	33780782	33780893	186	59558370	1102	56615649	3010	54	50	1	1	0.982,0.981,1.0,0.97	0.945,1.0,0.981,1.0	0.002	chr17:33780647-33780783(-)	chr17:33780643-33780783(-)
ENSMUSG00000078671	Chd2	chr7	-	73475343	73475579	73475343	73475493	73478658	73478730	187	1443	24201919	2123	22182217	100	50	0.315965	1	0.02,0.091,0.095,0.073	0.043,0.027,0.043,0.081	0.021	chr7:73475579-73478659(-)	chr7:73475493-73478659(-)
ENSMUSG00000000374	Trappc10	chr10	-	78201431	78201590	78201431	78201586	78202879	78203021	188	113859888	3120	931257784	5412	54	50	0.0751581	0.539202	0.972,0.987,0.978,1.0	0.945,0.967,0.986,0.975	0.016	chr10:78201590-78202880(-)	chr10:78201586-78202880(-)
ENSMUSG00000054277	Arfgap3	chr15	-	83310249	83310384	83310249	83310381	83313468	83313612	190	41354839	812118	26435730	910154	53	50	0.899652	1	0.829,0.733,0.805,0.821	0.732,0.802,0.782,0.876	-0.001	chr15:83310384-83313469(-)	chr15:83310381-83313469(-)
ENSMUSG00000079334	Naa80	chr9	+	107582816	107583519	107583135	107583519	107579099	107580935	191	70748171	0	71946880	10	100	50	1	1	1.0,1.0,1.0,1.0	1.0,1.0,0.971,1.0	0.007	chr9:107580935-107582817(+)	chr9:107580935-107583136(+)
ENSMUSG00000079056	Kcnip3	chr2	-	127465853	127465978	127465853	127465974	127510828	127510994	193	49573837	2017108	64404036	199209	54	50	0.86308	1	0.694,0.756,0.779,0.811	0.757,0.805,0.649,0.787	0.01	chr2:127465978-127510829(-)	chr2:127465974-127510829(-)
ENSMUSG00000032316	Clk3	chr9	-	57753270	57753430	57753270	57753400	57753500	57753595	194	101567	911008671	8769	871089292	80	50	0.213254	0.95361	0.064,0.086,0.042,0.058	0.054,0.039,0.039,0.058	0.015	chr9:57753430-57753501(-)	chr9:57753400-57753501(-)
ENSMUSG00000024290	Rock1	chr18	-	10116773	10116862	10116773	10116859	10119884	10119945	195	65534448	11773	67544345	14652	53	50	0.826615	1	0.848,0.877,0.856,0.938	0.819,0.895,0.89,0.955	-0.01	chr18:10116862-10119885(-)	chr18:10116859-10119885(-)
ENSMUSG00000022983	Scaf4	chr16	-	90242526	90242718	90242526	90242652	90242871	90242958	196	64526260	34455340	56727586	26433439	100	50	0.0225801	0.259772	0.485,0.366,0.369,0.429	0.519,0.456,0.524,0.524	-0.094	chr16:90242718-90242872(-)	chr16:90242652-90242872(-)
ENSMUSG00000038252	Ncapd2	chr6	-	125186099	125186281	125186099	125186261	125186753	125186812	201	344342372314	1836	298300284324	5421	70	50	0.356762	1	0.996,0.968,0.989,0.974	0.977,0.982,0.99,0.996	-0.005	chr6:125186281-125186754(-)	chr6:125186261-125186754(-)
ENSMUSG00000030057	Cnbp	chr6	-	87845121	87845323	87845121	87845320	87845464	87845557	203	409578499460	845742929797	366455365381	703767660723	53	50	0.477789	1	0.313,0.424,0.336,0.353	0.329,0.359,0.343,0.332	0.016	chr6:87845323-87845465(-)	chr6:87845320-87845465(-)
ENSMUSG00000020752	Recql5	chr11	-	115927967	115928486	115927967	115928144	115930676	115930798	209	68567656	100	62836445	0	100	50	1	1	1.0,0.966,1.0,1.0	1.0,1.0,1.0,1.0	-0.008	chr11:115928486-115930677(-)	chr11:115928144-115930677(-)
ENSMUSG00000066952	Myo1h	chr5	+	114361199	114361324	114361226	114361324	114361042	114361113	211	1000	30	0	1000	77	50	1	1	1.0,NA,0.0,NA	0.0,NA,NA,NA	0.5	chr5:114361113-114361200(+)	chr5:114361113-114361227(+)
ENSMUSG00000045180	Shroom2	chrX	-	152623125	152623335	152623125	152623317	152657423	152657524	214	0	2000	100	0	68	50	1	1	0.0,NA,NA,NA	NA,1.0,NA,NA	-1	chrX:152623335-152657424(-)	chrX:152623317-152657424(-)
ENSMUSG00000035382	Pcsk7	chr9	+	45925910	45926067	45925917	45926067	45919791	45919894	215	48423844	2213	46354441	2124	57	50	0.721538	1	0.955,0.949,0.971,0.928	0.953,0.968,0.951,0.9	0.008	chr9:45919894-45925911(+)	chr9:45919894-45925918(+)
ENSMUSG00000014402	Tsg101	chr7	-	46908904	46908991	46908904	46908963	46910744	46910810	216	23373545	3015	20262320	322	78	50	0.775362	1	0.831,1.0,0.957,0.852	1.0,0.847,0.881,0.865	0.012	chr7:46908991-46910745(-)	chr7:46908963-46910745(-)
ENSMUSG00000014402	Tsg101	chr7	-	46908904	46909068	46908904	46908963	46910744	46910810	217	79569998	3015	831138996	322	100	50	0.46945	1	0.929,1.0,0.98,0.907	1.0,0.95,0.957,0.96	-0.013	chr7:46909068-46910745(-)	chr7:46908963-46910745(-)
ENSMUSG00000014402	Tsg101	chr7	-	46908904	46909068	46908904	46908991	46910744	46910810	218	10883150118	8201221	117156125120	4560	100	50	6.82335e-08	1.34863e-05	0.871,0.675,0.862,0.738	0.936,0.94,0.912,1.0	-0.16	chr7:46909068-46910745(-)	chr7:46908991-46910745(-)
ENSMUSG00000063229	Ldha	chr7	+	46848972	46849090	46849023	46849090	46847595	46847745	222	2601292831232747	891813	2634252824182373	21131210	100	50	0.885262	1	0.994,0.994,0.989,0.991	0.984,0.99,0.99,0.992	0.003	chr7:46847745-46848973(+)	chr7:46847745-46849024(+)
ENSMUSG00000063229	Ldha	chr7	+	46850177	46850351	46850203	46850351	46848972	46849090	223	2075237923552091	15281919	2119198518421902	29141626	76	50	0.335888	1	0.989,0.982,0.988,0.986	0.98,0.989,0.987,0.98	0.002	chr7:46849090-46850178(+)	chr7:46849090-46850204(+)
ENSMUSG00000006763	Saal1	chr7	-	46699363	46699552	46699363	46699547	46699635	46701961	224	59846560	5133	71766160	2014	55	50	0.149969	0.79307	0.915,0.987,0.952,0.948	0.97,1.0,0.982,0.932	-0.02	chr7:46699552-46699636(-)	chr7:46699547-46699636(-)
ENSMUSG00000006763	Saal1	chr7	-	46702401	46702517	46702401	46702492	46702620	46702680	225	90799396	614810	891068290	21269	75	50	0.247185	1	0.909,0.79,0.886,0.865	0.967,0.855,0.901,0.87	-0.036	chr7:46702517-46702621(-)	chr7:46702492-46702621(-)
ENSMUSG00000015966	Il17rb	chr14	-	30002362	30003046	30002362	30002414	30003560	30003687	231	1211	5412	101	8746	100	50	1	1	0.091,0.2,0.333,0.2	0.0,0.067,0.0,0.077	0.17	chr14:30003046-30003561(-)	chr14:30002414-30003561(-)
ENSMUSG00000003190	Bcl2l12	chr7	-	44994362	44994476	44994362	44994449	44996543	44996686	233	13161213	10198116107	81096	93103103109	77	50	0.0418496	0.385621	0.077,0.096,0.063,0.073	0.053,0.059,0.054,0.035	0.027	chr7:44994476-44996544(-)	chr7:44994449-44996544(-)
ENSMUSG00000037336	Mfsd2b	chr12	-	4865136	4866268	4865136	4865313	4866448	4866529	237	459911782	0	541247998	100	100	50	1	1	1.0,1.0,1.0,1.0	1.0,0.984,1.0,1.0	0.004	chr12:4866268-4866449(-)	chr12:4865313-4866449(-)
ENSMUSG00000037336	Mfsd2b	chr12	-	4869534	4869672	4869534	4869658	4870498	4870623	238	23114	6510817496	6856	67104114142	64	50	0.358877	1	0.023,0.021,0.047,0.032	0.065,0.057,0.033,0.032	-0.016	chr12:4869672-4870499(-)	chr12:4869658-4870499(-)
ENSMUSG00000042423	Fbrs	chr7	+	127489387	127489595	127489453	127489595	127489166	127489250	239	331269256222	7566	229207241216	5235	100	50	0.291793	1	0.959,0.964,0.955,0.949	0.958,0.981,0.976,0.956	-0.011	chr7:127489250-127489388(+)	chr7:127489250-127489454(+)
ENSMUSG00000030731	Syt3	chr7	+	44385928	44386121	44385955	44386121	44384805	44384949	240	100	1010	0	2000	77	50	1	1	0.0,1.0,0.0,NA	0.0,NA,NA,NA	0.333	chr7:44384949-44385929(+)	chr7:44384949-44385956(+)
ENSMUSG00000032507	Fbxl2	chr9	-	113983984	113984116	113983984	113984041	113984540	113984585	243	1000	8133	11	3646	100	50	1	1	0.059,0.0,0.0,0.0	0.0,0.0,0.111,0.077	-0.032	chr9:113984116-113984541(-)	chr9:113984041-113984541(-)
ENSMUSG00000033285	Wdr3	chr3	-	100157323	100157442	100157323	100157435	100159765	100159920	245	1036711082	0	80878271	1000	57	50	1	1	1.0,1.0,1.0,1.0	0.986,1.0,1.0,1.0	0.004	chr3:100157442-100159766(-)	chr3:100157435-100159766(-)
ENSMUSG00000033285	Wdr3	chr3	-	100159765	100159975	100159765	100159920	100161019	100161222	246	13299166141	4141	10414197112	313	100	50	0.516525	1	0.943,0.98,0.954,0.986	1.0,0.959,0.98,0.949	-0.006	chr3:100159975-100161020(-)	chr3:100159920-100161020(-)
ENSMUSG00000020818	Mfsd11	chr11	+	116859298	116859378	116859323	116859378	116858473	116858581	247	45454521	10838	40334449	1638	75	50	0.0939455	0.608797	0.75,0.789,0.909,0.636	0.964,0.786,0.907,0.803	-0.094	chr11:116858581-116859299(+)	chr11:116858581-116859324(+)
ENSMUSG00000020818	Mfsd11	chr11	+	116859298	116859378	116859348	116859378	116858473	116858581	248	55525529	1051	50455257	1110	100	50	1	1	0.965,1.0,0.846,0.935	0.962,0.957,0.963,1.0	-0.034	chr11:116858581-116859299(+)	chr11:116858581-116859349(+)
ENSMUSG00000020818	Mfsd11	chr11	+	116859323	116859378	116859348	116859378	116858473	116858581	249	20151316	1051	11181116	1110	75	50	1	1	0.93,1.0,0.634,0.914	0.88,0.923,0.88,1.0	-0.051	chr11:116858581-116859324(+)	chr11:116858581-116859349(+)
ENSMUSG00000028048	Gba	chr3	+	89207783	89207987	89207823	89207987	89207226	89207451	250	524	62777970	142	90968064	90	50	0.626758	1	0.0,0.035,0.014,0.031	0.0,0.006,0.027,0.017	0.007	chr3:89207451-89207784(+)	chr3:89207451-89207824(+)
ENSMUSG00000022948	Setd4	chr16	-	93593246	93593335	93593246	93593332	93596297	93596335	252	7769	0	4268	1	53	50	1	1	1.0,1.0,1.0,1.0	1.0,1.0,1.0,0.883	0.029	chr16:93593335-93596298(-)	chr16:93593332-93596298(-)
ENSMUSG00000032217	Rnf111	chr9	-	70429551	70429679	70429551	70429655	70430930	70431026	253	30161512	1313720	814910	158225	74	50	0.278693	1	0.609,0.454,0.591,0.288	0.265,0.542,0.217,0.575	0.086	chr9:70429679-70430931(-)	chr9:70429655-70430931(-)
ENSMUSG00000032217	Rnf111	chr9	-	70450285	70450541	70450285	70450538	70453500	70453817	254	10181621	811810	13191515	96118	53	50	0.908529	1	0.541,0.607,0.654,0.665	0.577,0.749,0.563,0.639	-0.015	chr9:70450541-70453501(-)	chr9:70450538-70453501(-)
ENSMUSG00000006998	Psmd2	chr16	+	20652151	20652300	20652243	20652300	20651703	20651851	255	1271213	615513631508	1081114	552496445432	100	50	0.967371	1	0.01,0.007,0.009,0.013	0.009,0.008,0.012,0.016	-0.001	chr16:20651851-20652152(+)	chr16:20651851-20652244(+)
ENSMUSG00000001750	Tcirg1	chr19	-	3898547	3898875	3898547	3898638	3898979	3899119	257	313262206206	2301	237239221162	1111	100	50	1	1	0.987,0.978,1.0,0.99	0.992,0.992,0.991,0.988	-0.002	chr19:3898875-3898980(-)	chr19:3898638-3898980(-)
ENSMUSG00000066571	4931406P16Rik	chr7	-	34240508	34240646	34240508	34240640	34242239	34242405	259	891412	1001	19221512	0	56	50	1	1	0.877,1.0,1.0,0.915	1.0,1.0,1.0,1.0	-0.052	chr7:34240646-34242240(-)	chr7:34240640-34242240(-)
ENSMUSG00000001248	Gramd1a	chr7	-	31142550	31142654	31142550	31142575	31142803	31142888	260	162157129116	1000	141121138119	0	100	50	1	1	0.988,1.0,1.0,1.0	1.0,1.0,1.0,1.0	-0.003	chr7:31142654-31142804(-)	chr7:31142575-31142804(-)
ENSMUSG00000058239	Usf2	chr7	-	30946750	30946879	30946750	30946855	30946964	30947059	262	10310510896	11	9048884	0	74	50	1	1	1.0,1.0,0.986,0.985	1.0,1.0,1.0,1.0	-0.007	chr7:30946879-30946965(-)	chr7:30946855-30946965(-)
ENSMUSG00000078762	Haus5	chr7	-	30656948	30657078	30656948	30657017	30657161	30657273	264	187190158180	201	172154162132	2212	100	50	0.531825	1	1.0,0.979,1.0,0.989	0.977,0.975,0.988,0.971	0.014	chr7:30657078-30657162(-)	chr7:30657017-30657162(-)
ENSMUSG00000037020	Wdr62	chr7	-	30242745	30242935	30242745	30242877	30243042	30243141	277	11367	1317139	2454	16201812	100	50	0.0241025	0.269144	0.297,0.081,0.188,0.28	0.059,0.091,0.122,0.143	0.108	chr7:30242935-30243043(-)	chr7:30242877-30243043(-)
ENSMUSG00000033111	3830406C13Rik	chr14	+	12285384	12285468	12285387	12285468	12284253	12284333	279	9866	54128	4747	8944	53	50	0.725822	1	0.629,0.654,0.321,0.414	0.321,0.423,0.485,0.623	0.041	chr14:12284333-12285385(+)	chr14:12284333-12285388(+)
ENSMUSG00000026307	Scly	chr1	+	91302768	91302869	91302772	91302869	91300527	91300640	282	83789774	1543	78877368	213	54	50	0.0562579	0.458531	0.987,0.935,0.957,0.958	1.0,0.976,0.985,0.955	-0.02	chr1:91300640-91302769(+)	chr1:91300640-91302773(+)
ENSMUSG00000026307	Scly	chr1	+	91308292	91308441	91308313	91308441	91305273	91305454	283	6567	797810689	5630	781129369	71	50	0.0774005	0.549209	0.051,0.043,0.038,0.052	0.043,0.036,0.022,0.0	0.021	chr1:91305454-91308293(+)	chr1:91305454-91308314(+)
ENSMUSG00000030589	Rasgrp4	chr7	+	29142965	29143139	29142995	29143139	29140487	29140641	286	4413	0	1795	1	80	50	1	1	1.0,1.0,1.0,1.0	1.0,1.0,1.0,0.758	0.06	chr7:29140641-29142966(+)	chr7:29140641-29142996(+)
ENSMUSG00000020737	Jpt1	chr11	-	115500665	115500723	115500665	115500684	115502004	115502102	292	26157	317273377261	21228	271278295261	89	50	0.660669	1	0.004,0.012,0.022,0.015	0.004,0.024,0.004,0.017	0.001	chr11:115500723-115502005(-)	chr11:115500684-115502005(-)
ENSMUSG00000052369	Tmem106c	chr15	+	97966068	97966310	97966246	97966310	97964839	97965030	293	8766	74828770	8415	89776994	100	50	0.119967	0.685306	0.051,0.041,0.033,0.041	0.043,0.025,0.007,0.026	0.016	chr15:97965030-97966069(+)	chr15:97965030-97966247(+)
ENSMUSG00000053158	Fes	chr7	-	80379610	80379734	80379610	80379704	80379817	80379912	295	374352256272	14474	370347302322	1391112	80	50	0.106276	0.654373	0.943,0.982,0.958,0.977	0.947,0.96,0.945,0.944	0.016	chr7:80379734-80379818(-)	chr7:80379704-80379818(-)
ENSMUSG00000053158	Fes	chr7	-	80382312	80382396	80382312	80382390	80382520	80382707	297	175161138122	8215	226179165173	8549	56	50	0.299675	1	0.951,0.986,0.992,0.956	0.962,0.97,0.974,0.945	0.009	chr7:80382396-80382521(-)	chr7:80382390-80382521(-)
ENSMUSG00000053158	Fes	chr7	-	80382312	80382431	80382312	80382390	80382520	80382707	298	1221379788	8215	951065964	8549	91	50	0.0111333	0.155559	0.893,0.974,0.982,0.906	0.867,0.921,0.89,0.796	0.07	chr7:80382431-80382521(-)	chr7:80382390-80382521(-)
ENSMUSG00000053158	Fes	chr7	-	80382312	80382431	80382312	80382396	80382520	80382707	299	1091177776	162141118110	65744547	196147151156	85	50	1.63756e-08	3.59626e-06	0.284,0.328,0.277,0.289	0.163,0.228,0.149,0.151	0.122	chr7:80382431-80382521(-)	chr7:80382396-80382521(-)
ENSMUSG00000030560	Ctsc	chr7	+	88281386	88281532	88281389	88281532	88278133	88278374	300	11810189100	1010	125827781	0	53	50	1	1	0.991,1.0,0.988,1.0	1.0,1.0,1.0,1.0	-0.005	chr7:88278374-88281387(+)	chr7:88278374-88281390(+)
ENSMUSG00000038690	Atp5j2	chr5	-	145188192	145188322	145188192	145188258	145191502	145191592	304	5211012	1224	5473	3346	100	50	0.00118707	0.0342516	0.714,0.84,0.714,0.6	0.455,0.4,0.467,0.2	0.336	chr5:145188322-145191503(-)	chr5:145188258-145191503(-)
ENSMUSG00000059743	Fdps	chr3	-	89094451	89094577	89094451	89094529	89094859	89094932	307	5645	351286270288	9543	386317342274	98	50	1	1	0.007,0.011,0.008,0.009	0.012,0.008,0.006,0.006	0.001	chr3:89094577-89094860(-)	chr3:89094529-89094860(-)
ENSMUSG00000005442	Cic	chr7	+	25291051	25291342	25291054	25291342	25290798	25290965	308	37463939	45294039	29265029	18413623	53	50	0.733193	1	0.437,0.599,0.479,0.485	0.603,0.374,0.567,0.543	-0.022	chr7:25290965-25291052(+)	chr7:25290965-25291055(+)
ENSMUSG00000005442	Cic	chr7	+	25292413	25292568	25292416	25292568	25292063	25292314	309	53505754	29284833	54594344	25273642	53	50	0.967493	1	0.633,0.628,0.528,0.607	0.671,0.673,0.53,0.497	0.006	chr7:25292314-25292414(+)	chr7:25292314-25292417(+)
ENSMUSG00000040940	Arhgef1	chr7	+	24912056	24912352	24912309	24912352	24908310	24908424	312	332303275222	30112	273251220247	310	100	50	0.0255479	0.281312	0.982,1.0,0.926,0.982	1.0,0.977,0.991,1.0	-0.02	chr7:24908424-24912057(+)	chr7:24908424-24912310(+)
ENSMUSG00000040940	Arhgef1	chr7	+	24916800	24916941	24916803	24916941	24916017	24916053	313	264302305238	23142220	268268215237	25201819	53	50	0.403244	1	0.915,0.953,0.929,0.918	0.91,0.927,0.918,0.922	0.009	chr7:24916053-24916801(+)	chr7:24916053-24916804(+)
ENSMUSG00000040940	Arhgef1	chr7	+	24918519	24919351	24919183	24919351	24917894	24918000	314	15513811499	19202921	1349910195	16171417	100	50	0.380694	1	0.803,0.775,0.663,0.702	0.807,0.744,0.783,0.736	-0.032	chr7:24918000-24918520(+)	chr7:24918000-24919184(+)
ENSMUSG00000016253	Nelfcd	chr2	+	174423003	174423204	174423051	174423204	174422566	174422674	319	21584	152138119110	941110	13697100112	98	50	0.251951	1	0.007,0.053,0.033,0.018	0.033,0.021,0.053,0.044	-0.01	chr2:174422674-174423004(+)	chr2:174422674-174423052(+)
ENSMUSG00000020056	Washc3	chr10	+	88215966	88216074	88215982	88216074	88213646	88213712	320	189191177152	0	153157148122	200	66	50	1	1	1.0,1.0,1.0,1.0	1.0,0.983,1.0,1.0	0.004	chr10:88213712-88215967(+)	chr10:88213712-88215983(+)
ENSMUSG00000020056	Washc3	chr10	+	88219249	88219360	88219252	88219360	88215966	88216074	321	98131114106	43363729	72978678	26232628	53	50	0.773734	1	0.683,0.774,0.744,0.775	0.723,0.799,0.757,0.724	-0.007	chr10:88216074-88219250(+)	chr10:88216074-88219253(+)
ENSMUSG00000023852	Chd1	chr17	+	15760305	15760450	15760327	15760450	15758581	15758732	323	3522	52487060	3133	47584939	72	50	0.845564	1	0.039,0.067,0.019,0.023	0.042,0.012,0.041,0.051	0.001	chr17:15758732-15760306(+)	chr17:15758732-15760328(+)
ENSMUSG00000002985	Apoe	chr7	-	19698187	19698272	19698187	19698253	19699010	19699052	324	34117	7207371508826	5566	583774658809	69	50	1	1	0.003,0.004,0.005,0.006	0.006,0.005,0.007,0.005	-0.001	chr7:19698272-19699011(-)	chr7:19698253-19699011(-)
ENSMUSG00000002981	Clptm1	chr7	-	19662144	19662342	19662144	19662233	19664933	19664955	326	4084	1100	7484	10	100	50	1	1	0.667,0.0,1.0,1.0	1.0,1.0,0.8,1.0	-0.283	chr7:19662342-19664934(-)	chr7:19662233-19664934(-)
ENSMUSG00000002043	Trappc6a	chr7	+	19515006	19515090	19515024	19515090	19514421	19514539	327	245271266161	82279	269202204209	11111011	68	50	0.879009	1	0.957,0.901,0.965,0.929	0.947,0.931,0.938,0.933	0.001	chr7:19514539-19515007(+)	chr7:19514539-19515025(+)
ENSMUSG00000003549	Ercc1	chr7	+	19352628	19352705	19352632	19352705	19350692	19350792	328	77406357	1211	45624859	211	54	50	1	1	0.986,0.949,0.983,0.981	1.0,0.966,0.978,0.982	-0.007	chr7:19350792-19352629(+)	chr7:19350792-19352633(+)
ENSMUSG00000030409	Dmpk	chr7	+	19092417	19092632	19092542	19092632	19092207	19092254	330	10	120	20	100	100	50	1	1	NA,0.0,0.2,NA	NA,0.0,1.0,NA	-0.4	chr7:19092254-19092418(+)	chr7:19092254-19092543(+)
ENSMUSG00000078485	Plekhn1	chr4	-	156222250	156222478	156222250	156222389	156222639	156222780	332	14241512	0	8171111	101	100	50	1	1	1.0,1.0,1.0,1.0	1.0,0.895,1.0,0.846	0.065	chr4:156222478-156222640(-)	chr4:156222389-156222640(-)
ENSMUSG00000078485	Plekhn1	chr4	-	156222250	156222481	156222250	156222389	156222639	156222780	333	611108	0	71188	101	100	50	1	1	1.0,1.0,1.0,1.0	1.0,0.846,1.0,0.8	0.089	chr4:156222481-156222640(-)	chr4:156222389-156222640(-)
ENSMUSG00000078485	Plekhn1	chr4	-	156222250	156222481	156222250	156222478	156222639	156222780	334	13	81354	3111	4734	53	50	0.21148	0.949148	0.0,0.0,0.159,0.414	0.414,0.119,0.239,0.191	-0.097	chr4:156222481-156222640(-)	chr4:156222478-156222640(-)
ENSMUSG00000001729	Akt1	chr12	-	112662179	112662334	112662179	112662308	112671515	112671654	337	8121617	194197234171	2191315	201199169166	76	50	0.422163	1	0.026,0.039,0.043,0.061	0.064,0.029,0.048,0.056	-0.007	chr12:112662334-112671516(-)	chr12:112662308-112671516(-)
ENSMUSG00000003099	Ppp5c	chr7	-	17008613	17009058	17008613	17008712	17009874	17009996	339	185175241165	3346	158193140141	6432	100	50	0.813713	1	0.969,0.967,0.968,0.932	0.929,0.96,0.959,0.972	0.004	chr7:17009058-17009875(-)	chr7:17008712-17009875(-)
ENSMUSG00000039221	Rpl22l1	chr3	+	28806669	28806858	28806736	28806858	28806499	28806592	341	15018610892	1557152719291517	110176117105	1575153512511284	100	50	0.351906	1	0.046,0.057,0.027,0.029	0.034,0.054,0.045,0.039	-0.003	chr3:28806592-28806670(+)	chr3:28806592-28806737(+)
ENSMUSG00000025137	Pcyt2	chr11	-	120613640	120613774	120613640	120613725	120614330	120614397	343	37910	76767457	6888	56635556	99	50	0.425861	1	0.02,0.044,0.058,0.081	0.051,0.06,0.068,0.067	-0.011	chr11:120613774-120614331(-)	chr11:120613725-120614331(-)
ENSMUSG00000111497	Gm38431	chr9	-	21080083	21080171	21080083	21080168	21080704	21080817	345	222193244210	22171828	208212194201	24121416	53	50	0.283667	1	0.905,0.915,0.927,0.876	0.891,0.943,0.929,0.922	-0.016	chr9:21080171-21080705(-)	chr9:21080168-21080705(-)
ENSMUSG00000055204	Ankrd17	chr5	-	90278242	90278391	90278242	90278388	90282850	90283603	346	1462526	4072	16251319	4333	53	50	0.658871	1	0.768,1.0,0.771,0.925	0.791,0.887,0.803,0.857	0.032	chr5:90278391-90282851(-)	chr5:90278388-90282851(-)
ENSMUSG00000040282	BC052040	chr2	+	115687045	115687169	115687063	115687169	115686384	115686450	348	1100	39283423	1010	21232234	68	50	1	1	0.019,0.026,0.0,0.0	0.034,0.0,0.032,0.0	-0.005	chr2:115686450-115687046(+)	chr2:115686450-115687064(+)
ENSMUSG00000023707	Ogfod2	chr5	+	124114064	124114645	124114387	124114645	124113428	124113528	385	55645547	518107	53525265	1312610	100	50	0.89658	1	0.846,0.64,0.733,0.77	0.671,0.684,0.812,0.765	0.014	chr5:124113528-124114065(+)	chr5:124113528-124114388(+)
ENSMUSG00000023707	Ogfod2	chr5	+	124114064	124114645	124114478	124114645	124113428	124113528	386	11811310983	2944	100109107101	4142	100	50	0.112784	0.670431	0.967,0.863,0.932,0.912	0.926,0.982,0.93,0.962	-0.031	chr5:124113528-124114065(+)	chr5:124113528-124114479(+)
ENSMUSG00000023707	Ogfod2	chr5	+	124114387	124114645	124114478	124114645	124113428	124113528	387	74716650	2944	62696953	4142	100	50	0.136509	0.746191	0.949,0.798,0.892,0.862	0.886,0.972,0.896,0.93	-0.046	chr5:124113528-124114388(+)	chr5:124113528-124114479(+)
ENSMUSG00000023707	Ogfod2	chr5	+	124114387	124114645	124114478	124114645	124114064	124114192	388	105749371	37116	87969264	4856	100	50	0.64612	1	0.946,0.841,0.809,0.855	0.916,0.857,0.902,0.842	-0.017	chr5:124114192-124114388(+)	chr5:124114192-124114479(+)
ENSMUSG00000002103	Acp2	chr2	+	91204227	91204326	91204239	91204326	91203600	91203696	389	3474	68564946	3325	50472946	62	50	0.682769	1	0.034,0.054,0.103,0.066	0.046,0.049,0.053,0.081	0.007	chr2:91203696-91204228(+)	chr2:91203696-91204240(+)
ENSMUSG00000110195	Pde2a	chr7	+	101503286	101503410	101503298	101503410	101502811	101502942	391	1623510	134837869	20101911	95737984	62	50	0.360081	1	0.088,0.183,0.049,0.105	0.145,0.099,0.162,0.096	-0.019	chr7:101502942-101503287(+)	chr7:101502942-101503299(+)
ENSMUSG00000078681	Tm2d3	chr7	+	65695142	65695327	65695169	65695327	65693850	65693943	392	52346548	6565	52604544	5426	77	50	0.384074	1	0.849,0.815,0.876,0.862	0.871,0.907,0.936,0.826	-0.034	chr7:65693943-65695143(+)	chr7:65693943-65695170(+)
ENSMUSG00000024072	Yipf4	chr17	+	74492326	74492505	74492345	74492505	74489492	74489794	394	20	91749583	10	101777851	69	50	1	1	0.0,0.0,0.015,0.0	0.0,0.0,0.009,0.0	0.002	chr17:74489794-74492327(+)	chr17:74489794-74492346(+)
ENSMUSG00000027284	Cdan1	chr2	-	120720881	120721010	120720881	120720989	120722609	120722758	399	1212	40484032	1	26353330	71	50	0.468584	1	0.017,0.029,0.017,0.042	0.0,0.0,0.0,0.023	0.021	chr2:120721010-120722610(-)	chr2:120720989-120722610(-)
ENSMUSG00000034675	Dbn1	chr13	-	55474455	55474561	55474455	55474558	55474859	55475536	402	1211	2312	2	3224	53	50	0.00905928	0.142003	0.321,0.386,0.485,0.321	0.0,0.0,0.0,0.321	0.298	chr13:55474561-55474860(-)	chr13:55474558-55474860(-)
ENSMUSG00000034675	Dbn1	chr13	-	55476145	55476773	55476145	55476316	55477550	55477680	403	10	8368	100	3211	100	50	1	1	0.0,0.0,0.077,0.0	0.0,0.2,0.0,0.0	-0.031	chr13:55476773-55477551(-)	chr13:55476316-55477551(-)
ENSMUSG00000042345	Ubash3a	chr17	+	31215036	31215235	31215146	31215235	31213731	31213918	405	208160195167	210	128189137164	2	100	50	1	1	1.0,0.976,0.99,1.0	1.0,1.0,1.0,0.976	-0.002	chr17:31213918-31215037(+)	chr17:31213918-31215147(+)
ENSMUSG00000064179	Tnnt1	chr7	-	4508473	4508625	4508473	4508583	4509010	4509124	407	1341	13201710	2210	1218815	92	50	0.184257	0.888772	0.04,0.075,0.113,0.052	0.083,0.057,0.064,0.0	0.019	chr7:4508625-4509011(-)	chr7:4508583-4509011(-)
ENSMUSG00000019254	Ppp1r12c	chr7	-	4483102	4483188	4483102	4483185	4483340	4483401	412	27222321	11010110366	3391412	841009475	53	50	0.186487	0.891132	0.188,0.17,0.174,0.231	0.27,0.078,0.123,0.131	0.04	chr7:4483188-4483341(-)	chr7:4483185-4483341(-)
ENSMUSG00000035545	Leng8	chr7	+	4143258	4143697	4143418	4143697	4142833	4143037	414	15261210	24232424	12889	21222025	100	50	0.0970554	0.61636	0.238,0.361,0.2,0.172	0.222,0.154,0.167,0.153	0.069	chr7:4143037-4143259(+)	chr7:4143037-4143419(+)
ENSMUSG00000022299	Slc25a32	chr15	-	39098128	39098242	39098128	39098197	39099872	39100033	415	45334260	140	34493440	1102	95	50	0.296896	1	1.0,0.946,0.847,1.0	0.947,0.963,1.0,0.913	-0.008	chr15:39098242-39099873(-)	chr15:39098197-39099873(-)
ENSMUSG00000039976	Tbc1d16	chr11	-	119156642	119156810	119156642	119156807	119157739	119157887	417	8344	4251	8022	4154	53	50	0.132833	0.735417	0.654,0.586,0.43,0.791	0.654,0.0,0.274,0.321	0.303	chr11:119156810-119157740(-)	chr11:119156807-119157740(-)
ENSMUSG00000030982	Vps35l	chr7	+	118743594	118743694	118743609	118743694	118740746	118740775	418	103779182	0	898584102	103	65	50	1	1	1.0,1.0,1.0,1.0	1.0,0.985,1.0,0.963	0.013	chr7:118740775-118743595(+)	chr7:118740775-118743610(+)
ENSMUSG00000003531	Dgcr6	chr16	+	18070081	18070231	18070090	18070231	18069423	18069524	419	34322429	8611090110	29433535	878278101	59	50	0.0583435	0.464984	0.251,0.198,0.184,0.183	0.22,0.308,0.276,0.227	-0.054	chr16:18069524-18070082(+)	chr16:18069524-18070091(+)
ENSMUSG00000030304	Ergic2	chr6	-	148188032	148188130	148188032	148188100	148189485	148189584	421	205177163139	810168	158155148134	4435	80	50	0.00186519	0.0470377	0.941,0.917,0.864,0.916	0.961,0.96,0.969,0.944	-0.049	chr6:148188130-148189486(-)	chr6:148188100-148189486(-)
ENSMUSG00000030231	Plekha5	chr6	+	140579426	140579476	140579429	140579476	140577226	140577338	424	1210	12121313	3120	10162018	53	50	0.72522	1	0.073,0.136,0.068,0.0	0.221,0.056,0.086,0.0	-0.021	chr6:140577338-140579427(+)	chr6:140577338-140579430(+)
ENSMUSG00000030231	Plekha5	chr6	+	140593554	140597110	140596248	140597110	140591627	140591764	425	611012	1113	4652	1323	100	50	0.0806488	0.556378	0.75,0.333,0.833,0.667	0.667,0.5,0.556,0.25	0.153	chr6:140591764-140593555(+)	chr6:140591764-140596249(+)
ENSMUSG00000090231	Cfb	chr17	-	34856879	34856945	34856879	34856929	34857003	34857136	429	1012	1	201	0	66	50	1	1	1.0,NA,1.0,0.602	NA,1.0,NA,1.0	-0.133	chr17:34856945-34857004(-)	chr17:34856929-34857004(-)
ENSMUSG00000026017	Carf	chr1	+	60109221	60109449	60109326	60109449	60108082	60108200	432	2541	2536	3213	1344	100	50	0.860957	1	0.333,0.333,0.4,0.077	0.6,0.25,0.111,0.273	-0.023	chr1:60108200-60109222(+)	chr1:60108200-60109327(+)
ENSMUSG00000015461	Atf6b	chr17	+	34648218	34648297	34648229	34648297	34647659	34647739	433	351294386383	1011	335332351338	1	61	50	1	1	0.997,1.0,0.997,0.997	1.0,1.0,1.0,0.996	-0.001	chr17:34647739-34648219(+)	chr17:34647739-34648230(+)
ENSMUSG00000045679	Pqlc3	chr12	-	16992277	16993573	16992277	16992319	16995613	16995671	435	27262620	1941711	31292132	6354	100	50	0.00188984	0.047282	0.415,0.765,0.433,0.476	0.721,0.829,0.677,0.8	-0.235	chr12:16993573-16995614(-)	chr12:16992319-16995614(-)
ENSMUSG00000045679	Pqlc3	chr12	-	16997633	16997703	16997633	16997656	16997773	16997856	436	61807252	301	103705159	1000	97	50	1	1	1.0,0.932,1.0,0.964	0.982,1.0,1.0,1.0	-0.022	chr12:16997703-16997774(-)	chr12:16997656-16997774(-)
ENSMUSG00000030309	Caprin2	chr6	-	148842492	148843398	148842492	148843054	148845171	148845235	437	11162121	1001	4131612	0	100	50	1	1	0.846,1.0,1.0,0.913	1.0,1.0,1.0,1.0	-0.06	chr6:148843398-148845172(-)	chr6:148843054-148845172(-)
ENSMUSG00000030149	Klrk1	chr6	-	129616296	129616350	129616296	129616332	129616668	129616773	438	1	4110	0	2534	68	50	1	1	0.0,0.0,0.0,1.0	0.0,0.0,0.0,0.0	0.25	chr6:129616350-129616669(-)	chr6:129616332-129616669(-)
ENSMUSG00000030154	Klrb1f	chr6	+	129053711	129053866	129053790	129053866	129053182	129053257	440	2917127	2322	58403830	131	100	50	0.00591345	0.105773	0.879,0.739,0.75,0.636	1.0,0.952,0.864,0.938	-0.187	chr6:129053257-129053712(+)	chr6:129053257-129053791(+)
ENSMUSG00000032366	Tpm1	chr9	-	67022592	67024565	67022592	67023441	67031028	67031098	443	164143	8793139102	61253	72958579	100	50	0.586528	1	0.084,0.021,0.048,0.014	0.04,0.059,0.029,0.019	0.005	chr9:67024565-67031029(-)	chr9:67023441-67031029(-)
ENSMUSG00000037997	Parp11	chr6	+	127470701	127470830	127470704	127470830	127468031	127468152	447	21121516	7243	17141211	7143	53	50	0.853495	1	0.739,0.85,0.78,0.834	0.696,0.93,0.739,0.776	0.015	chr6:127468152-127470702(+)	chr6:127468152-127470705(+)
ENSMUSG00000030346	Rad51ap1	chr6	-	126927537	126927690	126927537	126927687	126928140	126928227	448	76747471	51486543	71715151	46483741	53	50	0.989299	1	0.584,0.593,0.518,0.609	0.593,0.583,0.565,0.54	0.006	chr6:126927690-126928141(-)	chr6:126927687-126928141(-)
ENSMUSG00000029592	Usp30	chr5	+	114111868	114111914	114111871	114111914	114111116	114111215	450	21171624	812134	16171516	4413	53	50	0.0100628	0.150106	0.712,0.572,0.537,0.85	0.791,0.8,0.934,0.834	-0.172	chr5:114111215-114111869(+)	chr5:114111215-114111872(+)
ENSMUSG00000063870	Chd4	chr6	+	125100777	125100993	125100798	125100993	125100467	125100589	453	145116140113	181186214198	145118139146	151185170159	71	50	0.0437055	0.398083	0.361,0.305,0.315,0.287	0.403,0.31,0.365,0.393	-0.051	chr6:125100589-125100778(+)	chr6:125100589-125100799(+)
ENSMUSG00000063870	Chd4	chr6	+	125102431	125102610	125102470	125102610	125102162	125102298	454	286271284245	170153183140	292278268264	126150148107	89	50	0.0384846	0.370145	0.486,0.499,0.466,0.496	0.566,0.51,0.504,0.581	-0.053	chr6:125102298-125102432(+)	chr6:125102298-125102471(+)
ENSMUSG00000030330	Ing4	chr6	+	125047478	125047587	125047481	125047587	125047210	125047325	456	41177	63536150	5855	56536054	53	50	0.449851	1	0.057,0.164,0.098,0.117	0.078,0.125,0.073,0.08	0.02	chr6:125047325-125047479(+)	chr6:125047325-125047482(+)
ENSMUSG00000030330	Ing4	chr6	+	125047792	125047940	125047901	125047940	125047481	125047587	457	195209229191	610129	211195188179	3244	100	50	0.000558068	0.0195225	0.942,0.913,0.905,0.914	0.972,0.98,0.959,0.957	-0.048	chr6:125047587-125047793(+)	chr6:125047587-125047902(+)
ENSMUSG00000023191	P3h3	chr6	-	124850917	124850985	124850917	124850983	124851078	124851131	461	2112198	0	105127	10	52	50	1	1	1.0,1.0,1.0,1.0	1.0,1.0,0.92,1.0	0.02	chr6:124850985-124851079(-)	chr6:124850983-124851079(-)
ENSMUSG00000023191	P3h3	chr6	-	124854310	124854452	124854310	124854447	124854847	124854979	462	0	10598	10	3557	55	50	1	1	0.0,0.0,0.0,0.0	0.0,0.0,0.154,0.0	-0.038	chr6:124854452-124854848(-)	chr6:124854447-124854848(-)
ENSMUSG00000005069	Pex5	chr6	-	124404132	124404243	124404132	124404222	124404629	124404720	465	42355744	2110	38473954	1101	71	50	1	1	0.937,0.961,0.976,1.0	0.964,0.971,1.0,0.974	-0.009	chr6:124404243-124404630(-)	chr6:124404222-124404630(-)
ENSMUSG00000005069	Pex5	chr6	-	124413568	124413790	124413568	124413701	124414006	124414042	466	6111314	53845869	41045	53536565	100	50	0.0333852	0.337524	0.054,0.061,0.101,0.092	0.036,0.086,0.03,0.037	0.03	chr6:124413790-124414007(-)	chr6:124413701-124414007(-)
ENSMUSG00000040613	Apobec1	chr6	-	122591086	122591260	122591086	122591204	122596631	122596777	468	13548	39545547	5675	22302837	100	50	0.606193	1	0.143,0.044,0.035,0.078	0.102,0.091,0.111,0.063	-0.017	chr6:122591260-122596632(-)	chr6:122591204-122596632(-)
ENSMUSG00000028854	Slc9a1	chr4	+	133419924	133419995	133419946	133419995	133419453	133419543	469	58825771	171038	67827172	34911	72	50	0.152533	0.796548	0.703,0.851,0.93,0.86	0.939,0.934,0.846,0.82	-0.049	chr4:133419543-133419925(+)	chr4:133419543-133419947(+)
ENSMUSG00000037552	Plekhg2	chr7	-	28370237	28370497	28370237	28370494	28371114	28371245	471	1523	121	3013	1101	53	50	0.594263	1	1.0,0.825,0.485,0.739	0.739,0.0,1.0,0.739	0.143	chr7:28370497-28371115(-)	chr7:28370494-28371115(-)
ENSMUSG00000037552	Plekhg2	chr7	-	28370237	28371042	28370237	28370494	28371114	28371245	472	120	121	2011	1101	100	50	1	1	NA,0.333,0.333,0.0	0.5,0.0,1.0,0.333	-0.236	chr7:28371042-28371115(-)	chr7:28370494-28371115(-)
ENSMUSG00000037552	Plekhg2	chr7	-	28370237	28371042	28370237	28370497	28371114	28371245	473	120	1523	2011	3013	100	50	1	1	0.0,0.091,0.333,0.0	0.25,NA,0.333,0.143	-0.136	chr7:28371042-28371115(-)	chr7:28370497-28371115(-)
ENSMUSG00000041498	Kif14	chr1	+	136490199	136490384	136490206	136490384	136487403	136487467	475	18171730	1	28292016	0	57	50	1	1	1.0,1.0,1.0,0.963	1.0,1.0,1.0,1.0	-0.009	chr1:136487467-136490200(+)	chr1:136487467-136490207(+)
ENSMUSG00000067825	Pex26	chr6	+	121193511	121196185	121193514	121196185	121190100	121190247	476	17221513	5533	12171514	3424	53	50	0.777979	1	0.762,0.806,0.825,0.803	0.791,0.8,0.876,0.768	-0.01	chr6:121190247-121193512(+)	chr6:121190247-121193515(+)
ENSMUSG00000030166	Rad52	chr6	+	119922471	119922823	119922474	119922823	119920806	119921028	479	27362122	5462	28472029	3633	53	50	0.510878	1	0.836,0.895,0.768,0.912	0.898,0.881,0.863,0.901	-0.033	chr6:119921028-119922472(+)	chr6:119921028-119922475(+)
ENSMUSG00000041477	Dcp1b	chr6	+	119217802	119217979	119217901	119217979	119214769	119215606	480	50686635	1556	44445054	6102	100	50	0.104184	0.64631	0.962,0.872,0.868,0.745	0.786,0.957,1.0,0.931	-0.057	chr6:119215606-119217803(+)	chr6:119215606-119217902(+)
ENSMUSG00000025701	Alox5	chr6	-	116413737	116413916	116413737	116413820	116414522	116414609	487	59546744	1000	81766752	2100	100	50	1	1	0.967,1.0,1.0,1.0	0.953,0.974,1.0,1.0	0.01	chr6:116413916-116414523(-)	chr6:116413820-116414523(-)
ENSMUSG00000030123	Plxnd1	chr6	-	115967748	115967888	115967748	115967786	115967970	115968070	488	207153126142	100	181118115102	10	100	50	1	1	1.0,0.987,1.0,1.0	1.0,1.0,0.983,1.0	0.001	chr6:115967888-115967971(-)	chr6:115967786-115967971(-)
ENSMUSG00000025316	Banp	chr8	+	121978554	121978754	121978578	121978754	121975899	121975991	489	39345323	1000	28505847	2300	74	50	0.606781	1	0.963,1.0,1.0,1.0	0.904,0.918,1.0,1.0	0.035	chr8:121975991-121978555(+)	chr8:121975991-121978579(+)
ENSMUSG00000025316	Banp	chr8	+	121978554	121978754	121978601	121978754	121975899	121975991	490	53416937	200	35627065	3	97	50	1	1	1.0,0.914,1.0,1.0	1.0,1.0,1.0,0.918	-0.001	chr8:121975991-121978555(+)	chr8:121975991-121978602(+)
ENSMUSG00000025316	Banp	chr8	+	121978578	121978754	121978601	121978754	121975899	121975991	491	1571614	200	9151218	3	73	50	1	1	1.0,0.706,1.0,1.0	1.0,1.0,1.0,0.804	-0.025	chr8:121975991-121978579(+)	chr8:121975991-121978602(+)
ENSMUSG00000025316	Banp	chr8	+	122007090	122007162	122007099	122007162	122005551	122005682	492	17122110	1642213	9302723	12202221	59	50	0.947127	1	0.474,0.718,0.447,0.395	0.389,0.56,0.51,0.481	0.023	chr8:122005682-122007091(+)	chr8:122005682-122007100(+)
ENSMUSG00000030316	Tamm41	chr6	-	115012157	115012323	115012157	115012319	115016082	115016228	493	62919075	5314	661008885	514	54	50	0.372467	1	0.92,0.966,0.988,0.946	1.0,0.949,0.988,0.952	-0.017	chr6:115012323-115016083(-)	chr6:115012319-115016083(-)
ENSMUSG00000060477	Irak2	chr6	+	113690782	113691071	113690812	113691071	113686757	113686958	494	29312526	4512	24221521	232	80	50	0.354484	1	0.819,0.795,0.94,0.89	1.0,0.873,0.758,0.868	-0.014	chr6:113686958-113690783(+)	chr6:113686958-113690813(+)
ENSMUSG00000062753	AI413582	chr17	-	27564148	27564254	27564148	27564215	27564384	27564410	495	163176176134	42022	168140152131	131044	89	50	0.419094	1	0.958,0.832,0.98,0.974	0.879,0.887,0.955,0.948	0.019	chr17:27564254-27564385(-)	chr17:27564215-27564385(-)
ENSMUSG00000062753	AI413582	chr17	-	27564148	27564339	27564148	27564254	27564561	27564750	496	7865	2420	12894	3110	100	50	0.0918242	0.603962	0.636,0.5,0.6,1.0	0.667,0.8,0.818,1.0	-0.137	chr17:27564339-27564562(-)	chr17:27564254-27564562(-)
ENSMUSG00000062753	AI413582	chr17	-	27564148	27564410	27564148	27564254	27564561	27564750	497	11513511075	2420	9710310188	3110	100	50	0.290139	1	0.966,0.944,0.965,1.0	0.942,0.981,0.981,1.0	-0.007	chr17:27564410-27564562(-)	chr17:27564254-27564562(-)
ENSMUSG00000062753	AI413582	chr17	-	27564148	27564410	27564148	27564339	27564561	27564750	498	11013110572	1001	85979384	10	100	50	1	1	0.982,1.0,1.0,0.973	1.0,1.0,0.979,1.0	-0.006	chr17:27564410-27564562(-)	chr17:27564339-27564562(-)
ENSMUSG00000030276	Ttll3	chr6	+	113394580	113394860	113394691	113394860	113393102	113393194	499	0	40	100	3100	100	50	1	1	NA,NA,0.0,NA	0.0,0.333,NA,NA	-0.167	chr6:113393194-113394581(+)	chr6:113393194-113394692(+)
ENSMUSG00000030276	Ttll3	chr6	+	113399663	113399771	113399704	113399771	113398769	113398884	501	1020	100	2001	100	91	50	1	1	1.0,0.0,1.0,NA	1.0,0.0,NA,1.0	0	chr6:113398884-113399664(+)	chr6:113398884-113399705(+)
ENSMUSG00000030276	Ttll3	chr6	+	113399666	113399771	113399704	113399771	113398769	113398884	502	1020	100	3001	100	88	50	1	1	1.0,0.0,1.0,NA	1.0,0.0,NA,1.0	0	chr6:113398884-113399667(+)	chr6:113398884-113399705(+)
ENSMUSG00000001632	Brpf1	chr6	+	113319037	113319361	113319040	113319361	113318411	113318721	503	31251821	62766145	18211718	59626562	53	50	0.16745	0.844298	0.321,0.237,0.218,0.306	0.223,0.242,0.198,0.215	0.051	chr6:113318721-113319038(+)	chr6:113318721-113319041(+)
ENSMUSG00000030269	Mtmr14	chr6	+	113277789	113277945	113277830	113277945	113270521	113270701	504	117797989	67109	128899191	7400	91	50	0.000156616	0.00695623	0.915,0.861,0.813,0.845	0.909,0.924,1.0,1.0	-0.1	chr6:113270701-113277790(+)	chr6:113270701-113277831(+)
ENSMUSG00000034269	Setd5	chr6	+	113110316	113110525	113110373	113110525	113109884	113109990	505	34325758	47604852	41484243	33484137	100	50	0.203194	0.933985	0.266,0.211,0.373,0.358	0.383,0.333,0.339,0.368	-0.054	chr6:113109990-113110317(+)	chr6:113109990-113110374(+)
ENSMUSG00000030102	Itpr1	chr6	+	108432645	108432696	108432648	108432696	108431460	108431496	510	4332	1010	1134	2012	53	50	0.115312	0.677307	0.791,1.0,0.739,1.0	0.321,1.0,0.739,0.654	0.204	chr6:108431496-108432646(+)	chr6:108431496-108432649(+)
ENSMUSG00000022536	Glyr1	chr16	-	5021337	5021448	5021337	5021430	5026507	5026607	512	202185232182	33462840	188184214196	45444441	68	50	0.193492	0.912737	0.818,0.747,0.859,0.77	0.754,0.755,0.781,0.779	0.031	chr16:5021448-5026508(-)	chr16:5021430-5026508(-)
ENSMUSG00000030067	Foxp1	chr6	-	98945346	98945426	98945346	98945423	98945533	98945735	513	74627175	24212128	71756563	28252324	53	50	0.610577	1	0.744,0.736,0.761,0.716	0.705,0.739,0.727,0.712	0.018	chr6:98945426-98945534(-)	chr6:98945423-98945534(-)
ENSMUSG00000030067	Foxp1	chr6	-	99009903	99010057	99009903	99010054	99015423	99015510	514	55503958	2320	63484760	4000	53	50	0.53244	1	0.963,0.94,0.948,1.0	0.937,1.0,1.0,1.0	-0.022	chr6:99010057-99015424(-)	chr6:99010054-99015424(-)
ENSMUSG00000030067	Foxp1	chr6	-	99015423	99015513	99015423	99015510	99016527	99016665	515	35382137	5858	34413442	6233	53	50	0.0182278	0.224052	0.868,0.818,0.798,0.814	0.842,0.951,0.914,0.93	-0.085	chr6:99015513-99016528(-)	chr6:99015510-99016528(-)
ENSMUSG00000030067	Foxp1	chr6	-	99075853	99076045	99075853	99075949	99162838	99163018	516	56574541	210106	70655467	117129	100	50	0.712546	1	0.933,0.74,0.692,0.774	0.761,0.823,0.692,0.788	0.019	chr6:99076045-99162839(-)	chr6:99075949-99162839(-)
ENSMUSG00000001415	Smg5	chr3	+	88349110	88349267	88349141	88349267	88347517	88347596	537	51104	821129299	86113	89885986	81	50	0.079721	0.554819	0.036,0.057,0.0,0.024	0.053,0.04,0.103,0.021	-0.025	chr3:88347596-88349111(+)	chr3:88347596-88349142(+)
ENSMUSG00000064065	Ipcef1	chr10	-	6980246	6980286	6980246	6980283	6996529	6996576	539	1400	10	1000	1000	53	50	1	1	1.0,1.0,0.0,NA	0.485,NA,NA,NA	0.182	chr10:6980286-6996530(-)	chr10:6980283-6996530(-)
ENSMUSG00000029068	Ccnl2	chr4	+	155818538	155820428	155820328	155820428	155817922	155817987	545	101929484	37313740	43605259	41514749	100	50	1.45226e-07	2.66448e-05	0.577,0.597,0.56,0.512	0.344,0.37,0.356,0.376	0.2	chr4:155817987-155818539(+)	chr4:155817987-155820329(+)
ENSMUSG00000034744	Nagk	chr6	+	83798482	83798654	83798543	83798654	83797955	83798097	546	3123	42414137	1051	45323135	100	50	0.622573	1	0.034,0.012,0.024,0.039	0.011,0.0,0.075,0.014	0.002	chr6:83798097-83798483(+)	chr6:83798097-83798544(+)
ENSMUSG00000030032	Wdr54	chr6	-	83155069	83155240	83155069	83155136	83155477	83155540	548	1200	1000	0	11	100	50	1	1	0.333,1.0,NA,NA	NA,NA,0.0,0.0	0.666	chr6:83155240-83155478(-)	chr6:83155136-83155478(-)
ENSMUSG00000037190	Cyb561d2	chr9	-	107541002	107541069	107541002	107541040	107541496	107541650	552	2312	51565563	1822	54535249	79	50	0.154706	0.804434	0.024,0.033,0.011,0.02	0.012,0.087,0.024,0.025	-0.015	chr9:107541069-107541497(-)	chr9:107541040-107541497(-)
ENSMUSG00000055850	Rnf181	chr6	-	72360874	72361013	72360874	72360949	72361121	72361226	557	10151411	4141	61689	3542	100	50	0.17734	0.876281	0.556,0.882,0.636,0.846	0.5,0.615,0.5,0.692	0.153	chr6:72361013-72361122(-)	chr6:72360949-72361122(-)
ENSMUSG00000056305	Usp39	chr6	-	72338392	72338549	72338392	72338529	72339966	72340061	559	1120	213184256223	1320	172219198204	70	50	1	1	0.003,0.004,0.006,0.0	0.004,0.01,0.007,0.0	-0.002	chr6:72338549-72339967(-)	chr6:72338529-72339967(-)
ENSMUSG00000052337	Immt	chr6	+	71852729	71852867	71852762	71852867	71851771	71851880	562	11010895111	151144185165	120129156114	118116106108	83	50	1.41192e-06	0.000164157	0.305,0.311,0.236,0.288	0.38,0.401,0.47,0.389	-0.125	chr6:71851880-71852730(+)	chr6:71851880-71852763(+)
ENSMUSG00000052337	Immt	chr6	+	71852729	71852867	71852765	71852867	71851771	71851880	563	117114103115	27253725	122132159117	30252033	86	50	0.24917	1	0.716,0.726,0.618,0.728	0.703,0.754,0.822,0.673	-0.041	chr6:71851880-71852730(+)	chr6:71851880-71852766(+)
ENSMUSG00000052337	Immt	chr6	+	71852762	71852867	71852765	71852867	71851771	71851880	564	158150193169	27253725	120119109111	30252033	53	50	0.0503383	0.434713	0.847,0.85,0.831,0.864	0.791,0.818,0.837,0.76	0.047	chr6:71851880-71852763(+)	chr6:71851880-71852766(+)
ENSMUSG00000020166	Cnot2	chr10	-	116549032	116549175	116549032	116549105	116581452	116581483	566	163128165138	28416047	146155148156	32122023	100	50	0.000233001	0.0095435	0.744,0.61,0.579,0.595	0.695,0.866,0.787,0.772	-0.148	chr10:116549175-116581453(-)	chr10:116549105-116581453(-)
ENSMUSG00000054474	Thnsl2	chr6	-	71138650	71138822	71138650	71138803	71139748	71139943	568	100	1473	0	4320	69	50	1	1	0.0,0.153,0.0,0.0	0.0,0.0,0.0,NA	0.038	chr6:71138822-71139749(-)	chr6:71138803-71139749(-)
ENSMUSG00000023027	Atf1	chr15	+	100245231	100245345	100245244	100245345	100232732	100232831	569	6020	9710082112	3311	115919484	63	50	0.863313	1	0.047,0.0,0.019,0.0	0.02,0.025,0.008,0.009	0.001	chr15:100232831-100245232(+)	chr15:100232831-100245245(+)
ENSMUSG00000074643	Cpne1	chr2	-	156073798	156074035	156073798	156073992	156074175	156074309	570	174204189177	2162	209205233213	1001	93	50	0.21077	0.948947	0.979,0.991,0.944,0.979	0.991,1.0,1.0,0.991	-0.022	chr2:156074035-156074176(-)	chr2:156073992-156074176(-)
ENSMUSG00000002320	Tm9sf1	chr14	-	55637858	55638132	55637858	55638070	55640384	55640570	576	342270306292	1010	243300275256	100	100	50	1	1	0.994,1.0,0.994,1.0	1.0,0.993,1.0,1.0	-0.001	chr14:55638132-55640385(-)	chr14:55638070-55640385(-)
ENSMUSG00000028943	Espn	chr4	-	152130768	152131294	152130768	152130961	152134160	152134441	580	1010	1020	0	111	100	50	1	1	0.333,NA,0.2,NA	NA,0.0,0.0,0.0	0.267	chr4:152131294-152134161(-)	chr4:152130961-152134161(-)
ENSMUSG00000023952	Gtpbp2	chr17	+	46167222	46167394	46167341	46167394	46166591	46166650	582	11311710377	8437	9212784103	3674	100	50	0.813941	1	0.876,0.936,0.945,0.846	0.939,0.914,0.857,0.928	-0.009	chr17:46166650-46167223(+)	chr17:46166650-46167342(+)
ENSMUSG00000035203	Epn1	chr7	+	5083662	5083982	5083729	5083982	5082017	5082121	589	324321330319	16313523	251318238281	24282118	100	50	0.913462	1	0.91,0.838,0.825,0.874	0.839,0.85,0.85,0.886	0.005	chr7:5082121-5083663(+)	chr7:5082121-5083730(+)
ENSMUSG00000035203	Epn1	chr7	+	5095887	5095974	5095890	5095974	5095642	5095753	590	136157171120	133150182126	136156138134	126158158148	53	50	0.764779	1	0.491,0.497,0.47,0.473	0.505,0.482,0.452,0.461	0.008	chr7:5095753-5095888(+)	chr7:5095753-5095891(+)
ENSMUSG00000038886	Man2a2	chr7	-	80363153	80363336	80363153	80363238	80363466	80363669	596	121130132131	61386	13691101102	2656	100	50	0.152575	0.796548	0.91,0.833,0.892,0.916	0.971,0.883,0.91,0.895	-0.027	chr7:80363336-80363467(-)	chr7:80363238-80363467(-)
ENSMUSG00000005312	Ubqln1	chr13	-	58179552	58179668	58179552	58179662	58183181	58183324	597	201170226166	8111213	136170159139	79113	56	50	0.461826	1	0.957,0.932,0.944,0.919	0.945,0.944,0.928,0.976	-0.01	chr13:58179668-58183182(-)	chr13:58179662-58183182(-)
ENSMUSG00000044433	Camsap3	chr8	+	3602367	3602425	3602370	3602425	3602185	3602279	598	200	2212	20	33	53	50	1	1	0.0,0.485,0.0,0.0	NA,NA,0.386,0.0	-0.072	chr8:3602279-3602368(+)	chr8:3602279-3602371(+)
ENSMUSG00000030083	Abtb1	chr6	-	88838117	88838285	88838117	88838265	88838379	88838478	603	119145102116	7424	13510292110	3031	70	50	0.0220373	0.256972	0.924,0.963,0.973,0.954	0.97,1.0,0.956,0.987	-0.025	chr6:88838285-88838380(-)	chr6:88838265-88838380(-)
ENSMUSG00000030083	Abtb1	chr6	-	88840709	88840781	88840709	88840765	88840837	88840900	604	1520	43324334	222	44423634	66	50	0.577458	1	0.017,0.106,0.034,0.0	0.0,0.035,0.04,0.043	0.01	chr6:88840781-88840838(-)	chr6:88840765-88840838(-)
ENSMUSG00000002797	Ggct	chr6	-	54986832	54986968	54986832	54986960	54989499	54989557	608	111076	100	1351010	0	58	50	1	1	1.0,0.896,1.0,1.0	1.0,1.0,1.0,1.0	-0.026	chr6:54986968-54989500(-)	chr6:54986960-54989500(-)
ENSMUSG00000024913	Lrp5	chr19	-	3610038	3610238	3610038	3610209	3612197	3612521	611	10110812170	6103	122868986	4222	79	50	0.870703	1	0.914,0.986,1.0,0.937	0.951,0.965,0.966,0.965	-0.002	chr19:3610238-3612198(-)	chr19:3610209-3612198(-)
ENSMUSG00000041594	Tmtc4	chr14	-	122933327	122933519	122933327	122933407	122941304	122941436	612	1220	10121511	100	15141010	100	50	0.369451	1	0.048,0.077,0.062,0.0	0.0,0.034,0.0,0.0	0.038	chr14:122933519-122941305(-)	chr14:122933407-122941305(-)
ENSMUSG00000041594	Tmtc4	chr14	-	122944673	122944860	122944673	122944838	122945507	122945600	613	301	1871112	1011	215911	72	50	1	1	0.0,0.229,0.0,0.055	0.032,0.0,0.072,0.059	0.03	chr14:122944860-122945508(-)	chr14:122944838-122945508(-)
ENSMUSG00000024862	Klc2	chr19	-	5110196	5110264	5110196	5110258	5110366	5110416	621	12172418	10	20121319	0	56	50	1	1	1.0,1.0,0.955,1.0	1.0,1.0,1.0,1.0	-0.011	chr19:5110264-5110367(-)	chr19:5110258-5110367(-)
ENSMUSG00000022779	Top3b	chr16	+	16887831	16888005	16887857	16888005	16887576	16887723	623	244212225198	1717912	200193183214	5285	76	50	0.000183836	0.00789897	0.904,0.891,0.943,0.916	0.963,0.984,0.938,0.966	-0.049	chr16:16887723-16887832(+)	chr16:16887723-16887858(+)
ENSMUSG00000042810	Krba1	chr6	+	48405233	48405389	48405236	48405389	48403990	48404140	626	4593	2000	7664	10	53	50	1	1	0.654,1.0,1.0,1.0	1.0,1.0,0.85,1.0	-0.049	chr6:48404140-48405234(+)	chr6:48404140-48405237(+)
ENSMUSG00000042810	Krba1	chr6	+	48406296	48406431	48406299	48406431	48405233	48405389	627	4734	100	81059	0	53	50	1	1	1.0,0.868,1.0,1.0	1.0,1.0,1.0,1.0	-0.033	chr6:48405389-48406297(+)	chr6:48405389-48406300(+)
ENSMUSG00000057691	Zfp746	chr6	-	48062394	48064952	48062394	48064949	48066428	48066554	628	13162914	10232226	14141411	23202117	53	50	0.265066	1	0.551,0.396,0.554,0.337	0.365,0.398,0.386,0.379	0.078	chr6:48064952-48066429(-)	chr6:48064949-48066429(-)
ENSMUSG00000072653	Zfp783	chr6	+	47945836	47945962	47945882	47945962	47945428	47945751	629	8101111	92115	56713	612166	96	50	0.119225	0.683864	0.316,0.723,0.342,0.534	0.303,0.207,0.186,0.53	0.172	chr6:47945751-47945837(+)	chr6:47945751-47945883(+)
ENSMUSG00000009894	Snap47	chr11	-	59442791	59442912	59442791	59442841	59449914	59449999	630	110	0	1000	110	100	50	1	1	NA,1.0,1.0,NA	1.0,0.0,0.0,NA	0.667	chr11:59442912-59449915(-)	chr11:59442841-59449915(-)
ENSMUSG00000026434	Nucks1	chr1	+	131929612	131929762	131929615	131929762	131928063	131928216	631	211199270215	75638279	184211178203	50625358	53	50	0.210006	0.948698	0.726,0.749,0.756,0.72	0.776,0.763,0.76,0.768	-0.029	chr1:131928216-131929613(+)	chr1:131928216-131929616(+)
ENSMUSG00000032376	Usp3	chr9	-	66542512	66542626	66542512	66542613	66543945	66544028	632	48474735	110	65384244	520	63	50	0.269286	1	1.0,0.974,0.974,1.0	1.0,0.858,0.943,1.0	0.037	chr9:66542626-66543946(-)	chr9:66542613-66543946(-)
ENSMUSG00000038034	Igsf8	chr1	+	172319292	172319423	172319331	172319423	172318553	172318967	633	14098198131	100	10298105122	0	89	50	1	1	1.0,0.982,1.0,1.0	1.0,1.0,1.0,1.0	-0.004	chr1:172318967-172319293(+)	chr1:172318967-172319332(+)
ENSMUSG00000016477	E2f3	chr13	-	29918575	29918795	29918575	29918777	29920113	29920225	634	24304432	1362	19171732	5533	68	50	0.0776646	0.549209	0.946,0.88,0.844,0.922	0.736,0.714,0.806,0.887	0.112	chr13:29918795-29920114(-)	chr13:29918777-29920114(-)
ENSMUSG00000061436	Hipk2	chr6	-	38721454	38721597	38721454	38721594	38729920	38730042	639	14111211	3042	26221414	2241	53	50	0.538573	1	0.815,1.0,0.739,0.838	0.925,0.912,0.768,0.93	-0.036	chr6:38721597-38729921(-)	chr6:38721594-38729921(-)
ENSMUSG00000061436	Hipk2	chr6	-	38730868	38731076	38730868	38730995	38737357	38737520	640	145159	8678	21252315	4349	100	50	0.00690171	0.118106	0.467,0.294,0.517,0.36	0.724,0.806,0.742,0.455	-0.272	chr6:38731076-38737358(-)	chr6:38730995-38737358(-)
ENSMUSG00000008373	Prpf31	chr7	+	3638630	3638758	3638648	3638758	3636661	3636751	644	252303277276	1771111	249243241224	85812	68	50	0.387028	1	0.916,0.97,0.949,0.949	0.958,0.973,0.957,0.932	-0.009	chr7:3636751-3638631(+)	chr7:3636751-3638649(+)
ENSMUSG00000049339	Retreg2	chr1	+	75144303	75144439	75144391	75144439	75143922	75143953	647	310273310240	7775	219295206266	610811	100	50	0.0965491	0.616084	0.957,0.951,0.957,0.96	0.948,0.937,0.928,0.924	0.022	chr1:75143953-75144304(+)	chr1:75143953-75144392(+)
ENSMUSG00000001017	Chtop	chr3	-	90503095	90503282	90503095	90503279	90506107	90506261	649	164144176159	99929885	114138129105	69876789	53	50	0.451532	1	0.61,0.596,0.629,0.638	0.609,0.599,0.645,0.527	0.023	chr3:90503282-90506108(-)	chr3:90503279-90506108(-)
ENSMUSG00000001017	Chtop	chr3	-	90506107	90507258	90506107	90506261	90507544	90507626	651	112818987	173171205144	711118775	145144129146	100	50	0.279409	1	0.245,0.191,0.178,0.232	0.197,0.278,0.252,0.204	-0.021	chr3:90507258-90507545(-)	chr3:90506261-90507545(-)
ENSMUSG00000058440	Nrf1	chr6	+	30089911	30090146	30089914	30090146	30088832	30088988	654	28325433	20323120	45442429	22283119	53	50	0.965165	1	0.569,0.485,0.622,0.609	0.659,0.597,0.422,0.59	0.004	chr6:30088988-30089912(+)	chr6:30088988-30089915(+)
ENSMUSG00000015094	Npdc1	chr2	+	25407840	25408014	25407843	25408014	25407595	25407736	659	1100	0	4010	100	53	50	1	1	1.0,1.0,NA,NA	1.0,0.0,1.0,NA	0.333	chr2:25407736-25407841(+)	chr2:25407736-25407844(+)
ENSMUSG00000029534	St7	chr6	+	17850356	17852412	17852257	17852412	17848003	17848079	661	311310	57525328	4771	65774451	100	50	0.0604506	0.47319	0.026,0.096,0.028,0.152	0.03,0.043,0.074,0.01	0.036	chr6:17848079-17850357(+)	chr6:17848079-17852258(+)
ENSMUSG00000069910	Spdl1	chr11	-	34822373	34822472	34822373	34822468	34822559	34822709	662	30323728	1000	22512722	100	54	50	1	1	0.965,1.0,1.0,1.0	1.0,0.979,1.0,1.0	-0.004	chr11:34822472-34822560(-)	chr11:34822468-34822560(-)
ENSMUSG00000029638	Glcci1	chr6	+	8573181	8573298	8573184	8573298	8558499	8558586	664	75115	1611124	141033	136910	53	50	0.853496	1	0.292,0.3,0.464,0.541	0.504,0.611,0.239,0.221	0.005	chr6:8558586-8573182(+)	chr6:8558586-8573185(+)
ENSMUSG00000036138	Acaa1a	chr9	+	119348580	119348771	119348585	119348771	119347729	119347810	667	244205201197	4102	200187169159	1	55	50	1	1	0.982,0.995,1.0,0.989	1.0,1.0,1.0,0.993	-0.007	chr9:119347810-119348581(+)	chr9:119347810-119348586(+)
ENSMUSG00000034021	Pds5b	chr5	+	150801118	150801229	150801121	150801229	150800577	150801017	669	54153	75658562	31153	47677976	53	50	0.656913	1	0.059,0.055,0.143,0.044	0.057,0.134,0.056,0.036	0.005	chr5:150801017-150801119(+)	chr5:150801017-150801122(+)
ENSMUSG00000041147	Brca2	chr5	+	150568913	150569746	150568938	150569746	150567606	150567768	671	2261	23313434	222	23232418	75	50	0.297044	1	0.055,0.041,0.105,0.019	0.0,0.055,0.053,0.069	0.011	chr5:150567768-150568914(+)	chr5:150567768-150568939(+)
ENSMUSG00000030826	Bcat2	chr7	+	45585110	45585230	45585125	45585230	45584916	45585027	673	322284301274	11	284257212228	10	65	50	1	1	1.0,1.0,0.996,0.995	1.0,1.0,0.994,1.0	-0.001	chr7:45585027-45585111(+)	chr7:45585027-45585126(+)
ENSMUSG00000038777	Sema6c	chr3	+	95169528	95169713	95169581	95169713	95169163	95169381	675	10	101	0	1	100	50	1	1	NA,0.0,1.0,0.0	NA,NA,NA,0.0	0.333	chr3:95169381-95169529(+)	chr3:95169381-95169582(+)
ENSMUSG00000002944	Cd36	chr5	-	17828774	17828984	17828774	17828981	17829455	17829549	676	0	10	2321	0	53	50	1	1	NA,NA,0.0,NA	1.0,1.0,1.0,1.0	-1	chr5:17828984-17829456(-)	chr5:17828981-17829456(-)
ENSMUSG00000036180	Gatad2a	chr8	-	69916283	69916451	69916283	69916448	69916568	69916700	678	23353326	9310311685	27242629	10710610498	53	50	0.390291	1	0.189,0.243,0.212,0.224	0.192,0.176,0.191,0.218	0.023	chr8:69916451-69916569(-)	chr8:69916448-69916569(-)
ENSMUSG00000055991	Zkscan5	chr5	+	145212488	145212640	145212504	145212640	145211745	145211828	679	0	10121415	1000	1171216	66	50	1	1	0.0,0.0,0.0,0.0	0.064,0.0,0.0,0.0	-0.016	chr5:145211828-145212489(+)	chr5:145211828-145212505(+)
ENSMUSG00000034652	Cd300a	chr11	+	114894657	114894778	114894669	114894778	114893237	114893594	680	11012911376	22271914	90857068	1819149	62	50	0.960481	1	0.801,0.794,0.827,0.814	0.801,0.783,0.801,0.859	-0.002	chr11:114893594-114894658(+)	chr11:114893594-114894670(+)
ENSMUSG00000079109	Pms2	chr5	+	143911920	143912060	143911925	143912060	143909963	143910079	683	23242524	391711	22392730	68144	55	50	0.243251	1	0.875,0.708,0.572,0.665	0.769,0.816,0.637,0.872	-0.069	chr5:143910079-143911921(+)	chr5:143910079-143911926(+)
ENSMUSG00000079109	Pms2	chr5	+	143928098	143929042	143928941	143929042	143925220	143926073	685	35334045	20	31303627	0	100	50	1	1	1.0,1.0,0.909,1.0	1.0,1.0,1.0,1.0	-0.023	chr5:143926073-143928099(+)	chr5:143926073-143928942(+)
ENSMUSG00000045078	Rnf216	chr5	-	143090119	143090929	143090119	143090758	143092994	143093125	690	45313733	40254827	51354538	33345131	100	50	0.665173	1	0.36,0.383,0.278,0.379	0.436,0.34,0.306,0.38	-0.016	chr5:143090929-143092995(-)	chr5:143090758-143092995(-)
ENSMUSG00000045078	Rnf216	chr5	-	143098378	143098505	143098378	143098500	143112898	143112980	691	39413442	8182	40434231	3642	55	50	0.621842	1	0.816,0.974,0.794,0.95	0.924,0.867,0.905,0.934	-0.024	chr5:143098505-143112899(-)	chr5:143098500-143112899(-)
ENSMUSG00000078765	U2af1l4	chr7	+	30563884	30563996	30563929	30563996	30563556	30563619	692	7575	9410511673	52811	91877687	95	50	0.522346	1	0.038,0.024,0.031,0.035	0.028,0.012,0.052,0.062	-0.006	chr7:30563619-30563885(+)	chr7:30563619-30563930(+)
ENSMUSG00000078765	U2af1l4	chr7	+	30564202	30564607	30564473	30564607	30564081	30564131	694	110120150115	1010	127121124109	0	100	50	1	1	0.982,1.0,0.987,1.0	1.0,1.0,1.0,1.0	-0.008	chr7:30564131-30564203(+)	chr7:30564131-30564474(+)
ENSMUSG00000028212	Ccne2	chr4	+	11192814	11192911	11192817	11192911	11192680	11192717	695	43305557	13699	43623945	6975	53	50	0.207361	0.943727	0.757,0.825,0.852,0.857	0.871,0.867,0.84,0.895	-0.046	chr4:11192717-11192815(+)	chr4:11192717-11192818(+)
ENSMUSG00000036555	Iqce	chr5	-	140669021	140669120	140669021	140669105	140670466	140670567	696	96103	2276	7464	2041	65	50	0.163751	0.832013	0.776,0.698,0.524,0.278	0.729,1.0,0.536,0.755	-0.186	chr5:140669120-140670467(-)	chr5:140669105-140670467(-)
ENSMUSG00000025858	Get4	chr5	+	139262869	139262951	139262872	139262951	139262480	139262559	699	185206170177	19232015	151191124128	13151615	53	50	0.777695	1	0.902,0.894,0.889,0.918	0.916,0.923,0.88,0.89	-0.001	chr5:139262559-139262870(+)	chr5:139262559-139262873(+)
ENSMUSG00000004865	Srpk1	chr17	-	28599470	28600456	28599470	28599869	28600868	28600894	700	123116128130	61002	951078680	7623	100	50	0.470592	1	0.911,0.853,1.0,0.97	0.872,0.899,0.956,0.93	0.019	chr17:28600456-28600869(-)	chr17:28599869-28600869(-)
ENSMUSG00000036503	Rnf13	chr3	+	57801717	57802537	57802446	57802537	57796197	57796285	702	10	75595659	1211	74555866	100	50	1	1	0.0,0.0,0.009,0.0	0.007,0.018,0.009,0.008	-0.008	chr3:57796285-57801718(+)	chr3:57796285-57802447(+)
ENSMUSG00000027466	Rbck1	chr2	-	152319123	152319420	152319123	152319303	152322159	152322271	703	65410	254212249189	41348	203205174204	100	50	0.333145	1	0.012,0.012,0.008,0.026	0.01,0.031,0.011,0.019	-0.003	chr2:152319420-152322160(-)	chr2:152319303-152322160(-)
ENSMUSG00000029710	Ephb4	chr5	+	137362362	137362514	137362389	137362514	137361133	137361466	710	10	1	0	1001	77	50	1	1	NA,NA,1.0,0.0	0.0,NA,NA,0.0	0.5	chr5:137361466-137362363(+)	chr5:137361466-137362390(+)
ENSMUSG00000029705	Cux1	chr5	-	136312642	136313314	136312642	136313008	136314306	136314403	713	16101412	2241	15121211	2401	100	50	0.55438	1	0.8,0.714,0.636,0.857	0.789,0.6,1.0,0.846	-0.057	chr5:136313314-136314307(-)	chr5:136313008-136314307(-)
ENSMUSG00000029705	Cux1	chr5	-	136326749	136326938	136326749	136326932	136332623	136332728	714	99879875	132146146125	74916964	12312095101	56	50	0.768172	1	0.401,0.347,0.375,0.349	0.349,0.404,0.393,0.361	-0.009	chr5:136326938-136332624(-)	chr5:136326932-136332624(-)
ENSMUSG00000029705	Cux1	chr5	-	136326749	136327010	136326749	136326932	136332623	136332728	715	1067911485	132146146125	79978986	12312095101	100	50	0.257519	1	0.286,0.213,0.281,0.254	0.243,0.288,0.319,0.299	-0.029	chr5:136327010-136332624(-)	chr5:136326932-136332624(-)
ENSMUSG00000029705	Cux1	chr5	-	136326749	136327010	136326749	136326938	136332623	136332728	716	1077411085	93808871	80918584	72836458	100	50	0.521161	1	0.365,0.316,0.385,0.374	0.357,0.354,0.399,0.42	-0.022	chr5:136327010-136332624(-)	chr5:136326938-136332624(-)
ENSMUSG00000030978	Rrm1	chr7	+	102466863	102467066	102466877	102467066	102465717	102465813	717	24462931	587546614593	34412719	513576501515	64	50	0.862143	1	0.031,0.062,0.036,0.039	0.049,0.053,0.04,0.028	-0.001	chr7:102465813-102466864(+)	chr7:102465813-102466878(+)
ENSMUSG00000004947	Dtx2	chr5	+	136028498	136028572	136028501	136028572	136026469	136026607	719	13222017	4163	19121216	4351	53	50	0.838774	1	0.754,0.954,0.759,0.842	0.818,0.791,0.694,0.938	0.017	chr5:136026607-136028499(+)	chr5:136026607-136028502(+)
ENSMUSG00000025607	Copg2	chr6	-	30749405	30749504	30749405	30749501	30749760	30749899	723	126129111108	121366	11410811898	7297	53	50	0.212063	0.950437	0.908,0.903,0.946,0.944	0.939,0.981,0.925,0.93	-0.019	chr6:30749504-30749761(-)	chr6:30749501-30749761(-)
ENSMUSG00000005378	Bud23	chr5	-	135053548	135053722	135053548	135053638	135056027	135056086	724	138159	209205243188	918108	178225211182	100	50	0.820694	1	0.03,0.019,0.03,0.023	0.025,0.038,0.023,0.022	-0.001	chr5:135053722-135056028(-)	chr5:135053638-135056028(-)
ENSMUSG00000038708	Golga4	chr9	+	118566907	118566979	118566958	118566979	118565556	118565667	725	239	37415157	420	37514939	100	50	0.035946	0.354351	0.0,0.024,0.029,0.073	0.0,0.038,0.02,0.0	0.017	chr9:118565667-118566908(+)	chr9:118565667-118566959(+)
ENSMUSG00000022701	Ccdc191	chr16	+	43905345	43905483	43905350	43905483	43898089	43898231	726	19689	20	8101213	0	55	50	1	1	1.0,1.0,0.784,1.0	1.0,1.0,1.0,1.0	-0.054	chr16:43898231-43905346(+)	chr16:43898231-43905351(+)
ENSMUSG00000036270	Edc4	chr8	+	105888117	105888308	105888120	105888308	105887953	105888045	727	715137	59546550	6984	46504949	53	50	0.265216	1	0.101,0.208,0.159,0.117	0.11,0.145,0.133,0.072	0.031	chr8:105888045-105888118(+)	chr8:105888045-105888121(+)
ENSMUSG00000036270	Edc4	chr8	+	105888595	105888755	105888598	105888755	105888387	105888518	728	34532715	34374834	23272819	22333431	53	50	0.97318	1	0.485,0.575,0.347,0.294	0.497,0.436,0.437,0.366	-0.009	chr8:105888518-105888596(+)	chr8:105888518-105888599(+)
ENSMUSG00000036270	Edc4	chr8	+	105889624	105889729	105889672	105889729	105889103	105889540	730	97118125110	16262117	7510699100	626912	98	50	0.194037	0.913394	0.756,0.698,0.752,0.768	0.864,0.675,0.849,0.81	-0.056	chr8:105889540-105889625(+)	chr8:105889540-105889673(+)
ENSMUSG00000036270	Edc4	chr8	+	105889630	105889729	105889672	105889729	105889103	105889540	731	52524947	16262117	32525046	626912	92	50	0.15513	0.804763	0.639,0.521,0.559,0.6	0.743,0.521,0.751,0.676	-0.093	chr8:105889540-105889631(+)	chr8:105889540-105889673(+)
ENSMUSG00000060261	Gtf2i	chr5	-	134243506	134243599	134243506	134243587	134243900	134243956	732	184125224150	159129169144	157167146175	13115597134	62	50	0.325842	1	0.483,0.439,0.517,0.457	0.491,0.465,0.548,0.513	-0.03	chr5:134243599-134243901(-)	chr5:134243587-134243901(-)
ENSMUSG00000025337	Sbds	chr5	-	130253938	130254009	130253938	130254004	130255209	130255310	736	41392221	4111	20331618	4341	55	50	0.0613206	0.478605	0.903,0.973,0.952,0.95	0.82,0.909,0.784,0.942	0.081	chr5:130254009-130255210(-)	chr5:130254004-130255210(-)
ENSMUSG00000058729	Lin9	chr1	+	180665782	180665940	180665808	180665940	180661476	180661602	739	28584439	200	36323036	110	76	50	1	1	1.0,0.95,1.0,1.0	1.0,0.955,0.952,1.0	0.011	chr1:180661602-180665783(+)	chr1:180661602-180665809(+)
ENSMUSG00000058729	Lin9	chr1	+	180668763	180668883	180668765	180668883	180667324	180667458	740	29253822	0	15242422	200	52	50	1	1	1.0,1.0,1.0,1.0	1.0,0.92,1.0,1.0	0.02	chr1:180667458-180668764(+)	chr1:180667458-180668766(+)
ENSMUSG00000029478	Ncor2	chr5	-	125037273	125037379	125037273	125037376	125037860	125037997	741	51595739	67138	35453536	13848	53	50	0.374391	1	0.889,0.888,0.805,0.821	0.718,0.841,0.892,0.809	0.036	chr5:125037379-125037861(-)	chr5:125037376-125037861(-)
ENSMUSG00000029478	Ncor2	chr5	-	125041795	125041967	125041795	125041964	125042744	125042865	742	4787	39283138	7643	27312721	53	50	0.951327	1	0.088,0.191,0.196,0.148	0.197,0.154,0.123,0.119	0.008	chr5:125041967-125042745(-)	chr5:125041964-125042745(-)
ENSMUSG00000029478	Ncor2	chr5	-	125050910	125051118	125050910	125051058	125055732	125055875	743	2410715	80524457	11141512	39424633	100	50	0.204008	0.934383	0.13,0.088,0.074,0.116	0.124,0.143,0.14,0.154	-0.038	chr5:125051118-125055733(-)	chr5:125051058-125055733(-)
ENSMUSG00000038126	Mphosph9	chr5	-	124259967	124260215	124259967	124260169	124260934	124261035	747	49333932	1010	23423116	200	96	50	1	1	0.962,1.0,0.953,1.0	1.0,0.916,1.0,1.0	0	chr5:124260215-124260935(-)	chr5:124260169-124260935(-)
ENSMUSG00000038126	Mphosph9	chr5	-	124320844	124320998	124320844	124320954	124324873	124325137	748	927924	99109	8181412	99118	94	50	0.541948	1	0.347,0.615,0.324,0.587	0.321,0.515,0.404,0.444	0.047	chr5:124320998-124324874(-)	chr5:124320954-124324874(-)
ENSMUSG00000035949	Fbxw2	chr2	-	34822557	34823067	34822557	34822975	34825961	34826070	749	948010676	8494	91715961	5264	100	50	0.527793	1	0.855,0.909,0.855,0.905	0.901,0.947,0.831,0.884	-0.01	chr2:34823067-34825962(-)	chr2:34822975-34825962(-)
ENSMUSG00000000915	Hip1r	chr5	+	123996475	123996581	123996519	123996581	123996230	123996371	750	420	29473523	5210	41393427	94	50	0.514816	1	0.0,0.043,0.029,0.0	0.061,0.027,0.015,0.0	-0.008	chr5:123996371-123996476(+)	chr5:123996371-123996520(+)
ENSMUSG00000029422	Rsrc2	chr5	-	123733555	123733635	123733555	123733630	123736558	123736681	754	152160186140	2	131184122108	302	55	50	1	1	1.0,1.0,1.0,0.985	1.0,0.982,1.0,0.98	0.006	chr5:123733635-123736559(-)	chr5:123733630-123736559(-)
ENSMUSG00000029422	Rsrc2	chr5	-	123740671	123740884	123740671	123740862	123742778	123742856	755	52492839	10151410	39393732	7151211	72	50	0.911281	1	0.783,0.694,0.581,0.73	0.795,0.644,0.682,0.669	-0.001	chr5:123740884-123742779(-)	chr5:123740862-123742779(-)
ENSMUSG00000029422	Rsrc2	chr5	-	123740671	123740884	123740671	123740862	123743637	123743678	756	2218822	163136142109	19251614	112135126120	72	50	0.404394	1	0.086,0.084,0.038,0.123	0.105,0.114,0.081,0.075	-0.011	chr5:123740884-123743638(-)	chr5:123740862-123743638(-)
ENSMUSG00000029440	Psmd9	chr5	+	123246193	123246282	123246196	123246282	123241831	123241933	758	1048910790	110	771049697	1300	53	50	1	1	1.0,0.988,0.99,1.0	0.986,0.97,1.0,1.0	0.005	chr5:123241933-123246194(+)	chr5:123241933-123246197(+)
ENSMUSG00000038384	Setd1b	chr5	+	123158392	123158944	123158515	123158944	123157752	123157867	760	788212282	1	71635352	0	100	50	1	1	1.0,1.0,1.0,0.976	1.0,1.0,1.0,1.0	-0.006	chr5:123157867-123158393(+)	chr5:123157867-123158516(+)
ENSMUSG00000021902	Phf7	chr14	-	31240858	31241009	31240858	31240983	31241725	31241827	761	41	30293216	2	29222013	76	50	0.443242	1	0.0,0.0,0.076,0.039	0.0,0.0,0.0,0.092	0.006	chr14:31241009-31241726(-)	chr14:31240983-31241726(-)
ENSMUSG00000061518	Cox5b	chr1	+	36692430	36692550	36692450	36692550	36692210	36692284	762	6769	7569671051847	27310	896854762772	70	50	1	1	0.006,0.005,0.004,0.008	0.002,0.006,0.003,0.009	0.001	chr1:36692284-36692431(+)	chr1:36692284-36692451(+)
ENSMUSG00000029462	Vps29	chr5	+	122360012	122360204	122360028	122360204	122354421	122354476	765	224202238213	0	211228199186	201	66	50	1	1	1.0,1.0,1.0,1.0	1.0,0.989,1.0,0.993	0.005	chr5:122354476-122360013(+)	chr5:122354476-122360029(+)
ENSMUSG00000043036	Ccdc63	chr5	-	122129722	122129955	122129722	122129892	122130288	122130405	767	1	2000	101	132	100	50	1	1	0.0,NA,NA,1.0	NA,0.333,0.0,0.2	0.322	chr5:122129955-122130289(-)	chr5:122129892-122130289(-)
ENSMUSG00000074129	Rpl13a	chr7	-	45126114	45126253	45126114	45126237	45126477	45126537	768	88610051001809		725808723748	1.02141e+17	66	50	0.631658	1	0.056,0.055,0.054,0.057	0.051,0.053,0.055,0.054	0.002	chr7:45126253-45126478(-)	chr7:45126237-45126478(-)
ENSMUSG00000074129	Rpl13a	chr7	-	45126708	45126827	45126708	45126794	45126990	45127092	769	263292273206	1.15131e+18	252275217228	1.03761e+17	83	50	0.355201	1	0.014,0.013,0.013,0.012	0.014,0.015,0.014,0.014	-0.001	chr7:45126827-45126991(-)	chr7:45126794-45126991(-)
ENSMUSG00000074129	Rpl13a	chr7	-	45126990	45127092	45126990	45127087	45127208	45127274	770	1.05291e+18	3301112	9.4811e+16	18141214	55	50	1	1	1.0,0.997,0.999,0.999	0.998,0.999,0.999,0.998	0	chr7:45127092-45127209(-)	chr7:45127087-45127209(-)
ENSMUSG00000043733	Ptpn11	chr5	-	121144529	121144696	121144529	121144684	121149102	121149234	772	45485749	59497258	38514041	55687559	62	50	0.125135	0.705648	0.381,0.441,0.39,0.405	0.358,0.377,0.301,0.359	0.056	chr5:121144696-121149103(-)	chr5:121144684-121149103(-)
ENSMUSG00000040370	Etfrf1	chr6	+	145214521	145215271	145215183	145215271	145211155	145211252	774	3261	31202422	4120	1916237	100	50	0.414686	1	0.046,0.048,0.111,0.022	0.095,0.03,0.042,0.0	0.015	chr6:145211252-145214522(+)	chr6:145211252-145215184(+)
ENSMUSG00000038831	Ralgps1	chr2	-	33146569	33146653	33146569	33146650	33158909	33159036	777	201	0	323	10	53	50	1	1	NA,1.0,NA,1.0	NA,1.0,0.654,1.0	0.115	chr2:33146653-33158910(-)	chr2:33146650-33158910(-)
ENSMUSG00000018076	Med13l	chr5	+	118751839	118752009	118751866	118752009	118751530	118751754	778	818610	27182223	1212810	24241221	77	50	0.742428	1	0.161,0.394,0.15,0.22	0.245,0.245,0.302,0.236	-0.026	chr5:118751754-118751840(+)	chr5:118751754-118751867(+)
ENSMUSG00000032898	Fbxo21	chr5	+	118000316	118000528	118000337	118000528	117995369	117995502	780	13131115	28171814	15131211	21121220	71	50	0.620166	1	0.246,0.35,0.301,0.43	0.335,0.433,0.413,0.279	-0.033	chr5:117995502-118000317(+)	chr5:117995502-118000338(+)
ENSMUSG00000041638	Gcn1l1	chr5	+	115614860	115614974	115614863	115614974	115614330	115614600	782	92939078	210	79797296	2110	53	50	1	1	1.0,0.978,0.988,1.0	0.974,0.987,0.985,1.0	0.005	chr5:115614600-115614861(+)	chr5:115614600-115614864(+)
ENSMUSG00000067274	Rplp0	chr5	+	115560718	115561004	115560740	115561004	115559786	115559888	783	12131110	6358753873696043	2121011	6097685853975715	72	50	1	1	0.001,0.001,0.001,0.001	0.0,0.001,0.001,0.001	0	chr5:115559888-115560719(+)	chr5:115559888-115560741(+)
ENSMUSG00000017286	Glod4	chr11	-	76239451	76239572	76239451	76239504	76240872	76240922	784	584558642491	1	522552485520	0	100	50	1	1	1.0,1.0,1.0,0.996	1.0,1.0,1.0,1.0	-0.001	chr11:76239572-76240873(-)	chr11:76239504-76240873(-)
ENSMUSG00000032827	Ppp1r9a	chr6	+	5134638	5134932	5134688	5134932	5134016	5134174	786	1010	1030	1001	1020	100	50	1	1	0.333,NA,0.143,NA	0.333,NA,0.0,1.0	-0.206	chr6:5134174-5134639(+)	chr6:5134174-5134689(+)
ENSMUSG00000036819	Jmjd4	chr11	+	59453791	59454059	59453827	59454059	59453510	59453645	789	1012916	10	5151514	21	86	50	1	1	1.0,1.0,0.84,1.0	1.0,1.0,0.813,0.891	0.034	chr11:59453645-59453792(+)	chr11:59453645-59453828(+)
ENSMUSG00000036819	Jmjd4	chr11	+	59453791	59454059	59453877	59454059	59453510	59453645	790	18142225	312109	720266	53412	100	50	0.962358	1	0.75,0.368,0.524,0.581	0.412,0.769,0.765,0.2	0.019	chr11:59453645-59453792(+)	chr11:59453645-59453878(+)
ENSMUSG00000036819	Jmjd4	chr11	+	59453827	59454059	59453877	59454059	59453510	59453645	791	1082016	312109	312166	53412	100	50	0.868717	1	0.625,0.25,0.5,0.471	0.231,0.667,0.667,0.2	0.02	chr11:59453645-59453828(+)	chr11:59453645-59453878(+)
ENSMUSG00000037907	Ankrd13b	chr11	-	77473010	77473200	77473010	77473168	77473280	77473411	796	323	19343330	2140	21272524	82	50	0.971461	1	0.0,0.051,0.036,0.057	0.055,0.022,0.089,0.0	-0.005	chr11:77473200-77473281(-)	chr11:77473168-77473281(-)
ENSMUSG00000029500	Pgam5	chr5	-	110265511	110265645	110265511	110265642	110265739	110265828	798	75506248	53556561	40505246	40474341	53	50	0.568665	1	0.572,0.462,0.474,0.426	0.485,0.501,0.533,0.514	-0.025	chr5:110265645-110265740(-)	chr5:110265642-110265740(-)
ENSMUSG00000014668	Chfr	chr5	+	110140353	110140453	110140375	110140453	110136050	110136194	799	75397754	11998	70747467	4278	72	50	0.00944081	0.145172	0.826,0.751,0.856,0.824	0.924,0.963,0.88,0.853	-0.091	chr5:110136194-110140354(+)	chr5:110136194-110140376(+)
ENSMUSG00000014668	Chfr	chr5	+	110158798	110158918	110158801	110158918	110154836	110154982	801	83675751	16161915	56567265	19142221	53	50	0.385157	1	0.83,0.798,0.739,0.762	0.735,0.791,0.755,0.745	0.026	chr5:110154982-110158799(+)	chr5:110154982-110158802(+)
ENSMUSG00000030051	Aplf	chr6	-	87658432	87658565	87658432	87658555	87658840	87658988	805	42505548	1	43696058	0	60	50	1	1	1.0,1.0,1.0,0.976	1.0,1.0,1.0,1.0	-0.006	chr6:87658565-87658841(-)	chr6:87658555-87658841(-)
ENSMUSG00000033540	Idua	chr5	+	108680294	108680497	108680394	108680497	108680110	108680206	809	39153019	2642	31293034	4224	100	50	0.464182	1	0.907,0.556,0.789,0.826	0.795,0.879,0.882,0.81	-0.072	chr5:108680206-108680295(+)	chr5:108680206-108680395(+)
ENSMUSG00000029267	Mtf2	chr5	+	108104394	108104530	108104425	108104530	108104265	108104318	813	37116	110107112121	10878	106907093	81	50	0.122044	0.694157	0.017,0.039,0.057,0.03	0.055,0.052,0.058,0.05	-0.018	chr5:108104318-108104395(+)	chr5:108104318-108104426(+)
ENSMUSG00000016933	Plcg1	chr2	+	160761735	160761923	160761738	160761923	160761559	160761648	815	170	33544335	3024	25223235	53	50	0.404664	1	0.0,0.017,0.133,0.0	0.102,0.0,0.056,0.097	-0.026	chr2:160761648-160761736(+)	chr2:160761648-160761739(+)
ENSMUSG00000033773	Rpap2	chr5	+	107641782	107642922	107641953	107642922	107633062	107633131	816	210712	0	12181910	4121	100	50	0.000161826	0.00710777	1.0,1.0,1.0,1.0	0.6,0.9,0.826,0.833	0.21	chr5:107633131-107641783(+)	chr5:107633131-107641954(+)
ENSMUSG00000029279	Brdt	chr5	+	107370154	107370329	107370157	107370329	107369302	107369364	817	2001	10	1000	0	53	50	1	1	1.0,NA,0.0,1.0	1.0,NA,NA,NA	-0.333	chr5:107369364-107370155(+)	chr5:107369364-107370158(+)
ENSMUSG00000036781	Rps27l	chr9	+	66948638	66948717	66948640	66948717	66947586	66947697	820	712156	10	11151414	100	52	50	1	1	1.0,1.0,0.935,1.0	1.0,0.935,1.0,1.0	0	chr9:66947697-66948639(+)	chr9:66947697-66948641(+)
ENSMUSG00000032478	Nme6	chr9	+	109835269	109835414	109835317	109835414	109833195	109833295	824	4219	82666342	2230	71717057	98	50	0.0263721	0.286398	0.024,0.015,0.008,0.099	0.014,0.014,0.021,0.0	0.024	chr9:109833295-109835270(+)	chr9:109833295-109835318(+)
ENSMUSG00000032478	Nme6	chr9	+	109841926	109842087	109841961	109842087	109841475	109841515	825	239217214205	3024	207209189161	3312	85	50	0.845323	1	0.979,1.0,0.984,0.968	0.976,0.976,0.991,0.979	0.002	chr9:109841515-109841927(+)	chr9:109841515-109841962(+)
ENSMUSG00000047539	Fbxo28	chr1	-	182317809	182318005	182317809	182317958	182326253	182326392	826	48486039	7542	56514543	3331	97	50	0.103664	0.644312	0.779,0.832,0.885,0.91	0.906,0.898,0.885,0.957	-0.06	chr1:182318005-182326254(-)	chr1:182317958-182326254(-)
ENSMUSG00000047539	Fbxo28	chr1	-	182317809	182318005	182317809	182317936	182329873	182329983	827	25294318	0	35352625	10	100	50	1	1	1.0,1.0,1.0,1.0	1.0,1.0,0.929,1.0	0.018	chr1:182318005-182329874(-)	chr1:182317936-182329874(-)
ENSMUSG00000043940	Wdfy3	chr5	-	101886960	101887070	101886960	101887067	101888086	101888316	833	1010178	200	913119	10	53	50	1	1	1.0,0.825,1.0,1.0	1.0,1.0,0.912,1.0	-0.022	chr5:101887070-101888087(-)	chr5:101887067-101888087(-)
ENSMUSG00000009687	Fxyd5	chr7	-	31037820	31037931	31037820	31037928	31039037	31039094	836	207247212199	716670696594	240177201203	649601581594	53	50	0.633863	1	0.214,0.258,0.223,0.24	0.259,0.217,0.246,0.244	-0.008	chr7:31037931-31039038(-)	chr7:31037928-31039038(-)
ENSMUSG00000009687	Fxyd5	chr7	-	31040182	31040257	31040182	31040221	31041396	31041457	837	9519311039877	36553431	950894880783	16151921	86	50	4.75255e-06	0.000447306	0.939,0.908,0.947,0.943	0.972,0.972,0.964,0.956	-0.032	chr7:31040257-31041397(-)	chr7:31040221-31041397(-)
ENSMUSG00000009687	Fxyd5	chr7	-	31040182	31040272	31040182	31040221	31041396	31041457	838	425457467394	36553431	454395406361	16151921	100	50	5.79851e-06	0.000533058	0.855,0.806,0.873,0.864	0.934,0.929,0.914,0.896	-0.069	chr7:31040272-31041397(-)	chr7:31040221-31041397(-)
ENSMUSG00000009687	Fxyd5	chr7	-	31040182	31040272	31040182	31040257	31041396	31041457	839	9102217	535484594500	19181312	515517487434	65	50	0.473526	1	0.013,0.016,0.028,0.025	0.028,0.026,0.02,0.021	-0.003	chr7:31040272-31041397(-)	chr7:31040257-31041397(-)
ENSMUSG00000009687	Fxyd5	chr7	-	31041396	31041469	31041396	31041457	31042046	31042078	840	36252328	613114	28282427	3594	62	50	0.194267	0.913394	0.829,0.608,0.628,0.85	0.883,0.819,0.683,0.845	-0.079	chr7:31041469-31042047(-)	chr7:31041457-31042047(-)
ENSMUSG00000019564	Arid3a	chr10	+	79950627	79950924	79950633	79950924	79949364	79949612	842	55443632	0	47253535	101	56	50	1	1	1.0,1.0,1.0,1.0	1.0,0.957,1.0,0.969	0.019	chr10:79949612-79950628(+)	chr10:79949612-79950634(+)
ENSMUSG00000059939	9430015G10Rik	chr4	+	156121932	156122416	156122350	156122416	156119163	156119239	843	79515449	112288	32464639	49107	100	50	0.641769	1	0.782,0.537,0.771,0.754	0.8,0.719,0.697,0.736	-0.027	chr4:156119239-156121933(+)	chr4:156119239-156122351(+)
ENSMUSG00000032267	Usp28	chr9	+	49023905	49024085	49023980	49024085	49018371	49018467	844	24121420	2111	30192423	0	100	50	0.0172708	0.220418	0.857,0.857,0.875,0.909	1.0,1.0,1.0,1.0	-0.125	chr9:49018467-49023906(+)	chr9:49018467-49023981(+)
ENSMUSG00000014418	Hps5	chr7	-	46767093	46767207	46767093	46767139	46768032	46768152	845	47475737	2022	29324536	220	100	50	0.284018	1	0.922,1.0,0.934,0.902	1.0,0.889,0.918,1.0	-0.012	chr7:46767207-46768033(-)	chr7:46767139-46768033(-)
ENSMUSG00000014418	Hps5	chr7	-	46778020	46778199	46778020	46778100	46779071	46779160	846	24222430	9245	17343525	4334	100	50	0.248812	1	0.571,0.846,0.75,0.75	0.68,0.85,0.854,0.758	-0.056	chr7:46778199-46779072(-)	chr7:46778100-46779072(-)
ENSMUSG00000014418	Hps5	chr7	-	46783470	46783717	46783470	46783683	46786509	46786643	847	8194	9201119	6195	24212119	84	50	0.337742	1	0.346,0.029,0.328,0.111	0.13,0.028,0.203,0.135	0.08	chr7:46783717-46786510(-)	chr7:46783683-46786510(-)
ENSMUSG00000086968	4933431E20Rik	chr3	-	107894050	107894228	107894050	107894215	107894588	107894656	848	140	100	112	201	63	50	1	1	NA,0.442,1.0,NA	NA,0.284,1.0,0.613	0.089	chr3:107894228-107894589(-)	chr3:107894215-107894589(-)
ENSMUSG00000086968	4933431E20Rik	chr3	-	107894050	107894228	107894050	107894208	107894860	107894992	850	53	0	2626	100	70	50	1	1	NA,NA,1.0,1.0	1.0,0.811,1.0,1.0	0.047	chr3:107894228-107894861(-)	chr3:107894208-107894861(-)
ENSMUSG00000022679	Mpv17l	chr16	+	13946528	13946587	13946557	13946587	13944665	13944736	852	201	2625	201	3213	79	50	1	1	0.0,0.174,0.0,0.112	0.0,0.388,0.0,0.174	-0.069	chr16:13944736-13946529(+)	chr16:13944736-13946558(+)
ENSMUSG00000027329	Spef1	chr2	-	131171901	131172025	131171901	131171949	131172203	131172258	854	37105420	1032	1851518	0	100	50	0.145248	0.777999	0.949,1.0,0.9,0.833	1.0,1.0,1.0,1.0	-0.08	chr2:131172025-131172204(-)	chr2:131171949-131172204(-)
ENSMUSG00000058013	Sept11	chr5	+	93173469	93173537	93173472	93173537	93167499	93167687	855	5317	2	172	300	53	50	1	1	1.0,1.0,1.0,0.768	NA,0.239,1.0,1.0	0.196	chr5:93167687-93173470(+)	chr5:93167687-93173473(+)
ENSMUSG00000029547	Ints1	chr5	-	139771536	139771729	139771536	139771723	139771815	139771921	856	27253430	31384743	19303026	53373240	56	50	0.597618	1	0.437,0.37,0.392,0.384	0.242,0.42,0.456,0.367	0.024	chr5:139771729-139771816(-)	chr5:139771723-139771816(-)
ENSMUSG00000029415	Sdad1	chr5	-	92298191	92298261	92298191	92298258	92300061	92300163	857	94101114106	4301	78867689	1502	53	50	0.752249	1	0.957,0.969,1.0,0.99	0.987,0.942,1.0,0.977	0.003	chr5:92298261-92300062(-)	chr5:92298258-92300062(-)
ENSMUSG00000036810	Cnep1r1	chr8	+	88130340	88130401	88130346	88130401	88129694	88129804	861	1	626083102	0	65775058	56	50	1	1	0.0,0.0,0.0,0.009	0.0,0.0,0.0,0.0	0.002	chr8:88129804-88130341(+)	chr8:88129804-88130347(+)
ENSMUSG00000035505	Cox18	chr5	-	90218911	90219036	90218911	90219033	90219359	90219523	866	23282018	12181714	39222316	21252413	53	50	0.416232	1	0.644,0.595,0.526,0.548	0.637,0.454,0.475,0.537	0.052	chr5:90219036-90219360(-)	chr5:90219033-90219360(-)
ENSMUSG00000052512	Nav2	chr7	+	49461908	49462017	49461911	49462017	49458095	49458208	869	10779	4262	11537	4463	53	50	0.309071	1	0.702,0.768,0.524,0.809	0.722,0.541,0.321,0.688	0.133	chr7:49458208-49461909(+)	chr7:49458208-49461912(+)
ENSMUSG00000048012	Zfp473	chr7	-	44737965	44738034	44737965	44738031	44739502	44739635	878	2211	122	1211	1000	53	50	0.0175783	0.222003	1.0,0.654,0.321,0.321	0.485,1.0,1.0,1.0	-0.297	chr7:44738034-44739503(-)	chr7:44738031-44739503(-)
ENSMUSG00000026883	Dab2ip	chr2	+	35719852	35720741	35719918	35720741	35718759	35718938	879	16163024	2442	19232514	2001	100	50	0.000257793	0.0102935	0.8,0.667,0.789,0.857	0.826,1.0,1.0,0.875	-0.147	chr2:35718938-35719853(+)	chr2:35718938-35719919(+)
ENSMUSG00000066232	Ipo7	chr7	+	110042785	110042885	110042828	110042885	110041980	110042115	881	394331444381	21188	332386335371	2234	93	50	0.00350534	0.0714257	0.991,0.942,0.968,0.962	0.989,0.99,0.984,0.98	-0.02	chr7:110042115-110042786(+)	chr7:110042115-110042829(+)
ENSMUSG00000029428	Stx2	chr5	-	128996361	128996461	128996361	128996457	128999509	128999587	883	52565733	100	43705442	200	54	50	1	1	1.0,0.981,1.0,1.0	1.0,0.97,1.0,1.0	0.003	chr5:128996461-128999510(-)	chr5:128996457-128999510(-)
ENSMUSG00000043411	Usp48	chr4	+	137615712	137615841	137615715	137615841	137613681	137613861	887	41424745	36222537	52654741	39483527	53	50	0.726653	1	0.518,0.643,0.639,0.534	0.557,0.561,0.559,0.589	0.017	chr4:137613861-137615713(+)	chr4:137613861-137615716(+)
ENSMUSG00000043411	Usp48	chr4	+	137625156	137625287	137625159	137625287	137623273	137623388	888	22193017	59687161	23272819	60675760	53	50	0.388281	1	0.26,0.209,0.285,0.208	0.266,0.275,0.317,0.23	-0.032	chr4:137623388-137625157(+)	chr4:137623388-137625160(+)
ENSMUSG00000043411	Usp48	chr4	+	137637759	137637890	137637764	137637890	137634897	137635008	889	54477352	71233	63746464	131165	55	50	0.492134	1	0.875,0.781,0.957,0.94	0.815,0.859,0.907,0.921	0.013	chr4:137635008-137637760(+)	chr4:137635008-137637765(+)
ENSMUSG00000043411	Usp48	chr4	+	137655158	137655249	137655222	137655249	137652957	137653006	891	153	1017310980	2733	95117107107	100	50	0.465914	1	0.0,0.007,0.022,0.018	0.01,0.029,0.014,0.014	-0.005	chr4:137653006-137655159(+)	chr4:137653006-137655223(+)
ENSMUSG00000025199	Chuk	chr19	-	44078888	44079266	44078888	44078985	44081945	44081995	892	3635	33363439	6666	51493328	100	50	0.415752	1	0.043,0.077,0.042,0.06	0.056,0.058,0.083,0.097	-0.018	chr19:44079266-44081946(-)	chr19:44078985-44081946(-)
ENSMUSG00000025533	Asl	chr5	-	130013400	130013533	130013400	130013515	130013962	130014025	895	112	78819866	3001	80765265	68	50	1	1	0.0,0.009,0.007,0.022	0.027,0.0,0.0,0.011	0	chr5:130013533-130013963(-)	chr5:130013515-130013963(-)
ENSMUSG00000070733	Fryl	chr5	-	73068723	73068914	73068723	73068911	73069882	73070004	896	23141715	2215	15191914	212	53	50	0.0920744	0.604602	0.916,0.868,0.941,0.739	1.0,0.9,0.947,0.868	-0.063	chr5:73068914-73069883(-)	chr5:73068911-73069883(-)
ENSMUSG00000070733	Fryl	chr5	-	73071104	73071309	73071104	73071306	73072735	73072921	897	16172210	95514	22122220	4966	53	50	0.311407	1	0.626,0.762,0.806,0.403	0.838,0.557,0.776,0.759	-0.083	chr5:73071309-73072736(-)	chr5:73071306-73072736(-)
ENSMUSG00000040950	Mgl2	chr11	+	70135048	70135162	70135051	70135162	70134118	70134263	898	41363730	98566154	49472228	72825568	53	50	0.839424	1	0.283,0.378,0.364,0.344	0.391,0.351,0.274,0.28	0.018	chr11:70134263-70135049(+)	chr11:70134263-70135052(+)
ENSMUSG00000029209	Gnpda2	chr5	-	69579507	69579692	69579507	69579686	69584973	69585156	902	21191918	2613	31182921	3437	56	50	0.643865	1	0.904,0.739,0.944,0.843	0.902,0.801,0.896,0.728	0.026	chr5:69579692-69584974(-)	chr5:69579686-69584974(-)
ENSMUSG00000029209	Gnpda2	chr5	-	69579507	69582293	69579507	69579686	69584973	69585156	903	2614	2613	2483	3437	100	50	0.978734	1	0.333,0.333,0.333,0.4	0.25,0.333,0.571,0.176	0.017	chr5:69582293-69584974(-)	chr5:69579686-69584974(-)
ENSMUSG00000029209	Gnpda2	chr5	-	69579507	69582293	69579507	69579692	69584973	69585156	904	1414	20171918	240	29162518	100	50	0.126356	0.709496	0.024,0.105,0.026,0.1	0.0,0.059,0.074,0.0	0.03	chr5:69582293-69584974(-)	chr5:69579692-69584974(-)
ENSMUSG00000052656	Rnf103	chr6	+	71508685	71510881	71508868	71510881	71505733	71505849	907	6425	815149	6235	1351013	100	50	0.671925	1	0.273,0.118,0.067,0.217	0.188,0.167,0.13,0.161	0.007	chr6:71505849-71508686(+)	chr6:71505849-71508869(+)
ENSMUSG00000029191	Rfc1	chr5	-	65278710	65278823	65278710	65278820	65279456	65279814	911	82597271	44504348	70674750	55424335	53	50	0.396514	1	0.637,0.527,0.612,0.583	0.546,0.601,0.508,0.574	0.032	chr5:65278823-65279457(-)	chr5:65278820-65279457(-)
ENSMUSG00000029191	Rfc1	chr5	-	65301932	65302052	65301932	65302010	65302975	65303208	912	0	887711082	2000	951088272	92	50	1	1	0.0,0.0,0.0,0.0	0.011,0.0,0.0,0.0	-0.003	chr5:65302052-65302976(-)	chr5:65302010-65302976(-)
ENSMUSG00000003545	Fosb	chr7	-	19307119	19307440	19307119	19307323	19309305	19310046	914	1521935667	300	339237107130	4010	100	50	1	1	1.0,0.97,1.0,1.0	0.977,1.0,0.982,1.0	0.003	chr7:19307440-19309306(-)	chr7:19307323-19309306(-)
ENSMUSG00000042831	Alkbh6	chr7	+	30309985	30310054	30310027	30310054	30309480	30309559	915	9613411482	3211	68957464	1012	92	50	1	1	0.946,0.973,0.984,0.978	0.974,1.0,0.976,0.946	-0.004	chr7:30309559-30309986(+)	chr7:30309559-30310028(+)
ENSMUSG00000042831	Alkbh6	chr7	+	30312505	30312707	30312590	30312707	30312236	30312388	916	17211713	35496053	14302025	37404044	100	50	0.0257949	0.282457	0.195,0.176,0.124,0.109	0.159,0.273,0.2,0.221	-0.062	chr7:30312388-30312506(+)	chr7:30312388-30312591(+)
ENSMUSG00000032727	Mier3	chr13	+	111711685	111711780	111711688	111711780	111709725	111709807	922	27241522	1126	14152521	2232	53	50	0.517692	1	0.962,0.958,0.876,0.776	0.868,0.876,0.887,0.908	0.008	chr13:111709807-111711686(+)	chr13:111709807-111711689(+)
ENSMUSG00000005339	Fcer1a	chr1	-	173225299	173225557	173225299	173225514	173226726	173226747	923	1433298	100	73635127	0	93	50	1	1	1.0,0.947,1.0,1.0	1.0,1.0,1.0,1.0	-0.013	chr1:173225557-173226727(-)	chr1:173225514-173226727(-)
ENSMUSG00000029169	Dhx15	chr5	-	52157454	52157577	52157454	52157569	52160229	52160421	926	410431453395	29183128	341423359332	21221714	58	50	0.196067	0.915056	0.924,0.954,0.926,0.924	0.933,0.943,0.948,0.953	-0.012	chr5:52157577-52160230(-)	chr5:52157569-52160230(-)
ENSMUSG00000017264	Exosc10	chr4	+	148581757	148581834	148581761	148581834	148581101	148581163	928	130127169126	5034	96112134107	1222	54	50	0.277476	1	0.96,1.0,0.981,0.967	0.989,0.981,0.984,0.98	-0.006	chr4:148581163-148581758(+)	chr4:148581163-148581762(+)
ENSMUSG00000025609	Mkln1	chr6	+	31432935	31433131	31432938	31433131	31431139	31431249	929	9141	957811688	3262	108839894	53	50	0.871791	1	0.082,0.012,0.032,0.011	0.026,0.022,0.055,0.02	0.003	chr6:31431249-31432936(+)	chr6:31431249-31432939(+)
ENSMUSG00000039753	Fbxl5	chr5	-	43760706	43760855	43760706	43760852	43762816	43762942	931	47313235	0	37384227	110	53	50	1	1	1.0,1.0,1.0,1.0	1.0,0.973,0.975,1.0	0.013	chr5:43760855-43762817(-)	chr5:43760852-43762817(-)
ENSMUSG00000030091	Nup210	chr6	-	91013069	91014496	91013069	91013316	91015823	91015907	933	728717687710	71296742	745647683633	32394145	100	50	0.0875243	0.585751	0.837,0.925,0.837,0.894	0.921,0.892,0.893,0.876	-0.022	chr6:91014496-91015824(-)	chr6:91013316-91015824(-)
ENSMUSG00000030091	Nup210	chr6	-	91060561	91060735	91060561	91060603	91062717	91062939	935	657543630530	5552	636542626585	5377	100	50	0.411876	1	0.985,0.982,0.984,0.993	0.985,0.989,0.978,0.977	0.004	chr6:91060735-91062718(-)	chr6:91060603-91062718(-)
ENSMUSG00000020097	Sgpl1	chr10	-	61101680	61102063	61101680	61101801	61102567	61102714	938	4412	59466355	2212	53554762	100	50	0.284809	1	0.033,0.042,0.008,0.018	0.019,0.018,0.011,0.016	0.009	chr10:61102063-61102568(-)	chr10:61101801-61102568(-)
ENSMUSG00000029915	Clec5a	chr6	-	40579372	40579479	40579372	40579476	40581799	40581936	940	93754747	0	87746140	1010	53	50	1	1	1.0,1.0,1.0,1.0	0.988,1.0,0.983,1.0	0.007	chr6:40579479-40581800(-)	chr6:40579476-40581800(-)
ENSMUSG00000004642	Slbp	chr5	-	33645499	33646069	33645499	33645637	33649742	33649847	943	289307368356	5052	289361309296	3641	100	50	0.590871	1	0.967,1.0,0.974,0.989	0.98,0.968,0.975,0.993	0.003	chr5:33646069-33649743(-)	chr5:33645637-33649743(-)
ENSMUSG00000037373	Ctbp1	chr5	-	33247753	33248686	33247753	33248683	33249106	33249224	945	238234298278	55647892	237283260291	46645647	53	50	0.00769366	0.127786	0.803,0.775,0.783,0.74	0.829,0.807,0.814,0.854	-0.051	chr5:33248686-33249107(-)	chr5:33248683-33249107(-)
ENSMUSG00000041870	Ankrd13a	chr5	+	114797852	114797914	114797854	114797914	114796833	114796915	950	925907930788	3013	830884754813	3111	52	50	1	1	0.997,1.0,0.999,0.996	0.996,0.999,0.999,0.999	0	chr5:114796915-114797853(+)	chr5:114796915-114797855(+)
ENSMUSG00000041870	Ankrd13a	chr5	+	114798517	114798651	114798520	114798651	114797852	114797914	951	108115118101	737785801641	1229186112	678719611629	53	50	0.69673	1	0.121,0.121,0.122,0.129	0.145,0.107,0.117,0.144	-0.005	chr5:114797914-114798518(+)	chr5:114797914-114798521(+)
ENSMUSG00000006169	Clint1	chr11	+	45907839	45908044	45907893	45908044	45906180	45906467	952	90579589	244298329261	1141279891	223243206229	100	50	1.05067e-05	0.000814376	0.156,0.087,0.126,0.146	0.204,0.207,0.192,0.166	-0.064	chr11:45906467-45907840(+)	chr11:45906467-45907894(+)
ENSMUSG00000029149	Krtcap3	chr5	+	31253093	31253197	31253097	31253197	31252894	31253002	955	430	1103	1661	1422	54	50	0.433794	1	0.0,0.787,1.0,0.0	0.481,0.581,0.735,0.316	-0.081	chr5:31253002-31253094(+)	chr5:31253002-31253098(+)
ENSMUSG00000029145	Eif2b4	chr5	-	31192152	31192288	31192152	31192284	31192581	31192625	956	76639473	1030	75755463	111	54	50	1	1	0.986,1.0,0.967,1.0	1.0,0.986,0.98,0.983	0.001	chr5:31192288-31192582(-)	chr5:31192284-31192582(-)
ENSMUSG00000029145	Eif2b4	chr5	-	31192581	31192770	31192581	31192625	31192992	31193139	957	13201510	11380107104	12151217	811058394	100	50	0.767238	1	0.054,0.111,0.066,0.046	0.069,0.067,0.067,0.083	-0.002	chr5:31192770-31192993(-)	chr5:31192625-31192993(-)
ENSMUSG00000029177	Cenpa	chr5	+	30673266	30673443	30673292	30673443	30672981	30673059	960	20191111	377433444440	924811	419460434412	76	50	0.374209	1	0.034,0.028,0.016,0.016	0.014,0.033,0.012,0.017	0.005	chr5:30673059-30673267(+)	chr5:30673059-30673293(+)
ENSMUSG00000030000	Add2	chr6	+	86082711	86082813	86082714	86082813	86078056	86078114	962	35335749	841210	25875148	7201910	53	50	0.179174	0.879324	0.805,0.886,0.818,0.822	0.771,0.804,0.717,0.819	0.055	chr6:86078114-86082712(+)	chr6:86078114-86082715(+)
ENSMUSG00000046329	Slc25a23	chr17	-	57053783	57053955	57053783	57053942	57055273	57055385	971	0	32224320	1000	19231928	63	50	1	1	0.0,0.0,0.0,0.0	0.04,0.0,0.0,0.0	-0.01	chr17:57053955-57055274(-)	chr17:57053942-57055274(-)
ENSMUSG00000038642	Ctss	chr3	+	95529433	95529560	95529436	95529560	95526785	95526925	972	4222	26311312	3134	42362622	53	50	0.738757	1	0.127,0.057,0.127,0.136	0.063,0.026,0.098,0.146	0.029	chr3:95526925-95529434(+)	chr3:95526925-95529437(+)
ENSMUSG00000028959	Fastk	chr5	-	24441335	24441465	24441335	24441450	24441527	24441663	974	1114	86969971	1111	69897777	65	50	1	1	0.009,0.008,0.008,0.042	0.011,0.009,0.01,0.01	0.007	chr5:24441465-24441528(-)	chr5:24441450-24441528(-)
ENSMUSG00000044328	Trp53i13	chr11	-	77509075	77509367	77509075	77509273	77509597	77509726	975	6425	26173323	1301	30171026	100	50	0.00346976	0.0714257	0.103,0.105,0.029,0.098	0.016,0.081,0.0,0.019	0.055	chr11:77509367-77509598(-)	chr11:77509273-77509598(-)
ENSMUSG00000057541	Pus7	chr5	-	23748755	23748922	23748755	23748843	23749804	23749866	978	8535	11410213299	3746	6811699100	100	50	0.822084	1	0.034,0.024,0.011,0.025	0.022,0.029,0.02,0.029	-0.002	chr5:23748922-23749805(-)	chr5:23748843-23749805(-)
ENSMUSG00000020231	Dip2a	chr10	-	76279705	76279816	76279705	76279786	76279856	76279966	980	20	51273	1010	9924	80	50	1	1	0.0,0.0,0.152,0.0	0.065,0.0,0.238,0.0	-0.038	chr10:76279816-76279857(-)	chr10:76279786-76279857(-)
ENSMUSG00000020231	Dip2a	chr10	-	76286361	76286488	76286361	76286442	76287312	76287449	981	101	6152	0	2345	96	50	1	1	0.0,0.342,0.0,0.207	0.0,0.0,0.0,0.0	0.137	chr10:76286488-76287313(-)	chr10:76286442-76287313(-)
ENSMUSG00000029012	Orc5	chr5	-	22546397	22546598	22546397	22546504	22547923	22548016	984	163197186216	2221	108169108103	2283	100	50	0.00376566	0.0751801	0.976,0.98,0.979,0.991	0.964,0.977,0.871,0.945	0.042	chr5:22546598-22547924(-)	chr5:22546504-22547924(-)
ENSMUSG00000037313	Tacc3	chr5	+	33667042	33667167	33667063	33667167	33666692	33666745	985	10111016	215252191200	7131013	186176165162	71	50	0.619231	1	0.032,0.03,0.036,0.053	0.026,0.049,0.041,0.053	-0.004	chr5:33666745-33667043(+)	chr5:33666745-33667064(+)
ENSMUSG00000037313	Tacc3	chr5	+	33671664	33671785	33671725	33671785	33671403	33671510	986	400359379373	181313	355348341309	11876	100	50	0.764372	1	0.995,0.957,0.936,0.935	0.942,0.956,0.961,0.963	0	chr5:33671510-33671665(+)	chr5:33671510-33671726(+)
ENSMUSG00000089809	Rasgef1b	chr5	-	99234475	99234691	99234475	99234688	99240822	99240960	988	311	7142	1013	21	53	50	1	1	0.0,0.739,0.191,0.321	1.0,NA,0.321,0.739	-0.374	chr5:99234691-99240823(-)	chr5:99234688-99240823(-)
ENSMUSG00000028150	Rorc	chr3	+	94390399	94391206	94391073	94391206	94389474	94389596	995	1	0	0	1	100	50	1	1	NA,NA,NA,1.0	NA,NA,NA,0.0	1	chr3:94389596-94390400(+)	chr3:94389596-94391074(+)
ENSMUSG00000028864	Hgf	chr5	+	16572491	16572634	16572506	16572634	16566746	16566861	996	14201315	2366	17241420	2412	65	50	0.0405285	0.379737	0.843,0.837,0.625,0.658	0.867,0.822,0.915,0.885	-0.132	chr5:16566861-16572492(+)	chr5:16566861-16572507(+)
ENSMUSG00000045411	2410002F23Rik	chr7	+	44247237	44247416	44247250	44247416	44246786	44246823	997	39535483	61486	34453438	10141116	63	50	0.00159214	0.0425252	0.838,0.75,0.843,0.917	0.73,0.718,0.71,0.653	0.134	chr7:44246823-44247238(+)	chr7:44246823-44247251(+)
ENSMUSG00000054099	Slc25a40	chr5	+	8430411	8430518	8430430	8430518	8428628	8428688	1000	9752	1000	5793	200	69	50	1	1	0.867,1.0,1.0,1.0	1.0,0.717,1.0,1.0	0.037	chr5:8428688-8430412(+)	chr5:8428688-8430431(+)
ENSMUSG00000020807	4933427D14Rik	chr11	-	72169780	72169859	72169780	72169843	72175202	72175292	1005	1316917	200	1412912	0	66	50	1	1	1.0,0.858,1.0,1.0	1.0,1.0,1.0,1.0	-0.035	chr11:72169859-72175203(-)	chr11:72169843-72175203(-)
ENSMUSG00000060771	Tsga10	chr1	-	37841184	37841352	37841184	37841308	37842454	37842520	1006	1114155	0	616615	2400	94	50	0.0310569	0.318878	1.0,1.0,1.0,1.0	0.615,0.68,1.0,1.0	0.176	chr1:37841352-37842455(-)	chr1:37841308-37842455(-)
ENSMUSG00000021709	Erbin	chr13	-	103824719	103824926	103824719	103824848	103827906	103828023	1007	9611413380	2567	115153123126	3422	100	50	0.0226504	0.259772	0.96,0.919,0.917,0.851	0.95,0.95,0.969,0.969	-0.048	chr13:103824926-103827907(-)	chr13:103824848-103827907(-)
ENSMUSG00000000600	Krit1	chr5	+	3806418	3806568	3806464	3806568	3803183	3803483	1009	26142932	18203030	46393631	18162013	96	50	0.000393716	0.014965	0.429,0.267,0.335,0.357	0.571,0.559,0.484,0.554	-0.195	chr5:3803483-3806419(+)	chr5:3803483-3806465(+)
ENSMUSG00000058503	Fam133b	chr5	+	3559096	3559159	3559137	3559159	3558660	3558693	1012	120145131125	109913	112127113101	7869	91	50	0.442216	1	0.868,0.899,0.889,0.841	0.898,0.897,0.912,0.86	-0.017	chr5:3558693-3559097(+)	chr5:3558693-3559138(+)
ENSMUSG00000096351	Samd11	chr4	-	156250337	156250500	156250337	156250416	156251945	156252080	1013	3	10	1462	0	100	50	1	1	NA,NA,0.0,1.0	1.0,1.0,1.0,1.0	-0.5	chr4:156250500-156251946(-)	chr4:156250416-156251946(-)
ENSMUSG00000041954	Tnfrsf18	chr4	+	156028220	156028891	156028494	156028891	156027961	156028049	1015	101386	0	1216414	100	100	50	1	1	1.0,1.0,1.0,1.0	1.0,0.889,1.0,1.0	0.028	chr4:156028049-156028221(+)	chr4:156028049-156028495(+)
ENSMUSG00000029075	Tnfrsf4	chr4	+	156015299	156015452	156015385	156015452	156014901	156015009	1017	1	400	100	1010	100	50	1	1	NA,0.0,NA,1.0	0.0,1.0,0.0,NA	0.167	chr4:156015009-156015300(+)	chr4:156015009-156015386(+)
ENSMUSG00000029036	Atad3a	chr4	-	155750472	155750598	155750472	155750593	155750867	155750924	1019	154157165143	2010	163184141150	0	55	50	1	1	0.986,1.0,0.993,1.0	1.0,1.0,1.0,1.0	-0.005	chr4:155750598-155750868(-)	chr4:155750593-155750868(-)
ENSMUSG00000029036	Atad3a	chr4	-	155753566	155753769	155753566	155753636	155753881	155754047	1020	1241313	160153165132	8988	138129180175	100	50	0.285849	1	0.036,0.013,0.038,0.047	0.028,0.034,0.022,0.022	0.007	chr4:155753769-155753882(-)	chr4:155753636-155753882(-)
ENSMUSG00000029036	Atad3a	chr4	-	155753881	155754138	155753881	155754047	155754756	155754826	1021	38212715	165136163151	20232017	161173147160	100	50	0.118045	0.683332	0.103,0.072,0.076,0.047	0.058,0.062,0.064,0.05	0.016	chr4:155754138-155754757(-)	chr4:155754047-155754757(-)
ENSMUSG00000029036	Atad3a	chr4	-	155754756	155754852	155754756	155754826	155755678	155755738	1022	14876	127139151124	76104	132184118141	76	50	0.223406	0.977987	0.068,0.036,0.03,0.031	0.034,0.021,0.053,0.018	0.01	chr4:155754852-155755679(-)	chr4:155754826-155755679(-)
ENSMUSG00000029056	Pank4	chr4	+	154977202	154977354	154977211	154977354	154976582	154976670	1025	57416868	0	49724943	100	59	50	1	1	1.0,1.0,1.0,1.0	1.0,0.984,1.0,1.0	0.004	chr4:154976670-154977203(+)	chr4:154976670-154977212(+)
ENSMUSG00000029056	Pank4	chr4	+	154978920	154979025	154978954	154979025	154978392	154978442	1026	51183734	48323947	20464637	24292826	84	50	0.0200781	0.240698	0.387,0.251,0.361,0.301	0.332,0.486,0.494,0.459	-0.118	chr4:154978442-154978921(+)	chr4:154978442-154978955(+)
ENSMUSG00000039852	Rere	chr4	+	150619000	150619205	150619024	150619205	150618405	150618552	1033	15979	102826664	5559	60575057	74	50	0.419362	1	0.09,0.069,0.067,0.087	0.053,0.056,0.063,0.096	0.011	chr4:150618552-150619001(+)	chr4:150618552-150619025(+)
ENSMUSG00000039936	Pik3cd	chr4	-	149654022	149654138	149654022	149654135	149654224	149654403	1035	22162530	128109119110	16242519	1051039894	53	50	0.796547	1	0.14,0.122,0.165,0.205	0.126,0.18,0.194,0.16	-0.007	chr4:149654138-149654225(-)	chr4:149654135-149654225(-)
ENSMUSG00000039936	Pik3cd	chr4	-	149655126	149655257	149655126	149655248	149655335	149655500	1036	2423820	128125120114	25172416	1199511689	59	50	0.201839	0.931202	0.137,0.135,0.053,0.129	0.151,0.132,0.149,0.132	-0.028	chr4:149655257-149655336(-)	chr4:149655248-149655336(-)
ENSMUSG00000039936	Pik3cd	chr4	-	149655335	149655503	149655335	149655500	149655580	149655631	1037	126136154108	17142020	11210511296	1382013	53	50	0.690129	1	0.875,0.902,0.879,0.836	0.89,0.925,0.841,0.874	-0.009	chr4:149655503-149655581(-)	chr4:149655500-149655581(-)
ENSMUSG00000039936	Pik3cd	chr4	-	149657245	149657467	149657245	149657455	149658381	149658471	1038	194132156159	1220	181157183138	7021	62	50	0.704916	1	0.994,0.982,0.984,1.0	0.954,1.0,0.987,0.991	0.007	chr4:149657467-149658382(-)	chr4:149657455-149658382(-)
ENSMUSG00000018861	Fdxr	chr11	-	115271876	115271999	115271876	115271975	115272186	115272282	1039	831027086	1112	62646855	10	74	50	1	1	0.982,0.986,0.979,0.967	1.0,1.0,0.979,1.0	-0.016	chr11:115271999-115272187(-)	chr11:115271975-115272187(-)
ENSMUSG00000028960	Ube4b	chr4	-	149335111	149335335	149335111	149335303	149337384	149337519	1040	10	959711498	102	1061089692	82	50	1	1	0.0,0.0,0.005,0.0	0.0,0.006,0.0,0.013	-0.003	chr4:149335335-149337385(-)	chr4:149335303-149337385(-)
ENSMUSG00000034940	Synrg	chr11	+	83977079	83977201	83977082	83977201	83971551	83971592	1041	16191513	75105	20111615	513107	53	50	0.443369	1	0.683,0.782,0.586,0.71	0.791,0.444,0.602,0.669	0.064	chr11:83971592-83977080(+)	chr11:83971592-83977083(+)
ENSMUSG00000034940	Synrg	chr11	+	84019359	84019953	84019590	84019953	84008617	84009550	1042	141	39231924	2001	41413733	100	50	0.548032	1	0.0,0.021,0.095,0.02	0.024,0.0,0.0,0.015	0.024	chr11:84009550-84019360(+)	chr11:84009550-84019591(+)
ENSMUSG00000041459	Tardbp	chr4	-	148612381	148617705	148612381	148617635	148618664	148618791	1043	491490596559	3156	414512399407	4735	100	50	0.203736	0.934383	0.988,0.996,0.983,0.979	0.981,0.973,0.985,0.976	0.008	chr4:148617705-148618665(-)	chr4:148617635-148618665(-)
ENSMUSG00000041459	Tardbp	chr4	-	148617565	148617737	148617565	148617635	148618664	148618791	1044	462474562536	3156	402487378395	4735	100	50	0.208917	0.94599	0.987,0.996,0.983,0.978	0.98,0.972,0.984,0.975	0.008	chr4:148617737-148618665(-)	chr4:148617635-148618665(-)
ENSMUSG00000041459	Tardbp	chr4	-	148617565	148617825	148617565	148617635	148618664	148618791	1045	463478569538	3156	406494383403	4735	100	50	0.216014	0.961604	0.987,0.996,0.983,0.978	0.981,0.972,0.985,0.976	0.008	chr4:148617825-148618665(-)	chr4:148617635-148618665(-)
ENSMUSG00000041459	Tardbp	chr4	-	148617565	148617737	148617565	148617705	148618664	148618791	1046	313300326320	30173524	258312280262	12252113	82	50	0.0935569	0.608797	0.864,0.915,0.85,0.89	0.929,0.884,0.89,0.925	-0.027	chr4:148617737-148618665(-)	chr4:148617705-148618665(-)
ENSMUSG00000041459	Tardbp	chr4	-	148617565	148617825	148617565	148617705	148618664	148618791	1047	428430458432	30173524	362443397366	12252113	100	50	0.0748437	0.538936	0.877,0.927,0.867,0.9	0.938,0.899,0.904,0.934	-0.026	chr4:148617825-148618665(-)	chr4:148617705-148618665(-)
ENSMUSG00000041459	Tardbp	chr4	-	148617565	148617825	148617565	148617737	148618664	148618791	1048	431459491458	1111	397486436417	1	100	50	1	1	0.995,0.996,0.996,0.996	1.0,1.0,1.0,0.995	-0.003	chr4:148617825-148618665(-)	chr4:148617737-148618665(-)
ENSMUSG00000041459	Tardbp	chr4	-	148617565	148617825	148617565	148617705	148618673	148618791	1051	426430450432	21202420	358445396360	7121111	100	50	0.00123475	0.035115	0.91,0.915,0.904,0.915	0.962,0.949,0.947,0.942	-0.039	chr4:148617825-148618674(-)	chr4:148617705-148618674(-)
ENSMUSG00000029003	Mad2l2	chr4	+	148145103	148145196	148145125	148145196	148144653	148144727	1053	77759475	63103	69748866	2726	72	50	0.526191	1	0.899,0.946,0.867,0.946	0.96,0.88,0.968,0.884	-0.009	chr4:148144727-148145104(+)	chr4:148144727-148145126(+)
ENSMUSG00000034867	Ankrd27	chr7	+	35601489	35601646	35601505	35601646	35600314	35600425	1056	143117151131	200	106131112122	712	66	50	0.278813	1	1.0,0.978,1.0,1.0	1.0,0.934,0.988,0.979	0.019	chr7:35600425-35601490(+)	chr7:35600425-35601506(+)
ENSMUSG00000051586	Mical3	chr6	-	121021182	121021356	121021182	121021353	121022225	121022288	1057	11151115	112	9191514	200	53	50	0.42192	1	1.0,0.934,0.912,0.876	1.0,0.9,1.0,1.0	-0.044	chr6:121021356-121022226(-)	chr6:121021353-121022226(-)
ENSMUSG00000003033	Ap1m1	chr8	+	72249088	72249180	72249112	72249180	72246638	72246795	1058	250	179174196157	0	189185165179	74	50	1	1	0.0,0.008,0.017,0.0	0.0,0.0,0.0,0.0	0.006	chr8:72246795-72249089(+)	chr8:72246795-72249113(+)
ENSMUSG00000048000	Gigyf2	chr1	+	87406983	87407201	87407001	87407201	87403666	87403846	1059	33243536	19141812	25443742	1291415	68	50	0.140043	0.759383	0.561,0.558,0.588,0.688	0.605,0.782,0.66,0.673	-0.081	chr1:87403846-87406984(+)	chr1:87403846-87407002(+)
ENSMUSG00000048000	Gigyf2	chr1	+	87407534	87407723	87407537	87407723	87407292	87407455	1060	37384135	4231	32282836	1424	53	50	0.561877	1	0.897,0.947,0.928,0.971	0.968,0.868,0.93,0.895	0.02	chr1:87407455-87407535(+)	chr1:87407455-87407538(+)
ENSMUSG00000048000	Gigyf2	chr1	+	87440359	87440612	87440387	87440612	87436768	87436891	1061	2132	44554351	1122	40484035	78	50	0.616829	1	0.028,0.012,0.043,0.025	0.016,0.013,0.031,0.035	0.003	chr1:87436891-87440360(+)	chr1:87436891-87440388(+)
ENSMUSG00000042709	Atpaf2	chr11	-	60405775	60405877	60405775	60405856	60407293	60407391	1062	15352612	54479355	13201213	64756047	71	50	0.0875736	0.585751	0.164,0.344,0.164,0.133	0.125,0.158,0.123,0.163	0.059	chr11:60405877-60407294(-)	chr11:60405856-60407294(-)
ENSMUSG00000006389	Mpl	chr4	-	118455644	118455943	118455644	118455763	118456675	118456854	1063	19355527	37148	23393653	2746	100	50	0.0404521	0.379737	0.76,0.714,0.663,0.628	0.852,0.736,0.818,0.815	-0.114	chr4:118455943-118456676(-)	chr4:118455763-118456676(-)
ENSMUSG00000046862	Pramef8	chr4	+	143416619	143416952	143416639	143416952	143415348	143415413	1064	2201	3120	110	4303	70	50	0.110378	0.663105	0.323,0.588,0.0,1.0	0.0,0.192,1.0,0.0	0.18	chr4:143415413-143416620(+)	chr4:143415413-143416640(+)
ENSMUSG00000040606	Kazn	chr4	-	142147017	142147148	142147017	142147145	142150845	142151035	1065	114	4243	0	2311	53	50	0.0102331	0.151868	0.0,0.321,0.191,0.557	0.0,0.0,0.0,0.0	0.267	chr4:142147148-142150846(-)	chr4:142147145-142150846(-)
ENSMUSG00000031166	Wdr13	chrX	-	8131384	8131625	8131384	8131591	8132286	8132366	1067	40412843	3794	43514241	7227	84	50	0.251877	1	0.888,0.777,0.649,0.865	0.785,0.938,0.926,0.777	-0.062	chrX:8131625-8132287(-)	chrX:8131591-8132287(-)
ENSMUSG00000085525	Gm13166	chr4	+	146278352	146278434	146278355	146278434	146272882	146272975	1068	8700	1001	8902	1010	53	50	1	1	0.883,1.0,NA,0.0	0.883,1.0,0.0,1.0	-0.093	chr4:146272975-146278353(+)	chr4:146272975-146278356(+)
ENSMUSG00000006215	Zbtb17	chr4	+	141466347	141466557	141466398	141466557	141465976	141466107	1069	104131178127	300	13311311888	2023	100	50	0.60469	1	1.0,0.956,1.0,1.0	0.971,1.0,0.967,0.936	0.02	chr4:141466107-141466348(+)	chr4:141466107-141466399(+)
ENSMUSG00000040842	Szrd1	chr4	-	141118526	141118781	141118526	141118778	141120323	141120373	1070	79578067	5655	78646074	1532	53	50	0.054175	0.449903	0.937,0.9,0.938,0.927	0.987,0.924,0.95,0.972	-0.033	chr4:141118781-141120324(-)	chr4:141118778-141120324(-)
ENSMUSG00000040842	Szrd1	chr4	-	141118526	141118781	141118526	141118778	141139691	141139775	1071	121122151154	21161922	1218482113	1691616	53	50	0.949687	1	0.845,0.878,0.882,0.868	0.877,0.898,0.829,0.869	0	chr4:141118781-141139692(-)	chr4:141118778-141139692(-)
ENSMUSG00000028923	Necap2	chr4	-	141071580	141071717	141071580	141071695	141072528	141072637	1072	5353	4553	9759	3555	72	50	0.180848	0.881492	0.465,0.294,0.41,0.41	0.676,0.493,0.41,0.556	-0.139	chr4:141071717-141072529(-)	chr4:141071695-141072529(-)
ENSMUSG00000028923	Necap2	chr4	-	141073674	141073779	141073674	141073762	141074959	141075060	1074	287328406339	0	227321285247	100	67	50	1	1	1.0,1.0,1.0,1.0	1.0,0.996,1.0,1.0	0.001	chr4:141073779-141074960(-)	chr4:141073762-141074960(-)
ENSMUSG00000036622	Atp13a2	chr4	+	140999127	140999283	140999234	140999283	140996667	140996799	1075	210280280210	1130	150202183211	1201	100	50	1	1	0.991,0.993,0.979,1.0	0.987,0.981,1.0,0.991	0.001	chr4:140996799-140999128(+)	chr4:140996799-140999235(+)
ENSMUSG00000036622	Atp13a2	chr4	+	141006678	141006848	141006752	141006848	141006351	141006503	1077	105156176145	73726463	101151133123	49435259	100	50	0.323076	1	0.418,0.52,0.579,0.535	0.508,0.637,0.561,0.51	-0.041	chr4:141006503-141006679(+)	chr4:141006503-141006753(+)
ENSMUSG00000020817	Rabep1	chr11	+	70935120	70935182	70935126	70935182	70934404	70934594	1078	31	22242919	1213	23302025	56	50	0.123995	0.701218	0.0,0.0,0.085,0.045	0.037,0.056,0.043,0.097	-0.026	chr11:70934594-70935121(+)	chr11:70934594-70935127(+)
ENSMUSG00000051811	Cox6b2	chr7	-	4752060	4752172	4752060	4752161	4752723	4752849	1080	13486	130170162121	61284	119189186183	61	50	0.518215	1	0.076,0.019,0.039,0.039	0.04,0.049,0.034,0.018	0.008	chr7:4752172-4752724(-)	chr7:4752161-4752724(-)
ENSMUSG00000078517	Emc1	chr4	+	139365185	139365394	139365194	139365394	139363656	139363779	1081	1000	27151120	1011	19231818	59	50	1	1	0.03,0.0,0.0,0.0	0.043,0.0,0.045,0.045	-0.026	chr4:139363779-139365186(+)	chr4:139363779-139365195(+)
ENSMUSG00000028741	Mrto4	chr4	-	139349613	139349847	139349613	139349717	139350435	139350494	1083	98148	250263368251	13201619	194213174181	100	50	6.94047e-06	0.000583738	0.018,0.015,0.019,0.016	0.032,0.045,0.044,0.05	-0.026	chr4:139349847-139350436(-)	chr4:139349717-139350436(-)
ENSMUSG00000035632	Cnot3	chr7	+	3653144	3653419	3653196	3653419	3652032	3652128	1084	3312	35264135	3012	32293922	100	50	0.379645	1	0.041,0.055,0.012,0.028	0.045,0.0,0.013,0.043	0.009	chr7:3652128-3653145(+)	chr7:3652128-3653197(+)
ENSMUSG00000035632	Cnot3	chr7	+	3653144	3653419	3653199	3653419	3652032	3652128	1085	4304	161163182153	3014	154141146119	100	50	1	1	0.012,0.009,0.0,0.013	0.01,0.0,0.003,0.017	0.001	chr7:3652128-3653145(+)	chr7:3652128-3653200(+)
ENSMUSG00000035632	Cnot3	chr7	+	3653196	3653419	3653199	3653419	3652032	3652128	1086	36264137	161163182153	32293924	154141146119	53	50	0.808345	1	0.174,0.131,0.175,0.186	0.164,0.163,0.201,0.16	-0.006	chr7:3652128-3653197(+)	chr7:3652128-3653200(+)
ENSMUSG00000060862	Zbtb40	chr4	-	136988547	136988765	136988547	136988762	136991497	136991662	1089	1014	2966	110	91087	53	50	0.0500912	0.434234	0.321,0.0,0.136,0.386	0.0,0.086,0.105,0.0	0.163	chr4:136988765-136991498(-)	chr4:136988762-136991498(-)
ENSMUSG00000050106	Tmc8	chr11	+	117784109	117784195	117784112	117784195	117783770	117783920	1090	14141920	12111512	1291214	17161315	53	50	0.0415454	0.383712	0.524,0.546,0.544,0.611	0.4,0.347,0.465,0.468	0.136	chr11:117783920-117784110(+)	chr11:117783920-117784113(+)
ENSMUSG00000029822	Osbpl3	chr6	-	50336214	50336345	50336214	50336329	50344873	50345030	1091	45243913	2113	23331116	3100	66	50	0.232839	1	0.945,0.948,0.967,0.767	0.853,0.962,1.0,1.0	-0.047	chr6:50336345-50344874(-)	chr6:50336329-50344874(-)
ENSMUSG00000028671	Gale	chr4	+	135966253	135966546	135966369	135966546	135966002	135966116	1093	3544	27252724	4721	33333519	100	50	0.463362	1	0.053,0.091,0.069,0.077	0.057,0.096,0.028,0.026	0.021	chr4:135966116-135966254(+)	chr4:135966116-135966370(+)
ENSMUSG00000037266	Rsrp1	chr4	+	134926025	134926818	134926734	134926818	134925776	134925821	1097	811036061	41156	581127381	9131916	100	50	0.00320364	0.0680859	0.91,0.824,0.857,0.836	0.763,0.812,0.658,0.717	0.119	chr4:134925821-134926026(+)	chr4:134925821-134926735(+)
ENSMUSG00000063052	Lrrc40	chr3	+	158041585	158041659	158041619	158041659	158040440	158040622	1098	38354151	101	76675754	10	84	50	1	1	1.0,0.954,1.0,0.968	1.0,1.0,0.971,1.0	-0.012	chr3:158040622-158041586(+)	chr3:158040622-158041620(+)
ENSMUSG00000037443	Cep85	chr4	-	134154262	134154396	134154262	134154390	134155676	134156371	1099	23344342	210	42304731	2100	56	50	1	1	1.0,0.938,0.975,1.0	0.949,0.964,1.0,1.0	0	chr4:134154396-134155677(-)	chr4:134154390-134155677(-)
ENSMUSG00000012117	Dhdds	chr4	-	133994161	133994329	133994161	133994304	133996821	133996938	1102	3572	167127156131	41694	141121124119	75	50	0.00533934	0.0972645	0.012,0.026,0.029,0.01	0.019,0.081,0.046,0.022	-0.023	chr4:133994329-133996822(-)	chr4:133994304-133996822(-)
ENSMUSG00000003644	Rps6ka1	chr4	-	133865360	133865431	133865360	133865398	133865762	133865905	1104	806716618582	5533	748593567543	1551	83	50	1	1	0.99,0.989,0.992,0.992	0.998,0.986,0.986,0.997	-0.001	chr4:133865431-133865763(-)	chr4:133865398-133865763(-)
ENSMUSG00000039987	Phtf2	chr5	-	20764213	20764470	20764213	20764309	20765757	20765913	1107	2201	1371727	1220	820921	100	50	1	1	0.071,0.125,0.0,0.018	0.059,0.048,0.1,0.0	0.002	chr5:20764470-20765758(-)	chr5:20764309-20765758(-)
ENSMUSG00000028860	Sytl1	chr4	-	133257733	133257821	133257733	133257785	133258860	133258906	1108	37501931	1000	61322843	0	86	50	1	1	0.956,1.0,1.0,1.0	1.0,1.0,1.0,1.0	-0.011	chr4:133257821-133258861(-)	chr4:133257785-133258861(-)
ENSMUSG00000037692	Ahdc1	chr4	+	133060661	133060892	133060675	133060892	133055012	133055203	1112	1000	10	100	1111	64	50	1	1	1.0,NA,0.0,NA	0.0,0.439,0.0,0.0	0.39	chr4:133055203-133060662(+)	chr4:133055203-133060676(+)
ENSMUSG00000037692	Ahdc1	chr4	+	133060661	133060892	133060780	133060892	133055012	133055203	1113	8072	4353	1531	132	100	50	0.593413	1	0.5,0.0,0.412,0.25	1.0,0.714,0.333,0.2	-0.271	chr4:133055203-133060662(+)	chr4:133055203-133060781(+)
ENSMUSG00000037692	Ahdc1	chr4	+	133060675	133060892	133060780	133060892	133055012	133055203	1114	7082	4353	2542	132	100	50	0.177945	0.878175	0.467,0.0,0.444,0.25	1.0,0.714,0.4,0.333	-0.322	chr4:133055203-133060676(+)	chr4:133055203-133060781(+)
ENSMUSG00000007610	Gtpbp3	chr8	+	71489424	71489514	71489427	71489514	71489070	71489318	1115	200	12354128	220	17302221	53	50	0.594285	1	0.0,0.051,0.0,0.0	0.0,0.059,0.079,0.0	-0.022	chr8:71489318-71489425(+)	chr8:71489318-71489428(+)
ENSMUSG00000007610	Gtpbp3	chr8	+	71490654	71490967	71490894	71490967	71490334	71490537	1116	5807	24324638	1213119	34302424	100	50	0.000268088	0.0105975	0.094,0.111,0.0,0.084	0.15,0.178,0.186,0.158	-0.096	chr8:71490537-71490655(+)	chr8:71490537-71490895(+)
ENSMUSG00000026991	Pkp4	chr2	+	59308007	59308557	59308084	59308557	59305304	59305492	1119	34173225	1132	30271940	2311	100	50	0.86045	1	0.944,0.895,0.842,0.862	0.882,0.818,0.905,0.952	-0.003	chr2:59305492-59308008(+)	chr2:59305492-59308085(+)
ENSMUSG00000026991	Pkp4	chr2	+	59308007	59308557	59308089	59308557	59305304	59305492	1120	34163526	0	30282038	1010	100	50	1	1	1.0,1.0,1.0,1.0	0.938,1.0,0.909,1.0	0.038	chr2:59305492-59308008(+)	chr2:59305492-59308090(+)
ENSMUSG00000026991	Pkp4	chr2	+	59308084	59308557	59308089	59308557	59305304	59305492	1121	3175	0	3533	1010	55	50	1	1	1.0,1.0,1.0,1.0	0.732,1.0,0.732,1.0	0.134	chr2:59305492-59308085(+)	chr2:59305492-59308090(+)
ENSMUSG00000026991	Pkp4	chr2	+	59311693	59311913	59311696	59311913	59310101	59310290	1122	13112416	5032	15161020	1221	53	50	0.29637	1	0.71,1.0,0.883,0.883	0.934,0.883,0.825,0.95	-0.029	chr2:59310290-59311694(+)	chr2:59310290-59311697(+)
ENSMUSG00000026816	Gtf3c5	chr2	-	28567607	28567802	28567607	28567784	28568484	28568627	1123	4496	66708666	5445	56797063	68	50	0.545411	1	0.043,0.04,0.071,0.063	0.062,0.036,0.04,0.055	0.006	chr2:28567802-28568485(-)	chr2:28567784-28568485(-)
ENSMUSG00000028793	Rnf19b	chr4	+	129073498	129073643	129073501	129073643	129071736	129071942	1125	13171112	99867167	21111318	99908348	53	50	0.394351	1	0.11,0.157,0.128,0.145	0.167,0.103,0.129,0.261	-0.03	chr4:129071942-129073499(+)	chr4:129071942-129073502(+)
ENSMUSG00000018819	Lsp1	chr7	+	142488847	142488940	142488865	142488940	142488418	142488515	1126	76996878	57553534	13411513696	66606441	68	50	0.311061	1	0.495,0.57,0.588,0.628	0.599,0.585,0.61,0.633	-0.036	chr7:142488515-142488848(+)	chr7:142488515-142488866(+)
ENSMUSG00000018819	Lsp1	chr7	+	142494235	142494867	142494240	142494867	142490558	142490665	1127	1071118987	5561	132155134105	56102	55	50	0.847207	1	0.951,0.953,0.931,0.988	0.96,0.959,0.924,0.979	0	chr7:142490665-142494236(+)	chr7:142490665-142494241(+)
ENSMUSG00000061894	Zscan20	chr4	-	128589451	128590141	128589451	128589860	128591472	128591557	1128	96612	0	41368	11	100	50	1	1	1.0,1.0,1.0,1.0	1.0,1.0,0.75,0.8	0.113	chr4:128590141-128591473(-)	chr4:128589860-128591473(-)
ENSMUSG00000029560	Snx8	chr5	-	140355959	140356155	140355959	140356081	140358056	140358174	1132	102	48344332	2111	20322544	100	50	1	1	0.0,0.014,0.0,0.03	0.048,0.015,0.02,0.011	-0.013	chr5:140356155-140358057(-)	chr5:140356081-140358057(-)
ENSMUSG00000041530	Ago1	chr4	-	126460366	126460585	126460366	126460503	126460905	126461087	1133	6664	33273029	10484	22282928	100	50	0.416499	1	0.083,0.1,0.091,0.065	0.185,0.067,0.121,0.067	-0.025	chr4:126460585-126460906(-)	chr4:126460503-126460906(-)
ENSMUSG00000000037	Scml2	chrX	+	161209194	161209269	161209197	161209269	161202013	161202097	1135	20111116	10	61137	0	53	50	1	1	1.0,1.0,0.912,1.0	1.0,1.0,1.0,1.0	-0.022	chrX:161202097-161209195(+)	chrX:161202097-161209198(+)
ENSMUSG00000026766	Mmadhc	chr2	-	50292808	50292913	50292808	50292898	50296251	50296309	1137	69577557	11211215	51996645	117127	65	50	0.058314	0.464984	0.828,0.676,0.828,0.745	0.781,0.916,0.809,0.832	-0.065	chr2:50292913-50296252(-)	chr2:50292898-50296252(-)
ENSMUSG00000026766	Mmadhc	chr2	-	50292808	50292953	50292808	50292898	50296251	50296309	1138	253243325235	11211215	233323220224	117127	100	50	0.0521286	0.447788	0.92,0.853,0.931,0.887	0.914,0.958,0.902,0.941	-0.031	chr2:50292953-50296252(-)	chr2:50292898-50296252(-)
ENSMUSG00000026766	Mmadhc	chr2	-	50292808	50292953	50292808	50292913	50296251	50296309	1139	196209259192	81045	201240174195	77108	90	50	0.392681	1	0.932,0.921,0.973,0.955	0.941,0.95,0.906,0.931	0.013	chr2:50292953-50296252(-)	chr2:50292913-50296252(-)
ENSMUSG00000040464	Gtpbp10	chr5	-	5555237	5555406	5555237	5555382	5556064	5556156	1141	1204	22202624	1301	21222318	74	50	0.546628	1	0.03,0.063,0.0,0.101	0.031,0.084,0.0,0.036	0.011	chr5:5555406-5556065(-)	chr5:5555382-5556065(-)
ENSMUSG00000040464	Gtpbp10	chr5	-	5556064	5556156	5556064	5556154	5557212	5557406	1142	11242324	10	17152016	1	52	50	1	1	1.0,1.0,0.957,1.0	1.0,1.0,1.0,0.939	0.004	chr5:5556156-5557213(-)	chr5:5556154-5557213(-)
ENSMUSG00000058291	Zfp68	chr5	-	138616469	138616565	138616469	138616559	138617054	138617167	1143	19182026	5492	19273720	85114	56	50	0.646333	1	0.772,0.801,0.665,0.921	0.68,0.828,0.75,0.817	0.021	chr5:138616565-138617055(-)	chr5:138616559-138617055(-)
ENSMUSG00000058291	Zfp68	chr5	-	138616469	138616614	138616469	138616559	138617054	138617167	1144	8578	5492	2997	85114	100	50	0.382891	1	0.444,0.385,0.28,0.667	0.111,0.474,0.29,0.467	0.108	chr5:138616614-138617055(-)	chr5:138616559-138617055(-)
ENSMUSG00000058291	Zfp68	chr5	-	138616469	138616614	138616469	138616565	138617054	138617167	1145	4254	15151722	122	17193015	99	50	0.00186818	0.0470377	0.119,0.063,0.129,0.084	0.0,0.026,0.033,0.063	0.068	chr5:138616614-138617055(-)	chr5:138616565-138617055(-)
ENSMUSG00000036948	BC037034	chr5	-	138260834	138261716	138260834	138260989	138261801	138261884	1146	156122128115	73455247	136176151129	48575041	100	50	0.0934188	0.608797	0.517,0.575,0.552,0.55	0.586,0.607,0.602,0.611	-0.053	chr5:138261716-138261802(-)	chr5:138260989-138261802(-)
ENSMUSG00000030583	Sipa1l3	chr7	-	29331297	29331544	29331297	29331541	29332224	29332390	1147	1211156	19202121	1061010	28311726	53	50	0.169597	0.849707	0.373,0.342,0.403,0.212	0.252,0.154,0.357,0.266	0.075	chr7:29331544-29332225(-)	chr7:29331541-29332225(-)
ENSMUSG00000028581	Laptm5	chr4	+	130926740	130926847	130926751	130926847	130926104	130926198	1149	101	0	103	10	61	50	1	1	NA,1.0,NA,1.0	NA,1.0,0.0,1.0	0.333	chr4:130926198-130926741(+)	chr4:130926198-130926752(+)
ENSMUSG00000028581	Laptm5	chr4	+	130926740	130926847	130926770	130926847	130926104	130926198	1150	51067	125910731073997	54113	1176926963960	80	50	1	1	0.002,0.006,0.003,0.004	0.003,0.003,0.007,0.002	0	chr4:130926198-130926741(+)	chr4:130926198-130926771(+)
ENSMUSG00000028581	Laptm5	chr4	+	130926751	130926847	130926770	130926847	130926104	130926198	1151	5966	125910731073997	53120	1176926963960	69	50	1	1	0.003,0.006,0.004,0.004	0.003,0.002,0.009,0.0	0.001	chr4:130926198-130926752(+)	chr4:130926198-130926771(+)
ENSMUSG00000031353	Rbbp7	chrX	+	162769763	162769937	162769790	162769937	162768851	162768997	1152	88590010701031	86915	874968778782	5323	77	50	0.150264	0.79307	0.986,0.99,0.987,0.978	0.991,0.995,0.996,0.994	-0.009	chrX:162768997-162769764(+)	chrX:162768997-162769791(+)
ENSMUSG00000039156	Stim2	chr5	+	54110871	54111110	54111009	54111110	54110536	54110637	1153	65597750	1	60676948	0	100	50	1	1	1.0,1.0,1.0,0.962	1.0,1.0,1.0,1.0	-0.01	chr5:54110637-54110872(+)	chr5:54110637-54111010(+)
ENSMUSG00000021109	Hif1a	chr12	+	73941687	73941852	73941729	73941852	73940347	73940631	1155	9710310873	35333417	1019312597	32302133	92	50	0.56629	1	0.601,0.629,0.633,0.7	0.632,0.628,0.764,0.615	-0.019	chr12:73940631-73941688(+)	chr12:73940631-73941730(+)
ENSMUSG00000001517	Foxm1	chr6	+	128372530	128372603	128372533	128372603	128370956	128371085	1156	10	5423	1200	200	53	50	1	1	0.0,0.0,0.321,0.0	1.0,0.485,NA,NA	-0.662	chr6:128371085-128372531(+)	chr6:128371085-128372534(+)
ENSMUSG00000001517	Foxm1	chr6	+	128372530	128372603	128372533	128372603	128371967	128372012	1157	1161613	73586167	5968	77557339	53	50	0.0861432	0.580109	0.124,0.089,0.198,0.155	0.058,0.134,0.072,0.162	0.035	chr6:128372012-128372531(+)	chr6:128372012-128372534(+)
ENSMUSG00000064141	Zfp69	chr4	-	120934332	120934431	120934332	120934428	120935066	120935193	1158	1101	0	1	10	53	50	1	1	1.0,1.0,NA,1.0	NA,NA,0.0,1.0	0.5	chr4:120934431-120935067(-)	chr4:120934428-120935067(-)
ENSMUSG00000087385	Frg2f1	chr4	-	119533312	119533549	119533312	119533497	119533740	119533809	1159	202	0	1200	100	100	50	1	1	NA,1.0,NA,1.0	1.0,0.5,NA,NA	0.25	chr4:119533549-119533741(-)	chr4:119533497-119533741(-)
ENSMUSG00000060288	Ppih	chr4	-	119300009	119300202	119300009	119300183	119310758	119310847	1161	39548460	12188139129	45514942	108132111101	69	50	0.235592	1	0.189,0.308,0.305,0.252	0.232,0.219,0.242,0.232	0.032	chr4:119300202-119310759(-)	chr4:119300183-119310759(-)
ENSMUSG00000025735	Rhbdl1	chr17	-	25835276	25835377	25835276	25835353	25835469	25835582	1162	8824	4041	2433	1100	74	50	0.000128761	0.00613243	0.575,1.0,0.253,0.73	0.575,0.73,1.0,1.0	-0.187	chr17:25835377-25835470(-)	chr17:25835353-25835470(-)
ENSMUSG00000028641	P3h1	chr4	+	119241661	119241804	119241682	119241804	119241481	119241534	1163	2	49504449	0	56373743	71	50	1	1	0.0,0.0,0.0,0.028	0.0,0.0,0.0,0.0	0.007	chr4:119241534-119241662(+)	chr4:119241534-119241683(+)
ENSMUSG00000048200	Cracr2b	chr7	+	141466008	141466613	141466045	141466613	141465765	141465837	1165	4625	68585251	8632	46282746	87	50	0.143567	0.772702	0.033,0.056,0.022,0.053	0.091,0.11,0.06,0.024	-0.03	chr7:141465837-141466009(+)	chr7:141465837-141466046(+)
ENSMUSG00000062822	4833420G17Rik	chr13	+	119465279	119466304	119466073	119466304	119464564	119464690	1167	52697568	1632	33624753	4336	100	50	0.123279	0.699169	0.963,0.852,0.926,0.944	0.805,0.912,0.887,0.815	0.067	chr13:119464690-119465280(+)	chr13:119464690-119466074(+)
ENSMUSG00000033365	Ipo13	chr4	-	117894743	117894925	117894743	117894845	117895211	117895301	1169	907010384	2332	63688882	125	100	50	0.732148	1	0.957,0.921,0.945,0.955	1.0,0.971,0.957,0.891	-0.01	chr4:117894925-117895212(-)	chr4:117894845-117895212(-)
ENSMUSG00000004071	Cdip1	chr16	-	4768744	4769018	4768744	4768967	4769639	4769795	1171	70728360	121	63678065	1403	100	50	0.0935145	0.608797	1.0,0.973,0.954,0.968	0.969,0.893,1.0,0.915	0.029	chr16:4769018-4769640(-)	chr16:4768967-4769640(-)
ENSMUSG00000001472	Tcf25	chr8	+	123403146	123403806	123403149	123403806	123400624	123400697	1175	95749365	69557065	58637068	45596257	53	50	0.575006	1	0.565,0.559,0.556,0.485	0.549,0.502,0.516,0.53	0.017	chr8:123400697-123403147(+)	chr8:123400697-123403150(+)
ENSMUSG00000028688	Toe1	chr4	-	116805131	116805400	116805131	116805294	116805485	116805745	1177	5632	38435544	4660	38384034	100	50	0.698049	1	0.062,0.065,0.027,0.022	0.05,0.073,0.07,0.0	-0.004	chr4:116805400-116805486(-)	chr4:116805294-116805486(-)
ENSMUSG00000033985	Tesk2	chr4	+	116801448	116801532	116801452	116801532	116801159	116801244	1178	18188	21	915612	1000	54	50	1	1	1.0,1.0,0.787,0.881	0.893,1.0,1.0,1.0	-0.056	chr4:116801244-116801449(+)	chr4:116801244-116801453(+)
ENSMUSG00000003810	Mast2	chr4	-	116306761	116308337	116306761	116308334	116308646	116308840	1180	25193526	631111	19202428	81168	53	50	0.488263	1	0.797,0.857,0.75,0.69	0.691,0.632,0.791,0.768	0.053	chr4:116308337-116308647(-)	chr4:116308334-116308647(-)
ENSMUSG00000063882	Uqcrh	chr4	-	116069862	116070024	116069862	116069919	116070736	116070757	1184	2402268232422534	7586	2542297822602411	5426	100	50	1	1	0.994,0.996,0.995,0.995	0.996,0.997,0.998,0.995	-0.001	chr4:116070024-116070737(-)	chr4:116069919-116070737(-)
ENSMUSG00000002963	Pnkp	chr7	+	44859722	44859945	44859887	44859945	44858452	44858749	1186	407312288259	210	318252249247	7001	100	50	0.919017	1	1.0,0.987,0.993,1.0	0.958,1.0,1.0,0.992	0.007	chr7:44858749-44859723(+)	chr7:44858749-44859888(+)
ENSMUSG00000002963	Pnkp	chr7	+	44862498	44862650	44862568	44862650	44862365	44862427	1188	379247248177	6935	265244185218	8765	100	50	0.37925	1	0.969,0.932,0.976,0.947	0.943,0.946,0.939,0.956	0.01	chr7:44862427-44862499(+)	chr7:44862427-44862569(+)
ENSMUSG00000074221	Zfp568	chr7	+	30013839	30013889	30013842	30013889	29998114	29998210	1189	27262921	11726	14162114	10456	53	50	0.262346	1	0.698,0.778,0.932,0.768	0.569,0.791,0.798,0.688	0.083	chr7:29998210-30013840(+)	chr7:29998210-30013843(+)
ENSMUSG00000028708	Mknk1	chr4	+	115874619	115874814	115874758	115874814	115873210	115873306	1191	12111014189	8482	138124116138	614610	100	50	0.129734	0.720395	0.883,0.932,0.898,0.957	0.92,0.816,0.906,0.873	0.039	chr4:115873306-115874620(+)	chr4:115873306-115874759(+)
ENSMUSG00000028552	Eps15	chr4	+	109382784	109382966	109382846	109382966	109379866	109380029	1192	151171227213	0	173237185162	1000	100	50	1	1	1.0,1.0,1.0,1.0	0.989,1.0,1.0,1.0	0.003	chr4:109380029-109382785(+)	chr4:109380029-109382847(+)
ENSMUSG00000030718	Ppme1	chr7	-	100348121	100348179	100348121	100348175	100354708	100354801	1193	9079106103	1	61859281	0	54	50	1	1	1.0,1.0,1.0,0.99	1.0,1.0,1.0,1.0	-0.002	chr7:100348179-100354709(-)	chr7:100348175-100354709(-)
ENSMUSG00000028601	Echdc2	chr4	+	108172738	108172972	108172879	108172972	108172088	108172175	1195	131	4124	0	1001	100	50	1	1	0.0,0.333,0.429,0.111	0.0,NA,NA,0.0	0.218	chr4:108172175-108172739(+)	chr4:108172175-108172880(+)
ENSMUSG00000028601	Echdc2	chr4	+	108172750	108172972	108172879	108172972	108172088	108172175	1196	131	4124	0	1001	100	50	1	1	0.0,0.333,0.429,0.111	0.0,NA,NA,0.0	0.218	chr4:108172175-108172751(+)	chr4:108172175-108172880(+)
ENSMUSG00000004952	Rasa4	chr5	+	136101243	136101689	136101624	136101689	136100901	136101019	1198	105915665	100	85778550	1	100	50	1	1	1.0,0.978,1.0,1.0	1.0,1.0,1.0,0.962	0.004	chr5:136101019-136101244(+)	chr5:136101019-136101625(+)
ENSMUSG00000004952	Rasa4	chr5	+	136103546	136104006	136103836	136104006	136103279	136103424	1199	141457	65434628	48114	52395037	100	50	0.149443	0.79307	0.097,0.14,0.052,0.111	0.037,0.093,0.099,0.051	0.03	chr5:136103424-136103547(+)	chr5:136103424-136103837(+)
ENSMUSG00000015733	Capza2	chr6	+	17660728	17660827	17660748	17660827	17657172	17657252	1200	9746	546496479478	3732	470469438433	70	50	1	1	0.012,0.01,0.006,0.009	0.005,0.011,0.005,0.003	0.003	chr6:17657252-17660729(+)	chr6:17657252-17660749(+)
ENSMUSG00000028613	Lrp8	chr4	+	107847440	107847566	107847443	107847566	107843215	107843344	1201	64113	22111926	4278	16141315	53	50	0.74571	1	0.205,0.255,0.353,0.098	0.191,0.119,0.337,0.335	-0.018	chr4:107843344-107847441(+)	chr4:107843344-107847444(+)
ENSMUSG00000034853	Acot11	chr4	-	106753713	106753875	106753713	106753797	106754073	106754140	1203	0	9544	100	19915	100	50	1	1	0.0,0.0,0.0,0.0	0.0,0.053,0.0,0.0	-0.013	chr4:106753875-106754074(-)	chr4:106753797-106754074(-)
ENSMUSG00000079845	Xlr4a	chrX	-	73081473	73081601	73081473	73081588	73081984	73082067	1204	2634	10	3211	11	63	50	1	1	1.0,1.0,0.704,1.0	1.0,1.0,0.442,0.442	0.205	chrX:73081601-73081985(-)	chrX:73081588-73081985(-)
ENSMUSG00000036817	Sun1	chr5	+	139226678	139226885	139226705	139226885	139226577	139226604	1205	3611	44284744	2512	46545548	77	50	0.564394	1	0.042,0.122,0.014,0.015	0.027,0.057,0.012,0.026	0.018	chr5:139226604-139226679(+)	chr5:139226604-139226706(+)
ENSMUSG00000036817	Sun1	chr5	+	139238827	139238939	139238830	139238939	139237878	139237922	1206	25486044	18233922	33575040	26322628	53	50	0.666173	1	0.567,0.663,0.592,0.654	0.545,0.627,0.645,0.574	0.021	chr5:139237922-139238828(+)	chr5:139237922-139238831(+)
ENSMUSG00000028522	Mier1	chr4	+	103118238	103118315	103118241	103118315	103115559	103115660	1215	4863	220	2253	4211	53	50	0.00316565	0.0676423	1.0,0.791,0.739,1.0	0.321,0.485,0.825,0.739	0.29	chr4:103115660-103118239(+)	chr4:103115660-103118242(+)
ENSMUSG00000028522	Mier1	chr4	+	103118238	103118315	103118280	103118315	103115559	103115660	1216	417117	3414	310106	2211	92	50	0.276127	1	0.42,0.698,0.857,0.487	0.449,0.731,0.845,0.765	-0.082	chr4:103115660-103118239(+)	chr4:103115660-103118281(+)
ENSMUSG00000028522	Mier1	chr4	+	103118241	103118315	103118280	103118315	103115559	103115660	1217	1174	3414	51064	2211	89	50	0.0599017	0.472104	0.0,0.607,0.797,0.36	0.584,0.737,0.771,0.692	-0.255	chr4:103115660-103118242(+)	chr4:103115660-103118281(+)
ENSMUSG00000030759	Far1	chr7	+	113539272	113539466	113539276	113539466	113525987	113526038	1225	9890106106	147136	84969590	10121012	54	50	0.431325	1	0.866,0.923,0.883,0.942	0.886,0.881,0.898,0.874	0.019	chr7:113526038-113539273(+)	chr7:113526038-113539277(+)
ENSMUSG00000028556	Dock7	chr4	-	98953865	98953923	98953865	98953880	98955315	98955447	1230	1	0	0	100	93	50	1	1	NA,NA,NA,1.0	NA,0.0,NA,NA	1	chr4:98953923-98955316(-)	chr4:98953880-98955316(-)
ENSMUSG00000061950	Ppp4r1	chr17	+	65803159	65803295	65803210	65803295	65783623	65783668	1231	1651113	18323119	35241322	9311217	100	50	0.00111285	0.0333265	0.308,0.072,0.151,0.255	0.66,0.279,0.351,0.393	-0.224	chr17:65783668-65803160(+)	chr17:65783668-65803211(+)
ENSMUSG00000037366	Pafah2	chr4	+	134410778	134410972	134410903	134410972	134402969	134403104	1232	52910	221	35114	1113	100	50	0.494273	1	1.0,0.333,0.692,0.833	0.6,0.714,0.846,0.4	0.074	chr4:134403104-134410779(+)	chr4:134403104-134410904(+)
ENSMUSG00000021218	Gdi2	chr13	+	3554411	3554546	3554441	3554546	3550988	3551088	1233	103910261027979	14331215	1064959870809	12212216	80	50	0.809902	1	0.979,0.951,0.982,0.976	0.982,0.966,0.961,0.969	0.003	chr13:3551088-3554412(+)	chr13:3551088-3554442(+)
ENSMUSG00000031516	Dctn6	chr8	-	34104985	34105098	34104985	34105039	34106341	34106406	1234	8766	2943	561310	6545	100	50	0.908294	1	0.667,0.28,0.429,0.5	0.294,0.375,0.619,0.5	0.022	chr8:34105098-34106342(-)	chr8:34105039-34106342(-)
ENSMUSG00000004056	Akt2	chr7	+	27629295	27629427	27629334	27629427	27628836	27628990	1236	204192242204	2120	200227193216	1000	89	50	1	1	0.983,0.991,0.986,1.0	0.991,1.0,1.0,1.0	-0.008	chr7:27628990-27629296(+)	chr7:27628990-27629335(+)
ENSMUSG00000029238	Clock	chr5	-	76229357	76229563	76229357	76229560	76230164	76230359	1238	5175	1201	3232	2120	53	50	0.150268	0.79307	0.825,0.321,1.0,0.825	0.586,0.654,0.586,1.0	0.036	chr5:76229563-76230165(-)	chr5:76229560-76230165(-)
ENSMUSG00000030177	Ccdc77	chr6	-	120341972	120342077	120341972	120342069	120348387	120348530	1240	2243	16182417	6354	24252121	58	50	0.328575	1	0.097,0.087,0.126,0.132	0.177,0.094,0.17,0.141	-0.035	chr6:120342077-120348388(-)	chr6:120342069-120348388(-)
ENSMUSG00000030177	Ccdc77	chr6	-	120350206	120350444	120350206	120350390	120354000	120354054	1241	8966	22181520	31211825	10131212	100	50	6.47119e-09	1.59879e-06	0.154,0.2,0.167,0.13	0.608,0.447,0.429,0.51	-0.336	chr6:120350444-120354001(-)	chr6:120350390-120354001(-)
ENSMUSG00000031314	Taf1	chrX	+	101540759	101541001	101540822	101541001	101539067	101539187	1243	50183831	916817	24443533	178511	100	50	0.540862	1	0.735,0.36,0.704,0.477	0.414,0.733,0.778,0.6	-0.062	chrX:101539187-101540760(+)	chrX:101539187-101540823(+)
ENSMUSG00000038070	Cntln	chr4	+	85063177	85063355	85063180	85063355	85049603	85050136	1244	28311211	5632	18201216	5442	53	50	0.873482	1	0.841,0.83,0.791,0.838	0.773,0.825,0.739,0.883	0.02	chr4:85050136-85063178(+)	chr4:85050136-85063181(+)
ENSMUSG00000057098	Ebf1	chr11	+	44907903	44908037	44907906	44908037	44883813	44883955	1245	110	0	120	10	53	50	1	1	NA,1.0,1.0,NA	NA,1.0,0.654,NA	0.173	chr11:44883955-44907904(+)	chr11:44883955-44907907(+)
ENSMUSG00000002983	Relb	chr7	-	19611816	19611925	19611816	19611885	19612504	19612720	1246	0	6224	1000	1552	90	50	1	1	0.0,0.0,0.0,0.0	0.357,0.0,0.0,0.0	-0.089	chr7:19611925-19612505(-)	chr7:19611885-19612505(-)
ENSMUSG00000002983	Relb	chr7	-	19616345	19617403	19616345	19616437	19617761	19617919	1247	1000	1113	1001	1120	100	50	1	1	0.333,0.0,0.0,0.0	0.333,0.0,0.0,1.0	-0.25	chr7:19617403-19617762(-)	chr7:19616437-19617762(-)
ENSMUSG00000028484	Psip1	chr4	-	83461870	83462473	83461870	83462174	83463594	83463713	1248	42524957	1162	60644358	5144	100	50	0.464463	1	0.955,0.963,0.803,0.934	0.857,0.97,0.843,0.879	0.027	chr4:83462473-83463595(-)	chr4:83462174-83463595(-)
ENSMUSG00000028484	Psip1	chr4	-	83461870	83462553	83461870	83462174	83463594	83463713	1249	28402936	1162	47422936	5144	100	50	0.520408	1	0.933,0.952,0.707,0.9	0.825,0.955,0.784,0.818	0.027	chr4:83462553-83463595(-)	chr4:83462174-83463595(-)
ENSMUSG00000028484	Psip1	chr4	-	83461870	83462553	83461870	83462473	83463594	83463713	1250	18243220	17242627	19362914	22302225	100	50	0.922199	1	0.346,0.333,0.381,0.27	0.302,0.375,0.397,0.219	0.009	chr4:83462553-83463595(-)	chr4:83462473-83463595(-)
ENSMUSG00000071068	Treml2	chr17	+	48307879	48308273	48308056	48308273	48302611	48302932	1252	190178219167	1345766103	183137168169	96889389	100	50	0.273797	1	0.415,0.61,0.624,0.448	0.488,0.438,0.475,0.487	0.052	chr17:48302932-48307880(+)	chr17:48302932-48308057(+)
ENSMUSG00000063808	Gpatch1	chr7	-	35308178	35308339	35308178	35308331	35309300	35309386	1253	31193136	3	18312228	1210	58	50	0.22974	0.992527	1.0,1.0,1.0,0.912	0.939,0.93,0.95,1.0	0.023	chr7:35308339-35309301(-)	chr7:35308331-35309301(-)
ENSMUSG00000038502	Ptov1	chr7	-	44864611	44864669	44864611	44864666	44864761	44864835	1257	187185243202	10	223169191187	0	53	50	1	1	1.0,1.0,0.996,1.0	1.0,1.0,1.0,1.0	-0.001	chr7:44864669-44864762(-)	chr7:44864666-44864762(-)
ENSMUSG00000038502	Ptov1	chr7	-	44865471	44865627	44865471	44865623	44866809	44866917	1258	202183231236	120	211195233203	10	54	50	1	1	1.0,0.994,0.991,1.0	1.0,1.0,0.995,1.0	-0.003	chr7:44865627-44866810(-)	chr7:44865623-44866810(-)
ENSMUSG00000025747	Tyms	chr5	-	30061967	30062049	30061967	30062039	30063235	30063411	1259	37243637	297311385349	25322422	279329258236	60	50	0.638801	1	0.094,0.06,0.072,0.081	0.069,0.075,0.072,0.072	0.005	chr5:30062049-30063236(-)	chr5:30062039-30063236(-)
ENSMUSG00000025747	Tyms	chr5	-	30068465	30068640	30068465	30068538	30071633	30071707	1260	642651705686	1011	544572466516	2010	100	50	1	1	0.997,1.0,0.997,0.997	0.993,1.0,0.996,1.0	0	chr5:30068640-30071634(-)	chr5:30068538-30071634(-)
ENSMUSG00000008305	Tle1	chr4	-	72138491	72138688	72138491	72138685	72139688	72139833	1261	8121112	22	1411611	4313	53	50	0.00360118	0.0730024	1.0,1.0,0.838,0.85	0.768,0.776,0.85,0.776	0.13	chr4:72138688-72139689(-)	chr4:72138685-72139689(-)
ENSMUSG00000051675	Trim32	chr4	+	65613128	65616238	65613131	65616238	65604985	65605069	1262	18161820	8323	88514	8753	53	50	0.00947489	0.145172	0.68,0.834,0.895,0.863	0.485,0.519,0.485,0.815	0.242	chr4:65605069-65613129(+)	chr4:65605069-65613132(+)
ENSMUSG00000030881	Arfip2	chr7	-	105638208	105638344	105638208	105638327	105639008	105639105	1268	1120	79676448	220	66573840	67	50	1	1	0.009,0.011,0.023,0.0	0.0,0.026,0.038,0.0	-0.005	chr7:105638344-105639009(-)	chr7:105638327-105639009(-)
ENSMUSG00000030881	Arfip2	chr7	-	105639008	105639105	105639008	105639093	105639324	105639465	1269	59696333	4230	64525945	2310	62	50	0.32076	1	0.922,0.965,0.944,1.0	0.963,0.933,0.979,1.0	-0.011	chr7:105639105-105639325(-)	chr7:105639093-105639325(-)
ENSMUSG00000030881	Arfip2	chr7	-	105639008	105639189	105639008	105639093	105639324	105639465	1270	16898	4230	16171213	2310	100	50	0.0961136	0.616084	0.667,0.667,0.6,1.0	0.8,0.739,0.857,1.0	-0.115	chr7:105639189-105639325(-)	chr7:105639093-105639325(-)
ENSMUSG00000030881	Arfip2	chr7	-	105639008	105639189	105639008	105639105	105639324	105639465	1271	7534	50665729	81031	55455033	100	50	0.519046	1	0.065,0.036,0.026,0.065	0.068,0.1,0.029,0.015	-0.005	chr7:105639189-105639325(-)	chr7:105639105-105639325(-)
ENSMUSG00000045672	Col27a1	chr4	+	63328531	63328703	63328534	63328703	63327829	63327895	1275	200	0	0	10	53	50	1	1	NA,1.0,NA,NA	NA,NA,0.0,NA	1	chr4:63327895-63328532(+)	chr4:63327895-63328535(+)
ENSMUSG00000021000	Mia2	chr12	+	59170257	59170318	59170261	59170318	59168933	59169035	1277	174208197164	12111110	128220160156	111598	54	50	0.730171	1	0.931,0.946,0.943,0.938	0.915,0.931,0.943,0.948	0.005	chr12:59169035-59170258(+)	chr12:59169035-59170262(+)
ENSMUSG00000018995	Nars2	chr7	+	97031545	97031583	97031550	97031583	97031337	97031436	1278	24263629	20	22202134	110	55	50	1	1	1.0,1.0,0.942,1.0	1.0,0.948,0.95,1.0	0.011	chr7:97031436-97031546(+)	chr7:97031436-97031551(+)
ENSMUSG00000036955	Kif1bp	chr10	-	62563235	62563508	62563235	62563351	62566036	62566121	1281	10	48406436	0	46493049	100	50	1	1	0.0,0.0,0.008,0.0	0.0,0.0,0.0,0.0	0.002	chr10:62563508-62566037(-)	chr10:62563351-62566037(-)
ENSMUSG00000034560	Washc4	chr10	+	83550880	83550948	83550886	83550948	83550263	83550309	1282	21323433	2022	32372931	1002	56	50	1	1	0.904,1.0,0.938,0.936	0.966,1.0,1.0,0.933	-0.03	chr10:83550309-83550881(+)	chr10:83550309-83550887(+)
ENSMUSG00000034560	Washc4	chr10	+	83556000	83556116	83556012	83556116	83555572	83555615	1283	5731	24251425	2315	17113227	62	50	0.321293	1	0.144,0.184,0.147,0.031	0.087,0.18,0.025,0.13	0.021	chr10:83555615-83556001(+)	chr10:83555615-83556013(+)
ENSMUSG00000020659	Cbll1	chr12	-	31492078	31492179	31492078	31492176	31494581	31494749	1284	13383823	3045	18241619	4333	53	50	0.42868	1	0.803,1.0,0.9,0.813	0.809,0.883,0.834,0.857	0.033	chr12:31492179-31494582(-)	chr12:31492176-31494582(-)
ENSMUSG00000020659	Cbll1	chr12	-	31492078	31492179	31492078	31492176	31494590	31494749	1285	41099	5113	7654	1110	53	50	1	1	0.43,0.904,0.895,0.739	0.868,0.85,0.825,1.0	-0.144	chr12:31492179-31494591(-)	chr12:31492176-31494591(-)
ENSMUSG00000007987	Ift22	chr5	+	136911688	136911891	136911806	136911891	136911301	136911391	1287	10311610692	101	147149117121	110	100	50	1	1	1.0,0.983,1.0,0.979	1.0,0.987,0.983,1.0	-0.002	chr5:136911391-136911689(+)	chr5:136911391-136911807(+)
ENSMUSG00000020526	Znhit3	chr11	-	84913221	84913436	84913221	84913302	84914210	84914285	1289	3003	52496858	3251	49465854	100	50	0.217586	0.966168	0.028,0.0,0.0,0.025	0.03,0.021,0.041,0.009	-0.012	chr11:84913436-84914211(-)	chr11:84913302-84914211(-)
ENSMUSG00000020526	Znhit3	chr11	-	84914210	84914383	84914210	84914285	84916098	84916130	1290	10772	901039570	1352	53736777	100	50	0.0488591	0.428248	0.053,0.033,0.036,0.014	0.009,0.02,0.036,0.013	0.015	chr11:84914383-84916099(-)	chr11:84914285-84916099(-)
ENSMUSG00000060743	H3f3a	chr1	-	180812689	180812786	180812689	180812746	180813470	180813603	1294	91043	1010	31143	1012	90	50	0.54884	1	0.833,1.0,0.69,1.0	0.625,1.0,0.69,0.455	0.188	chr1:180812786-180813471(-)	chr1:180812746-180813471(-)
ENSMUSG00000071657	Bscl2	chr19	+	8847666	8847982	8847913	8847982	8847405	8847547	1301	166155161135	411	155129125149	3011	100	50	0.750963	1	1.0,0.951,0.988,0.985	0.963,1.0,0.984,0.987	-0.003	chr19:8847547-8847667(+)	chr19:8847547-8847914(+)
ENSMUSG00000029049	Morn1	chr4	+	155128678	155128800	155128682	155128800	155111416	155111589	1303	3245	1100	3313	0	54	50	1	1	0.735,0.649,1.0,1.0	1.0,1.0,1.0,1.0	-0.154	chr4:155111589-155128679(+)	chr4:155111589-155128683(+)
ENSMUSG00000021906	Oxnad1	chr14	+	32099388	32099631	32099533	32099631	32096486	32096628	1305	80779586	54132	70867372	3484	100	50	0.778806	1	0.889,0.906,0.785,0.956	0.921,0.915,0.82,0.9	-0.005	chr14:32096628-32099389(+)	chr14:32096628-32099534(+)
ENSMUSG00000021906	Oxnad1	chr14	+	32100954	32101094	32100985	32101094	32099533	32099631	1306	4123	42505553	3842	49474143	81	50	0.0802589	0.556064	0.056,0.012,0.022,0.034	0.036,0.095,0.057,0.028	-0.023	chr14:32099631-32100955(+)	chr14:32099631-32100986(+)
ENSMUSG00000006345	Ggt1	chr10	+	75574228	75574396	75574231	75574396	75573610	75573748	1313	2	0	1120	100	53	50	1	1	NA,NA,NA,1.0	1.0,0.485,1.0,NA	0.172	chr10:75573748-75574229(+)	chr10:75573748-75574232(+)
ENSMUSG00000056234	Ncoa4	chr14	+	32174389	32174533	32174392	32174533	32173400	32173490	1317	174140168137	23271016	171181135167	21241325	53	50	0.883171	1	0.877,0.83,0.941,0.89	0.885,0.877,0.907,0.863	0.001	chr14:32173490-32174390(+)	chr14:32173490-32174393(+)
ENSMUSG00000028345	Tex10	chr4	-	48459863	48460102	48459863	48459999	48462768	48462881	1318	16190113134	3013	10611912198	10	100	50	0.586639	1	0.964,1.0,0.983,0.957	1.0,1.0,0.984,1.0	-0.02	chr4:48460102-48462769(-)	chr4:48459999-48462769(-)
ENSMUSG00000026219	Trip12	chr1	-	84745012	84745185	84745012	84745170	84747177	84747329	1319	76779890	4687	78869596	5467	65	50	0.570779	1	0.936,0.908,0.904,0.908	0.923,0.943,0.924,0.913	-0.012	chr1:84745185-84747178(-)	chr1:84745170-84747178(-)
ENSMUSG00000026219	Trip12	chr1	-	84758973	84759127	84758973	84759046	84760762	84760919	1320	159101122110	3635	10614110995	3364	100	50	0.995428	1	0.964,0.894,0.953,0.917	0.946,0.959,0.901,0.922	0	chr1:84759127-84760763(-)	chr1:84759046-84760763(-)
ENSMUSG00000026219	Trip12	chr1	-	84777423	84777507	84777423	84777489	84782826	84782963	1321	1119912698	10472	11611011496	3479	68	50	0.856424	1	0.891,0.948,0.93,0.973	0.966,0.953,0.923,0.887	0.003	chr1:84777507-84782827(-)	chr1:84777489-84782827(-)
ENSMUSG00000035601	Trmt10b	chr4	+	45301201	45301344	45301235	45301344	45300433	45300627	1322	3454	28384641	401	29213719	84	50	0.0110868	0.155559	0.06,0.059,0.061,0.055	0.0,0.102,0.0,0.03	0.026	chr4:45300627-45301202(+)	chr4:45300627-45301236(+)
ENSMUSG00000022351	Sqle	chr15	+	59322835	59322932	59322866	59322932	59321313	59321494	1323	44437838	100	59665564	100	81	50	1	1	1.0,0.964,1.0,1.0	1.0,0.976,1.0,1.0	-0.003	chr15:59321494-59322836(+)	chr15:59321494-59322867(+)
ENSMUSG00000021286	Zfyve21	chr12	+	111825575	111825632	111825578	111825632	111825016	111825108	1325	1	1110	0	1110	53	50	1	1	0.0,0.0,0.0,1.0	0.0,0.0,0.0,NA	0.25	chr12:111825108-111825576(+)	chr12:111825108-111825579(+)
ENSMUSG00000028479	Gne	chr4	-	44041662	44041889	44041662	44041884	44042162	44042292	1326	6363	69609559	6387	55716967	55	50	0.234982	1	0.073,0.043,0.054,0.044	0.09,0.037,0.095,0.087	-0.024	chr4:44041889-44042163(-)	chr4:44041884-44042163(-)
ENSMUSG00000024184	Pdia2	chr17	-	26197616	26197754	26197616	26197745	26197831	26197965	1329	1967	110	11259	100	59	50	1	1	1.0,0.884,0.836,1.0	1.0,0.91,1.0,1.0	-0.048	chr17:26197754-26197832(-)	chr17:26197745-26197832(-)
ENSMUSG00000028470	Hint2	chr4	-	43654226	43654422	43654226	43654411	43654512	43654585	1331	3325	8813512689	4725	941128096	61	50	0.193152	0.912224	0.027,0.018,0.013,0.044	0.034,0.049,0.02,0.041	-0.011	chr4:43654422-43654513(-)	chr4:43654411-43654513(-)
ENSMUSG00000028470	Hint2	chr4	-	43654512	43654614	43654512	43654585	43654715	43654820	1332	5661	121153138109	5252	1291448595	79	50	0.678236	1	0.025,0.024,0.027,0.006	0.024,0.009,0.036,0.013	0	chr4:43654614-43654716(-)	chr4:43654585-43654716(-)
ENSMUSG00000028470	Hint2	chr4	-	43654715	43654820	43654715	43654790	43654905	43655046	1333	205226243149	102	160216161156	1	80	50	1	1	1.0,0.993,1.0,0.979	1.0,1.0,1.0,0.99	-0.005	chr4:43654820-43654906(-)	chr4:43654790-43654906(-)
ENSMUSG00000051517	Arhgef39	chr4	-	43496141	43496720	43496141	43496717	43496820	43496909	1334	9590104110	100	80767582	20	53	50	1	1	1.0,0.988,1.0,1.0	1.0,1.0,0.973,1.0	0.004	chr4:43496720-43496821(-)	chr4:43496717-43496821(-)
ENSMUSG00000051517	Arhgef39	chr4	-	43497086	43497710	43497086	43497316	43497958	43498029	1335	80857674	1110	71626762	1011	100	50	1	1	0.976,0.977,0.974,1.0	0.973,1.0,0.971,0.969	0.003	chr4:43497710-43497959(-)	chr4:43497316-43497959(-)
ENSMUSG00000028459	Cd72	chr4	-	43449451	43449549	43449451	43449528	43450069	43450221	1337	16161613	1711817	11787	64176	71	50	0.780544	1	0.399,0.506,0.585,0.35	0.564,0.552,0.249,0.451	0.006	chr4:43449549-43450070(-)	chr4:43449528-43450070(-)
ENSMUSG00000028456	Unc13b	chr4	+	43249456	43249581	43249459	43249581	43245467	43245596	1341	4200	0	1001	100	53	50	1	1	1.0,1.0,NA,NA	1.0,0.0,NA,1.0	0.333	chr4:43245596-43249457(+)	chr4:43245596-43249460(+)
ENSMUSG00000028454	Pigo	chr4	-	43019646	43019853	43019646	43019781	43020266	43021794	1342	80536864	101	61525744	11	100	50	1	1	1.0,0.964,1.0,0.97	1.0,1.0,0.966,0.957	0.003	chr4:43019853-43020267(-)	chr4:43019781-43020267(-)
ENSMUSG00000033916	Chmp2a	chr7	-	13032434	13032821	13032434	13032565	13033828	13034042	1343	292319321306	7535	295334275290	2334	100	50	0.134197	0.736861	0.954,0.97,0.982,0.968	0.987,0.982,0.979,0.973	-0.012	chr7:13032821-13033829(-)	chr7:13032565-13033829(-)
ENSMUSG00000040410	Fbxl4	chr4	+	22390676	22390921	22390713	22390921	22385906	22386252	1344	19142013	5850	17171315	2121	87	50	0.0205626	0.243365	0.686,0.501,0.697,1.0	0.83,0.907,0.789,0.896	-0.135	chr4:22386252-22390677(+)	chr4:22386252-22390714(+)
ENSMUSG00000028439	Fam219a	chr4	-	41517690	41520398	41517690	41520395	41520911	41520966	1348	4593	140	9429	1	53	50	0.17273	0.857792	1.0,0.825,0.68,1.0	1.0,1.0,1.0,0.895	-0.098	chr4:41520398-41520912(-)	chr4:41520395-41520912(-)
ENSMUSG00000051735	Rinl	chr7	+	28790289	28790411	28790325	28790411	28788968	28789005	1350	2014210	24151111	13101113	1212129	86	50	0.257806	1	0.326,0.352,0.096,0.346	0.386,0.326,0.348,0.456	-0.099	chr7:28789005-28790290(+)	chr7:28789005-28790326(+)
ENSMUSG00000028411	Aptx	chr4	-	40695376	40695423	40695376	40695418	40697216	40697353	1352	38563840	14121513	34422640	77816	55	50	0.473505	1	0.712,0.809,0.697,0.737	0.815,0.845,0.747,0.694	-0.036	chr4:40695423-40697217(-)	chr4:40695418-40697217(-)
ENSMUSG00000040296	Ddx58	chr4	-	40227965	40228200	40227965	40228113	40229494	40229676	1353	1122	20191413	1020	13162313	100	50	1	1	0.024,0.026,0.067,0.071	0.037,0.0,0.042,0.0	0.027	chr4:40228200-40229495(-)	chr4:40228113-40229495(-)
ENSMUSG00000028292	Rars2	chr4	+	34630472	34630570	34630476	34630570	34625400	34625484	1355	77779082	1100	79878570	101	54	50	1	1	0.986,0.986,1.0,1.0	1.0,0.988,1.0,0.985	0	chr4:34625484-34630473(+)	chr4:34625484-34630477(+)
ENSMUSG00000022386	Trmu	chr15	+	85892566	85892739	85892621	85892739	85890204	85890327	1357	51456144	3002	36314140	2011	100	50	0.547536	1	0.895,1.0,1.0,0.917	0.9,1.0,0.953,0.952	0.002	chr15:85890327-85892567(+)	chr15:85890327-85892622(+)
ENSMUSG00000058006	Mdn1	chr4	+	32751211	32751393	32751226	32751393	32750912	32751068	1358	37326450	10	25324039	0	65	50	1	1	1.0,1.0,0.98,1.0	1.0,1.0,1.0,1.0	-0.005	chr4:32751068-32751212(+)	chr4:32751068-32751227(+)
ENSMUSG00000040865	Ino80d	chr1	-	63093284	63093531	63093284	63093440	63093639	63093730	1362	2116159	3435	1820912	5453	100	50	0.706323	1	0.778,0.667,0.714,0.474	0.643,0.714,0.474,0.667	0.034	chr1:63093531-63093640(-)	chr1:63093440-63093640(-)
ENSMUSG00000006010	Odr4	chr1	-	150388522	150388657	150388522	150388619	150390235	150390356	1363	8710510292	5573	66796676	10263	88	50	0.380595	1	0.908,0.923,0.892,0.946	0.789,0.957,0.862,0.935	0.031	chr1:150388657-150390236(-)	chr1:150388619-150390236(-)
ENSMUSG00000028289	Epha7	chr4	+	28947527	28947653	28947539	28947653	28943322	28943378	1364	6256	0	4634	12	62	50	1	1	1.0,1.0,1.0,1.0	1.0,1.0,0.708,0.617	0.169	chr4:28943378-28947528(+)	chr4:28943378-28947540(+)
ENSMUSG00000034349	Smc4	chr3	+	69027492	69027718	69027562	69027718	69025823	69025985	1374	484439490494	51045	472533492405	5382	100	50	0.324714	1	0.98,0.956,0.984,0.98	0.979,0.989,0.969,0.99	-0.007	chr3:69025985-69027493(+)	chr3:69025985-69027563(+)
ENSMUSG00000033191	Tie1	chr4	-	118474299	118474413	118474299	118474402	118475423	118475614	1375	49746041	3001	46352324	200	61	50	1	1	0.93,1.0,1.0,0.971	1.0,0.935,1.0,1.0	-0.008	chr4:118474413-118475424(-)	chr4:118474402-118475424(-)
ENSMUSG00000038147	Cd84	chr1	+	171884584	171884679	171884587	171884679	171873304	171873439	1379	47586938	710169	49473429	612913	53	50	0.394325	1	0.864,0.845,0.803,0.799	0.885,0.787,0.781,0.678	0.045	chr1:171873439-171884585(+)	chr1:171873439-171884588(+)
ENSMUSG00000001674	Ddx18	chr1	-	121559165	121559327	121559165	121559270	121560131	121560271	1382	267251293262	10	217229216224	0	100	50	1	1	1.0,1.0,0.993,1.0	1.0,1.0,1.0,1.0	-0.002	chr1:121559327-121560132(-)	chr1:121559270-121560132(-)
ENSMUSG00000035521	Gnptg	chr17	-	25235344	25235480	25235344	25235459	25235533	25235627	1383	2013	55494333	1323	54504860	71	50	0.420574	1	0.025,0.0,0.016,0.06	0.013,0.041,0.029,0.034	-0.004	chr17:25235480-25235534(-)	chr17:25235459-25235534(-)
ENSMUSG00000031543	Ank1	chr8	+	23098920	23099019	23098924	23099019	23097845	23098043	1384	22294217	20	13472933	0	54	50	1	1	1.0,1.0,0.951,1.0	1.0,1.0,1.0,1.0	-0.012	chr8:23098043-23098921(+)	chr8:23098043-23098925(+)
ENSMUSG00000029101	Rgs12	chr5	+	35025848	35026043	35025918	35026043	35024276	35024353	1388	86649279	1000	611369191	10	100	50	1	1	0.977,1.0,1.0,1.0	1.0,1.0,0.978,1.0	0	chr5:35024353-35025849(+)	chr5:35024353-35025919(+)
ENSMUSG00000027346	Gpcpd1	chr2	-	132572184	132572257	132572184	132572254	132578067	132578248	1389	1630	108312	1521	10877	53	50	0.867639	1	0.086,0.414,0.485,0.0	0.086,0.371,0.212,0.119	0.049	chr2:132572257-132578068(-)	chr2:132572254-132578068(-)
ENSMUSG00000050382	Kif7	chr7	-	79702105	79702282	79702105	79702279	79702452	79702578	1390	2394	200	2112	0	53	50	1	1	1.0,0.586,1.0,1.0	1.0,1.0,1.0,1.0	-0.104	chr7:79702282-79702453(-)	chr7:79702279-79702453(-)
ENSMUSG00000007837	Prrg2	chr7	-	45060204	45060386	45060204	45060359	45060740	45060892	1391	20141319	1	18181715	1110	77	50	1	1	1.0,1.0,1.0,0.925	0.921,0.921,0.917,1.0	0.041	chr7:45060386-45060741(-)	chr7:45060359-45060741(-)
ENSMUSG00000007837	Prrg2	chr7	-	45060204	45060415	45060204	45060359	45060740	45060892	1392	19141519	1	1681011	1110	100	50	1	1	1.0,1.0,1.0,0.905	0.889,0.8,0.833,1.0	0.096	chr7:45060415-45060741(-)	chr7:45060359-45060741(-)
ENSMUSG00000007837	Prrg2	chr7	-	45060204	45060415	45060204	45060386	45060740	45060892	1393	991110	98910	11346	12131110	79	50	0.0281177	0.297987	0.388,0.416,0.436,0.388	0.367,0.127,0.187,0.275	0.168	chr7:45060415-45060741(-)	chr7:45060386-45060741(-)
ENSMUSG00000052752	Traf7	chr17	-	24514712	24514866	24514712	24514829	24516504	24516596	1395	41343330	143146149109	23232223	144122124137	87	50	0.0174486	0.221179	0.141,0.118,0.113,0.137	0.084,0.098,0.093,0.088	0.037	chr17:24514866-24516505(-)	chr17:24514829-24516505(-)
ENSMUSG00000052752	Traf7	chr17	-	24516504	24516599	24516504	24516596	24518741	24518794	1396	12214211295	167154128105	124898681	118127116119	53	50	0.521859	1	0.408,0.465,0.452,0.46	0.498,0.398,0.412,0.391	0.021	chr17:24516599-24518742(-)	chr17:24516596-24518742(-)
ENSMUSG00000052752	Traf7	chr17	-	24518741	24518799	24518741	24518794	24519130	24519246	1399	180166155129	910912	149155125130	11889	55	50	0.985267	1	0.948,0.938,0.94,0.907	0.925,0.946,0.934,0.929	0	chr17:24518799-24519131(-)	chr17:24518794-24519131(-)
ENSMUSG00000027014	Cwc22	chr2	-	77932698	77932766	77932698	77932763	77936592	77936722	1400	24182024	47325132	20232221	32553436	53	50	0.900152	1	0.325,0.347,0.27,0.414	0.371,0.283,0.379,0.355	-0.008	chr2:77932766-77936593(-)	chr2:77932763-77936593(-)
ENSMUSG00000027263	Tubgcp4	chr2	+	121189823	121189965	121189826	121189965	121189361	121189469	1403	31323821	35163724	24302924	22291823	53	50	0.815729	1	0.455,0.654,0.492,0.452	0.507,0.494,0.603,0.496	-0.012	chr2:121189469-121189824(+)	chr2:121189469-121189827(+)
ENSMUSG00000037470	Uggt1	chr1	-	36174078	36174210	36174078	36174130	36174895	36175102	1404	390224288312	1812105	378360318345	7493	100	50	0.00115006	0.034054	0.915,0.903,0.935,0.969	0.964,0.978,0.946,0.983	-0.037	chr1:36174210-36174896(-)	chr1:36174130-36174896(-)
ENSMUSG00000033852	Gm28042	chr2	+	120031501	120031651	120031574	120031651	120031306	120031402	1408	8646	17403129	49814	11231217	100	50	0.00246024	0.0578888	0.19,0.07,0.061,0.094	0.154,0.164,0.25,0.292	-0.111	chr2:120031402-120031502(+)	chr2:120031402-120031575(+)
ENSMUSG00000033852	Gm28042	chr2	+	120034477	120034670	120034573	120034670	120032113	120032465	1409	1241	0	1215	1	100	50	1	1	1.0,1.0,1.0,1.0	1.0,1.0,1.0,0.714	0.072	chr2:120032465-120034478(+)	chr2:120032465-120034574(+)
ENSMUSG00000084786	Ubl5	chr9	+	20645601	20645659	20645621	20645659	20645405	20645489	1410	59636760	772751818671	51674333	739779682593	70	50	0.133999	0.736861	0.052,0.057,0.055,0.06	0.047,0.058,0.043,0.038	0.009	chr9:20645489-20645602(+)	chr9:20645489-20645622(+)
ENSMUSG00000011658	Fuz	chr7	+	44898502	44898700	44898515	44898700	44897519	44897624	1411	45403624	5020	49362827	2000	63	50	0.15326	0.798203	0.877,1.0,0.935,1.0	0.951,1.0,1.0,1.0	-0.035	chr7:44897624-44898503(+)	chr7:44897624-44898516(+)
ENSMUSG00000025010	Ccnj	chr19	+	40845044	40845204	40845080	40845204	40844659	40844959	1413	17142318	1000	13151610	1200	86	50	1	1	0.908,1.0,1.0,1.0	0.883,0.813,1.0,1.0	0.053	chr19:40844959-40845045(+)	chr19:40844959-40845081(+)
ENSMUSG00000026648	Dclre1c	chr2	+	3436988	3437090	3437001	3437090	3436437	3436493	1414	9487	0	91278	100	63	50	1	1	1.0,1.0,1.0,1.0	1.0,0.905,1.0,1.0	0.024	chr2:3436493-3436989(+)	chr2:3436493-3437002(+)
ENSMUSG00000026648	Dclre1c	chr2	+	3436988	3437090	3437029	3437090	3436437	3436493	1415	1471511	2022	15151516	20	91	50	0.0213225	0.250112	0.794,1.0,0.805,0.751	1.0,1.0,0.805,1.0	-0.114	chr2:3436493-3436989(+)	chr2:3436493-3437030(+)
ENSMUSG00000026648	Dclre1c	chr2	+	3437001	3437090	3437029	3437090	3436437	3436493	1416	5374	2022	6488	20	78	50	0.00529883	0.0969734	0.616,1.0,0.692,0.562	1.0,1.0,0.719,1.0	-0.212	chr2:3436493-3437002(+)	chr2:3436493-3437030(+)
ENSMUSG00000034278	Dnajc17	chr2	-	119180486	119180680	119180486	119180564	119180925	119180969	1417	41164	51695145	3717	40504642	100	50	0.618207	1	0.038,0.074,0.056,0.043	0.036,0.065,0.011,0.077	0.005	chr2:119180680-119180926(-)	chr2:119180564-119180926(-)
ENSMUSG00000005699	Pard6a	chr8	+	105702607	105703493	105702610	105703493	105702173	105702396	1421	15474	61665	51367	9485	53	50	0.579702	1	0.702,0.191,0.524,0.43	0.344,0.754,0.414,0.569	-0.058	chr8:105702396-105702608(+)	chr8:105702396-105702611(+)
ENSMUSG00000038520	Tbc1d17	chr7	-	44845256	44845368	44845256	44845328	44845874	44846082	1423	120125167128	51036	11692116122	4556	90	50	0.888532	1	0.93,0.874,0.969,0.922	0.942,0.911,0.928,0.919	-0.001	chr7:44845368-44845875(-)	chr7:44845328-44845875(-)
ENSMUSG00000039130	Zc3hc1	chr6	-	30375938	30376066	30375938	30376062	30381780	30381864	1426	1001207685	11	80897476	100	54	50	1	1	1.0,1.0,0.986,0.987	1.0,0.988,1.0,1.0	-0.004	chr6:30376066-30381781(-)	chr6:30376062-30381781(-)
ENSMUSG00000039623	Ap5z1	chr5	+	142466475	142466676	142466489	142466676	142466257	142466392	1427	2213	37382036	2303	26222729	64	50	0.813957	1	0.041,0.039,0.038,0.061	0.057,0.096,0.0,0.075	-0.012	chr5:142466392-142466476(+)	chr5:142466392-142466490(+)
ENSMUSG00000039623	Ap5z1	chr5	+	142470382	142470556	142470393	142470556	142470289	142470327	1428	3221	20241928	1020	31171924	61	50	1	1	0.109,0.064,0.079,0.028	0.026,0.0,0.079,0.0	0.044	chr5:142470327-142470383(+)	chr5:142470327-142470394(+)
ENSMUSG00000039623	Ap5z1	chr5	+	142474373	142474514	142474421	142474514	142473907	142474050	1429	56464264	2231	37464251	321	98	50	0.550849	1	0.935,0.921,0.877,0.97	1.0,0.887,0.915,0.963	-0.015	chr5:142474050-142474374(+)	chr5:142474050-142474422(+)
ENSMUSG00000004040	Stat3	chr11	-	100889477	100889590	100889477	100889540	100889885	100889928	1431	218215236195	10986	208170188146	11131317	100	50	0.0025267	0.0582816	0.916,0.923,0.937,0.942	0.904,0.867,0.879,0.811	0.064	chr11:100889590-100889886(-)	chr11:100889540-100889886(-)
ENSMUSG00000021288	Klc1	chr12	+	111789324	111789486	111789348	111789486	111787487	111787596	1433	64316359	26272726	62757367	25172922	74	50	0.0681046	0.511223	0.625,0.437,0.612,0.605	0.626,0.749,0.63,0.673	-0.1	chr12:111787596-111789325(+)	chr12:111787596-111789349(+)
ENSMUSG00000054405	Dnajc8	chr4	+	132541720	132541838	132541781	132541838	132538186	132538288	1437	2851	197232203226	6942	252310240222	100	50	1	1	0.005,0.017,0.012,0.002	0.012,0.014,0.008,0.004	-0.001	chr4:132538288-132541721(+)	chr4:132538288-132541782(+)
ENSMUSG00000054405	Dnajc8	chr4	+	132544009	132544122	132544055	132544122	132541781	132541838	1438	26201821	225235266266	23222225	328315260273	96	50	0.628816	1	0.057,0.042,0.034,0.039	0.035,0.035,0.042,0.046	0.003	chr4:132541838-132544010(+)	chr4:132541838-132544056(+)
ENSMUSG00000039536	Stau1	chr2	-	166953207	166953351	166953207	166953345	166954899	166955112	1440	125110116101	1020	9511010489	1100	56	50	1	1	0.991,1.0,0.981,1.0	0.988,0.99,1.0,1.0	-0.001	chr2:166953351-166954900(-)	chr2:166953345-166954900(-)
ENSMUSG00000039536	Stau1	chr2	-	166954899	166955130	166954899	166955112	166960022	166960121	1441	34355224	28443436	52433445	24463347	68	50	0.525833	1	0.472,0.369,0.529,0.329	0.614,0.407,0.431,0.413	-0.041	chr2:166955130-166960023(-)	chr2:166955112-166960023(-)
ENSMUSG00000038085	Cnbd2	chr2	+	156335249	156335413	156335285	156335413	156333578	156333632	1442	611512	0	131147	100	86	50	1	1	1.0,1.0,1.0,1.0	1.0,0.368,1.0,1.0	0.158	chr2:156333632-156335250(+)	chr2:156333632-156335286(+)
ENSMUSG00000021733	Slc4a7	chr14	+	14757284	14757431	14757378	14757431	14750434	14750522	1444	31282932	1001	25401930	0	100	50	1	1	0.939,1.0,1.0,0.941	1.0,1.0,1.0,1.0	-0.03	chr14:14750522-14757285(+)	chr14:14750522-14757379(+)
ENSMUSG00000021733	Slc4a7	chr14	+	14791051	14791164	14791066	14791164	14786291	14786423	1445	211	18191312	3110	12121518	65	50	0.33256	1	0.0,0.075,0.056,0.06	0.161,0.06,0.049,0.0	-0.02	chr14:14786423-14791052(+)	chr14:14786423-14791067(+)
ENSMUSG00000039176	Polg	chr7	-	79456040	79456188	79456040	79456148	79456434	79456512	1446	10586	68746985	7566	75728174	90	50	0.450728	1	0.076,0.036,0.061,0.038	0.049,0.037,0.04,0.043	0.011	chr7:79456188-79456435(-)	chr7:79456148-79456435(-)
ENSMUSG00000020952	Scfd1	chr12	+	51387049	51387138	51387066	51387138	51384104	51384175	1452	10510611790	1210	98949079	2001	67	50	1	1	0.987,0.975,0.989,1.0	0.973,1.0,1.0,0.983	-0.001	chr12:51384175-51387050(+)	chr12:51384175-51387067(+)
ENSMUSG00000020952	Scfd1	chr12	+	51444794	51445017	51444983	51445017	51442530	51442583	1453	10582	1148310798	3984	85936673	100	50	0.589485	1	0.042,0.029,0.036,0.01	0.017,0.046,0.057,0.027	-0.007	chr12:51442583-51444795(+)	chr12:51442583-51444984(+)
ENSMUSG00000034343	Ube2f	chr1	+	91254214	91254393	91254259	91254393	91253759	91253827	1455	1471517	2974	15131512	813126	95	50	0.194324	0.913394	0.787,0.29,0.53,0.691	0.497,0.345,0.397,0.513	0.137	chr1:91253827-91254215(+)	chr1:91253827-91254260(+)
ENSMUSG00000019856	Fam184a	chr10	-	53635231	53635897	53635231	53635434	53638176	53638281	1458	2	0	101	1	100	50	1	1	NA,NA,NA,1.0	NA,1.0,NA,0.333	0.334	chr10:53635897-53638177(-)	chr10:53635434-53638177(-)
ENSMUSG00000018008	Cyth4	chr15	+	78604859	78605913	78605846	78605913	78604635	78604700	1459	1817168	13414510189	18251021	12212411993	100	50	0.199094	0.923733	0.063,0.055,0.073,0.043	0.069,0.092,0.04,0.101	-0.017	chr15:78604700-78604860(+)	chr15:78604700-78605847(+)
ENSMUSG00000018008	Cyth4	chr15	+	78611421	78611597	78611448	78611597	78609761	78609874	1460	7553	1151058896	119104	1238811584	77	50	0.0574393	0.460563	0.038,0.03,0.036,0.02	0.055,0.062,0.053,0.03	-0.019	chr15:78609874-78611422(+)	chr15:78609874-78611449(+)
ENSMUSG00000025591	Tma16	chr8	-	66482505	66482599	66482505	66482543	66484057	66484170	1461	47292327	125119107118	27511635	1431178180	100	50	0.439555	1	0.158,0.109,0.097,0.103	0.086,0.179,0.09,0.179	-0.017	chr8:66482599-66484058(-)	chr8:66482543-66484058(-)
ENSMUSG00000041740	Rnf10	chr5	-	115241769	115242061	115241769	115242058	115242392	115242551	1462	201172213171	20302121	174172170210	26191516	53	50	0.382388	1	0.905,0.844,0.905,0.885	0.863,0.895,0.914,0.925	-0.015	chr5:115242061-115242393(-)	chr5:115242058-115242393(-)
ENSMUSG00000041740	Rnf10	chr5	-	115248914	115249173	115248914	115249170	115249396	115249522	1463	34253333	350338364325	41272827	338329309279	53	50	0.629071	1	0.084,0.065,0.079,0.087	0.103,0.072,0.079,0.084	-0.006	chr5:115249173-115249397(-)	chr5:115249170-115249397(-)
ENSMUSG00000031351	Zfp185	chrX	+	73001404	73001446	73001407	73001446	73000987	73001071	1466	201	0	0	1	53	50	1	1	NA,1.0,NA,1.0	NA,NA,NA,0.0	1	chrX:73001071-73001405(+)	chrX:73001071-73001408(+)
ENSMUSG00000017405	Nek8	chr11	-	78172450	78172683	78172450	78172603	78172924	78173130	1468	2016116	202	2015611	0	100	50	0.616769	1	1.0,0.8,1.0,0.6	1.0,1.0,1.0,1.0	-0.15	chr11:78172683-78172925(-)	chr11:78172603-78172925(-)
ENSMUSG00000018474	Chd3	chr11	-	69361048	69361242	69361048	69361224	69361384	69361535	1472	15111314	47566547	177109	27323023	68	50	0.11964	0.684421	0.19,0.126,0.128,0.18	0.316,0.139,0.197,0.223	-0.063	chr11:69361242-69361385(-)	chr11:69361224-69361385(-)
ENSMUSG00000018474	Chd3	chr11	-	69361384	69361535	69361384	69361523	69361670	69361721	1473	50586438	1212	40503830	100	62	50	0.907117	1	0.976,0.959,0.981,0.939	1.0,0.976,1.0,1.0	-0.03	chr11:69361535-69361671(-)	chr11:69361523-69361671(-)
ENSMUSG00000060206	Zfp462	chr4	+	55016813	55017100	55016996	55017100	55014682	55014847	1475	2	112	1000	1010	100	50	1	1	NA,0.0,0.0,0.333	0.333,NA,0.0,NA	-0.056	chr4:55014847-55016814(+)	chr4:55014847-55016997(+)
ENSMUSG00000060206	Zfp462	chr4	+	55016816	55017100	55016996	55017100	55014682	55014847	1476	2	112	1000	1010	100	50	1	1	NA,0.0,0.0,0.333	0.333,NA,0.0,NA	-0.056	chr4:55014847-55016817(+)	chr4:55014847-55016997(+)
ENSMUSG00000002102	Psmc3	chr2	+	91056641	91056801	91056657	91056801	91055904	91056042	1484	6799	456447509453	14857	433385380422	66	50	0.393369	1	0.01,0.012,0.013,0.015	0.024,0.015,0.01,0.012	-0.003	chr2:91056042-91056642(+)	chr2:91056042-91056658(+)
ENSMUSG00000020692	Nle1	chr11	-	82902994	82903197	82902994	82903133	82904089	82904136	1485	160180204168	16111710	126148129124	2654	100	50	0.000564944	0.0195897	0.833,0.891,0.857,0.894	0.969,0.925,0.928,0.939	-0.072	chr11:82903197-82904090(-)	chr11:82903133-82904090(-)
ENSMUSG00000001855	Nup214	chr2	+	32039319	32039476	32039322	32039476	32038101	32038172	1487	68527152	12141613	49535250	1317811	53	50	0.850394	1	0.842,0.778,0.807,0.791	0.781,0.746,0.86,0.811	0.005	chr2:32038172-32039320(+)	chr2:32038172-32039323(+)
ENSMUSG00000024845	Tmem134	chr19	+	4127549	4127639	4127576	4127639	4127056	4127121	1489	148182190134	5414	150173161159	1300	77	50	0.0232476	0.263318	0.951,0.967,0.992,0.956	0.99,0.974,1.0,1.0	-0.024	chr19:4127121-4127550(+)	chr19:4127121-4127577(+)
ENSMUSG00000024845	Tmem134	chr19	+	4130856	4131075	4131030	4131075	4127759	4127836	1491	2843	68747765	4332	69706951	100	50	0.421196	1	0.014,0.051,0.025,0.023	0.028,0.021,0.021,0.019	0.006	chr19:4127836-4130857(+)	chr19:4127836-4131031(+)
ENSMUSG00000024845	Tmem134	chr19	+	4131361	4131727	4131396	4131727	4131228	4131282	1492	306310288272	0	286272270288	11	85	50	1	1	1.0,1.0,1.0,1.0	1.0,1.0,0.994,0.994	0.003	chr19:4131282-4131362(+)	chr19:4131282-4131397(+)
ENSMUSG00000028582	Cc2d1b	chr4	+	108625333	108625533	108625407	108625533	108624845	108625004	1494	5473	82758073	3657	80807377	100	50	0.737997	1	0.03,0.026,0.042,0.02	0.018,0.036,0.033,0.043	-0.003	chr4:108625004-108625334(+)	chr4:108625004-108625408(+)
ENSMUSG00000028582	Cc2d1b	chr4	+	108625980	108626153	108626037	108626153	108625654	108625814	1495	177187201201	6141110	169157182200	6555	100	50	0.0199942	0.240698	0.937,0.87,0.901,0.91	0.934,0.94,0.948,0.952	-0.039	chr4:108625814-108625981(+)	chr4:108625814-108626038(+)
ENSMUSG00000026925	Inpp5e	chr2	-	26401600	26401785	26401600	26401698	26402099	26402223	1498	2121	26142634	6323	34282031	100	50	0.043474	0.396889	0.037,0.034,0.037,0.014	0.081,0.051,0.048,0.046	-0.026	chr2:26401785-26402100(-)	chr2:26401698-26402100(-)
ENSMUSG00000068205	Macrod2	chr2	+	140419904	140420495	140419950	140420495	140418816	140418914	1501	33144035	1	26421823	0	96	50	1	1	1.0,1.0,1.0,0.948	1.0,1.0,1.0,1.0	-0.013	chr2:140418914-140419905(+)	chr2:140418914-140419951(+)
ENSMUSG00000028382	Ptbp3	chr4	-	59485606	59485746	59485606	59485731	59488110	59488188	1503	461461508464	101033	468459425398	713109	65	50	0.054374	0.450609	0.973,0.973,0.992,0.992	0.981,0.964,0.97,0.971	0.011	chr4:59485746-59488111(-)	chr4:59485731-59488111(-)
ENSMUSG00000022255	Mtdh	chr15	+	34114023	34118110	34117879	34118110	34099483	34099585	1504	261246312275	6441	255262226202	4831	100	50	0.621976	1	0.956,0.969,0.975,0.993	0.97,0.942,0.974,0.99	0.004	chr15:34099585-34114024(+)	chr15:34099585-34117880(+)
ENSMUSG00000022255	Mtdh	chr15	+	34136673	34136827	34136686	34136827	34134290	34134398	1505	11377	333341347304	5184	273319254261	63	50	0.316792	1	0.026,0.007,0.016,0.018	0.014,0.002,0.024,0.012	0.004	chr15:34134398-34136674(+)	chr15:34134398-34136687(+)
ENSMUSG00000027667	Zfp639	chr3	+	32515283	32517139	32517028	32517139	32514383	32514454	1512	30244240	148710	16362811	1142	100	50	0.000779389	0.0250482	0.517,0.6,0.75,0.667	0.889,0.947,0.778,0.733	-0.203	chr3:32514454-32515284(+)	chr3:32514454-32517029(+)
ENSMUSG00000001844	Zdhhc4	chr5	-	143324131	143324398	143324131	143324310	143324884	143324958	1513	38444342	72798179	40334031	75534970	100	50	0.616393	1	0.209,0.218,0.21,0.21	0.211,0.237,0.29,0.181	-0.018	chr5:143324398-143324885(-)	chr5:143324310-143324885(-)
ENSMUSG00000001844	Zdhhc4	chr5	-	143326098	143326305	143326098	143326223	143328390	143328570	1514	113615	9411410199	15121410	99798166	100	50	0.0107445	0.155559	0.055,0.013,0.029,0.07	0.07,0.071,0.08,0.07	-0.031	chr5:143326305-143328391(-)	chr5:143326223-143328391(-)
ENSMUSG00000009281	Rarres2	chr6	-	48569940	48570062	48569940	48570059	48570243	48570339	1515	200	212	1212	1131	53	50	1	1	NA,0.485,0.0,0.0	0.485,0.654,0.239,0.654	-0.346	chr6:48570062-48570244(-)	chr6:48570059-48570244(-)
ENSMUSG00000039477	Tnrc18	chr5	-	142773618	142774048	142773618	142774045	142775208	142775399	1518	43393118	4480	29241725	4660	53	50	0.472536	1	0.91,0.902,0.785,1.0	0.872,0.791,0.728,1.0	0.051	chr5:142774048-142775209(-)	chr5:142774045-142775209(-)
ENSMUSG00000032295	Man2c1	chr9	+	57139610	57139708	57139687	57139708	57139245	57139401	1520	155167120130	1123	127115116111	1211	100	50	0.842483	1	0.987,0.988,0.968,0.956	0.984,0.966,0.983,0.982	-0.004	chr9:57139401-57139611(+)	chr9:57139401-57139688(+)
ENSMUSG00000001416	Cct3	chr3	+	88313090	88313374	88313241	88313374	88311672	88311822	1524	14131315	8827171019824	1020137	632837726746	100	50	1	1	0.008,0.009,0.006,0.009	0.008,0.012,0.009,0.005	0	chr3:88311822-88313091(+)	chr3:88311822-88313242(+)
ENSMUSG00000026853	Crat	chr2	-	30403488	30403641	30403488	30403626	30404527	30404590	1526	6764	47203128	9384	34342435	65	50	0.916432	1	0.089,0.212,0.13,0.099	0.169,0.064,0.204,0.081	0.003	chr2:30403641-30404528(-)	chr2:30403626-30404528(-)
ENSMUSG00000003235	Eif2b5	chr16	+	20508937	20509323	20508960	20509323	20508708	20508819	1528	42	217196254234	1111	197221179197	73	50	1	1	0.0,0.0,0.011,0.006	0.003,0.003,0.004,0.003	0.001	chr16:20508819-20508938(+)	chr16:20508819-20508961(+)
ENSMUSG00000032187	Smarca4	chr9	+	21686012	21686275	21686021	21686275	21678928	21679147	1529	132130133104	158147192113	126799583	136147126122	59	50	0.268797	1	0.415,0.428,0.37,0.438	0.44,0.313,0.39,0.366	0.036	chr9:21679147-21686013(+)	chr9:21679147-21686022(+)
ENSMUSG00000032187	Smarca4	chr9	+	21699799	21699908	21699802	21699908	21686021	21686275	1531	174161205134	56568641	110154118133	41364642	53	50	0.497132	1	0.746,0.731,0.692,0.755	0.717,0.801,0.708,0.749	-0.013	chr9:21686275-21699800(+)	chr9:21686275-21699803(+)
ENSMUSG00000047757	Fancb	chrX	+	164992703	164992894	164992730	164992894	164991544	164991688	1535	101	86104	1	2958	77	50	1	1	0.0,0.098,0.0,0.14	0.0,0.0,0.0,0.075	0.041	chrX:164991688-164992704(+)	chrX:164991688-164992731(+)
ENSMUSG00000002319	Ipo4	chr14	-	55628591	55628684	55628591	55628639	55628793	55628987	1541	3555	54507356	3752	55734659	95	50	0.86532	1	0.028,0.05,0.035,0.045	0.028,0.048,0.054,0.018	0.003	chr14:55628684-55628794(-)	chr14:55628639-55628794(-)
ENSMUSG00000085396	Firre	chrX	-	50627206	50627309	50627206	50627250	50630890	50630995	1542	71365	4222	3963	6227	100	50	0.0954364	0.61443	0.467,0.765,0.6,0.556	0.2,0.692,0.6,0.176	0.18	chrX:50627309-50630891(-)	chrX:50627250-50630891(-)
ENSMUSG00000005982	Naa60	chr16	+	3900642	3900877	3900692	3900877	3899871	3899968	1543	310304333286	147139	274266294255	106136	100	50	0.685522	1	0.917,0.956,0.928,0.941	0.932,0.957,0.919,0.955	-0.005	chr16:3899968-3900643(+)	chr16:3899968-3900693(+)
ENSMUSG00000032000	Birc3	chr9	-	7850919	7851171	7850919	7851086	7854366	7854606	1547	81726647	1000	58575569	1000	100	50	1	1	0.976,1.0,1.0,1.0	0.967,1.0,1.0,1.0	0.002	chr9:7851171-7854367(-)	chr9:7851086-7854367(-)
ENSMUSG00000030541	Idh2	chr7	-	80098135	80098381	80098135	80098272	80098770	80098914	1548	40404039	776726782780	33313139	841582637621	100	50	0.807922	1	0.025,0.027,0.025,0.024	0.019,0.026,0.024,0.03	0.001	chr7:80098381-80098771(-)	chr7:80098272-80098771(-)
ENSMUSG00000020464	Pnpt1	chr11	+	29133851	29133926	29133855	29133926	29132844	29132905	1549	707510585	252	55866067	2133	54	50	0.729382	1	1.0,0.972,0.951,0.975	0.962,0.988,0.949,0.954	0.011	chr11:29132905-29133852(+)	chr11:29132905-29133856(+)
ENSMUSG00000036112	Metap2	chr10	-	93879539	93879636	93879539	93879573	93880072	93880138	1552	540525632532	1414157	439555435462	4953	100	50	0.00327152	0.0691569	0.951,0.949,0.955,0.974	0.982,0.969,0.978,0.987	-0.022	chr10:93879636-93880073(-)	chr10:93879573-93880073(-)
ENSMUSG00000036112	Metap2	chr10	-	93879539	93879642	93879539	93879573	93880072	93880138	1553	996102112161040	1414157	9191069881865	4953	100	50	0.00253591	0.0582816	0.973,0.973,0.976,0.987	0.991,0.983,0.989,0.993	-0.012	chr10:93879642-93880073(-)	chr10:93879573-93880073(-)
ENSMUSG00000036112	Metap2	chr10	-	93879539	93879672	93879539	93879573	93880072	93880138	1554	540526632532	1414157	439558441461	4953	100	50	0.00312436	0.0671229	0.951,0.949,0.955,0.974	0.982,0.969,0.978,0.987	-0.022	chr10:93879672-93880073(-)	chr10:93879573-93880073(-)
ENSMUSG00000036112	Metap2	chr10	-	93879539	93879642	93879539	93879636	93880072	93880138	1555	650680790693	0	636725613534	1	56	50	1	1	1.0,1.0,1.0,1.0	1.0,1.0,1.0,0.998	0	chr10:93879642-93880073(-)	chr10:93879636-93880073(-)
ENSMUSG00000036112	Metap2	chr10	-	93879539	93879672	93879539	93879636	93880072	93880138	1556	195185210188	0	157218176135	1	86	50	1	1	1.0,1.0,1.0,1.0	1.0,1.0,1.0,0.987	0.003	chr10:93879672-93880073(-)	chr10:93879636-93880073(-)
ENSMUSG00000036112	Metap2	chr10	-	93879539	93879672	93879539	93879642	93880072	93880138	1557	1143	456496584508	1795	480514446404	80	50	1	1	0.001,0.001,0.004,0.004	0.001,0.008,0.012,0.008	-0.005	chr10:93879672-93880073(-)	chr10:93879642-93880073(-)
ENSMUSG00000036112	Metap2	chr10	-	93886993	93887101	93886993	93887098	93889537	93889814	1558	487479626501	52546766	388497460471	57494644	53	50	0.648137	1	0.898,0.893,0.898,0.877	0.865,0.905,0.904,0.91	-0.005	chr10:93887101-93889538(-)	chr10:93887098-93889538(-)
ENSMUSG00000040383	Aqr	chr2	-	114158869	114159159	114158869	114159010	114161563	114161684	1560	320	86559388	1022	64775769	100	50	1	1	0.0,0.027,0.011,0.0	0.008,0.0,0.017,0.014	0	chr2:114159159-114161564(-)	chr2:114159010-114161564(-)
ENSMUSG00000000131	Xpo6	chr7	-	126104703	126104934	126104703	126104789	126105100	126105199	1563	230226257205	1221	193224207206	1701	100	50	0.889571	1	0.991,0.983,0.985,0.99	0.99,0.941,1.0,0.99	0.007	chr7:126104934-126105101(-)	chr7:126104789-126105101(-)
ENSMUSG00000000131	Xpo6	chr7	-	126108785	126108900	126108785	126108855	126109913	126110069	1564	212195217194	1000	194229187178	110	95	50	1	1	0.991,1.0,1.0,1.0	1.0,0.992,0.99,1.0	0.002	chr7:126108900-126109914(-)	chr7:126108855-126109914(-)
ENSMUSG00000000131	Xpo6	chr7	-	126129547	126129640	126129547	126129637	126131025	126131134	1565	10811612293	45127	901159683	7457	53	50	0.792764	1	0.962,0.956,0.906,0.926	0.924,0.964,0.948,0.918	-0.001	chr7:126129640-126131026(-)	chr7:126129637-126131026(-)
ENSMUSG00000034801	Sos2	chr12	-	69618055	69618183	69618055	69618180	69627216	69627315	1566	38314326	5451	35552926	4121	53	50	0.0698194	0.517794	0.878,0.88,0.89,0.961	0.892,0.981,0.932,0.961	-0.039	chr12:69618183-69627217(-)	chr12:69618180-69627217(-)
ENSMUSG00000041975	Mettl8	chr2	-	70981854	70982195	70981854	70981967	70993483	70993575	1567	48362526	26162112	66696653	511914	100	50	8.01719e-07	0.000113185	0.48,0.529,0.373,0.52	0.868,0.758,0.786,0.654	-0.291	chr2:70982195-70993484(-)	chr2:70981967-70993484(-)
ENSMUSG00000031295	Phka2	chrX	+	160590165	160590368	160590167	160590368	160588964	160589018	1569	4231	119112126113	3165	1011329397	52	50	0.168345	0.847727	0.031,0.017,0.022,0.008	0.028,0.007,0.058,0.047	-0.015	chrX:160589018-160590166(+)	chrX:160589018-160590168(+)
ENSMUSG00000030577	Cd22	chr7	-	30877438	30877917	30877438	30877843	30878049	30878107	1574	0	200	100	1330	100	50	1	1	NA,0.0,NA,NA	0.0,0.143,0.0,NA	-0.048	chr7:30877917-30878050(-)	chr7:30877843-30878050(-)
ENSMUSG00000030577	Cd22	chr7	-	30879928	30880031	30879928	30880017	30880235	30880278	1575	100	0	1103	1220	64	50	1	1	NA,1.0,NA,NA	0.439,0.281,0.0,1.0	0.57	chr7:30880031-30880236(-)	chr7:30880017-30880236(-)
ENSMUSG00000027088	Phospho2	chr2	+	69792336	69792491	69792372	69792491	69790285	69790321	1576	40455154	108113	56445155	4722	86	50	0.00968546	0.146692	0.699,0.766,0.729,0.913	0.891,0.785,0.937,0.941	-0.112	chr2:69790321-69792337(+)	chr2:69790321-69792373(+)
ENSMUSG00000030846	Tial1	chr7	-	128446730	128447107	128446730	128446798	128448120	128448208	1579	1216612	10858	13171012	4784	100	50	0.223791	0.978592	0.375,0.5,0.375,0.429	0.619,0.548,0.385,0.6	-0.118	chr7:128447107-128448121(-)	chr7:128446798-128448121(-)
ENSMUSG00000030846	Tial1	chr7	-	128448620	128448770	128448620	128448719	128454935	128455032	1580	31283234	151130149113	35494638	139142106121	100	50	0.0151278	0.198672	0.093,0.097,0.097,0.131	0.112,0.147,0.178,0.136	-0.039	chr7:128448770-128454936(-)	chr7:128448719-128454936(-)
ENSMUSG00000054641	Mmrn1	chr6	+	60987073	60987226	60987076	60987226	60975817	60977794	1583	6202616	4492	10486	315	53	50	0.816948	1	0.586,0.825,0.732,0.883	1.0,0.557,0.883,0.531	0.014	chr6:60977794-60987074(+)	chr6:60977794-60987077(+)
ENSMUSG00000002227	Mov10	chr3	-	104817935	104818156	104817935	104818121	104818356	104818563	1585	2282	21	1504	0	85	50	1	1	1.0,1.0,0.702,0.541	1.0,1.0,NA,1.0	-0.189	chr3:104818156-104818357(-)	chr3:104818121-104818357(-)
ENSMUSG00000072825	Cep170b	chr12	+	112740773	112741011	112740878	112741011	112737838	112739509	1587	6197	120	6638	0	100	50	1	1	1.0,0.333,0.692,1.0	1.0,1.0,1.0,1.0	-0.244	chr12:112739509-112740774(+)	chr12:112739509-112740879(+)
ENSMUSG00000023930	Crisp2	chr17	-	40786138	40786269	40786138	40786255	40790586	40790664	1588	0	2130	1	11	64	50	1	1	0.0,0.0,0.0,NA	NA,NA,0.0,0.439	-0.22	chr17:40786269-40790587(-)	chr17:40786255-40790587(-)
ENSMUSG00000035212	Leprot	chr4	+	101656108	101656295	101656177	101656295	101652398	101652474	1589	339380478354	1000	282392358353	0	100	50	1	1	0.994,1.0,1.0,1.0	1.0,1.0,1.0,1.0	-0.002	chr4:101652474-101656109(+)	chr4:101652474-101656178(+)
ENSMUSG00000061689	Dlgap4	chr2	+	156748022	156748420	156748331	156748420	156745834	156746196	1590	76142	10181312	2812	14172819	100	50	0.00261255	0.0596961	0.259,0.143,0.35,0.077	0.067,0.19,0.018,0.05	0.126	chr2:156746196-156748023(+)	chr2:156746196-156748332(+)
ENSMUSG00000001228	Uhrf1	chr17	+	56313040	56313251	56313064	56313251	56312863	56312967	1591	370294361340	33263638	324312288293	31373430	74	50	0.470537	1	0.883,0.884,0.871,0.858	0.876,0.851,0.851,0.868	0.013	chr17:56312967-56313041(+)	chr17:56312967-56313065(+)
ENSMUSG00000026977	March7	chr2	+	60233898	60234997	60233933	60234997	60232199	60232367	1593	88717578	1561315	88997984	3263	85	50	1.12386e-06	0.00014625	0.775,0.874,0.772,0.754	0.945,0.967,0.886,0.943	-0.141	chr2:60232367-60233899(+)	chr2:60232367-60233934(+)
ENSMUSG00000037503	Fam168b	chr1	-	34819591	34819790	34819591	34819769	34819866	34820009	1594	43425047	188182194185	23223242	182152190171	71	50	0.0139752	0.186007	0.139,0.14,0.154,0.152	0.082,0.092,0.106,0.147	0.04	chr1:34819790-34819867(-)	chr1:34819769-34819867(-)
ENSMUSG00000037503	Fam168b	chr1	-	34819866	34819963	34819866	34819920	34828766	34828847	1598	175132184134	5320	132147128152	3223	93	50	0.883936	1	0.95,0.959,0.98,1.0	0.959,0.975,0.972,0.965	0.005	chr1:34819963-34828767(-)	chr1:34819920-34828767(-)
ENSMUSG00000037503	Fam168b	chr1	-	34819866	34820009	34819866	34819920	34828766	34828847	1599	282227321222	5320	244278232275	3223	100	50	0.979994	1	0.966,0.974,0.988,1.0	0.976,0.986,0.983,0.979	0.001	chr1:34820009-34828767(-)	chr1:34819920-34828767(-)
ENSMUSG00000037503	Fam168b	chr1	-	34819866	34820009	34819866	34819963	34828766	34828847	1600	248246314234	5811	233247236265	2334	96	50	0.632117	1	0.963,0.941,0.994,0.992	0.984,0.977,0.976,0.972	-0.005	chr1:34820009-34828767(-)	chr1:34819963-34828767(-)
ENSMUSG00000026826	Nr4a2	chr2	-	57108560	57108739	57108560	57108618	57109062	57109265	1601	9259	3022	9366	2112	100	50	0.656048	1	0.6,1.0,0.556,0.692	0.692,0.6,0.75,0.6	0.051	chr2:57108739-57109063(-)	chr2:57108618-57109063(-)
ENSMUSG00000026826	Nr4a2	chr2	-	57112950	57113289	57112950	57113072	57114717	57115038	1603	1111	0	100	100	100	50	1	1	1.0,1.0,1.0,1.0	NA,0.333,NA,NA	0.667	chr2:57113289-57114718(-)	chr2:57113072-57114718(-)
ENSMUSG00000026749	Nek6	chr2	+	38557815	38557956	38557855	38557956	38550552	38550671	1604	32342644	21	28173433	1100	90	50	1	1	1.0,1.0,0.878,0.961	0.94,0.904,1.0,1.0	-0.001	chr2:38550671-38557816(+)	chr2:38550671-38557856(+)
ENSMUSG00000041406	BC055324	chr1	-	163955336	163955456	163955336	163955452	163956827	163956908	1605	31364033	2000	35473235	12	54	50	1	1	0.935,1.0,1.0,1.0	1.0,1.0,0.967,0.942	0.007	chr1:163955456-163956828(-)	chr1:163955452-163956828(-)
ENSMUSG00000019790	Stxbp5	chr10	-	9769340	9769710	9769340	9769534	9770449	9770689	1608	182178123152	171075	199184186145	5323	100	50	2.3458e-05	0.00157169	0.843,0.899,0.898,0.938	0.952,0.968,0.979,0.96	-0.07	chr10:9769710-9770450(-)	chr10:9769534-9770450(-)
ENSMUSG00000019790	Stxbp5	chr10	-	9778020	9778071	9778020	9778066	9789362	9789428	1609	64717557	0	65464555	10	55	50	1	1	1.0,1.0,1.0,1.0	1.0,1.0,0.976,1.0	0.006	chr10:9778071-9789363(-)	chr10:9778066-9789363(-)
ENSMUSG00000032178	Ilf3	chr9	+	21388508	21388753	21388523	21388753	21387699	21387797	1610	9131215	57677759	951110	48734643	65	50	0.573045	1	0.108,0.13,0.107,0.164	0.126,0.05,0.155,0.152	0.007	chr9:21387797-21388509(+)	chr9:21387797-21388524(+)
ENSMUSG00000032178	Ilf3	chr9	+	21399112	21399250	21399124	21399250	21397968	21398136	1613	6277	230237240228	3463	198183167189	62	50	0.676263	1	0.021,0.007,0.023,0.024	0.012,0.017,0.028,0.013	0.001	chr9:21398136-21399113(+)	chr9:21398136-21399125(+)
ENSMUSG00000027763	Mbnl1	chr3	+	60615619	60615773	60615724	60615773	60613262	60613520	1614	506467569460	26312436	456557464511	15171313	100	50	4.0647e-05	0.00263406	0.907,0.883,0.922,0.865	0.938,0.942,0.947,0.952	-0.05	chr3:60613520-60615620(+)	chr3:60613520-60615725(+)
ENSMUSG00000026761	Orc4	chr2	-	48910185	48910294	48910185	48910242	48912561	48912648	1616	53497474	2854	681078867	31275	100	50	0.709605	1	0.93,0.754,0.881,0.902	0.919,0.817,0.863,0.87	0	chr2:48910294-48912562(-)	chr2:48910242-48912562(-)
ENSMUSG00000038866	Zcchc2	chr1	+	106027387	106027531	106027402	106027531	106023663	106023758	1617	13787	20111414	3678	6242117	65	50	0.09465	0.611358	0.333,0.329,0.305,0.278	0.278,0.161,0.204,0.266	0.084	chr1:106023758-106027388(+)	chr1:106023758-106027403(+)
ENSMUSG00000036928	Stag3	chr5	+	138299319	138299428	138299338	138299428	138299130	138299223	1618	0	3845	1100	5704	69	50	1	1	0.0,0.0,0.0,0.0	0.127,0.094,NA,0.0	-0.074	chr5:138299223-138299320(+)	chr5:138299223-138299339(+)
ENSMUSG00000027361	Gabpb1	chr2	-	126646562	126646748	126646562	126646745	126650067	126650181	1619	80749475	9936	75677357	76710	53	50	0.332733	1	0.893,0.886,0.967,0.922	0.91,0.913,0.908,0.843	0.024	chr2:126646748-126650068(-)	chr2:126646745-126650068(-)
ENSMUSG00000041890	Git2	chr5	-	114752278	114752330	114752278	114752327	114753278	114753324	1621	69666561	80917969	54684551	63645183	53	50	0.894924	1	0.449,0.406,0.437,0.455	0.447,0.501,0.454,0.367	-0.005	chr5:114752330-114753279(-)	chr5:114752327-114753279(-)
ENSMUSG00000034135	Sik3	chr9	+	46211669	46212562	46211849	46212562	46210475	46210815	1626	67668858	1	63545458	1020	100	50	1	1	1.0,1.0,1.0,0.967	0.969,1.0,0.931,1.0	0.017	chr9:46210815-46211670(+)	chr9:46210815-46211850(+)
ENSMUSG00000018669	Cdk5rap3	chr11	-	96912216	96912436	96912216	96912395	96913005	96913054	1629	1418611	190186176203	6678	149124131124	91	50	0.259703	1	0.039,0.05,0.018,0.029	0.022,0.026,0.029,0.034	0.006	chr11:96912436-96913006(-)	chr11:96912395-96913006(-)
ENSMUSG00000018669	Cdk5rap3	chr11	-	96913664	96913877	96913664	96913796	96916150	96916196	1630	5925	186204192137	7423	149164103114	100	50	0.928322	1	0.013,0.022,0.005,0.018	0.023,0.012,0.01,0.013	0	chr11:96913877-96916151(-)	chr11:96913796-96916151(-)
ENSMUSG00000039958	Etfbkmt	chr6	+	149144014	149144442	149144033	149144442	149141512	149141704	1631	110	2441	11	3753	69	50	1	1	0.0,0.153,0.153,0.0	0.0,0.0,0.127,0.195	-0.004	chr6:149141704-149144015(+)	chr6:149141704-149144034(+)
ENSMUSG00000039958	Etfbkmt	chr6	+	149144014	149144442	149144033	149144442	149142605	149142715	1632	110	5593	10	4268	69	50	1	1	0.0,0.127,0.075,0.0	0.0,0.0,0.108,0.0	0.024	chr6:149142715-149144015(+)	chr6:149142715-149144034(+)
ENSMUSG00000028689	Ccdc163	chr4	+	116709437	116709619	116709481	116709619	116709239	116709273	1635	36495948	1120	66604744	5414	94	50	0.00239128	0.0571809	0.95,0.963,0.94,1.0	0.875,0.889,0.962,0.854	0.068	chr4:116709273-116709438(+)	chr4:116709273-116709482(+)
ENSMUSG00000028689	Ccdc163	chr4	+	116711285	116711378	116711310	116711378	116710100	116710284	1637	3632	27162626	6723	33232319	75	50	0.507439	1	0.069,0.2,0.071,0.049	0.108,0.169,0.055,0.095	-0.01	chr4:116710284-116711286(+)	chr4:116710284-116711311(+)
ENSMUSG00000028689	Ccdc163	chr4	+	116714015	116714149	116714087	116714149	116712722	116712826	1640	6121610	18181314	15121412	16211413	100	50	0.530997	1	0.143,0.25,0.381,0.263	0.319,0.222,0.333,0.316	-0.038	chr4:116712826-116714016(+)	chr4:116712826-116714088(+)
ENSMUSG00000036860	Mrpl55	chr11	+	59204534	59204757	59204555	59204757	59204171	59204255	1643	34494131	32373244	23312325	61425560	71	50	6.2285e-05	0.00346778	0.428,0.483,0.474,0.332	0.21,0.342,0.227,0.227	0.178	chr11:59204255-59204535(+)	chr11:59204255-59204556(+)
ENSMUSG00000073702	Rpl31	chr1	+	39370953	39371066	39371008	39371066	39370013	39370139	1644	4798618065975094	1042	4903546241715107	300	100	50	1	1	1.0,1.0,0.999,0.999	1.0,0.999,1.0,1.0	0	chr1:39370139-39370954(+)	chr1:39370139-39371009(+)
ENSMUSG00000036825	Ssx2ip	chr3	+	146432972	146433146	146432975	146433146	146432480	146432617	1645	19322740	18162421	25463232	13272214	53	50	0.423674	1	0.499,0.654,0.515,0.642	0.645,0.616,0.578,0.683	-0.053	chr3:146432617-146432973(+)	chr3:146432617-146432976(+)
ENSMUSG00000000838	Fmr1	chrX	+	68712230	68712413	68712305	68712413	68710583	68710779	1650	961038276	25172821	108115120111	19171512	100	50	0.00240122	0.0571809	0.658,0.752,0.594,0.644	0.74,0.772,0.8,0.822	-0.122	chrX:68710779-68712231(+)	chrX:68710779-68712306(+)
ENSMUSG00000000838	Fmr1	chrX	+	68715513	68717963	68715564	68717963	68713240	68713323	1651	5110	72728857	2022	66785959	100	50	1	1	0.034,0.007,0.006,0.0	0.015,0.0,0.017,0.017	-0.001	chrX:68713323-68715514(+)	chrX:68713323-68715565(+)
ENSMUSG00000041718	Alg13	chrX	+	144319898	144320061	144320002	144320061	144318022	144318121	1653	15191715	21	25432325	2131	100	50	0.0441641	0.398586	1.0,1.0,0.81,0.882	0.862,0.956,0.793,0.926	0.039	chrX:144318121-144319899(+)	chrX:144318121-144320003(+)
ENSMUSG00000029674	Limk1	chr5	-	134662102	134662162	134662102	134662157	134664184	134664316	1654	61636774	1000	73614956	102	55	50	1	1	0.982,1.0,1.0,1.0	1.0,0.982,1.0,0.962	0.01	chr5:134662162-134664185(-)	chr5:134662157-134664185(-)
ENSMUSG00000028906	Epb41	chr4	-	131967787	131967975	131967787	131967972	131974683	131974856	1659	13815315091	1692614	139151133147	1542114	53	50	0.217645	0.966168	0.891,0.941,0.845,0.86	0.897,0.973,0.857,0.908	-0.025	chr4:131967975-131974684(-)	chr4:131967972-131974684(-)
ENSMUSG00000039660	Spout1	chr2	-	30175918	30176002	30175918	30175991	30176361	30176492	1661	14222812	15698164107	1313117	105100108100	61	50	0.114956	0.676926	0.069,0.155,0.123,0.084	0.092,0.096,0.077,0.054	0.028	chr2:30176002-30176362(-)	chr2:30175991-30176362(-)
ENSMUSG00000028573	Fggy	chr4	+	95820881	95822125	95821977	95822125	95812107	95812169	1662	1110	8458	1	67102	100	50	1	1	0.059,0.111,0.091,0.0	0.0,0.0,0.0,0.2	0.015	chr4:95812169-95820882(+)	chr4:95812169-95821978(+)
ENSMUSG00000006732	Mettl1	chr10	+	127044996	127045127	127045025	127045127	127044755	127044869	1664	881510	124126131124	45105	10211010991	79	50	0.161786	0.825213	0.039,0.039,0.068,0.049	0.024,0.028,0.055,0.034	0.013	chr10:127044869-127044997(+)	chr10:127044869-127045026(+)
ENSMUSG00000051113	Fam71e1	chr7	+	44497405	44497633	44497502	44497633	44496914	44497033	1667	0	100	1000	102	100	50	1	1	NA,0.0,NA,NA	1.0,0.0,NA,0.0	-0.333	chr7:44497033-44497406(+)	chr7:44497033-44497503(+)
ENSMUSG00000089832	Shkbp1	chr7	-	27342645	27342760	27342645	27342757	27343242	27343421	1669	134151153103	97109	81111111112	513612	53	50	0.278608	1	0.934,0.953,0.935,0.915	0.939,0.89,0.946,0.898	0.016	chr7:27342760-27343243(-)	chr7:27342757-27343243(-)
ENSMUSG00000089832	Shkbp1	chr7	-	27351979	27352128	27351979	27352070	27352594	27352756	1672	3044	60757362	2241	72536467	100	50	0.652482	1	0.024,0.0,0.027,0.031	0.014,0.019,0.03,0.007	0.003	chr7:27352128-27352595(-)	chr7:27352070-27352595(-)
ENSMUSG00000040528	Milr1	chr11	+	106761182	106761296	106761185	106761296	106754781	106755051	1673	41583344	10	41614442	0	53	50	1	1	1.0,1.0,0.969,1.0	1.0,1.0,1.0,1.0	-0.008	chr11:106755051-106761183(+)	chr11:106755051-106761186(+)
ENSMUSG00000018974	Sart3	chr5	-	113754232	113754371	113754232	113754327	113755369	113755525	1674	179152235195	3445	153229188177	22	94	50	0.00415663	0.0821557	0.969,0.953,0.969,0.954	1.0,1.0,0.98,0.979	-0.029	chr5:113754371-113755370(-)	chr5:113754327-113755370(-)
ENSMUSG00000015656	Hspa8	chr9	+	40801917	40802127	40801988	40802127	40801301	40801348	1676	7081552281626110	333	4566796661686053	712	100	50	1	1	1.0,0.999,0.999,0.999	1.0,0.998,1.0,0.999	0	chr9:40801348-40801918(+)	chr9:40801348-40801989(+)
ENSMUSG00000015656	Hspa8	chr9	+	40802738	40802891	40802795	40802891	40802417	40802623	1678	9.54277e+16	3044	4.12111e+16	3285	100	50	1	1	0.999,1.0,0.999,0.999	0.999,1.0,0.998,0.999	0	chr9:40802623-40802739(+)	chr9:40802623-40802796(+)
ENSMUSG00000036281	Snapc4	chr2	-	26374491	26374564	26374491	26374560	26374642	26374747	1679	30473630	1016	29382419	200	54	50	0.0537833	0.448995	0.965,1.0,0.971,0.822	1.0,0.946,1.0,1.0	-0.047	chr2:26374564-26374643(-)	chr2:26374560-26374643(-)
ENSMUSG00000028898	Trnau1ap	chr4	-	132325207	132326045	132325207	132325260	132328468	132328566	1680	65577065	7141	64605543	5113	100	50	0.7991	1	0.823,0.966,0.897,0.97	0.865,0.968,0.965,0.878	-0.005	chr4:132326045-132328469(-)	chr4:132325260-132328469(-)
ENSMUSG00000026933	Camsap1	chr2	-	25935461	25935564	25935461	25935561	25935849	25936058	1681	13152218	3623	6241812	143	53	50	0.20794	0.943727	0.803,0.702,0.912,0.85	1.0,0.958,0.809,0.791	-0.073	chr2:25935564-25935850(-)	chr2:25935561-25935850(-)
ENSMUSG00000015087	Rabl6	chr2	-	25598144	25598197	25598144	25598192	25601350	25601398	1682	153137189141	10657	133146122129	5359	55	50	0.694586	1	0.933,0.954,0.972,0.948	0.96,0.978,0.957,0.929	-0.004	chr2:25598197-25601351(-)	chr2:25598192-25601351(-)
ENSMUSG00000034610	Tut4	chr4	+	108549225	108549413	108549240	108549413	108548054	108548170	1686	20131514	24262018	1216712	25342026	65	50	0.064913	0.494414	0.391,0.278,0.366,0.374	0.27,0.266,0.212,0.262	0.1	chr4:108548170-108549226(+)	chr4:108548170-108549241(+)
ENSMUSG00000038425	Poli	chr18	-	70525375	70525528	70525375	70525459	70526556	70526721	1687	46454939	5575	43414139	3624	100	50	0.328443	1	0.821,0.818,0.778,0.796	0.878,0.774,0.911,0.83	-0.045	chr18:70525528-70526557(-)	chr18:70525459-70526557(-)
ENSMUSG00000031004	Mki67	chr7	-	135707360	135708320	135707360	135707486	135708765	135708811	1688	158132155134	2010	129161131128	1000	100	50	1	1	0.975,1.0,0.987,1.0	0.985,1.0,1.0,1.0	-0.006	chr7:135708320-135708766(-)	chr7:135707486-135708766(-)
ENSMUSG00000037922	Bank1	chr3	-	136100280	136100589	136100280	136100382	136103849	136103928	1689	5111	1	1013	0	100	50	1	1	1.0,1.0,1.0,0.333	1.0,NA,1.0,1.0	-0.167	chr3:136100589-136103850(-)	chr3:136100382-136103850(-)
ENSMUSG00000027104	Atf2	chr2	-	73880284	73880381	73880284	73880379	73892474	73892628	1690	48434348	1122	49614037	2111	52	50	1	1	0.979,0.976,0.954,0.958	0.959,0.983,0.975,0.973	-0.006	chr2:73880381-73892475(-)	chr2:73880379-73892475(-)
ENSMUSG00000006335	Tfpt	chr7	-	3628827	3629112	3628827	3629086	3629551	3629579	1692	1420	47525140	1221	47474643	76	50	0.762698	1	0.014,0.048,0.025,0.0	0.014,0.027,0.028,0.015	0.001	chr7:3629112-3629552(-)	chr7:3629086-3629552(-)
ENSMUSG00000031537	Ikbkb	chr8	-	22669606	22669730	22669606	22669725	22671630	22671745	1693	130114122101	3212	11389102116	2011	55	50	0.590262	1	0.975,0.981,0.991,0.979	0.981,1.0,0.989,0.991	-0.009	chr8:22669730-22671631(-)	chr8:22669725-22671631(-)
ENSMUSG00000029106	Add1	chr5	+	34629135	34629172	34629138	34629172	34628414	34628513	1694	19262622	1023	17333828	362	53	50	0.247355	1	0.947,1.0,0.925,0.874	1.0,0.912,0.857,0.93	0.012	chr5:34628513-34629136(+)	chr5:34628513-34629139(+)
ENSMUSG00000038517	Tbkbp1	chr11	-	97146454	97146633	97146454	97146630	97147372	97147553	1697	24221915	1415127	1719167	111453	53	50	0.727186	1	0.618,0.58,0.599,0.669	0.593,0.561,0.751,0.688	-0.032	chr11:97146633-97147373(-)	chr11:97146630-97147373(-)
ENSMUSG00000040782	Cop1	chr1	+	159319723	159319840	159319747	159319840	159308882	159308964	1700	107709597	10	70856665	0	74	50	1	1	1.0,1.0,0.985,1.0	1.0,1.0,1.0,1.0	-0.004	chr1:159308964-159319724(+)	chr1:159308964-159319748(+)
ENSMUSG00000033124	Atg9a	chr1	-	75186189	75187186	75186189	75186938	75187684	75187826	1702	10943	48475644	64107	35473748	100	50	0.541415	1	0.094,0.087,0.034,0.033	0.079,0.041,0.119,0.068	-0.015	chr1:75187186-75187685(-)	chr1:75186938-75187685(-)
ENSMUSG00000035236	Scai	chr2	-	39080373	39080547	39080373	39080465	39083537	39083610	1704	1410814	2100	91236	0	100	50	1	1	0.778,0.833,1.0,1.0	1.0,1.0,1.0,1.0	-0.097	chr2:39080547-39083538(-)	chr2:39080465-39083538(-)
ENSMUSG00000027843	Ptpn22	chr3	+	103903369	103903485	103903377	103903485	103902113	103902191	1707	64785650	0	70595162	1100	58	50	1	1	1.0,1.0,1.0,1.0	0.984,0.981,1.0,1.0	0.009	chr3:103902191-103903370(+)	chr3:103902191-103903378(+)
ENSMUSG00000068115	Ninl	chr2	-	150966077	150966364	150966077	150966242	150969979	150970132	1708	11	2477	100	2113	100	50	1	1	0.0,0.0,0.067,0.067	0.0,0.333,0.0,0.0	-0.05	chr2:150966364-150969980(-)	chr2:150966242-150969980(-)
ENSMUSG00000026427	Eif2d	chr1	+	131160409	131160624	131160462	131160624	131158191	131158299	1710	184194220167	2030	235243197206	21	100	50	1	1	0.979,1.0,0.973,1.0	1.0,1.0,0.98,0.99	-0.004	chr1:131158299-131160410(+)	chr1:131158299-131160463(+)
ENSMUSG00000020220	Vps13d	chr4	-	145099964	145100070	145099964	145100067	145103613	145103688	1711	1241	1210	2401	110	53	50	0.53069	1	0.485,0.485,0.791,1.0	1.0,0.791,0.0,1.0	-0.007	chr4:145100070-145103614(-)	chr4:145100067-145103614(-)
ENSMUSG00000003421	Nosip	chr7	+	45076551	45076739	45076626	45076739	45076309	45076428	1715	295381336290	27262819	270252251235	17131210	100	50	0.0238354	0.267422	0.845,0.88,0.857,0.884	0.888,0.906,0.913,0.922	-0.041	chr7:45076428-45076552(+)	chr7:45076428-45076627(+)
ENSMUSG00000014599	Csf1	chr3	-	107748153	107749169	107748153	107748284	107750310	107750458	1716	12141013	1	25161519	2000	100	50	1	1	1.0,1.0,1.0,0.867	0.862,1.0,1.0,1.0	0.001	chr3:107749169-107750311(-)	chr3:107748284-107750311(-)
ENSMUSG00000017418	Arl5b	chr2	+	15069819	15069967	15069836	15069967	15068138	15068199	1717	165712	0	1312116	100	67	50	1	1	1.0,1.0,1.0,1.0	1.0,0.9,1.0,1.0	0.025	chr2:15068199-15069820(+)	chr2:15068199-15069837(+)
ENSMUSG00000017418	Arl5b	chr2	+	15069819	15069967	15069857	15069967	15068138	15068199	1718	189818	11	1512129	2110	88	50	0.613101	1	1.0,1.0,0.82,0.911	0.81,0.872,0.872,1.0	0.044	chr2:15068199-15069820(+)	chr2:15068199-15069858(+)
ENSMUSG00000017418	Arl5b	chr2	+	15069836	15069967	15069857	15069967	15068138	15068199	1719	2416	11	2113	2110	71	50	0.472693	1	1.0,1.0,0.413,0.809	0.413,0.413,0.413,1.0	0.246	chr2:15068199-15069837(+)	chr2:15068199-15069858(+)
ENSMUSG00000018796	Acsl1	chr8	+	46533365	46533467	46533381	46533467	46531787	46531931	1720	141143137120	141165	148135127133	5869	66	50	0.318665	1	0.884,0.908,0.945,0.948	0.957,0.927,0.941,0.918	-0.014	chr8:46531931-46533366(+)	chr8:46531931-46533382(+)
ENSMUSG00000026767	Mindy3	chr2	-	12403997	12404168	12403997	12404166	12405859	12405920	1724	34383426	2100	50484143	300	52	50	1	1	0.942,0.973,1.0,1.0	1.0,0.939,1.0,1.0	-0.006	chr2:12404168-12405860(-)	chr2:12404166-12405860(-)
ENSMUSG00000026773	Pfkfb3	chr2	-	11486218	11486391	11486218	11486343	11488725	11488782	1725	314	108787768	5735	61858171	98	50	0.00670272	0.115702	0.0,0.019,0.007,0.029	0.04,0.04,0.019,0.035	-0.02	chr2:11486391-11488726(-)	chr2:11486343-11488726(-)
ENSMUSG00000041355	Ssr2	chr3	+	88583736	88583885	88583799	88583885	88580973	88581038	1729	583527547483	3146	578526494538	6211	100	50	0.835228	1	0.99,0.996,0.986,0.976	0.98,0.992,0.996,0.996	-0.004	chr3:88581038-88583737(+)	chr3:88581038-88583800(+)
ENSMUSG00000021156	Zmynd11	chr13	-	9695128	9695184	9695128	9695181	9695738	9695826	1732	45608056	1142	48725468	211	53	50	0.27136	1	0.977,0.983,0.95,0.964	1.0,0.971,0.981,0.985	-0.016	chr13:9695184-9695739(-)	chr13:9695181-9695739(-)
ENSMUSG00000050708	Ftl1	chr7	-	45458534	45458681	45458534	45458660	45459083	45459230	1733	58545052	3022307029712605	71536059	3457324027612716	71	50	0.501691	1	0.013,0.012,0.012,0.014	0.014,0.011,0.015,0.015	-0.001	chr7:45458681-45459084(-)	chr7:45458660-45459084(-)
ENSMUSG00000043467	Zbtb37	chr1	-	161031804	161032764	161031804	161032761	161034087	161034284	1734	200	1312	3021	1102	53	50	0.00059905	0.0204214	0.0,0.386,0.0,0.0	0.739,0.0,1.0,0.321	-0.418	chr1:161032764-161034088(-)	chr1:161032761-161034088(-)
ENSMUSG00000033669	Zfp7	chr15	+	76881111	76881238	76881114	76881238	76880738	76880782	1736	413134	0	91057	10	53	50	1	1	1.0,1.0,1.0,1.0	1.0,1.0,0.825,1.0	0.044	chr15:76880782-76881112(+)	chr15:76880782-76881115(+)
ENSMUSG00000028795	Ccdc28b	chr4	-	129620682	129620876	129620682	129620853	129620983	129621150	1737	134148149114	6263	136118122102	4316	73	50	0.76519	1	0.939,0.981,0.944,0.963	0.959,0.964,0.988,0.921	-0.001	chr4:129620876-129620984(-)	chr4:129620853-129620984(-)
ENSMUSG00000008668	Rps18	chr17	-	33952220	33952312	33952220	33952293	33952402	33952591	1738		21133415		19251815	69	50	1	1	0.998,0.999,0.997,0.998	0.998,0.998,0.998,0.998	0	chr17:33952312-33952403(-)	chr17:33952293-33952403(-)
ENSMUSG00000028149	Rap1gds1	chr3	-	138955321	138955461	138955321	138955458	138956193	138956319	1741	56487751	1671410	52474458	11101310	53	50	0.782166	1	0.768,0.866,0.838,0.828	0.817,0.816,0.762,0.845	0.015	chr3:138955461-138956194(-)	chr3:138955458-138956194(-)
ENSMUSG00000000154	Slc22a18	chr7	+	143492805	143492942	143492841	143492942	143491745	143491853	1743	101	6956	10	2473	86	50	1	1	0.0,0.061,0.0,0.088	0.0,0.0,0.077,0.0	0.018	chr7:143491853-143492806(+)	chr7:143491853-143492842(+)
ENSMUSG00000028107	Tars2	chr3	-	95742073	95742223	95742073	95742146	95742315	95742417	1745	108134	116111175100	2423	10713998127	100	50	0.000329479	0.0127689	0.041,0.035,0.036,0.02	0.009,0.014,0.01,0.012	0.022	chr3:95742223-95742316(-)	chr3:95742146-95742316(-)
ENSMUSG00000028107	Tars2	chr3	-	95748486	95748633	95748486	95748554	95750338	95750417	1746	227203298233	2701	186215187217	3324	100	50	0.403182	1	0.983,0.935,1.0,0.991	0.969,0.973,0.979,0.964	0.006	chr3:95748633-95750339(-)	chr3:95748554-95750339(-)
ENSMUSG00000028107	Tars2	chr3	-	95750837	95751027	95750837	95750984	95751505	95751630	1747	9299	1138412188	51496	751127892	93	50	0.294008	1	0.041,0.013,0.038,0.052	0.035,0.063,0.058,0.034	-0.012	chr3:95751027-95751506(-)	chr3:95750984-95751506(-)
ENSMUSG00000022214	Dcaf11	chr14	+	55562891	55563019	55562946	55563019	55561066	55561442	1749	198218214223	1000	190203196183	10	100	50	1	1	0.99,1.0,1.0,1.0	1.0,1.0,0.99,1.0	0	chr14:55561442-55562892(+)	chr14:55561442-55562947(+)
ENSMUSG00000027589	Pcmtd2	chr2	+	181851581	181851709	181851585	181851709	181846467	181846639	1751	322	24484133	6442	32243127	54	50	0.00623462	0.109051	0.0,0.055,0.043,0.053	0.148,0.134,0.107,0.064	-0.076	chr2:181846639-181851582(+)	chr2:181846639-181851586(+)
ENSMUSG00000055884	Fancm	chr12	+	65101519	65101712	65101560	65101712	65099247	65099452	1759	13555	10131224	3762	123167	91	50	0.934599	1	0.417,0.174,0.186,0.103	0.121,0.562,0.171,0.136	-0.028	chr12:65099452-65101520(+)	chr12:65099452-65101561(+)
ENSMUSG00000043019	Edem3	chr1	+	151805846	151805946	151805849	151805946	151804664	151804819	1761	3103	25264428	6145	40352134	53	50	0.0336886	0.338857	0.102,0.035,0.0,0.092	0.124,0.026,0.152,0.122	-0.049	chr1:151804819-151805847(+)	chr1:151804819-151805850(+)
ENSMUSG00000016494	Cd34	chr1	+	194949304	194949564	194949381	194949564	194947838	194948006	1763	733746964795	710713	918881884882	76714	100	50	0.478707	1	0.981,0.974,0.986,0.968	0.985,0.987,0.984,0.969	-0.004	chr1:194948006-194949305(+)	chr1:194948006-194949382(+)
ENSMUSG00000016494	Cd34	chr1	+	194959779	194961279	194959935	194961279	194959065	194959230	1764	357271376358	235202305261	488441425446	270207218263	100	50	0.000358989	0.0137775	0.432,0.401,0.381,0.407	0.475,0.516,0.494,0.459	-0.081	chr1:194959230-194959780(+)	chr1:194959230-194959936(+)
ENSMUSG00000069844	Sco1	chr11	+	67055715	67055928	67055730	67055928	67053774	67053865	1767	110	23322729	300	28261812	65	50	1	1	0.0,0.023,0.028,0.0	0.0,0.082,0.0,0.0	-0.008	chr11:67053865-67055716(+)	chr11:67053865-67055731(+)
ENSMUSG00000073460	Pnldc1	chr17	-	12894359	12894611	12894359	12894415	12895511	12895597	1770	0	32	300	110	100	50	1	1	NA,NA,0.0,0.0	NA,0.6,0.0,NA	-0.3	chr17:12894611-12895512(-)	chr17:12894415-12895512(-)
ENSMUSG00000037474	Dtl	chr1	-	191568290	191568411	191568290	191568404	191568494	191568556	1772	11494112110	6451	871127287	1175	57	50	0.7986	1	0.943,0.954,0.952,0.99	0.987,0.99,0.9,0.939	0.006	chr1:191568411-191568495(-)	chr1:191568404-191568495(-)
ENSMUSG00000017652	Cd40	chr2	+	165062211	165062364	165062285	165062364	165055626	165055758	1774	1200	0	0	1010	100	50	1	1	1.0,1.0,NA,NA	0.0,NA,0.0,NA	1	chr2:165055758-165062212(+)	chr2:165055758-165062286(+)
ENSMUSG00000027751	Supt20	chr3	+	54701486	54701616	54701489	54701616	54698592	54698659	1777	52404744	58535243	25403538	39434647	53	50	0.462915	1	0.458,0.416,0.46,0.491	0.377,0.467,0.418,0.433	0.033	chr3:54698659-54701487(+)	chr3:54698659-54701490(+)
ENSMUSG00000027751	Supt20	chr3	+	54715153	54715256	54715156	54715256	54714687	54714796	1778	1068410691	11895	87988298	3955	53	50	0.185845	0.890477	0.901,0.908,0.917,0.945	0.965,0.911,0.939,0.949	-0.023	chr3:54714796-54715154(+)	chr3:54714796-54715157(+)
ENSMUSG00000027751	Supt20	chr3	+	54716637	54717645	54717575	54717645	54715533	54715689	1779	152114120105	37313638	11314411691	35334537	100	50	0.489873	1	0.673,0.648,0.625,0.58	0.617,0.686,0.563,0.552	0.027	chr3:54715689-54716638(+)	chr3:54715689-54717576(+)
ENSMUSG00000027751	Supt20	chr3	+	54722520	54722640	54722556	54722640	54720405	54720461	1780	64645847	36452628	81918657	1419169	86	50	1.18603e-09	3.60644e-07	0.508,0.453,0.565,0.494	0.771,0.736,0.758,0.786	-0.258	chr3:54720461-54722521(+)	chr3:54720461-54722557(+)
ENSMUSG00000015291	Gdi1	chrX	+	74310389	74310534	74310479	74310534	74309962	74310134	1782	148141110121	4010	108146120117	3634	100	50	0.00144273	0.0398819	0.949,1.0,0.982,1.0	0.947,0.924,0.952,0.936	0.043	chrX:74310134-74310390(+)	chrX:74310134-74310480(+)
ENSMUSG00000017715	Pgs1	chr11	+	118014573	118014722	118014646	118014722	118005369	118005891	1784	1079399106	12111314	8411391106	188147	100	50	0.93594	1	0.817,0.809,0.792,0.791	0.7,0.876,0.765,0.883	-0.004	chr11:118005891-118014574(+)	chr11:118005891-118014647(+)
ENSMUSG00000047412	Zbtb44	chr9	+	31064178	31064342	31064232	31064342	31062040	31062125	1785	53385045	99411	60755949	6333	100	50	0.000894132	0.028276	0.746,0.679,0.862,0.672	0.833,0.926,0.908,0.891	-0.15	chr9:31062125-31064179(+)	chr9:31062125-31064233(+)
ENSMUSG00000028184	Adgrl2	chr3	-	148820972	148821054	148820972	148821025	148822954	148823051	1791	5246	2412	2210	113	79	50	0.253793	1	0.613,0.24,0.717,0.655	1.0,0.559,0.388,0.0	0.069	chr3:148821054-148822955(-)	chr3:148821025-148822955(-)
ENSMUSG00000028184	Adgrl2	chr3	-	148852566	148852860	148852566	148852662	148858732	148859533	1793	20223539	1040	38323937	0	100	50	0.529173	1	0.909,1.0,0.814,1.0	1.0,1.0,1.0,1.0	-0.069	chr3:148852860-148858733(-)	chr3:148852662-148858733(-)
ENSMUSG00000026339	Ccdc93	chr1	+	121462232	121462283	121462235	121462283	121461886	121461979	1796	25232534	6300	21332522	2141	53	50	0.612489	1	0.797,0.879,1.0,1.0	0.908,0.969,0.855,0.954	-0.002	chr1:121461979-121462233(+)	chr1:121461979-121462236(+)
ENSMUSG00000020893	Per1	chr11	+	69101674	69101876	69101734	69101876	69101450	69101572	1797	40384127	100	26262316	10	100	50	1	1	1.0,0.95,1.0,1.0	1.0,1.0,0.92,1.0	0.008	chr11:69101572-69101675(+)	chr11:69101572-69101735(+)
ENSMUSG00000037816	Fbxw17	chr13	+	50432170	50432346	50432175	50432346	50431539	50431750	1799	30202318	4304	10768	4142	55	50	0.0589263	0.468285	0.872,0.858,1.0,0.804	0.694,0.864,0.577,0.784	0.154	chr13:50431750-50432171(+)	chr13:50431750-50432176(+)
ENSMUSG00000040734	Ppp1r13l	chr7	+	19368541	19368622	19368545	19368622	19361026	19361316	1802	27109	212	5322	3000	54	50	0.389035	1	1.0,0.764,0.903,0.806	0.607,1.0,1.0,1.0	-0.034	chr7:19361316-19368542(+)	chr7:19361316-19368546(+)
ENSMUSG00000052760	A630001G21Rik	chr1	-	85723097	85723387	85723097	85723181	85725120	85725289	1804	50613632	90568460	52504035	31433943	100	50	0.00272901	0.0609479	0.217,0.353,0.176,0.211	0.456,0.368,0.339,0.289	-0.124	chr1:85723387-85725121(-)	chr1:85723181-85725121(-)
ENSMUSG00000052760	A630001G21Rik	chr1	-	85726458	85726615	85726458	85726502	85736471	85736581	1805	13611011384	91695	96687976	4364	100	50	0.0538385	0.448995	0.883,0.775,0.863,0.894	0.923,0.919,0.868,0.905	-0.05	chr1:85726615-85736472(-)	chr1:85726502-85736472(-)
ENSMUSG00000042207	Kdm5b	chr1	+	134593328	134593463	134593337	134593463	134588776	134588947	1806	24244023	10	24311731	0	59	50	1	1	1.0,1.0,0.971,1.0	1.0,1.0,1.0,1.0	-0.007	chr1:134588947-134593329(+)	chr1:134588947-134593338(+)
ENSMUSG00000004018	Fancl	chr11	+	26470806	26470948	26470876	26470948	26469651	26469768	1808	3002	17353525	3254	34373938	100	50	0.0238806	0.267422	0.081,0.0,0.0,0.038	0.042,0.026,0.06,0.05	-0.015	chr11:26469768-26470807(+)	chr11:26469768-26470877(+)
ENSMUSG00000061286	Exosc5	chr7	+	25664247	25664448	25664326	25664448	25663136	25663250	1809	72785953	488572439448	55465261	413453383417	100	50	0.7048	1	0.069,0.064,0.063,0.056	0.062,0.048,0.064,0.068	0.003	chr7:25663250-25664248(+)	chr7:25663250-25664327(+)
ENSMUSG00000022957	Itsn1	chr16	+	91801526	91801706	91801637	91801706	91793606	91793767	1810	21162610	100	1512915	0	100	50	1	1	1.0,0.889,1.0,1.0	1.0,1.0,1.0,1.0	-0.028	chr16:91793767-91801527(+)	chr16:91793767-91801638(+)
ENSMUSG00000028249	Sdcbp	chr4	+	6385025	6385187	6385028	6385187	6380989	6381099	1812	359356426324	797611298	322349352327	87969499	53	50	0.298915	1	0.811,0.815,0.782,0.757	0.777,0.774,0.779,0.757	0.019	chr4:6381099-6385026(+)	chr4:6381099-6385029(+)
ENSMUSG00000031389	Arhgap4	chrX	-	73896813	73896997	73896813	73896992	73897080	73897154	1814	1211108264	531	941098592	2022	55	50	0.374146	1	1.0,0.952,0.961,0.983	0.977,1.0,0.975,0.977	-0.008	chrX:73896997-73897081(-)	chrX:73896992-73897081(-)
ENSMUSG00000031389	Arhgap4	chrX	-	73897968	73898046	73897968	73898013	73898131	73898192	1815	182183108115	1100	146149130114	0	83	50	1	1	0.991,0.991,1.0,1.0	1.0,1.0,1.0,1.0	-0.004	chrX:73898046-73898132(-)	chrX:73898013-73898132(-)
ENSMUSG00000031389	Arhgap4	chrX	-	73900277	73900469	73900277	73900385	73900634	73900736	1817	173203142105	100	151160120135	0	100	50	1	1	1.0,0.99,1.0,1.0	1.0,1.0,1.0,1.0	-0.002	chrX:73900469-73900635(-)	chrX:73900385-73900635(-)
ENSMUSG00000031389	Arhgap4	chrX	-	73905650	73905893	73905650	73905863	73906156	73906219	1818	2433	29322741	6430	40373931	80	50	0.823562	1	0.041,0.072,0.065,0.044	0.086,0.063,0.046,0.0	0.007	chrX:73905893-73906157(-)	chrX:73905863-73906157(-)
ENSMUSG00000056476	Med12l	chr3	+	59262862	59263286	59263124	59263286	59262209	59262345	1820	100	2123	10	812	100	50	1	1	0.0,0.333,0.0,0.0	NA,0.0,0.333,0.0	-0.028	chr3:59262345-59262863(+)	chr3:59262345-59263125(+)
ENSMUSG00000034022	Cpsf1	chr15	-	76596219	76596571	76596219	76596349	76596650	76596698	1821	179151193166	1100	187177154160	212	100	50	1	1	0.989,0.987,1.0,1.0	1.0,0.978,0.987,0.976	0.009	chr15:76596571-76596651(-)	chr15:76596349-76596651(-)
ENSMUSG00000034022	Cpsf1	chr15	-	76602508	76602648	76602508	76602587	76602790	76602937	1823	205214207166	8766	224251213208	4154	100	50	0.0106913	0.155559	0.928,0.939,0.945,0.933	0.966,0.992,0.955,0.963	-0.033	chr15:76602648-76602791(-)	chr15:76602587-76602791(-)
ENSMUSG00000034022	Cpsf1	chr15	-	76603511	76603645	76603511	76603569	76603723	76603751	1824	219172173165	8533	224225171187	4134	100	50	0.0985843	0.6222	0.932,0.945,0.966,0.965	0.966,0.991,0.966,0.959	-0.019	chr15:76603645-76603724(-)	chr15:76603569-76603724(-)
ENSMUSG00000026150	Mff	chr1	+	82735415	82735507	82735418	82735507	82731112	82731282	1825	1079912180	123137182134	901007386	135141145121	53	50	0.426964	1	0.451,0.405,0.385,0.36	0.386,0.401,0.322,0.401	0.023	chr1:82731282-82735416(+)	chr1:82731282-82735419(+)
ENSMUSG00000066026	Dhrs3	chr4	+	144919229	144919504	144919384	144919504	144918650	144918794	1830	112175	43534348	139145	37312723	100	50	0.154863	0.804434	0.113,0.165,0.075,0.05	0.149,0.127,0.206,0.098	-0.044	chr4:144918794-144919230(+)	chr4:144918794-144919385(+)
ENSMUSG00000039205	Ciz1	chr2	+	32370031	32370125	32370046	32370125	32367302	32367532	1833	13012110692	17261711	949411881	14171010	65	50	0.362415	1	0.855,0.782,0.827,0.865	0.838,0.81,0.901,0.862	-0.021	chr2:32367532-32370032(+)	chr2:32367532-32370047(+)
ENSMUSG00000030741	Spns1	chr7	-	126373921	126374073	126373921	126373973	126375066	126375203	1834	54707465	2322	72827383	1210	100	50	1	1	0.931,0.921,0.949,0.942	0.973,0.953,0.973,1.0	-0.039	chr7:126374073-126375067(-)	chr7:126373973-126375067(-)
ENSMUSG00000026197	Zfand2b	chr1	+	75168830	75168906	75168833	75168906	75168645	75168707	1835	2640209	717115	32281220	9596	53	50	0.396529	1	0.778,0.689,0.632,0.629	0.77,0.841,0.557,0.759	-0.05	chr1:75168707-75168831(+)	chr1:75168707-75168834(+)
ENSMUSG00000021972	Hmbox1	chr14	-	64825600	64825695	64825600	64825692	64826771	64826867	1836	25162824	10141411	23253220	149119	53	50	0.456769	1	0.702,0.519,0.654,0.673	0.608,0.724,0.733,0.677	-0.048	chr14:64825695-64826772(-)	chr14:64825692-64826772(-)
ENSMUSG00000057177	Gsk3a	chr7	-	25228257	25228930	25228257	25228918	25229464	25229572	1837	376359416374	301	361334382350	3000	62	50	1	1	1.0,0.99,1.0,0.997	0.99,1.0,1.0,1.0	-0.001	chr7:25228930-25229465(-)	chr7:25228918-25229465(-)
ENSMUSG00000005506	Celf1	chr2	+	91006619	91006695	91006631	91006695	91004700	91004862	1845	74688793	20203516	859910177	14191815	62	50	0.0320031	0.326052	0.749,0.733,0.667,0.824	0.83,0.808,0.819,0.805	-0.072	chr2:91004862-91006620(+)	chr2:91004862-91006632(+)
ENSMUSG00000005506	Celf1	chr2	+	91009201	91009315	91009204	91009315	91008171	91008300	1846	21223626	64547568	18382426	65596042	53	50	0.458896	1	0.236,0.278,0.312,0.265	0.207,0.378,0.274,0.369	-0.034	chr2:91008300-91009202(+)	chr2:91008300-91009205(+)
ENSMUSG00000005506	Celf1	chr2	+	91013490	91019490	91016565	91019490	91013237	91013402	1847	833911276	26184321	51677568	16281927	100	50	0.949642	1	0.615,0.52,0.566,0.644	0.614,0.545,0.664,0.557	-0.009	chr2:91013402-91013491(+)	chr2:91013402-91016566(+)
ENSMUSG00000041939	Mvk	chr5	+	114450240	114450421	114450276	114450421	114446158	114446306	1848	26141613	34293136	16191810	27273625	86	50	0.904954	1	0.308,0.219,0.231,0.174	0.256,0.29,0.225,0.189	-0.007	chr5:114446306-114450241(+)	chr5:114446306-114450277(+)
ENSMUSG00000029510	Gpc2	chr5	-	138275928	138276369	138275928	138276338	138276583	138277487	1852	1102	1015135	10	10995	81	50	1	1	0.058,0.04,0.0,0.198	0.0,0.0,0.064,0.0	0.058	chr5:138276369-138276584(-)	chr5:138276338-138276584(-)
ENSMUSG00000029510	Gpc2	chr5	-	138278214	138278537	138278214	138278454	138278838	138278997	1853	86611	8555	1110122	31053	100	50	0.652386	1	0.333,0.375,0.375,0.524	0.647,0.333,0.545,0.25	-0.042	chr5:138278537-138278839(-)	chr5:138278454-138278839(-)
ENSMUSG00000037894	H2afz	chr3	+	137865519	137865633	137865557	137865633	137865132	137865210	1859	4876512750944443	2111	4970518643684098	404	88	50	1	1	0.999,1.0,1.0,1.0	1.0,0.999,1.0,0.998	0.001	chr3:137865210-137865520(+)	chr3:137865210-137865558(+)
ENSMUSG00000037894	H2afz	chr3	+	137866010	137866140	137866079	137866140	137865519	137865633	1860	3669372942473614	26212726	3772382132513389	19291420	100	50	0.433774	1	0.986,0.989,0.987,0.986	0.99,0.985,0.991,0.988	-0.001	chr3:137865633-137866011(+)	chr3:137865633-137866080(+)
ENSMUSG00000062590	Armc9	chr1	+	86213049	86213105	86213052	86213105	86207952	86208043	1864	719216	1000	817613	4221	53	50	0.000148171	0.00668289	0.868,1.0,1.0,1.0	0.654,0.889,0.739,0.925	0.165	chr1:86208043-86213050(+)	chr1:86208043-86213053(+)
ENSMUSG00000062590	Armc9	chr1	+	86262038	86262165	86262041	86262165	86257225	86257362	1865	100	0	11	220	53	50	1	1	NA,1.0,NA,NA	NA,0.0,0.321,1.0	0.56	chr1:86257362-86262039(+)	chr1:86257362-86262042(+)
ENSMUSG00000070000	Fcho1	chr8	-	71721251	71721304	71721251	71721300	71721818	71721859	1868	132134109123	20262011	115129118131	1620914	54	50	0.180701	0.881492	0.859,0.827,0.835,0.912	0.869,0.857,0.924,0.897	-0.028	chr8:71721304-71721819(-)	chr8:71721300-71721819(-)
ENSMUSG00000053768	Chchd3	chr6	-	32968200	32968318	32968200	32968266	33008482	33008564	1871	498517710579	10	532636435498	0	100	50	1	1	1.0,1.0,0.997,1.0	1.0,1.0,1.0,1.0	-0.001	chr6:32968318-33008483(-)	chr6:32968266-33008483(-)
ENSMUSG00000034544	Rsrc1	chr3	+	66996464	66996590	66996470	66996590	66994516	66994712	1875	43606937	101	45634658	101	56	50	1	1	1.0,0.982,1.0,0.971	1.0,0.983,1.0,0.981	-0.003	chr3:66994712-66996465(+)	chr3:66994712-66996471(+)
ENSMUSG00000036591	Arhgap21	chr2	-	20860970	20861110	20860970	20861107	20861185	20861250	1877	36137	29222926	3985	23332128	53	50	0.689584	1	0.089,0.205,0.297,0.203	0.11,0.205,0.264,0.144	0.018	chr2:20861110-20861186(-)	chr2:20861107-20861186(-)
ENSMUSG00000028282	Casp8ap2	chr4	+	32631805	32631880	32631815	32631880	32631065	32631166	1879	29262931	0	32303032	100	60	50	1	1	1.0,1.0,1.0,1.0	1.0,0.962,1.0,1.0	0.01	chr4:32631166-32631806(+)	chr4:32631166-32631816(+)
ENSMUSG00000033147	Slc22a15	chr3	-	101880008	101880224	101880008	101880187	101883459	101883589	1880	11587	2312	9874	5413	87	50	0.226381	0.983484	0.76,0.489,0.821,0.668	0.508,0.535,0.801,0.434	0.115	chr3:101880224-101883460(-)	chr3:101880187-101883460(-)
ENSMUSG00000021711	Trappc13	chr13	-	104144403	104144554	104144403	104144551	104147243	104147344	1882	30202629	28395035	16333223	35233222	53	50	0.295994	1	0.503,0.326,0.329,0.439	0.301,0.575,0.485,0.497	-0.065	chr13:104144554-104147244(-)	chr13:104144551-104147244(-)
ENSMUSG00000034586	Hid1	chr11	-	115359694	115359811	115359694	115359808	115360321	115360492	1884	21	10	100	0	53	50	1	1	NA,NA,0.654,1.0	NA,1.0,NA,NA	-0.173	chr11:115359811-115360322(-)	chr11:115359808-115360322(-)
ENSMUSG00000036989	Trim3	chr7	-	105619058	105619228	105619058	105619210	105619382	105619614	1888	2001	2265	1120	4022	68	50	0.450342	1	0.424,0.0,0.0,0.128	0.155,1.0,0.424,0.0	-0.257	chr7:105619228-105619383(-)	chr7:105619210-105619383(-)
ENSMUSG00000034653	Ythdc2	chr18	+	44877617	44877795	44877643	44877795	44872840	44873133	1889	20141511	1010	19132211	1010	76	50	1	1	0.929,1.0,0.908,1.0	0.926,1.0,0.935,1.0	-0.006	chr18:44873133-44877618(+)	chr18:44873133-44877644(+)
ENSMUSG00000020697	Lig3	chr11	+	82787627	82787828	82787630	82787828	82785314	82785458	1896	49484864	21142218	36493645	18202813	53	50	0.244492	1	0.688,0.764,0.673,0.77	0.654,0.698,0.548,0.766	0.057	chr11:82785458-82787628(+)	chr11:82785458-82787631(+)
ENSMUSG00000025270	Alas2	chrX	+	150552958	150553081	150553003	150553081	150552148	150552344	1897	22951	200	6665	10	95	50	1	1	1.0,0.703,1.0,1.0	1.0,1.0,0.759,1.0	-0.014	chrX:150552344-150552959(+)	chrX:150552344-150553004(+)
ENSMUSG00000062647	Rpl7a	chr2	+	26912292	26912445	26912365	26912445	26912018	26912159	1899	146181121115	6207683368995841	112111126102	5765583352885216	100	50	0.524095	1	0.012,0.013,0.009,0.01	0.01,0.009,0.012,0.01	0.001	chr2:26912159-26912293(+)	chr2:26912159-26912366(+)
ENSMUSG00000000441	Raf1	chr6	-	115620208	115620347	115620208	115620327	115621815	115621862	1902	155710	10311310089	66103	889392104	70	50	0.203838	0.934383	0.094,0.031,0.048,0.074	0.046,0.044,0.072,0.02	0.016	chr6:115620347-115621816(-)	chr6:115620327-115621816(-)
ENSMUSG00000063455	D630045J12Rik	chr6	-	38136833	38136994	38136833	38136991	38139422	38139469	1904	1023	10	4010	101	53	50	1	1	1.0,NA,0.654,1.0	1.0,0.0,1.0,0.0	0.385	chr6:38136994-38139423(-)	chr6:38136991-38139423(-)
ENSMUSG00000014850	Msh3	chr13	-	92235573	92235731	92235573	92235728	92249826	92249938	1905	25262819	91286	16182313	91087	53	50	0.305635	1	0.724,0.671,0.768,0.749	0.626,0.629,0.731,0.637	0.072	chr13:92235731-92249827(-)	chr13:92235728-92249827(-)
ENSMUSG00000014850	Msh3	chr13	-	92351230	92351451	92351230	92351360	92353224	92353342	1906	31503635	5923	39395133	4011	100	50	0.00116634	0.034054	0.756,0.735,0.9,0.854	0.83,1.0,0.962,0.943	-0.122	chr13:92351451-92353225(-)	chr13:92351360-92353225(-)
ENSMUSG00000023206	Il15ra	chr2	+	11723412	11723610	11723511	11723610	11720012	11720105	1907	55384234	1000	44455547	1021	100	50	0.825311	1	0.965,1.0,1.0,1.0	0.957,1.0,0.932,0.959	0.029	chr2:11720105-11723413(+)	chr2:11720105-11723512(+)
ENSMUSG00000026466	Tor1aip1	chr1	-	156018217	156018530	156018217	156018259	156022299	156022380	1908	1421	151173138166	3432	143139136106	100	50	1	1	0.003,0.011,0.007,0.003	0.01,0.014,0.011,0.009	-0.005	chr1:156018530-156022300(-)	chr1:156018259-156022300(-)
ENSMUSG00000037275	Gemin5	chr11	-	58122281	58122378	58122281	58122375	58124931	58125418	1918	44396655	28202630	38463438	21221922	53	50	0.8013	1	0.597,0.648,0.705,0.634	0.631,0.664,0.628,0.62	0.01	chr11:58122378-58124932(-)	chr11:58122375-58124932(-)
ENSMUSG00000037275	Gemin5	chr11	-	58137667	58137766	58137667	58137763	58139018	58139141	1920	43414937	20122618	38424939	8101417	53	50	0.0628848	0.485862	0.67,0.763,0.64,0.66	0.818,0.798,0.768,0.684	-0.084	chr11:58137766-58139019(-)	chr11:58137763-58139019(-)
ENSMUSG00000047342	Zfp286	chr11	-	62784878	62785009	62784878	62784993	62787958	62788044	1922	1010	5473	1	8622	66	50	1	1	0.132,0.0,0.098,0.0	0.0,0.0,0.0,0.275	-0.011	chr11:62785009-62787959(-)	chr11:62784993-62787959(-)
ENSMUSG00000004221	Ikbkg	chrX	+	74437163	74437282	74437166	74437282	74433802	74434014	1924	58556752	1210146	51595143	8151012	53	50	0.417928	1	0.82,0.838,0.819,0.891	0.857,0.788,0.828,0.772	0.031	chrX:74434014-74437164(+)	chrX:74434014-74437167(+)
ENSMUSG00000025967	Eef1b2	chr1	+	63178422	63178565	63178438	63178565	63177722	63177876	1925	273257271251	4224487650864164	260265216215	3859427036833957	66	50	0.567098	1	0.047,0.038,0.039,0.044	0.049,0.045,0.043,0.04	-0.002	chr1:63177876-63178423(+)	chr1:63177876-63178439(+)
ENSMUSG00000025967	Eef1b2	chr1	+	63178022	63178565	63178438	63178565	63177753	63177876	1926	300278282263	4224487650864164	271285233234	3859427036833957	100	50	0.547196	1	0.034,0.028,0.027,0.031	0.034,0.032,0.031,0.029	-0.002	chr1:63177876-63178023(+)	chr1:63177876-63178439(+)
ENSMUSG00000031112	Stk26	chrX	+	50884577	50885697	50885588	50885697	50879488	50879545	1928	51946	262196232216	4763	234217185190	100	50	0.0973151	0.616485	0.009,0.046,0.009,0.014	0.008,0.016,0.016,0.008	0.007	chrX:50879545-50884578(+)	chrX:50879545-50885589(+)
ENSMUSG00000027378	Nphp1	chr2	-	127766023	127766121	127766023	127766118	127768170	127768258	1931	84818	16121111	81886	918127	53	50	0.564078	1	0.321,0.239,0.407,0.607	0.456,0.485,0.386,0.447	-0.05	chr2:127766121-127768171(-)	chr2:127766118-127768171(-)
ENSMUSG00000016181	Diexf	chr1	-	193113756	193114002	193113756	193113980	193114604	193114717	1932	50236151	9101612	30354043	58514	72	50	0.470976	1	0.794,0.615,0.726,0.747	0.806,0.752,0.847,0.681	-0.051	chr1:193114002-193114605(-)	chr1:193113980-193114605(-)
ENSMUSG00000004393	Ddx56	chr11	-	6266810	6266971	6266810	6266917	6267417	6267579	1938	315279315302	5667	285317245254	1734	100	50	0.187778	0.894323	0.969,0.959,0.963,0.956	0.993,0.958,0.976,0.969	-0.012	chr11:6266971-6267418(-)	chr11:6266917-6267418(-)
ENSMUSG00000026626	Ppp2r5a	chr1	-	191358924	191359079	191358924	191359055	191362248	191362341	1940	10131011	159167181136	813811	192168127137	74	50	0.77228	1	0.041,0.05,0.036,0.052	0.027,0.05,0.041,0.051	0.003	chr1:191359079-191362249(-)	chr1:191359055-191362249(-)
ENSMUSG00000030142	Clec4e	chr6	-	123286207	123286518	123286207	123286359	123288893	123288989	1943	31364245	20	28203133	211	100	50	0.905835	1	1.0,1.0,0.913,1.0	1.0,0.833,0.939,0.943	0.05	chr6:123286518-123288894(-)	chr6:123286359-123288894(-)
ENSMUSG00000046432	Bex3	chrX	+	136271262	136271978	136271267	136271978	136270809	136270882	1944	175239263210	79137	238230216189	7366	55	50	0.0664032	0.503823	0.958,0.96,0.948,0.965	0.969,0.986,0.97,0.966	-0.015	chrX:136270882-136271263(+)	chrX:136270882-136271268(+)
ENSMUSG00000026270	Capn10	chr1	+	92943678	92943941	92943830	92943941	92943299	92943466	1945	34514137	110	27464553	1010	100	50	1	1	1.0,0.962,0.953,1.0	0.931,1.0,0.957,1.0	0.007	chr1:92943466-92943679(+)	chr1:92943466-92943831(+)
ENSMUSG00000021178	Psmc1	chr12	+	100115419	100115605	100115468	100115605	100114837	100114962	1946	857890905891	202	830708727685	14	99	50	1	1	1.0,0.996,1.0,0.996	1.0,1.0,0.997,0.989	0.002	chr12:100114962-100115420(+)	chr12:100114962-100115469(+)
ENSMUSG00000001280	Sp1	chr15	+	102408215	102409719	102409157	102409719	102407771	102407932	1947	1127812198	120	71799469	3000	100	50	1	1	1.0,0.975,0.968,1.0	0.922,1.0,1.0,1.0	0.005	chr15:102407932-102408216(+)	chr15:102407932-102409158(+)
ENSMUSG00000043923	Ccdc84	chr9	-	44412916	44413043	44412916	44413022	44413136	44413201	1948	3656	25242423	4745	22211419	71	50	0.544045	1	0.078,0.15,0.128,0.155	0.114,0.19,0.168,0.156	-0.029	chr9:44413043-44413137(-)	chr9:44413022-44413137(-)
ENSMUSG00000058267	Mrps14	chr1	+	160196920	160197104	160196945	160197104	160195214	160195311	1949	1202	505379607453	2001	442530432524	75	50	1	1	0.001,0.004,0.0,0.003	0.003,0.0,0.0,0.001	0.001	chr1:160195311-160196921(+)	chr1:160195311-160196946(+)
ENSMUSG00000033434	Gtpbp6	chr5	-	110106652	110106783	110106652	110106742	110106869	110106940	1950	53486133	130	42444436	21	91	50	1	1	1.0,0.963,0.918,1.0	1.0,1.0,0.924,0.952	0.001	chr5:110106783-110106870(-)	chr5:110106742-110106870(-)
ENSMUSG00000036155	Mgat5	chr1	+	127306633	127307016	127306636	127307016	127249789	127249839	1951	38333229	14111617	20202518	73710	53	50	0.243924	1	0.719,0.739,0.654,0.617	0.729,0.863,0.771,0.629	-0.066	chr1:127249839-127306634(+)	chr1:127249839-127306637(+)
ENSMUSG00000038000	Acd	chr8	-	105700003	105700160	105700003	105700048	105700281	105700358	1952	30372522	112958977	24332017	1401149992	100	50	0.0300458	0.31338	0.118,0.163,0.123,0.125	0.079,0.126,0.092,0.085	0.037	chr8:105700160-105700282(-)	chr8:105700048-105700282(-)
ENSMUSG00000028758	Kif17	chr4	+	138277795	138278248	138278071	138278248	138274966	138275156	1954	24361823	10	20202419	1101	100	50	1	1	1.0,1.0,0.9,1.0	0.909,0.909,1.0,0.905	0.044	chr4:138275156-138277796(+)	chr4:138275156-138278072(+)
ENSMUSG00000028758	Kif17	chr4	+	138289237	138289324	138289240	138289324	138287928	138288485	1956	87711	113511	6745	7577	53	50	0.459868	1	0.407,0.688,0.569,0.485	0.447,0.569,0.35,0.403	0.095	chr4:138288485-138289238(+)	chr4:138288485-138289241(+)
ENSMUSG00000038374	Rbm8a	chr3	+	96630476	96630554	96630479	96630554	96630301	96630361	1960	256239330250	260304319300	208260192215	257295286212	53	50	0.405347	1	0.482,0.426,0.494,0.44	0.433,0.454,0.388,0.489	0.02	chr3:96630361-96630477(+)	chr3:96630361-96630480(+)
ENSMUSG00000026201	Stk16	chr1	+	75213112	75213228	75213132	75213228	75212885	75213006	1962	39382416	263305333274	31342836	252243226212	70	50	0.0308987	0.318573	0.096,0.082,0.049,0.04	0.081,0.091,0.081,0.108	-0.024	chr1:75213006-75213113(+)	chr1:75213006-75213133(+)
ENSMUSG00000025949	Pikfyve	chr1	+	65192530	65192566	65192533	65192566	65192144	65192294	1963	112	1001	0	1010	53	50	1	1	0.0,1.0,1.0,0.654	0.0,NA,0.0,NA	0.663	chr1:65192294-65192531(+)	chr1:65192294-65192534(+)
ENSMUSG00000027478	Dnmt3b	chr2	+	153675725	153675813	153675728	153675813	153674857	153675044	1968	25203337	28282333	31242331	21231931	53	50	0.550409	1	0.457,0.403,0.575,0.514	0.582,0.496,0.533,0.485	-0.037	chr2:153675044-153675726(+)	chr2:153675044-153675729(+)
ENSMUSG00000034664	Itga2b	chr11	-	102456229	102456346	102456229	102456344	102456964	102457084	1970	11220917796	11	86149132112	100	52	50	1	1	1.0,1.0,0.994,0.989	1.0,0.993,1.0,1.0	-0.003	chr11:102456346-102456965(-)	chr11:102456344-102456965(-)
ENSMUSG00000047798	Cd300lf	chr11	-	115124247	115124377	115124247	115124356	115126110	115126452	1972	1100	101	2210	1000	71	50	1	1	1.0,0.413,NA,0.0	0.585,1.0,1.0,NA	-0.391	chr11:115124377-115126111(-)	chr11:115124356-115126111(-)
ENSMUSG00000063253	Scoc	chr8	-	83437552	83437636	83437552	83437633	83437984	83438056	1973	53606264	9567	53514843	6772	53	50	0.910921	1	0.847,0.919,0.907,0.896	0.893,0.873,0.866,0.953	-0.004	chr8:83437636-83437985(-)	chr8:83437633-83437985(-)
ENSMUSG00000026104	Stat1	chr1	+	52147882	52147999	52147900	52147999	52147293	52147377	1975	1410813	96568577	6151411	77909172	68	50	0.916545	1	0.097,0.116,0.065,0.11	0.054,0.109,0.102,0.101	0.006	chr1:52147377-52147883(+)	chr1:52147377-52147901(+)
ENSMUSG00000085795	Zfp703	chr8	+	26978234	26978395	26978261	26978395	26977324	26977611	1977	4444	100	3031	1001	77	50	1	1	1.0,0.722,1.0,1.0	0.661,NA,1.0,0.394	0.245	chr8:26977611-26978235(+)	chr8:26977611-26978262(+)
ENSMUSG00000027247	Arhgap1	chr2	+	91654045	91654207	91654072	91654207	91651763	91651823	1982	13132318	74656058	1581711	57555456	77	50	0.530699	1	0.102,0.115,0.199,0.168	0.146,0.086,0.17,0.113	0.017	chr2:91651823-91654046(+)	chr2:91651823-91654073(+)
ENSMUSG00000034903	Cobll1	chr2	-	65150978	65151167	65150978	65151164	65238362	65238626	1984	1020	0	100	10	53	50	1	1	1.0,NA,1.0,NA	NA,1.0,0.0,NA	0.5	chr2:65151167-65238363(-)	chr2:65151164-65238363(-)
ENSMUSG00000008035	Mid1ip1	chrX	+	10717983	10719690	10717986	10719690	10717389	10717704	1985	43284939	79777874	33393643	76996163	53	50	0.962934	1	0.339,0.255,0.372,0.332	0.291,0.271,0.358,0.392	-0.004	chrX:10717704-10717984(+)	chrX:10717704-10717987(+)
ENSMUSG00000034327	Kctd9	chr14	+	67729223	67729409	67729350	67729409	67728649	67728746	1986	1191013	17202617	3544	11532423	100	50	1.68886e-05	0.00119216	0.244,0.184,0.161,0.277	0.12,0.045,0.077,0.08	0.136	chr14:67728746-67729224(+)	chr14:67728746-67729351(+)
ENSMUSG00000032086	Bace1	chr9	+	45856087	45856225	45856162	45856225	45854626	45854843	1990	163145126112	4200	14192104108	1041	100	50	0.814029	1	0.953,0.973,1.0,1.0	0.986,1.0,0.929,0.982	0.007	chr9:45854843-45856088(+)	chr9:45854843-45856163(+)
ENSMUSG00000023118	Sympk	chr7	+	19047449	19047610	19047520	19047610	19046754	19046902	1992	507409430432	5434	425431411378	8316	100	50	0.582596	1	0.981,0.981,0.986,0.982	0.964,0.986,0.995,0.969	0.004	chr7:19046902-19047450(+)	chr7:19046902-19047521(+)
ENSMUSG00000037370	Enpp1	chr10	-	24651244	24651399	24651244	24651396	24652834	24652886	1994	1	4474	1011	2222	53	50	1	1	0.0,0.0,0.0,0.191	0.321,0.0,0.321,0.321	-0.193	chr10:24651399-24652835(-)	chr10:24651396-24652835(-)
ENSMUSG00000037370	Enpp1	chr10	-	24664554	24664627	24664554	24664601	24664910	24664976	1995	916139	1020	1191315	1	76	50	1	1	0.856,1.0,0.81,1.0	1.0,1.0,1.0,0.908	-0.06	chr10:24664627-24664911(-)	chr10:24664601-24664911(-)
ENSMUSG00000017664	Slc35c2	chr2	-	165280785	165280954	165280785	165280891	165281307	165281380	1996	471419425427	108102	495435362415	2622	100	50	0.00289748	0.0632804	0.959,0.963,0.955,0.991	0.992,0.973,0.989,0.99	-0.019	chr2:165280954-165281308(-)	chr2:165280891-165281308(-)
ENSMUSG00000017664	Slc35c2	chr2	-	165282782	165282933	165282782	165282862	165283248	165283600	1997	630469491458	2812	544486462477	3624	100	50	0.771035	1	0.994,0.967,0.996,0.991	0.989,0.976,0.991,0.984	0.002	chr2:165282933-165283249(-)	chr2:165282862-165283249(-)
ENSMUSG00000017664	Slc35c2	chr2	-	165283248	165283600	165283248	165283535	165287683	165287755	1999	179141140136	110	140102140129	101	100	50	1	1	1.0,0.986,0.986,1.0	1.0,0.981,1.0,0.985	0.002	chr2:165283600-165287684(-)	chr2:165283535-165287684(-)
ENSMUSG00000022387	Brd1	chr15	-	88700772	88701270	88700772	88700877	88707033	88707294	2000	126115111105	12331713	1121158979	26312719	100	50	0.0181022	0.224052	0.84,0.635,0.766,0.802	0.683,0.65,0.622,0.675	0.103	chr15:88701270-88707034(-)	chr15:88700877-88707034(-)
ENSMUSG00000035062	Zc4h2	chrX	-	95642163	95642358	95642163	95642326	95643307	95643480	2001	1002	12131314	0	891111	82	50	1	1	0.048,0.0,0.0,0.08	0.0,0.0,0.0,0.0	0.032	chrX:95642358-95643308(-)	chrX:95642326-95643308(-)
ENSMUSG00000061136	Prpf40a	chr2	-	53188447	53188540	53188447	53188527	53189968	53190100	2003	2110	3620	0	223	63	50	1	1	0.346,0.117,0.284,NA	NA,0.0,0.0,0.0	0.249	chr2:53188540-53189969(-)	chr2:53188527-53189969(-)
ENSMUSG00000038375	Trp53inp2	chr2	+	155385880	155386169	155386000	155386169	155385289	155385464	2005	4210	100	236	0	100	50	1	1	1.0,0.5,1.0,NA	NA,1.0,1.0,1.0	-0.167	chr2:155385464-155385881(+)	chr2:155385464-155386001(+)
ENSMUSG00000058835	Abi1	chr2	-	22953434	22953611	22953434	22953608	22957017	22957118	2007	57574837	54535447	40323525	47373428	53	50	0.749357	1	0.499,0.504,0.456,0.426	0.445,0.449,0.493,0.457	0.01	chr2:22953611-22957018(-)	chr2:22953608-22957018(-)
ENSMUSG00000031065	Cdk16	chrX	+	20693906	20694171	20694037	20694171	20693323	20693531	2008	1091412	120114150114	131897	1211069092	100	50	0.316619	1	0.04,0.038,0.045,0.05	0.051,0.078,0.048,0.037	-0.01	chrX:20693531-20693907(+)	chrX:20693531-20694038(+)
ENSMUSG00000022248	Rad1	chr15	+	10492764	10492863	10492787	10492863	10490255	10490514	2009	909513597	43211	571057159	313	73	50	0.026707	0.28924	0.939,0.956,0.979,0.858	1.0,0.96,0.98,0.931	-0.035	chr15:10490514-10492765(+)	chr15:10490514-10492788(+)
ENSMUSG00000028676	Srsf10	chr4	+	135863522	135863576	135863525	135863576	135863039	135863202	2021	164136205164	56655256	152187165124	37754767	53	50	0.84513	1	0.734,0.664,0.788,0.734	0.795,0.702,0.768,0.636	0.005	chr4:135863202-135863523(+)	chr4:135863202-135863526(+)
ENSMUSG00000074358	Ccdc61	chr7	-	18892038	18892199	18892038	18892099	18892273	18892352	2026	5867	37313526	3333	41203226	100	50	0.0279066	0.297344	0.063,0.114,0.079,0.119	0.035,0.07,0.045,0.055	0.042	chr7:18892199-18892274(-)	chr7:18892099-18892274(-)
ENSMUSG00000074358	Ccdc61	chr7	-	18899557	18899713	18899557	18899682	18900918	18901076	2027	52394027	2204	70403837	235	81	50	0.70755	1	0.941,0.923,1.0,0.806	1.0,0.925,0.887,0.82	0.009	chr7:18899713-18900919(-)	chr7:18899682-18900919(-)
ENSMUSG00000032855	Pkd1	chr17	+	24591014	24591217	24591174	24591217	24590818	24590937	2029	52415035	1111	27322632	1400	100	50	0.298462	1	0.963,0.953,0.962,0.946	0.931,0.8,1.0,1.0	0.023	chr17:24590937-24591015(+)	chr17:24590937-24591175(+)
ENSMUSG00000028049	Scamp3	chr3	+	89179091	89179223	89179094	89179223	89177989	89178067	2030	154153151146	173150221164	132111119126	129138148156	53	50	0.974653	1	0.456,0.49,0.392,0.456	0.491,0.431,0.431,0.432	0.002	chr3:89178067-89179092(+)	chr3:89178067-89179095(+)
ENSMUSG00000028049	Scamp3	chr3	+	89180038	89180380	89180251	89180380	89179316	89179437	2031	618712	328329374312	4973	257287298287	100	50	0.0952725	0.614375	0.009,0.027,0.009,0.019	0.008,0.015,0.012,0.005	0.006	chr3:89179437-89180039(+)	chr3:89179437-89180252(+)
ENSMUSG00000035165	Kcne3	chr7	+	100182681	100182823	100182732	100182823	100181135	100181274	2034	1306	1530	4854	5032	100	50	0.184991	0.888772	0.333,0.231,0.0,1.0	0.286,1.0,0.455,0.5	-0.169	chr7:100181274-100182682(+)	chr7:100181274-100182733(+)
ENSMUSG00000000902	Smarcb1	chr10	-	75897444	75897605	75897444	75897576	75904383	75904574	2035	108118	237249283227	6979	235232193271	79	50	0.63953	1	0.026,0.02,0.024,0.022	0.016,0.024,0.022,0.021	0.002	chr10:75897605-75904384(-)	chr10:75897576-75904384(-)
ENSMUSG00000055491	Pprc1	chr19	+	46062140	46062290	46062143	46062290	46061402	46061576	2037	712912	1972626	451011	19232616	53	50	0.252001	1	0.258,0.618,0.246,0.303	0.166,0.17,0.266,0.393	0.107	chr19:46061576-46062141(+)	chr19:46061576-46062144(+)
ENSMUSG00000055491	Pprc1	chr19	+	46068017	46068088	46068020	46068088	46067228	46067286	2038	23163029	23194027	14192223	16332919	53	50	0.640749	1	0.485,0.443,0.414,0.503	0.452,0.352,0.417,0.533	0.023	chr19:46067286-46068018(+)	chr19:46067286-46068021(+)
ENSMUSG00000004508	Gab2	chr7	+	97303023	97303129	97303026	97303129	97302368	97302459	2039	26192829	3723	24221718	4426	53	50	0.5031	1	0.891,0.719,0.93,0.901	0.85,0.838,0.889,0.739	0.031	chr7:97302459-97303024(+)	chr7:97302459-97303027(+)
ENSMUSG00000028057	Rit1	chr3	+	88717572	88717658	88717601	88717658	88717325	88717470	2040	712712	40373326	17844	60303853	79	50	0.123465	0.699222	0.1,0.17,0.118,0.226	0.152,0.144,0.062,0.046	0.053	chr3:88717470-88717573(+)	chr3:88717470-88717602(+)
ENSMUSG00000025326	Ube3a	chr7	+	59271946	59272236	59272142	59272236	59247172	59247217	2042	121748980	1	93957560	0	100	50	1	1	1.0,1.0,1.0,0.976	1.0,1.0,1.0,1.0	-0.006	chr7:59247217-59271947(+)	chr7:59247217-59272143(+)
ENSMUSG00000030780	BC017158	chr7	-	128274632	128274723	128274632	128274703	128276085	128276143	2044	4377	1089610564	3265	78856373	70	50	0.761828	1	0.026,0.022,0.045,0.072	0.027,0.017,0.064,0.047	0.002	chr7:128274723-128276086(-)	chr7:128274703-128276086(-)
ENSMUSG00000079550	Mpp4	chr1	-	59124630	59125200	59124630	59124739	59125522	59125616	2048	1	0	0	1	100	50	1	1	NA,NA,NA,1.0	NA,NA,NA,0.0	1	chr1:59125200-59125523(-)	chr1:59124739-59125523(-)
ENSMUSG00000026135	Zfp142	chr1	-	74579324	74579618	74579324	74579449	74585383	74585697	2050	16121613	1021	1811810	100	100	50	0.668991	1	0.889,1.0,0.8,0.867	1.0,0.846,1.0,1.0	-0.073	chr1:74579618-74585384(-)	chr1:74579449-74585384(-)
ENSMUSG00000026135	Zfp142	chr1	-	74579324	74579927	74579324	74579449	74585383	74585697	2051	17131515	1021	17141314	100	100	50	0.741974	1	0.895,1.0,0.789,0.882	1.0,0.875,1.0,1.0	-0.077	chr1:74579927-74585384(-)	chr1:74579449-74585384(-)
ENSMUSG00000026135	Zfp142	chr1	-	74579324	74579927	74579324	74579618	74585383	74585697	2052	1771114	4122	5101414	2001	100	50	0.00252935	0.0582816	0.68,0.778,0.733,0.778	0.556,1.0,1.0,0.875	-0.115	chr1:74579927-74585384(-)	chr1:74579618-74585384(-)
ENSMUSG00000025939	Ube2w	chr1	-	16585275	16585431	16585275	16585352	16597950	16598053	2055	114104120103	28232223	9712595110	1881010	100	50	0.000671791	0.0224167	0.671,0.693,0.732,0.691	0.729,0.887,0.826,0.846	-0.125	chr1:16585431-16597951(-)	chr1:16585352-16597951(-)
ENSMUSG00000026384	Ptpn4	chr1	-	119773048	119773146	119773048	119773127	119773228	119773271	2057	1	5992	1	11254	69	50	1	1	0.0,0.0,0.0,0.266	0.0,0.0,0.0,0.153	0.028	chr1:119773146-119773229(-)	chr1:119773127-119773229(-)
ENSMUSG00000031278	Acsl4	chrX	-	142351378	142351618	142351378	142351615	142360386	142360436	2060	13111518	4244	8251411	4333	53	50	0.772579	1	0.754,0.838,0.78,0.809	0.654,0.887,0.815,0.776	0.012	chrX:142351618-142360387(-)	chrX:142351615-142360387(-)
ENSMUSG00000031278	Acsl4	chrX	-	142351378	142351908	142351378	142351615	142360386	142360436	2061	1792115	4244	8121814	4333	100	50	0.875386	1	0.68,0.692,0.724,0.652	0.5,0.667,0.75,0.7	0.033	chrX:142351908-142360387(-)	chrX:142351615-142360387(-)
ENSMUSG00000031278	Acsl4	chrX	-	142351378	142351908	142351378	142351618	142360386	142360436	2062	136189	981112	7111410	724107	100	50	0.547362	1	0.419,0.273,0.45,0.273	0.333,0.186,0.412,0.417	0.017	chrX:142351908-142360387(-)	chrX:142351618-142360387(-)
ENSMUSG00000026835	Fcnb	chr2	-	28080585	28080642	28080585	28080621	28080895	28080949	2063	54291813	1222576436338	38302525	749778470493	71	50	0.644208	1	0.03,0.034,0.028,0.026	0.034,0.026,0.036,0.034	-0.003	chr2:28080642-28080896(-)	chr2:28080621-28080896(-)
ENSMUSG00000073139	Tmem185a	chrX	-	70467153	70467361	70467153	70467356	70470117	70470294	2067	26384528	2002	39483425	302	55	50	1	1	0.922,1.0,1.0,0.927	1.0,0.936,1.0,0.919	-0.001	chrX:70467361-70470118(-)	chrX:70467356-70470118(-)
ENSMUSG00000012535	Tnpo3	chr6	-	29554794	29554980	29554794	29554962	29555152	29555309	2073	812144	151139182163	4675	147153147139	68	50	0.0688031	0.514137	0.037,0.06,0.054,0.018	0.02,0.028,0.034,0.026	0.015	chr6:29554980-29555153(-)	chr6:29554962-29555153(-)
ENSMUSG00000020773	Trim47	chr11	-	116106931	116107006	116106931	116107003	116107423	116107622	2074	110113	7121914	374	3669	53	50	0.915065	1	0.119,0.44,0.353,0.168	0.0,0.321,0.524,0.295	-0.015	chr11:116107006-116107424(-)	chr11:116107003-116107424(-)
ENSMUSG00000060679	Mrps9	chr1	+	42899352	42899549	42899440	42899549	42898439	42898608	2076	814310	95139120102	1961	97117109108	100	50	0.0160262	0.207031	0.04,0.048,0.012,0.047	0.005,0.037,0.027,0.005	0.018	chr1:42898608-42899353(+)	chr1:42898608-42899441(+)
ENSMUSG00000068036	Afdn	chr17	+	13807276	13807392	13807279	13807392	13803938	13804134	2077	1241	332	2220	2020	53	50	1	1	1.0,0.386,0.557,0.321	0.485,1.0,0.485,NA	-0.091	chr17:13804134-13807277(+)	chr17:13804134-13807280(+)
ENSMUSG00000068036	Afdn	chr17	+	13808931	13809095	13808934	13809095	13807276	13807392	2078	1135	220	1211	10	53	50	0.260737	1	1.0,0.321,0.586,1.0	1.0,1.0,0.485,1.0	-0.144	chr17:13807392-13808932(+)	chr17:13807392-13808935(+)
ENSMUSG00000015095	Fbxw5	chr2	+	25502856	25503045	25502870	25503045	25502400	25502558	2080	26322221	89977973	27343116	82685866	64	50	0.148425	0.7918	0.186,0.205,0.179,0.184	0.205,0.281,0.295,0.159	-0.046	chr2:25502558-25502857(+)	chr2:25502558-25502871(+)
ENSMUSG00000029472	Anapc5	chr5	-	122788301	122788464	122788301	122788440	122791607	122791755	2082	1208127813961178	1014124	1208120711551189	131098	74	50	0.837644	1	0.988,0.984,0.987,0.995	0.984,0.988,0.989,0.99	0.001	chr5:122788464-122791608(-)	chr5:122788440-122791608(-)
ENSMUSG00000029472	Anapc5	chr5	-	122791607	122791755	122791607	122791735	122791826	122791934	2083	693725779682	7810111093	691646565666	1081079797	70	50	0.0742747	0.537743	0.864,0.837,0.835,0.84	0.82,0.812,0.806,0.831	0.027	chr5:122791755-122791827(-)	chr5:122791735-122791827(-)
ENSMUSG00000029472	Anapc5	chr5	-	122800450	122800608	122800450	122800593	122802129	122802219	2084	107120116118	323275257285	10911111098	192194192180	65	50	0.00222374	0.0536004	0.203,0.251,0.258,0.242	0.304,0.306,0.306,0.295	-0.064	chr5:122800608-122802130(-)	chr5:122800593-122802130(-)
ENSMUSG00000029472	Anapc5	chr5	-	122800450	122800632	122800450	122800593	122802129	122802219	2085	377437427457	323275257285	586552513565	192194192180	89	50	5.71654e-13	4.5195e-10	0.396,0.472,0.483,0.474	0.632,0.615,0.6,0.638	-0.165	chr5:122800632-122802130(-)	chr5:122800593-122802130(-)
ENSMUSG00000029472	Anapc5	chr5	-	122800450	122800632	122800450	122800608	122802129	122802219	2086	290349340371	20322932	489452420476	1211179	74	50	1.65593e-10	5.95083e-08	0.907,0.881,0.888,0.887	0.965,0.965,0.943,0.973	-0.071	chr5:122800632-122802130(-)	chr5:122800608-122802130(-)
ENSMUSG00000028911	Srsf4	chr4	+	131886106	131886304	131886130	131886304	131885308	131885492	2090	3772	33461821	2230	29262423	74	50	0.0153487	0.200898	0.058,0.093,0.208,0.06	0.045,0.049,0.078,0.0	0.062	chr4:131885492-131886107(+)	chr4:131885492-131886131(+)
ENSMUSG00000037509	Arhgef4	chr1	+	34807023	34807291	34807058	34807291	34806314	34806494	2091	1103	7353	103	51055	85	50	0.398978	1	0.078,0.164,0.0,0.37	0.0,0.056,0.0,0.261	0.074	chr1:34806494-34807024(+)	chr1:34806494-34807059(+)
ENSMUSG00000078350	Smim1	chr4	-	154023687	154023887	154023687	154023817	154025503	154025621	2095	29286240	139209	8584662	321177	100	50	0.576102	1	0.527,0.609,0.608,0.69	0.571,0.58,0.575,0.816	-0.027	chr4:154023887-154025504(-)	chr4:154023817-154025504(-)
ENSMUSG00000078350	Smim1	chr4	-	154023687	154023891	154023687	154023817	154025503	154025621	2096	526612066	139209	191267399	321177	100	50	0.65862	1	0.667,0.786,0.75,0.786	0.76,0.75,0.682,0.876	-0.02	chr4:154023891-154025504(-)	chr4:154023817-154025504(-)
ENSMUSG00000078350	Smim1	chr4	-	154023687	154023891	154023687	154023887	154025503	154025621	2097	26436531	243	11743741	494	54	50	0.0695566	0.516837	1.0,0.952,0.938,0.905	1.0,0.945,0.792,0.905	0.038	chr4:154023891-154025504(-)	chr4:154023887-154025504(-)
ENSMUSG00000024805	Pcgf5	chr19	+	36437302	36437362	36437305	36437362	36437154	36437210	2099	144156164127	7147	153137113130	9134	53	50	0.897297	1	0.951,0.993,0.975,0.945	0.941,0.992,0.973,0.968	-0.002	chr19:36437210-36437303(+)	chr19:36437210-36437306(+)
ENSMUSG00000031667	Aktip	chr8	-	91129599	91129843	91129599	91129805	91131040	91131152	2100	10	16232217	1001	12121820	88	50	1	1	0.0,0.0,0.025,0.0	0.045,0.0,0.0,0.028	-0.012	chr8:91129843-91131041(-)	chr8:91129805-91131041(-)
ENSMUSG00000025993	Slc40a1	chr1	-	45925220	45925365	45925220	45925327	45926423	45926519	2102	87726747	57227	58805361	101656	88	50	0.949858	1	0.908,0.854,0.634,0.792	0.767,0.74,0.858,0.852	-0.007	chr1:45925365-45926424(-)	chr1:45925327-45926424(-)
ENSMUSG00000025993	Slc40a1	chr1	-	45925220	45925408	45925220	45925327	45926423	45926519	2103	10310910773	57227	751288096	101656	100	50	0.87327	1	0.912,0.886,0.709,0.839	0.789,0.8,0.889,0.889	-0.005	chr1:45925408-45926424(-)	chr1:45925327-45926424(-)
ENSMUSG00000022783	Spag6l	chr16	-	16829019	16829143	16829019	16829115	16829194	16829313	2105	1101	0	0	100	78	50	1	1	1.0,1.0,NA,1.0	NA,0.0,NA,NA	1	chr16:16829143-16829195(-)	chr16:16829115-16829195(-)
ENSMUSG00000000318	Clec10a	chr11	+	70168582	70168696	70168585	70168696	70167816	70168004	2107	8992	171079	4552	12586	53	50	0.564167	1	0.307,0.459,0.548,0.173	0.239,0.485,0.371,0.239	0.038	chr11:70168004-70168583(+)	chr11:70168004-70168586(+)
ENSMUSG00000027291	Vps39	chr2	-	120325385	120325741	120325385	120325527	120326005	120326149	2111	1022	54565856	123	54346248	100	50	1	1	0.009,0.0,0.017,0.018	0.0,0.014,0.016,0.03	-0.004	chr2:120325741-120326006(-)	chr2:120325527-120326006(-)
ENSMUSG00000063884	Ptcd3	chr6	-	71883443	71883602	71883443	71883592	71884539	71884625	2112	41169	105104124121	11694	80978486	60	50	0.362466	1	0.031,0.081,0.039,0.058	0.103,0.049,0.082,0.037	-0.015	chr6:71883602-71884540(-)	chr6:71883592-71884540(-)
ENSMUSG00000027365	Trpm7	chr2	-	126805016	126805087	126805016	126805084	126807288	126807379	2115	49564942	1413158	54565148	1113717	53	50	0.65805	1	0.768,0.803,0.755,0.832	0.822,0.803,0.873,0.727	-0.017	chr2:126805087-126807289(-)	chr2:126805084-126807289(-)
ENSMUSG00000002107	Celf2	chr2	-	6539704	6546779	6539704	6545675	6547041	6547213	2116	98798882	1011149082	87676445	78866988	100	50	0.489653	1	0.327,0.257,0.328,0.333	0.358,0.28,0.317,0.204	0.022	chr2:6546779-6547042(-)	chr2:6545675-6547042(-)
ENSMUSG00000002107	Celf2	chr2	-	6553784	6553982	6553784	6553964	6560670	6560790	2118	10658	66486140	78611	52365955	68	50	0.560501	1	0.1,0.084,0.057,0.128	0.09,0.14,0.07,0.128	-0.015	chr2:6553982-6560671(-)	chr2:6553964-6560671(-)
ENSMUSG00000068735	Trp53i11	chr2	+	93197608	93197748	93197611	93197748	93196896	93196978	2122	5332	8645	4252	12367	53	50	0.715382	1	0.371,0.321,0.414,0.274	0.239,0.386,0.44,0.212	0.026	chr2:93196978-93197609(+)	chr2:93196978-93197612(+)
ENSMUSG00000055436	Srsf11	chr3	-	158012779	158012896	158012779	158012875	158013951	158014041	2124	41566443	252247249218	44534433	190250220230	71	50	0.565598	1	0.103,0.138,0.153,0.122	0.14,0.13,0.123,0.092	0.008	chr3:158012896-158013952(-)	chr3:158012875-158013952(-)
ENSMUSG00000031907	Zfp90	chr8	+	106418996	106419197	106419070	106419197	106415338	106415770	2126	3330	10131315	1221	4579	100	50	0.57981	1	0.13,0.103,0.103,0.0	0.111,0.167,0.125,0.053	-0.03	chr8:106415770-106418997(+)	chr8:106415770-106419071(+)
ENSMUSG00000031907	Zfp90	chr8	+	106419420	106419610	106419514	106419610	106419070	106419197	2127	41334	106117	4411	64108	100	50	0.129473	0.720395	0.167,0.52,0.12,0.222	0.25,0.333,0.048,0.059	0.085	chr8:106419197-106419421(+)	chr8:106419197-106419515(+)
ENSMUSG00000027072	Prg3	chr2	+	84988658	84988792	84988719	84988792	84988214	84988301	2130	35615310861	110	233408371135	1200	100	50	1	1	1.0,0.987,0.982,1.0	0.991,0.99,1.0,1.0	-0.003	chr2:84988301-84988659(+)	chr2:84988301-84988720(+)
ENSMUSG00000029020	Mfn2	chr4	-	147887205	147887348	147887205	147887313	147887414	147887523	2137	3	86868887	664	119819375	85	50	0.0583402	0.464984	0.0,0.0,0.0,0.02	0.0,0.042,0.037,0.03	-0.022	chr4:147887348-147887415(-)	chr4:147887313-147887415(-)
ENSMUSG00000070953	Rabepk	chr2	-	34785566	34785728	34785566	34785725	34790502	34790655	2142	61699561	311916	64687553	1071011	53	50	0.884236	1	0.95,0.855,0.909,0.782	0.858,0.902,0.876,0.82	0.01	chr2:34785728-34790503(-)	chr2:34785725-34790503(-)
ENSMUSG00000026455	Klhl12	chr1	+	134458427	134458666	134458465	134458666	134455530	134455665	2143	10	56139	2010	713811	88	50	1	1	0.0,0.0,0.042,0.0	0.14,0.0,0.066,0.0	-0.041	chr1:134455665-134458428(+)	chr1:134455665-134458466(+)
ENSMUSG00000026455	Klhl12	chr1	+	134488934	134489121	134489015	134489121	134487643	134487742	2144	78638773	1313	56966770	30	100	50	0.0788749	0.552201	0.975,0.913,0.978,0.924	1.0,1.0,0.918,1.0	-0.032	chr1:134487742-134488935(+)	chr1:134487742-134489016(+)
ENSMUSG00000033257	Ttll4	chr1	+	74678897	74680463	74680353	74680463	74672843	74673010	2148	47464966	1000	44423631	2	100	50	1	1	0.959,1.0,1.0,1.0	1.0,1.0,1.0,0.886	0.018	chr1:74673010-74678898(+)	chr1:74673010-74680354(+)
ENSMUSG00000019996	Map7	chr10	+	20261834	20261983	20261858	20261983	20257183	20257297	2149	2031	36283745	402	31393330	74	50	0.933616	1	0.036,0.0,0.052,0.015	0.0,0.065,0.0,0.043	-0.001	chr10:20257297-20261835(+)	chr10:20257297-20261859(+)
ENSMUSG00000043015	Nemp2	chr1	+	52643121	52643236	52643167	52643236	52642318	52642412	2151	2412117	3368	1018915	3546	96	50	0.856426	1	0.806,0.676,0.488,0.313	0.635,0.652,0.54,0.566	-0.027	chr1:52642412-52643122(+)	chr1:52642412-52643168(+)
ENSMUSG00000041977	Arhgef11	chr3	+	87710650	87711542	87711499	87711542	87709563	87709662	2153	1001	96103	0	5733	100	50	1	1	0.053,0.0,0.0,0.143	0.0,0.0,0.0,0.0	0.049	chr3:87709662-87710651(+)	chr3:87709662-87711500(+)
ENSMUSG00000041977	Arhgef11	chr3	+	87717420	87717520	87717423	87717520	87717029	87717174	2154	1991110	76107	91226	1346	53	50	0.594455	1	0.719,0.586,0.509,0.574	0.895,0.791,0.321,0.485	-0.026	chr3:87717174-87717421(+)	chr3:87717174-87717424(+)
ENSMUSG00000002105	Slc39a13	chr2	-	91065581	91065714	91065581	91065700	91066012	91066126	2155	2325	5142211	2251	12151011	64	50	0.711211	1	0.238,0.143,0.066,0.262	0.115,0.094,0.281,0.066	0.038	chr2:91065714-91066013(-)	chr2:91065700-91066013(-)
ENSMUSG00000002105	Slc39a13	chr2	-	91065581	91065739	91065581	91065700	91066012	91066126	2156	4328	5142211	811105	12151011	89	50	0.0395056	0.376442	0.31,0.107,0.049,0.29	0.272,0.292,0.36,0.203	-0.093	chr2:91065739-91066013(-)	chr2:91065700-91066013(-)
ENSMUSG00000002105	Slc39a13	chr2	-	91065581	91065739	91065581	91065714	91066012	91066126	2157	2114	111	6984	30	75	50	0.72124	1	1.0,0.4,0.4,0.727	1.0,1.0,0.64,1.0	-0.278	chr2:91065739-91066013(-)	chr2:91065714-91066013(-)
ENSMUSG00000042210	Abhd14a	chr9	-	106440620	106440910	106440620	106440856	106443826	106443942	2159	63709355	38265046	20283021	66665659	100	50	1.40998e-14	2.78683e-11	0.453,0.574,0.482,0.374	0.132,0.175,0.211,0.151	0.303	chr9:106440910-106443827(-)	chr9:106440856-106443827(-)
ENSMUSG00000114515	Aldoa	chr7	-	126808095	126808294	126808095	126808236	126808869	126809108	2161	2451	6242	2111	9322	100	50	0.0314524	0.321269	0.143,0.5,0.385,0.2	0.1,0.143,0.2,0.2	0.146	chr7:126808294-126808870(-)	chr7:126808236-126808870(-)
ENSMUSG00000038271	Iffo1	chr6	+	125151794	125151803	125151797	125151803	125151384	125151525	2162	1311717	1300	918910	2100	53	50	1	1	0.925,0.776,1.0,1.0	0.809,0.944,1.0,1.0	-0.013	chr6:125151525-125151795(+)	chr6:125151525-125151798(+)
ENSMUSG00000038271	Iffo1	chr6	+	125151794	125152771	125152613	125152771	125151384	125151525	2164	22181518	4626	16341316	7984	100	50	0.267462	1	0.733,0.6,0.789,0.6	0.533,0.654,0.448,0.667	0.105	chr6:125151525-125151795(+)	chr6:125151525-125152614(+)
ENSMUSG00000038271	Iffo1	chr6	+	125152443	125152771	125152613	125152771	125151384	125151525	2165	9782	4626	81758	7984	100	50	0.950002	1	0.529,0.368,0.667,0.143	0.364,0.486,0.238,0.5	0.03	chr6:125151525-125152444(+)	chr6:125151525-125152614(+)
ENSMUSG00000038271	Iffo1	chr6	+	125153406	125153502	125153409	125153502	125153041	125153162	2167	16221418	101576	20292622	1013127	53	50	0.473497	1	0.602,0.58,0.654,0.739	0.654,0.678,0.671,0.748	-0.044	chr6:125153162-125153407(+)	chr6:125153162-125153410(+)
ENSMUSG00000040943	Tet2	chr3	-	133469275	133469767	133469275	133469639	133471339	133471477	2168	0	101486	2000	1013119	100	50	1	1	0.0,0.0,0.0,0.0	0.091,0.0,0.0,0.0	-0.023	chr3:133469767-133471340(-)	chr3:133469639-133471340(-)
ENSMUSG00000037628	Cdkn3	chr14	+	46769832	46769936	46769835	46769936	46768865	46768897	2169	57605172	816117	42454458	5744	53	50	0.0536779	0.448995	0.87,0.78,0.814,0.907	0.888,0.858,0.912,0.932	-0.055	chr14:46768897-46769833(+)	chr14:46768897-46769836(+)
ENSMUSG00000040225	Prrc2c	chr1	-	162723109	162723287	162723109	162723281	162724703	162724869	2176	37385536	18111715	46413136	8151015	56	50	0.478708	1	0.647,0.755,0.743,0.682	0.837,0.709,0.735,0.682	-0.034	chr1:162723287-162724704(-)	chr1:162723281-162724704(-)
ENSMUSG00000022106	Rcbtb2	chr14	+	73154314	73154408	73154319	73154408	73151532	73151615	2183	62606051	0	61647555	100	55	50	1	1	1.0,1.0,1.0,1.0	1.0,0.983,1.0,1.0	0.004	chr14:73151615-73154315(+)	chr14:73151615-73154320(+)
ENSMUSG00000022106	Rcbtb2	chr14	+	73166479	73166638	73166531	73166638	73162326	73162477	2184	102716874	122	78777074	624	100	50	0.0251341	0.277528	1.0,0.973,0.944,0.949	1.0,0.865,0.946,0.902	0.038	chr14:73162477-73166480(+)	chr14:73162477-73166532(+)
ENSMUSG00000035027	Map2k2	chr10	+	81118976	81119160	81119108	81119160	81118151	81118229	2186	4869	316328404288	9479	296282263273	100	50	0.792018	1	0.006,0.012,0.007,0.015	0.015,0.007,0.013,0.016	-0.003	chr10:81118229-81118977(+)	chr10:81118229-81119109(+)
ENSMUSG00000035027	Map2k2	chr10	+	81121042	81121110	81121045	81121110	81119489	81119703	2187	87809084	157148167147	70797666	151152156144	53	50	0.267808	1	0.343,0.338,0.337,0.35	0.304,0.329,0.315,0.302	0.029	chr10:81119703-81121043(+)	chr10:81119703-81121046(+)
ENSMUSG00000037606	Osbpl5	chr7	-	143713495	143714008	143713495	143713578	143715665	143715822	2190	5822	302	3150	2122	100	50	0.0227547	0.259772	1.0,0.571,1.0,0.333	0.429,0.333,0.556,0.0	0.396	chr7:143714008-143715666(-)	chr7:143713578-143715666(-)
ENSMUSG00000003166	Dgcr2	chr16	-	17858359	17858579	17858359	17858570	17859403	17859526	2191	62627067	31313130	68695073	29293734	59	50	0.766475	1	0.629,0.629,0.657,0.654	0.665,0.668,0.534,0.645	0.014	chr16:17858579-17859404(-)	chr16:17858570-17859404(-)
ENSMUSG00000003166	Dgcr2	chr16	-	17859403	17859526	17859403	17859523	17872562	17872685	2192	897711190	0	74836879	1000	53	50	1	1	1.0,1.0,1.0,1.0	0.986,1.0,1.0,1.0	0.004	chr16:17859526-17872563(-)	chr16:17859523-17872563(-)
ENSMUSG00000028064	Sema4a	chr3	-	88451344	88451467	88451344	88451450	88451687	88451786	2193	13448	163915799	9862	174114120139	67	50	0.142984	0.771972	0.056,0.032,0.05,0.057	0.037,0.05,0.036,0.011	0.015	chr3:88451467-88451688(-)	chr3:88451450-88451688(-)
ENSMUSG00000028064	Sema4a	chr3	-	88451344	88451497	88451344	88451450	88451687	88451786	2194	19846	163915799	111483	174114120139	97	50	0.253279	1	0.057,0.043,0.035,0.03	0.032,0.06,0.033,0.011	0.007	chr3:88451497-88451688(-)	chr3:88451450-88451688(-)
ENSMUSG00000028064	Sema4a	chr3	-	88451344	88451497	88451344	88451467	88451687	88451786	2195	11844	5446	71063	5442	80	50	0.610649	1	0.579,0.556,0.385,0.294	0.467,0.61,0.484,0.484	-0.058	chr3:88451497-88451688(-)	chr3:88451467-88451688(-)
ENSMUSG00000059834	Sclt1	chr3	-	41671384	41671502	41671384	41671483	41675327	41675505	2196	112	23271816	1001	23221821	69	50	0.281039	1	0.0,0.026,0.039,0.083	0.031,0.0,0.0,0.033	0.021	chr3:41671502-41675328(-)	chr3:41671483-41675328(-)
ENSMUSG00000059834	Sclt1	chr3	-	41730860	41730919	41730860	41730914	41734167	41734235	2197	25362518	1000	35332625	111	55	50	1	1	0.958,1.0,1.0,1.0	1.0,0.968,0.959,0.958	0.018	chr3:41730919-41734168(-)	chr3:41730914-41734168(-)
ENSMUSG00000029089	5730480H06Rik	chr5	+	48374372	48374538	48374383	48374538	48374179	48374247	2199	1411	18192018	2110	29131611	61	50	0.272534	1	0.044,0.147,0.039,0.044	0.054,0.059,0.049,0.0	0.028	chr5:48374247-48374373(+)	chr5:48374247-48374384(+)
ENSMUSG00000033439	Trmt13	chr3	-	116582493	116582923	116582493	116582724	116585195	116585270	2203	24111425	2051	9222228	3319	100	50	0.160865	0.824771	0.857,1.0,0.583,0.926	0.6,0.786,0.917,0.609	0.114	chr3:116582923-116585196(-)	chr3:116582724-116585196(-)
ENSMUSG00000033439	Trmt13	chr3	-	116588471	116588639	116588471	116588524	116589490	116589597	2204	13111515	5525	15292029	2042	100	50	0.00304475	0.0658765	0.565,0.524,0.789,0.6	0.789,1.0,0.714,0.879	-0.226	chr3:116588639-116589491(-)	chr3:116588524-116589491(-)
ENSMUSG00000004099	Dnmt1	chr9	-	20940475	20940554	20940475	20940551	20941372	20941583	2206	165155198180	160126140153	135161142123	10889117105	53	50	0.380512	1	0.493,0.537,0.572,0.526	0.541,0.631,0.534,0.525	-0.026	chr9:20940554-20941373(-)	chr9:20940551-20941373(-)
ENSMUSG00000038695	Josd2	chr7	+	44470858	44471307	44471112	44471307	44470411	44470537	2207	53486241	70549547	29623136	58868270	100	50	0.0147081	0.193804	0.275,0.308,0.246,0.304	0.2,0.265,0.159,0.205	0.076	chr7:44470537-44470859(+)	chr7:44470537-44471113(+)
ENSMUSG00000030805	Stx4a	chr7	+	127842422	127842544	127842444	127842544	127842263	127842365	2210	23181510	161175167141	922168	156166145124	72	50	0.605971	1	0.09,0.067,0.059,0.047	0.039,0.084,0.071,0.043	0.007	chr7:127842365-127842423(+)	chr7:127842365-127842445(+)
ENSMUSG00000015377	Dennd6b	chr15	-	89186955	89187050	89186955	89186998	89187147	89187243	2212	7434	6002	4647	1601	100	50	0.880352	1	0.368,1.0,1.0,0.5	0.667,0.333,1.0,0.778	0.022	chr15:89187050-89187148(-)	chr15:89186998-89187148(-)
ENSMUSG00000026335	Pam	chr1	-	97825836	97826040	97825836	97826037	97831454	97831508	2213	951028978	71269	57535455	8268	53	50	0.741917	1	0.928,0.889,0.933,0.891	0.87,0.962,0.895,0.866	0.012	chr1:97826040-97831455(-)	chr1:97826037-97831455(-)
ENSMUSG00000078789	Dph1	chr11	-	75180560	75180689	75180560	75180661	75180787	75180944	2215	1011	35584656	1030	42374046	78	50	1	1	0.018,0.0,0.014,0.011	0.015,0.0,0.046,0.0	-0.005	chr11:75180689-75180788(-)	chr11:75180661-75180788(-)
ENSMUSG00000020232	Hmg20b	chr10	-	81347435	81347562	81347435	81347508	81347985	81348032	2216	4775	74855948	5312	66816558	100	50	0.0203673	0.243238	0.026,0.04,0.056,0.05	0.036,0.018,0.008,0.017	0.023	chr10:81347562-81347986(-)	chr10:81347508-81347986(-)
ENSMUSG00000027177	Hipk3	chr2	-	104436996	104437120	104436996	104437069	104437850	104438007	2220	80789259	301	66767865	30	100	50	1	1	1.0,0.929,1.0,0.967	1.0,1.0,0.929,1.0	-0.008	chr2:104437120-104437851(-)	chr2:104437069-104437851(-)
ENSMUSG00000038039	Gcc2	chr10	+	58256746	58256904	58256819	58256904	58255828	58255882	2222	2012	56618	1211	710812	100	50	0.406095	1	0.167,0.0,0.077,0.053	0.067,0.091,0.059,0.04	0.01	chr10:58255882-58256747(+)	chr10:58255882-58256820(+)
ENSMUSG00000030603	Psmc4	chr7	-	28049103	28049700	28049103	28049202	28049982	28050056	2226	311135	244229265222	52613	228261189203	100	50	0.640892	1	0.006,0.023,0.024,0.011	0.011,0.004,0.016,0.031	0.001	chr7:28049700-28049983(-)	chr7:28049202-28049983(-)
ENSMUSG00000029016	Clcn6	chr4	-	148010653	148010810	148010653	148010776	148010971	148011129	2229	7201213	7322	68812	3131	84	50	0.621619	1	0.373,0.799,0.781,0.795	0.543,0.826,0.613,0.877	-0.028	chr4:148010810-148010972(-)	chr4:148010776-148010972(-)
ENSMUSG00000029016	Clcn6	chr4	-	148024108	148024224	148024108	148024215	148026532	148026599	2230	10	11873	0	2589	59	50	1	1	0.0,0.0,0.108,0.0	0.0,0.0,0.0,0.0	0.027	chr4:148024224-148026533(-)	chr4:148024215-148026533(-)
ENSMUSG00000040272	Accs	chr2	-	93847916	93848189	93847916	93848186	93849764	93849939	2237	316105	1441	1216114	5156	53	50	0.428172	1	0.739,0.791,0.702,0.825	0.694,0.938,0.675,0.386	0.091	chr2:93848189-93849765(-)	chr2:93848186-93849765(-)
ENSMUSG00000024947	Men1	chr19	+	6337478	6337519	6337481	6337519	6337152	6337281	2238	84829287	1110	90749288	115	53	50	0.543088	1	0.988,0.987,0.989,1.0	1.0,0.986,0.989,0.943	0.011	chr19:6337281-6337479(+)	chr19:6337281-6337482(+)
ENSMUSG00000022844	Pdia5	chr16	-	35410293	35410454	35410293	35410435	35410926	35410997	2246	108989680	1001	14598113101	220	69	50	1	1	0.987,1.0,1.0,0.983	1.0,0.973,0.976,1.0	0.005	chr16:35410454-35410927(-)	chr16:35410435-35410927(-)
ENSMUSG00000079036	Alkbh1	chr12	-	87431399	87431538	87431399	87431536	87434118	87434209	2247	17251933	0	14201614	10	52	50	1	1	1.0,1.0,1.0,1.0	1.0,1.0,0.939,1.0	0.015	chr12:87431538-87434119(-)	chr12:87431536-87434119(-)
ENSMUSG00000079036	Alkbh1	chr12	-	87431399	87431593	87431399	87431536	87434118	87434209	2248	90818077	0	54686044	10	100	50	1	1	1.0,1.0,1.0,1.0	1.0,1.0,0.968,1.0	0.008	chr12:87431593-87434119(-)	chr12:87431536-87434119(-)
ENSMUSG00000079036	Alkbh1	chr12	-	87431399	87431593	87431399	87431538	87434118	87434209	2249	90828275	15251931	54656045	14171514	100	50	0.941158	1	0.75,0.621,0.683,0.547	0.659,0.657,0.667,0.616	0.001	chr12:87431593-87434119(-)	chr12:87431538-87434119(-)
ENSMUSG00000032067	Pts	chr9	-	50524722	50524964	50524722	50524779	50525261	50525284	2251	27173019	82909176	30242214	13312911199	100	50	0.0440196	0.398586	0.141,0.086,0.142,0.111	0.101,0.085,0.09,0.066	0.034	chr9:50524964-50525262(-)	chr9:50524779-50525262(-)
ENSMUSG00000003420	Fcgrt	chr7	-	45102413	45102671	45102413	45102593	45103002	45103273	2255	12291115	1001	16111720	2000	100	50	1	1	0.857,1.0,1.0,0.882	0.8,1.0,1.0,1.0	-0.015	chr7:45102671-45103003(-)	chr7:45102593-45103003(-)
ENSMUSG00000033021	Gmppa	chr1	+	75440411	75440542	75440487	75440542	75439344	75439404	2260	224195226178	2733	275183177195	132	100	50	0.0194999	0.237179	0.982,0.933,0.974,0.967	1.0,0.989,0.967,0.98	-0.02	chr1:75439404-75440412(+)	chr1:75439404-75440488(+)
ENSMUSG00000025212	Sfxn3	chr19	+	45049103	45049267	45049106	45049267	45047575	45047890	2261	24394636	1011	29243334	1010	53	50	1	1	0.958,1.0,0.977,0.971	0.965,1.0,0.969,1.0	-0.007	chr19:45047890-45049104(+)	chr19:45047890-45049107(+)
ENSMUSG00000028347	Tmeff1	chr4	+	48617231	48617331	48617234	48617331	48614956	48614983	2263	2	1000	1000	0	53	50	1	1	0.0,NA,NA,1.0	1.0,NA,NA,NA	-0.5	chr4:48614983-48617232(+)	chr4:48614983-48617235(+)
ENSMUSG00000068823	Csde1	chr3	+	103044577	103044841	103044628	103044841	103043805	103043931	2266	1513514	287244303256	118138	233230192244	100	50	0.972871	1	0.025,0.026,0.008,0.027	0.023,0.017,0.033,0.016	-0.001	chr3:103043931-103044578(+)	chr3:103043931-103044629(+)
ENSMUSG00000068823	Csde1	chr3	+	103044577	103044841	103044758	103044841	103043805	103043931	2267	289231291245	1111	264268239221	1300	100	50	1	1	0.993,0.991,0.993,0.992	0.992,0.978,1.0,1.0	0	chr3:103043931-103044578(+)	chr3:103043931-103044759(+)
ENSMUSG00000068823	Csde1	chr3	+	103044628	103044841	103044758	103044841	103043805	103043931	2268	576475593501	1111	497497430465	1300	100	50	1	1	0.997,0.996,0.997,0.996	0.996,0.988,1.0,1.0	0	chr3:103043931-103044629(+)	chr3:103043931-103044759(+)
ENSMUSG00000026641	Usf1	chr1	+	171414372	171414529	171414436	171414529	171411312	171411440	2269	1741816	171168154165	20192828	154127138119	100	50	5.75496e-05	0.00329701	0.047,0.012,0.055,0.046	0.061,0.07,0.092,0.105	-0.042	chr1:171411440-171414373(+)	chr1:171411440-171414437(+)
ENSMUSG00000046169	Adamts6	chr13	+	104313630	104313719	104313635	104313719	104312714	104312926	2270	1210	2101	1101	30	55	50	0.714846	1	0.312,0.645,1.0,0.0	1.0,1.0,0.0,1.0	-0.261	chr13:104312926-104313631(+)	chr13:104312926-104313636(+)
ENSMUSG00000039262	Prrc2b	chr2	+	32219213	32219405	32219216	32219405	32218676	32218759	2271	30293025	75648858	24202122	54616451	53	50	0.723687	1	0.274,0.299,0.243,0.289	0.295,0.236,0.236,0.289	0.012	chr2:32218759-32219214(+)	chr2:32218759-32219217(+)
ENSMUSG00000039262	Prrc2b	chr2	+	32221079	32221184	32221083	32221184	32220089	32220176	2272	8611810997	3000	89828394	110	54	50	1	1	0.964,1.0,1.0,1.0	1.0,0.987,0.987,1.0	-0.003	chr2:32220176-32221080(+)	chr2:32220176-32221084(+)
ENSMUSG00000042594	Sh2b3	chr5	-	121818464	121818679	121818464	121818649	121818759	121818854	2275	124819468	1010	88928088	110	80	50	1	1	0.987,1.0,0.983,1.0	1.0,0.983,0.98,1.0	0.002	chr5:121818679-121818760(-)	chr5:121818649-121818760(-)
ENSMUSG00000079435	Rpl36a	chrX	+	134586510	134586578	134586511	134586578	134586077	134586183	2276	3971485149354066	1	3833427932573843	1	51	50	1	1	1.0,1.0,1.0,1.0	1.0,1.0,1.0,1.0	0	chrX:134586183-134586511(+)	chrX:134586183-134586512(+)
ENSMUSG00000028639	Ybx1	chr4	-	119278933	119279211	119278933	119279199	119281569	119281652	2279	198229211215	3132297535443129	210185167174	3256286827622788	62	50	0.508903	1	0.049,0.058,0.046,0.053	0.049,0.049,0.046,0.048	0.004	chr4:119279211-119281570(-)	chr4:119279199-119281570(-)
ENSMUSG00000060036	Rpl3	chr15	-	80080895	80081211	80080895	80081031	80081614	80081783	2280	426494327343	3786401342663686	291427343290	3471336230713034	100	50	0.692666	1	0.053,0.058,0.037,0.044	0.04,0.06,0.053,0.046	-0.002	chr15:80081211-80081615(-)	chr15:80081031-80081615(-)
ENSMUSG00000018750	Zbtb4	chr11	+	69775801	69776889	69775861	69776889	69775375	69775442	2284	0	2431	100	2224	100	50	1	1	0.0,0.0,0.0,0.0	0.0,0.2,0.0,0.0	-0.05	chr11:69775442-69775802(+)	chr11:69775442-69775862(+)
ENSMUSG00000026090	2010300C02Rik	chr1	-	37611676	37612399	37611676	37612396	37613336	37613481	2285	1300	2	1001	2	53	50	1	1	1.0,1.0,NA,0.0	1.0,NA,NA,0.321	0.006	chr1:37612399-37613337(-)	chr1:37612396-37613337(-)
ENSMUSG00000003868	Ruvbl2	chr7	-	45422091	45422206	45422091	45422134	45422384	45422514	2287	541561663557	7151	478500454488	2324	100	50	0.884445	1	0.975,0.996,0.985,0.996	0.992,0.988,0.991,0.984	-0.001	chr7:45422206-45422385(-)	chr7:45422134-45422385(-)
ENSMUSG00000031660	Brd7	chr8	-	88334104	88334219	88334104	88334216	88337080	88337137	2289	23302923	198202274225	17281920	181187194183	53	50	0.792965	1	0.099,0.123,0.091,0.088	0.081,0.124,0.085,0.093	0.005	chr8:88334219-88337081(-)	chr8:88334216-88337081(-)
ENSMUSG00000025507	Pidd1	chr7	-	141440457	141440605	141440457	141440521	141440685	141440865	2290	110977188	4321	61706370	3221	100	50	0.85364	1	0.932,0.942,0.947,0.978	0.91,0.946,0.94,0.972	0.008	chr7:141440605-141440686(-)	chr7:141440521-141440686(-)
ENSMUSG00000025507	Pidd1	chr7	-	141441172	141441374	141441172	141441316	141441474	141441529	2291	80887790	1112148	62644953	116515	100	50	0.581902	1	0.784,0.786,0.733,0.849	0.738,0.842,0.831,0.639	0.026	chr7:141441374-141441475(-)	chr7:141441316-141441475(-)
ENSMUSG00000025507	Pidd1	chr7	-	141441611	141441821	141441611	141441784	141442150	141442564	2292	60584544	2645	35404545	5715	87	50	0.504823	1	0.945,0.847,0.866,0.835	0.801,0.767,0.963,0.838	0.031	chr7:141441821-141442151(-)	chr7:141441784-141442151(-)
ENSMUSG00000025507	Pidd1	chr7	-	141441611	141441860	141441611	141441784	141442150	141442564	2293	37493136	2645	24232529	5715	100	50	0.27746	1	0.902,0.803,0.795,0.783	0.706,0.622,0.926,0.744	0.071	chr7:141441860-141442151(-)	chr7:141441784-141442151(-)
ENSMUSG00000025507	Pidd1	chr7	-	141441611	141441860	141441611	141441821	141442150	141442564	2294	6161014	26222016	9747	16182320	89	50	0.134919	0.739718	0.115,0.29,0.219,0.33	0.24,0.179,0.089,0.164	0.07	chr7:141441860-141442151(-)	chr7:141441821-141442151(-)
ENSMUSG00000017686	Rhot1	chr11	+	80243369	80243490	80243401	80243490	80242572	80242681	2297	73837092	6464	82727967	3244	82	50	0.229249	0.99149	0.881,0.927,0.877,0.933	0.943,0.956,0.923,0.911	-0.029	chr11:80242681-80243370(+)	chr11:80242681-80243402(+)
ENSMUSG00000043059	Zfp513	chr5	-	31200234	31200386	31200234	31200383	31200651	31200762	2299	6362	41	3121	10	53	50	0.136855	0.746191	1.0,1.0,0.586,0.654	1.0,1.0,0.654,1.0	-0.104	chr5:31200386-31200652(-)	chr5:31200383-31200652(-)
ENSMUSG00000002372	Ranbp3	chr17	+	56701022	56702890	56702762	56702890	56696717	56696789	2300	102114113127	6952	8915111395	3425	100	50	0.17107	0.853837	0.895,0.864,0.919,0.969	0.937,0.95,0.966,0.905	-0.028	chr17:56696789-56701023(+)	chr17:56696789-56702763(+)
ENSMUSG00000040651	Fam208a	chr14	+	27480641	27483555	27480915	27483555	27479923	27480091	2302	36282730	1222	26202222	1272	100	50	0.111523	0.665934	0.947,0.875,0.871,0.882	0.929,0.833,0.611,0.846	0.089	chr14:27480091-27480642(+)	chr14:27480091-27480916(+)
ENSMUSG00000062713	Sim2	chr16	+	94123164	94123576	94123172	94123576	94122602	94122771	2307	1022	100	1112	10	58	50	1	1	1.0,0.0,1.0,1.0	1.0,1.0,0.463,1.0	-0.116	chr16:94122771-94123165(+)	chr16:94122771-94123173(+)
ENSMUSG00000022822	Abcc5	chr16	-	20392450	20392922	20392450	20392807	20396014	20396122	2308	3612	24143318	3334	17271630	100	50	0.686576	1	0.059,0.176,0.015,0.053	0.081,0.053,0.086,0.062	0.005	chr16:20392922-20396015(-)	chr16:20392807-20396015(-)
ENSMUSG00000033083	Tbc1d4	chr14	-	101489511	101489622	101489511	101489619	101489852	101489944	2309	1751614	0	1891012	100	53	50	1	1	1.0,1.0,1.0,1.0	1.0,0.895,1.0,1.0	0.026	chr14:101489622-101489853(-)	chr14:101489619-101489853(-)
ENSMUSG00000026082	Rev1	chr1	-	38074314	38075023	38074314	38074443	38079289	38079398	2310	25101014	40383435	20151511	19322921	100	50	0.100308	0.629394	0.238,0.116,0.128,0.167	0.345,0.19,0.205,0.208	-0.075	chr1:38075023-38079290(-)	chr1:38074443-38079290(-)
ENSMUSG00000036864	Proser3	chr7	-	30539133	30539582	30539133	30539578	30539748	30539830	2313	19141417	3562	1291114	233	54	50	0.228612	0.989823	0.854,0.722,0.684,0.887	1.0,0.806,0.772,0.812	-0.061	chr7:30539582-30539749(-)	chr7:30539578-30539749(-)
ENSMUSG00000036864	Proser3	chr7	-	30546124	30546228	30546124	30546225	30546302	30546427	2314	3012	10131413	3212	126413	53	50	0.242954	1	0.221,0.0,0.063,0.127	0.191,0.239,0.191,0.127	-0.084	chr7:30546228-30546303(-)	chr7:30546225-30546303(-)
ENSMUSG00000034724	Cnot6l	chr5	-	96131058	96131245	96131058	96131241	96134010	96134132	2315	47477861	2230	53563837	4612	54	50	0.0392897	0.376058	0.956,0.956,0.96,1.0	0.925,0.896,0.972,0.945	0.033	chr5:96131245-96134011(-)	chr5:96131241-96134011(-)
ENSMUSG00000010453	Kansl3	chr1	-	36365481	36365652	36365481	36365585	36367768	36368034	2317	98648974	2130	49657160	1433	100	50	0.0408615	0.38006	0.961,0.97,0.937,1.0	0.961,0.89,0.922,0.909	0.046	chr1:36365652-36367769(-)	chr1:36365585-36367769(-)
ENSMUSG00000042198	Chchd7	chr4	+	3939378	3939526	3939423	3939526	3938913	3939131	2319	708811058	5634	110908481	131279	95	50	0.00780729	0.129131	0.881,0.885,0.951,0.884	0.817,0.798,0.863,0.826	0.074	chr4:3939131-3939379(+)	chr4:3939131-3939424(+)
ENSMUSG00000042198	Chchd7	chr4	+	3942634	3942819	3942720	3942819	3941245	3941311	2320	2504	709111777	1152	1269110490	100	50	0.695601	1	0.014,0.027,0.0,0.025	0.004,0.005,0.023,0.011	0.006	chr4:3941311-3942635(+)	chr4:3941311-3942721(+)
ENSMUSG00000031400	G6pdx	chrX	-	74412318	74412480	74412318	74412477	74413863	74414081	2321	5453	331302249259	3110	306326262230	53	50	0.819968	1	0.014,0.012,0.019,0.011	0.009,0.003,0.004,0.0	0.01	chrX:74412480-74413864(-)	chrX:74412477-74413864(-)
ENSMUSG00000027900	Dram2	chr3	+	106555163	106555308	106555166	106555308	106552155	106552280	2327	36414021	4682	28403733	8275	53	50	0.808117	1	0.895,0.866,0.825,0.908	0.768,0.95,0.833,0.862	0.02	chr3:106552280-106555164(+)	chr3:106552280-106555167(+)
ENSMUSG00000037570	Mcrs1	chr15	-	99249875	99250014	99249875	99250006	99250462	99250582	2328	123137156111	1100	115140109105	200	58	50	1	1	0.991,0.992,1.0,1.0	1.0,0.984,1.0,1.0	0	chr15:99250014-99250463(-)	chr15:99250006-99250463(-)
ENSMUSG00000026110	Mgat4a	chr1	-	37466536	37466583	37466536	37466579	37490259	37490393	2334	13161222	2121	125513	1112	54	50	0.619133	1	0.858,0.937,0.847,0.953	0.917,0.822,0.822,0.858	0.044	chr1:37466583-37490260(-)	chr1:37466579-37490260(-)
ENSMUSG00000031785	Adgrg1	chr8	+	95003235	95003673	95003250	95003673	95002438	95002513	2335	19254224	346409613446	19263738	344389356450	65	50	0.103337	0.644312	0.041,0.045,0.05,0.04	0.041,0.049,0.074,0.061	-0.012	chr8:95002513-95003236(+)	chr8:95002513-95003251(+)
ENSMUSG00000037138	Aff3	chr1	-	38252640	38252681	38252640	38252678	38269709	38269761	2337	1582412	3036	1781122	8549	53	50	0.0313242	0.320789	0.825,1.0,0.883,0.654	0.667,0.602,0.722,0.698	0.168	chr1:38252681-38269710(-)	chr1:38252678-38269710(-)
ENSMUSG00000040557	Mettl27	chr5	+	134932621	134932847	134932720	134932847	134932372	134932410	2340	20241920	314	14141414	1031	100	50	0.458842	1	1.0,0.8,0.905,0.714	0.875,1.0,0.7,0.875	-0.008	chr5:134932410-134932622(+)	chr5:134932410-134932721(+)
ENSMUSG00000035206	Sppl2b	chr10	+	80863176	80863319	80863179	80863319	80862954	80863094	2342	16272228	32454757	20402428	27613238	53	50	0.0852233	0.575876	0.321,0.361,0.306,0.317	0.411,0.382,0.414,0.41	-0.078	chr10:80863094-80863177(+)	chr10:80863094-80863180(+)
ENSMUSG00000029622	Arpc1b	chr5	+	145125878	145125966	145125890	145125966	145125577	145125784	2343	14141918	122210361008907	16141823	1435107010811016	62	50	1	1	0.009,0.011,0.015,0.016	0.009,0.01,0.013,0.018	0	chr5:145125784-145125879(+)	chr5:145125784-145125891(+)
ENSMUSG00000041570	Camsap2	chr1	-	136274800	136274900	136274800	136274873	136276537	136276758	2344	1252	215116	1120	791210	77	50	0.0182506	0.224052	0.245,0.08,0.228,0.178	0.085,0.067,0.098,0.0	0.12	chr1:136274900-136276538(-)	chr1:136274873-136276538(-)
ENSMUSG00000031486	Adgra2	chr8	+	27115654	27115874	27115788	27115874	27115236	27115461	2345	12	1000	2041	0	100	50	1	1	0.0,NA,1.0,1.0	1.0,NA,1.0,1.0	-0.333	chr8:27115461-27115655(+)	chr8:27115461-27115789(+)
ENSMUSG00000054226	Tprkb	chr6	+	85927240	85927363	85927258	85927363	85924359	85924522	2354	86807678	132	68765894	1001	68	50	0.489405	1	1.0,0.983,0.949,0.966	0.98,1.0,1.0,0.986	-0.017	chr6:85924522-85927241(+)	chr6:85924522-85927259(+)
ENSMUSG00000032913	Lrig2	chr3	-	104462658	104462808	104462658	104462787	104463858	104464308	2359	13231113	2251	2014126	352	71	50	0.86465	1	0.821,0.89,0.608,0.902	1.0,0.767,0.628,0.679	0.037	chr3:104462808-104463859(-)	chr3:104462787-104463859(-)
ENSMUSG00000032913	Lrig2	chr3	-	104462658	104462845	104462658	104462787	104463858	104464308	2360	10649	2251	7876	352	100	50	0.874181	1	0.714,0.6,0.286,0.818	1.0,0.571,0.412,0.6	-0.041	chr3:104462845-104463859(-)	chr3:104462787-104463859(-)
ENSMUSG00000032913	Lrig2	chr3	-	104462658	104462845	104462658	104462808	104463858	104464308	2361	6022	71796	2714	141063	87	50	0.308915	1	0.33,0.0,0.113,0.161	0.076,0.287,0.087,0.434	-0.07	chr3:104462845-104463859(-)	chr3:104462808-104463859(-)
ENSMUSG00000041763	Tpp2	chr1	+	43972529	43972687	43972555	43972687	43971563	43971732	2362	968311079	1010	68896486	1	76	50	1	1	0.984,1.0,0.986,1.0	1.0,1.0,1.0,0.983	-0.003	chr1:43971732-43972530(+)	chr1:43971732-43972556(+)
ENSMUSG00000020128	Vps54	chr11	+	21264629	21264871	21264665	21264871	21263198	21263354	2364	21312220	9101113	27242224	7201111	86	50	0.81634	1	0.576,0.643,0.538,0.472	0.692,0.411,0.538,0.559	0.007	chr11:21263354-21264630(+)	chr11:21263354-21264666(+)
ENSMUSG00000035835	Plppr3	chr10	-	79866834	79867030	79866834	79866878	79867171	79867307	2365	347388302278	7763	408316283318	5411	100	50	0.0196764	0.238591	0.961,0.965,0.962,0.979	0.976,0.975,0.993,0.994	-0.018	chr10:79867030-79867172(-)	chr10:79866878-79867172(-)
ENSMUSG00000026004	Kansl1l	chr1	-	66773421	66773619	66773421	66773514	66777966	66778108	2366	2348	15141216	2021129	1315716	100	50	2.63418e-05	0.00173549	0.062,0.097,0.143,0.2	0.435,0.412,0.462,0.22	-0.257	chr1:66773619-66777967(-)	chr1:66773514-66777967(-)
ENSMUSG00000057789	Bak1	chr17	-	27022741	27022877	27022741	27022872	27025792	27025893	2367	529470506485	2320	556493480410	4000	55	50	1	1	0.996,0.993,0.996,1.0	0.992,1.0,1.0,1.0	-0.002	chr17:27022877-27025793(-)	chr17:27022872-27025793(-)
ENSMUSG00000028273	Pdlim5	chr3	-	142277816	142278001	142277816	142277998	142282968	142283112	2372	2230	10	1010	0	53	50	1	1	1.0,1.0,0.739,NA	1.0,NA,1.0,NA	-0.087	chr3:142278001-142282969(-)	chr3:142277998-142282969(-)
ENSMUSG00000028273	Pdlim5	chr3	-	142312122	142312541	142312122	142312214	142314405	142314448	2374	54365344	1111	47444056	100	100	50	0.342621	1	0.964,0.947,0.964,0.957	1.0,0.957,1.0,1.0	-0.031	chr3:142312541-142314406(-)	chr3:142312214-142314406(-)
ENSMUSG00000026049	Tex30	chr1	-	44099847	44100001	44099847	44099935	44101899	44101957	2376	101126142133	4452	129141116105	5532	100	50	0.957892	1	0.927,0.94,0.934,0.971	0.928,0.934,0.951,0.963	-0.001	chr1:44100001-44101900(-)	chr1:44099935-44101900(-)
ENSMUSG00000057363	Uxs1	chr1	-	43790463	43790644	43790463	43790550	43797244	43797305	2378	72606166	1111	78667360	1112	100	50	1	1	0.973,0.968,0.968,0.971	0.975,0.971,0.973,0.938	0.006	chr1:43790644-43797245(-)	chr1:43790550-43797245(-)
ENSMUSG00000057363	Uxs1	chr1	-	43805625	43805689	43805625	43805674	43807349	43807377	2379	1111105	55504449	99511	53474151	65	50	0.814722	1	0.133,0.145,0.149,0.073	0.116,0.128,0.086,0.142	0.007	chr1:43805689-43807350(-)	chr1:43805674-43807350(-)
ENSMUSG00000023977	Ubr2	chr17	-	46988652	46988896	46988652	46988783	46990991	46991105	2380	540	38344551	1122	41344138	100	50	0.361174	1	0.0,0.068,0.043,0.0	0.012,0.014,0.024,0.026	0.009	chr17:46988896-46990992(-)	chr17:46988783-46990992(-)
ENSMUSG00000029501	Ankle2	chr5	+	110237654	110237851	110237657	110237851	110236272	110236479	2381	60615856	131575	30556439	51089	53	50	0.790545	1	0.813,0.793,0.887,0.914	0.85,0.838,0.883,0.803	0.008	chr5:110236479-110237655(+)	chr5:110236479-110237658(+)
ENSMUSG00000026879	Gsn	chr2	+	35282650	35282721	35282659	35282721	35266819	35266903	2384	10	1	200	0	59	50	1	1	NA,NA,1.0,0.0	NA,1.0,NA,NA	-0.5	chr2:35266903-35282651(+)	chr2:35266903-35282660(+)
ENSMUSG00000052296	Ppp6r1	chr7	-	4641927	4642041	4641927	4642037	4642135	4642248	2385	672651708577	1211	642573610573	2222	54	50	1	1	0.998,0.997,0.998,0.998	0.997,0.996,0.996,0.996	0.002	chr7:4642041-4642136(-)	chr7:4642037-4642136(-)
ENSMUSG00000021302	Ggps1	chr13	-	14059318	14059457	14059318	14059450	14063205	14063413	2387	1903	3140	2439	3132	57	50	0.710327	1	0.226,0.888,0.0,1.0	0.369,0.778,0.467,0.798	-0.075	chr13:14059457-14063206(-)	chr13:14059450-14063206(-)
ENSMUSG00000025915	Sgk3	chr1	+	9885988	9886142	9886046	9886142	9885666	9885753	2393	161299	77857577	1712118	1099210290	100	50	0.460026	1	0.094,0.066,0.057,0.055	0.072,0.061,0.051,0.043	0.011	chr1:9885753-9885989(+)	chr1:9885753-9886047(+)
ENSMUSG00000006019	Dhx34	chr7	-	16217987	16219184	16217987	16218950	16221683	16221993	2394	2020	3300	3310	1001	100	50	1	1	0.25,0.0,1.0,NA	0.6,1.0,1.0,0.0	-0.233	chr7:16219184-16221684(-)	chr7:16218950-16221684(-)
ENSMUSG00000031959	Wdr59	chr8	-	111458922	111459049	111458922	111459046	111460582	111460655	2396	23141920	132	18362518	2422	53	50	0.291569	1	1.0,0.93,0.857,0.904	0.895,0.895,0.922,0.895	0.021	chr8:111459049-111460583(-)	chr8:111459046-111460583(-)
ENSMUSG00000030598	Fbxo17	chr7	+	28737338	28738144	28737664	28738144	28736067	28736203	2400	2587	111055	4561	4647	100	50	0.966666	1	0.083,0.2,0.444,0.412	0.333,0.294,0.429,0.067	0.004	chr7:28736203-28737339(+)	chr7:28736203-28737665(+)
ENSMUSG00000063652	Slc22a21	chr11	-	53960282	53960621	53960282	53960437	53969499	53969603	2401	3222	1010	2401	20	100	50	0.453209	1	0.6,1.0,0.5,1.0	1.0,1.0,0.0,1.0	0.025	chr11:53960621-53969500(-)	chr11:53960437-53969500(-)
ENSMUSG00000031010	Usp9x	chrX	+	13116608	13116757	13116623	13116757	13114507	13114644	2403	31212233	21171822	21252619	18121514	65	50	0.59764	1	0.532,0.487,0.485,0.536	0.473,0.616,0.571,0.511	-0.033	chrX:13114644-13116609(+)	chrX:13114644-13116624(+)
ENSMUSG00000043065	Spice1	chr16	+	44357743	44357903	44357759	44357903	44356144	44356192	2405	1000	12162817	101	14161516	66	50	1	1	0.059,0.0,0.0,0.0	0.0,0.045,0.0,0.045	-0.008	chr16:44356192-44357744(+)	chr16:44356192-44357760(+)
ENSMUSG00000022210	Dhrs4	chr14	+	55487092	55487571	55487259	55487571	55486116	55486218	2406	152203225151	4202	108171136167	220	100	50	0.760957	1	0.95,0.981,1.0,0.974	1.0,0.977,0.971,1.0	-0.011	chr14:55486218-55487093(+)	chr14:55486218-55487260(+)
ENSMUSG00000028786	Tmem54	chr4	+	129111238	129111626	129111322	129111626	129110812	129110947	2407	200	0	10	1300	100	50	1	1	NA,1.0,NA,NA	0.0,0.0,1.0,NA	0.667	chr4:129110947-129111239(+)	chr4:129110947-129111323(+)
ENSMUSG00000039242	B3galnt2	chr13	+	13991368	13991552	13991409	13991552	13990788	13990867	2410	126104183142	6125	110172139131	4795	91	50	0.9698	1	1.0,0.905,0.893,0.94	0.938,0.931,0.895,0.935	0.01	chr13:13990867-13991369(+)	chr13:13990867-13991410(+)
ENSMUSG00000045751	Mms22l	chr4	+	24580050	24580202	24580053	24580202	24578752	24578903	2414	11111312	17142026	1415614	24252421	53	50	0.567634	1	0.379,0.426,0.38,0.303	0.355,0.361,0.191,0.386	0.049	chr4:24578903-24580051(+)	chr4:24578903-24580054(+)
ENSMUSG00000070565	Rasal2	chr1	-	157158658	157158858	157158658	157158837	157161124	157161326	2415	313	201	3112	1025	71	50	1	1	NA,0.514,1.0,0.679	0.679,1.0,0.26,0.22	0.191	chr1:157158858-157161125(-)	chr1:157158837-157161125(-)
ENSMUSG00000032803	Cdv3	chr9	-	103353103	103356029	103353103	103355313	103356279	103356439	2416	139134200163	24213127	123133116118	42595641	100	50	2.09834e-09	5.9248e-07	0.743,0.761,0.763,0.751	0.594,0.53,0.509,0.59	0.199	chr9:103356029-103356280(-)	chr9:103355313-103356280(-)
ENSMUSG00000032803	Cdv3	chr9	-	103356279	103356439	103356279	103356433	103359875	103360018	2418	768090100	7161210	74777467	20102013	56	50	0.0228031	0.259772	0.906,0.817,0.87,0.899	0.768,0.873,0.768,0.821	0.066	chr9:103356439-103359876(-)	chr9:103356433-103359876(-)
ENSMUSG00000007050	Lsm2	chr17	+	34984979	34985139	34985108	34985139	34982619	34982687	2421	1322	242244320242	1725	247288255210	100	50	1	1	0.002,0.006,0.003,0.004	0.002,0.012,0.004,0.012	-0.004	chr17:34982687-34984980(+)	chr17:34982687-34985109(+)
ENSMUSG00000038056	Kmt2c	chr5	-	25374489	25374567	25374489	25374564	25375341	25375455	2425	138176	1	6876	2000	53	50	1	1	1.0,1.0,1.0,0.85	0.739,1.0,1.0,1.0	0.028	chr5:25374567-25375342(-)	chr5:25374564-25375342(-)
ENSMUSG00000026159	Agfg1	chr1	+	82883180	82883361	82883243	82883361	82882227	82882437	2428	127113185122	41143	155150166152	53105	100	50	0.829371	1	0.941,0.837,0.959,0.953	0.939,0.962,0.892,0.938	-0.01	chr1:82882437-82883181(+)	chr1:82882437-82883244(+)
ENSMUSG00000026159	Agfg1	chr1	+	82894475	82894567	82894481	82894567	82893423	82893582	2429	51577042	10191317	72455852	14171117	56	50	0.908531	1	0.82,0.728,0.828,0.688	0.821,0.703,0.825,0.732	-0.004	chr1:82893582-82894476(+)	chr1:82893582-82894482(+)
ENSMUSG00000037722	Gnpnat1	chr14	-	45380936	45381016	45380936	45380998	45381555	45381683	2430	1611	54665755	2	68896348	68	50	0.398717	1	0.013,0.063,0.013,0.013	0.0,0.0,0.0,0.03	0.018	chr14:45381016-45381556(-)	chr14:45380998-45381556(-)
ENSMUSG00000006289	Osgep	chr14	-	50919615	50919819	50919615	50919791	50919929	50920049	2435	69138	141142158114	12111211	120133102114	78	50	0.0804465	0.556064	0.027,0.039,0.05,0.043	0.06,0.05,0.07,0.058	-0.02	chr14:50919819-50919930(-)	chr14:50919791-50919930(-)
ENSMUSG00000038712	Mindy1	chr3	+	95282919	95283625	95283230	95283625	95282682	95282744	2436	25393927	913812	30311140	6733	100	50	0.0414887	0.383712	0.581,0.6,0.709,0.529	0.714,0.689,0.647,0.87	-0.125	chr3:95282744-95282920(+)	chr3:95282744-95283231(+)
ENSMUSG00000038712	Mindy1	chr3	+	95295272	95295425	95295299	95295425	95294794	95294986	2437	59507474	14241011	75847045	155911	77	50	0.118412	0.683332	0.732,0.575,0.828,0.814	0.765,0.916,0.835,0.727	-0.074	chr3:95294986-95295273(+)	chr3:95294986-95295300(+)
ENSMUSG00000020827	Mink1	chr11	+	70605949	70606164	70606047	70606164	70604994	70605205	2440	2305	35273334	2002	26442929	100	50	0.0762048	0.544734	0.028,0.053,0.0,0.068	0.037,0.0,0.0,0.033	0.02	chr11:70605205-70605950(+)	chr11:70605205-70606048(+)
ENSMUSG00000020827	Mink1	chr11	+	70610077	70610183	70610080	70610183	70609553	70609717	2441	24304040	4011	24473329	1122	53	50	0.52995	1	0.85,1.0,0.974,0.974	0.958,0.978,0.94,0.932	-0.002	chr11:70609717-70610078(+)	chr11:70609717-70610081(+)
ENSMUSG00000026283	Ing5	chr1	+	93811764	93811948	93811781	93811948	93806047	93806119	2443	0	31173830	211	26333418	67	50	1	1	0.0,0.0,0.0,0.0	0.0,0.043,0.021,0.04	-0.026	chr1:93806119-93811765(+)	chr1:93806119-93811782(+)
ENSMUSG00000026222	Sp100	chr1	+	85674654	85675266	85675194	85675266	85673624	85673771	2445	9424	146140113108	8434	10213510787	100	50	0.664312	1	0.03,0.014,0.009,0.018	0.038,0.015,0.014,0.022	-0.005	chr1:85673771-85674655(+)	chr1:85673771-85675195(+)
ENSMUSG00000053291	Rab4b	chr7	-	27174715	27174840	27174715	27174778	27175778	27175893	2448	2531	128141128117	1862	16512712398	100	50	0.521168	1	0.008,0.017,0.012,0.004	0.003,0.031,0.024,0.01	-0.007	chr7:27174840-27175779(-)	chr7:27174778-27175779(-)
ENSMUSG00000038975	Rabggtb	chr3	-	153908789	153908915	153908789	153908899	153909348	153909459	2449	119147152116	48688068	142169140140	47793741	66	50	0.0083321	0.134232	0.653,0.621,0.59,0.564	0.696,0.618,0.741,0.721	-0.087	chr3:153908915-153909349(-)	chr3:153908899-153909349(-)
ENSMUSG00000038975	Rabggtb	chr3	-	153910260	153910366	153910260	153910326	153910690	153910888	2451	195201190183	2101	162253188187	100	90	50	1	1	0.982,0.991,1.0,0.99	1.0,0.993,1.0,1.0	-0.007	chr3:153910366-153910691(-)	chr3:153910326-153910691(-)
ENSMUSG00000031626	Sorbs2	chr8	+	45823728	45823835	45823758	45823835	45819718	45819768	2453	1010	0	10	10	80	50	1	1	1.0,NA,1.0,NA	NA,NA,0.385,NA	0.615	chr8:45819768-45823729(+)	chr8:45819768-45823759(+)
ENSMUSG00000036036	Zfp57	chr17	+	37006049	37006194	37006058	37006194	37004796	37004903	2454	412	10	1011	0	59	50	1	1	NA,1.0,0.459,1.0	1.0,NA,1.0,1.0	-0.18	chr17:37004903-37006050(+)	chr17:37004903-37006059(+)
ENSMUSG00000052593	Adam17	chr12	-	21329053	21329155	21329053	21329132	21330032	21330163	2455	6230	828310089	2201	93866881	73	50	0.579663	1	0.048,0.016,0.02,0.0	0.015,0.016,0.0,0.008	0.011	chr12:21329155-21330033(-)	chr12:21329132-21330033(-)
ENSMUSG00000052593	Adam17	chr12	-	21347296	21347449	21347296	21347430	21349784	21349953	2456	48104	71486975	17127	63747464	69	50	0.740593	1	0.039,0.108,0.095,0.037	0.011,0.064,0.105,0.073	0.006	chr12:21347449-21349785(-)	chr12:21347430-21349785(-)
ENSMUSG00000026280	Atg4b	chr1	+	93775627	93778364	93778284	93778364	93775132	93775234	2457	134134145129	2002	108141146138	1310	100	50	1	1	0.971,1.0,1.0,0.97	0.982,0.959,0.986,1.0	0.004	chr1:93775234-93775628(+)	chr1:93775234-93778285(+)
ENSMUSG00000039183	Nubp2	chr17	-	24882616	24883409	24882616	24883314	24883805	24883875	2458	9141110	276281282276	1415137	260263267268	100	50	0.478505	1	0.016,0.024,0.019,0.018	0.026,0.028,0.024,0.013	-0.003	chr17:24883409-24883806(-)	chr17:24883314-24883806(-)
ENSMUSG00000039183	Nubp2	chr17	-	24883805	24883889	24883805	24883875	24884124	24884235	2459	3302	232224255246	102	227240222212	64	50	1	1	0.01,0.01,0.0,0.006	0.0,0.003,0.0,0.007	0.004	chr17:24883889-24884125(-)	chr17:24883875-24884125(-)
ENSMUSG00000039183	Nubp2	chr17	-	24884400	24884514	24884400	24884483	24885418	24885617	2460	258246304250	330	240243237231	5020	81	50	1	1	1.0,0.981,0.984,1.0	0.967,1.0,0.987,1.0	0.003	chr17:24884514-24885419(-)	chr17:24884483-24885419(-)
ENSMUSG00000039183	Nubp2	chr17	-	24884400	24884555	24884400	24884483	24885418	24885617	2461	658600747603	330	596624599515	5020	100	50	1	1	1.0,0.99,0.992,1.0	0.983,1.0,0.993,1.0	0.002	chr17:24884555-24885419(-)	chr17:24884483-24885419(-)
ENSMUSG00000039183	Nubp2	chr17	-	24884400	24884586	24884400	24884483	24885418	24885617	2462	384374465356	330	335365356325	5020	100	50	1	1	1.0,0.984,0.987,1.0	0.971,1.0,0.989,1.0	0.003	chr17:24884586-24885419(-)	chr17:24884483-24885419(-)
ENSMUSG00000039183	Nubp2	chr17	-	24884400	24884555	24884400	24884514	24885418	24885617	2463	547480577468	21	461501475404	30	91	50	1	1	1.0,1.0,0.994,0.996	1.0,1.0,0.989,1.0	0	chr17:24884555-24885419(-)	chr17:24884514-24885419(-)
ENSMUSG00000039183	Nubp2	chr17	-	24884400	24884586	24884400	24884514	24885418	24885617	2464	278257297221	21	200244237214	30	100	50	1	1	1.0,1.0,0.987,0.991	1.0,1.0,0.975,1.0	0.001	chr17:24884586-24885419(-)	chr17:24884514-24885419(-)
ENSMUSG00000039183	Nubp2	chr17	-	24884400	24884586	24884400	24884555	24885418	24885617	2465	131796	274230283247	612113	263261243190	81	50	0.241069	1	0.028,0.044,0.019,0.015	0.014,0.028,0.027,0.01	0.007	chr17:24884586-24885419(-)	chr17:24884555-24885419(-)
ENSMUSG00000039183	Nubp2	chr17	-	24885418	24885634	24885418	24885617	24885718	24885837	2466	1213118	249229304264	17888	209236231228	67	50	0.79743	1	0.035,0.041,0.026,0.022	0.057,0.025,0.025,0.026	-0.002	chr17:24885634-24885719(-)	chr17:24885617-24885719(-)
ENSMUSG00000037936	Scarb1	chr5	-	125283898	125284064	125283898	125284045	125284680	125284732	2467	3165	249234217176	4233	196205190185	69	50	0.93339	1	0.009,0.003,0.02,0.02	0.015,0.007,0.011,0.012	0.002	chr5:125284064-125284681(-)	chr5:125284045-125284681(-)
ENSMUSG00000026333	Gin1	chr1	+	97782926	97783232	97783193	97783232	97777325	97777519	2469	14121515	1603	1914177	4111	100	50	0.544475	1	0.875,0.5,1.0,0.714	0.704,0.875,0.895,0.778	-0.041	chr1:97777519-97782927(+)	chr1:97777519-97783194(+)
ENSMUSG00000027018	Hat1	chr2	+	71434033	71434206	71434054	71434206	71421632	71421739	2473	17181519	268251306229	10121614	285289237266	71	50	0.118309	0.683332	0.043,0.048,0.033,0.055	0.024,0.028,0.045,0.036	0.011	chr2:71421739-71434034(+)	chr2:71421739-71434055(+)
ENSMUSG00000038838	Vars2	chr17	-	35660403	35660597	35660403	35660509	35660723	35660799	2474	11	65776874	2412	47505462	100	50	0.678988	1	0.0,0.0,0.007,0.007	0.021,0.038,0.009,0.016	-0.017	chr17:35660597-35660724(-)	chr17:35660509-35660724(-)
ENSMUSG00000055692	Tmem191c	chr16	+	17276961	17277250	17277193	17277250	17276633	17276887	2475	1211146	1	20776	1	100	50	1	1	1.0,1.0,1.0,0.75	1.0,1.0,1.0,0.75	0	chr16:17276887-17276962(+)	chr16:17276887-17277194(+)
ENSMUSG00000033022	Cdo1	chr18	-	46715596	46715815	46715596	46715766	46720286	46720441	2476	0	3101	1000	1000	99	50	1	1	0.0,0.0,NA,0.0	0.336,NA,NA,NA	-0.336	chr18:46715815-46720287(-)	chr18:46715766-46720287(-)
ENSMUSG00000033022	Cdo1	chr18	-	46720286	46720441	46720286	46720438	46723317	46723395	2479	1	10	1021	0	53	50	1	1	NA,NA,0.0,1.0	1.0,NA,1.0,1.0	-0.5	chr18:46720441-46723318(-)	chr18:46720438-46723318(-)
ENSMUSG00000026632	Tatdn3	chr1	-	191049281	191049362	191049281	191049359	191052859	191052972	2480	9344	13737	3126	7641	53	50	0.906961	1	0.395,0.288,0.557,0.35	0.288,0.136,0.321,0.85	-0.001	chr1:191049362-191052860(-)	chr1:191049359-191052860(-)
ENSMUSG00000029034	Ints11	chr4	+	155875137	155875366	155875228	155875366	155872849	155872923	2482	293207361278	9111113	216298255224	4979	100	50	0.212516	0.951388	0.942,0.904,0.943,0.914	0.964,0.943,0.948,0.926	-0.019	chr4:155872923-155875138(+)	chr4:155872923-155875229(+)
ENSMUSG00000029034	Ints11	chr4	+	155885097	155885196	155885163	155885196	155875137	155875366	2483	227155251193	10	175237182212	100	100	50	1	1	1.0,1.0,0.992,1.0	1.0,0.992,1.0,1.0	0	chr4:155875366-155885098(+)	chr4:155875366-155885164(+)
ENSMUSG00000044320	1700001O22Rik	chr2	-	30796108	30796283	30796108	30796211	30796400	30796566	2485	1201	0	2033	1	100	50	1	1	1.0,1.0,NA,1.0	1.0,NA,1.0,0.6	0.133	chr2:30796283-30796401(-)	chr2:30796211-30796401(-)
ENSMUSG00000112148	Lilrb4a	chr10	+	51491433	51492163	51491960	51492163	51491196	51491232	2488	4411	2000	5395	3000	100	50	0.644313	1	0.5,1.0,1.0,1.0	0.455,1.0,1.0,1.0	0.011	chr10:51491232-51491434(+)	chr10:51491232-51491961(+)
ENSMUSG00000112148	Lilrb4a	chr10	+	51491860	51492163	51491960	51492163	51491196	51491232	2489	3411	2000	5243	3000	100	50	0.730226	1	0.429,1.0,1.0,1.0	0.455,1.0,1.0,1.0	-0.006	chr10:51491232-51491861(+)	chr10:51491232-51491961(+)
ENSMUSG00000112148	Lilrb4a	chr10	+	51494721	51494845	51494792	51494845	51493169	51494178	2490	101	202	1111	3301	100	50	1	1	NA,0.2,NA,0.2	0.143,0.143,1.0,0.333	-0.205	chr10:51494178-51494722(+)	chr10:51494178-51494793(+)
ENSMUSG00000043909	Trp53bp1	chr2	-	121202542	121202758	121202542	121202752	121204332	121204548	2491	47282937	4111	37374635	111	56	50	1	1	0.913,0.962,0.963,0.971	1.0,0.971,0.976,0.969	-0.027	chr2:121202758-121204333(-)	chr2:121202752-121204333(-)
ENSMUSG00000034563	Ccpg1	chr9	+	73005640	73005892	73005654	73005892	73001676	73001875	2492	65485637	4101	71603258	3011	64	50	0.612667	1	0.927,0.974,1.0,0.967	0.949,1.0,0.962,0.978	-0.005	chr9:73001875-73005641(+)	chr9:73001875-73005655(+)
ENSMUSG00000111258	Gm34397	chr9	-	100389093	100389192	100389093	100389188	100389453	100389523	2500	2001	0	0	100	54	50	1	1	1.0,NA,NA,1.0	NA,0.0,NA,NA	1	chr9:100389192-100389454(-)	chr9:100389188-100389454(-)
ENSMUSG00000026988	Wdsub1	chr2	-	59861560	59861740	59861560	59861737	59862619	59862726	2501	28212324	1013148	21272024	421711	53	50	0.836551	1	0.725,0.604,0.608,0.739	0.832,0.548,0.729,0.673	-0.027	chr2:59861740-59862620(-)	chr2:59861737-59862620(-)
ENSMUSG00000003573	Homer3	chr8	+	70291516	70291603	70291525	70291603	70291317	70291428	2503	46557538	4975	30403030	4531	59	50	0.424681	1	0.907,0.838,0.901,0.866	0.864,0.871,0.894,0.962	-0.02	chr8:70291428-70291517(+)	chr8:70291428-70291526(+)
ENSMUSG00000030682	Cdipt	chr7	+	126978865	126978996	126978914	126978996	126978261	126978415	2506	9221613	123112144102	691411	84109112104	99	50	0.23475	1	0.036,0.09,0.053,0.06	0.035,0.04,0.059,0.051	0.013	chr7:126978415-126978866(+)	chr7:126978415-126978915(+)
ENSMUSG00000030682	Cdipt	chr7	+	126979257	126979403	126979304	126979403	126978914	126978996	2507	3313	0	3143	211	97	50	0.368859	1	1.0,1.0,1.0,1.0	1.0,0.205,0.673,0.607	0.379	chr7:126978996-126979258(+)	chr7:126978996-126979305(+)
ENSMUSG00000030682	Cdipt	chr7	+	126979257	126979403	126979321	126979403	126978914	126978996	2508	10626	138109130122	10476	13111195132	100	50	0.537855	1	0.035,0.027,0.008,0.024	0.037,0.018,0.036,0.022	-0.005	chr7:126978996-126979258(+)	chr7:126978996-126979322(+)
ENSMUSG00000030682	Cdipt	chr7	+	126979304	126979403	126979321	126979403	126978914	126978996	2509	9324	138109130122	7555	13111195132	67	50	0.399062	1	0.046,0.02,0.011,0.024	0.038,0.033,0.038,0.027	-0.009	chr7:126978996-126979305(+)	chr7:126978996-126979322(+)
ENSMUSG00000052331	Ankrd44	chr1	-	54734995	54735113	54734995	54735059	54736229	54736312	2510	0	43373335	2223	44453030	100	50	0.382969	1	0.0,0.0,0.0,0.0	0.022,0.022,0.032,0.048	-0.031	chr1:54735113-54736230(-)	chr1:54735059-54736230(-)
ENSMUSG00000042498	D330045A20Rik	chrX	+	139513142	139513307	139513145	139513307	139511544	139511649	2511	2210	1202	200	0	53	50	1	1	0.654,0.485,1.0,0.0	NA,1.0,NA,NA	-0.465	chrX:139511649-139513143(+)	chrX:139511649-139513146(+)
ENSMUSG00000038943	Prc1	chr7	+	80313526	80313568	80313529	80313568	80313031	80313208	2515	11191721	100	15231330	1001	53	50	1	1	1.0,0.947,1.0,1.0	0.934,1.0,1.0,0.966	0.012	chr7:80313208-80313527(+)	chr7:80313208-80313530(+)
ENSMUSG00000044005	Gls2	chr10	+	128200143	128200302	128200172	128200302	128199636	128199758	2516	100	61103	0	3973	79	50	1	1	0.0,0.388,0.0,0.0	0.0,0.0,0.0,0.0	0.097	chr10:128199758-128200144(+)	chr10:128199758-128200173(+)
ENSMUSG00000005882	Uqcc1	chr2	-	155910356	155910467	155910356	155910464	155911740	155911836	2518	481113	1049413098	8756	1161089882	53	50	0.282184	1	0.035,0.074,0.074,0.111	0.061,0.058,0.046,0.065	0.016	chr2:155910467-155911741(-)	chr2:155910464-155911741(-)
ENSMUSG00000005882	Uqcc1	chr2	-	155910356	155911836	155910356	155910464	155921634	155921727	2519	70719381	10	90766862	0	100	50	1	1	1.0,1.0,0.979,1.0	1.0,1.0,1.0,1.0	-0.005	chr2:155911836-155921635(-)	chr2:155910464-155921635(-)
ENSMUSG00000005882	Uqcc1	chr2	-	155921634	155921727	155921634	155921725	155930012	155930060	2520	104105110114	2101	11510311190	2200	52	50	1	1	0.98,0.99,1.0,0.991	0.982,0.98,1.0,1.0	0	chr2:155921727-155930013(-)	chr2:155921725-155930013(-)
ENSMUSG00000033228	Scaf11	chr15	-	96415031	96415151	96415031	96415149	96415776	96415947	2521	53577781	100	57574649	0	52	50	1	1	1.0,0.982,1.0,1.0	1.0,1.0,1.0,1.0	-0.004	chr15:96415151-96415777(-)	chr15:96415149-96415777(-)
ENSMUSG00000036712	Cyld	chr8	+	88719288	88719396	88719297	88719396	88709890	88709996	2523	4733	53463851	3233	49496245	59	50	0.143672	0.772702	0.06,0.114,0.063,0.047	0.049,0.033,0.039,0.053	0.027	chr8:88709996-88719289(+)	chr8:88709996-88719298(+)
ENSMUSG00000029022	Miip	chr4	-	147860790	147861085	147860790	147861013	147861353	147861491	2524	143139140124	3636	98129121105	51522	100	50	0.171546	0.855136	0.96,0.921,0.959,0.912	0.907,0.811,0.968,0.963	0.026	chr4:147861085-147861354(-)	chr4:147861013-147861354(-)
ENSMUSG00000026203	Dnajb2	chr1	+	75239107	75239333	75239279	75239333	75237454	75237564	2525	220	1271711	310	822911	100	50	1	1	0.0,0.125,0.056,0.0	0.0,0.064,0.053,0.0	0.016	chr1:75237564-75239108(+)	chr1:75237564-75239280(+)
ENSMUSG00000041757	Plekha6	chr1	+	133269999	133270202	133270059	133270202	133266565	133266666	2526	1751	0	2971	1011	100	50	1	1	1.0,1.0,1.0,1.0	0.5,1.0,0.778,0.333	0.347	chr1:133266666-133270000(+)	chr1:133266666-133270060(+)
ENSMUSG00000022440	C1qtnf6	chr15	-	78523345	78525398	78523345	78525187	78527227	78527468	2528	57548065	5541	56415038	2103	100	50	0.0570793	0.460478	0.851,0.844,0.909,0.97	0.933,0.953,1.0,0.864	-0.044	chr15:78525398-78527228(-)	chr15:78525187-78527228(-)
ENSMUSG00000043262	Uevld	chr7	-	46940132	46940303	46940132	46940277	46943787	46943890	2530	8349	2642	88137	421	76	50	0.0269206	0.289965	0.725,0.248,0.397,0.748	1.0,0.568,0.81,0.822	-0.27	chr7:46940303-46943788(-)	chr7:46940277-46943788(-)
ENSMUSG00000038822	Hace1	chr10	+	45700953	45701024	45701010	45701024	45700576	45700675	2531	45395131	1010	29494147	201	100	50	1	1	0.957,1.0,0.962,1.0	1.0,0.925,1.0,0.959	0.009	chr10:45700675-45700954(+)	chr10:45700675-45701011(+)
ENSMUSG00000073643	Wdfy1	chr1	-	79707451	79707582	79707451	79707571	79709092	79709194	2536	83166768	6126	13545825	1231	61	50	0.221552	0.974188	0.919,0.929,0.965,0.903	0.914,0.957,0.941,0.953	-0.012	chr1:79707582-79709093(-)	chr1:79707571-79709093(-)
ENSMUSG00000028464	Tpm2	chr4	-	43514710	43516003	43514710	43514861	43518229	43518299	2538	100	4584	510	8745	100	50	0.125801	0.708394	0.0,0.091,0.0,0.0	0.0,0.263,0.111,0.0	-0.071	chr4:43516003-43518230(-)	chr4:43514861-43518230(-)
ENSMUSG00000001034	Mapk7	chr11	-	61492903	61493069	61492903	61493061	61493523	61493954	2539	6361	0	1345	100	58	50	1	1	1.0,1.0,1.0,1.0	1.0,0.721,1.0,1.0	0.07	chr11:61493069-61493524(-)	chr11:61493061-61493524(-)
ENSMUSG00000001034	Mapk7	chr11	-	61492903	61493185	61492903	61493069	61493523	61494266	2540	2400	3120	4422	1211	100	50	1	1	0.25,0.667,0.0,NA	0.667,0.5,0.5,0.5	-0.236	chr11:61493185-61493524(-)	chr11:61493069-61493524(-)
ENSMUSG00000001034	Mapk7	chr11	-	61492903	61493069	61492903	61493061	61493646	61494266	2542	922138	1000	519814	0	58	50	1	1	0.886,1.0,1.0,1.0	1.0,1.0,1.0,1.0	-0.028	chr11:61493069-61493647(-)	chr11:61493061-61493647(-)
ENSMUSG00000056608	Chd9	chr8	+	91034904	91035065	91034907	91035065	91033338	91034244	2546	27213228	74412	24301620	4548	53	50	0.831376	1	0.784,0.832,0.883,0.688	0.85,0.85,0.791,0.702	-0.001	chr8:91034244-91034905(+)	chr8:91034244-91034908(+)
ENSMUSG00000028099	Polr3c	chr3	-	96716666	96716805	96716666	96716747	96719233	96719326	2547	914911	99111119128	111278	117948971	100	50	0.785717	1	0.043,0.059,0.036,0.041	0.045,0.06,0.038,0.053	-0.004	chr3:96716805-96719234(-)	chr3:96716747-96719234(-)
ENSMUSG00000051396	Gm45902	chr2	-	3508292	3509095	3508292	3509020	3511014	3511097	2551	14423	3300	6257	3143	100	50	0.0796261	0.554819	0.7,0.4,1.0,1.0	0.5,0.5,0.385,0.538	0.294	chr2:3509095-3511015(-)	chr2:3509020-3511015(-)
ENSMUSG00000055725	Paqr3	chr5	-	97099545	97099743	97099545	97099680	97103359	97103515	2559	4585	0	6774	11	100	50	1	1	1.0,1.0,1.0,1.0	1.0,1.0,0.778,0.667	0.139	chr5:97099743-97103360(-)	chr5:97099680-97103360(-)
ENSMUSG00000079487	Med12	chrX	+	101293936	101294012	101293957	101294012	101293792	101293870	2560	5135	49385053	2214	37413442	71	50	0.422371	1	0.067,0.018,0.041,0.062	0.037,0.033,0.02,0.063	0.009	chrX:101293870-101293937(+)	chrX:101293870-101293958(+)
ENSMUSG00000079487	Med12	chrX	+	101296592	101296733	101296616	101296733	101295841	101296088	2561	949910479	1000	72906884	1	74	50	1	1	0.984,1.0,1.0,1.0	1.0,1.0,1.0,0.983	0	chrX:101296088-101296593(+)	chrX:101296088-101296617(+)
ENSMUSG00000027327	1700037H04Rik	chr2	-	131151617	131151760	131151617	131151756	131153593	131153710	2562	251261279245	442	239219205194	4233	54	50	0.687351	1	1.0,0.984,0.985,0.991	0.982,0.99,0.984,0.984	0.005	chr2:131151760-131153594(-)	chr2:131151756-131153594(-)
ENSMUSG00000037544	Dlgap5	chr14	-	47405774	47405901	47405774	47405865	47406338	47406418	2564	57565759	22242424	77725867	410137	86	50	3.3228e-07	5.25402e-05	0.601,0.576,0.58,0.588	0.918,0.807,0.722,0.848	-0.237	chr14:47405901-47406339(-)	chr14:47405865-47406339(-)
ENSMUSG00000006498	Ptbp1	chr10	+	79858951	79859271	79859071	79859271	79858751	79858824	2565	2156198321891961	1034	1862196318181710	5247	100	50	1	1	0.999,1.0,0.997,0.996	0.995,0.998,0.996,0.992	0.003	chr10:79858824-79858952(+)	chr10:79858824-79859072(+)
ENSMUSG00000006498	Ptbp1	chr10	+	79859071	79859271	79859088	79859271	79858951	79858981	2566	478404465369	2791511	377439407385	16131312	67	50	0.747429	1	0.93,0.971,0.959,0.962	0.946,0.962,0.959,0.96	-0.001	chr10:79858981-79859072(+)	chr10:79858981-79859089(+)
ENSMUSG00000031256	Cstf2	chrX	+	134073135	134073277	134073213	134073277	134069844	134069907	2568	189194234166	1512279	159193178176	21231020	100	50	0.16627	0.843727	0.863,0.89,0.812,0.902	0.791,0.808,0.899,0.815	0.039	chrX:134069907-134073136(+)	chrX:134069907-134073214(+)
ENSMUSG00000026956	Uap1l1	chr2	-	25363805	25363999	25363805	25363829	25364100	25364273	2571	270239219242	101	252198222184	0	100	50	1	1	1.0,0.992,1.0,0.992	1.0,1.0,1.0,1.0	-0.004	chr2:25363999-25364101(-)	chr2:25363829-25364101(-)
ENSMUSG00000039449	Prpf18	chr2	-	4643650	4643784	4643650	4643764	4645568	4645673	2572	4516	76626662	86134	69705743	70	50	0.00961841	0.146237	0.036,0.054,0.011,0.065	0.076,0.058,0.14,0.062	-0.043	chr2:4643784-4645569(-)	chr2:4643764-4645569(-)
ENSMUSG00000027597	Ahcy	chr2	-	155067322	155067398	155067322	155067362	155068827	155069018	2573	161165168194	1201	158140152155	1100	86	50	1	1	0.989,0.98,1.0,0.991	0.989,0.988,1.0,1.0	-0.004	chr2:155067398-155068828(-)	chr2:155067362-155068828(-)
ENSMUSG00000004591	Pkn2	chr3	-	142810360	142810487	142810360	142810434	142810690	142810865	2580	76617675	1200	74716064	20	100	50	1	1	0.974,0.938,1.0,1.0	1.0,1.0,0.938,1.0	-0.006	chr3:142810487-142810691(-)	chr3:142810434-142810691(-)
ENSMUSG00000037364	Srrt	chr5	-	137295986	137296113	137295986	137296092	137296217	137296307	2582	220277211217	155121166128	260258252251	979794100	71	50	0.00014865	0.00668289	0.5,0.617,0.472,0.544	0.654,0.652,0.654,0.639	-0.117	chr5:137296113-137296218(-)	chr5:137296092-137296218(-)
ENSMUSG00000037364	Srrt	chr5	-	137296217	137296319	137296217	137296307	137296466	137296623	2583	482462528457	104518860	382463444430	56615257	62	50	0.157368	0.815304	0.789,0.88,0.829,0.86	0.846,0.86,0.873,0.859	-0.02	chr5:137296319-137296467(-)	chr5:137296307-137296467(-)
ENSMUSG00000037364	Srrt	chr5	-	137298725	137298883	137298725	137298880	137299557	137299672	2584	376319385352	121288	308341319306	81486	53	50	0.93083	1	0.967,0.962,0.978,0.976	0.973,0.958,0.974,0.98	-0.001	chr5:137298883-137299558(-)	chr5:137298880-137299558(-)
ENSMUSG00000057110	Cntrl	chr2	+	35147231	35147411	35147234	35147411	35145056	35145236	2586	65565550	3204	68744549	34115	53	50	0.00787052	0.129283	0.953,0.964,1.0,0.922	0.955,0.946,0.794,0.902	0.06	chr2:35145236-35147232(+)	chr2:35145236-35147235(+)
ENSMUSG00000043241	Upf2	chr2	+	6040108	6040210	6040111	6040210	6034111	6034251	2587	47405154	0	30424129	100	53	50	1	1	1.0,1.0,1.0,1.0	1.0,0.975,1.0,1.0	0.006	chr2:6034251-6040109(+)	chr2:6034251-6040112(+)
ENSMUSG00000043241	Upf2	chr2	+	6046897	6047065	6046900	6047065	6040462	6040561	2588	37274830	11955	27333432	12679	53	50	0.426267	1	0.76,0.739,0.901,0.85	0.68,0.838,0.821,0.77	0.035	chr2:6040561-6046898(+)	chr2:6040561-6046901(+)
ENSMUSG00000030271	Ogg1	chr6	+	113329145	113329408	113329228	113329408	113328364	113328612	2590	13141110	44453637	1515129	32272221	100	50	0.0374843	0.364067	0.129,0.135,0.133,0.119	0.19,0.217,0.214,0.176	-0.07	chr6:113328612-113329146(+)	chr6:113328612-113329229(+)
ENSMUSG00000030271	Ogg1	chr6	+	113329145	113329408	113329335	113329408	113328364	113328612	2591	38506948	0	55386247	1000	100	50	1	1	1.0,1.0,1.0,1.0	0.965,1.0,1.0,1.0	0.009	chr6:113328612-113329146(+)	chr6:113328612-113329336(+)
ENSMUSG00000030271	Ogg1	chr6	+	113329228	113329408	113329335	113329408	113328364	113328612	2592	778910281	0	78578064	1000	100	50	1	1	1.0,1.0,1.0,1.0	0.975,1.0,1.0,1.0	0.006	chr6:113328612-113329229(+)	chr6:113328612-113329336(+)
ENSMUSG00000026553	Copa	chr1	+	172110649	172110815	172110676	172110815	172110488	172110574	2600	18111711	338203335261	712188	284248264247	77	50	0.460504	1	0.033,0.034,0.032,0.027	0.016,0.03,0.042,0.021	0.004	chr1:172110574-172110650(+)	chr1:172110574-172110677(+)
ENSMUSG00000020368	Canx	chr11	-	50311603	50311784	50311603	50311780	50325492	50325673	2602	688512738558	15151615	583570515516	10768	54	50	0.0111366	0.155559	0.977,0.969,0.977,0.972	0.982,0.987,0.988,0.984	-0.011	chr11:50311784-50325493(-)	chr11:50311780-50325493(-)
ENSMUSG00000035585	Tsen34	chr7	+	3700527	3701004	3700614	3701004	3695351	3695621	2606	107116139124	1000	96988287	0	100	50	1	1	0.982,1.0,1.0,1.0	1.0,1.0,1.0,1.0	-0.004	chr7:3695621-3700528(+)	chr7:3695621-3700615(+)
ENSMUSG00000045482	Trrap	chr5	+	144791270	144791368	144791273	144791368	144790820	144791187	2607	20211717	4636	18161319	5287	53	50	0.512101	1	0.825,0.768,0.842,0.728	0.773,0.883,0.605,0.719	0.046	chr5:144791187-144791271(+)	chr5:144791187-144791274(+)
ENSMUSG00000045482	Trrap	chr5	+	144845414	144845614	144845468	144845614	144844198	144844289	2608	1047211487	5474	87857784	2141	100	50	0.0166355	0.213507	0.912,0.9,0.891,0.916	0.956,0.977,0.906,0.977	-0.049	chr5:144844289-144845415(+)	chr5:144844289-144845469(+)
ENSMUSG00000032344	Cgas	chr9	-	78435440	78435727	78435440	78435683	78437302	78437522	2609	82109	55706153	91586	46535641	94	50	0.0836503	0.570847	0.072,0.015,0.08,0.083	0.094,0.131,0.071,0.072	-0.029	chr9:78435727-78437303(-)	chr9:78435683-78437303(-)
ENSMUSG00000002881	Nab1	chr1	-	52464784	52464947	52464784	52464944	52466889	52466979	2612	69536665	5866	80695747	11477	53	50	0.595919	1	0.929,0.862,0.912,0.911	0.873,0.942,0.885,0.864	0.012	chr1:52464947-52466890(-)	chr1:52464944-52466890(-)
ENSMUSG00000026456	Cyb5r1	chr1	+	134407816	134408487	134408403	134408487	134407573	134407703	2614	47553032	66525968	20282622	52617658	100	50	0.00424453	0.0830625	0.263,0.346,0.203,0.19	0.161,0.187,0.146,0.159	0.087	chr1:134407703-134407817(+)	chr1:134407703-134408404(+)
ENSMUSG00000035310	Lin54	chr5	-	100475688	100475831	100475688	100475827	100480197	100480321	2616	19193220	1000	8271823	0	54	50	1	1	0.946,1.0,1.0,1.0	1.0,1.0,1.0,1.0	-0.014	chr5:100475831-100480198(-)	chr5:100475827-100480198(-)
ENSMUSG00000023992	Trem2	chr17	+	48351690	48351930	48351745	48351930	48351100	48351191	2619	1010	11424	241	121025	100	50	0.0450108	0.405302	0.043,0.0,0.2,0.0	0.0,0.091,0.5,0.091	-0.11	chr17:48351191-48351691(+)	chr17:48351191-48351746(+)
ENSMUSG00000041483	Zfp281	chr1	+	136625267	136630053	136625271	136630053	136624900	136625051	2620	220	111	1000	1001	54	50	1	1	NA,0.649,0.649,0.0	0.481,NA,NA,0.0	0.192	chr1:136625051-136625268(+)	chr1:136625051-136625272(+)
ENSMUSG00000047617	Paxx	chr2	-	25459774	25459915	25459774	25459859	25460008	25460074	2621	20231921	58844976	34292715	62545160	100	50	0.0405386	0.379737	0.147,0.12,0.162,0.121	0.215,0.212,0.209,0.111	-0.049	chr2:25459915-25460009(-)	chr2:25459859-25460009(-)
ENSMUSG00000038685	Rtel1	chr2	+	181355309	181355552	181355327	181355552	181354352	181354442	2628	15111322	3785	15171312	4834	68	50	0.717514	1	0.786,0.536,0.544,0.764	0.734,0.61,0.761,0.688	-0.041	chr2:181354442-181355310(+)	chr2:181354442-181355328(+)
ENSMUSG00000038685	Rtel1	chr2	+	181355309	181355552	181355327	181355552	181355008	181355125	2629	26263528	7201618	23223321	1619912	68	50	0.797449	1	0.732,0.489,0.617,0.534	0.514,0.46,0.729,0.563	0.026	chr2:181355125-181355310(+)	chr2:181355125-181355328(+)
ENSMUSG00000038685	Rtel1	chr2	+	181355309	181355552	181355416	181355552	181355008	181355125	2630	63806952	100	45515949	30	100	50	1	1	1.0,0.976,1.0,1.0	1.0,1.0,0.908,1.0	0.017	chr2:181355125-181355310(+)	chr2:181355125-181355417(+)
ENSMUSG00000038685	Rtel1	chr2	+	181355327	181355552	181355416	181355552	181355008	181355125	2631	53835857	100	47564450	30	100	50	1	1	1.0,0.976,1.0,1.0	1.0,1.0,0.88,1.0	0.024	chr2:181355125-181355328(+)	chr2:181355125-181355417(+)
ENSMUSG00000038685	Rtel1	chr2	+	181356345	181356616	181356357	181356616	181356157	181356258	2632	11121110	12262114	6111010	91657	62	50	0.145179	0.777999	0.425,0.271,0.297,0.365	0.35,0.357,0.617,0.535	-0.125	chr2:181356258-181356346(+)	chr2:181356258-181356358(+)
ENSMUSG00000018189	Uchl5	chr1	+	143799920	143800034	143799923	143800034	143798390	143798493	2634	196186231188	147153156154	171165146131	155142133122	53	50	0.117824	0.683332	0.557,0.534,0.583,0.535	0.51,0.523,0.509,0.503	0.041	chr1:143798493-143799921(+)	chr1:143798493-143799924(+)
ENSMUSG00000057375	Yipf1	chr4	+	107344487	107344678	107344511	107344678	107340985	107341102	2636	5464	124145156124	203	149159120134	74	50	0.045219	0.406252	0.027,0.018,0.025,0.021	0.0,0.008,0.0,0.015	0.017	chr4:107341102-107344488(+)	chr4:107341102-107344512(+)
ENSMUSG00000042508	Dmtf1	chr5	-	9121781	9122461	9121781	9121937	9124441	9124527	2637	1104	21313815	203	32302520	100	50	0.717116	1	0.023,0.016,0.0,0.118	0.0,0.032,0.0,0.07	0.014	chr5:9122461-9124442(-)	chr5:9121937-9124442(-)
ENSMUSG00000042508	Dmtf1	chr5	-	9126539	9126749	9126539	9126643	9127956	9128108	2638	36422526	100	23363022	1011	100	50	1	1	1.0,0.955,1.0,1.0	0.92,1.0,0.938,0.917	0.045	chr5:9126749-9127957(-)	chr5:9126643-9127957(-)
ENSMUSG00000042508	Dmtf1	chr5	-	9126539	9126802	9126539	9126643	9127956	9128108	2639	16261619	100	19212215	1011	100	50	1	1	1.0,0.929,1.0,1.0	0.905,1.0,0.917,0.882	0.056	chr5:9126802-9127957(-)	chr5:9126643-9127957(-)
ENSMUSG00000042508	Dmtf1	chr5	-	9126539	9126802	9126539	9126749	9127956	9128108	2640	7682	2216117	5993	418117	100	50	0.2275	0.987163	0.137,0.158,0.267,0.125	0.385,0.2,0.29,0.176	-0.091	chr5:9126802-9127957(-)	chr5:9126749-9127957(-)
ENSMUSG00000042508	Dmtf1	chr5	-	9130367	9130652	9130367	9130477	9131275	9131308	2641	7465	24213127	8765	20233627	100	50	0.634693	1	0.127,0.087,0.088,0.085	0.167,0.132,0.077,0.085	-0.019	chr5:9130652-9131276(-)	chr5:9130477-9131276(-)
ENSMUSG00000042508	Dmtf1	chr5	-	9130367	9130693	9130367	9130477	9131275	9131308	2642	6243	24213127	4645	20233627	100	50	0.505543	1	0.111,0.045,0.061,0.053	0.091,0.115,0.053,0.085	-0.019	chr5:9130693-9131276(-)	chr5:9130477-9131276(-)
ENSMUSG00000042508	Dmtf1	chr5	-	9130367	9130693	9130367	9130652	9131275	9131308	2643	1100	1222	1	4120	91	50	1	1	0.355,0.216,0.0,0.0	0.0,0.0,0.0,1.0	-0.107	chr5:9130693-9131276(-)	chr5:9130652-9131276(-)
ENSMUSG00000026872	Zeb2	chr2	-	45017396	45017468	45017396	45017465	45022846	45023104	2647	72818061	1000	69846250	10	53	50	1	1	0.985,1.0,1.0,1.0	1.0,1.0,0.983,1.0	0	chr2:45017468-45022847(-)	chr2:45017465-45022847(-)
ENSMUSG00000039678	Tbc1d13	chr2	+	30135368	30135552	30135408	30135552	30134796	30134870	2648	1222	47623943	2131	26303930	90	50	0.615285	1	0.012,0.018,0.028,0.025	0.041,0.018,0.041,0.018	-0.009	chr2:30134870-30135369(+)	chr2:30134870-30135409(+)
ENSMUSG00000030374	Strn4	chr7	+	16831345	16831580	16831464	16831580	16831024	16831138	2649	4282	12172925	322	14172319	100	50	0.0561539	0.458531	0.143,0.056,0.121,0.038	0.0,0.081,0.042,0.05	0.046	chr7:16831138-16831346(+)	chr7:16831138-16831465(+)
ENSMUSG00000030374	Strn4	chr7	+	16831345	16831580	16831485	16831580	16831024	16831138	2650	1313196	75797465	310118	68467559	100	50	0.187063	0.89199	0.08,0.076,0.114,0.044	0.022,0.098,0.068,0.063	0.016	chr7:16831138-16831346(+)	chr7:16831138-16831486(+)
ENSMUSG00000030374	Strn4	chr7	+	16831464	16831580	16831485	16831580	16831024	16831138	2651	21284229	75797465	17243226	68467559	71	50	0.902467	1	0.165,0.2,0.286,0.239	0.15,0.269,0.231,0.237	0.001	chr7:16831138-16831465(+)	chr7:16831138-16831486(+)
ENSMUSG00000032558	Nphp3	chr9	+	104040601	104040747	104040621	104040747	104039333	104039574	2657	10	4639	0	31022	70	50	1	1	0.0,0.0,0.192,0.0	0.0,0.0,0.0,0.0	0.048	chr9:104039574-104040602(+)	chr9:104039574-104040622(+)
ENSMUSG00000055897	Ppp4r1l-ps	chr2	-	173592116	173592333	173592116	173592221	173592801	173593014	2659	5425	2736	4503	364	100	50	0.955173	1	0.556,0.222,0.25,0.294	1.0,0.455,0.0,0.273	-0.102	chr2:173592333-173592802(-)	chr2:173592221-173592802(-)
ENSMUSG00000055897	Ppp4r1l-ps	chr2	-	173615482	173616423	173615482	173615576	173659322	173659367	2661	2	6737	111	6793	100	50	1	1	0.0,0.0,0.0,0.125	0.0,0.067,0.053,0.143	-0.035	chr2:173616423-173659323(-)	chr2:173615576-173659323(-)
ENSMUSG00000022756	Slc7a4	chr16	-	17575616	17575968	17575616	17575965	17576639	17576698	2662	1554	3747	4411	3614	53	50	0.897967	1	0.239,0.403,0.541,0.35	0.557,0.386,0.485,0.191	-0.022	chr16:17575968-17576640(-)	chr16:17575965-17576640(-)
ENSMUSG00000026565	Pou2f1	chr1	-	165875902	165876048	165875902	165875976	165876976	165877065	2663	910148	1	151378	0	100	50	1	1	1.0,1.0,1.0,0.8	1.0,1.0,1.0,1.0	-0.05	chr1:165876048-165876977(-)	chr1:165875976-165876977(-)
ENSMUSG00000058318	Phf21a	chr2	+	92215448	92215575	92215463	92215575	92214048	92214089	2664	4221	1222817	2025	1819813	65	50	0.839583	1	0.204,0.065,0.161,0.043	0.079,0.0,0.161,0.228	0.001	chr2:92214089-92215449(+)	chr2:92214089-92215464(+)
ENSMUSG00000058318	Phf21a	chr2	+	92230637	92230724	92230658	92230724	92228448	92228481	2665	5731	25452615	7283	37302235	71	50	0.734486	1	0.123,0.099,0.075,0.045	0.118,0.045,0.204,0.057	-0.021	chr2:92228481-92230638(+)	chr2:92228481-92230659(+)
ENSMUSG00000058318	Phf21a	chr2	+	92326912	92327164	92326915	92327164	92320228	92320459	2666	541111	71655	1110911	14876	53	50	0.648251	1	0.403,0.191,0.675,0.675	0.426,0.541,0.548,0.634	-0.051	chr2:92320459-92326913(+)	chr2:92320459-92326916(+)
ENSMUSG00000058318	Phf21a	chr2	+	92328311	92328401	92328314	92328401	92320228	92320459	2667	2647	1012128	11	116511	53	50	1.01632e-06	0.000138536	0.159,0.321,0.239,0.452	0.0,0.0,0.159,0.079	0.233	chr2:92320459-92328312(+)	chr2:92320459-92328315(+)
ENSMUSG00000026972	Arrdc1	chr2	-	24926271	24926448	24926271	24926445	24926544	24926727	2670	73696066	1521	53645456	3353	53	50	0.115076	0.676926	0.986,0.929,0.966,0.984	0.943,0.953,0.911,0.946	0.028	chr2:24926448-24926545(-)	chr2:24926445-24926545(-)
ENSMUSG00000026972	Arrdc1	chr2	-	24926877	24927032	24926877	24926946	24927125	24927176	2671	193169146156	1	164161149154	101	100	50	1	1	1.0,1.0,1.0,0.987	1.0,0.988,1.0,0.987	0.003	chr2:24927032-24927126(-)	chr2:24926946-24927126(-)
ENSMUSG00000026972	Arrdc1	chr2	-	24927125	24927176	24927125	24927172	24927728	24927839	2672	79748261	101	78747553	0	54	50	1	1	1.0,0.986,1.0,0.983	1.0,1.0,1.0,1.0	-0.008	chr2:24927176-24927729(-)	chr2:24927172-24927729(-)
ENSMUSG00000020926	Adam11	chr11	+	102774631	102774724	102774639	102774724	102774441	102774513	2673	2221	10	5622	2	58	50	1	1	1.0,1.0,0.633,1.0	1.0,1.0,1.0,0.463	0.042	chr11:102774513-102774632(+)	chr11:102774513-102774640(+)
ENSMUSG00000060733	Ipmk	chr10	+	71372704	71372880	71372707	71372880	71366008	71366105	2674	2781514	30453439	17181010	20313425	53	50	0.589552	1	0.459,0.144,0.294,0.253	0.445,0.354,0.217,0.274	-0.035	chr10:71366105-71372705(+)	chr10:71366105-71372708(+)
ENSMUSG00000040751	Lat2	chr5	-	134606045	134606093	134606045	134606081	134606360	134606392	2676	4833	16242318	3685	29142320	62	50	0.646572	1	0.168,0.212,0.095,0.118	0.077,0.257,0.219,0.168	-0.032	chr5:134606093-134606361(-)	chr5:134606081-134606361(-)
ENSMUSG00000003808	Farsa	chr8	+	84867749	84867918	84867752	84867918	84867548	84867648	2677	274255233270	1714128	237216223199	911139	53	50	0.858081	1	0.938,0.945,0.948,0.97	0.961,0.949,0.942,0.954	-0.001	chr8:84867648-84867750(+)	chr8:84867648-84867753(+)
ENSMUSG00000034361	Cpne2	chr8	+	94568590	94568827	94568593	94568827	94563956	94564090	2679	299305337275	11131218	305263282265	239118	53	50	0.892489	1	0.962,0.957,0.964,0.935	0.926,0.965,0.96,0.969	0	chr8:94564090-94568591(+)	chr8:94564090-94568594(+)
ENSMUSG00000040044	Orc3	chr4	-	34577952	34578032	34577952	34578029	34579742	34579876	2680	108839794	83518562	67866476	58666677	53	50	0.106621	0.65446	0.551,0.606,0.518,0.589	0.521,0.551,0.478,0.482	0.058	chr4:34578032-34579743(-)	chr4:34578029-34579743(-)
ENSMUSG00000040423	Rc3h1	chr1	+	160964949	160965120	160964976	160965120	160963707	160963840	2682	25232919	12	35411416	0	77	50	1	1	1.0,1.0,0.95,0.861	1.0,1.0,1.0,1.0	-0.047	chr1:160963840-160964950(+)	chr1:160963840-160964977(+)
ENSMUSG00000015869	Prpsap1	chr11	-	116479651	116479839	116479651	116479824	116485868	116485935	2683	42102	10097133105	21183	105759165	65	50	0.0859101	0.579526	0.03,0.016,0.055,0.014	0.014,0.101,0.063,0.034	-0.024	chr11:116479839-116485869(-)	chr11:116479824-116485869(-)
ENSMUSG00000042289	Hsd3b7	chr7	+	127801391	127801616	127801460	127801616	127801074	127801246	2687	715811	144126176130	79513	131115141132	100	50	0.682079	1	0.024,0.056,0.022,0.041	0.026,0.038,0.017,0.047	0.004	chr7:127801246-127801392(+)	chr7:127801246-127801461(+)
ENSMUSG00000042289	Hsd3b7	chr7	+	127802235	127802398	127802328	127802398	127802013	127802113	2689	229205325209	1030	188225212226	1000	100	50	1	1	0.991,1.0,0.982,1.0	0.989,1.0,1.0,1.0	-0.004	chr7:127802113-127802236(+)	chr7:127802113-127802329(+)
ENSMUSG00000037475	Thoc2	chrX	-	41802946	41802992	41802946	41802986	41803455	41803532	2690	45224548	20	45573147	3211	56	50	0.133934	0.736861	1.0,1.0,0.953,1.0	0.931,0.962,0.965,0.977	0.029	chrX:41802992-41803456(-)	chrX:41802986-41803456(-)
ENSMUSG00000037475	Thoc2	chrX	-	41812458	41812575	41812458	41812494	41813949	41814008	2691	17162123	42364031	25322415	32292839	100	50	0.108928	0.662007	0.168,0.182,0.208,0.271	0.281,0.356,0.3,0.161	-0.067	chrX:41812575-41813950(-)	chrX:41812494-41813950(-)
ENSMUSG00000037475	Thoc2	chrX	-	41872564	41872686	41872564	41872679	41873881	41873952	2692	43294234	110	31512823	0	57	50	1	1	1.0,0.962,0.974,1.0	1.0,1.0,1.0,1.0	-0.016	chrX:41872686-41873882(-)	chrX:41872679-41873882(-)
ENSMUSG00000026245	Farsb	chr1	-	78479956	78480111	78479956	78480013	78482307	78482363	2693	288248381277	17281917	263348291263	12855	100	50	3.76293e-06	0.000381407	0.894,0.816,0.909,0.891	0.916,0.956,0.967,0.963	-0.073	chr1:78480111-78482308(-)	chr1:78480013-78482308(-)
ENSMUSG00000032966	Fkbp1a	chr2	+	151543905	151544140	151544012	151544140	151542817	151542865	2694	3423	100	2202	1100	100	50	1	1	1.0,0.667,1.0,1.0	0.5,0.5,NA,1.0	0.25	chr2:151542865-151543906(+)	chr2:151542865-151544013(+)
ENSMUSG00000027411	Vps16	chr2	+	130441607	130441705	130441616	130441705	130441394	130441503	2696	130109127112	12171514	93110108105	81376	59	50	0.0678854	0.511145	0.902,0.845,0.878,0.871	0.908,0.878,0.929,0.937	-0.039	chr2:130441503-130441608(+)	chr2:130441503-130441617(+)
ENSMUSG00000026812	Tsc1	chr2	+	28672781	28672903	28672784	28672903	28672392	28672504	2697	1001	11152225	0	2122159	53	50	1	1	0.079,0.0,0.0,0.036	0.0,0.0,0.0,0.0	0.029	chr2:28672504-28672782(+)	chr2:28672504-28672785(+)
ENSMUSG00000026812	Tsc1	chr2	+	28675642	28675767	28675662	28675767	28675187	28675248	2698	130	15131110	11	1620914	70	50	1	1	0.0,0.052,0.163,0.0	0.0,0.0,0.074,0.049	0.023	chr2:28675248-28675643(+)	chr2:28675248-28675663(+)
ENSMUSG00000026812	Tsc1	chr2	+	28678951	28679118	28678966	28679118	28678161	28678205	2699	18122511	7673	18181625	7667	65	50	0.909556	1	0.664,0.606,0.733,0.738	0.664,0.698,0.672,0.733	-0.007	chr2:28678205-28678952(+)	chr2:28678205-28678967(+)
ENSMUSG00000002297	Dbf4	chr5	-	8404870	8404916	8404870	8404913	8405801	8405838	2700	99928595	6574	1049810484	4355	53	50	0.32694	1	0.94,0.946,0.92,0.957	0.961,0.969,0.952,0.941	-0.015	chr5:8404916-8405802(-)	chr5:8404913-8405802(-)
ENSMUSG00000031399	Fam3a	chrX	-	74387033	74387105	74387033	74387084	74387437	74387496	2701	1021	55514743	1103	49363636	71	50	0.952294	1	0.013,0.0,0.029,0.016	0.014,0.019,0.0,0.055	-0.007	chrX:74387105-74387438(-)	chrX:74387084-74387438(-)
ENSMUSG00000031399	Fam3a	chrX	-	74387627	74387806	74387627	74387751	74390473	74390497	2702	3301	45594839	2632	39423742	100	50	0.0508783	0.438174	0.032,0.025,0.0,0.013	0.025,0.067,0.039,0.023	-0.021	chrX:74387806-74390474(-)	chrX:74387751-74390474(-)
ENSMUSG00000019738	Polr2i	chr7	+	30232691	30232823	30232749	30232823	30232481	30232536	2703	1642	148188186183	5162	164127120151	100	50	0.89183	1	0.003,0.016,0.011,0.005	0.015,0.004,0.024,0.007	-0.004	chr7:30232536-30232692(+)	chr7:30232536-30232750(+)
ENSMUSG00000039356	Exosc2	chr2	+	31676664	31676736	31676667	31676736	31675838	31675904	2710	2174	128149163131	2522	110148113104	53	50	0.765427	1	0.015,0.006,0.039,0.028	0.017,0.031,0.016,0.018	0.001	chr2:31675904-31676665(+)	chr2:31675904-31676668(+)
ENSMUSG00000028545	Bend5	chr4	+	111433086	111433553	111433168	111433553	111431016	111431150	2711	1001	1010	2113	103	100	50	1	1	0.333,NA,0.0,1.0	1.0,0.333,1.0,0.333	-0.222	chr4:111431150-111433087(+)	chr4:111431150-111433169(+)
ENSMUSG00000052033	Pfdn4	chr2	+	170516549	170516690	170516561	170516690	170515738	170515846	2713	162112185173	1	133146112117	0	62	50	1	1	1.0,1.0,1.0,0.993	1.0,1.0,1.0,1.0	-0.002	chr2:170515846-170516550(+)	chr2:170515846-170516562(+)
ENSMUSG00000027082	Tfpi	chr2	-	84440139	84443312	84440139	84442925	84444009	84444138	2716	61042	42	4366	5212	100	50	0.15814	0.817159	1.0,1.0,0.333,0.333	0.286,0.429,0.75,0.6	0.15	chr2:84443312-84444010(-)	chr2:84442925-84444010(-)
ENSMUSG00000027082	Tfpi	chr2	-	84444009	84444138	84444009	84444120	84444739	84444916	2717	9110110364	3453	891139583	2435	68	50	0.738656	1	0.957,0.949,0.938,0.94	0.97,0.954,0.959,0.924	-0.006	chr2:84444138-84444740(-)	chr2:84444120-84444740(-)
ENSMUSG00000030929	Eri2	chr7	-	119786738	119787485	119786738	119786827	119787733	119787834	2718	10161513	7679	10171312	1445	100	50	0.0620959	0.481304	0.417,0.571,0.517,0.419	0.833,0.68,0.619,0.545	-0.188	chr7:119787485-119787734(-)	chr7:119786827-119787734(-)
ENSMUSG00000030929	Eri2	chr7	-	119792264	119792348	119792264	119792343	119792430	119792498	2719	13121913	2242	109912	4122	55	50	0.757367	1	0.855,0.845,0.812,0.855	0.694,0.891,0.804,0.845	0.033	chr7:119792348-119792431(-)	chr7:119792343-119792431(-)
ENSMUSG00000014873	Surf2	chr2	+	26918864	26919055	26918872	26919055	26917427	26917531	2720	2232	42303630	1443	37435643	58	50	0.782352	1	0.039,0.054,0.067,0.054	0.023,0.074,0.058,0.057	0.001	chr2:26917531-26918865(+)	chr2:26917531-26918873(+)
ENSMUSG00000014873	Surf2	chr2	+	26918864	26919055	26918928	26919055	26917427	26917531	2721	68517660	14191611	61927583	516720	100	50	0.0734622	0.535786	0.708,0.573,0.704,0.732	0.859,0.742,0.843,0.675	-0.101	chr2:26917531-26918865(+)	chr2:26917531-26918929(+)
ENSMUSG00000014873	Surf2	chr2	+	26918872	26919055	26918928	26919055	26917427	26917531	2722	1087910988	14191611	98132127124	516720	100	50	0.0470525	0.418916	0.794,0.675,0.773,0.8	0.907,0.805,0.901,0.756	-0.082	chr2:26917531-26918873(+)	chr2:26917531-26918929(+)
ENSMUSG00000041351	Rap1gap	chr4	+	137727676	137727779	137727729	137727779	137726951	137727075	2724	123128	1000	79107	0	100	50	1	1	0.857,1.0,1.0,1.0	1.0,1.0,1.0,1.0	-0.036	chr4:137727075-137727677(+)	chr4:137727075-137727730(+)
ENSMUSG00000041351	Rap1gap	chr4	+	137728228	137728363	137728259	137728363	137727676	137727779	2725	132	3543	2330	2010	81	50	1	1	0.0,0.11,0.316,0.292	0.382,1.0,0.649,NA	-0.498	chr4:137727779-137728229(+)	chr4:137727779-137728260(+)
ENSMUSG00000026566	Mpzl1	chr1	-	165601749	165601864	165601749	165601855	165604609	165604742	2727	1	8555	0	6444	59	50	1	1	0.0,0.0,0.0,0.145	0.0,0.0,0.0,0.0	0.036	chr1:165601864-165604610(-)	chr1:165601855-165604610(-)
ENSMUSG00000025271	Pfkfb1	chrX	+	150589795	150590084	150589952	150590084	150588944	150589044	2729	2104	2156	2013	3143	100	50	0.890636	1	0.333,0.333,0.0,0.25	0.25,0.0,0.111,0.333	0.056	chrX:150589044-150589796(+)	chrX:150589044-150589953(+)
ENSMUSG00000006281	Tep1	chr14	-	50844254	50844430	50844254	50844357	50844533	50844728	2732	29252433	21	29241914	100	100	50	1	1	1.0,1.0,0.857,0.943	1.0,0.923,1.0,1.0	-0.031	chr14:50844430-50844534(-)	chr14:50844357-50844534(-)
ENSMUSG00000039463	Slc9a8	chr2	+	167459648	167459754	167459660	167459754	167457326	167457465	2733	30454144	10	39232433	100	62	50	1	1	1.0,1.0,0.971,1.0	1.0,0.949,1.0,1.0	0.006	chr2:167457465-167459649(+)	chr2:167457465-167459661(+)
ENSMUSG00000039686	Zer1	chr2	-	30110204	30110420	30110204	30110381	30110661	30111098	2734	2433	43455031	3532	44473840	89	50	0.833869	1	0.025,0.048,0.033,0.052	0.037,0.056,0.042,0.027	-0.001	chr2:30110420-30110662(-)	chr2:30110381-30110662(-)
ENSMUSG00000043557	Mdga1	chr17	-	29832912	29833021	29832912	29832969	29833221	29833352	2735	54599759	1302	53525193	5201	100	50	0.682104	1	0.964,0.908,1.0,0.937	0.841,0.929,1.0,0.979	0.015	chr17:29833021-29833222(-)	chr17:29832969-29833222(-)
ENSMUSG00000033526	Ppip5k1	chr2	-	121347480	121347683	121347480	121347642	121348466	121348568	2737	3346	14151614	211	21221412	91	50	0.000146055	0.00668289	0.105,0.099,0.121,0.191	0.0,0.048,0.038,0.044	0.097	chr2:121347683-121348467(-)	chr2:121347642-121348467(-)
ENSMUSG00000027710	Acad9	chr3	+	36085413	36085542	36085488	36085542	36082108	36082228	2738	178141155168	7865	189176166177	11594	100	50	0.942058	1	0.927,0.898,0.928,0.944	0.896,0.946,0.902,0.957	-0.001	chr3:36082228-36085414(+)	chr3:36082228-36085489(+)
ENSMUSG00000027710	Acad9	chr3	+	36087719	36087799	36087759	36087799	36085413	36085542	2739	138110146125	2343	164167131153	1001	90	50	0.0142291	0.188119	0.975,0.953,0.953,0.959	0.989,1.0,1.0,0.988	-0.034	chr3:36085542-36087720(+)	chr3:36085542-36087760(+)
ENSMUSG00000040688	Tbl3	chr17	-	24701976	24702068	24701976	24702047	24702144	24702375	2741	42422336	118114109118	21251529	798986101	71	50	0.192724	0.91129	0.2,0.206,0.129,0.177	0.158,0.165,0.109,0.168	0.028	chr17:24702068-24702145(-)	chr17:24702047-24702145(-)
ENSMUSG00000001376	Vps50	chr6	+	3601367	3603315	3602659	3603315	3600127	3600317	2742	8254	39424847	4465	26383026	100	50	0.328547	1	0.093,0.023,0.05,0.041	0.071,0.05,0.091,0.088	-0.023	chr6:3600317-3601368(+)	chr6:3600317-3602660(+)
ENSMUSG00000027624	Epb41l1	chr2	+	156510732	156510881	156510735	156510881	156509131	156509307	2743	133	1010	1311	0	53	50	1	1	0.0,1.0,0.739,1.0	1.0,1.0,1.0,1.0	-0.315	chr2:156509307-156510733(+)	chr2:156509307-156510736(+)
ENSMUSG00000027624	Epb41l1	chr2	+	156510732	156510881	156510756	156510881	156509131	156509307	2744	253	1	1421	10	74	50	1	1	NA,1.0,1.0,0.67	1.0,1.0,0.575,1.0	-0.004	chr2:156509307-156510733(+)	chr2:156509307-156510757(+)
ENSMUSG00000027624	Epb41l1	chr2	+	156510735	156510881	156510756	156510881	156509131	156509307	2745	1130	1	110	10	71	50	1	1	1.0,1.0,1.0,0.0	NA,1.0,0.413,NA	0.043	chr2:156509307-156510736(+)	chr2:156509307-156510757(+)
ENSMUSG00000038421	Fcrla	chr1	-	170920833	170921118	170920833	170920984	170921517	170921784	2746	11	0	3364	10	100	50	1	1	NA,NA,1.0,1.0	1.0,1.0,0.75,1.0	0.062	chr1:170921118-170921518(-)	chr1:170920984-170921518(-)
ENSMUSG00000038421	Fcrla	chr1	-	170922221	170922407	170922221	170922404	170927461	170927583	2748	10	0	1010	1110	53	50	1	1	NA,NA,1.0,NA	0.485,0.0,0.485,NA	0.677	chr1:170922407-170927462(-)	chr1:170922404-170927462(-)
ENSMUSG00000047248	C2cd3	chr7	+	100379967	100380125	100380025	100380125	100374263	100374533	2751	66546865	4934	56587167	2240	100	50	0.00917435	0.142663	0.892,0.75,0.919,0.89	0.933,0.935,0.899,1.0	-0.079	chr7:100374533-100379968(+)	chr7:100374533-100380026(+)
ENSMUSG00000047248	C2cd3	chr7	+	100413325	100413448	100413329	100413448	100410331	100410450	2752	50394454	3211	45575547	1221	54	50	0.628565	1	0.939,0.948,0.976,0.98	0.977,0.963,0.962,0.978	-0.009	chr7:100410450-100413326(+)	chr7:100410450-100413330(+)
ENSMUSG00000062729	Ppox	chr1	-	171280139	171280288	171280139	171280255	171280387	171280522	2755	109711	32282437	41799	33482828	83	50	0.873886	1	0.158,0.162,0.149,0.152	0.068,0.176,0.162,0.162	0.013	chr1:171280288-171280388(-)	chr1:171280255-171280388(-)
ENSMUSG00000039637	Coro7	chr16	-	4633254	4633430	4633254	4633396	4633713	4633837	2756	271338232211	120	292228274211	1111	84	50	1	1	1.0,0.995,0.986,1.0	0.994,0.993,0.994,0.992	0.002	chr16:4633430-4633714(-)	chr16:4633396-4633714(-)
ENSMUSG00000043085	Tmem82	chr4	-	141614944	141615135	141614944	141615110	141616203	141616621	2759	2133	1100	124	11	75	50	1	1	0.571,0.4,1.0,1.0	NA,1.0,0.571,0.727	-0.023	chr4:141615135-141616204(-)	chr4:141615110-141616204(-)
ENSMUSG00000029802	Abcg2	chr6	+	58689538	58689644	58689554	58689644	58685666	58685821	2762	1112	24364839	102	31433851	66	50	0.567107	1	0.031,0.021,0.016,0.037	0.0,0.017,0.0,0.029	0.015	chr6:58685821-58689539(+)	chr6:58685821-58689555(+)
ENSMUSG00000002833	Hdgfl2	chr17	+	56096820	56097016	56096847	56097016	56096204	56096276	2764	27413322	70729859	51594443	65636163	77	50	5.30897e-05	0.00317975	0.2,0.27,0.179,0.195	0.338,0.378,0.319,0.307	-0.124	chr17:56096276-56096821(+)	chr17:56096276-56096848(+)
ENSMUSG00000002833	Hdgfl2	chr17	+	56096820	56097016	56096850	56097016	56096204	56096276	2765	27423323	16171518	52604443	13191021	80	50	0.0353336	0.349184	0.513,0.607,0.579,0.444	0.714,0.664,0.733,0.561	-0.132	chr17:56096276-56096821(+)	chr17:56096276-56096851(+)
ENSMUSG00000002833	Hdgfl2	chr17	+	56096847	56097016	56096850	56097016	56096204	56096276	2766	70739860	16171518	66646163	13191021	53	50	0.616784	1	0.805,0.802,0.86,0.759	0.827,0.761,0.852,0.739	0.012	chr17:56096276-56096848(+)	chr17:56096276-56096851(+)
ENSMUSG00000002833	Hdgfl2	chr17	+	56100344	56100592	56100347	56100592	56099858	56099985	2767	107124101104	56424830	79979388	32403732	53	50	0.920653	1	0.643,0.736,0.665,0.766	0.7,0.696,0.703,0.722	-0.003	chr17:56099985-56100345(+)	chr17:56099985-56100348(+)
ENSMUSG00000051278	Zgrf1	chr3	+	127594459	127596022	127595878	127596022	127589968	127590108	2770	3355	661214	342	111044	100	50	0.398339	1	0.2,0.2,0.172,0.152	0.0,0.13,0.333,0.2	0.015	chr3:127590108-127594460(+)	chr3:127590108-127595879(+)
ENSMUSG00000040532	Abhd11	chr5	+	135011209	135011380	135011240	135011380	135010886	135011060	2771	339440357317	1426	306307256279	1127	81	50	0.908193	1	0.995,0.985,0.991,0.97	0.995,0.995,0.988,0.961	0.001	chr5:135011060-135011210(+)	chr5:135011060-135011241(+)
ENSMUSG00000025932	Eya1	chr1	-	14270704	14270842	14270704	14270827	14274064	14274210	2772	71027	121	5347	214	65	50	0.0660227	0.501899	1.0,0.885,0.435,0.843	1.0,0.536,0.755,0.574	0.075	chr1:14270842-14274065(-)	chr1:14270827-14274065(-)
ENSMUSG00000025932	Eya1	chr1	-	14274064	14274207	14274064	14274143	14274533	14274603	2773	882110	1	36103	100	100	50	1	1	1.0,1.0,1.0,0.833	1.0,0.75,1.0,1.0	0.021	chr1:14274207-14274534(-)	chr1:14274143-14274534(-)
ENSMUSG00000025932	Eya1	chr1	-	14274064	14274210	14274064	14274143	14274533	14274603	2774	782111	1	2683	100	100	50	1	1	1.0,1.0,1.0,0.846	1.0,0.75,1.0,1.0	0.024	chr1:14274210-14274534(-)	chr1:14274143-14274534(-)
ENSMUSG00000025932	Eya1	chr1	-	14274064	14274210	14274064	14274207	14274533	14274603	2775	3275	4264	213	1233	53	50	0.205136	0.93746	0.414,0.485,0.524,0.541	0.0,0.485,0.239,0.485	0.189	chr1:14274210-14274534(-)	chr1:14274207-14274534(-)
ENSMUSG00000063362	Alg11	chr8	+	22064999	22065931	22065125	22065931	22061885	22062116	2776	1392213	1000	7151921	1210	100	50	0.812223	1	0.867,1.0,1.0,1.0	0.778,0.789,0.905,1.0	0.099	chr8:22062116-22065000(+)	chr8:22062116-22065126(+)
ENSMUSG00000046311	Zfp62	chr11	+	49214525	49214654	49214554	49214654	49213589	49213642	2777	8221	1302	2010	0	79	50	1	1	0.835,0.297,1.0,0.24	1.0,NA,1.0,NA	-0.407	chr11:49213642-49214526(+)	chr11:49213642-49214555(+)
ENSMUSG00000042249	Grk3	chr5	-	112969167	112969308	112969167	112969269	112973506	112973580	2778	1116223	13111212	101087	9191210	89	50	0.365469	1	0.322,0.45,0.507,0.123	0.384,0.228,0.272,0.282	0.059	chr5:112969308-112973507(-)	chr5:112969269-112973507(-)
ENSMUSG00000037913	Tmem156	chr5	-	65075562	65075823	65075562	65075736	65079921	65080086	2780	27413839	4584	37362148	3401	100	50	0.00752246	0.125576	0.771,0.804,0.704,0.83	0.86,0.818,1.0,0.96	-0.132	chr5:65075823-65079922(-)	chr5:65075736-65079922(-)
ENSMUSG00000037913	Tmem156	chr5	-	65079921	65080191	65079921	65080086	65091358	65091425	2781	26221912	210	2210818	101	100	50	1	1	1.0,0.846,0.905,1.0	1.0,0.833,1.0,0.9	0.005	chr5:65080191-65091359(-)	chr5:65080086-65091359(-)
ENSMUSG00000027206	Cops2	chr2	-	125842621	125842732	125842621	125842711	125844809	125844935	2783	33495441	132137128127	65606251	941059090	71	50	6.50143e-06	0.000571115	0.15,0.201,0.229,0.185	0.327,0.287,0.327,0.285	-0.115	chr2:125842732-125844810(-)	chr2:125842711-125844810(-)
ENSMUSG00000068040	Tm9sf4	chr2	+	153198349	153198433	153198353	153198433	153195489	153195565	2786	138138142144	1004	136118125132	1002	54	50	1	1	0.992,1.0,1.0,0.971	0.992,1.0,1.0,0.984	-0.003	chr2:153195565-153198350(+)	chr2:153195565-153198354(+)
ENSMUSG00000041238	Rbbp8	chr18	+	11720509	11720657	11720544	11720657	11718832	11718930	2788	1021	73445057	5431	55685346	85	50	0.0307688	0.318401	0.008,0.0,0.023,0.01	0.051,0.033,0.032,0.013	-0.022	chr18:11718930-11720510(+)	chr18:11718930-11720545(+)
ENSMUSG00000027709	Mccc1	chr3	-	35964326	35964480	35964326	35964464	35968423	35968473	2789	102	1892617	10	13193430	66	50	1	1	0.0,0.078,0.0,0.082	0.0,0.0,0.022,0.0	0.035	chr3:35964480-35968424(-)	chr3:35964464-35968424(-)
ENSMUSG00000027953	Slc50a1	chr3	-	89269049	89269298	89269049	89269211	89269826	89270139	2791	19251719	12212111494	23201822	88968375	100	50	0.0966986	0.616084	0.072,0.094,0.069,0.092	0.116,0.094,0.098,0.128	-0.027	chr3:89269298-89269827(-)	chr3:89269211-89269827(-)
ENSMUSG00000018398	Sept8	chr11	+	53534948	53535135	53534954	53535135	53534432	53534628	2794	41618663	17284838	30764974	12463535	56	50	0.719867	1	0.683,0.66,0.615,0.597	0.691,0.596,0.556,0.654	0.014	chr11:53534628-53534949(+)	chr11:53534628-53534955(+)
ENSMUSG00000026096	Osgepl1	chr1	+	53317901	53318289	53317906	53318289	53314855	53315099	2798	18162221	1221	16221617	2323	55	50	0.150634	0.79342	0.942,0.879,0.909,0.95	0.879,0.87,0.879,0.837	0.054	chr1:53315099-53317902(+)	chr1:53315099-53317907(+)
ENSMUSG00000026790	Odf2	chr2	+	29893000	29893154	29893037	29893154	29892185	29892276	2799	172183183161	64114	148130120127	9526	87	50	0.677045	1	0.943,0.963,0.905,0.959	0.904,0.937,0.972,0.924	0.008	chr2:29892276-29893001(+)	chr2:29892276-29893038(+)
ENSMUSG00000026790	Odf2	chr2	+	29912565	29912640	29912568	29912640	29903975	29904107	2800	20253029	13596115112	17211919	13110011683	53	50	0.151156	0.793521	0.123,0.197,0.197,0.196	0.109,0.165,0.134,0.178	0.032	chr2:29904107-29912566(+)	chr2:29904107-29912569(+)
ENSMUSG00000078656	Vps25	chr11	+	101254918	101254996	101254942	101254996	101254030	101254176	2801	5151210	270304271239	9477	298290274261	74	50	0.0531603	0.448995	0.012,0.032,0.029,0.027	0.02,0.009,0.017,0.018	0.009	chr11:101254176-101254919(+)	chr11:101254176-101254943(+)
ENSMUSG00000026153	Fam135a	chr1	-	24028199	24030528	24028199	24029940	24030741	24030896	2802	2023	1101	1001	1	100	50	1	1	0.5,0.0,1.0,0.6	1.0,NA,NA,0.333	-0.141	chr1:24030528-24030742(-)	chr1:24029940-24030742(-)
ENSMUSG00000039431	Mtmr7	chr8	-	40554270	40554601	40554270	40554397	40555775	40555916	2808	1010	0	10	1	100	50	1	1	1.0,NA,1.0,NA	NA,NA,1.0,0.0	0.5	chr8:40554601-40555776(-)	chr8:40554397-40555776(-)
ENSMUSG00000053730	Tmem39b	chr4	-	129692432	129692673	129692432	129692516	129693065	129693285	2809	6435	46426579	7275	38444950	100	50	0.253068	1	0.061,0.045,0.023,0.031	0.084,0.022,0.067,0.048	-0.015	chr4:129692673-129693066(-)	chr4:129692516-129693066(-)
ENSMUSG00000031362	Xlr4c	chrX	-	73242067	73242195	73242067	73242182	73242613	73242660	2812	202	10	200	10	63	50	1	1	NA,1.0,0.0,1.0	NA,1.0,0.0,NA	0.167	chrX:73242195-73242614(-)	chrX:73242182-73242614(-)
ENSMUSG00000059540	Tcea2	chr2	+	181685776	181685922	181685791	181685922	181684442	181684533	2813	12	619138	0	910914	65	50	1	1	0.0,0.0,0.056,0.161	0.0,0.0,0.0,0.0	0.054	chr2:181684533-181685777(+)	chr2:181684533-181685792(+)
ENSMUSG00000042185	Nfrkb	chr9	+	31396793	31397137	31396999	31397137	31396322	31396497	2815	614104	61178	41648	911116	100	50	0.537555	1	0.333,0.389,0.417,0.2	0.182,0.421,0.154,0.4	0.045	chr9:31396497-31396794(+)	chr9:31396497-31397000(+)
ENSMUSG00000042185	Nfrkb	chr9	+	31396793	31397137	31397035	31397137	31396322	31396497	2816	12111811	13222115	12181514	61266	100	50	0.000801349	0.0255462	0.316,0.2,0.3,0.268	0.5,0.429,0.556,0.538	-0.235	chr9:31396497-31396794(+)	chr9:31396497-31397036(+)
ENSMUSG00000042185	Nfrkb	chr9	+	31396999	31397137	31397035	31397137	31396322	31396497	2817	15161716	13222115	20192213	61266	86	50	0.000674825	0.0224167	0.401,0.297,0.32,0.383	0.66,0.479,0.681,0.557	-0.244	chr9:31396497-31397000(+)	chr9:31396497-31397036(+)
ENSMUSG00000041408	Wapl	chr14	+	34694986	34695105	34695004	34695105	34691681	34692734	2821	948811284	13131616	731167682	17301519	68	50	0.0327881	0.332337	0.842,0.833,0.837,0.794	0.759,0.74,0.788,0.76	0.065	chr14:34692734-34694987(+)	chr14:34692734-34695005(+)
ENSMUSG00000041408	Wapl	chr14	+	34739230	34739438	34739311	34739438	34737855	34738020	2822	219219227221	1582	193260199165	5823	100	50	0.587879	1	0.991,0.956,0.934,0.982	0.951,0.942,0.98,0.965	0.006	chr14:34738020-34739231(+)	chr14:34738020-34739312(+)
ENSMUSG00000030084	Plxna1	chr6	-	89322730	89322921	89322730	89322855	89323235	89323332	2823	461712	10	6589	0	100	50	1	1	1.0,1.0,0.895,1.0	1.0,1.0,1.0,1.0	-0.026	chr6:89322921-89323236(-)	chr6:89322855-89323236(-)
ENSMUSG00000038533	Cbfa2t2	chr2	+	154531221	154531412	154531224	154531412	154528836	154528905	2831	30143323	34105	21171521	6574	53	50	0.406117	1	0.904,0.768,0.757,0.813	0.768,0.762,0.669,0.832	0.053	chr2:154528905-154531222(+)	chr2:154528905-154531225(+)
ENSMUSG00000028952	Zbtb48	chr4	-	152020543	152020708	152020543	152020704	152020778	152020915	2833	27271932	2010	16323321	210	54	50	1	1	0.926,1.0,0.946,1.0	1.0,0.937,0.968,1.0	-0.008	chr4:152020708-152020779(-)	chr4:152020704-152020779(-)
ENSMUSG00000028952	Zbtb48	chr4	-	152022026	152022234	152022026	152022119	152022695	152022807	2834	27231715	1917208	8201413	11111315	100	50	0.538957	1	0.415,0.404,0.298,0.484	0.267,0.476,0.35,0.302	0.051	chr4:152022234-152022696(-)	chr4:152022119-152022696(-)
ENSMUSG00000057594	Arl16	chr11	-	120466653	120466767	120466653	120466732	120467181	120467240	2836	41284934	4336	41395232	2541	85	50	0.306851	1	0.858,0.846,0.906,0.769	0.923,0.821,0.884,0.95	-0.05	chr11:120466767-120467182(-)	chr11:120466732-120467182(-)
ENSMUSG00000021123	Rdh12	chr12	+	79212652	79212757	79212688	79212757	79211387	79211543	2838	33341020	10	30232127	2001	86	50	1	1	1.0,1.0,0.853,1.0	0.897,1.0,1.0,0.94	0.004	chr12:79211543-79212653(+)	chr12:79211543-79212689(+)
ENSMUSG00000058135	Gstm1	chr3	-	108014944	108015118	108014944	108015040	108016327	108016428	2839	55624450	1696153112341143	47233731	14286576821002	100	50	0.844003	1	0.016,0.02,0.018,0.021	0.016,0.017,0.026,0.015	0	chr3:108015118-108016328(-)	chr3:108015040-108016328(-)
ENSMUSG00000058135	Gstm1	chr3	-	108014944	108015145	108014944	108015040	108016327	108016428	2840	31302132	1696153112341143	29182321	14286576821002	100	50	0.413434	1	0.009,0.01,0.008,0.014	0.01,0.014,0.017,0.01	-0.003	chr3:108015145-108016328(-)	chr3:108015040-108016328(-)
ENSMUSG00000058135	Gstm1	chr3	-	108014944	108015145	108014944	108015118	108016327	108016428	2841	3543	24322319	8653	1861410	77	50	0.00570642	0.103002	0.075,0.092,0.101,0.093	0.224,0.394,0.188,0.163	-0.152	chr3:108015145-108016328(-)	chr3:108015118-108016328(-)
ENSMUSG00000053091	Lins1	chr7	+	66710158	66710746	66710229	66710746	66709293	66709435	2844	13241512	5177	15997	6835	100	50	0.198909	0.923733	0.565,0.923,0.517,0.462	0.556,0.36,0.6,0.412	0.135	chr7:66709435-66710159(+)	chr7:66709435-66710230(+)
ENSMUSG00000028644	Ermap	chr4	-	119188175	119188334	119188175	119188321	119188858	119188943	2849	1432	10132311	2021	6321811	63	50	0.0382478	0.368764	0.074,0.196,0.094,0.126	0.209,0.0,0.081,0.067	0.033	chr4:119188334-119188859(-)	chr4:119188321-119188859(-)
ENSMUSG00000078427	Sarnp	chr10	+	128838443	128838490	128838446	128838490	128833311	128833411	2850	424319454440	152115151130	288398320280	101119110115	53	50	0.736027	1	0.725,0.724,0.739,0.762	0.729,0.759,0.733,0.697	0.008	chr10:128833411-128838444(+)	chr10:128833411-128838447(+)
ENSMUSG00000038241	Cep250	chr2	+	155968754	155968862	155968757	155968862	155967557	155967654	2851	21221823	201	14231821	0	53	50	1	1	1.0,0.912,1.0,0.956	1.0,1.0,1.0,1.0	-0.033	chr2:155967654-155968755(+)	chr2:155967654-155968758(+)
ENSMUSG00000038241	Cep250	chr2	+	155974249	155974483	155974252	155974483	155973342	155973489	2852	3924	16281818	5692	18262017	53	50	0.577569	1	0.15,0.233,0.095,0.173	0.208,0.179,0.298,0.1	-0.034	chr2:155973489-155974250(+)	chr2:155973489-155974253(+)
ENSMUSG00000074646	6430550D23Rik	chr2	-	156002436	156002559	156002436	156002486	156003100	156003250	2854	0	1010	100	2300	100	50	1	1	0.0,NA,0.0,NA	0.0,0.143,NA,NA	-0.071	chr2:156002559-156003101(-)	chr2:156002486-156003101(-)
ENSMUSG00000002804	Nudt14	chr12	-	112938355	112938593	112938355	112938557	112938794	112938859	2856	100108126101	23183022	76937883	17151819	86	50	0.898796	1	0.717,0.777,0.709,0.727	0.722,0.783,0.716,0.717	-0.002	chr12:112938593-112938795(-)	chr12:112938557-112938795(-)
ENSMUSG00000027333	Smox	chr2	+	131516197	131516443	131516216	131516443	131511983	131512217	2857	210	25314215	110	28283817	69	50	1	1	0.0,0.045,0.017,0.0	0.0,0.025,0.019,0.0	0.005	chr2:131512217-131516198(+)	chr2:131512217-131516217(+)
ENSMUSG00000027333	Smox	chr2	+	131520411	131521171	131520921	131521171	131520094	131520268	2858	33335022	100	30493624	0	100	50	1	1	1.0,0.943,1.0,1.0	1.0,1.0,1.0,1.0	-0.014	chr2:131520268-131520412(+)	chr2:131520268-131520922(+)
ENSMUSG00000027333	Smox	chr2	+	131520411	131521171	131521054	131521171	131520094	131520268	2859	29354523	1000	28402932	0	100	50	1	1	0.935,1.0,1.0,1.0	1.0,1.0,1.0,1.0	-0.016	chr2:131520268-131520412(+)	chr2:131520268-131521055(+)
ENSMUSG00000027333	Smox	chr2	+	131520921	131521171	131521054	131521171	131520094	131520268	2860	17212111	1000	14161520	0	100	50	1	1	0.895,1.0,1.0,1.0	1.0,1.0,1.0,1.0	-0.026	chr2:131520268-131520922(+)	chr2:131520268-131521055(+)
ENSMUSG00000027333	Smox	chr2	+	131522058	131522219	131522147	131522219	131520411	131521171	2862	32384841	212	24553930	2220	100	50	0.715891	1	1.0,0.905,0.96,0.911	0.857,0.932,0.907,1.0	0.02	chr2:131521171-131522059(+)	chr2:131521171-131522148(+)
ENSMUSG00000029283	Cdc7	chr5	+	106974600	106975660	106975484	106975660	106973776	106974020	2865	31294331	32442722	30613845	1812135	100	50	8.99003e-05	0.0045561	0.326,0.248,0.443,0.413	0.455,0.718,0.594,0.818	-0.289	chr5:106974020-106974601(+)	chr5:106974020-106975485(+)
ENSMUSG00000029283	Cdc7	chr5	+	106979294	106979444	106979315	106979444	106976629	106976712	2866	70485467	2301	58726448	2434	71	50	0.0408067	0.38006	0.961,0.918,1.0,0.979	0.953,0.927,0.938,0.894	0.037	chr5:106976712-106979295(+)	chr5:106976712-106979316(+)
ENSMUSG00000089824	Rbm12	chr2	-	156103348	156103429	156103348	156103397	156111785	156111956	2870	46527239	32202719	29523638	20231818	82	50	0.704207	1	0.467,0.613,0.619,0.556	0.469,0.58,0.549,0.563	0.024	chr2:156103429-156111786(-)	chr2:156103397-156111786(-)
ENSMUSG00000027620	Rbm39	chr2	-	156154238	156154289	156154238	156154271	156158399	156158477	2871	293323336282	301296267256	186263196181	180271210191	68	50	0.181286	0.88254	0.417,0.445,0.481,0.448	0.432,0.416,0.407,0.411	0.031	chr2:156154289-156158400(-)	chr2:156154271-156158400(-)
ENSMUSG00000027620	Rbm39	chr2	-	156167537	156167591	156167537	156167588	156167684	156167750	2872	409399422399	20274431	249359320287	18191918	53	50	0.195844	0.915056	0.951,0.933,0.9,0.924	0.929,0.947,0.941,0.938	-0.012	chr2:156167591-156167685(-)	chr2:156167588-156167685(-)
ENSMUSG00000010721	Lmbr1	chr5	-	29323801	29323905	29323801	29323824	29346766	29346906	2873	911259	1000	821187	0	100	50	1	1	0.818,1.0,1.0,1.0	1.0,1.0,1.0,1.0	-0.045	chr5:29323905-29346767(-)	chr5:29323824-29346767(-)
ENSMUSG00000031568	Rwdd4a	chr8	+	47542691	47542801	47542695	47542801	47537278	47537359	2874	49386243	1202	55385936	312	54	50	1	1	0.978,0.946,1.0,0.952	1.0,0.921,0.982,0.943	0.007	chr8:47537359-47542692(+)	chr8:47537359-47542696(+)
ENSMUSG00000027655	Dhx35	chr2	+	158806397	158806490	158806402	158806490	158801374	158801508	2875	33353831	10	38413332	0	55	50	1	1	1.0,1.0,0.972,1.0	1.0,1.0,1.0,1.0	-0.007	chr2:158801508-158806398(+)	chr2:158801508-158806403(+)
ENSMUSG00000027655	Dhx35	chr2	+	158815409	158815534	158815429	158815534	158806922	158807000	2876	301	36353737	1462	19313524	70	50	0.00099943	0.0306259	0.0,0.058,0.0,0.019	0.036,0.084,0.109,0.056	-0.052	chr2:158807000-158815410(+)	chr2:158807000-158815430(+)
ENSMUSG00000000339	Rtca	chr3	-	116504344	116504468	116504344	116504446	116506834	116506978	2877	751289694	41294	115134105111	4624	72	50	0.0112418	0.156475	0.929,0.881,0.881,0.942	0.952,0.939,0.973,0.951	-0.045	chr3:116504468-116506835(-)	chr3:116504446-116506835(-)
ENSMUSG00000000339	Rtca	chr3	-	116506834	116506993	116506834	116506978	116507750	116507851	2878	342	53514238	1152	65593750	65	50	0.865493	1	0.0,0.043,0.068,0.039	0.012,0.013,0.094,0.03	0	chr3:116506993-116507751(-)	chr3:116506978-116507751(-)
ENSMUSG00000057133	Chd6	chr2	-	161041984	161042132	161041984	161042129	161052387	161052905	2880	17231721	9387	1625815	7445	53	50	0.766345	1	0.641,0.879,0.667,0.739	0.683,0.855,0.654,0.739	-0.001	chr2:161042132-161052388(-)	chr2:161042129-161052388(-)
ENSMUSG00000029518	Rab35	chr5	+	115640079	115640203	115640083	115640203	115637715	115637766	2881	746110169	1531	65785584	4240	54	50	0.898631	1	0.986,0.919,0.969,0.985	0.938,0.973,0.927,1.0	0.005	chr5:115637766-115640080(+)	chr5:115637766-115640084(+)
ENSMUSG00000040351	Ankib1	chr5	-	3694778	3694893	3694778	3694875	3700355	3700407	2884	20252724	6148	29332027	2311	68	50	0.00437225	0.0851404	0.71,0.948,0.832,0.688	0.914,0.89,0.936,0.952	-0.129	chr5:3694893-3700356(-)	chr5:3694875-3700356(-)
ENSMUSG00000053483	Usp21	chr1	-	171285254	171285384	171285254	171285375	171285541	171285601	2889	1	74758365	3100	61544661	59	50	1	1	0.0,0.0,0.0,0.013	0.04,0.015,0.0,0.0	-0.011	chr1:171285384-171285542(-)	chr1:171285375-171285542(-)
ENSMUSG00000068551	Zfp467	chr6	-	48436612	48439454	48436612	48439357	48441946	48442060	2894	912147	100	34119	0	100	50	1	1	1.0,0.857,1.0,1.0	1.0,1.0,1.0,1.0	-0.036	chr6:48439454-48441947(-)	chr6:48439357-48441947(-)
ENSMUSG00000025665	Rps6ka6	chrX	-	111400207	111400284	111400207	111400269	111404677	111404839	2895	21	1121	200	0	65	50	1	1	0.0,0.0,0.435,0.435	NA,1.0,NA,NA	-0.782	chrX:111400284-111404678(-)	chrX:111400269-111404678(-)
ENSMUSG00000025764	Jade1	chr3	+	41593766	41593954	41593802	41593954	41591682	41591840	2897	73707662	215	49625363	2121	86	50	0.672727	1	1.0,0.953,0.978,0.878	0.934,0.973,0.939,0.973	-0.002	chr3:41591840-41593767(+)	chr3:41591840-41593803(+)
ENSMUSG00000021548	Ccnh	chr13	+	85197350	85197561	85197530	85197561	85196251	85196325	2899	230238288241	10181022	256314264260	86611	100	50	0.000743189	0.0243758	0.92,0.869,0.935,0.846	0.941,0.963,0.957,0.922	-0.053	chr13:85196325-85197351(+)	chr13:85196325-85197531(+)
ENSMUSG00000021548	Ccnh	chr13	+	85202332	85202496	85202440	85202496	85197350	85197561	2901	246218313240	44744746	307332267300	20181618	100	50	1.78779e-12	1.17786e-09	0.737,0.596,0.769,0.723	0.885,0.902,0.893,0.893	-0.187	chr13:85197561-85202333(+)	chr13:85197561-85202441(+)
ENSMUSG00000003581	Rnf215	chr11	+	4137211	4137368	4137308	4137368	4136711	4136797	2902	39494438	1100	47312829	201	100	50	1	1	0.951,0.961,1.0,1.0	1.0,0.886,1.0,0.935	0.023	chr11:4136797-4137212(+)	chr11:4136797-4137309(+)
ENSMUSG00000039671	Zmynd8	chr2	-	165846020	165846239	165846020	165846164	165851999	165852148	2905	52607154	60396137	45484345	47555654	100	50	0.0366389	0.358499	0.302,0.435,0.368,0.422	0.324,0.304,0.277,0.294	0.082	chr2:165846239-165852000(-)	chr2:165846164-165852000(-)
ENSMUSG00000006050	Sra1	chr18	-	36667790	36667899	36667790	36667893	36668651	36668848	2906	146130206121	2132	133135121111	1301	56	50	1	1	0.985,0.991,0.984,0.982	0.992,0.976,1.0,0.99	-0.004	chr18:36667899-36668652(-)	chr18:36667893-36668652(-)
ENSMUSG00000021901	Bap1	chr14	+	31257288	31257767	31257625	31257767	31256660	31256791	2907	201230209216	117137	224214211212	5864	100	50	0.046644	0.417843	0.901,0.943,0.889,0.939	0.957,0.93,0.946,0.964	-0.031	chr14:31256791-31257289(+)	chr14:31256791-31257626(+)
ENSMUSG00000027678	Ncoa3	chr2	+	166068328	166068548	166068331	166068548	166067561	166067645	2908	19121714	1991222	155713	15191316	53	50	0.127986	0.716614	0.485,0.557,0.572,0.375	0.485,0.199,0.337,0.434	0.134	chr2:166067645-166068329(+)	chr2:166067645-166068332(+)
ENSMUSG00000001054	Rmnd5b	chr11	-	51624474	51624646	51624474	51624577	51625668	51625834	2909	1311149	57685145	1181011	73676752	100	50	0.186309	0.891132	0.102,0.075,0.121,0.091	0.07,0.056,0.069,0.096	0.024	chr11:51624646-51625669(-)	chr11:51624577-51625669(-)
ENSMUSG00000002718	Cse1l	chr2	+	166929784	166929987	166929894	166929987	166928957	166929023	2910	441411527494	5311	427555456411	1021	100	50	1	1	0.978,0.986,0.996,0.996	0.995,1.0,0.991,0.995	-0.006	chr2:166929023-166929785(+)	chr2:166929023-166929895(+)
ENSMUSG00000026074	Map4k4	chr1	+	40000530	40000749	40000623	40000749	39999887	39999974	2914	16203915	1615187	15272825	1212138	100	50	0.341093	1	0.333,0.4,0.52,0.517	0.385,0.529,0.519,0.61	-0.068	chr1:39999974-40000531(+)	chr1:39999974-40000624(+)
ENSMUSG00000026074	Map4k4	chr1	+	40003756	40003987	40003762	40003987	40000530	40000749	2915	1212814	0	9442	1110	56	50	1	1	1.0,1.0,1.0,1.0	0.889,0.781,0.781,1.0	0.137	chr1:40000749-40003757(+)	chr1:40000749-40003763(+)
ENSMUSG00000026074	Map4k4	chr1	+	40006670	40006822	40006673	40006822	40004806	40004913	2916	35315143	67511	38362834	109107	53	50	0.175678	0.869154	0.846,0.807,0.906,0.787	0.782,0.791,0.725,0.821	0.057	chr1:40004913-40006671(+)	chr1:40004913-40006674(+)
ENSMUSG00000066979	Bub3	chr7	+	131568504	131568721	131568604	131568721	131568183	131568361	2917	590574754656	2416	717791711689	1652	100	50	1	1	0.993,0.986,0.997,0.982	0.997,0.985,0.986,0.994	-0.001	chr7:131568361-131568505(+)	chr7:131568361-131568605(+)
ENSMUSG00000037031	Tspan15	chr10	-	62189813	62189861	62189813	62189857	62191467	62191584	2921	1142	100	1422	1000	54	50	1	1	1.0,0.481,1.0,1.0	0.481,1.0,1.0,1.0	0	chr10:62189861-62191468(-)	chr10:62189857-62191468(-)
ENSMUSG00000026342	Slc35f5	chr1	+	125589810	125589965	125589838	125589965	125587364	125587455	2923	18353124	2001	32322731	0	78	50	1	1	0.852,1.0,1.0,0.939	1.0,1.0,1.0,1.0	-0.052	chr1:125587455-125589811(+)	chr1:125587455-125589839(+)
ENSMUSG00000025266	Gnl3l	chrX	-	151014020	151014150	151014020	151014089	151017200	151017322	2925	2345	57657862	2903	38465634	100	50	0.387695	1	0.017,0.023,0.025,0.039	0.026,0.089,0.0,0.042	-0.013	chrX:151014150-151017201(-)	chrX:151014089-151017201(-)
ENSMUSG00000026171	Rnf25	chr1	-	74595208	74595301	74595208	74595298	74595630	74595768	2928	28315226	108146	21352540	917810	53	50	0.317273	1	0.725,0.785,0.778,0.803	0.688,0.66,0.747,0.791	0.051	chr1:74595301-74595631(-)	chr1:74595298-74595631(-)
ENSMUSG00000026171	Rnf25	chr1	-	74598692	74598845	74598692	74598792	74599065	74599140	2929	4230	34294136	4233	27342725	100	50	0.241589	1	0.056,0.033,0.035,0.0	0.069,0.029,0.053,0.057	-0.021	chr1:74598845-74599066(-)	chr1:74598792-74599066(-)
ENSMUSG00000028944	Prkag2	chr5	-	24889081	24889188	24889081	24889185	24908322	24908392	2933	91478	12192815	10936	28141115	53	50	0.457092	1	0.414,0.41,0.191,0.335	0.252,0.378,0.205,0.274	0.06	chr5:24889188-24908323(-)	chr5:24889185-24908323(-)
ENSMUSG00000039844	Rapgef1	chr2	+	29710152	29710308	29710155	29710308	29707197	29707400	2934	100	1000	1000	0	53	50	1	1	0.0,1.0,NA,NA	1.0,NA,NA,NA	-0.5	chr2:29707400-29710153(+)	chr2:29707400-29710156(+)
ENSMUSG00000039844	Rapgef1	chr2	+	29733419	29733762	29733576	29733762	29732826	29732919	2935	8953	135117110101	6223	78878183	100	50	0.224299	0.978646	0.029,0.037,0.022,0.015	0.037,0.011,0.012,0.018	0.006	chr2:29732919-29733420(+)	chr2:29732919-29733577(+)
ENSMUSG00000025647	Shisa5	chr9	+	109051363	109051453	109051366	109051453	109040869	109041026	2938	2125259	42625050	21131717	70535343	53	50	0.328698	1	0.321,0.276,0.321,0.145	0.221,0.188,0.232,0.272	0.037	chr9:109041026-109051364(+)	chr9:109041026-109051367(+)
ENSMUSG00000027331	Knstrn	chr2	+	118830811	118830969	118830872	118830969	118828958	118829014	2947	157811	1032	36814	201	100	50	0.053385	0.448995	0.882,1.0,0.571,0.733	1.0,0.6,1.0,0.875	-0.072	chr2:118829014-118830812(+)	chr2:118829014-118830873(+)
ENSMUSG00000039041	Adrm1	chr2	+	180175159	180175392	180175242	180175392	180174864	180174946	2952	294384373240	612102	304280268258	12876	100	50	0.37295	1	0.961,0.941,0.949,0.984	0.927,0.946,0.95,0.956	0.014	chr2:180174946-180175160(+)	chr2:180174946-180175243(+)
ENSMUSG00000027569	Mrgbp	chr2	+	180584693	180584871	180584796	180584871	180584405	180584487	2954	43663628	66819077	27463136	53514666	100	50	0.344733	1	0.246,0.289,0.167,0.154	0.203,0.311,0.252,0.214	-0.031	chr2:180584487-180584694(+)	chr2:180584487-180584797(+)
ENSMUSG00000089917	Uckl1	chr2	-	181570132	181570195	181570132	181570180	181570308	181570402	2955	69696558	2345	56565155	2312	65	50	0.228613	0.989823	0.964,0.947,0.926,0.899	0.956,0.935,0.975,0.955	-0.021	chr2:181570195-181570309(-)	chr2:181570180-181570309(-)
ENSMUSG00000000823	Zfp512b	chr2	-	181587980	181588103	181587980	181588079	181588213	181588306	2956	5244	19321914	2552	22162020	74	50	0.975089	1	0.151,0.041,0.125,0.162	0.058,0.174,0.145,0.063	0.01	chr2:181588103-181588214(-)	chr2:181588079-181588214(-)
ENSMUSG00000036833	Pnpla7	chr2	+	24987113	24987199	24987118	24987199	24983489	24983649	2960	121	38625432	101	40403741	55	50	1	1	0.0,0.014,0.033,0.028	0.0,0.022,0.0,0.022	0.008	chr2:24983649-24987114(+)	chr2:24983649-24987119(+)
ENSMUSG00000036833	Pnpla7	chr2	+	24998621	24998759	24998678	24998759	24997226	24997350	2961	1051199994	4553	84708480	5243	100	50	0.982443	1	0.929,0.922,0.908,0.94	0.894,0.946,0.913,0.93	0.004	chr2:24997350-24998622(+)	chr2:24997350-24998679(+)
ENSMUSG00000026924	Sec16a	chr2	-	26416116	26416257	26416116	26416228	26416370	26416427	2963	4263	26334037	4523	48343929	79	50	0.68017	1	0.089,0.037,0.087,0.049	0.05,0.085,0.031,0.061	0.009	chr2:26416257-26416371(-)	chr2:26416228-26416371(-)
ENSMUSG00000021235	Coq6	chr12	+	84371403	84371558	84371450	84371558	84371107	84371170	2965	131687	61235548	1011146	60554152	97	50	0.483243	1	0.099,0.264,0.07,0.07	0.079,0.093,0.15,0.056	0.031	chr12:84371170-84371404(+)	chr12:84371170-84371451(+)
ENSMUSG00000025283	Sat1	chrX	-	155213896	155213958	155213896	155213937	155214032	155214134	2966	1820715	284329211201	20161215	240229193152	71	50	0.167044	0.844298	0.043,0.041,0.023,0.05	0.055,0.047,0.042,0.065	-0.013	chrX:155213958-155214033(-)	chrX:155213937-155214033(-)
ENSMUSG00000006315	Tmem147	chr7	-	30727986	30728129	30727986	30728108	30728204	30728289	2967	262	344392469359	1123	340396364346	71	50	1	1	0.0,0.004,0.009,0.004	0.002,0.002,0.004,0.006	0.001	chr7:30728129-30728205(-)	chr7:30728108-30728205(-)
ENSMUSG00000006315	Tmem147	chr7	-	30728656	30728741	30728656	30728716	30729201	30729271	2968	8685	348394354340	8592	326362324308	75	50	0.90363	1	0.015,0.01,0.015,0.01	0.016,0.009,0.018,0.004	0.001	chr7:30728741-30729202(-)	chr7:30728716-30729202(-)
ENSMUSG00000060279	Ap2a1	chr7	-	44909219	44909374	44909219	44909321	44909698	44909828	2969	91065	169146160120	3315	139125114126	100	50	0.0125931	0.171657	0.026,0.033,0.018,0.02	0.011,0.012,0.004,0.019	0.013	chr7:44909374-44909699(-)	chr7:44909321-44909699(-)
ENSMUSG00000003316	Glg1	chr8	-	111160620	111160810	111160620	111160741	111161425	111161533	2970	11566	989311184	1017611	851165993	100	50	0.0302551	0.314732	0.053,0.026,0.026,0.034	0.056,0.068,0.048,0.056	-0.022	chr8:111160810-111161426(-)	chr8:111160741-111161426(-)
ENSMUSG00000038671	Arfrp1	chr2	-	181364013	181364195	181364013	181364096	181364310	181364398	2971	5759	88114105111	81846	86897580	100	50	0.040679	0.38006	0.028,0.03,0.023,0.039	0.044,0.092,0.026,0.036	-0.02	chr2:181364195-181364311(-)	chr2:181364096-181364311(-)
ENSMUSG00000021816	Ppp3cb	chr14	-	20509415	20509500	20509415	20509497	20515522	20515600	2973	917810573	981128699	79977077	81937384	53	50	0.464443	1	0.467,0.397,0.535,0.41	0.479,0.496,0.475,0.464	-0.026	chr14:20509500-20515523(-)	chr14:20509497-20515523(-)
ENSMUSG00000039382	Wdr45	chrX	+	7725739	7726036	7725930	7726036	7724186	7724291	2976	9738	54716149	51252	46314546	100	50	0.622207	1	0.077,0.047,0.024,0.075	0.052,0.162,0.053,0.021	-0.016	chrX:7724291-7725740(+)	chrX:7724291-7725931(+)
ENSMUSG00000039382	Wdr45	chrX	+	7725857	7726036	7725930	7726036	7724186	7724291	2978	7738	54716149	5952	46314546	100	50	0.735232	1	0.061,0.047,0.024,0.075	0.052,0.127,0.053,0.021	-0.011	chrX:7724291-7725858(+)	chrX:7724291-7725931(+)
ENSMUSG00000039382	Wdr45	chrX	+	7725877	7726036	7725930	7726036	7724186	7724291	2979	7738	54716149	5952	46314546	100	50	0.735232	1	0.061,0.047,0.024,0.075	0.052,0.127,0.053,0.021	-0.011	chrX:7724291-7725878(+)	chrX:7724291-7725931(+)
ENSMUSG00000039382	Wdr45	chrX	+	7726197	7726292	7726248	7726292	7725930	7726036	2980	159159134156	4545	135126135126	2100	100	50	0.000228959	0.0095435	0.952,0.941,0.944,0.94	0.971,0.984,1.0,1.0	-0.045	chrX:7726036-7726198(+)	chrX:7726036-7726249(+)
ENSMUSG00000039382	Wdr45	chrX	+	7726877	7727086	7726967	7727086	7726685	7726765	2981	164141160140	101	139133111122	0	100	50	1	1	1.0,0.986,1.0,0.986	1.0,1.0,1.0,1.0	-0.007	chrX:7726765-7726878(+)	chrX:7726765-7726968(+)
ENSMUSG00000039382	Wdr45	chrX	+	7727169	7727271	7727211	7727271	7726877	7727086	2983	137144156137	2323	144115123140	1313	92	50	0.657337	1	0.974,0.963,0.977,0.961	0.987,0.954,0.985,0.962	-0.003	chrX:7727086-7727170(+)	chrX:7727086-7727212(+)
ENSMUSG00000039382	Wdr45	chrX	+	7727181	7727271	7727211	7727271	7726877	7727086	2984	45463447	2323	40403537	1313	80	50	0.68249	1	0.934,0.906,0.914,0.907	0.962,0.893,0.956,0.885	-0.009	chrX:7727086-7727182(+)	chrX:7727086-7727212(+)
ENSMUSG00000031156	Slc35a2	chrX	+	7892139	7892867	7892729	7892867	7889611	7889763	2986	85729383	1001	771016781	1301	100	50	0.435234	1	0.977,1.0,1.0,0.976	0.975,0.944,1.0,0.976	0.014	chrX:7889763-7892140(+)	chrX:7889763-7892730(+)
ENSMUSG00000033467	Crlf2	chr5	-	109555506	109555660	109555506	109555627	109556018	109556181	2987	811104	13414510	7362	4028289	83	50	0.056117	0.458531	0.27,0.139,0.118,0.194	0.095,0.061,0.114,0.118	0.083	chr5:109555660-109556019(-)	chr5:109555627-109556019(-)
ENSMUSG00000031167	Rbm3	chrX	-	8143246	8143332	8143246	8143329	8143657	8143751	2989	5801089573653	6921529705823	725598528621	934729711820	53	50	0.857685	1	0.442,0.402,0.434,0.428	0.423,0.436,0.412,0.417	0.005	chrX:8143332-8143658(-)	chrX:8143329-8143658(-)
ENSMUSG00000008496	Pou2f2	chr7	-	25093484	25093686	25093484	25093550	25094789	25094856	2991	25211624	1021	30263426	1000	100	50	0.863787	1	0.926,1.0,0.8,0.923	0.938,1.0,1.0,1.0	-0.072	chr7:25093686-25094790(-)	chr7:25093550-25094790(-)
ENSMUSG00000008496	Pou2f2	chr7	-	25097653	25097815	25097653	25097767	25099951	25100043	2992	2024	18458	441	113107	98	50	0.715206	1	0.054,0.0,0.169,0.203	0.0,0.405,0.169,0.068	-0.054	chr7:25097815-25099952(-)	chr7:25097767-25099952(-)
ENSMUSG00000008496	Pou2f2	chr7	-	25116037	25116220	25116037	25116154	25120840	25120897	2993	1554	1051114	8202	89199	100	50	0.413504	1	0.048,0.333,0.185,0.125	0.333,0.1,0.0,0.1	0.04	chr7:25116220-25120841(-)	chr7:25116154-25120841(-)
ENSMUSG00000038095	Sbno1	chr5	-	124410069	124410382	124410069	124410379	124413184	124413289	2994	1718189	3123	14151518	6310	53	50	0.843517	1	0.842,0.944,0.895,0.739	0.688,0.825,0.934,1.0	-0.007	chr5:124410382-124413185(-)	chr5:124410379-124413185(-)
ENSMUSG00000038095	Sbno1	chr5	-	124410069	124410382	124410069	124410379	124414398	124414527	2995	35263330	9785	26284023	29109	53	50	0.912971	1	0.786,0.778,0.796,0.85	0.925,0.746,0.791,0.707	0.01	chr5:124410382-124414399(-)	chr5:124410379-124414399(-)
ENSMUSG00000001911	Nfix	chr8	-	84726468	84726605	84726468	84726602	84727123	84727244	2996	51333540	861112	43486436	111057	53	50	0.295688	1	0.857,0.838,0.75,0.759	0.787,0.819,0.924,0.829	-0.039	chr8:84726605-84727124(-)	chr8:84726602-84727124(-)
ENSMUSG00000027947	Il6ra	chr3	-	89878848	89878895	89878848	89878892	89885901	89886043	2998	33342827	58525235	28323225	54265039	53	50	0.555899	1	0.349,0.382,0.337,0.421	0.328,0.537,0.376,0.377	-0.032	chr3:89878895-89885902(-)	chr3:89878892-89885902(-)
ENSMUSG00000042167	Tent2	chr13	-	93174639	93174718	93174639	93174706	93175518	93175610	3000	998410397	57534963	1219795131	37403661	62	50	0.00523723	0.0962919	0.583,0.561,0.629,0.554	0.725,0.662,0.68,0.634	-0.094	chr13:93174718-93175519(-)	chr13:93174706-93175519(-)
ENSMUSG00000040859	Bsdc1	chr4	+	129466822	129466990	129466913	129466990	129465229	129465346	3005	698610682	3024	911006692	4111	100	50	0.522622	1	0.92,1.0,0.964,0.911	0.919,0.98,0.971,0.979	-0.014	chr4:129465346-129466823(+)	chr4:129465346-129466914(+)
ENSMUSG00000036391	Sec24a	chr11	-	51729451	51729578	51729451	51729575	51731802	51731905	3006	16101216	6624	11171612	5330	53	50	0.174167	0.862759	0.716,0.611,0.85,0.791	0.675,0.842,0.834,1.0	-0.096	chr11:51729578-51731803(-)	chr11:51729575-51731803(-)
ENSMUSG00000015290	Ubl4a	chrX	-	74367700	74368010	74367700	74367909	74368152	74368258	3008	1061310	269264292275	41578	256294234276	100	50	0.67924	1	0.018,0.011,0.022,0.018	0.008,0.025,0.015,0.014	0.002	chrX:74368010-74368153(-)	chrX:74367909-74368153(-)
ENSMUSG00000034793	G6pc3	chr11	+	102192748	102193226	102193084	102193226	102192472	102192563	3009	270228298285	2210	335240238264	2112	100	50	1	1	0.985,0.983,0.993,1.0	0.988,0.992,0.992,0.985	0.001	chr11:102192563-102192749(+)	chr11:102192563-102193085(+)
ENSMUSG00000052423	B4galt3	chr1	+	171271706	171272001	171271827	171272001	171271202	171271373	3010	82868869	3342	65736569	8873	100	50	0.00349309	0.0714257	0.932,0.935,0.917,0.945	0.802,0.82,0.823,0.92	0.091	chr1:171271373-171271707(+)	chr1:171271373-171271828(+)
ENSMUSG00000052423	B4galt3	chr1	+	171271706	171272001	171271909	171272001	171271202	171271373	3011	71859875	1	84907374	100	100	50	1	1	1.0,1.0,1.0,0.974	1.0,0.978,1.0,1.0	-0.001	chr1:171271373-171271707(+)	chr1:171271373-171271910(+)
ENSMUSG00000052423	B4galt3	chr1	+	171271827	171272001	171271909	171272001	171271202	171271373	3012	37466547	1	58654449	100	100	50	1	1	1.0,1.0,1.0,0.959	1.0,0.97,1.0,1.0	-0.003	chr1:171271373-171271828(+)	chr1:171271373-171271910(+)
ENSMUSG00000036893	Ehmt1	chr2	-	24863771	24863908	24863771	24863905	24877454	24877626	3014	50376548	2211	32445051	5321	53	50	0.0967843	0.616084	0.959,0.946,0.984,0.978	0.858,0.933,0.959,0.98	0.034	chr2:24863908-24877455(-)	chr2:24863905-24877455(-)
ENSMUSG00000036893	Ehmt1	chr2	-	24863771	24863929	24863771	24863905	24877454	24877626	3015	12753	2211	16161316	5321	74	50	0.596207	1	0.802,0.703,0.772,0.67	0.684,0.783,0.815,0.915	-0.062	chr2:24863929-24877455(-)	chr2:24863905-24877455(-)
ENSMUSG00000036893	Ehmt1	chr2	-	24863771	24863929	24863771	24863908	24877454	24877626	3016	11753	49376548	16151316	32435051	71	50	0.000126035	0.00607583	0.137,0.118,0.051,0.042	0.26,0.197,0.155,0.181	-0.111	chr2:24863929-24877455(-)	chr2:24863908-24877455(-)
ENSMUSG00000023262	Acy1	chr9	-	106435783	106436009	106435783	106435860	106436125	106436220	3019	2122	83828380	10	69693759	100	50	1	1	0.012,0.006,0.012,0.012	0.0,0.0,0.013,0.0	0.007	chr9:106436009-106436126(-)	chr9:106435860-106436126(-)
ENSMUSG00000023262	Acy1	chr9	-	106436125	106436800	106436125	106436220	106436888	106436953	3020	70656458	1101	51483445	0	100	50	1	1	0.972,0.97,1.0,0.967	1.0,1.0,1.0,1.0	-0.023	chr9:106436800-106436889(-)	chr9:106436220-106436889(-)
ENSMUSG00000023262	Acy1	chr9	-	106437628	106437737	106437628	106437733	106438132	106438319	3021	36423351	34363442	35392634	26264026	54	50	0.885563	1	0.495,0.519,0.473,0.529	0.555,0.581,0.376,0.548	-0.011	chr9:106437737-106438133(-)	chr9:106437733-106438133(-)
ENSMUSG00000026821	Ralgds	chr2	+	28542854	28542950	28542890	28542950	28542289	28542483	3022	79193	1120	3777	1633	86	50	0.000148772	0.00668289	0.803,0.84,0.847,1.0	0.636,0.404,0.576,0.576	0.325	chr2:28542483-28542855(+)	chr2:28542483-28542891(+)
ENSMUSG00000026821	Ralgds	chr2	+	28543553	28543747	28543638	28543747	28542890	28542950	3023	17122617	200	7101420	10	100	50	1	1	1.0,0.75,1.0,1.0	1.0,1.0,0.875,1.0	-0.031	chr2:28542950-28543554(+)	chr2:28542950-28543639(+)
ENSMUSG00000044876	Zfp444	chr7	+	6183789	6184202	6183861	6184202	6173981	6174101	3025	4622	1017195	3710	15111112	100	50	0.58132	1	0.167,0.15,0.05,0.167	0.091,0.241,0.043,0.0	0.04	chr7:6174101-6183790(+)	chr7:6174101-6183862(+)
ENSMUSG00000029416	Slc15a4	chr5	-	127603780	127603851	127603780	127603798	127604110	127604188	3027	30373245	1124	45442533	2103	100	50	0.4058	1	0.938,0.949,0.889,0.849	0.918,0.957,1.0,0.846	-0.024	chr5:127603851-127604111(-)	chr5:127603798-127604111(-)
ENSMUSG00000029416	Slc15a4	chr5	-	127604537	127604706	127604537	127604648	127608771	127609061	3028	18231726	20202813	41544723	5241019	100	50	0.00337019	0.0708636	0.31,0.365,0.233,0.5	0.804,0.529,0.701,0.377	-0.251	chr5:127604706-127608772(-)	chr5:127604648-127608772(-)
ENSMUSG00000022488	Nckap1l	chr15	+	103464505	103464662	103464545	103464662	103464365	103464414	3029	414377422306	10	402376362332	1000	90	50	1	1	1.0,1.0,0.996,1.0	0.996,1.0,1.0,1.0	0	chr15:103464414-103464506(+)	chr15:103464414-103464546(+)
ENSMUSG00000009555	Cdk9	chr2	-	32710476	32710791	32710476	32710567	32712030	32712112	3031	41513633	172154189176	34342312	183171188202	100	50	0.000531512	0.0191006	0.106,0.142,0.087,0.086	0.085,0.09,0.058,0.029	0.04	chr2:32710791-32712031(-)	chr2:32710567-32712031(-)
ENSMUSG00000038593	Tctn1	chr5	-	122246484	122246634	122246484	122246571	122247919	122248045	3038	13171918	0	14151717	1	100	50	1	1	1.0,1.0,1.0,1.0	1.0,1.0,1.0,0.895	0.026	chr5:122246634-122247920(-)	chr5:122246571-122247920(-)
ENSMUSG00000035299	Mid1	chrX	+	169985896	169986097	169985935	169986097	169984998	169985142	3040	4423	9181922	1231	1191111	89	50	0.516032	1	0.2,0.111,0.056,0.071	0.049,0.111,0.133,0.049	0.024	chrX:169985142-169985897(+)	chrX:169985142-169985936(+)
ENSMUSG00000066037	Hnrnpr	chr4	+	136314086	136314255	136314089	136314255	136310967	136311089	3041	47425444	32474446	38373435	34472930	53	50	0.709409	1	0.581,0.457,0.537,0.474	0.513,0.426,0.525,0.524	0.015	chr4:136311089-136314087(+)	chr4:136311089-136314090(+)
ENSMUSG00000027998	Plrg1	chr3	+	83070596	83070736	83070622	83070736	83069692	83069801	3043	197188218203	0	169171175187	110	76	50	1	1	1.0,1.0,1.0,1.0	1.0,0.991,0.991,1.0	0.004	chr3:83069801-83070597(+)	chr3:83069801-83070623(+)
ENSMUSG00000040479	Dgkz	chr2	-	91942627	91942814	91942627	91942684	91944021	91944099	3044	11865	340304284269	7652	254282203252	100	50	0.876118	1	0.016,0.013,0.01,0.009	0.014,0.011,0.012,0.004	0.002	chr2:91942814-91944022(-)	chr2:91942684-91944022(-)
ENSMUSG00000059689	Zfp637	chr6	+	117844982	117845955	117845024	117845955	117843252	117843392	3046	2372	33435647	3273	38433841	92	50	0.649434	1	0.032,0.037,0.064,0.023	0.041,0.025,0.091,0.038	-0.01	chr6:117843392-117844983(+)	chr6:117843392-117845025(+)
ENSMUSG00000027944	Hax1	chr3	-	89997386	89997574	89997386	89997565	89997737	89998003	3047	177170192177	86198	186189183159	1113810	59	50	0.897711	1	0.949,0.96,0.895,0.949	0.935,0.925,0.951,0.931	0.003	chr3:89997574-89997738(-)	chr3:89997565-89997738(-)
ENSMUSG00000056394	Lig1	chr7	+	13286557	13286684	13286560	13286684	13285256	13285392	3048	475458463434	223	415402367386	1041	53	50	1	1	1.0,0.995,0.995,0.993	0.997,1.0,0.989,0.997	0	chr7:13285392-13286558(+)	chr7:13285392-13286561(+)
ENSMUSG00000056394	Lig1	chr7	+	13289387	13289495	13289393	13289495	13288663	13288759	3049	26345634	319253257280	41382945	245254193230	56	50	0.159385	0.821445	0.068,0.107,0.163,0.098	0.13,0.118,0.118,0.149	-0.02	chr7:13288759-13289388(+)	chr7:13288759-13289394(+)
ENSMUSG00000021432	Slc35b3	chr13	-	38939874	38940045	38939874	38939972	38943058	38943166	3053	1000	16132111	11	913912	100	50	1	1	0.03,0.0,0.0,0.0	0.0,0.0,0.053,0.04	-0.016	chr13:38940045-38943059(-)	chr13:38939972-38943059(-)
ENSMUSG00000044551	9930012K11Rik	chr14	-	70155849	70155956	70155849	70155953	70156160	70156276	3054	4524	2333	104	2934	53	50	0.000746134	0.0243758	0.654,0.611,0.386,0.557	0.0,0.095,0.0,0.485	0.407	chr14:70155956-70156161(-)	chr14:70155953-70156161(-)
ENSMUSG00000032567	Aste1	chr9	+	105396797	105397858	105397624	105397858	105396544	105396705	3058	1015259	0	10251010	1	100	50	1	1	1.0,1.0,1.0,1.0	1.0,1.0,1.0,0.833	0.042	chr9:105396705-105396798(+)	chr9:105396705-105397625(+)
ENSMUSG00000019823	Mical1	chr10	+	41479325	41479499	41479394	41479499	41478962	41479067	3061	10231610	56524952	1111179	45373132	100	50	0.553426	1	0.082,0.181,0.14,0.088	0.109,0.129,0.215,0.123	-0.021	chr10:41479067-41479326(+)	chr10:41479067-41479395(+)
ENSMUSG00000040363	Bcor	chrX	-	12048302	12048647	12048302	12048545	12048994	12049252	3062	36442419	54446558	55616848	44293544	100	50	3.14277e-06	0.00032693	0.25,0.333,0.156,0.141	0.385,0.513,0.493,0.353	-0.216	chrX:12048647-12048995(-)	chrX:12048545-12048995(-)
ENSMUSG00000031833	Mast3	chr8	-	70789847	70789920	70789847	70789917	70789996	70790085	3063	75726439	1612144	51454443	119119	53	50	0.537235	1	0.816,0.85,0.812,0.902	0.814,0.825,0.791,0.818	0.033	chr8:70789920-70789997(-)	chr8:70789917-70789997(-)
ENSMUSG00000062203	Gspt1	chr16	-	11238871	11239099	11238871	11239096	11240665	11240707	3065	169156183179	7965119105	164173134133	741067768	53	50	0.922486	1	0.669,0.694,0.592,0.617	0.676,0.606,0.621,0.649	0.005	chr16:11239099-11240666(-)	chr16:11239096-11240666(-)
ENSMUSG00000025484	Bet1l	chr7	-	140854764	140854937	140854764	140854821	140855073	140855165	3068	3333	37476547	6446	26445050	100	50	0.0590913	0.468285	0.039,0.031,0.023,0.031	0.103,0.043,0.038,0.057	-0.029	chr7:140854937-140855074(-)	chr7:140854821-140855074(-)
ENSMUSG00000038324	Trpc4ap	chr2	-	155643391	155643468	155643391	155643450	155644927	155645059	3073	2012	281265270255	331	244280260231	68	50	1	1	0.005,0.0,0.003,0.006	0.0,0.008,0.008,0.003	-0.001	chr2:155643468-155644928(-)	chr2:155643450-155644928(-)
ENSMUSG00000038324	Trpc4ap	chr2	-	155650418	155650585	155650418	155650561	155653492	155653678	3074	278267285231	5927	287236247222	138127	74	50	0.015399	0.200898	0.974,0.952,0.99,0.957	0.937,0.952,0.933,0.955	0.024	chr2:155650585-155653493(-)	chr2:155650561-155653493(-)
ENSMUSG00000006154	Eps8l1	chr7	+	4470182	4470432	4470282	4470432	4469880	4470042	3077	10	5372	30	2610	100	50	1	1	0.0,0.0,0.067,0.0	NA,0.0,0.2,0.0	-0.05	chr7:4470042-4470183(+)	chr7:4470042-4470283(+)
ENSMUSG00000036916	Zfp280c	chrX	-	48578379	48578556	48578379	48578529	48588702	48588749	3078	27292539	3735	1315117	61285	77	50	9.28831e-06	0.000734333	0.854,0.729,0.844,0.835	0.585,0.448,0.472,0.476	0.32	chrX:48578556-48588703(-)	chrX:48578529-48588703(-)
ENSMUSG00000029516	Cit	chr5	+	115981649	115981812	115981694	115981812	115979761	115979869	3080	5303	22301627	7745	21101422	95	50	0.00285601	0.0627211	0.107,0.05,0.0,0.055	0.149,0.269,0.131,0.107	-0.111	chr5:115979869-115981650(+)	chr5:115979869-115981695(+)
ENSMUSG00000029516	Cit	chr5	+	116005781	116006091	116005784	116006091	115997673	115997853	3081	1213810	913154	103711	18151412	53	50	0.0525333	0.447788	0.557,0.485,0.335,0.702	0.344,0.159,0.321,0.464	0.198	chr5:115997853-116005782(+)	chr5:115997853-116005785(+)
ENSMUSG00000022498	Txndc11	chr16	-	11128486	11128705	11128486	11128703	11134267	11134650	3083	23	69595665	1020	81566352	52	50	1	1	0.0,0.0,0.033,0.042	0.012,0.0,0.03,0.0	0.008	chr16:11128705-11134268(-)	chr16:11128703-11134268(-)
ENSMUSG00000038733	Wdr26	chr1	-	181203023	181203224	181203023	181203160	181209050	181209107	3087	2593	65403943	11561	50455345	100	50	0.766829	1	0.015,0.059,0.103,0.034	0.099,0.053,0.054,0.011	-0.002	chr1:181203224-181209051(-)	chr1:181203160-181209051(-)
ENSMUSG00000040621	Gemin8	chrX	+	166180352	166180809	166180445	166180809	166178791	166178830	3088	72589665	3152	57617591	201	100	50	0.00350377	0.0714257	0.923,0.967,0.906,0.942	1.0,0.938,1.0,0.978	-0.044	chrX:166178830-166180353(+)	chrX:166178830-166180446(+)
ENSMUSG00000051736	Fam229b	chr10	-	39122176	39122335	39122176	39122332	39132246	39132378	3091	5733	202	334	1001	53	50	0.614	1	1.0,0.768,1.0,0.586	0.0,1.0,1.0,0.791	0.141	chr10:39122335-39132247(-)	chr10:39122332-39132247(-)
ENSMUSG00000027184	Caprin1	chr2	-	103773733	103773795	103773733	103773744	103775416	103775525	3093	1365128015311254	3211	1076114910371008	4003	100	50	1	1	0.996,0.997,0.999,0.998	0.993,1.0,1.0,0.994	0.001	chr2:103773795-103775417(-)	chr2:103773744-103775417(-)
ENSMUSG00000041679	Lrrc29	chr8	-	105315075	105316068	105315075	105316022	105323264	105323366	3095	1401	5804	4232	1200	96	50	1	1	0.094,0.207,NA,0.115	0.676,0.342,1.0,1.0	-0.616	chr8:105316068-105323265(-)	chr8:105316022-105323265(-)
ENSMUSG00000029673	Auts2	chr5	-	131474922	131475176	131474922	131475173	131476552	131477023	3096	1020	210	2012	1003	53	50	1	1	1.0,0.0,0.654,NA	0.654,NA,1.0,0.386	-0.129	chr5:131475176-131476553(-)	chr5:131475173-131476553(-)
ENSMUSG00000041264	Uspl1	chr5	+	149193839	149194440	149193897	149194440	149188344	149188473	3097	66385772	3621	52716273	3230	100	50	0.235167	1	0.917,0.76,0.934,0.973	0.897,0.947,0.912,1.0	-0.043	chr5:149188473-149193840(+)	chr5:149188473-149193898(+)
ENSMUSG00000027012	Dync1i2	chr2	+	71262647	71263303	71262650	71263303	71260821	71260947	3099	96110127122	5957	921278882	111125	53	50	0.388881	1	0.948,0.92,0.96,0.943	0.888,0.916,0.976,0.939	0.013	chr2:71260947-71262648(+)	chr2:71260947-71262651(+)
ENSMUSG00000015149	Sirt2	chr7	+	28787916	28788660	28787919	28788660	28787761	28787828	3102	13312812288	11144	118129113121	6534	53	50	0.784088	1	0.919,0.992,0.966,0.954	0.949,0.961,0.973,0.966	-0.005	chr7:28787828-28787917(+)	chr7:28787828-28787920(+)
ENSMUSG00000030584	Dpf1	chr7	+	29316213	29316325	29316243	29316325	29315623	29315736	3104	20	251	0	220	80	50	1	1	NA,0.0,0.2,0.0	NA,0.0,0.0,NA	0.067	chr7:29315736-29316214(+)	chr7:29315736-29316244(+)
ENSMUSG00000074063	Osgin1	chr8	+	119444956	119446256	119444958	119446256	119443191	119443283	3111	2210	0	2034	2000	52	50	1	1	1.0,1.0,1.0,NA	0.49,NA,1.0,1.0	0.17	chr8:119443283-119444957(+)	chr8:119443283-119444959(+)
ENSMUSG00000037773	Pced1a	chr2	-	130422224	130422704	130422224	130422375	130422812	130422892	3112	12151714	1251	23221523	534	100	50	0.902194	1	0.857,0.789,0.63,0.875	1.0,0.688,0.714,0.742	0.002	chr2:130422704-130422813(-)	chr2:130422375-130422813(-)
ENSMUSG00000068329	Htra2	chr6	-	83052697	83052803	83052697	83052726	83053037	83053070	3115	534553585560	31182417	479518400476	21251610	100	50	0.74573	1	0.896,0.939,0.924,0.943	0.919,0.912,0.926,0.96	-0.004	chr6:83052803-83053038(-)	chr6:83052726-83053038(-)
ENSMUSG00000089682	Bcl2l2	chr14	+	54884373	54884813	54884624	54884813	54883796	54883884	3116	59736540	1001	44534945	2	100	50	1	1	0.967,1.0,1.0,0.952	1.0,1.0,1.0,0.918	0	chr14:54883884-54884374(+)	chr14:54883884-54884625(+)
ENSMUSG00000060601	Nr1h2	chr7	-	44551954	44552245	44551954	44552236	44552506	44552620	3118	657410665	90729953	85836967	63585336	59	50	0.0109808	0.155559	0.38,0.466,0.476,0.51	0.533,0.548,0.525,0.612	-0.096	chr7:44552245-44552507(-)	chr7:44552236-44552507(-)
ENSMUSG00000060601	Nr1h2	chr7	-	44551954	44552343	44551954	44552236	44552506	44552620	3119	43443431	90729953	39452525	63585336	100	50	0.113085	0.671211	0.193,0.234,0.147,0.226	0.236,0.28,0.191,0.258	-0.041	chr7:44552343-44552507(-)	chr7:44552236-44552507(-)
ENSMUSG00000060601	Nr1h2	chr7	-	44551954	44552343	44551954	44552245	44552506	44552620	3120	37411828	50658857	22341217	65665558	100	50	0.103605	0.644312	0.27,0.24,0.093,0.197	0.145,0.205,0.098,0.128	0.056	chr7:44552343-44552507(-)	chr7:44552245-44552507(-)
ENSMUSG00000060601	Nr1h2	chr7	-	44552696	44552754	44552696	44552719	44553578	44553708	3121	185159193134	1621	156156160143	3252	85	50	0.492686	1	0.991,0.94,0.983,0.987	0.968,0.979,0.95,0.977	0.007	chr7:44552754-44553579(-)	chr7:44552719-44553579(-)
ENSMUSG00000060601	Nr1h2	chr7	-	44552696	44552757	44552696	44552719	44553578	44553708	3122	131119127108	1621	125113120107	3252	88	50	0.551516	1	0.987,0.918,0.973,0.984	0.959,0.97,0.932,0.968	0.008	chr7:44552757-44553579(-)	chr7:44552719-44553579(-)
ENSMUSG00000060601	Nr1h2	chr7	-	44552696	44552757	44552696	44552754	44553578	44553708	3123	45453840	998510466	46324239	77758275	53	50	0.638394	1	0.3,0.333,0.256,0.364	0.36,0.287,0.326,0.329	-0.012	chr7:44552757-44553579(-)	chr7:44552754-44553579(-)
ENSMUSG00000008845	Cd163	chr6	+	124328961	124329097	124329044	124329097	124327897	124327987	3124	512	3431	7062	4023	100	50	1	1	0.0,0.385,0.143,0.5	0.467,NA,0.6,0.25	-0.182	chr6:124327987-124328962(+)	chr6:124327987-124329045(+)
ENSMUSG00000031903	Pla2g15	chr8	+	106161083	106161308	106161208	106161308	106160580	106160679	3128	12610210188	4738	113986193	8567	100	50	0.321787	1	0.94,0.879,0.944,0.846	0.876,0.907,0.836,0.869	0.03	chr8:106160679-106161084(+)	chr8:106160679-106161209(+)
ENSMUSG00000032127	Vps11	chr9	-	44356227	44356453	44356227	44356429	44358068	44358316	3129	0	75846865	100	62676564	74	50	1	1	0.0,0.0,0.0,0.0	0.0,0.01,0.0,0.0	-0.003	chr9:44356453-44358069(-)	chr9:44356429-44358069(-)
ENSMUSG00000059070	Rpl18	chr7	+	45720293	45720487	45720437	45720487	45719919	45720018	3131	9.0971e+17	1203	8456876079198282	4202	100	50	1	1	1.0,1.0,1.0,0.999	0.999,1.0,1.0,1.0	0	chr7:45720018-45720294(+)	chr7:45720018-45720438(+)
ENSMUSG00000072258	Taf1a	chr1	+	183400581	183400801	183400602	183400801	183397779	183397893	3132	1000	21202520	100	2021229	71	50	1	1	0.032,0.0,0.0,0.0	0.0,0.032,0.0,0.0	0	chr1:183397893-183400582(+)	chr1:183397893-183400603(+)
ENSMUSG00000020654	Adcy3	chr12	+	4208576	4208661	4208579	4208661	4206912	4206978	3135	169154	5351	71165	3122	53	50	0.493233	1	0.751,0.739,0.739,0.791	0.688,0.912,0.739,0.702	-0.005	chr12:4206978-4208577(+)	chr12:4206978-4208580(+)
ENSMUSG00000027933	Ints3	chr3	-	90392075	90392142	90392075	90392105	90392211	90392368	3136	2	11611114294	1100	908611283	87	50	1	1	0.0,0.0,0.0,0.012	0.006,0.007,0.0,0.0	0	chr3:90392142-90392212(-)	chr3:90392105-90392212(-)
ENSMUSG00000031388	Naa10	chrX	-	73916872	73917195	73916872	73917190	73917842	73917927	3140	152184139137	14131015	11710612197	13121112	55	50	0.291522	1	0.908,0.928,0.927,0.893	0.891,0.889,0.909,0.88	0.022	chrX:73917195-73917843(-)	chrX:73917190-73917843(-)
ENSMUSG00000031388	Naa10	chrX	-	73919501	73919546	73919501	73919540	73919753	73919869	3141	451432467419	6833	444424351346	12152	56	50	0.759403	1	0.985,0.98,0.993,0.992	0.971,0.997,0.984,0.994	0.001	chrX:73919546-73919754(-)	chrX:73919540-73919754(-)
ENSMUSG00000031386	Hcfc1	chrX	-	73947190	73947517	73947190	73947514	73947841	73948286	3142	40594633	124114152123	44314132	7310611096	53	50	0.542549	1	0.233,0.328,0.222,0.202	0.362,0.216,0.26,0.239	-0.023	chrX:73947517-73947842(-)	chrX:73947514-73947842(-)
ENSMUSG00000031386	Hcfc1	chrX	-	73947841	73948418	73947841	73948286	73948901	73949065	3143	84478262	123114155131	91868583	821028798	100	50	4.29896e-06	0.000424844	0.255,0.171,0.209,0.191	0.357,0.297,0.328,0.297	-0.113	chrX:73948418-73948902(-)	chrX:73948286-73948902(-)
ENSMUSG00000031328	Flna	chrX	-	74228320	74228541	74228320	74228524	74228759	74228921	3144	22321823	412376351355	33211920	429350285316	67	50	0.753274	1	0.038,0.06,0.037,0.046	0.054,0.043,0.047,0.045	-0.002	chrX:74228541-74228760(-)	chrX:74228524-74228760(-)
ENSMUSG00000008682	Rpl10	chrX	+	74271360	74271718	74271659	74271718	74270978	74271024	3146	1061319898	9737979394468376	10713010787	8312862071997234	100	50	1	1	0.005,0.007,0.005,0.006	0.006,0.007,0.007,0.006	-0.001	chrX:74271024-74271361(+)	chrX:74271024-74271660(+)
ENSMUSG00000009995	Taz	chrX	+	74288447	74288513	74288450	74288513	74288177	74288219	3148	148198	67497042	812118	55556549	53	50	0.369846	1	0.165,0.133,0.204,0.152	0.121,0.171,0.138,0.133	0.023	chrX:74288219-74288448(+)	chrX:74288219-74288451(+)
ENSMUSG00000009995	Taz	chrX	+	74288928	74289019	74288983	74289019	74288661	74288714	3149	232389	2001	129118	100	100	50	1	1	0.852,1.0,1.0,0.818	1.0,0.818,1.0,1.0	-0.037	chrX:74288714-74288929(+)	chrX:74288714-74288984(+)
ENSMUSG00000090077	Lime1	chr2	+	181382193	181382544	181382486	181382544	181381357	181381394	3152	23322115	2300	20252423	1000	100	50	0.405702	1	0.852,0.842,1.0,1.0	0.909,1.0,1.0,1.0	-0.054	chr2:181381394-181382194(+)	chr2:181381394-181382487(+)
ENSMUSG00000067768	Xlr4b	chrX	+	73215227	73215355	73215240	73215355	73214773	73214856	3153	200	100	1100	10	63	50	1	1	NA,0.613,NA,NA	1.0,1.0,0.0,NA	-0.054	chrX:73214856-73215228(+)	chrX:73214856-73215241(+)
ENSMUSG00000028527	Ak4	chr4	+	101462948	101463067	101462987	101463067	101460499	101460672	3154	17191315	10	15131111	0	89	50	1	1	1.0,1.0,0.88,1.0	1.0,1.0,1.0,1.0	-0.03	chr4:101460672-101462949(+)	chr4:101460672-101462988(+)
ENSMUSG00000030533	Unc45a	chr7	-	80329021	80329162	80329021	80329131	80329505	80329647	3163	90717465	1000	61596751	111	81	50	1	1	0.982,1.0,1.0,1.0	1.0,0.973,0.976,0.969	0.016	chr7:80329162-80329506(-)	chr7:80329131-80329506(-)
ENSMUSG00000020430	Pes1	chr11	+	3973436	3973538	3973448	3973538	3973196	3973368	3170	1223	455517520421	3035	382378371432	62	50	1	1	0.002,0.003,0.003,0.006	0.006,0.0,0.006,0.009	-0.002	chr11:3973368-3973437(+)	chr11:3973368-3973449(+)
ENSMUSG00000050312	Nsun3	chr16	-	62776287	62776631	62776287	62776383	62785787	62785897	3175	23231721	71676	22301533	1112710	100	50	0.967428	1	0.622,0.418,0.548,0.636	0.5,0.556,0.517,0.623	0.007	chr16:62776631-62785788(-)	chr16:62776383-62785788(-)
ENSMUSG00000037572	Wdhd1	chr14	-	47266980	47267173	47266980	47267062	47268071	47268213	3177	144128132162	3844	120152130109	3164	100	50	0.470699	1	0.96,0.889,0.943,0.953	0.952,0.987,0.915,0.932	-0.01	chr14:47267173-47268072(-)	chr14:47267062-47268072(-)
ENSMUSG00000064289	Tank	chr2	+	61626902	61627014	61626905	61627014	61613650	61613798	3181	37462929	1129410190	32252832	971028278	53	50	0.61024	1	0.238,0.316,0.213,0.233	0.237,0.188,0.244,0.279	0.013	chr2:61613798-61626903(+)	chr2:61613798-61626906(+)
ENSMUSG00000022401	Xpnpep3	chr15	+	81415846	81415994	81415902	81415994	81414431	81414548	3183	514911	2000	6446	0	100	50	1	1	0.556,1.0,1.0,1.0	1.0,1.0,1.0,1.0	-0.111	chr15:81414548-81415847(+)	chr15:81414548-81415903(+)
ENSMUSG00000019802	Sec63	chr10	+	42812664	42812838	42812667	42812838	42812435	42812495	3187	91919285	6957	85837866	4733	53	50	0.236803	1	0.935,0.905,0.946,0.92	0.952,0.918,0.961,0.954	-0.02	chr10:42812495-42812665(+)	chr10:42812495-42812668(+)
ENSMUSG00000037447	Arid5a	chr1	+	36316208	36316327	36316211	36316327	36307753	36307836	3193	20252217	8526	26191122	4404	53	50	0.158481	0.817854	0.702,0.825,0.912,0.728	0.86,0.818,1.0,0.838	-0.087	chr1:36307836-36316209(+)	chr1:36307836-36316212(+)
ENSMUSG00000037447	Arid5a	chr1	+	36317203	36317662	36317609	36317662	36316211	36316327	3194	27292024	9531	25201415	2484	100	50	0.448796	1	0.6,0.744,0.769,0.923	0.862,0.714,0.467,0.652	0.085	chr1:36316327-36317204(+)	chr1:36316327-36317610(+)
ENSMUSG00000051169	Rpusd3	chr6	-	113416306	113416446	113416306	113416432	113416788	113416912	3198	17173320	1035	17171728	542	64	50	0.477969	1	0.93,1.0,0.896,0.758	1.0,0.726,0.769,0.916	0.043	chr6:113416446-113416789(-)	chr6:113416432-113416789(-)
ENSMUSG00000020747	Tmem94	chr11	+	115790966	115791176	115791032	115791176	115790169	115790334	3200	70587371	34263735	67716067	29162022	100	50	0.0347551	0.344329	0.507,0.527,0.497,0.504	0.536,0.689,0.6,0.604	-0.099	chr11:115790334-115790967(+)	chr11:115790334-115791033(+)
ENSMUSG00000025437	Usp33	chr3	+	152358635	152358698	152358640	152358698	152358145	152358199	3202	90608046	0	36665849	10	55	50	1	1	1.0,1.0,1.0,1.0	1.0,1.0,0.981,1.0	0.005	chr3:152358199-152358636(+)	chr3:152358199-152358641(+)
ENSMUSG00000025437	Usp33	chr3	+	152374890	152374985	152374914	152374985	152374619	152374789	3204	53517560	1313818	31183824	18191814	74	50	4.42243e-05	0.0027749	0.734,0.726,0.864,0.693	0.538,0.39,0.588,0.537	0.241	chr3:152374789-152374891(+)	chr3:152374789-152374915(+)
ENSMUSG00000059327	Eda	chrX	+	100395018	100395143	100395027	100395143	100392332	100392384	3205	4571	1	200	0	59	50	1	1	1.0,1.0,1.0,0.459	NA,1.0,NA,NA	-0.135	chrX:100392384-100395019(+)	chrX:100392384-100395028(+)
ENSMUSG00000034160	Ogt	chrX	+	101642975	101643156	101643005	101643156	101640217	101640322	3207	40255840	14181126	27484023	1114913	80	50	0.488218	1	0.641,0.465,0.767,0.49	0.605,0.682,0.735,0.525	-0.046	chrX:101640322-101642976(+)	chrX:101640322-101643006(+)
ENSMUSG00000038543	BC028528	chr3	-	95884969	95885071	95884969	95885068	95888140	95888296	3209	19661060	30302212	25341017	32342145	53	50	0.0602353	0.473186	0.374,0.675,0.3,0.825	0.424,0.485,0.31,0.263	0.173	chr3:95885071-95888141(-)	chr3:95885068-95888141(-)
ENSMUSG00000004815	Dgkq	chr5	-	108656045	108656131	108656045	108656085	108656423	108656523	3210	31312616	3253	24151926	1345	96	50	0.679873	1	0.843,0.89,0.73,0.735	0.926,0.723,0.712,0.73	0.027	chr5:108656131-108656424(-)	chr5:108656085-108656424(-)
ENSMUSG00000090733	Rps27	chr3	-	90212670	90212753	90212670	90212740	90212933	90213044	3211	4626580662414793	1241	4288496342584733	1003	63	50	1	1	1.0,1.0,0.999,1.0	1.0,1.0,1.0,0.999	0	chr3:90212753-90212934(-)	chr3:90212740-90212934(-)
ENSMUSG00000032480	Dhx30	chr9	-	110112970	110113090	110112970	110113025	110115035	110115161	3216	70396268	34263125	57736060	21142120	100	50	0.023062	0.261966	0.507,0.429,0.5,0.576	0.576,0.723,0.588,0.6	-0.119	chr9:110113090-110115036(-)	chr9:110113025-110115036(-)
ENSMUSG00000032480	Dhx30	chr9	-	110115035	110115211	110115035	110115161	110115490	110115582	3218	4757	24344043	3451	26282730	100	50	0.230275	0.993753	0.077,0.093,0.059,0.075	0.055,0.067,0.085,0.016	0.02	chr9:110115211-110115491(-)	chr9:110115161-110115491(-)
ENSMUSG00000062070	Pgk1	chrX	+	106200116	106200336	106200156	106200336	106199646	106199761	3219	21	822805811802	10	876663704654	90	50	1	1	0.0,0.0,0.001,0.001	0.0,0.0,0.001,0.0	0	chrX:106199761-106200117(+)	chrX:106199761-106200157(+)
ENSMUSG00000021932	Rnaseh2b	chr14	+	62348520	62348628	62348561	62348628	62346567	62346642	3224	261294273272	5452	251258241230	2241	91	50	0.158059	0.817159	0.966,0.976,0.968,0.987	0.986,0.986,0.971,0.992	-0.009	chr14:62346642-62348521(+)	chr14:62346642-62348562(+)
ENSMUSG00000040549	Ckap5	chr2	+	91619687	91619839	91619750	91619839	91616300	91616460	3227	140150184133	1224	115106125134	3121	100	50	0.791732	1	0.986,0.974,0.979,0.943	0.95,0.981,0.969,0.985	-0.001	chr2:91616460-91619688(+)	chr2:91616460-91619751(+)
ENSMUSG00000026820	Ptges2	chr2	+	32400389	32400552	32400402	32400552	32400049	32400108	3228	2043	43305142	1203	40704063	63	50	0.169892	0.850106	0.036,0.0,0.059,0.054	0.019,0.022,0.0,0.036	0.018	chr2:32400108-32400390(+)	chr2:32400108-32400403(+)
ENSMUSG00000022749	Tbc1d23	chr16	-	57212370	57212575	57212370	57212490	57214163	57214269	3229	27363031	1721	38283835	1101	100	50	1	1	0.931,0.72,0.882,0.939	0.95,0.933,1.0,0.946	-0.089	chr16:57212575-57214164(-)	chr16:57212490-57214164(-)
ENSMUSG00000040312	Cchcr1	chr17	+	35530401	35530558	35530443	35530558	35530147	35530299	3231	4221	31162316	161	21201416	92	50	0.5464	1	0.066,0.064,0.045,0.033	0.0,0.026,0.189,0.033	-0.01	chr17:35530299-35530402(+)	chr17:35530299-35530444(+)
ENSMUSG00000026815	Gfi1b	chr2	-	28611418	28611683	28611418	28611584	28612780	28612918	3232	264710955	33598971	24687268	30588181	100	50	0.934119	1	0.283,0.285,0.38,0.279	0.286,0.37,0.308,0.296	-0.008	chr2:28611683-28612781(-)	chr2:28611584-28612781(-)
ENSMUSG00000044162	Tnip3	chr6	+	65590571	65590652	65590604	65590652	65577076	65577170	3234	1143	10	2030	0	83	50	1	1	1.0,1.0,0.707,1.0	1.0,NA,1.0,NA	-0.073	chr6:65577170-65590572(+)	chr6:65577170-65590605(+)
ENSMUSG00000027630	Tbl1xr1	chr3	+	22209511	22209613	22209515	22209613	22203826	22203992	3235	56505767	100	55593533	0	54	50	1	1	1.0,0.979,1.0,1.0	1.0,1.0,1.0,1.0	-0.005	chr3:22203992-22209512(+)	chr3:22203992-22209516(+)
ENSMUSG00000042744	Hectd4	chr5	+	121301741	121301888	121301768	121301888	121299444	121299643	3238	8341	1317217	4442	611823	77	50	0.893776	1	0.286,0.103,0.11,0.085	0.302,0.191,0.245,0.053	-0.052	chr5:121299643-121301742(+)	chr5:121299643-121301769(+)
ENSMUSG00000037761	Actr5	chr2	+	158636007	158636147	158636026	158636147	158635306	158635426	3242	85766986	8383	58627663	3762	69	50	0.968389	1	0.885,0.948,0.862,0.954	0.933,0.865,0.902,0.958	-0.002	chr2:158635426-158636008(+)	chr2:158635426-158636027(+)
ENSMUSG00000031825	Crispld2	chr8	+	120023564	120023702	120023567	120023702	120018852	120018953	3245	1300	412	2201	1302	53	50	1	1	1.0,0.414,0.0,0.0	0.654,0.386,NA,0.321	-0.1	chr8:120018953-120023565(+)	chr8:120018953-120023568(+)
ENSMUSG00000009941	Nxf2	chrX	-	134949686	134949884	134949686	134949866	134950346	134950419	3246	1012	1301	3214	1610	68	50	0.0803945	0.556064	0.424,0.0,1.0,0.595	0.688,0.197,0.424,1.0	-0.073	chrX:134949884-134950347(-)	chrX:134949866-134950347(-)
ENSMUSG00000007880	Arid1a	chr4	-	133687203	133687379	133687203	133687376	133687537	133687670	3249	23181911	11298115105	9101117	94909872	53	50	0.275368	1	0.162,0.148,0.135,0.09	0.083,0.095,0.096,0.182	0.02	chr4:133687379-133687538(-)	chr4:133687376-133687538(-)
[truncated: 1,447 more rows]

## Sheet: A5SS
GeneID	geneSymbol	chr	strand	longExonStart_0base	longExonEnd	shortES	shortEE	flankingES	flankingEE	ID.1	IJC_SAMPLE_1	SJC_SAMPLE_1	IJC_SAMPLE_2	SJC_SAMPLE_2	IncFormLen	SkipFormLen	PValue	FDR	IncLevel1	IncLevel2	IncLevelDifference	chr.start.stop.long	chr.start.stop.short
[truncated: 1,693 more rows]

[truncated: 3 more sheets: MXE, RI, SE]
