# Supplementary material for: U2af1S34F and U2af1Q157R myeloid neoplasm-associated hotspot mutations induce distinct hematopoietic phenotypes in mice
Source: Leukemia. 2026 May 6;40(7):1467–81. doi: 10.1038/s41375-026-02974-7 (PMC13276503; doi:10.1038/s41375-026-02974-7)
Supplement: Supplementary file 8 — Table S8 Mouse KL DSE [file 41375_2026_2974_MOESM8_ESM.xlsx]

## Sheet: KL_Fei_S34F_DSE
Event_ID	delta_PSI	Event_ID_withdir
ENSMUSG00000102976|Zc3h11a|chr1|-|SE|133655344|133655398|133653972|133654032|133661236|133661318	-0.451	ENSMUSG00000102976|Zc3h11a|chr1|-|SE|133655344|133655398|133653972|133654032|133661236|133661318|NEG
ENSMUSG00000022641|Bbx|chr16|-|SE|50210444|50210534|50209084|50209144|50220444|50220593	-0.443	ENSMUSG00000022641|Bbx|chr16|-|SE|50210444|50210534|50209084|50209144|50220444|50220593|NEG
ENSMUSG00000012076|Brms1l|chr12|+|RI|55868161|55869736|55868161|55868520|55869397|55869736	-0.408	ENSMUSG00000012076|Brms1l|chr12|+|RI|55868161|55869736|55868161|55868520|55869397|55869736|NEG
ENSMUSG00000022119|Rbm26|chr14|-|SE|105139090|105139162|105131881|105132007|105140315|105140438	-0.397	ENSMUSG00000022119|Rbm26|chr14|-|SE|105139090|105139162|105131881|105132007|105140315|105140438|NEG
ENSMUSG00000031516|Dctn6|chr8|-|MXE|34098918|34099101|34104985|34105098|34097188|34097294|34106341|34106406	-0.349	ENSMUSG00000031516|Dctn6|chr8|-|MXE|34098918|34099101|34104985|34105098|34097188|34097294|34106341|34106406|NEG
ENSMUSG00000030177|Ccdc77|chr6|-|A3SS|120350206|120350444|120350206|120350390|120354000|120354054	-0.336	ENSMUSG00000030177|Ccdc77|chr6|-|A3SS|120350206|120350444|120350206|120350390|120354000|120354054|NEG
ENSMUSG00000035824|Tk2|chr8|-|SE|104247646|104247684|104243384|104243459|104248400|104248533	-0.322	ENSMUSG00000035824|Tk2|chr8|-|SE|104247646|104247684|104243384|104243459|104248400|104248533|NEG
ENSMUSG00000031516|Dctn6|chr8|-|MXE|34098918|34099101|34104985|34105039|34097188|34097294|34106341|34106406	-0.318	ENSMUSG00000031516|Dctn6|chr8|-|MXE|34098918|34099101|34104985|34105039|34097188|34097294|34106341|34106406|NEG
ENSMUSG00000064215|Ifi27|chr12|+|SE|103437389|103437524|103436562|103436682|103439400|103439562	-0.315	ENSMUSG00000064215|Ifi27|chr12|+|SE|103437389|103437524|103436562|103436682|103439400|103439562|NEG
ENSMUSG00000026656|Fcgr2b|chr1|-|SE|170963408|170963465|170961195|170961233|170965701|170965824	-0.31	ENSMUSG00000026656|Fcgr2b|chr1|-|SE|170963408|170963465|170961195|170961233|170965701|170965824|NEG
ENSMUSG00000010608|Rbm25|chr12|+|SE|83642401|83642519|83639127|83639191|83642628|83642698	-0.308	ENSMUSG00000010608|Rbm25|chr12|+|SE|83642401|83642519|83639127|83639191|83642628|83642698|NEG
ENSMUSG00000035967|Ints6l|chrX|+|SE|56494132|56494243|56493038|56493133|56496515|56496734	-0.308	ENSMUSG00000035967|Ints6l|chrX|+|SE|56494132|56494243|56493038|56493133|56496515|56496734|NEG
ENSMUSG00000037108|Zcwpw1|chr5|+|SE|137816892|137816976|137812001|137812100|137817457|137817524	-0.306	ENSMUSG00000037108|Zcwpw1|chr5|+|SE|137816892|137816976|137812001|137812100|137817457|137817524|NEG
ENSMUSG00000026656|Fcgr2b|chr1|-|SE|170963324|170963465|170961195|170961233|170965701|170965824	-0.298	ENSMUSG00000026656|Fcgr2b|chr1|-|SE|170963324|170963465|170961195|170961233|170965701|170965824|NEG
ENSMUSG00000030556|Lrrc28|chr7|-|A3SS|67559857|67560064|67559857|67559969|67617992|67618130	-0.293	ENSMUSG00000030556|Lrrc28|chr7|-|A3SS|67559857|67560064|67559857|67559969|67617992|67618130|NEG
ENSMUSG00000041975|Mettl8|chr2|-|A3SS|70981854|70982195|70981854|70981967|70993483|70993575	-0.291	ENSMUSG00000041975|Mettl8|chr2|-|A3SS|70981854|70982195|70981854|70981967|70993483|70993575|NEG
ENSMUSG00000029283|Cdc7|chr5|+|A3SS|106974600|106975660|106975484|106975660|106973776|106974020	-0.289	ENSMUSG00000029283|Cdc7|chr5|+|A3SS|106974600|106975660|106975484|106975660|106973776|106974020|NEG
ENSMUSG00000059474|Mbtd1|chr11|+|SE|93891338|93891388|93887021|93887073|93905158|93905343	-0.276	ENSMUSG00000059474|Mbtd1|chr11|+|SE|93891338|93891388|93887021|93887073|93905158|93905343|NEG
ENSMUSG00000055541|Lair1|chr7|-|SE|4028706|4029036|4010589|4010632|4055917|4055953	-0.276	ENSMUSG00000055541|Lair1|chr7|-|SE|4028706|4029036|4010589|4010632|4055917|4055953|NEG
ENSMUSG00000036916|Zfp280c|chrX|-|SE|48543584|48543703|48543404|48543441|48547264|48547327	-0.276	ENSMUSG00000036916|Zfp280c|chrX|-|SE|48543584|48543703|48543404|48543441|48547264|48547327|NEG
ENSMUSG00000000838|Fmr1|chrX|+|SE|68705860|68705923|68705248|68705380|68708041|68708128	-0.274	ENSMUSG00000000838|Fmr1|chrX|+|SE|68705860|68705923|68705248|68705380|68708041|68708128|NEG
ENSMUSG00000034764|1700006J14Rik|chr10|+|SE|120371256|120371304|120369874|120370024|120382064|120384336	-0.268	ENSMUSG00000034764|1700006J14Rik|chr10|+|SE|120371256|120371304|120369874|120370024|120382064|120384336|NEG
ENSMUSG00000029283|Cdc7|chr5|+|SE|106974600|106974696|106973776|106974020|106975484|106975660	-0.268	ENSMUSG00000029283|Cdc7|chr5|+|SE|106974600|106974696|106973776|106974020|106975484|106975660|NEG
ENSMUSG00000028708|Mknk1|chr4|+|SE|115876580|115876624|115875380|115875545|115877949|115879250	-0.266	ENSMUSG00000028708|Mknk1|chr4|+|SE|115876580|115876624|115875380|115875545|115877949|115879250|NEG
ENSMUSG00000050619|Zscan29|chr2|-|SE|121169198|121169403|121166043|121166718|121169809|121170268	-0.264	ENSMUSG00000050619|Zscan29|chr2|-|SE|121169198|121169403|121166043|121166718|121169809|121170268|NEG
ENSMUSG00000092572|Serpinb10|chr1|+|SE|107532362|107532538|107529026|107529091|107535444|107535510	-0.261	ENSMUSG00000092572|Serpinb10|chr1|+|SE|107532362|107532538|107529026|107529091|107535444|107535510|NEG
ENSMUSG00000050017|Pitpnb|chr5|+|SE|111385519|111385604|111382987|111383110|111386502|111388359	-0.261	ENSMUSG00000050017|Pitpnb|chr5|+|SE|111385519|111385604|111382987|111383110|111386502|111388359|NEG
ENSMUSG00000028759|Hp1bp3|chr4|+|SE|138221525|138221718|138217267|138217294|138222088|138222188	-0.261	ENSMUSG00000028759|Hp1bp3|chr4|+|SE|138221525|138221718|138217267|138217294|138222088|138222188|NEG
ENSMUSG00000027111|Itga6|chr2|+|SE|71853533|71853663|71849380|71849506|71855853|71856758	-0.259	ENSMUSG00000027111|Itga6|chr2|+|SE|71853533|71853663|71849380|71849506|71855853|71856758|NEG
ENSMUSG00000029217|Tec|chr5|-|SE|72779420|72779486|72773208|72773885|72782002|72782175	-0.259	ENSMUSG00000029217|Tec|chr5|-|SE|72779420|72779486|72773208|72773885|72782002|72782175|NEG
ENSMUSG00000027751|Supt20|chr3|+|A3SS|54722520|54722640|54722556|54722640|54720405|54720461	-0.258	ENSMUSG00000027751|Supt20|chr3|+|A3SS|54722520|54722640|54722556|54722640|54720405|54720461|NEG
ENSMUSG00000021557|Agtpbp1|chr13|-|SE|59531056|59531203|59528386|59528518|59532012|59532076	-0.257	ENSMUSG00000021557|Agtpbp1|chr13|-|SE|59531056|59531203|59528386|59528518|59532012|59532076|NEG
ENSMUSG00000026004|Kansl1l|chr1|-|A3SS|66773421|66773619|66773421|66773514|66777966|66778108	-0.257	ENSMUSG00000026004|Kansl1l|chr1|-|A3SS|66773421|66773619|66773421|66773514|66777966|66778108|NEG
ENSMUSG00000007570|Fance|chr17|+|A3SS|28318032|28318156|28318061|28318156|28317467|28317611	-0.256	ENSMUSG00000007570|Fance|chr17|+|A3SS|28318032|28318156|28318061|28318156|28317467|28317611|NEG
ENSMUSG00000011257|Pabpc4|chr4|+|SE|123295749|123295836|123295201|123295321|123295929|123296057	-0.254	ENSMUSG00000011257|Pabpc4|chr4|+|SE|123295749|123295836|123295201|123295321|123295929|123296057|NEG
ENSMUSG00000038538|Ubn2|chr6|+|SE|38489253|38489304|38487107|38487150|38490383|38491931	-0.253	ENSMUSG00000038538|Ubn2|chr6|+|SE|38489253|38489304|38487107|38487150|38490383|38491931|NEG
ENSMUSG00000040785|Ttc3|chr16|+|SE|94384345|94384388|94382907|94384066|94384783|94384934	-0.252	ENSMUSG00000040785|Ttc3|chr16|+|SE|94384345|94384388|94382907|94384066|94384783|94384934|NEG
ENSMUSG00000028152|Tspan5|chr3|+|A3SS|138896788|138896914|138896852|138896914|138894347|138894518	-0.252	ENSMUSG00000028152|Tspan5|chr3|+|A3SS|138896788|138896914|138896852|138896914|138894347|138894518|NEG
ENSMUSG00000055681|Cope|chr8|+|RI|70304633|70306651|70304633|70304696|70306498|70306651	-0.251	ENSMUSG00000055681|Cope|chr8|+|RI|70304633|70306651|70304633|70304696|70306498|70306651|NEG
ENSMUSG00000058291|Zfp68|chr5|-|SE|138616469|138616559|138612038|138612165|138617054|138617167	-0.248	ENSMUSG00000058291|Zfp68|chr5|-|SE|138616469|138616559|138612038|138612165|138617054|138617167|NEG
ENSMUSG00000063052|Lrrc40|chr3|+|SE|158043560|158043690|158036699|158036876|158048400|158048524	-0.245	ENSMUSG00000063052|Lrrc40|chr3|+|SE|158043560|158043690|158036699|158036876|158048400|158048524|NEG
ENSMUSG00000042185|Nfrkb|chr9|+|A3SS|31396999|31397137|31397035|31397137|31396322|31396497	-0.244	ENSMUSG00000042185|Nfrkb|chr9|+|A3SS|31396999|31397137|31397035|31397137|31396322|31396497|NEG
ENSMUSG00000024317|Rnf138|chr18|+|SE|21024408|21024516|21020887|21020999|21026085|21027535	-0.243	ENSMUSG00000024317|Rnf138|chr18|+|SE|21024408|21024516|21020887|21020999|21026085|21027535|NEG
ENSMUSG00000056770|Setd3|chr12|-|SE|108160232|108160381|108158275|108158348|108162972|108163065	-0.243	ENSMUSG00000056770|Setd3|chr12|-|SE|108160232|108160381|108158275|108158348|108162972|108163065|NEG
ENSMUSG00000058291|Zfp68|chr5|-|SE|138616469|138616614|138612066|138612165|138617054|138617167	-0.241	ENSMUSG00000058291|Zfp68|chr5|-|SE|138616469|138616614|138612066|138612165|138617054|138617167|NEG
ENSMUSG00000026049|Tex30|chr1|-|SE|44101899|44101957|44099847|44099935|44102327|44102391	-0.241	ENSMUSG00000026049|Tex30|chr1|-|SE|44101899|44101957|44099847|44099935|44102327|44102391|NEG
ENSMUSG00000013973|Dedd|chr1|+|SE|171331252|171331285|171329144|171329526|171338251|171338339	-0.238	ENSMUSG00000013973|Dedd|chr1|+|SE|171331252|171331285|171329144|171329526|171338251|171338339|NEG
ENSMUSG00000099481|Xndc1|chr7|+|A3SS|102071186|102071361|102071218|102071361|102069896|102069991	-0.238	ENSMUSG00000099481|Xndc1|chr7|+|A3SS|102071186|102071361|102071218|102071361|102069896|102069991|NEG
ENSMUSG00000037544|Dlgap5|chr14|-|A3SS|47405774|47405901|47405774|47405865|47406338|47406418	-0.237	ENSMUSG00000037544|Dlgap5|chr14|-|A3SS|47405774|47405901|47405774|47405865|47406338|47406418|NEG
ENSMUSG00000020212|Mdm1|chr10|+|SE|118156833|118156863|118152174|118152274|118157194|118157370	-0.236	ENSMUSG00000020212|Mdm1|chr10|+|SE|118156833|118156863|118152174|118152274|118157194|118157370|NEG
ENSMUSG00000042185|Nfrkb|chr9|+|A3SS|31396793|31397137|31397035|31397137|31396322|31396497	-0.235	ENSMUSG00000042185|Nfrkb|chr9|+|A3SS|31396793|31397137|31397035|31397137|31396322|31396497|NEG
ENSMUSG00000045679|Pqlc3|chr12|-|A3SS|16992277|16993573|16992277|16992319|16995613|16995671	-0.235	ENSMUSG00000045679|Pqlc3|chr12|-|A3SS|16992277|16993573|16992277|16992319|16995613|16995671|NEG
ENSMUSG00000032540|Abhd5|chr9|+|SE|122365135|122365237|122351788|122351839|122367888|122368122	-0.234	ENSMUSG00000032540|Abhd5|chr9|+|SE|122365135|122365237|122351788|122351839|122367888|122368122|NEG
ENSMUSG00000058291|Zfp68|chr5|-|SE|138616469|138616565|138612038|138612165|138617054|138617167	-0.231	ENSMUSG00000058291|Zfp68|chr5|-|SE|138616469|138616565|138612038|138612165|138617054|138617167|NEG
ENSMUSG00000054387|Mdm4|chr1|-|SE|133004653|133004692|133003790|133003890|133009136|133009192	-0.23	ENSMUSG00000054387|Mdm4|chr1|-|SE|133004653|133004692|133003790|133003890|133009136|133009192|NEG
ENSMUSG00000036022|Fam122b|chrX|-|A3SS|53258956|53259021|53258956|53259018|53259840|53259926	-0.229	ENSMUSG00000036022|Fam122b|chrX|-|A3SS|53258956|53259021|53258956|53259018|53259840|53259926|NEG
ENSMUSG00000037369|Kdm6a|chrX|+|SE|18246974|18247109|18246196|18246416|18248269|18248359	-0.226	ENSMUSG00000037369|Kdm6a|chrX|+|SE|18246974|18247109|18246196|18246416|18248269|18248359|NEG
ENSMUSG00000023286|Ube2j2|chr4|+|SE|155946254|155946417|155943868|155944013|155949006|155949137	-0.225	ENSMUSG00000023286|Ube2j2|chr4|+|SE|155946254|155946417|155943868|155944013|155949006|155949137|NEG
ENSMUSG00000061950|Ppp4r1|chr17|+|A3SS|65803159|65803295|65803210|65803295|65783623|65783668	-0.224	ENSMUSG00000061950|Ppp4r1|chr17|+|A3SS|65803159|65803295|65803210|65803295|65783623|65783668|NEG
ENSMUSG00000002010|Idh3g|chrX|-|SE|73782297|73782309|73782005|73782103|73782674|73782716	-0.222	ENSMUSG00000002010|Idh3g|chrX|-|SE|73782297|73782309|73782005|73782103|73782674|73782716|NEG
ENSMUSG00000054387|Mdm4|chr1|-|SE|133004653|133004721|133003790|133003890|133009136|133009192	-0.22	ENSMUSG00000054387|Mdm4|chr1|-|SE|133004653|133004721|133003790|133003890|133009136|133009192|NEG
ENSMUSG00000019907|Ppp1r12a|chr10|+|SE|108252756|108252924|108251839|108251944|108253324|108253495	-0.22	ENSMUSG00000019907|Ppp1r12a|chr10|+|SE|108252756|108252924|108251839|108251944|108253324|108253495|NEG
ENSMUSG00000029647|Pan3|chr5|+|SE|147488110|147488258|147455117|147455188|147519504|147519752	-0.219	ENSMUSG00000029647|Pan3|chr5|+|SE|147488110|147488258|147455117|147455188|147519504|147519752|NEG
ENSMUSG00000020541|Tom1l1|chr11|-|SE|90672832|90672937|90671083|90671200|90673663|90673786	-0.218	ENSMUSG00000020541|Tom1l1|chr11|-|SE|90672832|90672937|90671083|90671200|90673663|90673786|NEG
ENSMUSG00000040363|Bcor|chrX|-|A3SS|12048302|12048647|12048302|12048545|12048994|12049252	-0.216	ENSMUSG00000040363|Bcor|chrX|-|A3SS|12048302|12048647|12048302|12048545|12048994|12049252|NEG
ENSMUSG00000027201|Myef2|chr2|-|SE|125097562|125097634|125095911|125096120|125097976|125098075	-0.213	ENSMUSG00000027201|Myef2|chr2|-|SE|125097562|125097634|125095911|125096120|125097976|125098075|NEG
ENSMUSG00000028863|Meaf6|chr4|+|SE|125107651|125107709|125102838|125103031|125108322|125108356	-0.21	ENSMUSG00000028863|Meaf6|chr4|+|SE|125107651|125107709|125102838|125103031|125108322|125108356|NEG
ENSMUSG00000069495|Epc2|chr2|+|SE|49532043|49532235|49530010|49530143|49535254|49535344	-0.206	ENSMUSG00000069495|Epc2|chr2|+|SE|49532043|49532235|49530010|49530143|49535254|49535344|NEG
ENSMUSG00000000568|Hnrnpd|chr5|-|SE|99976533|99976590|99967218|99967387|99978391|99978449	-0.206	ENSMUSG00000000568|Hnrnpd|chr5|-|SE|99976533|99976590|99967218|99967387|99978391|99978449|NEG
ENSMUSG00000032812|Arap1|chr7|+|SE|101404932|101404965|101404279|101404425|101408046|101408129	-0.205	ENSMUSG00000032812|Arap1|chr7|+|SE|101404932|101404965|101404279|101404425|101408046|101408129|NEG
ENSMUSG00000023206|Il15ra|chr2|+|SE|11720012|11720105|11718263|11718458|11723412|11723610	-0.203	ENSMUSG00000023206|Il15ra|chr2|+|SE|11720012|11720105|11718263|11718458|11723412|11723610|NEG
ENSMUSG00000035778|Ggta1|chr2|-|SE|35414218|35414284|35413325|35413427|35422179|35422268	-0.203	ENSMUSG00000035778|Ggta1|chr2|-|SE|35414218|35414284|35413325|35413427|35422179|35422268|NEG
ENSMUSG00000027667|Zfp639|chr3|+|A3SS|32515283|32517139|32517028|32517139|32514383|32514454	-0.203	ENSMUSG00000027667|Zfp639|chr3|+|A3SS|32515283|32517139|32517028|32517139|32514383|32514454|NEG
ENSMUSG00000053460|Ggcx|chr6|+|SE|72419016|72419266|72418235|72418466|72422415|72422494	-0.202	ENSMUSG00000053460|Ggcx|chr6|+|SE|72419016|72419266|72418235|72418466|72422415|72422494|NEG
ENSMUSG00000045679|Pqlc3|chr12|-|SE|16993452|16993573|16992277|16992319|16995613|16995671	-0.202	ENSMUSG00000045679|Pqlc3|chr12|-|SE|16993452|16993573|16992277|16992319|16995613|16995671|NEG
ENSMUSG00000031389|Arhgap4|chrX|-|SE|73906156|73906219|73905650|73905863|73906428|73906591	-0.201	ENSMUSG00000031389|Arhgap4|chrX|-|SE|73906156|73906219|73905650|73905863|73906428|73906591|NEG
ENSMUSG00000013973|Dedd|chr1|+|SE|171331233|171331285|171329398|171329526|171338251|171338640	-0.2	ENSMUSG00000013973|Dedd|chr1|+|SE|171331233|171331285|171329398|171329526|171338251|171338640|NEG
ENSMUSG00000032254|Kif23|chr9|-|SE|61933228|61933270|61932074|61932187|61935379|61935550	-0.198	ENSMUSG00000032254|Kif23|chr9|-|SE|61933228|61933270|61932074|61932187|61935379|61935550|NEG
ENSMUSG00000036202|Rif1|chr2|+|SE|52116667|52116745|52116247|52116394|52116834|52116950	-0.196	ENSMUSG00000036202|Rif1|chr2|+|SE|52116667|52116745|52116247|52116394|52116834|52116950|NEG
ENSMUSG00000000600|Krit1|chr5|+|A3SS|3806418|3806568|3806464|3806568|3803183|3803483	-0.195	ENSMUSG00000000600|Krit1|chr5|+|A3SS|3806418|3806568|3806464|3806568|3803183|3803483|NEG
ENSMUSG00000064215|Ifi27|chr12|+|SE|103437389|103437524|103436562|103436682|103437675|103437705	-0.194	ENSMUSG00000064215|Ifi27|chr12|+|SE|103437389|103437524|103436562|103436682|103437675|103437705|NEG
ENSMUSG00000040481|Bptf|chr11|-|SE|107044491|107044665|107043632|107043825|107046999|107047343	-0.191	ENSMUSG00000040481|Bptf|chr11|-|SE|107044491|107044665|107043632|107043825|107046999|107047343|NEG
ENSMUSG00000031543|Ank1|chr8|+|RI|23132096|23132634|23132096|23132483|23132561|23132634	-0.19	ENSMUSG00000031543|Ank1|chr8|+|RI|23132096|23132634|23132096|23132483|23132561|23132634|NEG
ENSMUSG00000028797|Tmem234|chr4|+|A5SS|129600982|129601243|129600982|129601134|129607086|129607179	-0.19	ENSMUSG00000028797|Tmem234|chr4|+|A5SS|129600982|129601243|129600982|129601134|129607086|129607179|NEG
ENSMUSG00000038708|Golga4|chr9|+|SE|118537241|118537325|118536758|118536943|118538876|118539024	-0.189	ENSMUSG00000038708|Golga4|chr9|+|SE|118537241|118537325|118536758|118536943|118538876|118539024|NEG
ENSMUSG00000021548|Ccnh|chr13|+|A3SS|85202332|85202496|85202440|85202496|85197350|85197561	-0.187	ENSMUSG00000021548|Ccnh|chr13|+|A3SS|85202332|85202496|85202440|85202496|85197350|85197561|NEG
ENSMUSG00000025157|Zdhhc16|chr19|+|SE|41939856|41939904|41939599|41939733|41940649|41940713	-0.187	ENSMUSG00000025157|Zdhhc16|chr19|+|SE|41939856|41939904|41939599|41939733|41940649|41940713|NEG
ENSMUSG00000040723|Rcsd1|chr1|-|SE|165663565|165663655|165659372|165659444|165664948|165665050	-0.185	ENSMUSG00000040723|Rcsd1|chr1|-|SE|165663565|165663655|165659372|165659444|165664948|165665050|NEG
ENSMUSG00000062797|Hikeshi|chr7|-|SE|89935726|89935964|89923563|89923715|89940968|89941066	-0.182	ENSMUSG00000062797|Hikeshi|chr7|-|SE|89935726|89935964|89923563|89923715|89940968|89941066|NEG
ENSMUSG00000028759|Hp1bp3|chr4|+|SE|138221525|138221723|138216295|138216740|138222088|138222188	-0.18	ENSMUSG00000028759|Hp1bp3|chr4|+|SE|138221525|138221723|138216295|138216740|138222088|138222188|NEG
ENSMUSG00000053332|Gas5|chr1|+|SE|161037123|161037164|161036819|161036852|161037287|161037315	-0.178	ENSMUSG00000053332|Gas5|chr1|+|SE|161037123|161037164|161036819|161036852|161037287|161037315|NEG
ENSMUSG00000029208|Guf1|chr5|+|SE|69563082|69563222|69561653|69561857|69564523|69564647	-0.178	ENSMUSG00000029208|Guf1|chr5|+|SE|69563082|69563222|69561653|69561857|69564523|69564647|NEG
ENSMUSG00000037300|Ttc13|chr8|-|SE|124699655|124699721|124690276|124690359|124709902|124709948	-0.177	ENSMUSG00000037300|Ttc13|chr8|-|SE|124699655|124699721|124690276|124690359|124709902|124709948|NEG
ENSMUSG00000025193|Cutc|chr19|+|A3SS|43762872|43763006|43762902|43763006|43760688|43760724	-0.171	ENSMUSG00000025193|Cutc|chr19|+|A3SS|43762872|43763006|43762902|43763006|43760688|43760724|NEG
ENSMUSG00000021905|Dph3|chr14|-|SE|32084906|32085107|32080568|32083246|32085409|32085609	-0.171	ENSMUSG00000021905|Dph3|chr14|-|SE|32084906|32085107|32080568|32083246|32085409|32085609|NEG
ENSMUSG00000055541|Lair1|chr7|-|SE|4028706|4029036|4010729|4010846|4055917|4055953	-0.169	ENSMUSG00000055541|Lair1|chr7|-|SE|4028706|4029036|4010729|4010846|4055917|4055953|NEG
ENSMUSG00000029767|Calu|chr6|+|SE|29361559|29361753|29361293|29361487|29366039|29366206	-0.167	ENSMUSG00000029767|Calu|chr6|+|SE|29361559|29361753|29361293|29361487|29366039|29366206|NEG
ENSMUSG00000037669|Ldah|chr12|+|SE|8227219|8227363|8220599|8220755|8268363|8268598	-0.166	ENSMUSG00000037669|Ldah|chr12|+|SE|8227219|8227363|8220599|8220755|8268363|8268598|NEG
ENSMUSG00000029472|Anapc5|chr5|-|A3SS|122800450|122800632|122800450|122800593|122802129|122802219	-0.165	ENSMUSG00000029472|Anapc5|chr5|-|A3SS|122800450|122800632|122800450|122800593|122802129|122802219|NEG
ENSMUSG00000028797|Tmem234|chr4|+|SE|129602221|129602261|129600982|129601134|129607086|129607179	-0.165	ENSMUSG00000028797|Tmem234|chr4|+|SE|129602221|129602261|129600982|129601134|129607086|129607179|NEG
ENSMUSG00000029782|Tmem209|chr6|-|SE|30508665|30508842|30508453|30508512|30509684|30509718	-0.164	ENSMUSG00000029782|Tmem209|chr6|-|SE|30508665|30508842|30508453|30508512|30509684|30509718|NEG
ENSMUSG00000035597|Prpf39|chr12|+|SE|65055433|65055533|65055155|65055320|65055637|65055764	-0.16	ENSMUSG00000035597|Prpf39|chr12|+|SE|65055433|65055533|65055155|65055320|65055637|65055764|NEG
ENSMUSG00000004980|Hnrnpa2b1|chr6|-|SE|51464427|51464547|51464088|51464211|51465178|51465241	-0.16	ENSMUSG00000004980|Hnrnpa2b1|chr6|-|SE|51464427|51464547|51464088|51464211|51465178|51465241|NEG
ENSMUSG00000014402|Tsg101|chr7|-|A3SS|46908904|46909068|46908904|46908991|46910744|46910810	-0.16	ENSMUSG00000014402|Tsg101|chr7|-|A3SS|46908904|46909068|46908904|46908991|46910744|46910810|NEG
ENSMUSG00000022884|Eif4a2|chr16|+|SE|23109119|23109259|23108718|23108851|23109984|23110153	-0.159	ENSMUSG00000022884|Eif4a2|chr16|+|SE|23109119|23109259|23108718|23108851|23109984|23110153|NEG
ENSMUSG00000093930|Hmgcs1|chr13|+|SE|119694889|119695047|119690378|119690513|119699663|119699726	-0.158	ENSMUSG00000093930|Hmgcs1|chr13|+|SE|119694889|119695047|119690378|119690513|119699663|119699726|NEG
ENSMUSG00000055541|Lair1|chr7|-|SE|4010729|4010846|4010589|4010632|4055917|4055953	-0.158	ENSMUSG00000055541|Lair1|chr7|-|SE|4010729|4010846|4010589|4010632|4055917|4055953|NEG
ENSMUSG00000020189|Osbpl8|chr10|+|SE|111224671|111224708|111204734|111204840|111233552|111233690	-0.158	ENSMUSG00000020189|Osbpl8|chr10|+|SE|111224671|111224708|111204734|111204840|111233552|111233690|NEG
ENSMUSG00000027667|Zfp639|chr3|+|SE|32515283|32515352|32514383|32514454|32517028|32517139	-0.158	ENSMUSG00000027667|Zfp639|chr3|+|SE|32515283|32515352|32514383|32514454|32517028|32517139|NEG
ENSMUSG00000000631|Myo18a|chr11|+|SE|77822662|77822674|77821041|77821186|77823275|77823446	-0.154	ENSMUSG00000000631|Myo18a|chr11|+|SE|77822662|77822674|77821041|77821186|77823275|77823446|NEG
ENSMUSG00000037669|Ldah|chr12|+|SE|8238442|8238615|8220599|8220755|8268363|8268598	-0.153	ENSMUSG00000037669|Ldah|chr12|+|SE|8238442|8238615|8220599|8220755|8268363|8268598|NEG
ENSMUSG00000022359|Wdyhv1|chr15|+|SE|58152596|58152745|58150605|58150656|58153579|58153704	-0.153	ENSMUSG00000022359|Wdyhv1|chr15|+|SE|58152596|58152745|58150605|58150656|58153579|58153704|NEG
ENSMUSG00000028104|Polr3gl|chr3|-|SE|96582087|96582255|96581643|96581773|96594083|96594181	-0.153	ENSMUSG00000028104|Polr3gl|chr3|-|SE|96582087|96582255|96581643|96581773|96594083|96594181|NEG
ENSMUSG00000022680|Pdxdc1|chr16|-|SE|13836385|13836615|13833147|13834846|13837042|13837081	-0.152	ENSMUSG00000022680|Pdxdc1|chr16|-|SE|13836385|13836615|13833147|13834846|13837042|13837081|NEG
ENSMUSG00000063358|Mapk1|chr16|+|SE|17026357|17026489|17026025|17026140|17035441|17035551	-0.151	ENSMUSG00000063358|Mapk1|chr16|+|SE|17026357|17026489|17026025|17026140|17035441|17035551|NEG
ENSMUSG00000027708|Dcun1d1|chr3|-|SE|35916219|35916350|35897792|35897875|35919000|35919169	-0.151	ENSMUSG00000027708|Dcun1d1|chr3|-|SE|35916219|35916350|35897792|35897875|35919000|35919169|NEG
ENSMUSG00000019961|Tmpo|chr10|-|SE|91153277|91153397|91153084|91153180|91158747|91158845	-0.151	ENSMUSG00000019961|Tmpo|chr10|-|SE|91153277|91153397|91153084|91153180|91158747|91158845|NEG
ENSMUSG00000047412|Zbtb44|chr9|+|A3SS|31064178|31064342|31064232|31064342|31062040|31062125	-0.15	ENSMUSG00000047412|Zbtb44|chr9|+|A3SS|31064178|31064342|31064232|31064342|31062040|31062125|NEG
ENSMUSG00000021033|Gstz1|chr12|+|SE|87159077|87159145|87157892|87157944|87159639|87159720	-0.149	ENSMUSG00000021033|Gstz1|chr12|+|SE|87159077|87159145|87157892|87157944|87159639|87159720|NEG
ENSMUSG00000020166|Cnot2|chr10|-|A3SS|116549032|116549175|116549032|116549105|116581452|116581483	-0.148	ENSMUSG00000020166|Cnot2|chr10|-|A3SS|116549032|116549175|116549032|116549105|116581452|116581483|NEG
ENSMUSG00000041815|Poldip3|chr15|-|SE|83137467|83137554|83135293|83135389|83138131|83138522	-0.148	ENSMUSG00000041815|Poldip3|chr15|-|SE|83137467|83137554|83135293|83135389|83138131|83138522|NEG
ENSMUSG00000023286|Ube2j2|chr4|+|SE|155946254|155946417|155943849|155944150|155949006|155949137	-0.147	ENSMUSG00000023286|Ube2j2|chr4|+|SE|155946254|155946417|155943849|155944150|155949006|155949137|NEG
ENSMUSG00000020652|Cenpo|chr12|-|SE|4231515|4231682|4217207|4217322|4233530|4233657	-0.147	ENSMUSG00000020652|Cenpo|chr12|-|SE|4231515|4231682|4217207|4217322|4233530|4233657|NEG
ENSMUSG00000028797|Tmem234|chr4|+|SE|129602194|129602261|129600982|129601134|129607086|129607162	-0.146	ENSMUSG00000028797|Tmem234|chr4|+|SE|129602194|129602261|129600982|129601134|129607086|129607162|NEG
ENSMUSG00000039662|Icmt|chr4|+|SE|152299136|152299245|152298684|152298773|152299670|152299840	-0.144	ENSMUSG00000039662|Icmt|chr4|+|SE|152299136|152299245|152298684|152298773|152299670|152299840|NEG
ENSMUSG00000041890|Git2|chr5|-|SE|114743730|114743880|114739032|114739281|114745428|114745571	-0.144	ENSMUSG00000041890|Git2|chr5|-|SE|114743730|114743880|114739032|114739281|114745428|114745571|NEG
ENSMUSG00000055447|Cd47|chr16|+|SE|49869017|49869080|49867764|49868112|49884164|49884254	-0.142	ENSMUSG00000055447|Cd47|chr16|+|SE|49869017|49869080|49867764|49868112|49884164|49884254|NEG
ENSMUSG00000027639|Samhd1|chr2|-|SE|157101320|157101443|157099400|157099503|157101720|157101858	-0.142	ENSMUSG00000027639|Samhd1|chr2|-|SE|157101320|157101443|157099400|157099503|157101720|157101858|NEG
ENSMUSG00000026977|Marchf7|chr2|+|A3SS|60233898|60234997|60233933|60234997|60232199|60232367	-0.141	ENSMUSG00000026977|Marchf7|chr2|+|A3SS|60233898|60234997|60233933|60234997|60232199|60232367|NEG
ENSMUSG00000000326|Comt|chr16|-|SE|18424303|18424360|18411689|18411957|18426355|18426604	-0.141	ENSMUSG00000000326|Comt|chr16|-|SE|18424303|18424360|18411689|18411957|18426355|18426604|NEG
ENSMUSG00000030279|C2cd5|chr6|-|SE|143020323|143020374|143017882|143018073|143029159|143029246	-0.14	ENSMUSG00000030279|C2cd5|chr6|-|SE|143020323|143020374|143017882|143018073|143029159|143029246|NEG
ENSMUSG00000006498|Ptbp1|chr10|+|SE|79860116|79860194|79859780|79859955|79860823|79860969	-0.14	ENSMUSG00000006498|Ptbp1|chr10|+|SE|79860116|79860194|79859780|79859955|79860823|79860969|NEG
ENSMUSG00000004980|Hnrnpa2b1|chr6|-|SE|51461919|51462055|51461120|51461433|51463410|51463493	-0.138	ENSMUSG00000004980|Hnrnpa2b1|chr6|-|SE|51461919|51462055|51461120|51461433|51463410|51463493|NEG
ENSMUSG00000053332|Gas5|chr1|+|A5SS|161036819|161037164|161036819|161036852|161037287|161037315	-0.136	ENSMUSG00000053332|Gas5|chr1|+|A5SS|161036819|161037164|161036819|161036852|161037287|161037315|NEG
ENSMUSG00000020827|Mink1|chr11|+|SE|70609407|70609431|70609165|70609254|70609553|70609717	-0.135	ENSMUSG00000020827|Mink1|chr11|+|SE|70609407|70609431|70609165|70609254|70609553|70609717|NEG
ENSMUSG00000032540|Abhd5|chr9|+|SE|122365135|122365221|122351607|122351839|122367888|122368261	-0.134	ENSMUSG00000032540|Abhd5|chr9|+|SE|122365135|122365221|122351607|122351839|122367888|122368261|NEG
ENSMUSG00000011257|Pabpc4|chr4|+|SE|123295749|123295836|123295201|123295273|123295929|123296057	-0.134	ENSMUSG00000011257|Pabpc4|chr4|+|SE|123295749|123295836|123295201|123295273|123295929|123296057|NEG
ENSMUSG00000015357|Clpx|chr9|+|SE|65312097|65312139|65310151|65310311|65316643|65316820	-0.133	ENSMUSG00000015357|Clpx|chr9|+|SE|65312097|65312139|65310151|65310311|65316643|65316820|NEG
ENSMUSG00000030246|Ldhb|chr6|-|SE|142492492|142492616|142490248|142490604|142494099|142494217	-0.133	ENSMUSG00000030246|Ldhb|chr6|-|SE|142492492|142492616|142490248|142490604|142494099|142494217|NEG
ENSMUSG00000092203|1110038B12Rik|chr17|-|SE|34951884|34951925|34950697|34950847|34952135|34952173	-0.133	ENSMUSG00000092203|1110038B12Rik|chr17|-|SE|34951884|34951925|34950697|34950847|34952135|34952173|NEG
ENSMUSG00000029782|Tmem209|chr6|-|SE|30506785|30506917|30505732|30505974|30508453|30508512	-0.132	ENSMUSG00000029782|Tmem209|chr6|-|SE|30506785|30506917|30505732|30505974|30508453|30508512|NEG
ENSMUSG00000032280|Tle3|chr9|+|SE|61403451|61403468|61401852|61402057|61407353|61407439	-0.131	ENSMUSG00000032280|Tle3|chr9|+|SE|61403451|61403468|61401852|61402057|61407353|61407439|NEG
ENSMUSG00000030766|Arhgap17|chr7|-|SE|123285419|123285467|123279217|123280116|123286497|123287013	-0.131	ENSMUSG00000030766|Arhgap17|chr7|-|SE|123285419|123285467|123279217|123280116|123286497|123287013|NEG
ENSMUSG00000041926|Rnpep|chr1|-|SE|135272361|135272478|135271528|135271764|135277388|135277537	-0.13	ENSMUSG00000041926|Rnpep|chr1|-|SE|135272361|135272478|135271528|135271764|135277388|135277537|NEG
ENSMUSG00000029086|Prom1|chr5|-|SE|44001269|44001293|43995074|43995114|44001785|44001901	-0.129	ENSMUSG00000029086|Prom1|chr5|-|SE|44001269|44001293|43995074|43995114|44001785|44001901|NEG
ENSMUSG00000025353|Ormdl2|chr10|-|SE|128820260|128820560|128819953|128820105|128821541|128821606	-0.129	ENSMUSG00000025353|Ormdl2|chr10|-|SE|128820260|128820560|128819953|128820105|128821541|128821606|NEG
ENSMUSG00000000827|Tpd52l2|chr2|+|SE|181502875|181502935|181501904|181502053|181508165|181508267	-0.129	ENSMUSG00000000827|Tpd52l2|chr2|+|SE|181502875|181502935|181501904|181502053|181508165|181508267|NEG
ENSMUSG00000020859|Spag9|chr11|+|SE|94113262|94113301|94112032|94112146|94114172|94114349	-0.128	ENSMUSG00000020859|Spag9|chr11|+|SE|94113262|94113301|94112032|94112146|94114172|94114349|NEG
ENSMUSG00000020608|Smc6|chr12|+|SE|11276259|11276365|11271728|11271871|11279604|11279727	-0.127	ENSMUSG00000020608|Smc6|chr12|+|SE|11276259|11276365|11271728|11271871|11279604|11279727|NEG
ENSMUSG00000025353|Ormdl2|chr10|-|SE|128820260|128820435|128819953|128820105|128821541|128821645	-0.125	ENSMUSG00000025353|Ormdl2|chr10|-|SE|128820260|128820435|128819953|128820105|128821541|128821645|NEG
ENSMUSG00000025939|Ube2w|chr1|-|A3SS|16585275|16585431|16585275|16585352|16597950|16598053	-0.125	ENSMUSG00000025939|Ube2w|chr1|-|A3SS|16585275|16585431|16585275|16585352|16597950|16598053|NEG
ENSMUSG00000052337|Immt|chr6|+|A3SS|71852729|71852867|71852762|71852867|71851771|71851880	-0.125	ENSMUSG00000052337|Immt|chr6|+|A3SS|71852729|71852867|71852762|71852867|71851771|71851880|NEG
ENSMUSG00000066568|Lsm14a|chr7|-|SE|34357765|34357942|34357433|34357496|34365614|34365737	-0.124	ENSMUSG00000066568|Lsm14a|chr7|-|SE|34357765|34357942|34357433|34357496|34365614|34365737|NEG
ENSMUSG00000002833|Hdgfl2|chr17|+|A3SS|56096820|56097016|56096847|56097016|56096204|56096276	-0.124	ENSMUSG00000002833|Hdgfl2|chr17|+|A3SS|56096820|56097016|56096847|56097016|56096204|56096276|NEG
ENSMUSG00000025558|Dock9|chr14|-|SE|121577346|121577424|121575912|121576019|121578154|121578212	-0.124	ENSMUSG00000025558|Dock9|chr14|-|SE|121577346|121577424|121575912|121576019|121578154|121578212|NEG
ENSMUSG00000024795|Kif20b|chr19|+|A3SS|34941212|34941441|34941332|34941441|34940092|34940231	-0.123	ENSMUSG00000024795|Kif20b|chr19|+|A3SS|34941212|34941441|34941332|34941441|34940092|34940231|NEG
ENSMUSG00000026087|Mrpl30|chr1|+|SE|37892942|37893023|37890476|37890584|37893938|37893984	-0.123	ENSMUSG00000026087|Mrpl30|chr1|+|SE|37892942|37893023|37890476|37890584|37893938|37893984|NEG
ENSMUSG00000021124|Vti1b|chr12|-|SE|79166350|79166409|79164947|79165139|79172219|79172667	-0.121	ENSMUSG00000021124|Vti1b|chr12|-|SE|79166350|79166409|79164947|79165139|79172219|79172667|NEG
ENSMUSG00000023048|Prr13|chr15|+|SE|102459463|102459581|102459174|102459255|102460107|102460146	-0.12	ENSMUSG00000023048|Prr13|chr15|+|SE|102459463|102459581|102459174|102459255|102460107|102460146|NEG
ENSMUSG00000092203|1110038B12Rik|chr17|-|MXE|34950697|34950847|34951884|34951925|34950240|34950475|34952135|34952173	-0.12	ENSMUSG00000092203|1110038B12Rik|chr17|-|MXE|34950697|34950847|34951884|34951925|34950240|34950475|34952135|34952173|NEG
ENSMUSG00000034681|Rnps1|chr17|+|SE|24418037|24418218|24415040|24415162|24418456|24418612	-0.12	ENSMUSG00000034681|Rnps1|chr17|+|SE|24418037|24418218|24415040|24415162|24418456|24418612|NEG
ENSMUSG00000026288|Inpp5d|chr1|+|RI|87715037|87715313|87715037|87715093|87715276|87715313	-0.119	ENSMUSG00000026288|Inpp5d|chr1|+|RI|87715037|87715313|87715037|87715093|87715276|87715313|NEG
ENSMUSG00000001143|Lman2l|chr1|-|SE|36438749|36438832|36428299|36428461|36439608|36439668	-0.119	ENSMUSG00000001143|Lman2l|chr1|-|SE|36438749|36438832|36428299|36428461|36439608|36439668|NEG
ENSMUSG00000021905|Dph3|chr14|-|SE|32084906|32084981|32080568|32083246|32085409|32085609	-0.119	ENSMUSG00000021905|Dph3|chr14|-|SE|32084906|32084981|32080568|32083246|32085409|32085609|NEG
ENSMUSG00000058835|Abi1|chr2|-|SE|22963213|22963228|22962400|22962501|22971082|22971259	-0.119	ENSMUSG00000058835|Abi1|chr2|-|SE|22963213|22963228|22962400|22962501|22971082|22971259|NEG
ENSMUSG00000036167|Pphln1|chr15|+|SE|93420283|93420490|93410691|93410783|93424013|93424075	-0.119	ENSMUSG00000036167|Pphln1|chr15|+|SE|93420283|93420490|93410691|93410783|93424013|93424075|NEG
ENSMUSG00000041890|Git2|chr5|-|SE|114743775|114743880|114739032|114739281|114745428|114745571	-0.118	ENSMUSG00000041890|Git2|chr5|-|SE|114743775|114743880|114739032|114739281|114745428|114745571|NEG
ENSMUSG00000059669|Taf1b|chr12|+|SE|24509083|24509181|24504946|24505034|24509453|24509549	-0.118	ENSMUSG00000059669|Taf1b|chr12|+|SE|24509083|24509181|24504946|24505034|24509453|24509549|NEG
ENSMUSG00000038773|Kdm3b|chr18|+|SE|34803449|34804049|34799284|34799359|34808240|34809489	-0.117	ENSMUSG00000038773|Kdm3b|chr18|+|SE|34803449|34804049|34799284|34799359|34808240|34809489|NEG
ENSMUSG00000037364|Srrt|chr5|-|A3SS|137295986|137296113|137295986|137296092|137296217|137296307	-0.117	ENSMUSG00000037364|Srrt|chr5|-|A3SS|137295986|137296113|137295986|137296092|137296217|137296307|NEG
ENSMUSG00000028759|Hp1bp3|chr4|+|SE|138221525|138221723|138217130|138217294|138222088|138222188	-0.116	ENSMUSG00000028759|Hp1bp3|chr4|+|SE|138221525|138221723|138217130|138217294|138222088|138222188|NEG
ENSMUSG00000002107|Celf2|chr2|-|SE|6549831|6549975|6546239|6547213|6553784|6553964	-0.116	ENSMUSG00000002107|Celf2|chr2|-|SE|6549831|6549975|6546239|6547213|6553784|6553964|NEG
ENSMUSG00000017119|Nbr1|chr11|+|SE|101577193|101577251|101576302|101576409|101577931|101578037	-0.115	ENSMUSG00000017119|Nbr1|chr11|+|SE|101577193|101577251|101576302|101576409|101577931|101578037|NEG
ENSMUSG00000027206|Cops2|chr2|-|A3SS|125842621|125842732|125842621|125842711|125844809|125844935	-0.115	ENSMUSG00000027206|Cops2|chr2|-|A3SS|125842621|125842732|125842621|125842711|125844809|125844935|NEG
ENSMUSG00000014075|Tctex1d2|chr16|+|SE|32425240|32425310|32422819|32422953|32426857|32426921	-0.115	ENSMUSG00000014075|Tctex1d2|chr16|+|SE|32425240|32425310|32422819|32422953|32426857|32426921|NEG
ENSMUSG00000036639|Nudt1|chr5|+|SE|140332422|140332473|140331908|140331955|140334454|140334619	-0.114	ENSMUSG00000036639|Nudt1|chr5|+|SE|140332422|140332473|140331908|140331955|140334454|140334619|NEG
ENSMUSG00000057738|Sptan1|chr2|+|SE|30014157|30014172|30013675|30013838|30015588|30015720	-0.114	ENSMUSG00000057738|Sptan1|chr2|+|SE|30014157|30014172|30013675|30013838|30015588|30015720|NEG
ENSMUSG00000036352|Ubac1|chr2|-|SE|26005325|26005464|25998542|25999067|26006526|26006613	-0.114	ENSMUSG00000036352|Ubac1|chr2|-|SE|26005325|26005464|25998542|25999067|26006526|26006613|NEG
ENSMUSG00000068823|Csde1|chr3|+|SE|103040440|103040533|103039932|103040042|103041144|103041242	-0.113	ENSMUSG00000068823|Csde1|chr3|+|SE|103040440|103040533|103039932|103040042|103041144|103041242|NEG
ENSMUSG00000031386|Hcfc1|chrX|-|A3SS|73947841|73948418|73947841|73948286|73948901|73949065	-0.113	ENSMUSG00000031386|Hcfc1|chrX|-|A3SS|73947841|73948418|73947841|73948286|73948901|73949065|NEG
ENSMUSG00000021115|Vrk1|chr12|+|SE|106073618|106073678|106070524|106070615|106075006|106075200	-0.112	ENSMUSG00000021115|Vrk1|chr12|+|SE|106073618|106073678|106070524|106070615|106075006|106075200|NEG
ENSMUSG00000029782|Tmem209|chr6|-|SE|30508665|30508802|30506785|30508512|30509684|30509715	-0.112	ENSMUSG00000029782|Tmem209|chr6|-|SE|30508665|30508802|30506785|30508512|30509684|30509715|NEG
ENSMUSG00000036371|Serbp1|chr6|+|A3SS|67272818|67272938|67272863|67272938|67272138|67272228	-0.111	ENSMUSG00000036371|Serbp1|chr6|+|A3SS|67272818|67272938|67272863|67272938|67272138|67272228|NEG
ENSMUSG00000036893|Ehmt1|chr2|-|A3SS|24863771|24863929|24863771|24863908|24877454|24877626	-0.111	ENSMUSG00000036893|Ehmt1|chr2|-|A3SS|24863771|24863929|24863771|24863908|24877454|24877626|NEG
ENSMUSG00000039361|Picalm|chr7|+|SE|90182218|90182368|90177499|90177603|90189149|90189257	-0.111	ENSMUSG00000039361|Picalm|chr7|+|SE|90182218|90182368|90177499|90177603|90189149|90189257|NEG
ENSMUSG00000027366|Sppl2a|chr2|-|SE|126913299|126913353|126912642|126912745|126913531|126913588	-0.11	ENSMUSG00000027366|Sppl2a|chr2|-|SE|126913299|126913353|126912642|126912745|126913531|126913588|NEG
ENSMUSG00000032316|Clk3|chr9|-|SE|57758626|57758723|57758283|57758350|57760823|57761040	-0.11	ENSMUSG00000032316|Clk3|chr9|-|SE|57758626|57758723|57758283|57758350|57760823|57761040|NEG
ENSMUSG00000002546|Golga2|chr2|+|SE|32293314|32293395|32292092|32292215|32296625|32296721	-0.109	ENSMUSG00000002546|Golga2|chr2|+|SE|32293314|32293395|32292092|32292215|32296625|32296721|NEG
ENSMUSG00000029823|Luc7l2|chr6|+|SE|38598784|38598814|38593377|38593469|38603276|38603468	-0.109	ENSMUSG00000029823|Luc7l2|chr6|+|SE|38598784|38598814|38593377|38593469|38603276|38603468|NEG
ENSMUSG00000026860|Sh3glb2|chr2|-|SE|30346058|30346073|30345698|30345939|30346352|30346453	-0.108	ENSMUSG00000026860|Sh3glb2|chr2|-|SE|30346058|30346073|30345698|30345939|30346352|30346453|NEG
ENSMUSG00000020843|Timm22|chr11|+|SE|76409641|76409838|76407142|76407442|76411126|76411199	-0.107	ENSMUSG00000020843|Timm22|chr11|+|SE|76409641|76409838|76407142|76407442|76411126|76411199|NEG
ENSMUSG00000022892|App|chr16|-|SE|85043575|85043743|85030231|85030365|85056323|85056526	-0.106	ENSMUSG00000022892|App|chr16|-|SE|85043575|85043743|85030231|85030365|85056323|85056526|NEG
ENSMUSG00000034908|Sidt2|chr9|-|SE|45947628|45947697|45946983|45947055|45947835|45947888	-0.106	ENSMUSG00000034908|Sidt2|chr9|-|SE|45947628|45947697|45946983|45947055|45947835|45947888|NEG
ENSMUSG00000022106|Rcbtb2|chr14|+|SE|73151532|73151615|73142706|73143188|73154314|73154408	-0.106	ENSMUSG00000022106|Rcbtb2|chr14|+|SE|73151532|73151615|73142706|73143188|73154314|73154408|NEG
ENSMUSG00000019813|Cep57l1|chr10|-|SE|41781483|41781550|41745770|41745921|41809572|41809613	-0.105	ENSMUSG00000019813|Cep57l1|chr10|-|SE|41781483|41781550|41745770|41745921|41809572|41809613|NEG
ENSMUSG00000020608|Smc6|chr12|+|SE|11273993|11274111|11271728|11271871|11279604|11279741	-0.105	ENSMUSG00000020608|Smc6|chr12|+|SE|11273993|11274111|11271728|11271871|11279604|11279741|NEG
ENSMUSG00000038696|Mapkap1|chr2|+|SE|34432002|34432330|34407182|34407254|34435132|34435222	-0.104	ENSMUSG00000038696|Mapkap1|chr2|+|SE|34432002|34432330|34407182|34407254|34435132|34435222|NEG
ENSMUSG00000021144|Mta1|chr12|+|SE|113133540|113133576|113133184|113133337|113135796|113135828	-0.101	ENSMUSG00000021144|Mta1|chr12|+|SE|113133540|113133576|113133184|113133337|113135796|113135828|NEG
ENSMUSG00000030269|Mtmr14|chr6|+|A3SS|113277789|113277945|113277830|113277945|113270521|113270701	-0.1	ENSMUSG00000030269|Mtmr14|chr6|+|A3SS|113277789|113277945|113277830|113277945|113270521|113270701|NEG
ENSMUSG00000020003|Pex7|chr10|-|SE|19894724|19894802|19894249|19894358|19904562|19904713	-0.099	ENSMUSG00000020003|Pex7|chr10|-|SE|19894724|19894802|19894249|19894358|19904562|19904713|NEG
ENSMUSG00000026662|Sephs1|chr2|+|SE|4889182|4889286|4884331|4884605|4891586|4891694	-0.097	ENSMUSG00000026662|Sephs1|chr2|+|SE|4889182|4889286|4884331|4884605|4891586|4891694|NEG
ENSMUSG00000020594|Pum2|chr12|+|A3SS|8718987|8719113|8719005|8719113|8713843|8713937	-0.097	ENSMUSG00000020594|Pum2|chr12|+|A3SS|8718987|8719113|8719005|8719113|8713843|8713937|NEG
ENSMUSG00000022681|Ntan1|chr16|+|SE|13834680|13834794|13832336|13832434|13835134|13835448	-0.096	ENSMUSG00000022681|Ntan1|chr16|+|SE|13834680|13834794|13832336|13832434|13835134|13835448|NEG
ENSMUSG00000007610|Gtpbp3|chr8|+|A3SS|71490654|71490967|71490894|71490967|71490334|71490537	-0.096	ENSMUSG00000007610|Gtpbp3|chr8|+|A3SS|71490654|71490967|71490894|71490967|71490334|71490537|NEG
ENSMUSG00000059208|Hnrnpm|chr17|-|RI|33666493|33666685|33666493|33666529|33666646|33666685	-0.096	ENSMUSG00000059208|Hnrnpm|chr17|-|RI|33666493|33666685|33666493|33666529|33666646|33666685|NEG
ENSMUSG00000005312|Ubqln1|chr13|-|SE|58180821|58180905|58179552|58179668|58183181|58183324	-0.096	ENSMUSG00000005312|Ubqln1|chr13|-|SE|58180821|58180905|58179552|58179668|58183181|58183324|NEG
ENSMUSG00000026584|Scyl3|chr1|+|A3SS|163946163|163946348|163946202|163946348|163944795|163944935	-0.095	ENSMUSG00000026584|Scyl3|chr1|+|A3SS|163946163|163946348|163946202|163946348|163944795|163944935|NEG
ENSMUSG00000031505|Naxd|chr8|+|SE|11511876|11511997|11510226|11510347|11512894|11513287	-0.095	ENSMUSG00000031505|Naxd|chr8|+|SE|11511876|11511997|11510226|11510347|11512894|11513287|NEG
ENSMUSG00000035569|Ankrd11|chr8|-|SE|122900601|122900698|122899978|122900149|122908667|122908806	-0.095	ENSMUSG00000035569|Ankrd11|chr8|-|SE|122900601|122900698|122899978|122900149|122908667|122908806|NEG
ENSMUSG00000021457|Syk|chr13|+|SE|52624707|52624776|52623244|52623276|52631656|52631744	-0.094	ENSMUSG00000021457|Syk|chr13|+|SE|52624707|52624776|52623244|52623276|52631656|52631744|NEG
ENSMUSG00000021144|Mta1|chr12|+|A3SS|113131315|113131467|113131362|113131467|113130884|113131000	-0.093	ENSMUSG00000021144|Mta1|chr12|+|A3SS|113131315|113131467|113131362|113131467|113130884|113131000|NEG
ENSMUSG00000024969|Mark2|chr19|-|SE|7279985|7280012|7278041|7278086|7280997|7281255	-0.09	ENSMUSG00000024969|Mark2|chr19|-|SE|7279985|7280012|7278041|7278086|7280997|7281255|NEG
ENSMUSG00000036167|Pphln1|chr15|+|SE|93452116|93452173|93441500|93441712|93455450|93455530	-0.09	ENSMUSG00000036167|Pphln1|chr15|+|SE|93452116|93452173|93441500|93441712|93455450|93455530|NEG
ENSMUSG00000003824|Syce2|chr8|+|SE|84883430|84883584|84872701|84872832|84885934|84886123	-0.09	ENSMUSG00000003824|Syce2|chr8|+|SE|84883430|84883584|84872701|84872832|84885934|84886123|NEG
ENSMUSG00000024283|Wac|chr18|+|SE|7910515|7910824|7905931|7906044|7916051|7916284	-0.089	ENSMUSG00000024283|Wac|chr18|+|SE|7910515|7910824|7905931|7906044|7916051|7916284|NEG
ENSMUSG00000032307|Ube2q2|chr9|+|SE|55168202|55168307|55162967|55163069|55176190|55176247	-0.088	ENSMUSG00000032307|Ube2q2|chr9|+|SE|55168202|55168307|55162967|55163069|55176190|55176247|NEG
ENSMUSG00000024053|Emilin2|chr17|-|A3SS|71255118|71255247|71255118|71255214|71255979|71256012	-0.088	ENSMUSG00000024053|Emilin2|chr17|-|A3SS|71255118|71255247|71255118|71255214|71255979|71256012|NEG
ENSMUSG00000021068|Nin|chr12|-|SE|70042131|70044252|70040754|70040880|70045146|70045637	-0.087	ENSMUSG00000021068|Nin|chr12|-|SE|70042131|70044252|70040754|70040880|70045146|70045637|NEG
ENSMUSG00000027763|Mbnl1|chr3|+|MXE|60621422|60621458|60622145|60622240|60615619|60615773|60625123|60625198	-0.087	ENSMUSG00000027763|Mbnl1|chr3|+|MXE|60621422|60621458|60622145|60622240|60615619|60615773|60625123|60625198|NEG
ENSMUSG00000038005|Hpf1|chr8|+|SE|60895460|60895650|60893700|60893860|60896737|60896836	-0.087	ENSMUSG00000038005|Hpf1|chr8|+|SE|60895460|60895650|60893700|60893860|60896737|60896836|NEG
ENSMUSG00000026034|Clk1|chr1|-|SE|58417012|58417179|58414589|58414684|58417266|58417383	-0.087	ENSMUSG00000026034|Clk1|chr1|-|SE|58417012|58417179|58414589|58414684|58417266|58417383|NEG
ENSMUSG00000039285|Azi2|chr9|+|SE|118049896|118049996|118049309|118049435|118051353|118051502	-0.087	ENSMUSG00000039285|Azi2|chr9|+|SE|118049896|118049996|118049309|118049435|118051353|118051502|NEG
ENSMUSG00000041890|Git2|chr5|-|MXE|114739032|114739281|114743775|114743880|114733860|114733943|114745428|114745571	-0.087	ENSMUSG00000041890|Git2|chr5|-|MXE|114739032|114739281|114743775|114743880|114733860|114733943|114745428|114745571|NEG
ENSMUSG00000025353|Ormdl2|chr10|-|SE|128820260|128820514|128819953|128820105|128821541|128821594	-0.086	ENSMUSG00000025353|Ormdl2|chr10|-|SE|128820260|128820514|128819953|128820105|128821541|128821594|NEG
ENSMUSG00000027763|Mbnl1|chr3|+|SE|60621422|60621458|60615619|60615773|60622145|60622240	-0.086	ENSMUSG00000027763|Mbnl1|chr3|+|SE|60621422|60621458|60615619|60615773|60622145|60622240|NEG
ENSMUSG00000078713|Tomm5|chr4|-|SE|45106838|45106888|45105211|45105644|45107912|45108108	-0.086	ENSMUSG00000078713|Tomm5|chr4|-|SE|45106838|45106888|45105211|45105644|45107912|45108108|NEG
ENSMUSG00000028034|Fubp1|chr3|+|A3SS|152232394|152234570|152234523|152234570|152231876|152232022	-0.086	ENSMUSG00000028034|Fubp1|chr3|+|A3SS|152232394|152234570|152234523|152234570|152231876|152232022|NEG
ENSMUSG00000018909|Arrb1|chr7|+|SE|99597035|99597059|99596022|99596106|99598490|99598561	-0.085	ENSMUSG00000018909|Arrb1|chr7|+|SE|99597035|99597059|99596022|99596106|99598490|99598561|NEG
ENSMUSG00000015889|Lta4h|chr10|+|SE|93482249|93482332|93480690|93480786|93482961|93483001	-0.085	ENSMUSG00000015889|Lta4h|chr10|+|SE|93482249|93482332|93480690|93480786|93482961|93483001|NEG
ENSMUSG00000024691|Fam111a|chr19|+|SE|12583922|12584122|12577089|12577170|12586834|12589762	-0.084	ENSMUSG00000024691|Fam111a|chr19|+|SE|12583922|12584122|12577089|12577170|12586834|12589762|NEG
ENSMUSG00000059456|Ptk2b|chr14|-|SE|66163024|66163150|66158530|66158677|66165263|66165329	-0.084	ENSMUSG00000059456|Ptk2b|chr14|-|SE|66163024|66163150|66158530|66158677|66165263|66165329|NEG
ENSMUSG00000008398|Elk3|chr10|-|RI|93264879|93265680|93264879|93265010|93265336|93265680	-0.084	ENSMUSG00000008398|Elk3|chr10|-|RI|93264879|93265680|93264879|93265010|93265336|93265680|NEG
ENSMUSG00000064215|Ifi27|chr12|+|MXE|103437389|103437524|103437675|103437705|103436562|103436682|103439400|103439562	-0.084	ENSMUSG00000064215|Ifi27|chr12|+|MXE|103437389|103437524|103437675|103437705|103436562|103436682|103439400|103439562|NEG
ENSMUSG00000033335|Dnm2|chr9|+|MXE|21478898|21479037|21480406|21480545|21478280|21478348|21481332|21481419	-0.084	ENSMUSG00000033335|Dnm2|chr9|+|MXE|21478898|21479037|21480406|21480545|21478280|21478348|21481332|21481419|NEG
ENSMUSG00000016494|Cd34|chr1|+|A3SS|194959779|194961279|194959935|194961279|194959065|194959230	-0.081	ENSMUSG00000016494|Cd34|chr1|+|A3SS|194959779|194961279|194959935|194961279|194959065|194959230|NEG
ENSMUSG00000008200|Fnbp4|chr2|+|SE|90774749|90774848|90768661|90768700|90775904|90776221	-0.08	ENSMUSG00000008200|Fnbp4|chr2|+|SE|90774749|90774848|90768661|90768700|90775904|90776221|NEG
ENSMUSG00000030189|Ybx3|chr6|-|SE|131375973|131376180|131370322|131370414|131379357|131379480	-0.08	ENSMUSG00000030189|Ybx3|chr6|-|SE|131375973|131376180|131370322|131370414|131379357|131379480|NEG
ENSMUSG00000015247|Nipsnap3b|chr4|+|SE|53020181|53020331|53017048|53017207|53021110|53021197	-0.079	ENSMUSG00000015247|Nipsnap3b|chr4|+|SE|53020181|53020331|53017048|53017207|53021110|53021197|NEG
ENSMUSG00000023345|Poc1a|chr9|+|A3SS|106329872|106330016|106329900|106330016|106307940|106308033	-0.079	ENSMUSG00000023345|Poc1a|chr9|+|A3SS|106329872|106330016|106329900|106330016|106307940|106308033|NEG
ENSMUSG00000032212|Sltm|chr9|+|SE|70583931|70584112|70581300|70581464|70584752|70584877	-0.079	ENSMUSG00000032212|Sltm|chr9|+|SE|70583931|70584112|70581300|70581464|70584752|70584877|NEG
ENSMUSG00000025332|Kdm5c|chrX|+|SE|152239629|152239752|152237632|152237710|152240025|152240196	-0.078	ENSMUSG00000025332|Kdm5c|chrX|+|SE|152239629|152239752|152237632|152237710|152240025|152240196|NEG
ENSMUSG00000029385|Ccng2|chr5|+|RI|93270793|93271279|93270793|93271044|93271200|93271279	-0.077	ENSMUSG00000029385|Ccng2|chr5|+|RI|93270793|93271279|93270793|93271044|93271200|93271279|NEG
ENSMUSG00000027306|Nusap1|chr2|+|SE|119633719|119633818|119630336|119630505|119635477|119635587	-0.076	ENSMUSG00000027306|Nusap1|chr2|+|SE|119633719|119633818|119630336|119630505|119635477|119635587|NEG
ENSMUSG00000042472|Zfp410|chr12|+|A3SS|84325570|84325789|84325602|84325789|84322883|84323019	-0.076	ENSMUSG00000042472|Zfp410|chr12|+|A3SS|84325570|84325789|84325602|84325789|84322883|84323019|NEG
ENSMUSG00000024150|Mcfd2|chr17|-|SE|87258749|87258881|87257927|87258089|87265834|87265895	-0.076	ENSMUSG00000024150|Mcfd2|chr17|-|SE|87258749|87258881|87257927|87258089|87265834|87265895|NEG
ENSMUSG00000021111|Papola|chr12|+|SE|105808554|105808666|105807164|105807218|105809342|105809432	-0.073	ENSMUSG00000021111|Papola|chr12|+|SE|105808554|105808666|105807164|105807218|105809342|105809432|NEG
ENSMUSG00000026245|Farsb|chr1|-|A3SS|78479956|78480111|78479956|78480013|78482307|78482363	-0.073	ENSMUSG00000026245|Farsb|chr1|-|A3SS|78479956|78480111|78479956|78480013|78482307|78482363|NEG
ENSMUSG00000020692|Nle1|chr11|-|A3SS|82902994|82903197|82902994|82903133|82904089|82904136	-0.072	ENSMUSG00000020692|Nle1|chr11|-|A3SS|82902994|82903197|82902994|82903133|82904089|82904136|NEG
ENSMUSG00000020248|Nfyb|chr10|-|SE|82754964|82755095|82749286|82752604|82756701|82756795	-0.072	ENSMUSG00000020248|Nfyb|chr10|-|SE|82754964|82755095|82749286|82752604|82756701|82756795|NEG
ENSMUSG00000029472|Anapc5|chr5|-|A3SS|122800450|122800632|122800450|122800608|122802129|122802219	-0.071	ENSMUSG00000029472|Anapc5|chr5|-|A3SS|122800450|122800632|122800450|122800608|122802129|122802219|NEG
ENSMUSG00000019790|Stxbp5|chr10|-|A3SS|9769340|9769710|9769340|9769534|9770449|9770689	-0.07	ENSMUSG00000019790|Stxbp5|chr10|-|A3SS|9769340|9769710|9769340|9769534|9770449|9770689|NEG
ENSMUSG00000078919|Dpm1|chr2|-|A3SS|168211365|168211480|168211365|168211427|168212959|168213028	-0.07	ENSMUSG00000078919|Dpm1|chr2|-|A3SS|168211365|168211480|168211365|168211427|168212959|168213028|NEG
ENSMUSG00000013846|St3gal1|chr15|-|SE|67162986|67163051|67153042|67153170|67176631|67176712	-0.07	ENSMUSG00000013846|St3gal1|chr15|-|SE|67162986|67163051|67153042|67153170|67176631|67176712|NEG
ENSMUSG00000009687|Fxyd5|chr7|-|A3SS|31040182|31040272|31040182|31040221|31041396|31041457	-0.069	ENSMUSG00000009687|Fxyd5|chr7|-|A3SS|31040182|31040272|31040182|31040221|31041396|31041457|NEG
ENSMUSG00000022575|Gsdmd|chr15|+|A3SS|75864243|75864436|75864354|75864436|75863404|75863628	-0.067	ENSMUSG00000022575|Gsdmd|chr15|+|A3SS|75864243|75864436|75864354|75864436|75863404|75863628|NEG
ENSMUSG00000009687|Fxyd5|chr7|-|RI|31032729|31033018|31032729|31032880|31032972|31033018	-0.067	ENSMUSG00000009687|Fxyd5|chr7|-|RI|31032729|31033018|31032729|31032880|31032972|31033018|NEG
ENSMUSG00000064215|Ifi27|chr12|+|SE|103437675|103437705|103436562|103436682|103439400|103439562	-0.066	ENSMUSG00000064215|Ifi27|chr12|+|SE|103437675|103437705|103436562|103436682|103439400|103439562|NEG
ENSMUSG00000022971|Ifnar2|chr16|+|SE|91385941|91386065|91384982|91385024|91387943|91388116	-0.066	ENSMUSG00000022971|Ifnar2|chr16|+|SE|91385941|91386065|91384982|91385024|91387943|91388116|NEG
ENSMUSG00000025409|Mbd6|chr10|-|A3SS|127283024|127283162|127283024|127283088|127283391|127283444	-0.065	ENSMUSG00000025409|Mbd6|chr10|-|A3SS|127283024|127283162|127283024|127283088|127283391|127283444|NEG
ENSMUSG00000031729|Ist1|chr8|-|SE|109675642|109675802|109675375|109675424|109676757|109676850	-0.065	ENSMUSG00000031729|Ist1|chr8|-|SE|109675642|109675802|109675375|109675424|109676757|109676850|NEG
ENSMUSG00000033845|Mrpl15|chr1|-|SE|4783950|4784105|4782567|4782733|4785572|4785710	-0.064	ENSMUSG00000033845|Mrpl15|chr1|-|SE|4783950|4784105|4782567|4782733|4785572|4785710|NEG
ENSMUSG00000006169|Clint1|chr11|+|A3SS|45907839|45908044|45907893|45908044|45906180|45906467	-0.064	ENSMUSG00000006169|Clint1|chr11|+|A3SS|45907839|45908044|45907893|45908044|45906180|45906467|NEG
ENSMUSG00000042396|Rbm7|chr9|-|SE|48494282|48494387|48494018|48494181|48495154|48495294	-0.064	ENSMUSG00000042396|Rbm7|chr9|-|SE|48494282|48494387|48494018|48494181|48495154|48495294|NEG
ENSMUSG00000029780|Nt5c3|chr6|-|SE|56897774|56897829|56892789|56892888|56923671|56923819	-0.062	ENSMUSG00000029780|Nt5c3|chr6|-|SE|56897774|56897829|56892789|56892888|56923671|56923819|NEG
ENSMUSG00000026872|Zeb2|chr2|-|SE|45111019|45111170|45110015|45110157|45112822|45113245	-0.062	ENSMUSG00000026872|Zeb2|chr2|-|SE|45111019|45111170|45110015|45110157|45112822|45113245|NEG
ENSMUSG00000018008|Cyth4|chr15|+|SE|78606956|78607075|78604859|78605913|78608125|78608204	-0.062	ENSMUSG00000018008|Cyth4|chr15|+|SE|78606956|78607075|78604859|78605913|78608125|78608204|NEG
ENSMUSG00000031422|Morf4l2|chrX|-|SE|136735545|136735622|136732941|136734501|136739804|136739894	-0.061	ENSMUSG00000031422|Morf4l2|chrX|-|SE|136735545|136735622|136732941|136734501|136739804|136739894|NEG
ENSMUSG00000029422|Rsrc2|chr5|-|SE|123745496|123745589|123744954|123745111|123749288|123749371	-0.06	ENSMUSG00000029422|Rsrc2|chr5|-|SE|123745496|123745589|123744954|123745111|123749288|123749371|NEG
ENSMUSG00000031967|Afg3l1|chr8|+|SE|123499991|123500107|123498587|123498698|123501232|123501433	-0.06	ENSMUSG00000031967|Afg3l1|chr8|+|SE|123499991|123500107|123498587|123498698|123501232|123501433|NEG
ENSMUSG00000034786|Gpsm3|chr17|+|A3SS|34590741|34590941|34590779|34590941|34590460|34590563	-0.06	ENSMUSG00000034786|Gpsm3|chr17|+|A3SS|34590741|34590941|34590779|34590941|34590460|34590563|NEG
ENSMUSG00000022450|Ndufa6|chr15|-|SE|82350978|82351094|82350139|82350371|82354080|82354322	-0.06	ENSMUSG00000022450|Ndufa6|chr15|-|SE|82350978|82351094|82350139|82350371|82354080|82354322|NEG
ENSMUSG00000060261|Gtf2i|chr5|-|SE|134274538|134274595|134266542|134266656|134279436|134279514	-0.06	ENSMUSG00000060261|Gtf2i|chr5|-|SE|134274538|134274595|134266542|134266656|134279436|134279514|NEG
ENSMUSG00000028684|Urod|chr4|-|SE|116992563|116992725|116991620|116991758|116992825|116993023	-0.059	ENSMUSG00000028684|Urod|chr4|-|SE|116992563|116992725|116991620|116991758|116992825|116993023|NEG
ENSMUSG00000069089|Cdk7|chr13|-|SE|100717571|100717682|100716500|100716619|100719301|100719370	-0.058	ENSMUSG00000069089|Cdk7|chr13|-|SE|100717571|100717682|100716500|100716619|100719301|100719370|NEG
ENSMUSG00000024889|Rce1|chr19|-|A3SS|4624013|4624181|4624013|4624151|4624684|4624763	-0.058	ENSMUSG00000024889|Rce1|chr19|-|A3SS|4624013|4624181|4624013|4624151|4624684|4624763|NEG
ENSMUSG00000061613|U2af1|chr17|-|MXE|31651645|31651712|31652501|31652568|31648844|31648894|31654978|31655066	-0.057	ENSMUSG00000061613|U2af1|chr17|-|MXE|31651645|31651712|31652501|31652568|31648844|31648894|31654978|31655066|NEG
ENSMUSG00000037266|Rsrp1|chr4|+|SE|134925776|134925821|134925292|134925432|134926734|134926818	-0.057	ENSMUSG00000037266|Rsrp1|chr4|+|SE|134925776|134925821|134925292|134925432|134926734|134926818|NEG
ENSMUSG00000022892|App|chr16|-|SE|85040250|85040307|85030231|85030365|85043575|85043743	-0.057	ENSMUSG00000022892|App|chr16|-|SE|85040250|85040307|85030231|85030365|85043575|85043743|NEG
ENSMUSG00000031948|Kars|chr8|-|SE|112008206|112008386|112005631|112005788|112011209|112011266	-0.057	ENSMUSG00000031948|Kars|chr8|-|SE|112008206|112008386|112005631|112005788|112011209|112011266|NEG
ENSMUSG00000021585|Cast|chr13|-|SE|74748804|74748861|74748204|74748243|74754310|74754370	-0.056	ENSMUSG00000021585|Cast|chr13|-|SE|74748804|74748861|74748204|74748243|74754310|74754370|NEG
ENSMUSG00000025532|Crcp|chr5|+|SE|130042205|130042300|130037819|130037918|130048925|130048983	-0.055	ENSMUSG00000025532|Crcp|chr5|+|SE|130042205|130042300|130037819|130037918|130048925|130048983|NEG
ENSMUSG00000021000|Mia2|chr12|+|MXE|59144698|59144770|59146335|59146362|59137697|59137786|59146846|59146957	-0.055	ENSMUSG00000021000|Mia2|chr12|+|MXE|59144698|59144770|59146335|59146362|59137697|59137786|59146846|59146957|NEG
ENSMUSG00000061306|Slc38a10|chr11|-|SE|120141599|120141645|120140592|120140686|120147720|120147838	-0.054	ENSMUSG00000061306|Slc38a10|chr11|-|SE|120141599|120141645|120140592|120140686|120147720|120147838|NEG
ENSMUSG00000020366|Mapk9|chr11|+|MXE|49873835|49873907|49874263|49874335|49872733|49872899|49878230|49878413	-0.054	ENSMUSG00000020366|Mapk9|chr11|+|MXE|49873835|49873907|49874263|49874335|49872733|49872899|49878230|49878413|NEG
ENSMUSG00000020608|Smc6|chr12|+|SE|11276259|11276365|11273993|11274111|11279604|11279727	-0.054	ENSMUSG00000020608|Smc6|chr12|+|SE|11276259|11276365|11273993|11274111|11279604|11279727|NEG
ENSMUSG00000036948|BC037034|chr5|-|SE|138262846|138262976|138262169|138262744|138263066|138263162	-0.053	ENSMUSG00000036948|BC037034|chr5|-|SE|138262846|138262976|138262169|138262744|138263066|138263162|NEG
ENSMUSG00000021548|Ccnh|chr13|+|A3SS|85197350|85197561|85197530|85197561|85196251|85196325	-0.053	ENSMUSG00000021548|Ccnh|chr13|+|A3SS|85197350|85197561|85197530|85197561|85196251|85196325|NEG
ENSMUSG00000021764|Ndufs4|chr13|-|SE|114307816|114307890|114287794|114288866|114316856|114317029	-0.052	ENSMUSG00000021764|Ndufs4|chr13|-|SE|114307816|114307890|114287794|114288866|114316856|114317029|NEG
ENSMUSG00000028034|Fubp1|chr3|+|SE|152214824|152214887|152213976|152214067|152215591|152215630	-0.052	ENSMUSG00000028034|Fubp1|chr3|+|SE|152214824|152214887|152213976|152214067|152215591|152215630|NEG
ENSMUSG00000070003|Ssbp4|chr8|-|SE|70600008|70600062|70599839|70599899|70600395|70600485	0.051	ENSMUSG00000070003|Ssbp4|chr8|-|SE|70600008|70600062|70599839|70599899|70600395|70600485|POS
ENSMUSG00000035325|Sec31a|chr5|-|SE|100388533|100388611|100386127|100386203|100389067|100389106	0.052	ENSMUSG00000035325|Sec31a|chr5|-|SE|100388533|100388611|100386127|100386203|100389067|100389106|POS
ENSMUSG00000089847|Timm10b|chr7|+|RI|105640761|105641228|105640761|105640857|105641027|105641228	0.052	ENSMUSG00000089847|Timm10b|chr7|+|RI|105640761|105641228|105640761|105640857|105641027|105641228|POS
ENSMUSG00000075415|Fnbp1|chr2|-|SE|31052984|31053167|31040404|31040514|31054023|31054218	0.054	ENSMUSG00000075415|Fnbp1|chr2|-|SE|31052984|31053167|31040404|31040514|31054023|31054218|POS
ENSMUSG00000021111|Papola|chr12|+|SE|105833099|105833162|105829056|105829277|105834709|105834757	0.057	ENSMUSG00000021111|Papola|chr12|+|SE|105833099|105833162|105829056|105829277|105834709|105834757|POS
ENSMUSG00000037339|Fam53a|chr5|-|SE|33608330|33608489|33607463|33608227|33610431|33610486	0.059	ENSMUSG00000037339|Fam53a|chr5|-|SE|33608330|33608489|33607463|33608227|33610431|33610486|POS
ENSMUSG00000057375|Yipf1|chr4|+|SE|107336113|107336194|107318941|107319105|107336436|107336502	0.059	ENSMUSG00000057375|Yipf1|chr4|+|SE|107336113|107336194|107318941|107319105|107336436|107336502|POS
ENSMUSG00000047417|Rexo1|chr10|-|A3SS|80544282|80544444|80544282|80544420|80544759|80544873	0.06	ENSMUSG00000047417|Rexo1|chr10|-|A3SS|80544282|80544444|80544282|80544420|80544759|80544873|POS
ENSMUSG00000028760|Eif4g3|chr4|+|SE|138084256|138084370|138082892|138082988|138096751|138096931	0.06	ENSMUSG00000028760|Eif4g3|chr4|+|SE|138084256|138084370|138082892|138082988|138096751|138096931|POS
ENSMUSG00000020376|Rnf130|chr11|+|SE|50099245|50099339|50095775|50095980|50104548|50104753	0.061	ENSMUSG00000020376|Rnf130|chr11|+|SE|50099245|50099339|50095775|50095980|50104548|50104753|POS
ENSMUSG00000026034|Clk1|chr1|-|RI|58417012|58417383|58417012|58417179|58417266|58417383	0.061	ENSMUSG00000026034|Clk1|chr1|-|RI|58417012|58417383|58417012|58417179|58417266|58417383|POS
ENSMUSG00000032555|Topbp1|chr9|+|SE|103335811|103335958|103334055|103334179|103336063|103336166	0.062	ENSMUSG00000032555|Topbp1|chr9|+|SE|103335811|103335958|103334055|103334179|103336063|103336166|POS
ENSMUSG00000028859|Csf3r|chr4|+|MXE|126027188|126027316|126027316|126027400|126026080|126026179|126029762|126030062	0.062	ENSMUSG00000028859|Csf3r|chr4|+|MXE|126027188|126027316|126027316|126027400|126026080|126026179|126029762|126030062|POS
ENSMUSG00000057177|Gsk3a|chr7|-|RI|25229464|25230040|25229464|25229572|25229850|25230040	0.062	ENSMUSG00000057177|Gsk3a|chr7|-|RI|25229464|25230040|25229464|25229572|25229850|25230040|POS
ENSMUSG00000020311|Erlec1|chr11|-|SE|30935367|30935445|30934981|30935059|30939496|30939621	0.063	ENSMUSG00000020311|Erlec1|chr11|-|SE|30935367|30935445|30934981|30935059|30939496|30939621|POS
ENSMUSG00000045752|Tssc4|chr7|+|RI|143069935|143071087|143069935|143070292|143070791|143071087	0.063	ENSMUSG00000045752|Tssc4|chr7|+|RI|143069935|143071087|143069935|143070292|143070791|143071087|POS
ENSMUSG00000056032|BC018473|chr11|+|SE|116755099|116755210|116754333|116754489|116755292|116755842	0.063	ENSMUSG00000056032|BC018473|chr11|+|SE|116755099|116755210|116754333|116754489|116755292|116755842|POS
ENSMUSG00000014959|Gorasp2|chr2|+|SE|70672564|70672761|70661575|70661760|70676464|70676545	0.063	ENSMUSG00000014959|Gorasp2|chr2|+|SE|70672564|70672761|70661575|70661760|70676464|70676545|POS
ENSMUSG00000032366|Tpm1|chr9|-|MXE|67031950|67032026|67032465|67032541|67031451|67031514|67032793|67032864	0.065	ENSMUSG00000032366|Tpm1|chr9|-|MXE|67031950|67032026|67032465|67032541|67031451|67031514|67032793|67032864|POS
ENSMUSG00000021546|Hnrnpk|chr13|-|A3SS|58391238|58392476|58391238|58392416|58393195|58393365	0.067	ENSMUSG00000021546|Hnrnpk|chr13|-|A3SS|58391238|58392476|58391238|58392416|58393195|58393365|POS
ENSMUSG00000053332|Gas5|chr1|+|RI|161036819|161037164|161036819|161036852|161037123|161037164	0.068	ENSMUSG00000053332|Gas5|chr1|+|RI|161036819|161037164|161036819|161036852|161037123|161037164|POS
ENSMUSG00000005417|Mprip|chr11|+|SE|59772151|59772217|59771616|59771702|59775515|59776223	0.073	ENSMUSG00000005417|Mprip|chr11|+|SE|59772151|59772217|59771616|59771702|59775515|59776223|POS
ENSMUSG00000016921|Srsf6|chr2|+|SE|162932814|162933082|162931993|162932142|162933425|162933550	0.075	ENSMUSG00000016921|Srsf6|chr2|+|SE|162932814|162933082|162931993|162932142|162933425|162933550|POS
ENSMUSG00000021156|Zmynd11|chr13|-|SE|9712982|9713027|9710145|9710307|9720772|9720932	0.075	ENSMUSG00000021156|Zmynd11|chr13|-|SE|9712982|9713027|9710145|9710307|9720772|9720932|POS
ENSMUSG00000021000|Mia2|chr12|+|SE|59146335|59146362|59137697|59137786|59146846|59146872	0.076	ENSMUSG00000021000|Mia2|chr12|+|SE|59146335|59146362|59137697|59137786|59146846|59146872|POS
ENSMUSG00000092203|1110038B12Rik|chr17|-|SE|34950697|34950847|34950240|34950475|34951884|34951925	0.078	ENSMUSG00000092203|1110038B12Rik|chr17|-|SE|34950697|34950847|34950240|34950475|34951884|34951925|POS
ENSMUSG00000034867|Ankrd27|chr7|+|SE|35622304|35622349|35620542|35620662|35625646|35625766	0.079	ENSMUSG00000034867|Ankrd27|chr7|+|SE|35622304|35622349|35620542|35620662|35625646|35625766|POS
ENSMUSG00000026946|Nmi|chr2|-|SE|51949983|51950090|51948486|51948776|51952441|51952628	0.079	ENSMUSG00000026946|Nmi|chr2|-|SE|51949983|51950090|51948486|51948776|51952441|51952628|POS
ENSMUSG00000023994|Nfya|chr17|-|SE|48398981|48399065|48395649|48395796|48400437|48400580	0.08	ENSMUSG00000023994|Nfya|chr17|-|SE|48398981|48399065|48395649|48395796|48400437|48400580|POS
ENSMUSG00000001029|Icam2|chr11|-|SE|106381316|106381424|106380687|106380939|106382429|106382546	0.082	ENSMUSG00000001029|Icam2|chr11|-|SE|106381316|106381424|106380687|106380939|106382429|106382546|POS
ENSMUSG00000024483|Ankhd1|chr18|+|SE|36641398|36641478|36640264|36640360|36641576|36641693	0.082	ENSMUSG00000024483|Ankhd1|chr18|+|SE|36641398|36641478|36640264|36640360|36641576|36641693|POS
ENSMUSG00000029048|Rer1|chr4|-|SE|155083108|155083317|155082666|155082754|155086204|155086371	0.082	ENSMUSG00000029048|Rer1|chr4|-|SE|155083108|155083317|155082666|155082754|155086204|155086371|POS
ENSMUSG00000059552|Trp53|chr11|+|A3SS|69591253|69591872|69591349|69591872|69590655|69590762	0.084	ENSMUSG00000059552|Trp53|chr11|+|A3SS|69591253|69591872|69591349|69591872|69590655|69590762|POS
ENSMUSG00000058486|Wdr91|chr6|-|SE|34909713|34909827|34909460|34909540|34910696|34910842	0.086	ENSMUSG00000058486|Wdr91|chr6|-|SE|34909713|34909827|34909460|34909540|34910696|34910842|POS
ENSMUSG00000042520|Ubap2l|chr3|-|SE|90031310|90031370|90028324|90028377|90034064|90034177	0.086	ENSMUSG00000042520|Ubap2l|chr3|-|SE|90031310|90031370|90028324|90028377|90034064|90034177|POS
ENSMUSG00000020923|Ubtf|chr11|-|SE|102310925|102311036|102310442|102310576|102311379|102311500	0.089	ENSMUSG00000020923|Ubtf|chr11|-|SE|102310925|102311036|102310442|102310576|102311379|102311500|POS
ENSMUSG00000032294|Pkm|chr9|+|MXE|59675028|59675195|59675567|59675734|59671920|59672073|59678043|59678225	0.089	ENSMUSG00000032294|Pkm|chr9|+|MXE|59675028|59675195|59675567|59675734|59671920|59672073|59678043|59678225|POS
ENSMUSG00000038535|Zfp280d|chr9|+|SE|72318723|72318841|72312650|72312760|72319091|72319315	0.089	ENSMUSG00000038535|Zfp280d|chr9|+|SE|72318723|72318841|72312650|72312760|72319091|72319315|POS
ENSMUSG00000067367|Lyar|chr5|+|SE|38223133|38223227|38220519|38220635|38224626|38224797	0.09	ENSMUSG00000067367|Lyar|chr5|+|SE|38223133|38223227|38220519|38220635|38224626|38224797|POS
ENSMUSG00000090935|Synj2bp|chr12|-|SE|81510828|81510965|81504250|81504639|81532715|81532880	0.09	ENSMUSG00000090935|Synj2bp|chr12|-|SE|81510828|81510965|81504250|81504639|81532715|81532880|POS
ENSMUSG00000026159|Agfg1|chr1|+|SE|82886374|82886467|82886110|82886187|82893423|82893582	0.09	ENSMUSG00000026159|Agfg1|chr1|+|SE|82886374|82886467|82886110|82886187|82893423|82893582|POS
ENSMUSG00000034908|Sidt2|chr9|-|SE|45946505|45946568|45945665|45945784|45946744|45946816	0.091	ENSMUSG00000034908|Sidt2|chr9|-|SE|45946505|45946568|45945665|45945784|45946744|45946816|POS
ENSMUSG00000042520|Ubap2l|chr3|-|SE|90031295|90031370|90028324|90028377|90034064|90034177	0.092	ENSMUSG00000042520|Ubap2l|chr3|-|SE|90031295|90031370|90028324|90028377|90034064|90034177|POS
ENSMUSG00000028479|Gne|chr4|-|SE|44063086|44063146|44059971|44060227|44066754|44066960	0.093	ENSMUSG00000028479|Gne|chr4|-|SE|44063086|44063146|44059971|44060227|44066754|44066960|POS
ENSMUSG00000039298|Cdk5rap2|chr4|-|SE|70246947|70246974|70245380|70245497|70250352|70250472	0.095	ENSMUSG00000039298|Cdk5rap2|chr4|-|SE|70246947|70246974|70245380|70245497|70250352|70250472|POS
ENSMUSG00000066406|Akap13|chr7|+|SE|75679819|75679873|75677105|75677479|75685116|75685309	0.095	ENSMUSG00000066406|Akap13|chr7|+|SE|75679819|75679873|75677105|75677479|75685116|75685309|POS
ENSMUSG00000027651|Rprd1b|chr2|+|SE|158070560|158070656|158058651|158058827|158074929|158075067	0.097	ENSMUSG00000027651|Rprd1b|chr2|+|SE|158070560|158070656|158058651|158058827|158074929|158075067|POS
ENSMUSG00000020831|0610010K14Rik|chr11|-|SE|70236887|70236978|70236023|70236211|70237530|70237625	0.1	ENSMUSG00000020831|0610010K14Rik|chr11|-|SE|70236887|70236978|70236023|70236211|70237530|70237625|POS
ENSMUSG00000033075|Senp1|chr15|-|SE|98076911|98077042|98076549|98076709|98082242|98082327	0.101	ENSMUSG00000033075|Senp1|chr15|-|SE|98076911|98077042|98076549|98076709|98082242|98082327|POS
ENSMUSG00000034255|Arhgap27|chr11|-|RI|103338306|103338755|103338306|103338397|103338687|103338755	0.102	ENSMUSG00000034255|Arhgap27|chr11|-|RI|103338306|103338755|103338306|103338397|103338687|103338755|POS
ENSMUSG00000021171|Esyt2|chr12|+|SE|116353826|116353889|116348218|116348314|116357111|116357186	0.104	ENSMUSG00000021171|Esyt2|chr12|+|SE|116353826|116353889|116348218|116348314|116357111|116357186|POS
ENSMUSG00000020166|Cnot2|chr10|-|SE|116537220|116537448|116527826|116527949|116549032|116549105	0.105	ENSMUSG00000020166|Cnot2|chr10|-|SE|116537220|116537448|116527826|116527949|116549032|116549105|POS
ENSMUSG00000029687|Ezh2|chr6|-|SE|47541844|47541970|47540676|47540855|47542365|47542406	0.106	ENSMUSG00000029687|Ezh2|chr6|-|SE|47541844|47541970|47540676|47540855|47542365|47542406|POS
ENSMUSG00000029810|Tmem176b|chr6|-|SE|48840360|48840453|48838171|48838365|48840995|48841078	0.106	ENSMUSG00000029810|Tmem176b|chr6|-|SE|48840360|48840453|48838171|48838365|48840995|48841078|POS
ENSMUSG00000037808|Fam76b|chr9|+|SE|13836658|13836716|13836102|13836183|13836836|13836972	0.108	ENSMUSG00000037808|Fam76b|chr9|+|SE|13836658|13836716|13836102|13836183|13836836|13836972|POS
ENSMUSG00000040242|Fgfr1op2|chr6|+|SE|146592633|146592747|146589893|146590036|146595175|146595289	0.109	ENSMUSG00000040242|Fgfr1op2|chr6|+|SE|146592633|146592747|146589893|146590036|146595175|146595289|POS
ENSMUSG00000026219|Trip12|chr1|-|SE|84795689|84795815|84793524|84794327|84814822|84814969	0.109	ENSMUSG00000026219|Trip12|chr1|-|SE|84795689|84795815|84793524|84794327|84814822|84814969|POS
ENSMUSG00000025236|Adpgk|chr9|+|RI|59310227|59313236|59310227|59310348|59313039|59313236	0.109	ENSMUSG00000025236|Adpgk|chr9|+|RI|59310227|59313236|59310227|59310348|59313039|59313236|POS
ENSMUSG00000058486|Wdr91|chr6|-|SE|34909676|34909827|34909360|34909540|34910696|34910836	0.11	ENSMUSG00000058486|Wdr91|chr6|-|SE|34909676|34909827|34909360|34909540|34910696|34910836|POS
ENSMUSG00000042133|Ppig|chr2|+|SE|69731490|69731580|69722902|69722957|69731745|69731813	0.11	ENSMUSG00000042133|Ppig|chr2|+|SE|69731490|69731580|69722902|69722957|69731745|69731813|POS
ENSMUSG00000002524|Puf60|chr15|-|SE|76074606|76074657|76072406|76072568|76075541|76075631	0.112	ENSMUSG00000002524|Puf60|chr15|-|SE|76074606|76074657|76072406|76072568|76075541|76075631|POS
ENSMUSG00000025227|Mfsd13a|chr19|+|SE|46371935|46372107|46369236|46369333|46372181|46372375	0.113	ENSMUSG00000025227|Mfsd13a|chr19|+|SE|46371935|46372107|46369236|46369333|46372181|46372375|POS
ENSMUSG00000035325|Sec31a|chr5|-|SE|100389067|100389106|100386127|100386203|100390758|100390833	0.114	ENSMUSG00000035325|Sec31a|chr5|-|SE|100389067|100389106|100386127|100386203|100390758|100390833|POS
ENSMUSG00000029328|Hnrnpdl|chr5|-|SE|100035634|100035739|100034726|100034984|100036103|100036195	0.115	ENSMUSG00000029328|Hnrnpdl|chr5|-|SE|100035634|100035739|100034726|100034984|100036103|100036195|POS
ENSMUSG00000031310|Zmym3|chrX|-|SE|101416166|101416461|101414928|101415938|101416908|101416975	0.115	ENSMUSG00000031310|Zmym3|chrX|-|SE|101416166|101416461|101414928|101415938|101416908|101416975|POS
ENSMUSG00000067367|Lyar|chr5|+|SE|38223133|38223231|38220481|38220635|38224626|38224797	0.116	ENSMUSG00000067367|Lyar|chr5|+|SE|38223133|38223231|38220481|38220635|38224626|38224797|POS
ENSMUSG00000032185|Carm1|chr9|+|SE|21587850|21587919|21587507|21587585|21588048|21588200	0.117	ENSMUSG00000032185|Carm1|chr9|+|SE|21587850|21587919|21587507|21587585|21588048|21588200|POS
ENSMUSG00000026790|Odf2|chr2|+|SE|29893000|29893154|29892185|29892276|29893443|29893512	0.117	ENSMUSG00000026790|Odf2|chr2|+|SE|29893000|29893154|29892185|29892276|29893443|29893512|POS
ENSMUSG00000027763|Mbnl1|chr3|+|SE|60528755|60529804|60473041|60473173|60595593|60595764	0.118	ENSMUSG00000027763|Mbnl1|chr3|+|SE|60528755|60529804|60473041|60473173|60595593|60595764|POS
ENSMUSG00000021000|Mia2|chr12|+|SE|59146335|59146362|59144698|59144770|59146846|59146872	0.119	ENSMUSG00000021000|Mia2|chr12|+|SE|59146335|59146362|59144698|59144770|59146846|59146872|POS
ENSMUSG00000032407|U2surp|chr9|-|SE|95500687|95500819|95495834|95495933|95502539|95502584	0.12	ENSMUSG00000032407|U2surp|chr9|-|SE|95500687|95500819|95495834|95495933|95502539|95502584|POS
ENSMUSG00000005936|Kctd20|chr17|+|SE|28957878|28958057|28952257|28952569|28961413|28961537	0.121	ENSMUSG00000005936|Kctd20|chr17|+|SE|28957878|28958057|28952257|28952569|28961413|28961537|POS
ENSMUSG00000031153|Gripap1|chrX|+|SE|7800535|7800583|7800156|7800341|7801176|7801208	0.122	ENSMUSG00000031153|Gripap1|chrX|+|SE|7800535|7800583|7800156|7800341|7801176|7801208|POS
ENSMUSG00000053158|Fes|chr7|-|A3SS|80382312|80382431|80382312|80382396|80382520|80382707	0.122	ENSMUSG00000053158|Fes|chr7|-|A3SS|80382312|80382431|80382312|80382396|80382520|80382707|POS
ENSMUSG00000019843|Fyn|chr10|+|MXE|39529436|39529601|39529918|39530074|39526780|39526930|39532015|39532195	0.122	ENSMUSG00000019843|Fyn|chr10|+|MXE|39529436|39529601|39529918|39530074|39526780|39526930|39532015|39532195|POS
ENSMUSG00000012114|Med15|chr16|-|SE|17663376|17663496|17655677|17655805|17671544|17671673	0.127	ENSMUSG00000012114|Med15|chr16|-|SE|17663376|17663496|17655677|17655805|17671544|17671673|POS
ENSMUSG00000022779|Top3b|chr16|+|SE|16875071|16875155|16870786|16871055|16877831|16878016	0.128	ENSMUSG00000022779|Top3b|chr16|+|SE|16875071|16875155|16870786|16871055|16877831|16878016|POS
ENSMUSG00000042323|Pbrm1|chr14|+|MXE|31110414|31110579|31113848|31114004|31107108|31107310|31117012|31117083	0.129	ENSMUSG00000042323|Pbrm1|chr14|+|MXE|31110414|31110579|31113848|31114004|31107108|31107310|31117012|31117083|POS
ENSMUSG00000046032|Snx12|chrX|-|RI|101211958|101213864|101211958|101212346|101213773|101213864	0.129	ENSMUSG00000046032|Snx12|chrX|-|RI|101211958|101213864|101211958|101212346|101213773|101213864|POS
ENSMUSG00000029068|Ccnl2|chr4|+|SE|155818538|155818664|155817922|155817987|155820328|155820428	0.13	ENSMUSG00000029068|Ccnl2|chr4|+|SE|155818538|155818664|155817922|155817987|155820328|155820428|POS
ENSMUSG00000017478|Zc3h18|chr8|+|SE|122387692|122387764|122386861|122386946|122397817|122397966	0.13	ENSMUSG00000017478|Zc3h18|chr8|+|SE|122387692|122387764|122386861|122386946|122397817|122397966|POS
ENSMUSG00000020124|Usp15|chr10|-|SE|123153040|123153127|123146793|123146938|123163592|123163654	0.131	ENSMUSG00000020124|Usp15|chr10|-|SE|123153040|123153127|123146793|123146938|123163592|123163654|POS
ENSMUSG00000023971|Rrp36|chr17|-|SE|46672335|46672440|46670110|46670185|46672524|46672591	0.132	ENSMUSG00000023971|Rrp36|chr17|-|SE|46672335|46672440|46670110|46670185|46672524|46672591|POS
ENSMUSG00000045411|2410002F23Rik|chr7|+|A3SS|44247237|44247416|44247250|44247416|44246786|44246823	0.134	ENSMUSG00000045411|2410002F23Rik|chr7|+|A3SS|44247237|44247416|44247250|44247416|44246786|44246823|POS
ENSMUSG00000022983|Scaf4|chr16|-|RI|90242526|90242958|90242526|90242718|90242871|90242958	0.136	ENSMUSG00000022983|Scaf4|chr16|-|RI|90242526|90242958|90242526|90242718|90242871|90242958|POS
ENSMUSG00000034327|Kctd9|chr14|+|A3SS|67729223|67729409|67729350|67729409|67728649|67728746	0.136	ENSMUSG00000034327|Kctd9|chr14|+|A3SS|67729223|67729409|67729350|67729409|67728649|67728746|POS
ENSMUSG00000024613|Tcof1|chr18|-|SE|60827339|60827447|60822803|60822990|60828364|60828559	0.137	ENSMUSG00000024613|Tcof1|chr18|-|SE|60827339|60827447|60822803|60822990|60828364|60828559|POS
ENSMUSG00000022422|Dscc1|chr15|-|SE|55083404|55083593|55083045|55083098|55084048|55084187	0.14	ENSMUSG00000022422|Dscc1|chr15|-|SE|55083404|55083593|55083045|55083098|55084048|55084187|POS
ENSMUSG00000027523|Gnas|chr2|+|SE|174336746|174336791|174334211|174334284|174341652|174341707	0.14	ENSMUSG00000027523|Gnas|chr2|+|SE|174336746|174336791|174334211|174334284|174341652|174341707|POS
ENSMUSG00000027680|Fxr1|chr3|+|SE|34068160|34068252|34064118|34064319|34068916|34069342	0.142	ENSMUSG00000027680|Fxr1|chr3|+|SE|34068160|34068252|34064118|34064319|34068916|34069342|POS
ENSMUSG00000042625|Safb2|chr17|-|RI|56562938|56563431|56562938|56563243|56563361|56563431	0.144	ENSMUSG00000042625|Safb2|chr17|-|RI|56562938|56563431|56562938|56563243|56563361|56563431|POS
ENSMUSG00000022779|Top3b|chr16|+|SE|16875071|16875155|16870756|16870829|16877831|16878016	0.145	ENSMUSG00000022779|Top3b|chr16|+|SE|16875071|16875155|16870756|16870829|16877831|16878016|POS
ENSMUSG00000042210|Abhd14a|chr9|-|A5SS|106443805|106443942|106443826|106443942|106440620|106440856	0.145	ENSMUSG00000042210|Abhd14a|chr9|-|A5SS|106443805|106443942|106443826|106443942|106440620|106440856|POS
ENSMUSG00000020166|Cnot2|chr10|-|SE|116537220|116537278|116527826|116527949|116549032|116549175	0.146	ENSMUSG00000020166|Cnot2|chr10|-|SE|116537220|116537278|116527826|116527949|116549032|116549175|POS
ENSMUSG00000026289|Atg16l1|chr1|+|RI|87785875|87786346|87785875|87785996|87786240|87786346	0.147	ENSMUSG00000026289|Atg16l1|chr1|+|RI|87785875|87786346|87785875|87785996|87786240|87786346|POS
ENSMUSG00000045349|Sh2d5|chr4|+|SE|138253611|138253689|138250422|138250508|138253830|138253958	0.147	ENSMUSG00000045349|Sh2d5|chr4|+|SE|138253611|138253689|138250422|138250508|138253830|138253958|POS
ENSMUSG00000026790|Odf2|chr2|+|SE|29893037|29893154|29892185|29892276|29893443|29893512	0.152	ENSMUSG00000026790|Odf2|chr2|+|SE|29893037|29893154|29892185|29892276|29893443|29893512|POS
ENSMUSG00000059273|Zc3h4|chr7|+|SE|16432773|16433022|16429530|16429910|16434020|16437695	0.152	ENSMUSG00000059273|Zc3h4|chr7|+|SE|16432773|16433022|16429530|16429910|16434020|16437695|POS
ENSMUSG00000049550|Clip1|chr5|-|SE|123635173|123635278|123630224|123631169|123640493|123640554	0.152	ENSMUSG00000049550|Clip1|chr5|-|SE|123635173|123635278|123630224|123631169|123640493|123640554|POS
ENSMUSG00000020076|Ddx50|chr10|-|SE|62647533|62647643|62645990|62647201|62651024|62651203	0.152	ENSMUSG00000020076|Ddx50|chr10|-|SE|62647533|62647643|62645990|62647201|62651024|62651203|POS
ENSMUSG00000030704|Rab6a|chr7|+|MXE|100629665|100629771|100629837|100629943|100628403|100628457|100631741|100631853	0.157	ENSMUSG00000030704|Rab6a|chr7|+|MXE|100629665|100629771|100629837|100629943|100628403|100628457|100631741|100631853|POS
ENSMUSG00000056724|Nbeal2|chr9|-|SE|110641410|110641491|110639779|110639863|110641770|110641877	0.159	ENSMUSG00000056724|Nbeal2|chr9|-|SE|110641410|110641491|110639779|110639863|110641770|110641877|POS
ENSMUSG00000022779|Top3b|chr16|+|SE|16875068|16875155|16870773|16870829|16877831|16878016	0.16	ENSMUSG00000022779|Top3b|chr16|+|SE|16875068|16875155|16870773|16870829|16877831|16878016|POS
ENSMUSG00000021843|Ktn1|chr14|+|SE|47725928|47726000|47724877|47724970|47726225|47726309	0.164	ENSMUSG00000021843|Ktn1|chr14|+|SE|47725928|47726000|47724877|47724970|47726225|47726309|POS
ENSMUSG00000022553|Maf1|chr15|+|SE|76351995|76352041|76351293|76351659|76352419|76352552	0.164	ENSMUSG00000022553|Maf1|chr15|+|SE|76351995|76352041|76351293|76351659|76352419|76352552|POS
ENSMUSG00000032407|U2surp|chr9|-|SE|95500687|95500873|95495834|95495933|95502539|95502584	0.164	ENSMUSG00000032407|U2surp|chr9|-|SE|95500687|95500873|95495834|95495933|95502539|95502584|POS
ENSMUSG00000029208|Guf1|chr5|+|RI|69567127|69568497|69567127|69567261|69568395|69568497	0.164	ENSMUSG00000029208|Guf1|chr5|+|RI|69567127|69568497|69567127|69567261|69568395|69568497|POS
ENSMUSG00000040462|Os9|chr10|-|SE|127096914|127097079|127096629|127096742|127097931|127098121	0.166	ENSMUSG00000040462|Os9|chr10|-|SE|127096914|127097079|127096629|127096742|127097931|127098121|POS
ENSMUSG00000002885|Adgre5|chr8|-|SE|83730110|83730257|83729381|83729525|83733413|83733566	0.173	ENSMUSG00000002885|Adgre5|chr8|-|SE|83730110|83730257|83729381|83729525|83733413|83733566|POS
ENSMUSG00000005078|Jkamp|chr12|+|A3SS|72089314|72089406|72089332|72089406|72085856|72086183	0.173	ENSMUSG00000005078|Jkamp|chr12|+|A3SS|72089314|72089406|72089332|72089406|72085856|72086183|POS
ENSMUSG00000020107|Anapc16|chr10|-|SE|60002417|60002467|59996447|59996614|60002955|60002995	0.173	ENSMUSG00000020107|Anapc16|chr10|-|SE|60002417|60002467|59996447|59996614|60002955|60002995|POS
ENSMUSG00000035621|Midn|chr10|+|SE|80153590|80153719|80151660|80151723|80153815|80153868	0.175	ENSMUSG00000035621|Midn|chr10|+|SE|80153590|80153719|80151660|80151723|80153815|80153868|POS
ENSMUSG00000021375|Kif13a|chr13|-|SE|46760662|46760767|46752080|46752872|46761272|46761424	0.177	ENSMUSG00000021375|Kif13a|chr13|-|SE|46760662|46760767|46752080|46752872|46761272|46761424|POS
ENSMUSG00000036860|Mrpl55|chr11|+|A3SS|59204534|59204757|59204555|59204757|59204171|59204255	0.178	ENSMUSG00000036860|Mrpl55|chr11|+|A3SS|59204534|59204757|59204555|59204757|59204171|59204255|POS
ENSMUSG00000029068|Ccnl2|chr4|+|RI|155817922|155820428|155817922|155817987|155820328|155820428	0.188	ENSMUSG00000029068|Ccnl2|chr4|+|RI|155817922|155820428|155817922|155817987|155820328|155820428|POS
ENSMUSG00000017686|Rhot1|chr11|+|SE|80257513|80257636|80254659|80254862|80265741|80266738	0.189	ENSMUSG00000017686|Rhot1|chr11|+|SE|80257513|80257636|80254659|80254862|80265741|80266738|POS
ENSMUSG00000042323|Pbrm1|chr14|+|SE|31110414|31110579|31107108|31107310|31113848|31114004	0.191	ENSMUSG00000042323|Pbrm1|chr14|+|SE|31110414|31110579|31107108|31107310|31113848|31114004|POS
ENSMUSG00000031608|Galnt7|chr8|-|MXE|57542511|57542694|57542834|57543017|57540019|57540137|57545328|57545408	0.193	ENSMUSG00000031608|Galnt7|chr8|-|MXE|57542511|57542694|57542834|57543017|57540019|57540137|57545328|57545408|POS
ENSMUSG00000042323|Pbrm1|chr14|+|SE|31056235|31056280|31054157|31054255|31061468|31061745	0.194	ENSMUSG00000042323|Pbrm1|chr14|+|SE|31056235|31056280|31054157|31054255|31061468|31061745|POS
ENSMUSG00000022884|Eif4a2|chr16|+|SE|23112350|23112457|23111816|23111896|23113166|23113184	0.195	ENSMUSG00000022884|Eif4a2|chr16|+|SE|23112350|23112457|23111816|23111896|23113166|23113184|POS
ENSMUSG00000029767|Calu|chr6|+|MXE|29361293|29361487|29361559|29361753|29356470|29356697|29366039|29366206	0.197	ENSMUSG00000029767|Calu|chr6|+|MXE|29361293|29361487|29361559|29361753|29356470|29356697|29366039|29366206|POS
ENSMUSG00000032803|Cdv3|chr9|-|A3SS|103353103|103356029|103353103|103355313|103356279|103356439	0.199	ENSMUSG00000032803|Cdv3|chr9|-|A3SS|103353103|103356029|103353103|103355313|103356279|103356439|POS
ENSMUSG00000058835|Abi1|chr2|-|SE|22953434|22953608|22946575|22946761|22957017|22957118	0.2	ENSMUSG00000058835|Abi1|chr2|-|SE|22953434|22953608|22946575|22946761|22957017|22957118|POS
ENSMUSG00000034252|Senp6|chr9|+|SE|80098885|80098906|80093536|80093641|80103693|80103764	0.2	ENSMUSG00000034252|Senp6|chr9|+|SE|80098885|80098906|80093536|80093641|80103693|80103764|POS
ENSMUSG00000029767|Calu|chr6|+|SE|29361293|29361487|29356470|29356697|29361559|29361753	0.2	ENSMUSG00000029767|Calu|chr6|+|SE|29361293|29361487|29356470|29356697|29361559|29361753|POS
ENSMUSG00000029068|Ccnl2|chr4|+|A3SS|155818538|155820428|155820328|155820428|155817922|155817987	0.2	ENSMUSG00000029068|Ccnl2|chr4|+|A3SS|155818538|155820428|155820328|155820428|155817922|155817987|POS
ENSMUSG00000019916|P4ha1|chr10|+|MXE|59354339|59354410|59355349|59355420|59352082|59352259|59361860|59361960	0.203	ENSMUSG00000019916|P4ha1|chr10|+|MXE|59354339|59354410|59355349|59355420|59352082|59352259|59361860|59361960|POS
ENSMUSG00000058835|Abi1|chr2|-|SE|22953434|22953611|22946575|22946761|22957017|22957118	0.203	ENSMUSG00000058835|Abi1|chr2|-|SE|22953434|22953611|22946575|22946761|22957017|22957118|POS
ENSMUSG00000030733|Sh2b1|chr7|-|SE|126469487|126469570|126469124|126469328|126471121|126471297	0.204	ENSMUSG00000030733|Sh2b1|chr7|-|SE|126469487|126469570|126469124|126469328|126471121|126471297|POS
ENSMUSG00000032525|Nktr|chr9|+|SE|121738387|121738415|121731477|121731565|121741121|121741151	0.206	ENSMUSG00000032525|Nktr|chr9|+|SE|121738387|121738415|121731477|121731565|121741121|121741151|POS
ENSMUSG00000042133|Ppig|chr2|+|SE|69731490|69731580|69723325|69723363|69731745|69731813	0.211	ENSMUSG00000042133|Ppig|chr2|+|SE|69731490|69731580|69723325|69723363|69731745|69731813|POS
ENSMUSG00000022139|Mbnl2|chr14|+|SE|120404637|120404732|120396450|120396604|120428934|120429626	0.218	ENSMUSG00000022139|Mbnl2|chr14|+|SE|120404637|120404732|120396450|120396604|120428934|120429626|POS
ENSMUSG00000031570|Plpp5|chr8|+|RI|25721661|25722600|25721661|25721786|25722429|25722600	0.221	ENSMUSG00000031570|Plpp5|chr8|+|RI|25721661|25722600|25721661|25721786|25722429|25722600|POS
ENSMUSG00000046567|4930430F08Rik|chr10|-|SE|100582262|100582322|100577445|100578431|100583913|100584009	0.226	ENSMUSG00000046567|4930430F08Rik|chr10|-|SE|100582262|100582322|100577445|100578431|100583913|100584009|POS
ENSMUSG00000017210|Med24|chr11|-|SE|98717708|98717765|98716413|98716525|98717909|98718142	0.23	ENSMUSG00000017210|Med24|chr11|-|SE|98717708|98717765|98716413|98716525|98717909|98718142|POS
ENSMUSG00000038346|Zfp384|chr6|+|SE|125026256|125026319|125025847|125025940|125030797|125032783	0.235	ENSMUSG00000038346|Zfp384|chr6|+|SE|125026256|125026319|125025847|125025940|125030797|125032783|POS
ENSMUSG00000024188|Luc7l|chr17|+|SE|26253973|26254044|26252998|26253091|26255030|26255125	0.238	ENSMUSG00000024188|Luc7l|chr17|+|SE|26253973|26254044|26252998|26253091|26255030|26255125|POS
ENSMUSG00000043987|Cep164|chr9|-|SE|45826725|45826808|45823645|45823764|45828501|45828639	0.241	ENSMUSG00000043987|Cep164|chr9|-|SE|45826725|45826808|45823645|45823764|45828501|45828639|POS
ENSMUSG00000025437|Usp33|chr3|+|A3SS|152374890|152374985|152374914|152374985|152374619|152374789	0.241	ENSMUSG00000025437|Usp33|chr3|+|A3SS|152374890|152374985|152374914|152374985|152374619|152374789|POS
ENSMUSG00000039361|Picalm|chr7|+|A3SS|90191140|90191272|90191155|90191272|90189149|90189257	0.25	ENSMUSG00000039361|Picalm|chr7|+|A3SS|90191140|90191272|90191155|90191272|90189149|90189257|POS
ENSMUSG00000031592|Pcm1|chr8|+|SE|41261359|41261476|41261010|41261181|41267186|41267364	0.252	ENSMUSG00000031592|Pcm1|chr8|+|SE|41261359|41261476|41261010|41261181|41267186|41267364|POS
ENSMUSG00000017686|Rhot1|chr11|+|SE|80257513|80257636|80255861|80255957|80265741|80266738	0.259	ENSMUSG00000017686|Rhot1|chr11|+|SE|80257513|80257636|80255861|80255957|80265741|80266738|POS
ENSMUSG00000037270|4932438A13Rik|chr3|+|SE|37022969|37023032|37022383|37022474|37026089|37026343	0.262	ENSMUSG00000037270|4932438A13Rik|chr3|+|SE|37022969|37023032|37022383|37022474|37026089|37026343|POS
ENSMUSG00000021133|Susd6|chr12|+|SE|80851213|80851276|80828025|80828243|80868426|80868624	0.264	ENSMUSG00000021133|Susd6|chr12|+|SE|80851213|80851276|80828025|80828243|80868426|80868624|POS
ENSMUSG00000032067|Pts|chr9|-|SE|50528023|50528232|50526869|50526949|50528556|50528638	0.267	ENSMUSG00000032067|Pts|chr9|-|SE|50528023|50528232|50526869|50526949|50528556|50528638|POS
ENSMUSG00000018599|Mief2|chr11|+|RI|60730282|60730792|60730282|60730435|60730629|60730792	0.281	ENSMUSG00000018599|Mief2|chr11|+|RI|60730282|60730792|60730282|60730435|60730629|60730792|POS
ENSMUSG00000042210|Abhd14a|chr9|-|A3SS|106440620|106440910|106440620|106440856|106443826|106443942	0.303	ENSMUSG00000042210|Abhd14a|chr9|-|A3SS|106440620|106440910|106440620|106440856|106443826|106443942|POS
ENSMUSG00000036916|Zfp280c|chrX|-|A3SS|48578379|48578556|48578379|48578529|48588702|48588749	0.32	ENSMUSG00000036916|Zfp280c|chrX|-|A3SS|48578379|48578556|48578379|48578529|48588702|48588749|POS
ENSMUSG00000021843|Ktn1|chr14|+|SE|47704419|47704488|47704186|47704277|47705762|47705800	0.322	ENSMUSG00000021843|Ktn1|chr14|+|SE|47704419|47704488|47704186|47704277|47705762|47705800|POS
ENSMUSG00000034206|Polq|chr16|+|SE|37016312|37016408|37015078|37015209|37017198|37017355	0.326	ENSMUSG00000034206|Polq|chr16|+|SE|37016312|37016408|37015078|37015209|37017198|37017355|POS
ENSMUSG00000049916|2610318N02Rik|chr16|-|SE|17123511|17123654|17121225|17121551|17124989|17125106	0.326	ENSMUSG00000049916|2610318N02Rik|chr16|-|SE|17123511|17123654|17121225|17121551|17124989|17125106|POS
ENSMUSG00000042790|Rnf214|chr9|-|SE|45866946|45867051|45866565|45866661|45867499|45867632	0.332	ENSMUSG00000042790|Rnf214|chr9|-|SE|45866946|45867051|45866565|45866661|45867499|45867632|POS
ENSMUSG00000032067|Pts|chr9|-|SE|50528145|50528232|50526869|50526949|50528556|50528640	0.44	ENSMUSG00000032067|Pts|chr9|-|SE|50528145|50528232|50526869|50526949|50528556|50528640|POS
ENSMUSG00000029422|Rsrc2|chr5|-|SE|123746771|123746870|123745496|123745589|123749288|123749367	0.465	ENSMUSG00000029422|Rsrc2|chr5|-|SE|123746771|123746870|123745496|123745589|123749288|123749367|POS

## Sheet: KL_S34F_DSE
Event_ID	delta_PSI	Event_ID_withdir
ENSMUSG00000086629|2810403D21Rik|chrX|+|SE|108871471|108871598|108836228|108836355|108901463|108901555	-0.532	ENSMUSG00000086629|2810403D21Rik|chrX|+|SE|108871471|108871598|108836228|108836355|108901463|108901555|NEG
ENSMUSG00000024969|Mark2|chr19|-|SE|7279985|7280012|7279110|7279278|7280997|7281255	-0.499	ENSMUSG00000024969|Mark2|chr19|-|SE|7279985|7280012|7279110|7279278|7280997|7281255|NEG
ENSMUSG00000031860|Pbx4|chr8|+|SE|69864311|69864550|69859079|69859153|69864823|69865014	-0.399	ENSMUSG00000031860|Pbx4|chr8|+|SE|69864311|69864550|69859079|69859153|69864823|69865014|NEG
ENSMUSG00000022119|Rbm26|chr14|-|SE|105139090|105139162|105131881|105132007|105140315|105140438	-0.395	ENSMUSG00000022119|Rbm26|chr14|-|SE|105139090|105139162|105131881|105132007|105140315|105140438|NEG
ENSMUSG00000026049|Tex30|chr1|-|SE|44101899|44101957|44099847|44099935|44102327|44102391	-0.393	ENSMUSG00000026049|Tex30|chr1|-|SE|44101899|44101957|44099847|44099935|44102327|44102391|NEG
ENSMUSG00000030231|Plekha5|chr6|+|A3SS|140593554|140597110|140596248|140597110|140591627|140591764	-0.37	ENSMUSG00000030231|Plekha5|chr6|+|A3SS|140593554|140597110|140596248|140597110|140591627|140591764|NEG
ENSMUSG00000042302|Ehbp1|chr11|-|A3SS|22146462|22146700|22146462|22146625|22151066|22151189	-0.363	ENSMUSG00000042302|Ehbp1|chr11|-|A3SS|22146462|22146700|22146462|22146625|22151066|22151189|NEG
ENSMUSG00000054099|Slc25a40|chr5|+|SE|8424796|8424887|8422872|8423039|8427195|8427267	-0.363	ENSMUSG00000054099|Slc25a40|chr5|+|SE|8424796|8424887|8422872|8423039|8427195|8427267|NEG
ENSMUSG00000102976|Zc3h11a|chr1|-|SE|133655344|133655398|133653972|133654032|133661236|133661318	-0.358	ENSMUSG00000102976|Zc3h11a|chr1|-|SE|133655344|133655398|133653972|133654032|133661236|133661318|NEG
ENSMUSG00000026656|Fcgr2b|chr1|-|SE|170963324|170963465|170961195|170961233|170965701|170965824	-0.357	ENSMUSG00000026656|Fcgr2b|chr1|-|SE|170963324|170963465|170961195|170961233|170965701|170965824|NEG
ENSMUSG00000052446|Zfp961|chr8|+|SE|71966099|71966160|71965793|71965920|71967898|71968053	-0.342	ENSMUSG00000052446|Zfp961|chr8|+|SE|71966099|71966160|71965793|71965920|71967898|71968053|NEG
ENSMUSG00000063179|Pstk|chr7|+|SE|131373535|131373830|131371140|131371389|131374064|131374263	-0.334	ENSMUSG00000063179|Pstk|chr7|+|SE|131373535|131373830|131371140|131371389|131374064|131374263|NEG
ENSMUSG00000030231|Plekha5|chr6|+|SE|140593554|140593657|140591627|140591764|140596248|140597110	-0.332	ENSMUSG00000030231|Plekha5|chr6|+|SE|140593554|140593657|140591627|140591764|140596248|140597110|NEG
ENSMUSG00000021271|Zfp839|chr12|+|SE|110860795|110861023|110854999|110855872|110863963|110864056	-0.328	ENSMUSG00000021271|Zfp839|chr12|+|SE|110860795|110861023|110854999|110855872|110863963|110864056|NEG
ENSMUSG00000006154|Eps8l1|chr7|+|SE|4462285|4462400|4460673|4461024|4465358|4465412	-0.321	ENSMUSG00000006154|Eps8l1|chr7|+|SE|4462285|4462400|4460673|4461024|4465358|4465412|NEG
ENSMUSG00000047030|Spata2|chr2|-|SE|167486431|167486492|167485354|167485593|167489168|167489368	-0.319	ENSMUSG00000047030|Spata2|chr2|-|SE|167486431|167486492|167485354|167485593|167489168|167489368|NEG
ENSMUSG00000010608|Rbm25|chr12|+|SE|83642401|83642519|83639127|83639191|83642628|83642698	-0.312	ENSMUSG00000010608|Rbm25|chr12|+|SE|83642401|83642519|83639127|83639191|83642628|83642698|NEG
ENSMUSG00000021870|Slmap|chr14|-|SE|26453537|26453600|26442574|26442634|26459903|26459954	-0.301	ENSMUSG00000021870|Slmap|chr14|-|SE|26453537|26453600|26442574|26442634|26459903|26459954|NEG
ENSMUSG00000021112|Mpp5|chr12|+|A3SS|78796865|78797390|78797102|78797390|78794244|78794333	-0.296	ENSMUSG00000021112|Mpp5|chr12|+|A3SS|78796865|78797390|78797102|78797390|78794244|78794333|NEG
ENSMUSG00000026656|Fcgr2b|chr1|-|SE|170963408|170963465|170961195|170961233|170965701|170965824	-0.295	ENSMUSG00000026656|Fcgr2b|chr1|-|SE|170963408|170963465|170961195|170961233|170965701|170965824|NEG
ENSMUSG00000061371|Zfp873|chr10|+|SE|82058682|82058743|82058369|82058496|82059516|82061581	-0.287	ENSMUSG00000061371|Zfp873|chr10|+|SE|82058682|82058743|82058369|82058496|82059516|82061581|NEG
ENSMUSG00000073125|Xlr3b|chrX|+|RI|73197352|73198385|73197352|73197470|73198285|73198385	-0.283	ENSMUSG00000073125|Xlr3b|chrX|+|RI|73197352|73198385|73197352|73197470|73198285|73198385|NEG
ENSMUSG00000003299|Mrpl4|chr9|+|A3SS|21007327|21007540|21007363|21007540|21006826|21006944	-0.281	ENSMUSG00000003299|Mrpl4|chr9|+|A3SS|21007327|21007540|21007363|21007540|21006826|21006944|NEG
ENSMUSG00000056476|Med12l|chr3|+|SE|59039165|59039198|59037559|59037751|59042253|59042413	-0.28	ENSMUSG00000056476|Med12l|chr3|+|SE|59039165|59039198|59037559|59037751|59042253|59042413|NEG
ENSMUSG00000064215|Ifi27|chr12|+|SE|103437389|103437524|103436562|103436682|103439400|103439562	-0.277	ENSMUSG00000064215|Ifi27|chr12|+|SE|103437389|103437524|103436562|103436682|103439400|103439562|NEG
ENSMUSG00000041977|Arhgef11|chr3|+|SE|87718228|87718258|87717420|87717520|87722356|87722483	-0.277	ENSMUSG00000041977|Arhgef11|chr3|+|SE|87718228|87718258|87717420|87717520|87722356|87722483|NEG
ENSMUSG00000051682|Treml4|chr17|+|A3SS|48269684|48269766|48269708|48269766|48269385|48269436	-0.277	ENSMUSG00000051682|Treml4|chr17|+|A3SS|48269684|48269766|48269708|48269766|48269385|48269436|NEG
ENSMUSG00000015659|Serac1|chr17|-|SE|6069298|6069388|6067528|6067660|6070752|6070889	-0.275	ENSMUSG00000015659|Serac1|chr17|-|SE|6069298|6069388|6067528|6067660|6070752|6070889|NEG
ENSMUSG00000034764|1700006J14Rik|chr10|+|SE|120371256|120371304|120369874|120370024|120382064|120384336	-0.271	ENSMUSG00000034764|1700006J14Rik|chr10|+|SE|120371256|120371304|120369874|120370024|120382064|120384336|NEG
ENSMUSG00000028708|Mknk1|chr4|+|SE|115876580|115876624|115875380|115875545|115877949|115879250	-0.269	ENSMUSG00000028708|Mknk1|chr4|+|SE|115876580|115876624|115875380|115875545|115877949|115879250|NEG
ENSMUSG00000025505|Tmem80|chr7|+|SE|141334010|141334103|141333380|141333731|141335844|141336067	-0.269	ENSMUSG00000025505|Tmem80|chr7|+|SE|141334010|141334103|141333380|141333731|141335844|141336067|NEG
ENSMUSG00000078681|Tm2d3|chr7|+|SE|65693850|65693943|65693061|65693569|65695169|65695327	-0.268	ENSMUSG00000078681|Tm2d3|chr7|+|SE|65693850|65693943|65693061|65693569|65695169|65695327|NEG
ENSMUSG00000021557|Agtpbp1|chr13|-|SE|59531056|59531203|59528386|59528518|59532012|59532076	-0.267	ENSMUSG00000021557|Agtpbp1|chr13|-|SE|59531056|59531203|59528386|59528518|59532012|59532076|NEG
ENSMUSG00000037108|Zcwpw1|chr5|+|SE|137816892|137816976|137812001|137812100|137817457|137817524	-0.264	ENSMUSG00000037108|Zcwpw1|chr5|+|SE|137816892|137816976|137812001|137812100|137817457|137817524|NEG
ENSMUSG00000022749|Tbc1d23|chr16|-|SE|57181491|57181536|57177931|57178020|57182850|57182990	-0.263	ENSMUSG00000022749|Tbc1d23|chr16|-|SE|57181491|57181536|57177931|57178020|57182850|57182990|NEG
ENSMUSG00000061130|Ppm1b|chr17|+|SE|85015408|85015435|85005508|85005566|85023031|85023079	-0.263	ENSMUSG00000061130|Ppm1b|chr17|+|SE|85015408|85015435|85005508|85005566|85023031|85023079|NEG
ENSMUSG00000025059|Gk|chrX|-|SE|85706237|85706324|85701936|85704396|85711050|85711131	-0.255	ENSMUSG00000025059|Gk|chrX|-|SE|85706237|85706324|85701936|85704396|85711050|85711131|NEG
ENSMUSG00000000838|Fmr1|chrX|+|SE|68705860|68705923|68705248|68705380|68708041|68708128	-0.254	ENSMUSG00000000838|Fmr1|chrX|+|SE|68705860|68705923|68705248|68705380|68708041|68708128|NEG
ENSMUSG00000021870|Slmap|chr14|-|SE|26459409|26459460|26442574|26442634|26459903|26459954	-0.251	ENSMUSG00000021870|Slmap|chr14|-|SE|26459409|26459460|26442574|26442634|26459903|26459954|NEG
ENSMUSG00000074867|Zfp808|chr13|+|SE|62169753|62169814|62169441|62169568|62171149|62173419	-0.251	ENSMUSG00000074867|Zfp808|chr13|+|SE|62169753|62169814|62169441|62169568|62171149|62173419|NEG
ENSMUSG00000059897|Zfp930|chr8|+|SE|69226671|69226729|69226342|69226469|69227842|69228980	-0.249	ENSMUSG00000059897|Zfp930|chr8|+|SE|69226671|69226729|69226342|69226469|69227842|69228980|NEG
ENSMUSG00000031389|Arhgap4|chrX|-|SE|73906156|73906219|73905650|73905863|73906428|73906591	-0.249	ENSMUSG00000031389|Arhgap4|chrX|-|SE|73906156|73906219|73905650|73905863|73906428|73906591|NEG
ENSMUSG00000025932|Eya1|chr1|-|SE|14302769|14302897|14283120|14283198|14304424|14304474	-0.247	ENSMUSG00000025932|Eya1|chr1|-|SE|14302769|14302897|14283120|14283198|14304424|14304474|NEG
ENSMUSG00000030929|Eri2|chr7|-|A3SS|119786738|119787485|119786738|119786827|119787733|119787834	-0.247	ENSMUSG00000030929|Eri2|chr7|-|A3SS|119786738|119787485|119786738|119786827|119787733|119787834|NEG
ENSMUSG00000050357|Carmil2|chr8|+|SE|105697560|105697641|105697216|105697438|105697867|105697945	-0.24	ENSMUSG00000050357|Carmil2|chr8|+|SE|105697560|105697641|105697216|105697438|105697867|105697945|NEG
ENSMUSG00000064215|Ifi27|chr12|+|SE|103437389|103437524|103436562|103436682|103437675|103437705	-0.239	ENSMUSG00000064215|Ifi27|chr12|+|SE|103437389|103437524|103436562|103436682|103437675|103437705|NEG
ENSMUSG00000069255|Dusp22|chr13|+|RI|30708676|30711231|30708676|30708749|30710705|30711231	-0.238	ENSMUSG00000069255|Dusp22|chr13|+|RI|30708676|30711231|30708676|30708749|30710705|30711231|NEG
ENSMUSG00000032411|Tfdp2|chr9|+|SE|96290579|96290627|96287600|96287722|96294964|96295127	-0.235	ENSMUSG00000032411|Tfdp2|chr9|+|SE|96290579|96290627|96287600|96287722|96294964|96295127|NEG
ENSMUSG00000063052|Lrrc40|chr3|+|SE|158041585|158041659|158040440|158040622|158043560|158043690	-0.234	ENSMUSG00000063052|Lrrc40|chr3|+|SE|158041585|158041659|158040440|158040622|158043560|158043690|NEG
ENSMUSG00000027281|Slx4ip|chr2|+|SE|137004933|137005054|137000183|137000273|137043999|137044077	-0.234	ENSMUSG00000027281|Slx4ip|chr2|+|SE|137004933|137005054|137000183|137000273|137043999|137044077|NEG
ENSMUSG00000024317|Rnf138|chr18|+|SE|21024408|21024516|21020887|21020999|21026085|21027535	-0.233	ENSMUSG00000024317|Rnf138|chr18|+|SE|21024408|21024516|21020887|21020999|21026085|21027535|NEG
ENSMUSG00000036202|Rif1|chr2|+|SE|52116667|52116745|52116247|52116394|52116834|52116950	-0.232	ENSMUSG00000036202|Rif1|chr2|+|SE|52116667|52116745|52116247|52116394|52116834|52116950|NEG
ENSMUSG00000041975|Mettl8|chr2|-|A3SS|70981854|70982195|70981854|70981967|70993483|70993575	-0.23	ENSMUSG00000041975|Mettl8|chr2|-|A3SS|70981854|70982195|70981854|70981967|70993483|70993575|NEG
ENSMUSG00000002010|Idh3g|chrX|-|SE|73782297|73782309|73782005|73782103|73782674|73782716	-0.229	ENSMUSG00000002010|Idh3g|chrX|-|SE|73782297|73782309|73782005|73782103|73782674|73782716|NEG
ENSMUSG00000068966|Zbtb34|chr2|-|SE|33428100|33428220|33406107|33412495|33431230|33431324	-0.229	ENSMUSG00000068966|Zbtb34|chr2|-|SE|33428100|33428220|33406107|33412495|33431230|33431324|NEG
ENSMUSG00000030556|Lrrc28|chr7|-|A3SS|67559857|67560064|67559857|67559969|67617992|67618130	-0.228	ENSMUSG00000030556|Lrrc28|chr7|-|A3SS|67559857|67560064|67559857|67559969|67617992|67618130|NEG
ENSMUSG00000054823|Nsd3|chr8|+|SE|25691014|25691161|25683151|25683322|25694688|25694845	-0.228	ENSMUSG00000054823|Nsd3|chr8|+|SE|25691014|25691161|25683151|25683322|25694688|25694845|NEG
ENSMUSG00000024130|Abca3|chr17|+|SE|24357918|24357991|24352022|24352251|24360887|24361089	-0.228	ENSMUSG00000024130|Abca3|chr17|+|SE|24357918|24357991|24352022|24352251|24360887|24361089|NEG
ENSMUSG00000026004|Kansl1l|chr1|-|A3SS|66773421|66773619|66773421|66773514|66777966|66778108	-0.227	ENSMUSG00000026004|Kansl1l|chr1|-|A3SS|66773421|66773619|66773421|66773514|66777966|66778108|NEG
ENSMUSG00000022440|C1qtnf6|chr15|-|SE|78525353|78525398|78523347|78525187|78527227|78527468	-0.227	ENSMUSG00000022440|C1qtnf6|chr15|-|SE|78525353|78525398|78523347|78525187|78527227|78527468|NEG
ENSMUSG00000015790|Surf1|chr2|-|A3SS|26915595|26915769|26915595|26915749|26915954|26916006	-0.224	ENSMUSG00000015790|Surf1|chr2|-|A3SS|26915595|26915769|26915595|26915749|26915954|26916006|NEG
ENSMUSG00000039531|Zup1|chr10|-|SE|33950482|33950617|33949747|33949864|33951130|33951235	-0.224	ENSMUSG00000039531|Zup1|chr10|-|SE|33950482|33950617|33949747|33949864|33951130|33951235|NEG
ENSMUSG00000037876|Jmjd1c|chr10|+|A3SS|67218037|67218181|67218116|67218181|67216982|67217107	-0.223	ENSMUSG00000037876|Jmjd1c|chr10|+|A3SS|67218037|67218181|67218116|67218181|67216982|67217107|NEG
ENSMUSG00000058291|Zfp68|chr5|-|SE|138616469|138616559|138612038|138612165|138617054|138617167	-0.223	ENSMUSG00000058291|Zfp68|chr5|-|SE|138616469|138616559|138612038|138612165|138617054|138617167|NEG
ENSMUSG00000040363|Bcor|chrX|-|A3SS|12048302|12048647|12048302|12048545|12048994|12049252	-0.223	ENSMUSG00000040363|Bcor|chrX|-|A3SS|12048302|12048647|12048302|12048545|12048994|12049252|NEG
ENSMUSG00000006476|Nsmf|chr2|+|SE|25057964|25057970|25057100|25057176|25058252|25058321	-0.223	ENSMUSG00000006476|Nsmf|chr2|+|SE|25057964|25057970|25057100|25057176|25058252|25058321|NEG
ENSMUSG00000033439|Trmt13|chr3|-|A3SS|116588471|116588639|116588471|116588524|116589490|116589597	-0.221	ENSMUSG00000033439|Trmt13|chr3|-|A3SS|116588471|116588639|116588471|116588524|116589490|116589597|NEG
ENSMUSG00000021809|Nudt13|chr14|+|SE|20300586|20300679|20294721|20294792|20303952|20304092	-0.218	ENSMUSG00000021809|Nudt13|chr14|+|SE|20300586|20300679|20294721|20294792|20303952|20304092|NEG
ENSMUSG00000011257|Pabpc4|chr4|+|SE|123295749|123295836|123295201|123295321|123295929|123296057	-0.217	ENSMUSG00000011257|Pabpc4|chr4|+|SE|123295749|123295836|123295201|123295321|123295929|123296057|NEG
ENSMUSG00000055660|Mettl4|chr17|-|SE|94743931|94743994|94740385|94740755|94747616|94748417	-0.217	ENSMUSG00000055660|Mettl4|chr17|-|SE|94743931|94743994|94740385|94740755|94747616|94748417|NEG
ENSMUSG00000020716|Nf1|chr11|+|SE|79463232|79463295|79458770|79458906|79468716|79468875	-0.216	ENSMUSG00000020716|Nf1|chr11|+|SE|79463232|79463295|79458770|79458906|79468716|79468875|NEG
ENSMUSG00000050017|Pitpnb|chr5|+|SE|111385519|111385604|111382987|111383110|111386502|111388359	-0.215	ENSMUSG00000050017|Pitpnb|chr5|+|SE|111385519|111385604|111382987|111383110|111386502|111388359|NEG
ENSMUSG00000048442|Smim5|chr11|+|SE|115902986|115903143|115900177|115900342|115905154|115905302	-0.215	ENSMUSG00000048442|Smim5|chr11|+|SE|115902986|115903143|115900177|115900342|115905154|115905302|NEG
ENSMUSG00000022911|Arl13b|chr16|-|SE|62801721|62801790|62793684|62795708|62802719|62802836	-0.213	ENSMUSG00000022911|Arl13b|chr16|-|SE|62801721|62801790|62793684|62795708|62802719|62802836|NEG
ENSMUSG00000058291|Zfp68|chr5|-|SE|138616469|138616565|138612038|138612165|138617054|138617167	-0.212	ENSMUSG00000058291|Zfp68|chr5|-|SE|138616469|138616565|138612038|138612165|138617054|138617167|NEG
ENSMUSG00000030929|Eri2|chr7|-|SE|119787403|119787485|119786738|119786827|119787733|119787834	-0.212	ENSMUSG00000030929|Eri2|chr7|-|SE|119787403|119787485|119786738|119786827|119787733|119787834|NEG
ENSMUSG00000038145|Snrk|chr9|+|A3SS|122133960|122134076|122133986|122134076|122132627|122132750	-0.21	ENSMUSG00000038145|Snrk|chr9|+|A3SS|122133960|122134076|122133986|122134076|122132627|122132750|NEG
ENSMUSG00000028863|Meaf6|chr4|+|SE|125107651|125107709|125102838|125103031|125108322|125108356	-0.209	ENSMUSG00000028863|Meaf6|chr4|+|SE|125107651|125107709|125102838|125103031|125108322|125108356|NEG
ENSMUSG00000032254|Kif23|chr9|-|SE|61933228|61933270|61932074|61932187|61935379|61935550	-0.208	ENSMUSG00000032254|Kif23|chr9|-|SE|61933228|61933270|61932074|61932187|61935379|61935550|NEG
ENSMUSG00000021262|Evl|chr12|+|A5SS|108683194|108683410|108683194|108683261|108686049|108686116	-0.208	ENSMUSG00000021262|Evl|chr12|+|A5SS|108683194|108683410|108683194|108683261|108686049|108686116|NEG
ENSMUSG00000064215|Ifi27|chr12|+|MXE|103437389|103437524|103437675|103437705|103436562|103436682|103439400|103439562	-0.207	ENSMUSG00000064215|Ifi27|chr12|+|MXE|103437389|103437524|103437675|103437705|103436562|103436682|103439400|103439562|NEG
ENSMUSG00000045679|Pqlc3|chr12|-|A3SS|16992277|16993573|16992277|16992319|16995613|16995671	-0.207	ENSMUSG00000045679|Pqlc3|chr12|-|A3SS|16992277|16993573|16992277|16992319|16995613|16995671|NEG
ENSMUSG00000037369|Kdm6a|chrX|+|SE|18246974|18247109|18246196|18246416|18248269|18248359	-0.206	ENSMUSG00000037369|Kdm6a|chrX|+|SE|18246974|18247109|18246196|18246416|18248269|18248359|NEG
ENSMUSG00000030509|Asb7|chr7|-|SE|66678156|66678245|66659649|66660255|66679079|66679341	-0.206	ENSMUSG00000030509|Asb7|chr7|-|SE|66678156|66678245|66659649|66660255|66679079|66679341|NEG
ENSMUSG00000026643|Nmt2|chr2|+|SE|3305396|3305439|3304811|3304947|3309466|3309611	-0.206	ENSMUSG00000026643|Nmt2|chr2|+|SE|3305396|3305439|3304811|3304947|3309466|3309611|NEG
ENSMUSG00000054387|Mdm4|chr1|-|SE|133004653|133004721|133003790|133003890|133009136|133009192	-0.205	ENSMUSG00000054387|Mdm4|chr1|-|SE|133004653|133004721|133003790|133003890|133009136|133009192|NEG
ENSMUSG00000040785|Ttc3|chr16|+|SE|94384345|94384388|94382907|94384066|94384783|94384934	-0.204	ENSMUSG00000040785|Ttc3|chr16|+|SE|94384345|94384388|94382907|94384066|94384783|94384934|NEG
ENSMUSG00000026781|Acbd5|chr2|+|SE|23075545|23075610|23069450|23069619|23078143|23078216	-0.204	ENSMUSG00000026781|Acbd5|chr2|+|SE|23075545|23075610|23069450|23069619|23078143|23078216|NEG
ENSMUSG00000028759|Hp1bp3|chr4|+|SE|138221525|138221718|138217267|138217294|138222088|138222188	-0.203	ENSMUSG00000028759|Hp1bp3|chr4|+|SE|138221525|138221718|138217267|138217294|138222088|138222188|NEG
ENSMUSG00000028797|Tmem234|chr4|+|SE|129602221|129602261|129600982|129601134|129607086|129607179	-0.201	ENSMUSG00000028797|Tmem234|chr4|+|SE|129602221|129602261|129600982|129601134|129607086|129607179|NEG
ENSMUSG00000030177|Ccdc77|chr6|-|A3SS|120350206|120350444|120350206|120350390|120354000|120354054	-0.201	ENSMUSG00000030177|Ccdc77|chr6|-|A3SS|120350206|120350444|120350206|120350390|120354000|120354054|NEG
ENSMUSG00000030016|Zfp638|chr6|+|SE|83956693|83956762|83954710|83954761|83957508|83957592	-0.201	ENSMUSG00000030016|Zfp638|chr6|+|SE|83956693|83956762|83954710|83954761|83957508|83957592|NEG
ENSMUSG00000026788|Zbtb43|chr2|-|SE|33462265|33462357|33453521|33455123|33464913|33464974	-0.2	ENSMUSG00000026788|Zbtb43|chr2|-|SE|33462265|33462357|33453521|33455123|33464913|33464974|NEG
ENSMUSG00000099481|Xndc1|chr7|+|A3SS|102071186|102071361|102071218|102071361|102069896|102069991	-0.197	ENSMUSG00000099481|Xndc1|chr7|+|A3SS|102071186|102071361|102071218|102071361|102069896|102069991|NEG
ENSMUSG00000055541|Lair1|chr7|-|SE|4028706|4029036|4010589|4010632|4055917|4055953	-0.196	ENSMUSG00000055541|Lair1|chr7|-|SE|4028706|4029036|4010589|4010632|4055917|4055953|NEG
ENSMUSG00000021262|Evl|chr12|+|SE|108683347|108683410|108683194|108683261|108686049|108686116	-0.196	ENSMUSG00000021262|Evl|chr12|+|SE|108683347|108683410|108683194|108683261|108686049|108686116|NEG
ENSMUSG00000021557|Agtpbp1|chr13|-|MXE|59528386|59528518|59531056|59531203|59525145|59525239|59532012|59532076	-0.195	ENSMUSG00000021557|Agtpbp1|chr13|-|MXE|59528386|59528518|59531056|59531203|59525145|59525239|59532012|59532076|NEG
ENSMUSG00000028689|Ccdc163|chr4|+|A3SS|116711285|116711378|116711310|116711378|116710100|116710284	-0.195	ENSMUSG00000028689|Ccdc163|chr4|+|A3SS|116711285|116711378|116711310|116711378|116710100|116710284|NEG
ENSMUSG00000035967|Ints6l|chrX|+|SE|56494132|56494243|56493038|56493133|56496515|56496734	-0.194	ENSMUSG00000035967|Ints6l|chrX|+|SE|56494132|56494243|56493038|56493133|56496515|56496734|NEG
ENSMUSG00000054387|Mdm4|chr1|-|SE|133004653|133004692|133003790|133003890|133009136|133009192	-0.193	ENSMUSG00000054387|Mdm4|chr1|-|SE|133004653|133004692|133003790|133003890|133009136|133009192|NEG
ENSMUSG00000019907|Ppp1r12a|chr10|+|SE|108252756|108252924|108251839|108251944|108253324|108253495	-0.193	ENSMUSG00000019907|Ppp1r12a|chr10|+|SE|108252756|108252924|108251839|108251944|108253324|108253495|NEG
ENSMUSG00000048234|Rnf149|chr1|-|SE|39558314|39558411|39555477|39555670|39560692|39560775	-0.191	ENSMUSG00000048234|Rnf149|chr1|-|SE|39558314|39558411|39555477|39555670|39560692|39560775|NEG
ENSMUSG00000028560|Usp1|chr4|+|SE|98926435|98926674|98923878|98924243|98928233|98928354	-0.191	ENSMUSG00000028560|Usp1|chr4|+|SE|98926435|98926674|98923878|98924243|98928233|98928354|NEG
ENSMUSG00000004880|Lbr|chr1|-|SE|181840499|181840610|181839699|181839802|181842287|181842361	-0.188	ENSMUSG00000004880|Lbr|chr1|-|SE|181840499|181840610|181839699|181839802|181842287|181842361|NEG
ENSMUSG00000057551|Zfp317|chr9|+|SE|19632333|19632388|19629096|19629206|19641065|19641254	-0.188	ENSMUSG00000057551|Zfp317|chr9|+|SE|19632333|19632388|19629096|19629206|19641065|19641254|NEG
ENSMUSG00000029208|Guf1|chr5|+|SE|69563082|69563222|69561653|69561857|69564523|69564647	-0.187	ENSMUSG00000029208|Guf1|chr5|+|SE|69563082|69563222|69561653|69561857|69564523|69564647|NEG
ENSMUSG00000029089|5730480H06Rik|chr5|+|SE|48377074|48377165|48375542|48375610|48379329|48379464	-0.187	ENSMUSG00000029089|5730480H06Rik|chr5|+|SE|48377074|48377165|48375542|48375610|48379329|48379464|NEG
ENSMUSG00000037669|Ldah|chr12|+|SE|8227219|8227363|8220599|8220755|8268363|8268598	-0.185	ENSMUSG00000037669|Ldah|chr12|+|SE|8227219|8227363|8220599|8220755|8268363|8268598|NEG
ENSMUSG00000058291|Zfp68|chr5|-|SE|138616469|138616614|138612066|138612165|138617054|138617167	-0.185	ENSMUSG00000058291|Zfp68|chr5|-|SE|138616469|138616614|138612066|138612165|138617054|138617167|NEG
ENSMUSG00000021027|Ralgapa1|chr12|-|SE|55612072|55612103|55602898|55604268|55612633|55612758	-0.184	ENSMUSG00000021027|Ralgapa1|chr12|-|SE|55612072|55612103|55602898|55604268|55612633|55612758|NEG
ENSMUSG00000032089|Il10ra|chr9|-|SE|45267099|45267214|45266454|45266642|45269005|45269146	-0.184	ENSMUSG00000032089|Il10ra|chr9|-|SE|45267099|45267214|45266454|45266642|45269005|45269146|NEG
ENSMUSG00000012076|Brms1l|chr12|+|RI|55868161|55869736|55868161|55868520|55869397|55869736	-0.183	ENSMUSG00000012076|Brms1l|chr12|+|RI|55868161|55869736|55868161|55868520|55869397|55869736|NEG
ENSMUSG00000027751|Supt20|chr3|+|A3SS|54722520|54722640|54722556|54722640|54720405|54720461	-0.183	ENSMUSG00000027751|Supt20|chr3|+|A3SS|54722520|54722640|54722556|54722640|54720405|54720461|NEG
ENSMUSG00000006705|Pknox1|chr17|+|SE|31581803|31582050|31564748|31564888|31583695|31583803	-0.183	ENSMUSG00000006705|Pknox1|chr17|+|SE|31581803|31582050|31564748|31564888|31583695|31583803|NEG
ENSMUSG00000020532|Acaca|chr11|+|SE|84193078|84193125|84179830|84179926|84195437|84195687	-0.183	ENSMUSG00000020532|Acaca|chr11|+|SE|84193078|84193125|84179830|84179926|84195437|84195687|NEG
ENSMUSG00000093954|Gm16867|chr14|-|SE|69421897|69421999|69373012|69373121|69502981|69503226	-0.182	ENSMUSG00000093954|Gm16867|chr14|-|SE|69421897|69421999|69373012|69373121|69502981|69503226|NEG
ENSMUSG00000026812|Tsc1|chr2|+|A3SS|28678951|28679118|28678966|28679118|28678161|28678205	-0.182	ENSMUSG00000026812|Tsc1|chr2|+|A3SS|28678951|28679118|28678966|28679118|28678161|28678205|NEG
ENSMUSG00000074272|Ceacam1|chr7|-|SE|25465467|25465520|25464848|25464880|25466316|25466437	-0.181	ENSMUSG00000074272|Ceacam1|chr7|-|SE|25465467|25465520|25464848|25464880|25466316|25466437|NEG
ENSMUSG00000026977|Marchf7|chr2|+|A3SS|60233898|60234997|60233933|60234997|60232199|60232367	-0.179	ENSMUSG00000026977|Marchf7|chr2|+|A3SS|60233898|60234997|60233933|60234997|60232199|60232367|NEG
ENSMUSG00000028759|Hp1bp3|chr4|+|SE|138221525|138221723|138216295|138216740|138222088|138222188	-0.178	ENSMUSG00000028759|Hp1bp3|chr4|+|SE|138221525|138221723|138216295|138216740|138222088|138222188|NEG
ENSMUSG00000029217|Tec|chr5|-|SE|72779420|72779486|72773208|72773885|72782002|72782175	-0.178	ENSMUSG00000029217|Tec|chr5|-|SE|72779420|72779486|72773208|72773885|72782002|72782175|NEG
ENSMUSG00000037369|Kdm6a|chrX|+|SE|18247566|18247722|18246196|18246416|18248269|18248359	-0.178	ENSMUSG00000037369|Kdm6a|chrX|+|SE|18247566|18247722|18246196|18246416|18248269|18248359|NEG
ENSMUSG00000027104|Atf2|chr2|-|SE|73880284|73880379|73873669|73873745|73892474|73892614	-0.177	ENSMUSG00000027104|Atf2|chr2|-|SE|73880284|73880379|73873669|73873745|73892474|73892614|NEG
ENSMUSG00000000568|Hnrnpd|chr5|-|SE|99976533|99976590|99967218|99967387|99978391|99978449	-0.176	ENSMUSG00000000568|Hnrnpd|chr5|-|SE|99976533|99976590|99967218|99967387|99978391|99978449|NEG
ENSMUSG00000066043|Phactr4|chr4|-|SE|132383281|132383362|132378404|132378563|132386891|132387065	-0.176	ENSMUSG00000066043|Phactr4|chr4|-|SE|132383281|132383362|132378404|132378563|132386891|132387065|NEG
ENSMUSG00000021548|Ccnh|chr13|+|A3SS|85202332|85202496|85202440|85202496|85197350|85197561	-0.175	ENSMUSG00000021548|Ccnh|chr13|+|A3SS|85202332|85202496|85202440|85202496|85197350|85197561|NEG
ENSMUSG00000056770|Setd3|chr12|-|SE|108160232|108160381|108158275|108158348|108162972|108163065	-0.175	ENSMUSG00000056770|Setd3|chr12|-|SE|108160232|108160381|108158275|108158348|108162972|108163065|NEG
ENSMUSG00000020166|Cnot2|chr10|-|SE|116549032|116549105|116527826|116527949|116581452|116581483	-0.175	ENSMUSG00000020166|Cnot2|chr10|-|SE|116549032|116549105|116527826|116527949|116581452|116581483|NEG
ENSMUSG00000040213|Kyat3|chr3|+|SE|142706688|142706795|142701079|142701175|142718375|142718434	-0.175	ENSMUSG00000040213|Kyat3|chr3|+|SE|142706688|142706795|142701079|142701175|142718375|142718434|NEG
ENSMUSG00000038145|Snrk|chr9|+|SE|122131892|122131942|122117265|122117407|122136905|122137601	-0.175	ENSMUSG00000038145|Snrk|chr9|+|SE|122131892|122131942|122117265|122117407|122136905|122137601|NEG
ENSMUSG00000030177|Ccdc77|chr6|-|SE|120339134|120339198|120337772|120338160|120341972|120342069	-0.175	ENSMUSG00000030177|Ccdc77|chr6|-|SE|120339134|120339198|120337772|120338160|120341972|120342069|NEG
ENSMUSG00000021156|Zmynd11|chr13|-|SE|9710145|9710307|9698627|9698705|9720772|9720928	-0.174	ENSMUSG00000021156|Zmynd11|chr13|-|SE|9710145|9710307|9698627|9698705|9720772|9720928|NEG
ENSMUSG00000039285|Azi2|chr9|+|SE|118049896|118049996|118049309|118049435|118051353|118051502	-0.173	ENSMUSG00000039285|Azi2|chr9|+|SE|118049896|118049996|118049309|118049435|118051353|118051502|NEG
ENSMUSG00000022534|Mefv|chr16|-|A3SS|3707685|3708097|3707685|3708032|3708544|3708837	-0.172	ENSMUSG00000022534|Mefv|chr16|-|A3SS|3707685|3708097|3707685|3708032|3708544|3708837|NEG
ENSMUSG00000027201|Myef2|chr2|-|SE|125097562|125097634|125095911|125096120|125097976|125098075	-0.171	ENSMUSG00000027201|Myef2|chr2|-|SE|125097562|125097634|125095911|125096120|125097976|125098075|NEG
ENSMUSG00000060216|Arrb2|chr11|+|SE|70435515|70435572|70432681|70432753|70436162|70436223	-0.171	ENSMUSG00000060216|Arrb2|chr11|+|SE|70435515|70435572|70432681|70432753|70436162|70436223|NEG
ENSMUSG00000029283|Cdc7|chr5|+|SE|106974600|106974696|106973776|106974020|106975484|106975660	-0.171	ENSMUSG00000029283|Cdc7|chr5|+|SE|106974600|106974696|106973776|106974020|106975484|106975660|NEG
ENSMUSG00000032641|Gpr19|chr6|-|SE|134877216|134877334|134869092|134870443|134887629|134887785	-0.171	ENSMUSG00000032641|Gpr19|chr6|-|SE|134877216|134877334|134869092|134870443|134887629|134887785|NEG
ENSMUSG00000090626|Tex9|chr9|-|SE|72477736|72477910|72473657|72473792|72478339|72478422	-0.171	ENSMUSG00000090626|Tex9|chr9|-|SE|72477736|72477910|72473657|72473792|72478339|72478422|NEG
ENSMUSG00000045679|Pqlc3|chr12|-|SE|16993452|16993573|16992277|16992319|16995613|16995671	-0.17	ENSMUSG00000045679|Pqlc3|chr12|-|SE|16993452|16993573|16992277|16992319|16995613|16995671|NEG
ENSMUSG00000039531|Zup1|chr10|-|SE|33935088|33935257|33930155|33930344|33940157|33940279	-0.17	ENSMUSG00000039531|Zup1|chr10|-|SE|33935088|33935257|33930155|33930344|33940157|33940279|NEG
ENSMUSG00000000631|Myo18a|chr11|+|SE|77822662|77822674|77821041|77821186|77823275|77823446	-0.169	ENSMUSG00000000631|Myo18a|chr11|+|SE|77822662|77822674|77821041|77821186|77823275|77823446|NEG
ENSMUSG00000056267|Cep70|chr9|+|SE|99263628|99263809|99262825|99262949|99275577|99275747	-0.169	ENSMUSG00000056267|Cep70|chr9|+|SE|99263628|99263809|99262825|99262949|99275577|99275747|NEG
ENSMUSG00000038708|Golga4|chr9|+|SE|118537241|118537325|118536758|118536943|118538876|118539024	-0.169	ENSMUSG00000038708|Golga4|chr9|+|SE|118537241|118537325|118536758|118536943|118538876|118539024|NEG
ENSMUSG00000024217|Snrpc|chr17|+|RI|27840463|27842378|27840463|27840806|27842269|27842378	-0.169	ENSMUSG00000024217|Snrpc|chr17|+|RI|27840463|27842378|27840463|27840806|27842269|27842378|NEG
ENSMUSG00000059890|Ube4a|chr9|-|SE|44963363|44963432|44959978|44960139|44965484|44965525	-0.169	ENSMUSG00000059890|Ube4a|chr9|-|SE|44963363|44963432|44959978|44960139|44965484|44965525|NEG
ENSMUSG00000041890|Git2|chr5|-|SE|114743730|114743880|114739032|114739281|114745428|114745571	-0.168	ENSMUSG00000041890|Git2|chr5|-|SE|114743730|114743880|114739032|114739281|114745428|114745571|NEG
ENSMUSG00000046879|Irgm1|chr11|-|SE|48868561|48868780|48865244|48867003|48871093|48871374	-0.168	ENSMUSG00000046879|Irgm1|chr11|-|SE|48868561|48868780|48865244|48867003|48871093|48871374|NEG
ENSMUSG00000063849|Ppcdc|chr9|-|A3SS|57415085|57415472|57415085|57415254|57420162|57420291	-0.167	ENSMUSG00000063849|Ppcdc|chr9|-|A3SS|57415085|57415472|57415085|57415254|57420162|57420291|NEG
ENSMUSG00000033014|Trim33|chr3|+|SE|103353566|103353617|103352002|103352155|103353696|103353923	-0.166	ENSMUSG00000033014|Trim33|chr3|+|SE|103353566|103353617|103352002|103352155|103353696|103353923|NEG
ENSMUSG00000026646|Suv39h2|chr2|-|SE|3472501|3472647|3464266|3464926|3474702|3474960	-0.166	ENSMUSG00000026646|Suv39h2|chr2|-|SE|3472501|3472647|3464266|3464926|3474702|3474960|NEG
ENSMUSG00000037669|Ldah|chr12|+|SE|8238442|8238615|8220599|8220755|8268363|8268598	-0.165	ENSMUSG00000037669|Ldah|chr12|+|SE|8238442|8238615|8220599|8220755|8268363|8268598|NEG
ENSMUSG00000039768|Dnajc11|chr4|+|RI|151968498|151970930|151968498|151968627|151970856|151970930	-0.165	ENSMUSG00000039768|Dnajc11|chr4|+|RI|151968498|151970930|151968498|151968627|151970856|151970930|NEG
ENSMUSG00000020608|Smc6|chr12|+|SE|11273993|11274111|11271728|11271871|11279604|11279741	-0.164	ENSMUSG00000020608|Smc6|chr12|+|SE|11273993|11274111|11271728|11271871|11279604|11279741|NEG
ENSMUSG00000000326|Comt|chr16|-|SE|18424303|18424360|18411689|18411957|18426355|18426604	-0.164	ENSMUSG00000000326|Comt|chr16|-|SE|18424303|18424360|18411689|18411957|18426355|18426604|NEG
ENSMUSG00000030166|Rad52|chr6|+|SE|119913898|119913992|119913001|119913103|119914169|119914237	-0.164	ENSMUSG00000030166|Rad52|chr6|+|SE|119913898|119913992|119913001|119913103|119914169|119914237|NEG
ENSMUSG00000054894|Atp5s|chr12|+|SE|69737950|69738061|69724961|69725014|69740898|69741107	-0.163	ENSMUSG00000054894|Atp5s|chr12|+|SE|69737950|69738061|69724961|69725014|69740898|69741107|NEG
ENSMUSG00000032366|Tpm1|chr9|-|SE|67031950|67032026|67031451|67031514|67032793|67032864	-0.163	ENSMUSG00000032366|Tpm1|chr9|-|SE|67031950|67032026|67031451|67031514|67032793|67032864|NEG
ENSMUSG00000000600|Krit1|chr5|+|A3SS|3806418|3806568|3806464|3806568|3803183|3803483	-0.162	ENSMUSG00000000600|Krit1|chr5|+|A3SS|3806418|3806568|3806464|3806568|3803183|3803483|NEG
ENSMUSG00000025157|Zdhhc16|chr19|+|SE|41939856|41939904|41939599|41939733|41940649|41940713	-0.162	ENSMUSG00000025157|Zdhhc16|chr19|+|SE|41939856|41939904|41939599|41939733|41940649|41940713|NEG
ENSMUSG00000019961|Tmpo|chr10|-|SE|91153277|91153397|91153084|91153180|91158747|91158845	-0.161	ENSMUSG00000019961|Tmpo|chr10|-|SE|91153277|91153397|91153084|91153180|91158747|91158845|NEG
ENSMUSG00000038481|Cdk19|chr10|+|SE|40454014|40454072|40436071|40436212|40466637|40466769	-0.161	ENSMUSG00000038481|Cdk19|chr10|+|SE|40454014|40454072|40436071|40436212|40466637|40466769|NEG
ENSMUSG00000049755|Zfp672|chr11|-|SE|58322599|58322729|58319323|58319590|58323269|58323314	-0.161	ENSMUSG00000049755|Zfp672|chr11|-|SE|58322599|58322729|58319323|58319590|58323269|58323314|NEG
ENSMUSG00000027508|Pag1|chr3|-|SE|9787261|9787320|9752073|9752486|9833210|9833363	-0.161	ENSMUSG00000027508|Pag1|chr3|-|SE|9787261|9787320|9752073|9752486|9833210|9833363|NEG
ENSMUSG00000026358|Rgs1|chr1|-|RI|144247905|144248559|144247905|144247967|144248478|144248559	-0.161	ENSMUSG00000026358|Rgs1|chr1|-|RI|144247905|144248559|144247905|144247967|144248478|144248559|NEG
ENSMUSG00000029472|Anapc5|chr5|-|A3SS|122800450|122800632|122800450|122800593|122802129|122802219	-0.16	ENSMUSG00000029472|Anapc5|chr5|-|A3SS|122800450|122800632|122800450|122800593|122802129|122802219|NEG
ENSMUSG00000034160|Ogt|chrX|+|A3SS|101642975|101643156|101643005|101643156|101640217|101640322	-0.16	ENSMUSG00000034160|Ogt|chrX|+|A3SS|101642975|101643156|101643005|101643156|101640217|101640322|NEG
ENSMUSG00000030766|Arhgap17|chr7|-|SE|123285419|123285467|123279217|123280116|123286497|123287013	-0.16	ENSMUSG00000030766|Arhgap17|chr7|-|SE|123285419|123285467|123279217|123280116|123286497|123287013|NEG
ENSMUSG00000027111|Itga6|chr2|+|SE|71853533|71853663|71849380|71849506|71855853|71856758	-0.158	ENSMUSG00000027111|Itga6|chr2|+|SE|71853533|71853663|71849380|71849506|71855853|71856758|NEG
ENSMUSG00000033931|Rbm34|chr8|-|SE|126961911|126961971|126959541|126959585|126965381|126965622	-0.158	ENSMUSG00000033931|Rbm34|chr8|-|SE|126961911|126961971|126959541|126959585|126965381|126965622|NEG
ENSMUSG00000043940|Wdfy3|chr5|-|SE|101878005|101878059|101875840|101876009|101882422|101882650	-0.158	ENSMUSG00000043940|Wdfy3|chr5|-|SE|101878005|101878059|101875840|101876009|101882422|101882650|NEG
ENSMUSG00000032637|Atxn2l|chr7|-|SE|126492448|126492485|126492152|126492215|126492811|126493001	-0.158	ENSMUSG00000032637|Atxn2l|chr7|-|SE|126492448|126492485|126492152|126492215|126492811|126493001|NEG
ENSMUSG00000030246|Ldhb|chr6|-|SE|142492492|142492616|142490248|142490604|142494099|142494217	-0.157	ENSMUSG00000030246|Ldhb|chr6|-|SE|142492492|142492616|142490248|142490604|142494099|142494217|NEG
ENSMUSG00000046873|Mbtps2|chrX|-|SE|157593724|157593873|157591056|157591555|157598495|157598643	-0.157	ENSMUSG00000046873|Mbtps2|chrX|-|SE|157593724|157593873|157591056|157591555|157598495|157598643|NEG
ENSMUSG00000033364|Usp37|chr1|-|SE|74459914|74459980|74456078|74456220|74461565|74461730	-0.157	ENSMUSG00000033364|Usp37|chr1|-|SE|74459914|74459980|74456078|74456220|74461565|74461730|NEG
ENSMUSG00000028797|Tmem234|chr4|+|SE|129602194|129602261|129600982|129601134|129607086|129607162	-0.156	ENSMUSG00000028797|Tmem234|chr4|+|SE|129602194|129602261|129600982|129601134|129607086|129607162|NEG
ENSMUSG00000028034|Fubp1|chr3|+|RI|152231876|152234570|152231876|152232022|152234523|152234570	-0.156	ENSMUSG00000028034|Fubp1|chr3|+|RI|152231876|152234570|152231876|152232022|152234523|152234570|NEG
ENSMUSG00000046862|Pramef8|chr4|+|SE|143415348|143415413|143412425|143413091|143416639|143416952	-0.156	ENSMUSG00000046862|Pramef8|chr4|+|SE|143415348|143415413|143412425|143413091|143416639|143416952|NEG
ENSMUSG00000028549|Itgb3bp|chr4|-|SE|99802096|99802232|99789600|99789679|99814057|99814100	-0.155	ENSMUSG00000028549|Itgb3bp|chr4|-|SE|99802096|99802232|99789600|99789679|99814057|99814100|NEG
ENSMUSG00000027405|Nop56|chr2|+|SE|130277031|130277314|130276596|130276653|130277475|130277624	-0.155	ENSMUSG00000027405|Nop56|chr2|+|SE|130277031|130277314|130276596|130276653|130277475|130277624|NEG
ENSMUSG00000032812|Arap1|chr7|+|SE|101404932|101404965|101404279|101404425|101408046|101408129	-0.154	ENSMUSG00000032812|Arap1|chr7|+|SE|101404932|101404965|101404279|101404425|101408046|101408129|NEG
ENSMUSG00000074151|Nlrc5|chr8|+|SE|94459691|94459799|94446057|94446133|94469816|94470216	-0.154	ENSMUSG00000074151|Nlrc5|chr8|+|SE|94459691|94459799|94446057|94446133|94469816|94470216|NEG
ENSMUSG00000038538|Ubn2|chr6|+|SE|38489253|38489304|38487107|38487150|38490383|38491931	-0.154	ENSMUSG00000038538|Ubn2|chr6|+|SE|38489253|38489304|38487107|38487150|38490383|38491931|NEG
ENSMUSG00000037486|Asxl2|chr12|+|SE|3476025|3476169|3474489|3474613|3484444|3484608	-0.154	ENSMUSG00000037486|Asxl2|chr12|+|SE|3476025|3476169|3474489|3474613|3484444|3484608|NEG
ENSMUSG00000028560|Usp1|chr4|+|SE|98926454|98926674|98923809|98924243|98928233|98928354	-0.154	ENSMUSG00000028560|Usp1|chr4|+|SE|98926454|98926674|98923809|98924243|98928233|98928354|NEG
ENSMUSG00000017686|Rhot1|chr11|+|SE|80255861|80255957|80254659|80254862|80257513|80257636	-0.154	ENSMUSG00000017686|Rhot1|chr11|+|SE|80255861|80255957|80254659|80254862|80257513|80257636|NEG
ENSMUSG00000020608|Smc6|chr12|+|SE|11276259|11276365|11271728|11271871|11279604|11279727	-0.153	ENSMUSG00000020608|Smc6|chr12|+|SE|11276259|11276365|11271728|11271871|11279604|11279727|NEG
ENSMUSG00000037300|Ttc13|chr8|-|SE|124699655|124699721|124690276|124690359|124709902|124709948	-0.153	ENSMUSG00000037300|Ttc13|chr8|-|SE|124699655|124699721|124690276|124690359|124709902|124709948|NEG
ENSMUSG00000021621|Zcchc9|chr13|-|SE|91798822|91798891|91796532|91797254|91800610|91800703	-0.153	ENSMUSG00000021621|Zcchc9|chr13|-|SE|91798822|91798891|91796532|91797254|91800610|91800703|NEG
ENSMUSG00000036916|Zfp280c|chrX|-|SE|48543584|48543703|48543404|48543441|48547264|48547327	-0.153	ENSMUSG00000036916|Zfp280c|chrX|-|SE|48543584|48543703|48543404|48543441|48547264|48547327|NEG
ENSMUSG00000048271|Rbm33|chr5|+|SE|28342394|28342514|28338995|28339308|28352471|28352643	-0.153	ENSMUSG00000048271|Rbm33|chr5|+|SE|28342394|28342514|28338995|28339308|28352471|28352643|NEG
ENSMUSG00000036270|Edc4|chr8|+|A3SS|105889630|105889729|105889672|105889729|105889103|105889540	-0.153	ENSMUSG00000036270|Edc4|chr8|+|A3SS|105889630|105889729|105889672|105889729|105889103|105889540|NEG
ENSMUSG00000004980|Hnrnpa2b1|chr6|-|SE|51464427|51464547|51464088|51464211|51465178|51465241	-0.152	ENSMUSG00000004980|Hnrnpa2b1|chr6|-|SE|51464427|51464547|51464088|51464211|51465178|51465241|NEG
ENSMUSG00000028797|Tmem234|chr4|+|A5SS|129600982|129601243|129600982|129601134|129607086|129607179	-0.152	ENSMUSG00000028797|Tmem234|chr4|+|A5SS|129600982|129601243|129600982|129601134|129607086|129607179|NEG
ENSMUSG00000042446|Zmym4|chr4|-|SE|126907085|126907236|126906520|126906636|126910789|126911002	-0.152	ENSMUSG00000042446|Zmym4|chr4|-|SE|126907085|126907236|126906520|126906636|126910789|126911002|NEG
ENSMUSG00000039361|Picalm|chr7|+|SE|90182218|90182368|90177499|90177603|90189149|90189257	-0.152	ENSMUSG00000039361|Picalm|chr7|+|SE|90182218|90182368|90177499|90177603|90189149|90189257|NEG
ENSMUSG00000052889|Prkcb|chr7|+|SE|122627655|122627871|122600689|122600830|122633744|122634399	-0.151	ENSMUSG00000052889|Prkcb|chr7|+|SE|122627655|122627871|122600689|122600830|122633744|122634399|NEG
ENSMUSG00000029283|Cdc7|chr5|+|A3SS|106974600|106975660|106975484|106975660|106973776|106974020	-0.151	ENSMUSG00000029283|Cdc7|chr5|+|A3SS|106974600|106975660|106975484|106975660|106973776|106974020|NEG
ENSMUSG00000041890|Git2|chr5|-|SE|114743775|114743880|114739032|114739281|114745428|114745571	-0.151	ENSMUSG00000041890|Git2|chr5|-|SE|114743775|114743880|114739032|114739281|114745428|114745571|NEG
ENSMUSG00000055681|Cope|chr8|+|RI|70304633|70306651|70304633|70304696|70306498|70306651	-0.15	ENSMUSG00000055681|Cope|chr8|+|RI|70304633|70306651|70304633|70304696|70306498|70306651|NEG
ENSMUSG00000028295|Smim8|chr4|-|SE|34771877|34772053|34770887|34771414|34778223|34778270	-0.15	ENSMUSG00000028295|Smim8|chr4|-|SE|34771877|34772053|34770887|34771414|34778223|34778270|NEG
ENSMUSG00000024962|Vegfb|chr19|-|A3SS|6985360|6985596|6985360|6985495|6985804|6985840	-0.149	ENSMUSG00000024962|Vegfb|chr19|-|A3SS|6985360|6985596|6985360|6985495|6985804|6985840|NEG
ENSMUSG00000033540|Idua|chr5|+|A3SS|108680294|108680497|108680394|108680497|108680110|108680206	-0.149	ENSMUSG00000033540|Idua|chr5|+|A3SS|108680294|108680497|108680394|108680497|108680110|108680206|NEG
ENSMUSG00000002107|Celf2|chr2|-|SE|6549831|6549975|6546239|6547213|6553784|6553964	-0.148	ENSMUSG00000002107|Celf2|chr2|-|SE|6549831|6549975|6546239|6547213|6553784|6553964|NEG
ENSMUSG00000028211|Trp53inp1|chr4|+|SE|11167896|11167934|11165089|11165447|11169709|11174379	-0.148	ENSMUSG00000028211|Trp53inp1|chr4|+|SE|11167896|11167934|11165089|11165447|11169709|11174379|NEG
ENSMUSG00000052142|Rasal3|chr17|-|RI|32403055|32403581|32403055|32403399|32403520|32403581	-0.147	ENSMUSG00000052142|Rasal3|chr17|-|RI|32403055|32403581|32403055|32403399|32403520|32403581|NEG
ENSMUSG00000029782|Tmem209|chr6|-|SE|30506785|30506917|30505732|30505974|30508453|30508512	-0.146	ENSMUSG00000029782|Tmem209|chr6|-|SE|30506785|30506917|30505732|30505974|30508453|30508512|NEG
ENSMUSG00000028587|Orc1|chr4|+|SE|108590652|108590777|108588675|108588781|108593292|108593471	-0.146	ENSMUSG00000028587|Orc1|chr4|+|SE|108590652|108590777|108588675|108588781|108593292|108593471|NEG
ENSMUSG00000023186|Vwa5a|chr9|+|SE|38719257|38719333|38718267|38718387|38722372|38722430	-0.145	ENSMUSG00000023186|Vwa5a|chr9|+|SE|38719257|38719333|38718267|38718387|38722372|38722430|NEG
ENSMUSG00000031712|Il15|chr8|-|A3SS|82334468|82334606|82334468|82334558|82337565|82337610	-0.145	ENSMUSG00000031712|Il15|chr8|-|A3SS|82334468|82334606|82334468|82334558|82337565|82337610|NEG
ENSMUSG00000044367|Slc16a13|chr11|-|SE|70220194|70220338|70218592|70219330|70220478|70220994	-0.145	ENSMUSG00000044367|Slc16a13|chr11|-|SE|70220194|70220338|70218592|70219330|70220478|70220994|NEG
ENSMUSG00000037544|Dlgap5|chr14|-|A3SS|47405774|47405901|47405774|47405865|47406338|47406418	-0.143	ENSMUSG00000037544|Dlgap5|chr14|-|A3SS|47405774|47405901|47405774|47405865|47406338|47406418|NEG
ENSMUSG00000021311|Mtr|chr13|-|SE|12249844|12249914|12247892|12247985|12250601|12250691	-0.143	ENSMUSG00000021311|Mtr|chr13|-|SE|12249844|12249914|12247892|12247985|12250601|12250691|NEG
ENSMUSG00000063358|Mapk1|chr16|+|SE|17026357|17026489|17026025|17026140|17035441|17035551	-0.142	ENSMUSG00000063358|Mapk1|chr16|+|SE|17026357|17026489|17026025|17026140|17035441|17035551|NEG
ENSMUSG00000021905|Dph3|chr14|-|SE|32084906|32085107|32080568|32083246|32085409|32085609	-0.142	ENSMUSG00000021905|Dph3|chr14|-|SE|32084906|32085107|32080568|32083246|32085409|32085609|NEG
ENSMUSG00000020527|Myo19|chr11|+|SE|84893324|84893394|84892075|84892208|84894549|84894652	-0.142	ENSMUSG00000020527|Myo19|chr11|+|SE|84893324|84893394|84892075|84892208|84894549|84894652|NEG
ENSMUSG00000055541|Lair1|chr7|-|SE|4028706|4029036|4010729|4010846|4055796|4055953	-0.142	ENSMUSG00000055541|Lair1|chr7|-|SE|4028706|4029036|4010729|4010846|4055796|4055953|NEG
ENSMUSG00000027667|Zfp639|chr3|+|A3SS|32515283|32517139|32517028|32517139|32514383|32514454	-0.142	ENSMUSG00000027667|Zfp639|chr3|+|A3SS|32515283|32517139|32517028|32517139|32514383|32514454|NEG
ENSMUSG00000004980|Hnrnpa2b1|chr6|-|SE|51461919|51462055|51461120|51461433|51463410|51463493	-0.141	ENSMUSG00000004980|Hnrnpa2b1|chr6|-|SE|51461919|51462055|51461120|51461433|51463410|51463493|NEG
ENSMUSG00000019813|Cep57l1|chr10|-|SE|41728627|41728714|41723860|41723938|41729330|41729408	-0.141	ENSMUSG00000019813|Cep57l1|chr10|-|SE|41728627|41728714|41723860|41723938|41729330|41729408|NEG
ENSMUSG00000033540|Idua|chr5|+|RI|108680110|108680497|108680110|108680206|108680394|108680497	-0.141	ENSMUSG00000033540|Idua|chr5|+|RI|108680110|108680497|108680110|108680206|108680394|108680497|NEG
ENSMUSG00000025261|Huwe1|chrX|+|SE|151806271|151806407|151803346|151803569|151806719|151806860	-0.14	ENSMUSG00000025261|Huwe1|chrX|+|SE|151806271|151806407|151803346|151803569|151806719|151806860|NEG
ENSMUSG00000038679|Trps1|chr15|-|SE|50765504|50765537|50664686|50664809|50822104|50822708	-0.14	ENSMUSG00000038679|Trps1|chr15|-|SE|50765504|50765537|50664686|50664809|50822104|50822708|NEG
ENSMUSG00000055447|Cd47|chr16|+|SE|49869017|49869080|49867764|49868112|49884164|49884254	-0.139	ENSMUSG00000055447|Cd47|chr16|+|SE|49869017|49869080|49867764|49868112|49884164|49884254|NEG
ENSMUSG00000056211|R3hdm1|chr1|+|SE|128184399|128184654|128181985|128182212|128186757|128186909	-0.139	ENSMUSG00000056211|R3hdm1|chr1|+|SE|128184399|128184654|128181985|128182212|128186757|128186909|NEG
ENSMUSG00000031516|Dctn6|chr8|-|MXE|34098918|34099101|34104985|34105098|34097188|34097294|34106341|34106406	-0.139	ENSMUSG00000031516|Dctn6|chr8|-|MXE|34098918|34099101|34104985|34105098|34097188|34097294|34106341|34106406|NEG
ENSMUSG00000023008|Fmnl3|chr15|-|SE|99329279|99329432|99328057|99328166|99331986|99332070	-0.139	ENSMUSG00000023008|Fmnl3|chr15|-|SE|99329279|99329432|99328057|99328166|99331986|99332070|NEG
ENSMUSG00000019710|Mrpl24|chr3|+|SE|87919802|87919828|87919535|87919705|87921816|87922052	-0.138	ENSMUSG00000019710|Mrpl24|chr3|+|SE|87919802|87919828|87919535|87919705|87921816|87922052|NEG
ENSMUSG00000025558|Dock9|chr14|-|SE|121577346|121577424|121575912|121576019|121578154|121578212	-0.138	ENSMUSG00000025558|Dock9|chr14|-|SE|121577346|121577424|121575912|121576019|121578154|121578212|NEG
ENSMUSG00000026082|Rev1|chr1|-|SE|38074898|38075023|38074314|38074443|38079289|38079398	-0.138	ENSMUSG00000026082|Rev1|chr1|-|SE|38074898|38075023|38074314|38074443|38079289|38079398|NEG
ENSMUSG00000078681|Tm2d3|chr7|+|A3SS|65695142|65695327|65695169|65695327|65693850|65693943	-0.137	ENSMUSG00000078681|Tm2d3|chr7|+|A3SS|65695142|65695327|65695169|65695327|65693850|65693943|NEG
ENSMUSG00000022983|Scaf4|chr16|-|A3SS|90242526|90242718|90242526|90242652|90242871|90242958	-0.137	ENSMUSG00000022983|Scaf4|chr16|-|A3SS|90242526|90242718|90242526|90242652|90242871|90242958|NEG
ENSMUSG00000037697|Ddhd1|chr14|-|SE|45622840|45622942|45620711|45620840|45629579|45629753	-0.137	ENSMUSG00000037697|Ddhd1|chr14|-|SE|45622840|45622942|45620711|45620840|45629579|45629753|NEG
ENSMUSG00000027620|Rbm39|chr2|-|SE|156174096|156174168|156172827|156173022|156176402|156176457	-0.136	ENSMUSG00000027620|Rbm39|chr2|-|SE|156174096|156174168|156172827|156173022|156176402|156176457|NEG
ENSMUSG00000094870|Zfp131|chr13|-|RI|119775766|119776449|119775766|119775989|119776091|119776449	-0.136	ENSMUSG00000094870|Zfp131|chr13|-|RI|119775766|119776449|119775766|119775989|119776091|119776449|NEG
ENSMUSG00000051721|Wdcp|chr12|+|SE|4848862|4849113|4843393|4843451|4850126|4851767	-0.136	ENSMUSG00000051721|Wdcp|chr12|+|SE|4848862|4849113|4843393|4843451|4850126|4851767|NEG
ENSMUSG00000041926|Rnpep|chr1|-|SE|135272361|135272478|135271528|135271764|135277388|135277537	-0.135	ENSMUSG00000041926|Rnpep|chr1|-|SE|135272361|135272478|135271528|135271764|135277388|135277537|NEG
ENSMUSG00000031901|Dus2|chr8|+|SE|106031697|106031741|106030351|106030443|106033722|106033783	-0.135	ENSMUSG00000031901|Dus2|chr8|+|SE|106031697|106031741|106030351|106030443|106033722|106033783|NEG
ENSMUSG00000029647|Pan3|chr5|+|SE|147488110|147488258|147455117|147455188|147519504|147519752	-0.134	ENSMUSG00000029647|Pan3|chr5|+|SE|147488110|147488258|147455117|147455188|147519504|147519752|NEG
ENSMUSG00000062797|Hikeshi|chr7|-|SE|89935726|89935964|89923563|89923715|89940968|89941066	-0.134	ENSMUSG00000062797|Hikeshi|chr7|-|SE|89935726|89935964|89923563|89923715|89940968|89941066|NEG
ENSMUSG00000032178|Ilf3|chr9|+|SE|21388111|21388150|21387699|21387797|21388523|21388753	-0.133	ENSMUSG00000032178|Ilf3|chr9|+|SE|21388111|21388150|21387699|21387797|21388523|21388753|NEG
ENSMUSG00000035824|Tk2|chr8|-|SE|104247646|104247684|104243384|104243459|104248400|104248533	-0.133	ENSMUSG00000035824|Tk2|chr8|-|SE|104247646|104247684|104243384|104243459|104248400|104248533|NEG
ENSMUSG00000040213|Kyat3|chr3|+|SE|142706688|142706791|142701050|142701175|142718375|142718434	-0.133	ENSMUSG00000040213|Kyat3|chr3|+|SE|142706688|142706791|142701050|142701175|142718375|142718434|NEG
ENSMUSG00000021457|Syk|chr13|+|SE|52624707|52624776|52623244|52623276|52631656|52631744	-0.132	ENSMUSG00000021457|Syk|chr13|+|SE|52624707|52624776|52623244|52623276|52631656|52631744|NEG
ENSMUSG00000032316|Clk3|chr9|-|A5SS|57758626|57761040|57760823|57761040|57758283|57758350	-0.132	ENSMUSG00000032316|Clk3|chr9|-|A5SS|57758626|57761040|57760823|57761040|57758283|57758350|NEG
ENSMUSG00000042138|Msantd2|chr9|+|SE|37513613|37513703|37489818|37489833|37517372|37517472	-0.132	ENSMUSG00000042138|Msantd2|chr9|+|SE|37513613|37513703|37489818|37489833|37517372|37517472|NEG
ENSMUSG00000036167|Pphln1|chr15|+|SE|93452116|93452173|93441500|93441712|93455450|93455530	-0.131	ENSMUSG00000036167|Pphln1|chr15|+|SE|93452116|93452173|93441500|93441712|93455450|93455530|NEG
ENSMUSG00000036167|Pphln1|chr15|+|SE|93420283|93420490|93410691|93410783|93424013|93424075	-0.131	ENSMUSG00000036167|Pphln1|chr15|+|SE|93420283|93420490|93410691|93410783|93424013|93424075|NEG
ENSMUSG00000034681|Rnps1|chr17|+|SE|24418037|24418218|24415040|24415162|24418456|24418612	-0.131	ENSMUSG00000034681|Rnps1|chr17|+|SE|24418037|24418218|24415040|24415162|24418456|24418612|NEG
ENSMUSG00000053332|Gas5|chr1|+|SE|161037123|161037164|161036819|161036852|161037287|161037315	-0.13	ENSMUSG00000053332|Gas5|chr1|+|SE|161037123|161037164|161036819|161036852|161037287|161037315|NEG
ENSMUSG00000033557|Fam20b|chr1|-|SE|156716887|156716980|156705667|156706167|156718865|156719072	-0.129	ENSMUSG00000033557|Fam20b|chr1|-|SE|156716887|156716980|156705667|156706167|156718865|156719072|NEG
ENSMUSG00000063052|Lrrc40|chr3|+|SE|158043560|158043690|158036699|158036876|158048400|158048524	-0.129	ENSMUSG00000063052|Lrrc40|chr3|+|SE|158043560|158043690|158036699|158036876|158048400|158048524|NEG
ENSMUSG00000060450|Rnf14|chr18|+|SE|38301655|38301807|38300428|38300590|38307864|38308395	-0.129	ENSMUSG00000060450|Rnf14|chr18|+|SE|38301655|38301807|38300428|38300590|38307864|38308395|NEG
ENSMUSG00000032316|Clk3|chr9|-|RI|57758283|57761040|57758283|57758350|57760823|57761040	-0.129	ENSMUSG00000032316|Clk3|chr9|-|RI|57758283|57761040|57758283|57758350|57760823|57761040|NEG
ENSMUSG00000029209|Gnpda2|chr5|-|A3SS|69579507|69579692|69579507|69579686|69584973|69585156	-0.129	ENSMUSG00000029209|Gnpda2|chr5|-|A3SS|69579507|69579692|69579507|69579686|69584973|69585156|NEG
ENSMUSG00000034908|Sidt2|chr9|-|SE|45947628|45947697|45946983|45947055|45947835|45947888	-0.128	ENSMUSG00000034908|Sidt2|chr9|-|SE|45947628|45947697|45946983|45947055|45947835|45947888|NEG
ENSMUSG00000047045|Tmem164|chrX|+|SE|142682290|142682949|142681417|142681556|142752039|142752089	-0.128	ENSMUSG00000047045|Tmem164|chrX|+|SE|142682290|142682949|142681417|142681556|142752039|142752089|NEG
ENSMUSG00000042265|Trem1|chr17|+|SE|48236997|48237354|48232770|48232843|48241485|48241669	-0.128	ENSMUSG00000042265|Trem1|chr17|+|SE|48236997|48237354|48232770|48232843|48241485|48241669|NEG
ENSMUSG00000040455|Usp45|chr4|+|SE|21817500|21817644|21816881|21816938|21824416|21825077	-0.128	ENSMUSG00000040455|Usp45|chr4|+|SE|21817500|21817644|21816881|21816938|21824416|21825077|NEG
ENSMUSG00000028104|Polr3gl|chr3|-|SE|96582087|96582255|96581643|96581773|96594083|96594181	-0.128	ENSMUSG00000028104|Polr3gl|chr3|-|SE|96582087|96582255|96581643|96581773|96594083|96594181|NEG
ENSMUSG00000046230|Vps13a|chr19|-|SE|16744823|16744957|16742995|16743058|16745660|16745767	-0.127	ENSMUSG00000046230|Vps13a|chr19|-|SE|16744823|16744957|16742995|16743058|16745660|16745767|NEG
ENSMUSG00000041297|Cdk13|chr13|-|A3SS|17719355|17719805|17719355|17719625|17721087|17721293	-0.127	ENSMUSG00000041297|Cdk13|chr13|-|A3SS|17719355|17719805|17719355|17719625|17721087|17721293|NEG
ENSMUSG00000074749|Kiz|chr2|+|SE|146870765|146870846|146863706|146863869|146889020|146889666	-0.127	ENSMUSG00000074749|Kiz|chr2|+|SE|146870765|146870846|146863706|146863869|146889020|146889666|NEG
ENSMUSG00000028556|Dock7|chr4|-|SE|98993646|98993736|98992368|98992458|99001032|99001202	-0.127	ENSMUSG00000028556|Dock7|chr4|-|SE|98993646|98993736|98992368|98992458|99001032|99001202|NEG
ENSMUSG00000040481|Bptf|chr11|-|SE|107044491|107044665|107043632|107043825|107046999|107047343	-0.127	ENSMUSG00000040481|Bptf|chr11|-|SE|107044491|107044665|107043632|107043825|107046999|107047343|NEG
ENSMUSG00000024127|Prepl|chr17|-|SE|85088339|85088875|85083192|85083315|85090105|85090224	-0.127	ENSMUSG00000024127|Prepl|chr17|-|SE|85088339|85088875|85083192|85083315|85090105|85090224|NEG
ENSMUSG00000059439|Bcas3|chr11|+|SE|85354593|85354679|85353166|85353233|85354887|85354975	-0.127	ENSMUSG00000059439|Bcas3|chr11|+|SE|85354593|85354679|85353166|85353233|85354887|85354975|NEG
ENSMUSG00000002833|Hdgfl2|chr17|+|A3SS|56096820|56097016|56096847|56097016|56096204|56096276	-0.126	ENSMUSG00000002833|Hdgfl2|chr17|+|A3SS|56096820|56097016|56096847|56097016|56096204|56096276|NEG
ENSMUSG00000002668|Dennd1c|chr17|-|RI|57066731|57067116|57066731|57066942|57067048|57067116	-0.126	ENSMUSG00000002668|Dennd1c|chr17|-|RI|57066731|57067116|57066731|57066942|57067048|57067116|NEG
ENSMUSG00000027072|Prg3|chr2|+|SE|84989224|84989532|84988658|84988792|84991401|84991533	-0.126	ENSMUSG00000027072|Prg3|chr2|+|SE|84989224|84989532|84988658|84988792|84991401|84991533|NEG
ENSMUSG00000020189|Osbpl8|chr10|+|SE|111224671|111224708|111204734|111204840|111233552|111233690	-0.125	ENSMUSG00000020189|Osbpl8|chr10|+|SE|111224671|111224708|111204734|111204840|111233552|111233690|NEG
ENSMUSG00000037364|Srrt|chr5|-|A3SS|137295986|137296113|137295986|137296092|137296217|137296307	-0.125	ENSMUSG00000037364|Srrt|chr5|-|A3SS|137295986|137296113|137295986|137296092|137296217|137296307|NEG
ENSMUSG00000041890|Git2|chr5|-|MXE|114739032|114739281|114743775|114743880|114733860|114733943|114745428|114745571	-0.125	ENSMUSG00000041890|Git2|chr5|-|MXE|114739032|114739281|114743775|114743880|114733860|114733943|114745428|114745571|NEG
ENSMUSG00000068329|Htra2|chr6|-|SE|83052697|83052726|83052472|83052542|83053037|83053070	-0.125	ENSMUSG00000068329|Htra2|chr6|-|SE|83052697|83052726|83052472|83052542|83053037|83053070|NEG
ENSMUSG00000063052|Lrrc40|chr3|+|SE|158040440|158040622|158036661|158036876|158043560|158043690	-0.124	ENSMUSG00000063052|Lrrc40|chr3|+|SE|158040440|158040622|158036661|158036876|158043560|158043690|NEG
ENSMUSG00000029767|Calu|chr6|+|SE|29361559|29361753|29361293|29361487|29366039|29366206	-0.124	ENSMUSG00000029767|Calu|chr6|+|SE|29361559|29361753|29361293|29361487|29366039|29366206|NEG
ENSMUSG00000021180|Rps6ka5|chr12|-|SE|100619525|100619641|100615996|100616104|100654270|100654489	-0.124	ENSMUSG00000021180|Rps6ka5|chr12|-|SE|100619525|100619641|100615996|100616104|100654270|100654489|NEG
ENSMUSG00000038240|Pdss2|chr10|+|SE|43413514|43413547|43395560|43395692|43439798|43440602	-0.124	ENSMUSG00000038240|Pdss2|chr10|+|SE|43413514|43413547|43395560|43395692|43439798|43440602|NEG
ENSMUSG00000032311|Nrg4|chr9|-|A3SS|55226615|55226754|55226615|55226716|55227852|55227938	-0.124	ENSMUSG00000032311|Nrg4|chr9|-|A3SS|55226615|55226754|55226615|55226716|55227852|55227938|NEG
ENSMUSG00000030177|Ccdc77|chr6|-|SE|120338068|120338160|120334768|120334917|120341972|120342069	-0.124	ENSMUSG00000030177|Ccdc77|chr6|-|SE|120338068|120338160|120334768|120334917|120341972|120342069|NEG
ENSMUSG00000021596|Mctp1|chr13|+|SE|76741293|76741353|76723686|76723779|76756985|76757156	-0.124	ENSMUSG00000021596|Mctp1|chr13|+|SE|76741293|76741353|76723686|76723779|76756985|76757156|NEG
ENSMUSG00000040723|Rcsd1|chr1|-|SE|165663565|165663655|165659372|165659444|165664948|165665050	-0.123	ENSMUSG00000040723|Rcsd1|chr1|-|SE|165663565|165663655|165659372|165659444|165664948|165665050|NEG
ENSMUSG00000020634|Ubxn2a|chr12|-|SE|4891314|4891421|4885720|4885858|4894537|4894679	-0.123	ENSMUSG00000020634|Ubxn2a|chr12|-|SE|4891314|4891421|4885720|4885858|4894537|4894679|NEG
ENSMUSG00000044452|Zfp507|chr7|-|SE|35795295|35795618|35791721|35791762|35801437|35801528	-0.123	ENSMUSG00000044452|Zfp507|chr7|-|SE|35795295|35795618|35791721|35791762|35801437|35801528|NEG
ENSMUSG00000050891|Tatdn1|chr15|-|SE|58909572|58909649|58905740|58905811|58916151|58916192	-0.123	ENSMUSG00000050891|Tatdn1|chr15|-|SE|58909572|58909649|58905740|58905811|58916151|58916192|NEG
ENSMUSG00000059669|Taf1b|chr12|+|SE|24509083|24509181|24504946|24505034|24509453|24509549	-0.122	ENSMUSG00000059669|Taf1b|chr12|+|SE|24509083|24509181|24504946|24505034|24509453|24509549|NEG
ENSMUSG00000002833|Hdgfl2|chr17|+|A3SS|56096820|56097016|56096850|56097016|56096204|56096276	-0.122	ENSMUSG00000002833|Hdgfl2|chr17|+|A3SS|56096820|56097016|56096850|56097016|56096204|56096276|NEG
ENSMUSG00000074733|Zfp950|chr19|-|SE|61117624|61117727|61117142|61117288|61118226|61118350	-0.122	ENSMUSG00000074733|Zfp950|chr19|-|SE|61117624|61117727|61117142|61117288|61118226|61118350|NEG
ENSMUSG00000024073|Birc6|chr17|+|A3SS|74594321|74594453|74594363|74594453|74593088|74593249	-0.121	ENSMUSG00000024073|Birc6|chr17|+|A3SS|74594321|74594453|74594363|74594453|74593088|74593249|NEG
ENSMUSG00000053332|Gas5|chr1|+|A5SS|161036819|161037164|161036819|161036852|161037287|161037315	-0.121	ENSMUSG00000053332|Gas5|chr1|+|A5SS|161036819|161037164|161036819|161036852|161037287|161037315|NEG
ENSMUSG00000030180|Kdm5a|chr6|+|SE|120381534|120381669|120374816|120374987|120382916|120383022	-0.121	ENSMUSG00000030180|Kdm5a|chr6|+|SE|120381534|120381669|120374816|120374987|120382916|120383022|NEG
ENSMUSG00000032525|Nktr|chr9|+|RI|121727315|121729680|121727315|121727390|121729635|121729680	-0.121	ENSMUSG00000032525|Nktr|chr9|+|RI|121727315|121729680|121727315|121727390|121729635|121729680|NEG
ENSMUSG00000022884|Eif4a2|chr16|+|SE|23109119|23109259|23108718|23108851|23109984|23110153	-0.121	ENSMUSG00000022884|Eif4a2|chr16|+|SE|23109119|23109259|23108718|23108851|23109984|23110153|NEG
ENSMUSG00000045078|Rnf216|chr5|-|A3SS|143090119|143090929|143090119|143090758|143092994|143093125	-0.12	ENSMUSG00000045078|Rnf216|chr5|-|A3SS|143090119|143090929|143090119|143090758|143092994|143093125|NEG
ENSMUSG00000038346|Zfp384|chr6|+|SE|125025847|125025940|125024745|125025082|125030797|125031022	-0.12	ENSMUSG00000038346|Zfp384|chr6|+|SE|125025847|125025940|125024745|125025082|125030797|125031022|NEG
ENSMUSG00000030180|Kdm5a|chr6|+|SE|120438443|120438525|120431812|120432223|120438986|120439711	-0.12	ENSMUSG00000030180|Kdm5a|chr6|+|SE|120438443|120438525|120431812|120432223|120438986|120439711|NEG
ENSMUSG00000034940|Synrg|chr11|+|SE|83986813|83987047|83982195|83982307|83987912|83987990	-0.12	ENSMUSG00000034940|Synrg|chr11|+|SE|83986813|83987047|83982195|83982307|83987912|83987990|NEG
ENSMUSG00000024795|Kif20b|chr19|+|A3SS|34941212|34941441|34941332|34941441|34940092|34940231	-0.119	ENSMUSG00000024795|Kif20b|chr19|+|A3SS|34941212|34941441|34941332|34941441|34940092|34940231|NEG
ENSMUSG00000055541|Lair1|chr7|-|SE|4010729|4010846|4010589|4010632|4055917|4055953	-0.119	ENSMUSG00000055541|Lair1|chr7|-|SE|4010729|4010846|4010589|4010632|4055917|4055953|NEG
ENSMUSG00000035778|Ggta1|chr2|-|SE|35414218|35414284|35413325|35413427|35422179|35422268	-0.119	ENSMUSG00000035778|Ggta1|chr2|-|SE|35414218|35414284|35413325|35413427|35422179|35422268|NEG
ENSMUSG00000022641|Bbx|chr16|-|SE|50209084|50209144|50202377|50202575|50220444|50220593	-0.119	ENSMUSG00000022641|Bbx|chr16|-|SE|50209084|50209144|50202377|50202575|50220444|50220593|NEG
ENSMUSG00000031093|Dock11|chrX|+|SE|36009942|36009981|36009338|36009450|36011631|36011810	-0.118	ENSMUSG00000031093|Dock11|chrX|+|SE|36009942|36009981|36009338|36009450|36011631|36011810|NEG
ENSMUSG00000056763|Cspp1|chr1|+|SE|10085746|10085952|10083500|10083558|10088050|10088184	-0.118	ENSMUSG00000056763|Cspp1|chr1|+|SE|10085746|10085952|10083500|10083558|10088050|10088184|NEG
ENSMUSG00000032376|Usp3|chr9|-|SE|66542512|66542613|66540061|66540175|66543945|66544028	-0.117	ENSMUSG00000032376|Usp3|chr9|-|SE|66542512|66542613|66540061|66540175|66543945|66544028|NEG
ENSMUSG00000036352|Ubac1|chr2|-|SE|26005325|26005464|25998542|25999067|26006526|26006613	-0.117	ENSMUSG00000036352|Ubac1|chr2|-|SE|26005325|26005464|25998542|25999067|26006526|26006613|NEG
ENSMUSG00000022680|Pdxdc1|chr16|-|SE|13836385|13836615|13833147|13834846|13837042|13837081	-0.117	ENSMUSG00000022680|Pdxdc1|chr16|-|SE|13836385|13836615|13833147|13834846|13837042|13837081|NEG
ENSMUSG00000032316|Clk3|chr9|-|SE|57758626|57758723|57758283|57758350|57760823|57761040	-0.117	ENSMUSG00000032316|Clk3|chr9|-|SE|57758626|57758723|57758283|57758350|57760823|57761040|NEG
ENSMUSG00000062901|Klhl24|chr16|+|SE|20101991|20102054|20097541|20097671|20106662|20106768	-0.117	ENSMUSG00000062901|Klhl24|chr16|+|SE|20101991|20102054|20097541|20097671|20106662|20106768|NEG
ENSMUSG00000033352|Map2k4|chr11|-|SE|65775732|65775765|65756268|65756371|65788135|65788285	-0.117	ENSMUSG00000033352|Map2k4|chr11|-|SE|65775732|65775765|65756268|65756371|65788135|65788285|NEG
ENSMUSG00000028152|Tspan5|chr3|+|A3SS|138896788|138896914|138896852|138896914|138894347|138894518	-0.116	ENSMUSG00000028152|Tspan5|chr3|+|A3SS|138896788|138896914|138896852|138896914|138894347|138894518|NEG
ENSMUSG00000099481|Xndc1|chr7|+|SE|102069896|102069991|102065519|102065804|102071186|102071361	-0.116	ENSMUSG00000099481|Xndc1|chr7|+|SE|102069896|102069991|102065519|102065804|102071186|102071361|NEG
ENSMUSG00000007411|Mark3|chr12|+|SE|111653389|111653434|111647470|111647728|111655269|111655615	-0.116	ENSMUSG00000007411|Mark3|chr12|+|SE|111653389|111653434|111647470|111647728|111655269|111655615|NEG
ENSMUSG00000032254|Kif23|chr9|-|SE|61923904|61924216|61921018|61921246|61924631|61924811	-0.115	ENSMUSG00000032254|Kif23|chr9|-|SE|61923904|61924216|61921018|61921246|61924631|61924811|NEG
ENSMUSG00000035778|Ggta1|chr2|-|SE|35416471|35416507|35413325|35413427|35422179|35422268	-0.115	ENSMUSG00000035778|Ggta1|chr2|-|SE|35416471|35416507|35413325|35413427|35422179|35422268|NEG
ENSMUSG00000029462|Vps29|chr5|+|SE|122356793|122356805|122354384|122354476|122360012|122360204	-0.115	ENSMUSG00000029462|Vps29|chr5|+|SE|122356793|122356805|122354384|122354476|122360012|122360204|NEG
ENSMUSG00000029516|Cit|chr5|+|SE|115987687|115987732|115986893|115987063|115988155|115988236	-0.115	ENSMUSG00000029516|Cit|chr5|+|SE|115987687|115987732|115986893|115987063|115988155|115988236|NEG
ENSMUSG00000038696|Mapkap1|chr2|+|SE|34432002|34432330|34407182|34407254|34435132|34435222	-0.115	ENSMUSG00000038696|Mapkap1|chr2|+|SE|34432002|34432330|34407182|34407254|34435132|34435222|NEG
ENSMUSG00000027285|Haus2|chr2|+|SE|120613050|120613120|120612337|120612430|120615854|120615987	-0.115	ENSMUSG00000027285|Haus2|chr2|+|SE|120613050|120613120|120612337|120612430|120615854|120615987|NEG
ENSMUSG00000032624|Eml4|chr17|+|SE|83428215|83428248|83427999|83428025|83440030|83440154	-0.115	ENSMUSG00000032624|Eml4|chr17|+|SE|83428215|83428248|83427999|83428025|83440030|83440154|NEG
ENSMUSG00000020564|Atxn7l1|chr12|+|SE|33148432|33148501|33147710|33147915|33217711|33217816	-0.115	ENSMUSG00000020564|Atxn7l1|chr12|+|SE|33148432|33148501|33147710|33147915|33217711|33217816|NEG
ENSMUSG00000029782|Tmem209|chr6|-|SE|30508665|30508842|30508453|30508512|30509684|30509718	-0.115	ENSMUSG00000029782|Tmem209|chr6|-|SE|30508665|30508842|30508453|30508512|30509684|30509718|NEG
ENSMUSG00000029516|Cit|chr5|+|A3SS|115981649|115981812|115981694|115981812|115979761|115979869	-0.114	ENSMUSG00000029516|Cit|chr5|+|A3SS|115981649|115981812|115981694|115981812|115979761|115979869|NEG
ENSMUSG00000027652|Ralgapb|chr2|+|A3SS|158450176|158450310|158450188|158450310|158448319|158448449	-0.114	ENSMUSG00000027652|Ralgapb|chr2|+|A3SS|158450176|158450310|158450188|158450310|158448319|158448449|NEG
ENSMUSG00000026087|Mrpl30|chr1|+|SE|37892942|37893023|37890476|37890584|37893938|37893984	-0.113	ENSMUSG00000026087|Mrpl30|chr1|+|SE|37892942|37893023|37890476|37890584|37893938|37893984|NEG
ENSMUSG00000028034|Fubp1|chr3|+|SE|152214824|152214887|152213976|152214067|152215591|152215630	-0.113	ENSMUSG00000028034|Fubp1|chr3|+|SE|152214824|152214887|152213976|152214067|152215591|152215630|NEG
ENSMUSG00000026634|Angel2|chr1|+|SE|190932866|190933192|190928491|190928758|190937443|190937700	-0.113	ENSMUSG00000026634|Angel2|chr1|+|SE|190932866|190933192|190928491|190928758|190937443|190937700|NEG
ENSMUSG00000006498|Ptbp1|chr10|+|SE|79860116|79860194|79859780|79859955|79860823|79860969	-0.112	ENSMUSG00000006498|Ptbp1|chr10|+|SE|79860116|79860194|79859780|79859955|79860823|79860969|NEG
ENSMUSG00000021846|Peli2|chr14|+|SE|48168196|48168326|48120822|48121233|48240209|48240311	-0.112	ENSMUSG00000021846|Peli2|chr14|+|SE|48168196|48168326|48120822|48121233|48240209|48240311|NEG
ENSMUSG00000035248|Tut7|chr13|-|SE|59778751|59778815|59771560|59772859|59782017|59782343	-0.112	ENSMUSG00000035248|Tut7|chr13|-|SE|59778751|59778815|59771560|59772859|59782017|59782343|NEG
ENSMUSG00000020652|Cenpo|chr12|-|SE|4231515|4231682|4217207|4217322|4233530|4233657	-0.111	ENSMUSG00000020652|Cenpo|chr12|-|SE|4231515|4231682|4217207|4217322|4233530|4233657|NEG
ENSMUSG00000059208|Hnrnpm|chr17|-|RI|33666493|33666685|33666493|33666529|33666646|33666685	-0.111	ENSMUSG00000059208|Hnrnpm|chr17|-|RI|33666493|33666685|33666493|33666529|33666646|33666685|NEG
ENSMUSG00000046897|Zfp740|chr15|+|A3SS|102208235|102208361|102208271|102208361|102207770|102207920	-0.111	ENSMUSG00000046897|Zfp740|chr15|+|A3SS|102208235|102208361|102208271|102208361|102207770|102207920|NEG
ENSMUSG00000027615|Hps3|chr3|-|SE|20019802|20019957|20018810|20018919|20022757|20022839	-0.111	ENSMUSG00000027615|Hps3|chr3|-|SE|20019802|20019957|20018810|20018919|20022757|20022839|NEG
ENSMUSG00000040225|Prrc2c|chr1|-|SE|162674098|162674151|162670724|162673656|162676690|162676817	-0.111	ENSMUSG00000040225|Prrc2c|chr1|-|SE|162674098|162674151|162670724|162673656|162676690|162676817|NEG
ENSMUSG00000066568|Lsm14a|chr7|-|SE|34357765|34357942|34357433|34357496|34365614|34365737	-0.11	ENSMUSG00000066568|Lsm14a|chr7|-|SE|34357765|34357942|34357433|34357496|34365614|34365737|NEG
ENSMUSG00000019302|Atp6v0a1|chr11|+|A3SS|101026659|101026763|101026680|101026763|101021053|101021182	-0.11	ENSMUSG00000019302|Atp6v0a1|chr11|+|A3SS|101026659|101026763|101026680|101026763|101021053|101021182|NEG
ENSMUSG00000060950|Trmt61a|chr12|+|RI|111678104|111678962|111678104|111678161|111678602|111678962	-0.11	ENSMUSG00000060950|Trmt61a|chr12|+|RI|111678104|111678962|111678104|111678161|111678602|111678962|NEG
ENSMUSG00000038975|Rabggtb|chr3|-|A3SS|153908789|153908915|153908789|153908899|153909348|153909459	-0.11	ENSMUSG00000038975|Rabggtb|chr3|-|A3SS|153908789|153908915|153908789|153908899|153909348|153909459|NEG
ENSMUSG00000020271|Fbxw11|chr11|+|SE|32708187|32708250|32680200|32680302|32711771|32711997	-0.11	ENSMUSG00000020271|Fbxw11|chr11|+|SE|32708187|32708250|32680200|32680302|32711771|32711997|NEG
ENSMUSG00000028252|Ccnc|chr4|+|SE|21732217|21732302|21730396|21730503|21732488|21732558	-0.109	ENSMUSG00000028252|Ccnc|chr4|+|SE|21732217|21732302|21730396|21730503|21732488|21732558|NEG
ENSMUSG00000021417|Eci2|chr13|-|A3SS|34993067|34993328|34993067|34993220|34994013|34994132	-0.109	ENSMUSG00000021417|Eci2|chr13|-|A3SS|34993067|34993328|34993067|34993220|34994013|34994132|NEG
ENSMUSG00000042508|Dmtf1|chr5|-|SE|9148899|9149022|9139817|9140480|9150375|9150492	-0.109	ENSMUSG00000042508|Dmtf1|chr5|-|SE|9148899|9149022|9139817|9140480|9150375|9150492|NEG
ENSMUSG00000020528|Prpsap2|chr11|-|SE|61755409|61755462|61752866|61752933|61756194|61756345	-0.108	ENSMUSG00000020528|Prpsap2|chr11|-|SE|61755409|61755462|61752866|61752933|61756194|61756345|NEG
ENSMUSG00000039205|Ciz1|chr2|+|RI|32370863|32371408|32370863|32371101|32371248|32371408	-0.108	ENSMUSG00000039205|Ciz1|chr2|+|RI|32370863|32371408|32370863|32371101|32371248|32371408|NEG
ENSMUSG00000032089|Il10ra|chr9|-|SE|45267099|45267220|45266454|45266642|45269005|45269149	-0.108	ENSMUSG00000032089|Il10ra|chr9|-|SE|45267099|45267220|45266454|45266642|45269005|45269149|NEG
ENSMUSG00000027763|Mbnl1|chr3|+|SE|60621422|60621458|60615619|60615773|60622145|60622240	-0.107	ENSMUSG00000027763|Mbnl1|chr3|+|SE|60621422|60621458|60615619|60615773|60622145|60622240|NEG
ENSMUSG00000020472|Zkscan17|chr11|-|A3SS|59503383|59503810|59503383|59503763|59504147|59504254	-0.107	ENSMUSG00000020472|Zkscan17|chr11|-|A3SS|59503383|59503810|59503383|59503763|59504147|59504254|NEG
ENSMUSG00000066613|Zfp932|chr5|+|SE|110003352|110003452|109996531|109996633|110006943|110007070	-0.107	ENSMUSG00000066613|Zfp932|chr5|+|SE|110003352|110003452|109996531|109996633|110006943|110007070|NEG
ENSMUSG00000040848|Sft2d2|chr1|-|SE|165187968|165188054|165185007|165185089|165188247|165188334	-0.107	ENSMUSG00000040848|Sft2d2|chr1|-|SE|165187968|165188054|165185007|165185089|165188247|165188334|NEG
ENSMUSG00000036270|Edc4|chr8|+|A3SS|105889624|105889729|105889672|105889729|105889103|105889540	-0.107	ENSMUSG00000036270|Edc4|chr8|+|A3SS|105889624|105889729|105889672|105889729|105889103|105889540|NEG
ENSMUSG00000027282|Mtch2|chr2|+|SE|90852815|90852866|90849597|90849704|90853050|90853113	-0.106	ENSMUSG00000027282|Mtch2|chr2|+|SE|90852815|90852866|90849597|90849704|90853050|90853113|NEG
ENSMUSG00000042705|Commd10|chr18|+|SE|46967739|46967895|46960415|46960506|46990478|46990589	-0.106	ENSMUSG00000042705|Commd10|chr18|+|SE|46967739|46967895|46960415|46960506|46990478|46990589|NEG
ENSMUSG00000026767|Mindy3|chr2|-|MXE|12401024|12401076|12403997|12404168|12400022|12400137|12405859|12405920	-0.105	ENSMUSG00000026767|Mindy3|chr2|-|MXE|12401024|12401076|12403997|12404168|12400022|12400137|12405859|12405920|NEG
ENSMUSG00000014850|Msh3|chr13|-|SE|92353224|92353342|92351230|92351360|92354762|92354953	-0.105	ENSMUSG00000014850|Msh3|chr13|-|SE|92353224|92353342|92351230|92351360|92354762|92354953|NEG
ENSMUSG00000025899|Alkbh8|chr9|+|SE|3347803|3347908|3345780|3345876|3349419|3349490	-0.104	ENSMUSG00000025899|Alkbh8|chr9|+|SE|3347803|3347908|3345780|3345876|3349419|3349490|NEG
ENSMUSG00000036257|Pnpla8|chr12|+|SE|44304910|44305105|44299233|44299291|44307918|44308114	-0.104	ENSMUSG00000036257|Pnpla8|chr12|+|SE|44304910|44305105|44299233|44299291|44307918|44308114|NEG
ENSMUSG00000003824|Syce2|chr8|+|SE|84883430|84883584|84872701|84872832|84885934|84886123	-0.104	ENSMUSG00000003824|Syce2|chr8|+|SE|84883430|84883584|84872701|84872832|84885934|84886123|NEG
ENSMUSG00000009207|Lnpk|chr2|-|SE|74554987|74555046|74551060|74551101|74568940|74569128	-0.104	ENSMUSG00000009207|Lnpk|chr2|-|SE|74554987|74555046|74551060|74551101|74568940|74569128|NEG
ENSMUSG00000026781|Acbd5|chr2|+|SE|23075489|23075610|23069326|23069619|23078143|23078216	-0.104	ENSMUSG00000026781|Acbd5|chr2|+|SE|23075489|23075610|23069326|23069619|23078143|23078216|NEG
ENSMUSG00000021693|Kif2a|chr13|-|SE|106987952|106988075|106987268|106987369|106990037|106990092	-0.103	ENSMUSG00000021693|Kif2a|chr13|-|SE|106987952|106988075|106987268|106987369|106990037|106990092|NEG
ENSMUSG00000000827|Tpd52l2|chr2|+|SE|181502875|181502935|181501904|181502053|181508165|181508267	-0.103	ENSMUSG00000000827|Tpd52l2|chr2|+|SE|181502875|181502935|181501904|181502053|181508165|181508267|NEG
ENSMUSG00000075467|Dnlz|chr2|-|SE|26351334|26351474|26348120|26350558|26351772|26352110	-0.103	ENSMUSG00000075467|Dnlz|chr2|-|SE|26351334|26351474|26348120|26350558|26351772|26352110|NEG
ENSMUSG00000050619|Zscan29|chr2|-|SE|121169198|121169403|121166043|121166718|121169809|121170268	-0.103	ENSMUSG00000050619|Zscan29|chr2|-|SE|121169198|121169403|121166043|121166718|121169809|121170268|NEG
ENSMUSG00000052337|Immt|chr6|+|A3SS|71852729|71852867|71852762|71852867|71851771|71851880	-0.103	ENSMUSG00000052337|Immt|chr6|+|A3SS|71852729|71852867|71852762|71852867|71851771|71851880|NEG
ENSMUSG00000031229|Atrx|chrX|-|SE|105884306|105884420|105879908|105880018|105887714|105887823	-0.103	ENSMUSG00000031229|Atrx|chrX|-|SE|105884306|105884420|105879908|105880018|105887714|105887823|NEG
ENSMUSG00000004561|Mettl17|chr14|+|SE|51889146|51889217|51888741|51888836|51889527|51889635	-0.103	ENSMUSG00000004561|Mettl17|chr14|+|SE|51889146|51889217|51888741|51888836|51889527|51889635|NEG
ENSMUSG00000062627|Mysm1|chr4|-|A3SS|94968979|94969058|94968979|94969053|94970511|94970535	-0.103	ENSMUSG00000062627|Mysm1|chr4|-|A3SS|94968979|94969058|94968979|94969053|94970511|94970535|NEG
ENSMUSG00000018008|Cyth4|chr15|+|SE|78606956|78607075|78604859|78605913|78608125|78608204	-0.102	ENSMUSG00000018008|Cyth4|chr15|+|SE|78606956|78607075|78604859|78605913|78608125|78608204|NEG
ENSMUSG00000020843|Timm22|chr11|+|SE|76409641|76409838|76407142|76407442|76411126|76411199	-0.102	ENSMUSG00000020843|Timm22|chr11|+|SE|76409641|76409838|76407142|76407442|76411126|76411199|NEG
ENSMUSG00000036928|Stag3|chr5|+|SE|138297622|138297702|138296701|138297425|138297965|138298073	-0.102	ENSMUSG00000036928|Stag3|chr5|+|SE|138297622|138297702|138296701|138297425|138297965|138298073|NEG
ENSMUSG00000031229|Atrx|chrX|-|SE|105899880|105899993|105890916|105890972|105928958|105929397	-0.102	ENSMUSG00000031229|Atrx|chrX|-|SE|105899880|105899993|105890916|105890972|105928958|105929397|NEG
ENSMUSG00000034292|Traf3ip1|chr1|+|SE|91505422|91505494|91501004|91501424|91507492|91507568	-0.102	ENSMUSG00000034292|Traf3ip1|chr1|+|SE|91505422|91505494|91501004|91501424|91507492|91507568|NEG
ENSMUSG00000027206|Cops2|chr2|-|A3SS|125842621|125842732|125842621|125842711|125844809|125844935	-0.101	ENSMUSG00000027206|Cops2|chr2|-|A3SS|125842621|125842732|125842621|125842711|125844809|125844935|NEG
ENSMUSG00000030263|Lrmp|chr6|+|A5SS|145137459|145138086|145137459|145137607|145138181|145138263	-0.101	ENSMUSG00000030263|Lrmp|chr6|+|A5SS|145137459|145138086|145137459|145137607|145138181|145138263|NEG
ENSMUSG00000024013|Fgd2|chr17|+|RI|29373217|29373414|29373217|29373297|29373383|29373414	-0.101	ENSMUSG00000024013|Fgd2|chr17|+|RI|29373217|29373414|29373217|29373297|29373383|29373414|NEG
ENSMUSG00000020400|Tnip1|chr11|-|A3SS|54910786|54911571|54910786|54911497|54915496|54915587	-0.101	ENSMUSG00000020400|Tnip1|chr11|-|A3SS|54910786|54911571|54910786|54911497|54915496|54915587|NEG
ENSMUSG00000014668|Chfr|chr5|+|A3SS|110140353|110140453|110140375|110140453|110136050|110136194	-0.1	ENSMUSG00000014668|Chfr|chr5|+|A3SS|110140353|110140453|110140375|110140453|110136050|110136194|NEG
ENSMUSG00000033335|Dnm2|chr9|+|MXE|21478898|21479037|21480406|21480545|21478280|21478348|21481332|21481419	-0.1	ENSMUSG00000033335|Dnm2|chr9|+|MXE|21478898|21479037|21480406|21480545|21478280|21478348|21481332|21481419|NEG
ENSMUSG00000011257|Pabpc4|chr4|+|SE|123295749|123295836|123295201|123295273|123295929|123296057	-0.1	ENSMUSG00000011257|Pabpc4|chr4|+|SE|123295749|123295836|123295201|123295273|123295929|123296057|NEG
ENSMUSG00000024150|Mcfd2|chr17|-|SE|87258749|87258881|87257927|87258089|87265834|87265895	-0.1	ENSMUSG00000024150|Mcfd2|chr17|-|SE|87258749|87258881|87257927|87258089|87265834|87265895|NEG
ENSMUSG00000034480|Diaph2|chrX|+|SE|129825926|129825947|129821238|129821343|129902899|129903039	-0.1	ENSMUSG00000034480|Diaph2|chrX|+|SE|129825926|129825947|129821238|129821343|129902899|129903039|NEG
ENSMUSG00000092203|1110038B12Rik|chr17|-|MXE|34950697|34950847|34951884|34951925|34950240|34950475|34952135|34952173	-0.1	ENSMUSG00000092203|1110038B12Rik|chr17|-|MXE|34950697|34950847|34951884|34951925|34950240|34950475|34952135|34952173|NEG
ENSMUSG00000005312|Ubqln1|chr13|-|SE|58180821|58180905|58179552|58179668|58183181|58183324	-0.1	ENSMUSG00000005312|Ubqln1|chr13|-|SE|58180821|58180905|58179552|58179668|58183181|58183324|NEG
ENSMUSG00000029227|Fip1l1|chr5|+|SE|74585045|74585072|74572428|74572585|74587002|74587057	-0.099	ENSMUSG00000029227|Fip1l1|chr5|+|SE|74585045|74585072|74572428|74572585|74587002|74587057|NEG
ENSMUSG00000021870|Slmap|chr14|-|SE|26459409|26459460|26442574|26442634|26460041|26460210	-0.098	ENSMUSG00000021870|Slmap|chr14|-|SE|26459409|26459460|26442574|26442634|26460041|26460210|NEG
ENSMUSG00000056763|Cspp1|chr1|+|SE|10104211|10104364|10095865|10096013|10108368|10108481	-0.098	ENSMUSG00000056763|Cspp1|chr1|+|SE|10104211|10104364|10095865|10096013|10108368|10108481|NEG
ENSMUSG00000032525|Nktr|chr9|+|SE|121728577|121728685|121727315|121727390|121729635|121729680	-0.097	ENSMUSG00000032525|Nktr|chr9|+|SE|121728577|121728685|121727315|121727390|121729635|121729680|NEG
ENSMUSG00000023206|Il15ra|chr2|+|SE|11720012|11720105|11718263|11718458|11724095|11724128	-0.097	ENSMUSG00000023206|Il15ra|chr2|+|SE|11720012|11720105|11718263|11718458|11724095|11724128|NEG
ENSMUSG00000020003|Pex7|chr10|-|SE|19894724|19894802|19894249|19894358|19904562|19904713	-0.096	ENSMUSG00000020003|Pex7|chr10|-|SE|19894724|19894802|19894249|19894358|19904562|19904713|NEG
ENSMUSG00000045411|2410002F23Rik|chr7|+|SE|44247237|44247416|44246734|44246808|44248251|44248295	-0.096	ENSMUSG00000045411|2410002F23Rik|chr7|+|SE|44247237|44247416|44246734|44246808|44248251|44248295|NEG
ENSMUSG00000026199|Ankzf1|chr1|+|RI|75195062|75195712|75195062|75195256|75195568|75195712	-0.096	ENSMUSG00000026199|Ankzf1|chr1|+|RI|75195062|75195712|75195062|75195256|75195568|75195712|NEG
ENSMUSG00000055541|Lair1|chr7|-|SE|4028706|4029036|4010729|4010846|4055917|4055953	-0.096	ENSMUSG00000055541|Lair1|chr7|-|SE|4028706|4029036|4010729|4010846|4055917|4055953|NEG
ENSMUSG00000002250|Ppard|chr17|+|RI|28298276|28299034|28298276|28298479|28298583|28299034	-0.096	ENSMUSG00000002250|Ppard|chr17|+|RI|28298276|28299034|28298276|28298479|28298583|28299034|NEG
ENSMUSG00000029705|Cux1|chr5|-|A3SS|136312642|136313314|136312642|136313008|136314306|136314403	-0.095	ENSMUSG00000029705|Cux1|chr5|-|A3SS|136312642|136313314|136312642|136313008|136314306|136314403|NEG
ENSMUSG00000031753|Cog4|chr8|+|SE|110865976|110866095|110863250|110863384|110866560|110866727	-0.095	ENSMUSG00000031753|Cog4|chr8|+|SE|110865976|110866095|110863250|110863384|110866560|110866727|NEG
ENSMUSG00000029505|Ep400|chr5|-|SE|110740181|110740289|110737671|110739681|110741969|110742060	-0.095	ENSMUSG00000029505|Ep400|chr5|-|SE|110740181|110740289|110737671|110739681|110741969|110742060|NEG
ENSMUSG00000022440|C1qtnf6|chr15|-|A3SS|78523345|78525398|78523345|78525187|78527227|78527468	-0.095	ENSMUSG00000022440|C1qtnf6|chr15|-|A3SS|78523345|78525398|78523345|78525187|78527227|78527468|NEG
ENSMUSG00000042323|Pbrm1|chr14|+|SE|31045329|31045425|31044623|31044709|31046331|31046423	-0.095	ENSMUSG00000042323|Pbrm1|chr14|+|SE|31045329|31045425|31044623|31044709|31046331|31046423|NEG
ENSMUSG00000021693|Kif2a|chr13|-|SE|106988009|106988075|106987268|106987369|106990037|106990092	-0.094	ENSMUSG00000021693|Kif2a|chr13|-|SE|106988009|106988075|106987268|106987369|106990037|106990092|NEG
ENSMUSG00000022971|Ifnar2|chr16|+|SE|91385941|91386065|91384982|91385024|91387943|91388116	-0.094	ENSMUSG00000022971|Ifnar2|chr16|+|SE|91385941|91386065|91384982|91385024|91387943|91388116|NEG
ENSMUSG00000040506|Ambra1|chr2|+|RI|91772290|91773747|91772290|91772437|91772710|91773747	-0.094	ENSMUSG00000040506|Ambra1|chr2|+|RI|91772290|91773747|91772290|91772437|91772710|91773747|NEG
ENSMUSG00000029833|Trim24|chr6|+|SE|37908216|37908364|37903532|37903651|37915164|37915297	-0.094	ENSMUSG00000029833|Trim24|chr6|+|SE|37908216|37908364|37903532|37903651|37915164|37915297|NEG
ENSMUSG00000027615|Hps3|chr3|-|SE|20030558|20030805|20030313|20030409|20035048|20035302	-0.094	ENSMUSG00000027615|Hps3|chr3|-|SE|20030558|20030805|20030313|20030409|20035048|20035302|NEG
ENSMUSG00000039242|B3galnt2|chr13|+|SE|13975437|13975634|13970766|13970867|13980600|13980696	-0.093	ENSMUSG00000039242|B3galnt2|chr13|+|SE|13975437|13975634|13970766|13970867|13980600|13980696|NEG
ENSMUSG00000032212|Sltm|chr9|+|SE|70583931|70584112|70581300|70581464|70584752|70584877	-0.093	ENSMUSG00000032212|Sltm|chr9|+|SE|70583931|70584112|70581300|70581464|70584752|70584877|NEG
ENSMUSG00000054792|Klhl18|chr9|-|SE|110450719|110450860|110446673|110446872|110455356|110455487	-0.093	ENSMUSG00000054792|Klhl18|chr9|-|SE|110450719|110450860|110446673|110446872|110455356|110455487|NEG
ENSMUSG00000017802|Retreg3|chr11|-|SE|101102882|101103009|101102005|101102090|101103889|101103920	-0.093	ENSMUSG00000017802|Retreg3|chr11|-|SE|101102882|101103009|101102005|101102090|101103889|101103920|NEG
ENSMUSG00000053205|Styx|chr14|+|SE|45356712|45356766|45354945|45354978|45359258|45359356	-0.092	ENSMUSG00000053205|Styx|chr14|+|SE|45356712|45356766|45354945|45354978|45359258|45359356|NEG
ENSMUSG00000020590|Snx13|chr12|+|A3SS|35119732|35119905|35119765|35119905|35112434|35112504	-0.092	ENSMUSG00000020590|Snx13|chr12|+|A3SS|35119732|35119905|35119765|35119905|35112434|35112504|NEG
ENSMUSG00000029062|Cdk11b|chr4|+|SE|155625726|155625773|155625530|155625654|155626773|155626889	-0.092	ENSMUSG00000029062|Cdk11b|chr4|+|SE|155625726|155625773|155625530|155625654|155626773|155626889|NEG
ENSMUSG00000090083|Rnf8|chr17|+|RI|29626505|29627249|29626505|29626842|29626946|29627249	-0.091	ENSMUSG00000090083|Rnf8|chr17|+|RI|29626505|29627249|29626505|29626842|29626946|29627249|NEG
ENSMUSG00000013787|Ehmt2|chr17|+|A3SS|34905609|34906058|34905909|34906058|34905341|34905456	-0.091	ENSMUSG00000013787|Ehmt2|chr17|+|A3SS|34905609|34906058|34905909|34906058|34905341|34905456|NEG
ENSMUSG00000039242|B3galnt2|chr13|+|MXE|13975437|13975634|13980600|13980696|13970766|13970867|13987352|13987463	-0.091	ENSMUSG00000039242|B3galnt2|chr13|+|MXE|13975437|13975634|13980600|13980696|13970766|13970867|13987352|13987463|NEG
ENSMUSG00000039887|Alg14|chr3|+|SE|121298588|121298758|121291797|121291983|121320079|121320197	-0.091	ENSMUSG00000039887|Alg14|chr3|+|SE|121298588|121298758|121291797|121291983|121320079|121320197|NEG
ENSMUSG00000031387|Renbp|chrX|-|A5SS|73930186|73930262|73930228|73930262|73930004|73930080	-0.091	ENSMUSG00000031387|Renbp|chrX|-|A5SS|73930186|73930262|73930228|73930262|73930004|73930080|NEG
ENSMUSG00000040785|Ttc3|chr16|+|SE|94429358|94429685|94427790|94427927|94431787|94432039	-0.09	ENSMUSG00000040785|Ttc3|chr16|+|SE|94429358|94429685|94427790|94427927|94431787|94432039|NEG
ENSMUSG00000021124|Vti1b|chr12|-|SE|79166350|79166409|79164947|79165139|79172219|79172667	-0.09	ENSMUSG00000021124|Vti1b|chr12|-|SE|79166350|79166409|79164947|79165139|79172219|79172667|NEG
ENSMUSG00000063108|Zfp26|chr9|-|SE|20442179|20442265|20441328|20441455|20444258|20444367	-0.09	ENSMUSG00000063108|Zfp26|chr9|-|SE|20442179|20442265|20441328|20441455|20444258|20444367|NEG
ENSMUSG00000031229|Atrx|chrX|-|SE|105884306|105884420|105879908|105880015|105887714|105887823	-0.09	ENSMUSG00000031229|Atrx|chrX|-|SE|105884306|105884420|105879908|105880015|105887714|105887823|NEG
ENSMUSG00000029062|Cdk11b|chr4|+|A5SS|155625530|155625773|155625530|155625654|155626773|155626889	-0.09	ENSMUSG00000029062|Cdk11b|chr4|+|A5SS|155625530|155625773|155625530|155625654|155626773|155626889|NEG
ENSMUSG00000013787|Ehmt2|chr17|+|SE|34905609|34905711|34905341|34905456|34905909|34906058	-0.09	ENSMUSG00000013787|Ehmt2|chr17|+|SE|34905609|34905711|34905341|34905456|34905909|34906058|NEG
ENSMUSG00000039850|Endov|chr11|+|SE|119499845|119499885|119499510|119499661|119500590|119500703	-0.09	ENSMUSG00000039850|Endov|chr11|+|SE|119499845|119499885|119499510|119499661|119500590|119500703|NEG
ENSMUSG00000021144|Mta1|chr12|+|SE|113133540|113133576|113133184|113133337|113135796|113135828	-0.089	ENSMUSG00000021144|Mta1|chr12|+|SE|113133540|113133576|113133184|113133337|113135796|113135828|NEG
ENSMUSG00000021033|Gstz1|chr12|+|SE|87159077|87159145|87157892|87157944|87159639|87159720	-0.089	ENSMUSG00000021033|Gstz1|chr12|+|SE|87159077|87159145|87157892|87157944|87159639|87159720|NEG
ENSMUSG00000069135|Fgfr1op|chr17|+|SE|8192184|8192281|8191397|8191437|8194520|8196475	-0.089	ENSMUSG00000069135|Fgfr1op|chr17|+|SE|8192184|8192281|8191397|8191437|8194520|8196475|NEG
ENSMUSG00000030279|C2cd5|chr6|-|SE|143020323|143020374|143017882|143018073|143029159|143029246	-0.089	ENSMUSG00000030279|C2cd5|chr6|-|SE|143020323|143020374|143017882|143018073|143029159|143029246|NEG
ENSMUSG00000020594|Pum2|chr12|+|A3SS|8718987|8719113|8719002|8719113|8713843|8713937	-0.089	ENSMUSG00000020594|Pum2|chr12|+|A3SS|8718987|8719113|8719002|8719113|8713843|8713937|NEG
ENSMUSG00000018501|Ncor1|chr11|-|SE|62359760|62359934|62358854|62359015|62366963|62367159	-0.089	ENSMUSG00000018501|Ncor1|chr11|-|SE|62359760|62359934|62358854|62359015|62366963|62367159|NEG
ENSMUSG00000020859|Spag9|chr11|+|SE|94113262|94113301|94112032|94112146|94114172|94114349	-0.088	ENSMUSG00000020859|Spag9|chr11|+|SE|94113262|94113301|94112032|94112146|94114172|94114349|NEG
ENSMUSG00000021357|Exoc2|chr13|-|SE|30905652|30905755|30900784|30900903|30906502|30906584	-0.088	ENSMUSG00000021357|Exoc2|chr13|-|SE|30905652|30905755|30900784|30900903|30906502|30906584|NEG
ENSMUSG00000027104|Atf2|chr2|-|SE|73880284|73880381|73873273|73873745|73892474|73892530	-0.088	ENSMUSG00000027104|Atf2|chr2|-|SE|73880284|73880381|73873273|73873745|73892474|73892530|NEG
ENSMUSG00000028207|Asph|chr4|-|SE|9598732|9598780|9598268|9598301|9601306|9601363	-0.088	ENSMUSG00000028207|Asph|chr4|-|SE|9598732|9598780|9598268|9598301|9601306|9601363|NEG
ENSMUSG00000041966|Dcaf17|chr2|+|SE|71078473|71078579|71078059|71078164|71081910|71082053	-0.088	ENSMUSG00000041966|Dcaf17|chr2|+|SE|71078473|71078579|71078059|71078164|71081910|71082053|NEG
ENSMUSG00000045962|Wnk1|chr6|-|SE|119944700|119944784|119943805|119943866|119946236|119946320	-0.088	ENSMUSG00000045962|Wnk1|chr6|-|SE|119944700|119944784|119943805|119943866|119946236|119946320|NEG
ENSMUSG00000030177|Ccdc77|chr6|-|SE|120331811|120332031|120329333|120329459|120334768|120334917	-0.088	ENSMUSG00000030177|Ccdc77|chr6|-|SE|120331811|120332031|120329333|120329459|120334768|120334917|NEG
ENSMUSG00000037426|Depdc5|chr5|+|SE|32886978|32887048|32878627|32878677|32893374|32893453	-0.088	ENSMUSG00000037426|Depdc5|chr5|+|SE|32886978|32887048|32878627|32878677|32893374|32893453|NEG
ENSMUSG00000032280|Tle3|chr9|+|SE|61403451|61403468|61401852|61402057|61407353|61407439	-0.087	ENSMUSG00000032280|Tle3|chr9|+|SE|61403451|61403468|61401852|61402057|61407353|61407439|NEG
ENSMUSG00000038005|Hpf1|chr8|+|SE|60895460|60895650|60893700|60893860|60896737|60896836	-0.087	ENSMUSG00000038005|Hpf1|chr8|+|SE|60895460|60895650|60893700|60893860|60896737|60896836|NEG
ENSMUSG00000041718|Alg13|chrX|+|A3SS|144319898|144320061|144320002|144320061|144318022|144318121	-0.087	ENSMUSG00000041718|Alg13|chrX|+|A3SS|144319898|144320061|144320002|144320061|144318022|144318121|NEG
ENSMUSG00000047534|Mis18bp1|chr12|-|SE|65152687|65152830|65148721|65149550|65153805|65153893	-0.087	ENSMUSG00000047534|Mis18bp1|chr12|-|SE|65152687|65152830|65148721|65149550|65153805|65153893|NEG
ENSMUSG00000023048|Prr13|chr15|+|SE|102459463|102459581|102459174|102459255|102460107|102460146	-0.087	ENSMUSG00000023048|Prr13|chr15|+|SE|102459463|102459581|102459174|102459255|102460107|102460146|NEG
ENSMUSG00000022515|Anks3|chr16|-|SE|4956549|4956619|4955857|4955939|4957640|4957762	-0.087	ENSMUSG00000022515|Anks3|chr16|-|SE|4956549|4956619|4955857|4955939|4957640|4957762|NEG
ENSMUSG00000030102|Itpr1|chr6|+|SE|108431460|108431496|108417888|108418000|108432645|108432696	-0.087	ENSMUSG00000030102|Itpr1|chr6|+|SE|108431460|108431496|108417888|108418000|108432645|108432696|NEG
ENSMUSG00000073423|Zfp414|chr17|+|SE|33629621|33629698|33629089|33629216|33629796|33630079	-0.086	ENSMUSG00000073423|Zfp414|chr17|+|SE|33629621|33629698|33629089|33629216|33629796|33630079|NEG
ENSMUSG00000014873|Surf2|chr2|+|A3SS|26918872|26919055|26918928|26919055|26917427|26917531	-0.086	ENSMUSG00000014873|Surf2|chr2|+|A3SS|26918872|26919055|26918928|26919055|26917427|26917531|NEG
ENSMUSG00000027667|Zfp639|chr3|+|SE|32515283|32515352|32514383|32514454|32517028|32517139	-0.086	ENSMUSG00000027667|Zfp639|chr3|+|SE|32515283|32515352|32514383|32514454|32517028|32517139|NEG
ENSMUSG00000036371|Serbp1|chr6|+|A3SS|67272818|67272938|67272863|67272938|67272138|67272228	-0.085	ENSMUSG00000036371|Serbp1|chr6|+|A3SS|67272818|67272938|67272863|67272938|67272138|67272228|NEG
ENSMUSG00000030263|Lrmp|chr6|+|SE|145138045|145138086|145137459|145137607|145138181|145138263	-0.085	ENSMUSG00000030263|Lrmp|chr6|+|SE|145138045|145138086|145137459|145137607|145138181|145138263|NEG
ENSMUSG00000010608|Rbm25|chr12|+|SE|83642401|83642519|83632252|83632417|83642628|83642698	-0.085	ENSMUSG00000010608|Rbm25|chr12|+|SE|83642401|83642519|83632252|83632417|83642628|83642698|NEG
ENSMUSG00000030199|Etv6|chr6|+|SE|134066306|134066465|134035699|134036138|134137284|134137417	-0.084	ENSMUSG00000030199|Etv6|chr6|+|SE|134066306|134066465|134035699|134036138|134137284|134137417|NEG
ENSMUSG00000033808|Tmem87a|chr2|-|MXE|120373910|120373979|120374487|120374559|120371523|120371632|120375418|120375512	-0.084	ENSMUSG00000033808|Tmem87a|chr2|-|MXE|120373910|120373979|120374487|120374559|120371523|120371632|120375418|120375512|NEG
ENSMUSG00000021905|Dph3|chr14|-|SE|32084906|32084981|32080568|32083246|32085409|32085609	-0.083	ENSMUSG00000021905|Dph3|chr14|-|SE|32084906|32084981|32080568|32083246|32085409|32085609|NEG
ENSMUSG00000020541|Tom1l1|chr11|-|SE|90672832|90672937|90671083|90671200|90673663|90673786	-0.083	ENSMUSG00000020541|Tom1l1|chr11|-|SE|90672832|90672937|90671083|90671200|90673663|90673786|NEG
ENSMUSG00000020166|Cnot2|chr10|-|SE|116549032|116549175|116527826|116527949|116581452|116581465	-0.083	ENSMUSG00000020166|Cnot2|chr10|-|SE|116549032|116549175|116527826|116527949|116581452|116581465|NEG
ENSMUSG00000021824|Ap3m1|chr14|-|SE|21044652|21044824|21040952|21041090|21045487|21045763	-0.083	ENSMUSG00000021824|Ap3m1|chr14|-|SE|21044652|21044824|21040952|21041090|21045487|21045763|NEG
ENSMUSG00000032468|Armc8|chr9|-|SE|99551542|99551619|99537687|99537759|99568601|99568649	-0.083	ENSMUSG00000032468|Armc8|chr9|-|SE|99551542|99551619|99537687|99537759|99568601|99568649|NEG
ENSMUSG00000039285|Azi2|chr9|+|SE|118059619|118059666|118059056|118059175|118061713|118062489	-0.083	ENSMUSG00000039285|Azi2|chr9|+|SE|118059619|118059666|118059056|118059175|118061713|118062489|NEG
ENSMUSG00000044150|Bclaf3|chrX|+|SE|159566427|159566542|159559837|159559953|159567918|159568014	-0.083	ENSMUSG00000044150|Bclaf3|chrX|+|SE|159566427|159566542|159559837|159559953|159567918|159568014|NEG
ENSMUSG00000046230|Vps13a|chr19|-|SE|16744785|16744957|16742995|16743058|16745660|16745767	-0.081	ENSMUSG00000046230|Vps13a|chr19|-|SE|16744785|16744957|16742995|16743058|16745660|16745767|NEG
ENSMUSG00000051235|Gen1|chr12|-|A3SS|11260881|11261068|11260881|11261003|11262406|11262593	-0.081	ENSMUSG00000051235|Gen1|chr12|-|A3SS|11260881|11261068|11260881|11261003|11262406|11262593|NEG
ENSMUSG00000014668|Chfr|chr5|+|SE|110144771|110144987|110144590|110144650|110146469|110146547	-0.08	ENSMUSG00000014668|Chfr|chr5|+|SE|110144771|110144987|110144590|110144650|110146469|110146547|NEG
ENSMUSG00000064215|Ifi27|chr12|+|SE|103437675|103437705|103436562|103436682|103439400|103439562	-0.08	ENSMUSG00000064215|Ifi27|chr12|+|SE|103437675|103437705|103436562|103436682|103439400|103439562|NEG
ENSMUSG00000006763|Saal1|chr7|-|A3SS|46702401|46702517|46702401|46702492|46702620|46702680	-0.08	ENSMUSG00000006763|Saal1|chr7|-|A3SS|46702401|46702517|46702401|46702492|46702620|46702680|NEG
ENSMUSG00000053332|Gas5|chr1|+|RI|161036819|161037315|161036819|161036852|161037287|161037315	-0.08	ENSMUSG00000053332|Gas5|chr1|+|RI|161036819|161037315|161036819|161036852|161037287|161037315|NEG
ENSMUSG00000020590|Snx13|chr12|+|SE|35092824|35092913|35091568|35091670|35098229|35098313	-0.08	ENSMUSG00000020590|Snx13|chr12|+|SE|35092824|35092913|35091568|35091670|35098229|35098313|NEG
ENSMUSG00000022359|Wdyhv1|chr15|+|SE|58152596|58152745|58150605|58150656|58153579|58153704	-0.08	ENSMUSG00000022359|Wdyhv1|chr15|+|SE|58152596|58152745|58150605|58150656|58153579|58153704|NEG
ENSMUSG00000042790|Rnf214|chr9|-|A5SS|45899745|45900256|45900210|45900256|45898431|45898491	-0.08	ENSMUSG00000042790|Rnf214|chr9|-|A5SS|45899745|45900256|45900210|45900256|45898431|45898491|NEG
ENSMUSG00000025958|Creb1|chr1|+|SE|64561752|64561865|64558502|64558649|64566216|64566317	-0.08	ENSMUSG00000025958|Creb1|chr1|+|SE|64561752|64561865|64558502|64558649|64566216|64566317|NEG
ENSMUSG00000037514|Pank2|chr2|+|SE|131282591|131282768|131274184|131274263|131287473|131287597	-0.08	ENSMUSG00000037514|Pank2|chr2|+|SE|131282591|131282768|131274184|131274263|131287473|131287597|NEG
ENSMUSG00000029416|Slc15a4|chr5|-|A3SS|127603780|127603851|127603780|127603798|127604110|127604188	-0.079	ENSMUSG00000029416|Slc15a4|chr5|-|A3SS|127603780|127603851|127603780|127603798|127604110|127604188|NEG
ENSMUSG00000083844|Ube2d-ps|chr11|+|SE|5765508|5765571|5762128|5762240|5780205|5781876	-0.079	ENSMUSG00000083844|Ube2d-ps|chr11|+|SE|5765508|5765571|5762128|5762240|5780205|5781876|NEG
ENSMUSG00000059890|Ube4a|chr9|-|SE|44963336|44963432|44959978|44960139|44965484|44965549	-0.079	ENSMUSG00000059890|Ube4a|chr9|-|SE|44963336|44963432|44959978|44960139|44965484|44965549|NEG
ENSMUSG00000027708|Dcun1d1|chr3|-|SE|35916219|35916350|35897792|35897875|35919000|35919169	-0.078	ENSMUSG00000027708|Dcun1d1|chr3|-|SE|35916219|35916350|35897792|35897875|35919000|35919169|NEG
ENSMUSG00000062939|Stat4|chr1|+|SE|52011782|52011911|52008242|52008728|52013789|52013934	-0.078	ENSMUSG00000062939|Stat4|chr1|+|SE|52011782|52011911|52008242|52008728|52013789|52013934|NEG
ENSMUSG00000040842|Szrd1|chr4|-|SE|141120323|141120373|141118526|141118781|141139691|141139727	-0.078	ENSMUSG00000040842|Szrd1|chr4|-|SE|141120323|141120373|141118526|141118781|141139691|141139727|NEG
ENSMUSG00000022106|Rcbtb2|chr14|+|SE|73151532|73151615|73142706|73143188|73154314|73154408	-0.078	ENSMUSG00000022106|Rcbtb2|chr14|+|SE|73151532|73151615|73142706|73143188|73154314|73154408|NEG
ENSMUSG00000029782|Tmem209|chr6|-|SE|30508665|30508802|30506785|30508512|30509684|30509715	-0.078	ENSMUSG00000029782|Tmem209|chr6|-|SE|30508665|30508802|30506785|30508512|30509684|30509715|NEG
ENSMUSG00000052760|A630001G21Rik|chr1|-|A3SS|85723097|85723387|85723097|85723181|85725120|85725289	-0.077	ENSMUSG00000052760|A630001G21Rik|chr1|-|A3SS|85723097|85723387|85723097|85723181|85725120|85725289|NEG
ENSMUSG00000046006|Gapt|chr13|-|SE|110354938|110355003|110352615|110354515|110357083|110357187	-0.077	ENSMUSG00000046006|Gapt|chr13|-|SE|110354938|110355003|110352615|110354515|110357083|110357187|NEG
ENSMUSG00000018322|Tomm34|chr2|-|SE|164058665|164058813|164054700|164054827|164060838|164061008	-0.077	ENSMUSG00000018322|Tomm34|chr2|-|SE|164058665|164058813|164054700|164054827|164060838|164061008|NEG
ENSMUSG00000036948|BC037034|chr5|-|SE|138261552|138261716|138260834|138260989|138261801|138261884	-0.077	ENSMUSG00000036948|BC037034|chr5|-|SE|138261552|138261716|138260834|138260989|138261801|138261884|NEG
ENSMUSG00000030189|Ybx3|chr6|-|SE|131375973|131376180|131370322|131370414|131379357|131379480	-0.076	ENSMUSG00000030189|Ybx3|chr6|-|SE|131375973|131376180|131370322|131370414|131379357|131379480|NEG
ENSMUSG00000022364|Tbc1d31|chr15|+|SE|57919930|57920046|57915969|57916116|57922956|57923135	-0.076	ENSMUSG00000022364|Tbc1d31|chr15|+|SE|57919930|57920046|57915969|57916116|57922956|57923135|NEG
ENSMUSG00000027620|Rbm39|chr2|-|SE|156178879|156178952|156177160|156177385|156179176|156179240	-0.076	ENSMUSG00000027620|Rbm39|chr2|-|SE|156178879|156178952|156177160|156177385|156179176|156179240|NEG
ENSMUSG00000030741|Spns1|chr7|-|A3SS|126373921|126374073|126373921|126373973|126375066|126375203	-0.076	ENSMUSG00000030741|Spns1|chr7|-|A3SS|126373921|126374073|126373921|126373973|126375066|126375203|NEG
ENSMUSG00000026245|Farsb|chr1|-|A3SS|78479956|78480111|78479956|78480013|78482307|78482363	-0.075	ENSMUSG00000026245|Farsb|chr1|-|A3SS|78479956|78480111|78479956|78480013|78482307|78482363|NEG
ENSMUSG00000062115|Rai1|chr11|+|SE|60185095|60190622|60140081|60140370|60193938|60194032	-0.075	ENSMUSG00000062115|Rai1|chr11|+|SE|60185095|60190622|60140081|60140370|60193938|60194032|NEG
ENSMUSG00000031505|Naxd|chr8|+|SE|11511876|11511997|11510226|11510347|11512894|11513287	-0.075	ENSMUSG00000031505|Naxd|chr8|+|SE|11511876|11511997|11510226|11510347|11512894|11513287|NEG
ENSMUSG00000068823|Csde1|chr3|+|SE|103040440|103040533|103039932|103040042|103041144|103041242	-0.075	ENSMUSG00000068823|Csde1|chr3|+|SE|103040440|103040533|103039932|103040042|103041144|103041242|NEG
ENSMUSG00000014075|Tctex1d2|chr16|+|SE|32425240|32425310|32422819|32422953|32426857|32426921	-0.075	ENSMUSG00000014075|Tctex1d2|chr16|+|SE|32425240|32425310|32422819|32422953|32426857|32426921|NEG
ENSMUSG00000020694|Tlk2|chr11|+|SE|105240360|105240456|105221185|105221353|105241568|105241661	-0.075	ENSMUSG00000020694|Tlk2|chr11|+|SE|105240360|105240456|105221185|105221353|105241568|105241661|NEG
ENSMUSG00000027366|Sppl2a|chr2|-|SE|126913299|126913353|126912642|126912745|126913531|126913588	-0.074	ENSMUSG00000027366|Sppl2a|chr2|-|SE|126913299|126913353|126912642|126912745|126913531|126913588|NEG
ENSMUSG00000027639|Samhd1|chr2|-|SE|157101320|157101443|157099400|157099503|157101720|157101858	-0.074	ENSMUSG00000027639|Samhd1|chr2|-|SE|157101320|157101443|157099400|157099503|157101720|157101858|NEG
ENSMUSG00000023051|Tarbp2|chr15|+|SE|102519121|102519291|102518191|102518602|102521120|102521213	-0.074	ENSMUSG00000023051|Tarbp2|chr15|+|SE|102519121|102519291|102518191|102518602|102521120|102521213|NEG
ENSMUSG00000005506|Celf1|chr2|+|SE|90954288|90954341|90940396|90940641|90998579|90998767	-0.074	ENSMUSG00000005506|Celf1|chr2|+|SE|90954288|90954341|90940396|90940641|90998579|90998767|NEG
ENSMUSG00000060261|Gtf2i|chr5|-|SE|134274538|134274595|134266542|134266656|134279436|134279514	-0.073	ENSMUSG00000060261|Gtf2i|chr5|-|SE|134274538|134274595|134266542|134266656|134279436|134279514|NEG
ENSMUSG00000008398|Elk3|chr10|-|RI|93264879|93265680|93264879|93265010|93265336|93265680	-0.073	ENSMUSG00000008398|Elk3|chr10|-|RI|93264879|93265680|93264879|93265010|93265336|93265680|NEG
ENSMUSG00000020594|Pum2|chr12|+|A3SS|8718987|8719113|8719005|8719113|8713843|8713937	-0.073	ENSMUSG00000020594|Pum2|chr12|+|A3SS|8718987|8719113|8719005|8719113|8713843|8713937|NEG
ENSMUSG00000025958|Creb1|chr1|+|SE|64550848|64550970|64532808|64533020|64558502|64558649	-0.073	ENSMUSG00000025958|Creb1|chr1|+|SE|64550848|64550970|64532808|64533020|64558502|64558649|NEG
ENSMUSG00000032312|Csk|chr9|-|SE|57633994|57634045|57631366|57631443|57644994|57645109	-0.073	ENSMUSG00000032312|Csk|chr9|-|SE|57633994|57634045|57631366|57631443|57644994|57645109|NEG
ENSMUSG00000021952|Xpo4|chr14|-|SE|57643334|57643489|57641799|57643223|57648418|57648524	-0.073	ENSMUSG00000021952|Xpo4|chr14|-|SE|57643334|57643489|57641799|57643223|57648418|57648524|NEG
ENSMUSG00000057738|Sptan1|chr2|+|SE|30014157|30014172|30013675|30013838|30015588|30015720	-0.072	ENSMUSG00000057738|Sptan1|chr2|+|SE|30014157|30014172|30013675|30013838|30015588|30015720|NEG
ENSMUSG00000021115|Vrk1|chr12|+|SE|106073618|106073678|106070524|106070615|106075006|106075200	-0.072	ENSMUSG00000021115|Vrk1|chr12|+|SE|106073618|106073678|106070524|106070615|106075006|106075200|NEG
ENSMUSG00000054400|Cklf|chr8|+|SE|104261473|104261569|104257284|104257443|104263270|104263447	-0.072	ENSMUSG00000054400|Cklf|chr8|+|SE|104261473|104261569|104257284|104257443|104263270|104263447|NEG
ENSMUSG00000078919|Dpm1|chr2|-|A3SS|168211365|168211480|168211365|168211427|168212959|168213028	-0.071	ENSMUSG00000078919|Dpm1|chr2|-|A3SS|168211365|168211480|168211365|168211427|168212959|168213028|NEG
ENSMUSG00000026740|Dnajc1|chr2|-|SE|18316357|18316404|18308783|18308949|18316898|18317000	-0.071	ENSMUSG00000026740|Dnajc1|chr2|-|SE|18316357|18316404|18308783|18308949|18316898|18317000|NEG
ENSMUSG00000013033|Adgrl1|chr8|+|SE|83937915|83937933|83937648|83937777|83938349|83939987	-0.071	ENSMUSG00000013033|Adgrl1|chr8|+|SE|83937915|83937933|83937648|83937777|83938349|83939987|NEG
ENSMUSG00000058835|Abi1|chr2|-|SE|22963213|22963228|22962400|22962501|22971082|22971259	-0.071	ENSMUSG00000058835|Abi1|chr2|-|SE|22963213|22963228|22962400|22962501|22971082|22971259|NEG
ENSMUSG00000021893|Capn7|chr14|+|A5SS|31360124|31361245|31360124|31360245|31363478|31363623	-0.071	ENSMUSG00000021893|Capn7|chr14|+|A5SS|31360124|31361245|31360124|31360245|31363478|31363623|NEG
ENSMUSG00000043587|Pxylp1|chr9|-|SE|96883534|96883632|96856367|96856499|96889358|96889433	-0.071	ENSMUSG00000043587|Pxylp1|chr9|-|SE|96883534|96883632|96856367|96856499|96889358|96889433|NEG
ENSMUSG00000038886|Man2a2|chr7|-|A3SS|80363153|80363336|80363153|80363238|80363466|80363669	-0.071	ENSMUSG00000038886|Man2a2|chr7|-|A3SS|80363153|80363336|80363153|80363238|80363466|80363669|NEG
ENSMUSG00000012609|Ttll5|chr12|+|A3SS|85918930|85919237|85918972|85919237|85917674|85917832	-0.071	ENSMUSG00000012609|Ttll5|chr12|+|A3SS|85918930|85919237|85918972|85919237|85917674|85917832|NEG
ENSMUSG00000039887|Alg14|chr3|+|SE|121298603|121298758|121291772|121291983|121320079|121320211	-0.071	ENSMUSG00000039887|Alg14|chr3|+|SE|121298603|121298758|121291772|121291983|121320079|121320211|NEG
ENSMUSG00000024182|Axin1|chr17|+|SE|26192515|26192623|26189985|26190231|26193938|26194106	-0.07	ENSMUSG00000024182|Axin1|chr17|+|SE|26192515|26192623|26189985|26190231|26193938|26194106|NEG
ENSMUSG00000037608|Bclaf1|chr10|+|SE|20334498|20334645|20333253|20333572|20339708|20339921	-0.07	ENSMUSG00000037608|Bclaf1|chr10|+|SE|20334498|20334645|20333253|20333572|20339708|20339921|NEG
ENSMUSG00000023991|Foxp4|chr17|-|A3SS|47875519|47875724|47875519|47875688|47875839|47875923	-0.07	ENSMUSG00000023991|Foxp4|chr17|-|A3SS|47875519|47875724|47875519|47875688|47875839|47875923|NEG
ENSMUSG00000015889|Lta4h|chr10|+|SE|93482249|93482332|93480690|93480786|93482961|93483001	-0.069	ENSMUSG00000015889|Lta4h|chr10|+|SE|93482249|93482332|93480690|93480786|93482961|93483001|NEG
ENSMUSG00000022892|App|chr16|-|SE|85040250|85040307|85030231|85030365|85043575|85043743	-0.069	ENSMUSG00000022892|App|chr16|-|SE|85040250|85040307|85030231|85030365|85043575|85043743|NEG
ENSMUSG00000005506|Celf1|chr2|+|A3SS|91006619|91006695|91006631|91006695|91004700|91004862	-0.069	ENSMUSG00000005506|Celf1|chr2|+|A3SS|91006619|91006695|91006631|91006695|91004700|91004862|NEG
ENSMUSG00000021930|Spryd7|chr14|-|SE|61540136|61540239|61531992|61535241|61545681|61545848	-0.069	ENSMUSG00000021930|Spryd7|chr14|-|SE|61540136|61540239|61531992|61535241|61545681|61545848|NEG
ENSMUSG00000028277|Ube2j1|chr4|+|SE|33045079|33045199|33043856|33043986|33049681|33052363	-0.069	ENSMUSG00000028277|Ube2j1|chr4|+|SE|33045079|33045199|33043856|33043986|33049681|33052363|NEG
ENSMUSG00000035601|Trmt10b|chr4|+|SE|45299746|45299897|45297154|45297195|45300416|45300627	-0.069	ENSMUSG00000035601|Trmt10b|chr4|+|SE|45299746|45299897|45297154|45297195|45300416|45300627|NEG
ENSMUSG00000029472|Anapc5|chr5|-|A3SS|122800450|122800632|122800450|122800608|122802129|122802219	-0.068	ENSMUSG00000029472|Anapc5|chr5|-|A3SS|122800450|122800632|122800450|122800608|122802129|122802219|NEG
ENSMUSG00000031422|Morf4l2|chrX|-|SE|136735545|136735622|136732941|136734501|136739804|136739894	-0.068	ENSMUSG00000031422|Morf4l2|chrX|-|SE|136735545|136735622|136732941|136734501|136739804|136739894|NEG
ENSMUSG00000031796|Cfap20|chr8|-|SE|95424616|95424696|95422782|95422894|95434487|95434601	-0.068	ENSMUSG00000031796|Cfap20|chr8|-|SE|95424616|95424696|95422782|95422894|95434487|95434601|NEG
ENSMUSG00000039997|Ifi203|chr1|-|SE|173937741|173938026|173936517|173936639|173942229|173942294	-0.068	ENSMUSG00000039997|Ifi203|chr1|-|SE|173937741|173938026|173936517|173936639|173942229|173942294|NEG
ENSMUSG00000022674|Ube2v2|chr16|-|SE|15577014|15577140|15552676|15556543|15581058|15581207	-0.068	ENSMUSG00000022674|Ube2v2|chr16|-|SE|15577014|15577140|15552676|15556543|15581058|15581207|NEG
ENSMUSG00000032480|Dhx30|chr9|-|A3SS|110115035|110115211|110115035|110115161|110115490|110115582	-0.068	ENSMUSG00000032480|Dhx30|chr9|-|A3SS|110115035|110115211|110115035|110115161|110115490|110115582|NEG
ENSMUSG00000092203|1110038B12Rik|chr17|-|SE|34951884|34951925|34950697|34950847|34952135|34952173	-0.067	ENSMUSG00000092203|1110038B12Rik|chr17|-|SE|34951884|34951925|34950697|34950847|34952135|34952173|NEG
ENSMUSG00000028759|Hp1bp3|chr4|+|SE|138221525|138221723|138217130|138217294|138222088|138222188	-0.067	ENSMUSG00000028759|Hp1bp3|chr4|+|SE|138221525|138221723|138217130|138217294|138222088|138222188|NEG
ENSMUSG00000032212|Sltm|chr9|+|SE|70543969|70544057|70542753|70543081|70559036|70559101	-0.067	ENSMUSG00000032212|Sltm|chr9|+|SE|70543969|70544057|70542753|70543081|70559036|70559101|NEG
ENSMUSG00000037336|Mfsd2b|chr12|-|RI|4865136|4866529|4865136|4866268|4866448|4866529	-0.067	ENSMUSG00000037336|Mfsd2b|chr12|-|RI|4865136|4866529|4865136|4866268|4866448|4866529|NEG
ENSMUSG00000028034|Fubp1|chr3|+|A3SS|152232394|152234570|152234523|152234570|152231876|152232022	-0.067	ENSMUSG00000028034|Fubp1|chr3|+|A3SS|152232394|152234570|152234523|152234570|152231876|152232022|NEG
ENSMUSG00000024053|Emilin2|chr17|-|A3SS|71255118|71255247|71255118|71255214|71255979|71256012	-0.067	ENSMUSG00000024053|Emilin2|chr17|-|A3SS|71255118|71255247|71255118|71255214|71255979|71256012|NEG
ENSMUSG00000037461|Ints7|chr1|+|SE|191583178|191583325|191575741|191575951|191586523|191586661	-0.067	ENSMUSG00000037461|Ints7|chr1|+|SE|191583178|191583325|191575741|191575951|191586523|191586661|NEG
ENSMUSG00000021282|Eif5|chr12|+|SE|111539800|111539911|111539437|111539687|111540129|111540302	-0.067	ENSMUSG00000021282|Eif5|chr12|+|SE|111539800|111539911|111539437|111539687|111540129|111540302|NEG
ENSMUSG00000060216|Arrb2|chr11|+|SE|70435541|70435572|70432636|70432753|70436162|70436223	-0.066	ENSMUSG00000060216|Arrb2|chr11|+|SE|70435541|70435572|70432636|70432753|70436162|70436223|NEG
ENSMUSG00000041815|Poldip3|chr15|-|SE|83137467|83137554|83135293|83135389|83138131|83138522	-0.066	ENSMUSG00000041815|Poldip3|chr15|-|SE|83137467|83137554|83135293|83135389|83138131|83138522|NEG
ENSMUSG00000031767|Nudt7|chr8|+|SE|114136337|114136491|114133556|114133700|114147894|114147993	-0.066	ENSMUSG00000031767|Nudt7|chr8|+|SE|114136337|114136491|114133556|114133700|114147894|114147993|NEG
ENSMUSG00000042705|Commd10|chr18|+|SE|46963659|46963770|46960415|46960506|46990478|46990589	-0.066	ENSMUSG00000042705|Commd10|chr18|+|SE|46963659|46963770|46960415|46960506|46990478|46990589|NEG
ENSMUSG00000021111|Papola|chr12|+|SE|105808554|105808666|105807164|105807218|105809342|105809432	-0.065	ENSMUSG00000021111|Papola|chr12|+|SE|105808554|105808666|105807164|105807218|105809342|105809432|NEG
ENSMUSG00000014402|Tsg101|chr7|-|A3SS|46908904|46909068|46908904|46908991|46910744|46910810	-0.065	ENSMUSG00000014402|Tsg101|chr7|-|A3SS|46908904|46909068|46908904|46908991|46910744|46910810|NEG
ENSMUSG00000033439|Trmt13|chr3|-|SE|116592463|116592510|116592192|116592259|116594638|116594668	-0.065	ENSMUSG00000033439|Trmt13|chr3|-|SE|116592463|116592510|116592192|116592259|116594638|116594668|NEG
ENSMUSG00000024969|Mark2|chr19|-|SE|7281797|7281959|7280997|7281255|7282725|7282818	-0.065	ENSMUSG00000024969|Mark2|chr19|-|SE|7281797|7281959|7280997|7281255|7282725|7282818|NEG
ENSMUSG00000025085|Ablim1|chr19|-|SE|57046924|57047065|57044880|57044972|57049461|57049509	-0.065	ENSMUSG00000025085|Ablim1|chr19|-|SE|57046924|57047065|57044880|57044972|57049461|57049509|NEG
ENSMUSG00000021115|Vrk1|chr12|+|SE|106071569|106071641|106070524|106070615|106073618|106073678	-0.065	ENSMUSG00000021115|Vrk1|chr12|+|SE|106071569|106071641|106070524|106070615|106073618|106073678|NEG
ENSMUSG00000060950|Trmt61a|chr12|+|A5SS|111678104|111678300|111678104|111678161|111678602|111678962	-0.064	ENSMUSG00000060950|Trmt61a|chr12|+|A5SS|111678104|111678300|111678104|111678161|111678602|111678962|NEG
ENSMUSG00000029003|Mad2l2|chr4|+|A3SS|148145103|148145196|148145125|148145196|148144653|148144727	-0.064	ENSMUSG00000029003|Mad2l2|chr4|+|A3SS|148145103|148145196|148145125|148145196|148144653|148144727|NEG
ENSMUSG00000019948|Actr6|chr10|-|SE|89728899|89729017|89728140|89728222|89732173|89732273	-0.063	ENSMUSG00000019948|Actr6|chr10|-|SE|89728899|89729017|89728140|89728222|89732173|89732273|NEG
ENSMUSG00000032939|Nup93|chr8|+|SE|94220559|94220611|94214600|94214631|94227662|94227855	-0.063	ENSMUSG00000032939|Nup93|chr8|+|SE|94220559|94220611|94214600|94214631|94227662|94227855|NEG
ENSMUSG00000067369|Trmt2b|chrX|-|SE|134270509|134270585|134267330|134267561|134276845|134276920	-0.063	ENSMUSG00000067369|Trmt2b|chrX|-|SE|134270509|134270585|134267330|134267561|134276845|134276920|NEG
ENSMUSG00000025939|Ube2w|chr1|-|A3SS|16585275|16585431|16585275|16585352|16597950|16598053	-0.062	ENSMUSG00000025939|Ube2w|chr1|-|A3SS|16585275|16585431|16585275|16585352|16597950|16598053|NEG
ENSMUSG00000097378|B230208H11Rik|chr10|-|SE|12922365|12922458|12921608|12921717|12922573|12923090	-0.062	ENSMUSG00000097378|B230208H11Rik|chr10|-|SE|12922365|12922458|12921608|12921717|12922573|12923090|NEG
ENSMUSG00000063576|Klhdc3|chr17|-|SE|46679041|46679194|46678280|46678493|46680701|46680789	-0.062	ENSMUSG00000063576|Klhdc3|chr17|-|SE|46679041|46679194|46678280|46678493|46680701|46680789|NEG
ENSMUSG00000021144|Mta1|chr12|+|A3SS|113131315|113131467|113131362|113131467|113130884|113131000	-0.062	ENSMUSG00000021144|Mta1|chr12|+|A3SS|113131315|113131467|113131362|113131467|113130884|113131000|NEG
ENSMUSG00000029569|Tmem168|chr6|-|SE|13602237|13603487|13594943|13595086|13607829|13608100	-0.062	ENSMUSG00000029569|Tmem168|chr6|-|SE|13602237|13603487|13594943|13595086|13607829|13608100|NEG
ENSMUSG00000020248|Nfyb|chr10|-|SE|82754964|82755095|82749286|82752604|82756701|82756795	-0.062	ENSMUSG00000020248|Nfyb|chr10|-|SE|82754964|82755095|82749286|82752604|82756701|82756795|NEG
ENSMUSG00000047454|Gphn|chr12|+|SE|78493949|78494057|78492037|78492310|78504616|78504751	-0.062	ENSMUSG00000047454|Gphn|chr12|+|SE|78493949|78494057|78492037|78492310|78504616|78504751|NEG
ENSMUSG00000001173|Ocrl|chrX|+|SE|47916474|47916554|47912968|47913048|47920160|47920199	-0.062	ENSMUSG00000001173|Ocrl|chrX|+|SE|47916474|47916554|47912968|47913048|47920160|47920199|NEG
ENSMUSG00000055541|Lair1|chr7|-|SE|4010729|4010846|4010589|4010632|4028706|4029036	-0.062	ENSMUSG00000055541|Lair1|chr7|-|SE|4010729|4010846|4010589|4010632|4028706|4029036|NEG
ENSMUSG00000047412|Zbtb44|chr9|+|A3SS|31064178|31064342|31064232|31064342|31062040|31062125	-0.062	ENSMUSG00000047412|Zbtb44|chr9|+|A3SS|31064178|31064342|31064232|31064342|31062040|31062125|NEG
ENSMUSG00000035900|Gramd4|chr15|+|A3SS|86129619|86129721|86129649|86129721|86128664|86128713	-0.062	ENSMUSG00000035900|Gramd4|chr15|+|A3SS|86129619|86129721|86129649|86129721|86128664|86128713|NEG
ENSMUSG00000041954|Tnfrsf18|chr4|+|RI|156027961|156028423|156027961|156028049|156028220|156028423	-0.062	ENSMUSG00000041954|Tnfrsf18|chr4|+|RI|156027961|156028423|156027961|156028049|156028220|156028423|NEG
ENSMUSG00000008435|Rdh13|chr7|-|SE|4443736|4443771|4442650|4442749|4444202|4444321	-0.062	ENSMUSG00000008435|Rdh13|chr7|-|SE|4443736|4443771|4442650|4442749|4444202|4444321|NEG
ENSMUSG00000027288|Zfp106|chr2|-|SE|120539294|120539492|120533510|120535679|120545842|120545901	-0.061	ENSMUSG00000027288|Zfp106|chr2|-|SE|120539294|120539492|120533510|120535679|120545842|120545901|NEG
ENSMUSG00000031386|Hcfc1|chrX|-|A3SS|73947841|73948418|73947841|73948286|73948901|73949065	-0.061	ENSMUSG00000031386|Hcfc1|chrX|-|A3SS|73947841|73948418|73947841|73948286|73948901|73949065|NEG
ENSMUSG00000026773|Pfkfb3|chr2|-|SE|11480197|11480371|11471432|11474543|11481870|11481935	-0.061	ENSMUSG00000026773|Pfkfb3|chr2|-|SE|11480197|11480371|11471432|11474543|11481870|11481935|NEG
ENSMUSG00000036109|Mbnl3|chrX|-|A3SS|51128920|51129071|51128920|51128966|51130104|51130341	-0.06	ENSMUSG00000036109|Mbnl3|chrX|-|A3SS|51128920|51129071|51128920|51128966|51130104|51130341|NEG
ENSMUSG00000024378|Stard4|chr18|-|SE|33205050|33205165|33199354|33203815|33206119|33206246	-0.06	ENSMUSG00000024378|Stard4|chr18|-|SE|33205050|33205165|33199354|33203815|33206119|33206246|NEG
ENSMUSG00000025525|Apool|chrX|+|SE|112364156|112364270|112354160|112354252|112364461|112364570	-0.06	ENSMUSG00000025525|Apool|chrX|+|SE|112364156|112364270|112354160|112354252|112364461|112364570|NEG
ENSMUSG00000020919|Stat5b|chr11|-|A3SS|100804869|100805026|100804869|100804998|100808395|100808533	-0.06	ENSMUSG00000020919|Stat5b|chr11|-|A3SS|100804869|100805026|100804869|100804998|100808395|100808533|NEG
ENSMUSG00000028479|Gne|chr4|-|SE|44059775|44060227|44055204|44055357|44066754|44066920	-0.06	ENSMUSG00000028479|Gne|chr4|-|SE|44059775|44060227|44055204|44055357|44066754|44066920|NEG
ENSMUSG00000029104|Htt|chr5|+|SE|34790266|34790387|34782741|34782825|34794104|34794164	-0.06	ENSMUSG00000029104|Htt|chr5|+|SE|34790266|34790387|34782741|34782825|34794104|34794164|NEG
ENSMUSG00000021557|Agtpbp1|chr13|-|SE|59460468|59460629|59445741|59450314|59461996|59462173	-0.06	ENSMUSG00000021557|Agtpbp1|chr13|-|SE|59460468|59460629|59445741|59450314|59461996|59462173|NEG
ENSMUSG00000031666|Rbl2|chr8|+|SE|91083298|91083427|91078879|91078944|91085432|91085593	-0.059	ENSMUSG00000031666|Rbl2|chr8|+|SE|91083298|91083427|91078879|91078944|91085432|91085593|NEG
ENSMUSG00000036893|Ehmt1|chr2|-|A3SS|24863771|24863929|24863771|24863908|24877454|24877626	-0.059	ENSMUSG00000036893|Ehmt1|chr2|-|A3SS|24863771|24863929|24863771|24863908|24877454|24877626|NEG
ENSMUSG00000024283|Wac|chr18|+|SE|7910515|7910824|7905931|7906044|7916051|7916284	-0.059	ENSMUSG00000024283|Wac|chr18|+|SE|7910515|7910824|7905931|7906044|7916051|7916284|NEG
ENSMUSG00000006169|Clint1|chr11|+|SE|45902210|45902285|45895059|45895129|45906180|45906467	-0.059	ENSMUSG00000006169|Clint1|chr11|+|SE|45902210|45902285|45895059|45895129|45906180|45906467|NEG
ENSMUSG00000026150|Mff|chr1|+|SE|82745523|82745556|82735418|82735507|82747082|82747142	-0.059	ENSMUSG00000026150|Mff|chr1|+|SE|82745523|82745556|82735418|82735507|82747082|82747142|NEG
ENSMUSG00000064215|Ifi27|chr12|+|SE|103436562|103436682|103435421|103435573|103439400|103439562	-0.059	ENSMUSG00000064215|Ifi27|chr12|+|SE|103436562|103436682|103435421|103435573|103439400|103439562|NEG
ENSMUSG00000052707|Tnrc6a|chr7|+|SE|123143749|123143837|123124667|123124715|123152163|123152185	-0.059	ENSMUSG00000052707|Tnrc6a|chr7|+|SE|123143749|123143837|123124667|123124715|123152163|123152185|NEG
ENSMUSG00000059890|Ube4a|chr9|-|A3SS|44952941|44953172|44952941|44953115|44959978|44960139	-0.058	ENSMUSG00000059890|Ube4a|chr9|-|A3SS|44952941|44953172|44952941|44953115|44959978|44960139|NEG
ENSMUSG00000037461|Ints7|chr1|+|SE|191582398|191582528|191575635|191575951|191583178|191583325	-0.058	ENSMUSG00000037461|Ints7|chr1|+|SE|191582398|191582528|191575635|191575951|191583178|191583325|NEG
ENSMUSG00000025404|R3hdm2|chr10|+|SE|127462187|127462283|127459466|127459575|127464981|127465013	-0.058	ENSMUSG00000025404|R3hdm2|chr10|+|SE|127462187|127462283|127459466|127459575|127464981|127465013|NEG
ENSMUSG00000031948|Kars|chr8|-|SE|112008206|112008386|112005631|112005788|112011209|112011266	-0.058	ENSMUSG00000031948|Kars|chr8|-|SE|112008206|112008386|112005631|112005788|112011209|112011266|NEG
ENSMUSG00000039988|Ankrd13c|chr3|+|A3SS|157972999|157975294|157975227|157975294|157972231|157972317	-0.058	ENSMUSG00000039988|Ankrd13c|chr3|+|A3SS|157972999|157975294|157975227|157975294|157972231|157972317|NEG
ENSMUSG00000015790|Surf1|chr2|-|A3SS|26915595|26915769|26915595|26915729|26915954|26916006	-0.058	ENSMUSG00000015790|Surf1|chr2|-|A3SS|26915595|26915769|26915595|26915729|26915954|26916006|NEG
ENSMUSG00000021669|Col4a3bp|chr13|+|SE|96616993|96617071|96616456|96616549|96624694|96624790	-0.058	ENSMUSG00000021669|Col4a3bp|chr13|+|SE|96616993|96617071|96616456|96616549|96624694|96624790|NEG
ENSMUSG00000009687|Fxyd5|chr7|-|RI|31032729|31033018|31032729|31032880|31032972|31033018	-0.057	ENSMUSG00000009687|Fxyd5|chr7|-|RI|31032729|31033018|31032729|31032880|31032972|31033018|NEG
ENSMUSG00000078713|Tomm5|chr4|-|SE|45106838|45106888|45105211|45105644|45107912|45108108	-0.057	ENSMUSG00000078713|Tomm5|chr4|-|SE|45106838|45106888|45105211|45105644|45107912|45108108|NEG
ENSMUSG00000033545|Znrf1|chr8|+|RI|111621595|111626030|111621595|111621687|111622798|111626030	-0.057	ENSMUSG00000033545|Znrf1|chr8|+|RI|111621595|111626030|111621595|111621687|111622798|111626030|NEG
ENSMUSG00000021870|Slmap|chr14|-|SE|26453537|26453600|26442574|26442634|26460041|26460210	-0.057	ENSMUSG00000021870|Slmap|chr14|-|SE|26453537|26453600|26442574|26442634|26460041|26460210|NEG
ENSMUSG00000028060|Khdc4|chr3|+|A3SS|88700260|88700514|88700361|88700514|88699950|88700008	-0.057	ENSMUSG00000028060|Khdc4|chr3|+|A3SS|88700260|88700514|88700361|88700514|88699950|88700008|NEG
ENSMUSG00000035569|Ankrd11|chr8|-|SE|122900601|122900698|122899978|122900149|122908667|122908806	-0.056	ENSMUSG00000035569|Ankrd11|chr8|-|SE|122900601|122900698|122899978|122900149|122908667|122908806|NEG
ENSMUSG00000030316|Tamm41|chr6|-|SE|115016082|115016228|115012157|115012319|115025273|115025424	-0.056	ENSMUSG00000030316|Tamm41|chr6|-|SE|115016082|115016228|115012157|115012319|115025273|115025424|NEG
ENSMUSG00000064138|Fam172a|chr13|+|SE|77742762|77742886|77708689|77708853|77759427|77759529	-0.056	ENSMUSG00000064138|Fam172a|chr13|+|SE|77742762|77742886|77708689|77708853|77759427|77759529|NEG
ENSMUSG00000038773|Kdm3b|chr18|+|SE|34803449|34804049|34799284|34799359|34808240|34809489	-0.055	ENSMUSG00000038773|Kdm3b|chr18|+|SE|34803449|34804049|34799284|34799359|34808240|34809489|NEG
ENSMUSG00000034252|Senp6|chr9|+|SE|80089848|80089906|80087429|80087523|80092266|80092412	-0.055	ENSMUSG00000034252|Senp6|chr9|+|SE|80089848|80089906|80087429|80087523|80092266|80092412|NEG
ENSMUSG00000018548|Trim37|chr11|+|SE|87137589|87137630|87129715|87129817|87140484|87140601	-0.055	ENSMUSG00000018548|Trim37|chr11|+|SE|87137589|87137630|87129715|87129817|87140484|87140601|NEG
ENSMUSG00000035953|Pip4p1|chr14|-|SE|50929201|50929307|50928921|50929058|50929583|50929690	-0.055	ENSMUSG00000035953|Pip4p1|chr14|-|SE|50929201|50929307|50928921|50929058|50929583|50929690|NEG
ENSMUSG00000006392|Med8|chr4|+|A3SS|118411657|118411802|118411697|118411802|118410884|118411003	-0.055	ENSMUSG00000006392|Med8|chr4|+|A3SS|118411657|118411802|118411697|118411802|118410884|118411003|NEG
ENSMUSG00000026600|Soat1|chr1|-|SE|156466657|156466798|156457945|156458004|156474147|156474264	-0.055	ENSMUSG00000026600|Soat1|chr1|-|SE|156466657|156466798|156457945|156458004|156474147|156474264|NEG
ENSMUSG00000026034|Clk1|chr1|-|SE|58417012|58417179|58414589|58414684|58417266|58417383	-0.054	ENSMUSG00000026034|Clk1|chr1|-|SE|58417012|58417179|58414589|58414684|58417266|58417383|NEG
ENSMUSG00000002010|Idh3g|chrX|-|RI|73782005|73782716|73782005|73782103|73782674|73782716	-0.054	ENSMUSG00000002010|Idh3g|chrX|-|RI|73782005|73782716|73782005|73782103|73782674|73782716|NEG
ENSMUSG00000032410|Xrn1|chr9|+|SE|95974395|95974463|95973449|95973618|95974761|95974899	-0.054	ENSMUSG00000032410|Xrn1|chr9|+|SE|95974395|95974463|95973449|95973618|95974761|95974899|NEG
ENSMUSG00000009687|Fxyd5|chr7|-|A3SS|31040182|31040272|31040182|31040221|31041396|31041457	-0.054	ENSMUSG00000009687|Fxyd5|chr7|-|A3SS|31040182|31040272|31040182|31040221|31041396|31041457|NEG
ENSMUSG00000022386|Trmu|chr15|+|SE|85894177|85894283|85893953|85894020|85894925|85895026	-0.053	ENSMUSG00000022386|Trmu|chr15|+|SE|85894177|85894283|85893953|85894020|85894925|85895026|NEG
ENSMUSG00000042472|Zfp410|chr12|+|A3SS|84325570|84325789|84325602|84325789|84322883|84323019	-0.053	ENSMUSG00000042472|Zfp410|chr12|+|A3SS|84325570|84325789|84325602|84325789|84322883|84323019|NEG
ENSMUSG00000033159|Cnppd1|chr1|-|SE|75142057|75142560|75141415|75141503|75142642|75142697	-0.053	ENSMUSG00000033159|Cnppd1|chr1|-|SE|75142057|75142560|75141415|75141503|75142642|75142697|NEG
ENSMUSG00000020740|Gga3|chr11|-|A3SS|115586315|115586485|115586315|115586420|115586995|115587201	-0.053	ENSMUSG00000020740|Gga3|chr11|-|A3SS|115586315|115586485|115586315|115586420|115586995|115587201|NEG
ENSMUSG00000032480|Dhx30|chr9|-|SE|110107940|110107969|110098728|110098859|110109025|110109121	-0.053	ENSMUSG00000032480|Dhx30|chr9|-|SE|110107940|110107969|110098728|110098859|110109025|110109121|NEG
ENSMUSG00000034593|Myo5a|chr9|+|SE|75192383|75192464|75189899|75190000|75193938|75194100	-0.052	ENSMUSG00000034593|Myo5a|chr9|+|SE|75192383|75192464|75189899|75190000|75193938|75194100|NEG
ENSMUSG00000026860|Sh3glb2|chr2|-|SE|30346058|30346073|30345698|30345939|30346352|30346453	-0.052	ENSMUSG00000026860|Sh3glb2|chr2|-|SE|30346058|30346073|30345698|30345939|30346352|30346453|NEG
ENSMUSG00000020166|Cnot2|chr10|-|SE|116517316|116517383|116507040|116507188|116527826|116527949	-0.052	ENSMUSG00000020166|Cnot2|chr10|-|SE|116517316|116517383|116507040|116507188|116527826|116527949|NEG
ENSMUSG00000022253|Nadk2|chr15|+|SE|9098808|9098874|9096013|9096092|9100105|9100145	-0.052	ENSMUSG00000022253|Nadk2|chr15|+|SE|9098808|9098874|9096013|9096092|9100105|9100145|NEG
ENSMUSG00000013846|St3gal1|chr15|-|SE|67162986|67163051|67153042|67153170|67176631|67176712	-0.052	ENSMUSG00000013846|St3gal1|chr15|-|SE|67162986|67163051|67153042|67153170|67176631|67176712|NEG
ENSMUSG00000001482|Def8|chr8|+|SE|123447316|123447363|123442995|123443051|123447787|123447912	-0.052	ENSMUSG00000001482|Def8|chr8|+|SE|123447316|123447363|123442995|123443051|123447787|123447912|NEG
ENSMUSG00000042348|Arl15|chr13|+|SE|113934063|113934123|113922246|113922391|113967581|113967790	-0.052	ENSMUSG00000042348|Arl15|chr13|+|SE|113934063|113934123|113922246|113922391|113967581|113967790|NEG
ENSMUSG00000015189|Casd1|chr6|+|SE|4634001|4634103|4631518|4631598|4635745|4635886	-0.052	ENSMUSG00000015189|Casd1|chr6|+|SE|4634001|4634103|4631518|4631598|4635745|4635886|NEG
ENSMUSG00000078671|Chd2|chr7|-|SE|73500934|73501035|73499938|73499983|73501908|73502036	-0.052	ENSMUSG00000078671|Chd2|chr7|-|SE|73500934|73501035|73499938|73499983|73501908|73502036|NEG
ENSMUSG00000022992|Kansl2|chr15|-|A5SS|98533901|98534264|98534240|98534264|98533517|98533776	-0.052	ENSMUSG00000022992|Kansl2|chr15|-|A5SS|98533901|98534264|98534240|98534264|98533517|98533776|NEG
ENSMUSG00000042396|Rbm7|chr9|-|SE|48494282|48494387|48494018|48494181|48495154|48495294	-0.052	ENSMUSG00000042396|Rbm7|chr9|-|SE|48494282|48494387|48494018|48494181|48495154|48495294|NEG
ENSMUSG00000001517|Foxm1|chr6|+|SE|128371967|128372012|128370956|128371085|128372533|128372603	-0.051	ENSMUSG00000001517|Foxm1|chr6|+|SE|128371967|128372012|128370956|128371085|128372533|128372603|NEG
ENSMUSG00000032376|Usp3|chr9|-|SE|66542512|66542626|66540061|66540175|66543945|66544028	-0.051	ENSMUSG00000032376|Usp3|chr9|-|SE|66542512|66542626|66540061|66540175|66543945|66544028|NEG
ENSMUSG00000031634|Ufsp2|chr8|+|SE|45980572|45980639|45980314|45980492|45984040|45984233	-0.051	ENSMUSG00000031634|Ufsp2|chr8|+|SE|45980572|45980639|45980314|45980492|45984040|45984233|NEG
ENSMUSG00000064043|Trerf1|chr17|+|SE|47319351|47319678|47317767|47317921|47323277|47323662	-0.051	ENSMUSG00000064043|Trerf1|chr17|+|SE|47319351|47319678|47317767|47317921|47323277|47323662|NEG
ENSMUSG00000027615|Hps3|chr3|-|A3SS|20030313|20030805|20030313|20030409|20035048|20035302	-0.051	ENSMUSG00000027615|Hps3|chr3|-|A3SS|20030313|20030805|20030313|20030409|20035048|20035302|NEG
ENSMUSG00000035248|Tut7|chr13|-|SE|59802991|59803111|59802015|59802196|59805222|59805375	-0.051	ENSMUSG00000035248|Tut7|chr13|-|SE|59802991|59803111|59802015|59802196|59805222|59805375|NEG
ENSMUSG00000041921|Metap1d|chr2|+|SE|71515636|71515800|71512125|71512168|71522532|71522630	-0.051	ENSMUSG00000041921|Metap1d|chr2|+|SE|71515636|71515800|71512125|71512168|71522532|71522630|NEG
ENSMUSG00000044452|Zfp507|chr7|-|SE|35793522|35795618|35791647|35791762|35801437|35801528	-0.051	ENSMUSG00000044452|Zfp507|chr7|-|SE|35793522|35795618|35791647|35791762|35801437|35801528|NEG
ENSMUSG00000022635|Zcrb1|chr15|-|SE|93393706|93393764|93391453|93391565|93395586|93395615	-0.051	ENSMUSG00000022635|Zcrb1|chr15|-|SE|93393706|93393764|93391453|93391565|93395586|93395615|NEG
ENSMUSG00000031310|Zmym3|chrX|-|SE|101416166|101416461|101414928|101415938|101416908|101416975	0.051	ENSMUSG00000031310|Zmym3|chrX|-|SE|101416166|101416461|101414928|101415938|101416908|101416975|POS
ENSMUSG00000009555|Cdk9|chr2|-|A3SS|32710476|32710791|32710476|32710567|32712030|32712112	0.051	ENSMUSG00000009555|Cdk9|chr2|-|A3SS|32710476|32710791|32710476|32710567|32712030|32712112|POS
ENSMUSG00000022973|Synj1|chr16|-|SE|90947014|90947053|90946791|90946862|90950350|90950485	0.051	ENSMUSG00000022973|Synj1|chr16|-|SE|90947014|90947053|90946791|90946862|90950350|90950485|POS
ENSMUSG00000042055|Wdr11|chr7|+|RI|129630619|129631269|129630619|129630797|129631173|129631269	0.051	ENSMUSG00000042055|Wdr11|chr7|+|RI|129630619|129631269|129630619|129630797|129631173|129631269|POS
ENSMUSG00000037458|Azin1|chr15|-|A3SS|38497263|38497550|38497263|38497398|38498668|38498841	0.051	ENSMUSG00000037458|Azin1|chr15|-|A3SS|38497263|38497550|38497263|38497398|38498668|38498841|POS
ENSMUSG00000031939|Taf1d|chr9|+|RI|15315101|15315440|15315101|15315131|15315382|15315440	0.052	ENSMUSG00000031939|Taf1d|chr9|+|RI|15315101|15315440|15315101|15315131|15315382|15315440|POS
ENSMUSG00000024234|Mtpap|chr18|+|A3SS|4380653|4380887|4380672|4380887|4379568|4379741	0.052	ENSMUSG00000024234|Mtpap|chr18|+|A3SS|4380653|4380887|4380672|4380887|4379568|4379741|POS
ENSMUSG00000020859|Spag9|chr11|+|RI|94092337|94092982|94092337|94092427|94092814|94092982	0.052	ENSMUSG00000020859|Spag9|chr11|+|RI|94092337|94092982|94092337|94092427|94092814|94092982|POS
ENSMUSG00000039738|Slx4|chr16|-|SE|3982978|3983242|3981584|3981687|3984990|3987181	0.052	ENSMUSG00000039738|Slx4|chr16|-|SE|3982978|3983242|3981584|3981687|3984990|3987181|POS
ENSMUSG00000002668|Dennd1c|chr17|-|SE|57067916|57067949|57067788|57067833|57070112|57070184	0.052	ENSMUSG00000002668|Dennd1c|chr17|-|SE|57067916|57067949|57067788|57067833|57070112|57070184|POS
ENSMUSG00000058298|Mcm9|chr10|-|A3SS|53615851|53616115|53615851|53616052|53620133|53620215	0.052	ENSMUSG00000058298|Mcm9|chr10|-|A3SS|53615851|53616115|53615851|53616052|53620133|53620215|POS
ENSMUSG00000020513|Tubd1|chr11|+|SE|86556694|86556787|86555072|86555304|86557724|86557889	0.052	ENSMUSG00000020513|Tubd1|chr11|+|SE|86556694|86556787|86555072|86555304|86557724|86557889|POS
ENSMUSG00000032294|Pkm|chr9|+|MXE|59675028|59675195|59675567|59675734|59671920|59672073|59678043|59678225	0.053	ENSMUSG00000032294|Pkm|chr9|+|MXE|59675028|59675195|59675567|59675734|59671920|59672073|59678043|59678225|POS
ENSMUSG00000037270|4932438A13Rik|chr3|+|A5SS|36889822|36889996|36889822|36889902|36890794|36890945	0.053	ENSMUSG00000037270|4932438A13Rik|chr3|+|A5SS|36889822|36889996|36889822|36889902|36890794|36890945|POS
ENSMUSG00000031570|Plpp5|chr8|+|SE|25723030|25723113|25721980|25722600|25724079|25724226	0.053	ENSMUSG00000031570|Plpp5|chr8|+|SE|25723030|25723113|25721980|25722600|25724079|25724226|POS
ENSMUSG00000046897|Zfp740|chr15|+|SE|102208752|102208876|102208235|102208361|102209154|102209273	0.053	ENSMUSG00000046897|Zfp740|chr15|+|SE|102208752|102208876|102208235|102208361|102209154|102209273|POS
ENSMUSG00000038644|Pold1|chr7|-|A3SS|44542103|44542409|44542103|44542250|44542764|44542878	0.053	ENSMUSG00000038644|Pold1|chr7|-|A3SS|44542103|44542409|44542103|44542250|44542764|44542878|POS
ENSMUSG00000025899|Alkbh8|chr9|+|SE|3347261|3347409|3345780|3345876|3347803|3347908	0.054	ENSMUSG00000025899|Alkbh8|chr9|+|SE|3347261|3347409|3345780|3345876|3347803|3347908|POS
ENSMUSG00000040359|Ufl1|chr4|-|RI|25269027|25270618|25269027|25269174|25270559|25270618	0.054	ENSMUSG00000040359|Ufl1|chr4|-|RI|25269027|25270618|25269027|25269174|25270559|25270618|POS
ENSMUSG00000021910|Nisch|chr14|-|SE|31182498|31182640|31180821|31180949|31184941|31185050	0.054	ENSMUSG00000021910|Nisch|chr14|-|SE|31182498|31182640|31180821|31180949|31184941|31185050|POS
ENSMUSG00000053332|Gas5|chr1|+|RI|161036819|161037315|161036819|161037164|161037287|161037315	0.054	ENSMUSG00000053332|Gas5|chr1|+|RI|161036819|161037315|161036819|161037164|161037287|161037315|POS
ENSMUSG00000031511|Arhgef7|chr8|+|SE|11817659|11817884|11815160|11815300|11819637|11819731	0.054	ENSMUSG00000031511|Arhgef7|chr8|+|SE|11817659|11817884|11815160|11815300|11819637|11819731|POS
ENSMUSG00000086316|Nbdy|chrX|+|SE|153728861|153728939|153725704|153725841|153741039|153741084	0.055	ENSMUSG00000086316|Nbdy|chrX|+|SE|153728861|153728939|153725704|153725841|153741039|153741084|POS
ENSMUSG00000039473|Ubn1|chr16|+|SE|5053727|5053841|5050067|5050781|5055076|5055364	0.055	ENSMUSG00000039473|Ubn1|chr16|+|SE|5053727|5053841|5050067|5050781|5055076|5055364|POS
ENSMUSG00000066406|Akap13|chr7|+|SE|75679819|75679873|75677105|75677479|75685116|75685309	0.055	ENSMUSG00000066406|Akap13|chr7|+|SE|75679819|75679873|75677105|75677479|75685116|75685309|POS
ENSMUSG00000053158|Fes|chr7|-|RI|80381164|80381810|80381164|80381287|80381600|80381810	0.055	ENSMUSG00000053158|Fes|chr7|-|RI|80381164|80381810|80381164|80381287|80381600|80381810|POS
ENSMUSG00000025507|Pidd1|chr7|-|RI|141439077|141439491|141439077|141439277|141439377|141439491	0.055	ENSMUSG00000025507|Pidd1|chr7|-|RI|141439077|141439491|141439077|141439277|141439377|141439491|POS
ENSMUSG00000029022|Miip|chr4|-|A3SS|147860790|147861085|147860790|147861013|147861353|147861491	0.056	ENSMUSG00000029022|Miip|chr4|-|A3SS|147860790|147861085|147860790|147861013|147861353|147861491|POS
ENSMUSG00000066800|Rnasel|chr1|+|A3SS|153753606|153755213|153753634|153755213|153752844|153752947	0.056	ENSMUSG00000066800|Rnasel|chr1|+|A3SS|153753606|153755213|153753634|153755213|153752844|153752947|POS
ENSMUSG00000020366|Mapk9|chr11|+|SE|49854736|49854977|49854229|49854382|49863543|49863673	0.056	ENSMUSG00000020366|Mapk9|chr11|+|SE|49854736|49854977|49854229|49854382|49863543|49863673|POS
ENSMUSG00000028064|Sema4a|chr3|-|RI|88451344|88451786|88451344|88451450|88451687|88451786	0.056	ENSMUSG00000028064|Sema4a|chr3|-|RI|88451344|88451786|88451344|88451450|88451687|88451786|POS
ENSMUSG00000025949|Pikfyve|chr1|+|SE|65192530|65192566|65192144|65192294|65195655|65195774	0.057	ENSMUSG00000025949|Pikfyve|chr1|+|SE|65192530|65192566|65192144|65192294|65195655|65195774|POS
ENSMUSG00000024695|Zfp91|chr19|-|RI|12775994|12776462|12775994|12776073|12776411|12776462	0.057	ENSMUSG00000024695|Zfp91|chr19|-|RI|12775994|12776462|12775994|12776073|12776411|12776462|POS
ENSMUSG00000022779|Top3b|chr16|+|RI|16889482|16890261|16889482|16889611|16890111|16890261	0.057	ENSMUSG00000022779|Top3b|chr16|+|RI|16889482|16890261|16889482|16889611|16890111|16890261|POS
ENSMUSG00000029145|Eif2b4|chr5|-|A3SS|31192581|31192770|31192581|31192625|31192992|31193139	0.057	ENSMUSG00000029145|Eif2b4|chr5|-|A3SS|31192581|31192770|31192581|31192625|31192992|31193139|POS
ENSMUSG00000027185|Nat10|chr2|-|RI|103734374|103734990|103734374|103734525|103734865|103734990	0.057	ENSMUSG00000027185|Nat10|chr2|-|RI|103734374|103734990|103734374|103734525|103734865|103734990|POS
ENSMUSG00000028760|Eif4g3|chr4|+|SE|138084256|138084370|138082892|138082988|138096751|138096931	0.058	ENSMUSG00000028760|Eif4g3|chr4|+|SE|138084256|138084370|138082892|138082988|138096751|138096931|POS
ENSMUSG00000058486|Wdr91|chr6|-|SE|34909676|34909827|34909360|34909540|34910696|34910836	0.058	ENSMUSG00000058486|Wdr91|chr6|-|SE|34909676|34909827|34909360|34909540|34910696|34910836|POS
ENSMUSG00000032594|Ip6k1|chr9|+|SE|108045245|108045313|108044724|108044900|108045462|108046143	0.058	ENSMUSG00000032594|Ip6k1|chr9|+|SE|108045245|108045313|108044724|108044900|108045462|108046143|POS
ENSMUSG00000061306|Slc38a10|chr11|-|SE|120108466|120108553|120106433|120106610|120109431|120109536	0.059	ENSMUSG00000061306|Slc38a10|chr11|-|SE|120108466|120108553|120106433|120106610|120109431|120109536|POS
ENSMUSG00000039254|Pomt1|chr2|+|RI|32241652|32243004|32241652|32241799|32242892|32243004	0.059	ENSMUSG00000039254|Pomt1|chr2|+|RI|32241652|32243004|32241652|32241799|32242892|32243004|POS
ENSMUSG00000025236|Adpgk|chr9|+|RI|59310227|59313236|59310227|59310348|59313039|59313236	0.059	ENSMUSG00000025236|Adpgk|chr9|+|RI|59310227|59313236|59310227|59310348|59313039|59313236|POS
ENSMUSG00000019792|Trmt11|chr10|-|RI|30590842|30591102|30590842|30590935|30591020|30591102	0.059	ENSMUSG00000019792|Trmt11|chr10|-|RI|30590842|30591102|30590842|30590935|30591020|30591102|POS
ENSMUSG00000022855|Senp2|chr16|+|SE|22011493|22011619|22009511|22009742|22014123|22014257	0.06	ENSMUSG00000022855|Senp2|chr16|+|SE|22011493|22011619|22009511|22009742|22014123|22014257|POS
ENSMUSG00000072501|Phf20l1|chr15|+|RI|66622760|66624099|66622760|66622817|66623991|66624099	0.06	ENSMUSG00000072501|Phf20l1|chr15|+|RI|66622760|66624099|66622760|66622817|66623991|66624099|POS
ENSMUSG00000024319|Vps52|chr17|+|RI|33962066|33962546|33962066|33962185|33962422|33962546	0.06	ENSMUSG00000024319|Vps52|chr17|+|RI|33962066|33962546|33962066|33962185|33962422|33962546|POS
ENSMUSG00000032469|Dbr1|chr9|+|SE|99578440|99578521|99576575|99576700|99579356|99579442	0.06	ENSMUSG00000032469|Dbr1|chr9|+|SE|99578440|99578521|99576575|99576700|99579356|99579442|POS
ENSMUSG00000036452|Arhgap26|chr18|+|A5SS|39357552|39357828|39357552|39357663|39363116|39363208	0.06	ENSMUSG00000036452|Arhgap26|chr18|+|A5SS|39357552|39357828|39357552|39357663|39363116|39363208|POS
ENSMUSG00000085385|Snhg17|chr2|-|RI|158359181|158360599|158359181|158359432|158360458|158360599	0.06	ENSMUSG00000085385|Snhg17|chr2|-|RI|158359181|158360599|158359181|158359432|158360458|158360599|POS
ENSMUSG00000023952|Gtpbp2|chr17|+|SE|46163033|46163213|46161294|46161326|46163482|46163509	0.061	ENSMUSG00000023952|Gtpbp2|chr17|+|SE|46163033|46163213|46161294|46161326|46163482|46163509|POS
ENSMUSG00000039997|Ifi203|chr1|-|SE|173933782|173933926|173926805|173927222|173935009|173935177	0.061	ENSMUSG00000039997|Ifi203|chr1|-|SE|173933782|173933926|173926805|173927222|173935009|173935177|POS
ENSMUSG00000021546|Hnrnpk|chr13|-|A3SS|58391238|58392476|58391238|58392416|58393195|58393365	0.061	ENSMUSG00000021546|Hnrnpk|chr13|-|A3SS|58391238|58392476|58391238|58392416|58393195|58393365|POS
ENSMUSG00000027677|Ttc14|chr3|+|SE|33803449|33803605|33803074|33803204|33803999|33804071	0.061	ENSMUSG00000027677|Ttc14|chr3|+|SE|33803449|33803605|33803074|33803204|33803999|33804071|POS
ENSMUSG00000012114|Med15|chr16|-|SE|17671544|17671673|17655677|17655805|17673068|17673398	0.061	ENSMUSG00000012114|Med15|chr16|-|SE|17671544|17671673|17655677|17655805|17673068|17673398|POS
ENSMUSG00000053841|Txlna|chr4|-|RI|129631279|129631710|129631279|129631354|129631590|129631710	0.061	ENSMUSG00000053841|Txlna|chr4|-|RI|129631279|129631710|129631279|129631354|129631590|129631710|POS
ENSMUSG00000022552|Sharpin|chr15|-|RI|76348085|76348435|76348085|76348227|76348300|76348435	0.061	ENSMUSG00000022552|Sharpin|chr15|-|RI|76348085|76348435|76348085|76348227|76348300|76348435|POS
ENSMUSG00000029209|Gnpda2|chr5|-|A3SS|69579507|69582293|69579507|69579692|69584973|69585156	0.061	ENSMUSG00000029209|Gnpda2|chr5|-|A3SS|69579507|69582293|69579507|69579692|69584973|69585156|POS
ENSMUSG00000056917|Sipa1|chr19|-|SE|5661595|5661626|5660313|5661111|5662587|5662841	0.061	ENSMUSG00000056917|Sipa1|chr19|-|SE|5661595|5661626|5660313|5661111|5662587|5662841|POS
ENSMUSG00000036202|Rif1|chr2|+|RI|52093502|52094662|52093502|52093589|52094588|52094662	0.062	ENSMUSG00000036202|Rif1|chr2|+|RI|52093502|52094662|52093502|52093589|52094588|52094662|POS
ENSMUSG00000038712|Mindy1|chr3|+|SE|95286695|95286872|95283601|95283625|95287644|95287836	0.062	ENSMUSG00000038712|Mindy1|chr3|+|SE|95286695|95286872|95283601|95283625|95287644|95287836|POS
ENSMUSG00000024792|Zfpl1|chr19|-|RI|6082180|6082471|6082180|6082327|6082398|6082471	0.062	ENSMUSG00000024792|Zfpl1|chr19|-|RI|6082180|6082471|6082180|6082327|6082398|6082471|POS
ENSMUSG00000039219|Arid4b|chr13|+|SE|14169918|14170179|14164766|14164942|14181219|14181304	0.063	ENSMUSG00000039219|Arid4b|chr13|+|SE|14169918|14170179|14164766|14164942|14181219|14181304|POS
ENSMUSG00000031511|Arhgef7|chr8|+|RI|11781154|11782655|11781154|11781239|11782524|11782655	0.063	ENSMUSG00000031511|Arhgef7|chr8|+|RI|11781154|11782655|11781154|11781239|11782524|11782655|POS
ENSMUSG00000021916|Glt8d1|chr14|+|RI|31010080|31010409|31010080|31010165|31010296|31010409	0.063	ENSMUSG00000021916|Glt8d1|chr14|+|RI|31010080|31010409|31010080|31010165|31010296|31010409|POS
ENSMUSG00000033540|Idua|chr5|+|SE|108679498|108679584|108670118|108670259|108679703|108679762	0.063	ENSMUSG00000033540|Idua|chr5|+|SE|108679498|108679584|108670118|108670259|108679703|108679762|POS
ENSMUSG00000018076|Med13l|chr5|+|RI|118749608|118751034|118749608|118749828|118750845|118751034	0.063	ENSMUSG00000018076|Med13l|chr5|+|RI|118749608|118751034|118749608|118749828|118750845|118751034|POS
ENSMUSG00000022558|Mroh1|chr15|+|RI|76446515|76447365|76446515|76446681|76447168|76447365	0.063	ENSMUSG00000022558|Mroh1|chr15|+|RI|76446515|76447365|76446515|76446681|76447168|76447365|POS
ENSMUSG00000017760|Ctsa|chr2|+|RI|164834697|164834924|164834697|164834748|164834837|164834924	0.063	ENSMUSG00000017760|Ctsa|chr2|+|RI|164834697|164834924|164834697|164834748|164834837|164834924|POS
ENSMUSG00000092203|1110038B12Rik|chr17|-|SE|34950697|34950847|34950240|34950475|34951884|34951925	0.064	ENSMUSG00000092203|1110038B12Rik|chr17|-|SE|34950697|34950847|34950240|34950475|34951884|34951925|POS
ENSMUSG00000033540|Idua|chr5|+|A5SS|108680860|108681204|108680860|108681077|108681379|108681592	0.064	ENSMUSG00000033540|Idua|chr5|+|A5SS|108680860|108681204|108680860|108681077|108681379|108681592|POS
ENSMUSG00000041215|Yeats2|chr16|+|RI|20171190|20174539|20171190|20171302|20174494|20174539	0.064	ENSMUSG00000041215|Yeats2|chr16|+|RI|20171190|20174539|20171190|20171302|20174494|20174539|POS
ENSMUSG00000034928|Rnf44|chr13|-|RI|54683960|54684488|54683960|54684086|54684337|54684488	0.064	ENSMUSG00000034928|Rnf44|chr13|-|RI|54683960|54684488|54683960|54684086|54684337|54684488|POS
ENSMUSG00000002608|Ccdc97|chr7|-|SE|25716853|25716999|25715734|25716187|25718917|25719045	0.064	ENSMUSG00000002608|Ccdc97|chr7|-|SE|25716853|25716999|25715734|25716187|25718917|25719045|POS
ENSMUSG00000034022|Cpsf1|chr15|-|RI|76596219|76596571|76596219|76596349|76596415|76596571	0.064	ENSMUSG00000034022|Cpsf1|chr15|-|RI|76596219|76596571|76596219|76596349|76596415|76596571|POS
ENSMUSG00000027889|Ampd2|chr3|-|RI|108075248|108075704|108075248|108075359|108075530|108075704	0.064	ENSMUSG00000027889|Ampd2|chr3|-|RI|108075248|108075704|108075248|108075359|108075530|108075704|POS
ENSMUSG00000022475|Hdac7|chr15|-|RI|97800694|97802125|97800694|97800802|97802075|97802125	0.064	ENSMUSG00000022475|Hdac7|chr15|-|RI|97800694|97802125|97800694|97800802|97802075|97802125|POS
ENSMUSG00000032067|Pts|chr9|-|A5SS|50525152|50525284|50525261|50525284|50524722|50524779	0.064	ENSMUSG00000032067|Pts|chr9|-|A5SS|50525152|50525284|50525261|50525284|50524722|50524779|POS
ENSMUSG00000028245|Nsmaf|chr4|-|RI|6420049|6421136|6420049|6420140|6421056|6421136	0.065	ENSMUSG00000028245|Nsmaf|chr4|-|RI|6420049|6421136|6420049|6420140|6421056|6421136|POS
ENSMUSG00000010277|2610507B11Rik|chr11|+|RI|78272777|78273299|78272777|78272969|78273096|78273299	0.065	ENSMUSG00000010277|2610507B11Rik|chr11|+|RI|78272777|78273299|78272777|78272969|78273096|78273299|POS
ENSMUSG00000021738|Atxn7|chr14|+|SE|14101601|14101668|14099934|14100901|14103306|14103507	0.065	ENSMUSG00000021738|Atxn7|chr14|+|SE|14101601|14101668|14099934|14100901|14103306|14103507|POS
ENSMUSG00000039219|Arid4b|chr13|+|SE|14169918|14170071|14164766|14164942|14181219|14181304	0.066	ENSMUSG00000039219|Arid4b|chr13|+|SE|14169918|14170071|14164766|14164942|14181219|14181304|POS
ENSMUSG00000034269|Setd5|chr6|+|SE|113110084|113110221|113109884|113109990|113110316|113110525	0.066	ENSMUSG00000034269|Setd5|chr6|+|SE|113110084|113110221|113109884|113109990|113110316|113110525|POS
ENSMUSG00000075703|Selenoi|chr5|+|A5SS|30257711|30257820|30257711|30257761|30263070|30263119	0.066	ENSMUSG00000075703|Selenoi|chr5|+|A5SS|30257711|30257820|30257711|30257761|30263070|30263119|POS
ENSMUSG00000020455|Trim11|chr11|+|SE|58987632|58987680|58981992|58982223|58988724|58988747	0.066	ENSMUSG00000020455|Trim11|chr11|+|SE|58987632|58987680|58981992|58982223|58988724|58988747|POS
ENSMUSG00000034278|Dnajc17|chr2|-|A3SS|119180486|119180680|119180486|119180564|119180925|119180969	0.067	ENSMUSG00000034278|Dnajc17|chr2|-|A3SS|119180486|119180680|119180486|119180564|119180925|119180969|POS
ENSMUSG00000026159|Agfg1|chr1|+|SE|82886374|82886467|82886110|82886187|82893423|82893582	0.068	ENSMUSG00000026159|Agfg1|chr1|+|SE|82886374|82886467|82886110|82886187|82893423|82893582|POS
ENSMUSG00000032580|Rbm5|chr9|-|SE|107755852|107755913|107754422|107754488|107756908|107756992	0.068	ENSMUSG00000032580|Rbm5|chr9|-|SE|107755852|107755913|107754422|107754488|107756908|107756992|POS
ENSMUSG00000027900|Dram2|chr3|+|SE|106550498|106550675|106547830|106547920|106552155|106552280	0.068	ENSMUSG00000027900|Dram2|chr3|+|SE|106550498|106550675|106547830|106547920|106552155|106552280|POS
ENSMUSG00000005534|Insr|chr8|-|SE|3181701|3181737|3174794|3174888|3184950|3185152	0.068	ENSMUSG00000005534|Insr|chr8|-|SE|3181701|3181737|3174794|3174888|3184950|3185152|POS
ENSMUSG00000019843|Fyn|chr10|+|MXE|39529436|39529601|39529918|39530074|39526780|39526930|39532015|39532195	0.068	ENSMUSG00000019843|Fyn|chr10|+|MXE|39529436|39529601|39529918|39530074|39526780|39526930|39532015|39532195|POS
ENSMUSG00000036986|Pml|chr9|-|SE|58221714|58221865|58218075|58220569|58229354|58229407	0.068	ENSMUSG00000036986|Pml|chr9|-|SE|58221714|58221865|58218075|58220569|58229354|58229407|POS
ENSMUSG00000021495|Fam193b|chr13|-|SE|55549117|55549357|55542783|55543789|55550223|55550407	0.068	ENSMUSG00000021495|Fam193b|chr13|-|SE|55549117|55549357|55542783|55543789|55550223|55550407|POS
ENSMUSG00000034908|Sidt2|chr9|-|SE|45946505|45946568|45945665|45945784|45946744|45946816	0.068	ENSMUSG00000034908|Sidt2|chr9|-|SE|45946505|45946568|45945665|45945784|45946744|45946816|POS
ENSMUSG00000031948|Kars|chr8|-|SE|112008481|112008539|112008206|112008386|112011209|112011266	0.068	ENSMUSG00000031948|Kars|chr8|-|SE|112008481|112008539|112008206|112008386|112011209|112011266|POS
ENSMUSG00000038170|Pde4dip|chr3|-|A5SS|97756369|97757096|97756883|97757096|97755438|97755597	0.068	ENSMUSG00000038170|Pde4dip|chr3|-|A5SS|97756369|97757096|97756883|97757096|97755438|97755597|POS
ENSMUSG00000003526|Prodh|chr16|-|RI|18077443|18077883|18077443|18077590|18077790|18077883	0.068	ENSMUSG00000003526|Prodh|chr16|-|RI|18077443|18077883|18077443|18077590|18077790|18077883|POS
ENSMUSG00000032407|U2surp|chr9|-|SE|95500687|95500819|95495834|95495933|95502539|95502584	0.069	ENSMUSG00000032407|U2surp|chr9|-|SE|95500687|95500819|95495834|95495933|95502539|95502584|POS
ENSMUSG00000022536|Glyr1|chr16|-|A3SS|5021337|5021448|5021337|5021430|5026507|5026607	0.069	ENSMUSG00000022536|Glyr1|chr16|-|A3SS|5021337|5021448|5021337|5021430|5026507|5026607|POS
ENSMUSG00000020807|4933427D14Rik|chr11|-|SE|72165516|72165598|72159399|72159520|72166637|72166823	0.069	ENSMUSG00000020807|4933427D14Rik|chr11|-|SE|72165516|72165598|72159399|72159520|72166637|72166823|POS
ENSMUSG00000027889|Ampd2|chr3|-|RI|108080266|108080774|108080266|108080335|108080643|108080774	0.069	ENSMUSG00000027889|Ampd2|chr3|-|RI|108080266|108080774|108080266|108080335|108080643|108080774|POS
ENSMUSG00000046679|C87436|chr6|+|SE|86454259|86454313|86453608|86453713|86457815|86457923	0.069	ENSMUSG00000046679|C87436|chr6|+|SE|86454259|86454313|86453608|86453713|86457815|86457923|POS
ENSMUSG00000026029|Casp8|chr1|+|SE|58803998|58804114|58802652|58802693|58823914|58824247	0.069	ENSMUSG00000026029|Casp8|chr1|+|SE|58803998|58804114|58802652|58802693|58823914|58824247|POS
ENSMUSG00000037266|Rsrp1|chr4|+|A3SS|134926025|134926818|134926734|134926818|134925776|134925821	0.069	ENSMUSG00000037266|Rsrp1|chr4|+|A3SS|134926025|134926818|134926734|134926818|134925776|134925821|POS
ENSMUSG00000031939|Taf1d|chr9|+|RI|15313989|15315131|15313989|15314264|15315101|15315131	0.07	ENSMUSG00000031939|Taf1d|chr9|+|RI|15313989|15315131|15313989|15314264|15315101|15315131|POS
ENSMUSG00000035835|Plppr3|chr10|-|RI|79866834|79867307|79866834|79867030|79867171|79867307	0.07	ENSMUSG00000035835|Plppr3|chr10|-|RI|79866834|79867307|79866834|79867030|79867171|79867307|POS
ENSMUSG00000027361|Gabpb1|chr2|-|SE|126662990|126663088|126658469|126658577|126675355|126675544	0.07	ENSMUSG00000027361|Gabpb1|chr2|-|SE|126662990|126663088|126658469|126658577|126675355|126675544|POS
ENSMUSG00000041939|Mvk|chr5|+|RI|114445387|114446306|114445387|114445479|114446158|114446306	0.07	ENSMUSG00000041939|Mvk|chr5|+|RI|114445387|114446306|114445387|114445479|114446158|114446306|POS
ENSMUSG00000025155|Dus1l|chr11|-|RI|120793027|120793946|120793027|120793110|120793833|120793946	0.071	ENSMUSG00000025155|Dus1l|chr11|-|RI|120793027|120793946|120793027|120793110|120793833|120793946|POS
ENSMUSG00000042625|Safb2|chr17|-|RI|56562938|56563431|56562938|56563243|56563361|56563431	0.071	ENSMUSG00000042625|Safb2|chr17|-|RI|56562938|56563431|56562938|56563243|56563361|56563431|POS
ENSMUSG00000021236|Entpd5|chr12|-|SE|84399339|84399412|84396678|84396958|84405405|84405475	0.071	ENSMUSG00000021236|Entpd5|chr12|-|SE|84399339|84399412|84396678|84396958|84405405|84405475|POS
ENSMUSG00000025571|Tnrc6c|chr11|+|RI|117749576|117753144|117749576|117749817|117752976|117753144	0.071	ENSMUSG00000025571|Tnrc6c|chr11|+|RI|117749576|117753144|117749576|117749817|117752976|117753144|POS
ENSMUSG00000030035|Wbp1|chr6|-|RI|83120184|83120876|83120184|83120287|83120771|83120876	0.071	ENSMUSG00000030035|Wbp1|chr6|-|RI|83120184|83120876|83120184|83120287|83120771|83120876|POS
ENSMUSG00000052752|Traf7|chr17|-|SE|24514712|24514829|24514124|24514217|24516504|24516596	0.071	ENSMUSG00000052752|Traf7|chr17|-|SE|24514712|24514829|24514124|24514217|24516504|24516596|POS
ENSMUSG00000031993|Snx19|chr9|+|RI|30432234|30433430|30432234|30432373|30433329|30433430	0.071	ENSMUSG00000031993|Snx19|chr9|+|RI|30432234|30433430|30432234|30432373|30433329|30433430|POS
ENSMUSG00000052384|Nrros|chr16|-|SE|32162237|32163397|32147552|32147673|32165379|32165476	0.071	ENSMUSG00000052384|Nrros|chr16|-|SE|32162237|32163397|32147552|32147673|32165379|32165476|POS
ENSMUSG00000066568|Lsm14a|chr7|-|SE|34347925|34347982|34344645|34345958|34351285|34351413	0.072	ENSMUSG00000066568|Lsm14a|chr7|-|SE|34347925|34347982|34344645|34345958|34351285|34351413|POS
ENSMUSG00000028106|Rprd2|chr3|-|SE|95786319|95786397|95785053|95785106|95787283|95787384	0.072	ENSMUSG00000028106|Rprd2|chr3|-|SE|95786319|95786397|95785053|95785106|95787283|95787384|POS
ENSMUSG00000014873|Surf2|chr2|+|RI|26917427|26919055|26917427|26917531|26918864|26919055	0.072	ENSMUSG00000014873|Surf2|chr2|+|RI|26917427|26919055|26917427|26917531|26918864|26919055|POS
ENSMUSG00000057101|Zfp180|chr7|+|SE|24086487|24086591|24085425|24085506|24097820|24097895	0.073	ENSMUSG00000057101|Zfp180|chr7|+|SE|24086487|24086591|24085425|24085506|24097820|24097895|POS
ENSMUSG00000029925|Tbxas1|chr6|+|RI|39080938|39083855|39080938|39081076|39083692|39083855	0.073	ENSMUSG00000029925|Tbxas1|chr6|+|RI|39080938|39083855|39080938|39081076|39083692|39083855|POS
ENSMUSG00000050144|Slc25a44|chr3|-|SE|88415987|88416115|88410497|88412897|88420500|88421138	0.073	ENSMUSG00000050144|Slc25a44|chr3|-|SE|88415987|88416115|88410497|88412897|88420500|88421138|POS
ENSMUSG00000028797|Tmem234|chr4|+|SE|129601406|129601625|129600982|129601134|129602194|129602261	0.073	ENSMUSG00000028797|Tmem234|chr4|+|SE|129601406|129601625|129600982|129601134|129602194|129602261|POS
ENSMUSG00000014959|Gorasp2|chr2|+|SE|70672564|70672761|70661575|70661760|70676464|70676545	0.074	ENSMUSG00000014959|Gorasp2|chr2|+|SE|70672564|70672761|70661575|70661760|70676464|70676545|POS
ENSMUSG00000029177|Cenpa|chr5|+|SE|30669691|30669828|30666896|30667113|30672463|30672570	0.074	ENSMUSG00000029177|Cenpa|chr5|+|SE|30669691|30669828|30666896|30667113|30672463|30672570|POS
ENSMUSG00000028859|Csf3r|chr4|+|MXE|126027188|126027316|126027316|126027400|126026080|126026179|126029762|126030062	0.075	ENSMUSG00000028859|Csf3r|chr4|+|MXE|126027188|126027316|126027316|126027400|126026080|126026179|126029762|126030062|POS
ENSMUSG00000059273|Zc3h4|chr7|+|SE|16432773|16433022|16429530|16429910|16434020|16437695	0.075	ENSMUSG00000059273|Zc3h4|chr7|+|SE|16432773|16433022|16429530|16429910|16434020|16437695|POS
ENSMUSG00000017478|Zc3h18|chr8|+|SE|122387692|122387764|122386861|122386946|122397817|122397966	0.075	ENSMUSG00000017478|Zc3h18|chr8|+|SE|122387692|122387764|122386861|122386946|122397817|122397966|POS
ENSMUSG00000031389|Arhgap4|chrX|-|A3SS|73905650|73905893|73905650|73905863|73906156|73906219	0.075	ENSMUSG00000031389|Arhgap4|chrX|-|A3SS|73905650|73905893|73905650|73905863|73906156|73906219|POS
ENSMUSG00000073468|Sft2d1|chr17|+|RI|8321799|8323335|8321799|8321835|8323276|8323335	0.076	ENSMUSG00000073468|Sft2d1|chr17|+|RI|8321799|8323335|8321799|8321835|8323276|8323335|POS
ENSMUSG00000073725|Lmbrd1|chr1|+|RI|24743882|24744358|24743882|24743947|24744255|24744358	0.076	ENSMUSG00000073725|Lmbrd1|chr1|+|RI|24743882|24744358|24743882|24743947|24744255|24744358|POS
ENSMUSG00000021156|Zmynd11|chr13|-|SE|9712982|9713027|9710145|9710307|9720772|9720932	0.077	ENSMUSG00000021156|Zmynd11|chr13|-|SE|9712982|9713027|9710145|9710307|9720772|9720932|POS
ENSMUSG00000037337|Map4k1|chr7|+|SE|29002347|29002403|29001919|29001990|29003096|29003274	0.077	ENSMUSG00000037337|Map4k1|chr7|+|SE|29002347|29002403|29001919|29001990|29003096|29003274|POS
ENSMUSG00000002820|Atg4d|chr9|+|RI|21268250|21268669|21268250|21268527|21268604|21268669	0.077	ENSMUSG00000002820|Atg4d|chr9|+|RI|21268250|21268669|21268250|21268527|21268604|21268669|POS
ENSMUSG00000020102|Slc16a7|chr10|-|SE|125298621|125298702|125294594|125294844|125301956|125302081	0.077	ENSMUSG00000020102|Slc16a7|chr10|-|SE|125298621|125298702|125294594|125294844|125301956|125302081|POS
ENSMUSG00000010608|Rbm25|chr12|+|SE|83639127|83639191|83632256|83632417|83642628|83642749	0.078	ENSMUSG00000010608|Rbm25|chr12|+|SE|83639127|83639191|83632256|83632417|83642628|83642749|POS
ENSMUSG00000053158|Fes|chr7|-|A3SS|80382312|80382431|80382312|80382396|80382520|80382707	0.078	ENSMUSG00000053158|Fes|chr7|-|A3SS|80382312|80382431|80382312|80382396|80382520|80382707|POS
ENSMUSG00000036860|Mrpl55|chr11|+|A3SS|59204534|59204757|59204555|59204757|59204171|59204255	0.078	ENSMUSG00000036860|Mrpl55|chr11|+|A3SS|59204534|59204757|59204555|59204757|59204171|59204255|POS
ENSMUSG00000029787|Avl9|chr6|+|A5SS|56730641|56730711|56730641|56730680|56735362|56735432	0.078	ENSMUSG00000029787|Avl9|chr6|+|A5SS|56730641|56730711|56730641|56730680|56735362|56735432|POS
ENSMUSG00000074064|Mlycd|chr8|+|RI|119401480|119402590|119401480|119401593|119402433|119402590	0.078	ENSMUSG00000074064|Mlycd|chr8|+|RI|119401480|119402590|119401480|119401593|119402433|119402590|POS
ENSMUSG00000024483|Ankhd1|chr18|+|A3SS|36655422|36655677|36655473|36655677|36654092|36654266	0.078	ENSMUSG00000024483|Ankhd1|chr18|+|A3SS|36655422|36655677|36655473|36655677|36654092|36654266|POS
ENSMUSG00000005417|Mprip|chr11|+|SE|59772151|59772217|59771616|59771702|59775515|59776223	0.079	ENSMUSG00000005417|Mprip|chr11|+|SE|59772151|59772217|59771616|59771702|59775515|59776223|POS
ENSMUSG00000056228|Cars2|chr8|-|A3SS|11530294|11530618|11530294|11530424|11537271|11537355	0.079	ENSMUSG00000056228|Cars2|chr8|-|A3SS|11530294|11530618|11530294|11530424|11537271|11537355|POS
ENSMUSG00000035401|Emsy|chr7|-|SE|98602582|98602747|98600671|98600827|98610666|98610865	0.079	ENSMUSG00000035401|Emsy|chr7|-|SE|98602582|98602747|98600671|98600827|98610666|98610865|POS
ENSMUSG00000042133|Ppig|chr2|+|SE|69731490|69731580|69722902|69722957|69731745|69731813	0.079	ENSMUSG00000042133|Ppig|chr2|+|SE|69731490|69731580|69722902|69722957|69731745|69731813|POS
ENSMUSG00000032067|Pts|chr9|-|A3SS|50524722|50524964|50524722|50524779|50525261|50525284	0.079	ENSMUSG00000032067|Pts|chr9|-|A3SS|50524722|50524964|50524722|50524779|50525261|50525284|POS
ENSMUSG00000021916|Glt8d1|chr14|+|RI|31009734|31010165|31009734|31009852|31010080|31010165	0.079	ENSMUSG00000021916|Glt8d1|chr14|+|RI|31009734|31010165|31009734|31009852|31010080|31010165|POS
ENSMUSG00000042508|Dmtf1|chr5|-|A3SS|9130367|9130693|9130367|9130477|9131275|9131308	0.079	ENSMUSG00000042508|Dmtf1|chr5|-|A3SS|9130367|9130693|9130367|9130477|9131275|9131308|POS
ENSMUSG00000066037|Hnrnpr|chr4|+|SE|136314086|136314255|136310967|136311089|136316360|136316479	0.079	ENSMUSG00000066037|Hnrnpr|chr4|+|SE|136314086|136314255|136310967|136311089|136316360|136316479|POS
ENSMUSG00000026672|Optn|chr2|-|RI|5020641|5021481|5020641|5021228|5021322|5021481	0.08	ENSMUSG00000026672|Optn|chr2|-|RI|5020641|5021481|5020641|5021228|5021322|5021481|POS
ENSMUSG00000000759|Tubgcp3|chr8|-|RI|12648620|12649822|12648620|12648787|12649689|12649822	0.08	ENSMUSG00000000759|Tubgcp3|chr8|-|RI|12648620|12649822|12648620|12648787|12649689|12649822|POS
ENSMUSG00000060261|Gtf2i|chr5|-|SE|134272523|134272586|134266542|134266656|134274538|134274595	0.08	ENSMUSG00000060261|Gtf2i|chr5|-|SE|134272523|134272586|134266542|134266656|134274538|134274595|POS
ENSMUSG00000033819|Ppp1r16a|chr15|+|RI|76692836|76693138|76692836|76692940|76693013|76693138	0.081	ENSMUSG00000033819|Ppp1r16a|chr15|+|RI|76692836|76693138|76692836|76692940|76693013|76693138|POS
ENSMUSG00000023977|Ubr2|chr17|-|RI|46980319|46981442|46980319|46980418|46981353|46981442	0.081	ENSMUSG00000023977|Ubr2|chr17|-|RI|46980319|46981442|46980319|46980418|46981353|46981442|POS
ENSMUSG00000006589|Aprt|chr8|-|RI|122576118|122576621|122576118|122576252|122576514|122576621	0.081	ENSMUSG00000006589|Aprt|chr8|-|RI|122576118|122576621|122576118|122576252|122576514|122576621|POS
ENSMUSG00000016940|Kctd2|chr11|+|RI|115429279|115431274|115429279|115429405|115430312|115431274	0.081	ENSMUSG00000016940|Kctd2|chr11|+|RI|115429279|115431274|115429279|115429405|115430312|115431274|POS
ENSMUSG00000000826|Dnajc5|chr2|+|SE|181548925|181549000|181548669|181548841|181549272|181552249	0.082	ENSMUSG00000000826|Dnajc5|chr2|+|SE|181548925|181549000|181548669|181548841|181549272|181552249|POS
ENSMUSG00000066037|Hnrnpr|chr4|+|SE|136314089|136314255|136310967|136311089|136316360|136316423	0.082	ENSMUSG00000066037|Hnrnpr|chr4|+|SE|136314089|136314255|136310967|136311089|136316360|136316423|POS
ENSMUSG00000028468|Rgp1|chr4|+|A5SS|43579374|43579509|43579374|43579424|43579886|43580023	0.082	ENSMUSG00000028468|Rgp1|chr4|+|A5SS|43579374|43579509|43579374|43579424|43579886|43580023|POS
ENSMUSG00000037720|Tmem33|chr5|+|RI|67286095|67291461|67286095|67286216|67287009|67291461	0.083	ENSMUSG00000037720|Tmem33|chr5|+|RI|67286095|67291461|67286095|67286216|67287009|67291461|POS
ENSMUSG00000052423|B4galt3|chr1|+|A3SS|171271706|171272001|171271827|171272001|171271202|171271373	0.083	ENSMUSG00000052423|B4galt3|chr1|+|A3SS|171271706|171272001|171271827|171272001|171271202|171271373|POS
ENSMUSG00000042831|Alkbh6|chr7|+|RI|30312236|30312707|30312236|30312388|30312505|30312707	0.083	ENSMUSG00000042831|Alkbh6|chr7|+|RI|30312236|30312707|30312236|30312388|30312505|30312707|POS
ENSMUSG00000027639|Samhd1|chr2|-|RI|157099400|157101443|157099400|157099503|157101320|157101443	0.083	ENSMUSG00000027639|Samhd1|chr2|-|RI|157099400|157101443|157099400|157099503|157101320|157101443|POS
ENSMUSG00000020231|Dip2a|chr10|-|RI|76279705|76279966|76279705|76279786|76279856|76279966	0.083	ENSMUSG00000020231|Dip2a|chr10|-|RI|76279705|76279966|76279705|76279786|76279856|76279966|POS
ENSMUSG00000022721|Trmt2a|chr16|+|RI|18250819|18251660|18250819|18251001|18251548|18251660	0.083	ENSMUSG00000022721|Trmt2a|chr16|+|RI|18250819|18251660|18250819|18251001|18251548|18251660|POS
ENSMUSG00000028134|Ptbp2|chr3|-|SE|119724611|119724645|119724093|119724186|119726065|119726205	0.083	ENSMUSG00000028134|Ptbp2|chr3|-|SE|119724611|119724645|119724093|119724186|119726065|119726205|POS
ENSMUSG00000027680|Fxr1|chr3|+|SE|34068160|34068252|34064118|34064319|34068916|34069342	0.084	ENSMUSG00000027680|Fxr1|chr3|+|SE|34068160|34068252|34064118|34064319|34068916|34069342|POS
ENSMUSG00000026074|Map4k4|chr1|+|SE|40003762|40003987|40000530|40000749|40004806|40004910	0.084	ENSMUSG00000026074|Map4k4|chr1|+|SE|40003762|40003987|40000530|40000749|40004806|40004910|POS
ENSMUSG00000011958|Bnip2|chr9|+|SE|70004305|70004341|70003568|70003667|70007063|70008317	0.084	ENSMUSG00000011958|Bnip2|chr9|+|SE|70004305|70004341|70003568|70003667|70007063|70008317|POS
ENSMUSG00000022744|Cldnd1|chr16|+|SE|58732580|58732718|58731268|58731412|58732838|58732989	0.084	ENSMUSG00000022744|Cldnd1|chr16|+|SE|58732580|58732718|58731268|58731412|58732838|58732989|POS
ENSMUSG00000046897|Zfp740|chr15|+|SE|102205228|102205305|102204570|102205086|102207770|102207920	0.085	ENSMUSG00000046897|Zfp740|chr15|+|SE|102205228|102205305|102204570|102205086|102207770|102207920|POS
ENSMUSG00000024579|Pcyox1l|chr18|-|SE|61703345|61703394|61702195|61702370|61703511|61703718	0.085	ENSMUSG00000024579|Pcyox1l|chr18|-|SE|61703345|61703394|61702195|61702370|61703511|61703718|POS
ENSMUSG00000057181|5730455P16Rik|chr11|-|A5SS|80377753|80378034|80377841|80378034|80376802|80376883	0.085	ENSMUSG00000057181|5730455P16Rik|chr11|-|A5SS|80377753|80378034|80377841|80378034|80376802|80376883|POS
ENSMUSG00000057177|Gsk3a|chr7|-|RI|25229464|25230040|25229464|25229572|25229850|25230040	0.086	ENSMUSG00000057177|Gsk3a|chr7|-|RI|25229464|25230040|25229464|25229572|25229850|25230040|POS
ENSMUSG00000032228|Tcf12|chr9|-|SE|71868998|71869070|71868071|71868278|71870073|71870147	0.086	ENSMUSG00000032228|Tcf12|chr9|-|SE|71868998|71869070|71868071|71868278|71870073|71870147|POS
ENSMUSG00000046897|Zfp740|chr15|+|A5SS|102204570|102205086|102204570|102204883|102207770|102207920	0.086	ENSMUSG00000046897|Zfp740|chr15|+|A5SS|102204570|102205086|102204570|102204883|102207770|102207920|POS
ENSMUSG00000040242|Fgfr1op2|chr6|+|SE|146592633|146592747|146589893|146590036|146595175|146595289	0.087	ENSMUSG00000040242|Fgfr1op2|chr6|+|SE|146592633|146592747|146589893|146590036|146595175|146595289|POS
ENSMUSG00000040732|Erg|chr16|-|SE|95369994|95370063|95369321|95369378|95377300|95377372	0.087	ENSMUSG00000040732|Erg|chr16|-|SE|95369994|95370063|95369321|95369378|95377300|95377372|POS
ENSMUSG00000025280|Polr3a|chr14|-|RI|24452192|24452675|24452192|24452324|24452510|24452675	0.087	ENSMUSG00000025280|Polr3a|chr14|-|RI|24452192|24452675|24452192|24452324|24452510|24452675|POS
ENSMUSG00000030016|Zfp638|chr6|+|SE|83981683|83981785|83978993|83979909|83983975|83984074	0.087	ENSMUSG00000030016|Zfp638|chr6|+|SE|83981683|83981785|83978993|83979909|83983975|83984074|POS
ENSMUSG00000038241|Cep250|chr2|+|RI|155988311|155989620|155988311|155988432|155989498|155989620	0.087	ENSMUSG00000038241|Cep250|chr2|+|RI|155988311|155989620|155988311|155988432|155989498|155989620|POS
ENSMUSG00000029221|Slc30a9|chr5|+|SE|67324673|67324733|67315677|67315845|67326852|67326952	0.088	ENSMUSG00000029221|Slc30a9|chr5|+|SE|67324673|67324733|67315677|67315845|67326852|67326952|POS
ENSMUSG00000040345|Arhgap9|chr10|+|SE|127324344|127324459|127323706|127323830|127325118|127325199	0.088	ENSMUSG00000040345|Arhgap9|chr10|+|SE|127324344|127324459|127323706|127323830|127325118|127325199|POS
ENSMUSG00000022779|Top3b|chr16|+|SE|16875068|16875155|16870839|16871055|16877831|16878016	0.088	ENSMUSG00000022779|Top3b|chr16|+|SE|16875068|16875155|16870839|16871055|16877831|16878016|POS
ENSMUSG00000020654|Adcy3|chr12|+|RI|4210771|4211605|4210771|4210891|4211481|4211605	0.089	ENSMUSG00000020654|Adcy3|chr12|+|RI|4210771|4211605|4210771|4210891|4211481|4211605|POS
ENSMUSG00000035953|Pip4p1|chr14|-|RI|50929005|50929307|50929005|50929058|50929201|50929307	0.089	ENSMUSG00000035953|Pip4p1|chr14|-|RI|50929005|50929307|50929005|50929058|50929201|50929307|POS
ENSMUSG00000030678|Maz|chr7|-|SE|127023481|127023706|127022129|127023168|127024443|127024615	0.089	ENSMUSG00000030678|Maz|chr7|-|SE|127023481|127023706|127022129|127023168|127024443|127024615|POS
ENSMUSG00000028797|Tmem234|chr4|+|A5SS|129600982|129601243|129600982|129601134|129602194|129602261	0.089	ENSMUSG00000028797|Tmem234|chr4|+|A5SS|129600982|129601243|129600982|129601134|129602194|129602261|POS
ENSMUSG00000030590|Fam98c|chr7|-|RI|29153321|29154535|29153321|29153489|29154418|29154535	0.09	ENSMUSG00000030590|Fam98c|chr7|-|RI|29153321|29154535|29153321|29153489|29154418|29154535|POS
ENSMUSG00000046836|Brox|chr1|-|SE|183292474|183292625|183291906|183292003|183294333|183294450	0.091	ENSMUSG00000046836|Brox|chr1|-|SE|183292474|183292625|183291906|183292003|183294333|183294450|POS
ENSMUSG00000039176|Polg|chr7|-|RI|79454038|79454711|79454038|79454174|79454593|79454711	0.091	ENSMUSG00000039176|Polg|chr7|-|RI|79454038|79454711|79454038|79454174|79454593|79454711|POS
ENSMUSG00000022568|Scrib|chr15|-|SE|76049456|76049540|76049202|76049301|76050049|76050112	0.091	ENSMUSG00000022568|Scrib|chr15|-|SE|76049456|76049540|76049202|76049301|76050049|76050112|POS
ENSMUSG00000042508|Dmtf1|chr5|-|A3SS|9130367|9130652|9130367|9130477|9131275|9131308	0.091	ENSMUSG00000042508|Dmtf1|chr5|-|A3SS|9130367|9130652|9130367|9130477|9131275|9131308|POS
ENSMUSG00000058440|Nrf1|chr6|+|SE|30090268|30090304|30089894|30090146|30095339|30095346	0.092	ENSMUSG00000058440|Nrf1|chr6|+|SE|30090268|30090304|30089894|30090146|30095339|30095346|POS
ENSMUSG00000036086|Zranb3|chr1|-|SE|127965780|127966333|127965130|127965164|127967877|127967964	0.092	ENSMUSG00000036086|Zranb3|chr1|-|SE|127965780|127966333|127965130|127965164|127967877|127967964|POS
ENSMUSG00000071074|Yipf3|chr17|+|RI|46251113|46251487|46251113|46251227|46251363|46251487	0.092	ENSMUSG00000071074|Yipf3|chr17|+|RI|46251113|46251487|46251113|46251227|46251363|46251487|POS
ENSMUSG00000053158|Fes|chr7|-|RI|80380208|80380892|80380208|80380327|80380838|80380892	0.092	ENSMUSG00000053158|Fes|chr7|-|RI|80380208|80380892|80380208|80380327|80380838|80380892|POS
ENSMUSG00000040446|Rprd1a|chr18|-|RI|24507104|24508091|24507104|24507231|24507993|24508091	0.093	ENSMUSG00000040446|Rprd1a|chr18|-|RI|24507104|24508091|24507104|24507231|24507993|24508091|POS
ENSMUSG00000021709|Erbin|chr13|-|MXE|103827906|103828023|103830187|103830331|103824719|103824926|103833497|103835028	0.093	ENSMUSG00000021709|Erbin|chr13|-|MXE|103827906|103828023|103830187|103830331|103824719|103824926|103833497|103835028|POS
ENSMUSG00000040356|Skiv2l|chr17|-|RI|34846026|34846667|34846026|34846173|34846521|34846667	0.094	ENSMUSG00000040356|Skiv2l|chr17|-|RI|34846026|34846667|34846026|34846173|34846521|34846667|POS
ENSMUSG00000057110|Cntrl|chr2|+|RI|35175537|35176322|35175537|35175600|35176127|35176322	0.095	ENSMUSG00000057110|Cntrl|chr2|+|RI|35175537|35176322|35175537|35175600|35176127|35176322|POS
ENSMUSG00000032567|Aste1|chr9|+|RI|105396544|105397858|105396544|105396705|105396797|105397858	0.095	ENSMUSG00000032567|Aste1|chr9|+|RI|105396544|105397858|105396544|105396705|105396797|105397858|POS
ENSMUSG00000017756|Slc12a7|chr13|+|RI|73806028|73806437|73806028|73806198|73806305|73806437	0.095	ENSMUSG00000017756|Slc12a7|chr13|+|RI|73806028|73806437|73806028|73806198|73806305|73806437|POS
ENSMUSG00000026767|Mindy3|chr2|-|SE|12400022|12400137|12397492|12397566|12405859|12405920	0.095	ENSMUSG00000026767|Mindy3|chr2|-|SE|12400022|12400137|12397492|12397566|12405859|12405920|POS
ENSMUSG00000037300|Ttc13|chr8|-|SE|124697993|124698086|124695635|124695752|124699655|124699721	0.097	ENSMUSG00000037300|Ttc13|chr8|-|SE|124697993|124698086|124695635|124695752|124699655|124699721|POS
ENSMUSG00000033075|Senp1|chr15|-|SE|98076911|98077042|98076549|98076709|98082242|98082327	0.097	ENSMUSG00000033075|Senp1|chr15|-|SE|98076911|98077042|98076549|98076709|98082242|98082327|POS
ENSMUSG00000024811|Tnks2|chr19|+|SE|36876184|36876373|36875263|36875373|36879234|36879487	0.097	ENSMUSG00000024811|Tnks2|chr19|+|SE|36876184|36876373|36875263|36875373|36879234|36879487|POS
ENSMUSG00000020076|Ddx50|chr10|-|SE|62647533|62647643|62645990|62647201|62651024|62651203	0.098	ENSMUSG00000020076|Ddx50|chr10|-|SE|62647533|62647643|62645990|62647201|62651024|62651203|POS
ENSMUSG00000004864|Mapk13|chr17|+|RI|28776134|28776416|28776134|28776182|28776301|28776416	0.098	ENSMUSG00000004864|Mapk13|chr17|+|RI|28776134|28776416|28776134|28776182|28776301|28776416|POS
ENSMUSG00000020268|Lyrm7|chr11|-|A3SS|54848578|54849396|54848578|54848660|54850344|54850415	0.098	ENSMUSG00000020268|Lyrm7|chr11|-|A3SS|54848578|54849396|54848578|54848660|54850344|54850415|POS
ENSMUSG00000031833|Mast3|chr8|-|SE|70796712|70796802|70789996|70790085|70799457|70799489	0.098	ENSMUSG00000031833|Mast3|chr8|-|SE|70796712|70796802|70789996|70790085|70799457|70799489|POS
ENSMUSG00000059552|Trp53|chr11|+|A3SS|69591253|69591872|69591349|69591872|69590655|69590762	0.099	ENSMUSG00000059552|Trp53|chr11|+|A3SS|69591253|69591872|69591349|69591872|69590655|69590762|POS
ENSMUSG00000034525|Ice1|chr13|-|RI|70618984|70620769|70618984|70619061|70620657|70620769	0.099	ENSMUSG00000034525|Ice1|chr13|-|RI|70618984|70620769|70618984|70619061|70620657|70620769|POS
ENSMUSG00000033191|Tie1|chr4|-|RI|118478861|118479903|118478861|118479152|118479612|118479903	0.099	ENSMUSG00000033191|Tie1|chr4|-|RI|118478861|118479903|118478861|118479152|118479612|118479903|POS
ENSMUSG00000032316|Clk3|chr9|-|RI|57758626|57761040|57758626|57758723|57760823|57761040	0.099	ENSMUSG00000032316|Clk3|chr9|-|RI|57758626|57761040|57758626|57758723|57760823|57761040|POS
ENSMUSG00000042446|Zmym4|chr4|-|SE|126906520|126906636|126905871|126906147|126910789|126911002	0.099	ENSMUSG00000042446|Zmym4|chr4|-|SE|126906520|126906636|126905871|126906147|126910789|126911002|POS
ENSMUSG00000028621|Cyb5rl|chr4|+|SE|107069095|107069196|107068642|107068823|107070869|107071018	0.099	ENSMUSG00000028621|Cyb5rl|chr4|+|SE|107069095|107069196|107068642|107068823|107070869|107071018|POS
ENSMUSG00000070000|Fcho1|chr8|-|RI|71708925|71709385|71708925|71709090|71709329|71709385	0.099	ENSMUSG00000070000|Fcho1|chr8|-|RI|71708925|71709385|71708925|71709090|71709329|71709385|POS
ENSMUSG00000029068|Ccnl2|chr4|+|SE|155818538|155818664|155817922|155817987|155820328|155820428	0.1	ENSMUSG00000029068|Ccnl2|chr4|+|SE|155818538|155818664|155817922|155817987|155820328|155820428|POS
ENSMUSG00000026034|Clk1|chr1|-|RI|58417012|58417383|58417012|58417179|58417266|58417383	0.1	ENSMUSG00000026034|Clk1|chr1|-|RI|58417012|58417383|58417012|58417179|58417266|58417383|POS
ENSMUSG00000006179|Prss16|chr13|-|RI|22002925|22003325|22002925|22003071|22003145|22003325	0.1	ENSMUSG00000006179|Prss16|chr13|-|RI|22002925|22003325|22002925|22003071|22003145|22003325|POS
ENSMUSG00000026219|Trip12|chr1|-|SE|84795689|84795815|84793524|84794327|84814822|84814969	0.101	ENSMUSG00000026219|Trip12|chr1|-|SE|84795689|84795815|84793524|84794327|84814822|84814969|POS
ENSMUSG00000028608|0610037L13Rik|chr4|+|RI|107894872|107897118|107894872|107894938|107896870|107897118	0.101	ENSMUSG00000028608|0610037L13Rik|chr4|+|RI|107894872|107897118|107894872|107894938|107896870|107897118|POS
ENSMUSG00000038679|Trps1|chr15|-|RI|50830828|50831958|50830828|50831006|50831606|50831958	0.101	ENSMUSG00000038679|Trps1|chr15|-|RI|50830828|50831958|50830828|50831006|50831606|50831958|POS
ENSMUSG00000007411|Mark3|chr12|+|RI|111628189|111629115|111628189|111628302|111628961|111629115	0.101	ENSMUSG00000007411|Mark3|chr12|+|RI|111628189|111629115|111628189|111628302|111628961|111629115|POS
ENSMUSG00000073434|Wdr90|chr17|-|RI|25854529|25855234|25854529|25854765|25855117|25855234	0.101	ENSMUSG00000073434|Wdr90|chr17|-|RI|25854529|25855234|25854529|25854765|25855117|25855234|POS
ENSMUSG00000031816|Mthfsd|chr8|-|MXE|121105573|121105687|121105717|121105831|121104391|121104558|121106869|121106973	0.102	ENSMUSG00000031816|Mthfsd|chr8|-|MXE|121105573|121105687|121105717|121105831|121104391|121104558|121106869|121106973|POS
ENSMUSG00000035597|Prpf39|chr12|+|SE|65043714|65043877|65043326|65043357|65044005|65044124	0.102	ENSMUSG00000035597|Prpf39|chr12|+|SE|65043714|65043877|65043326|65043357|65044005|65044124|POS
ENSMUSG00000022779|Top3b|chr16|+|SE|16875071|16875155|16870786|16871055|16877831|16878016	0.102	ENSMUSG00000022779|Top3b|chr16|+|SE|16875071|16875155|16870786|16871055|16877831|16878016|POS
ENSMUSG00000042323|Pbrm1|chr14|+|SE|31110414|31110579|31107108|31107310|31117012|31117083	0.104	ENSMUSG00000042323|Pbrm1|chr14|+|SE|31110414|31110579|31107108|31107310|31117012|31117083|POS
ENSMUSG00000021431|Snrnp48|chr13|+|RI|38217373|38220776|38217373|38217495|38220687|38220776	0.105	ENSMUSG00000021431|Snrnp48|chr13|+|RI|38217373|38220776|38217373|38217495|38220687|38220776|POS
ENSMUSG00000032067|Pts|chr9|-|SE|50528023|50528232|50526869|50526949|50528556|50528638	0.106	ENSMUSG00000032067|Pts|chr9|-|SE|50528023|50528232|50526869|50526949|50528556|50528638|POS
ENSMUSG00000020776|Fbf1|chr11|-|SE|116157291|116157498|116155957|116156035|116157688|116157827	0.106	ENSMUSG00000020776|Fbf1|chr11|-|SE|116157291|116157498|116155957|116156035|116157688|116157827|POS
ENSMUSG00000032525|Nktr|chr9|+|SE|121738387|121738415|121731477|121731565|121741121|121741151	0.106	ENSMUSG00000032525|Nktr|chr9|+|SE|121738387|121738415|121731477|121731565|121741121|121741151|POS
ENSMUSG00000006589|Aprt|chr8|-|SE|122575880|122576006|122575401|122575535|122576118|122576231	0.106	ENSMUSG00000006589|Aprt|chr8|-|SE|122575880|122576006|122575401|122575535|122576118|122576231|POS
ENSMUSG00000029068|Ccnl2|chr4|+|RI|155817922|155820428|155817922|155817987|155820328|155820428	0.107	ENSMUSG00000029068|Ccnl2|chr4|+|RI|155817922|155820428|155817922|155817987|155820328|155820428|POS
ENSMUSG00000060601|Nr1h2|chr7|-|A3SS|44551954|44552343|44551954|44552245|44552506|44552620	0.107	ENSMUSG00000060601|Nr1h2|chr7|-|A3SS|44551954|44552343|44551954|44552245|44552506|44552620|POS
ENSMUSG00000003929|Zfp81|chr17|-|SE|33338100|33338251|33336721|33336848|33358733|33358868	0.107	ENSMUSG00000003929|Zfp81|chr17|-|SE|33338100|33338251|33336721|33336848|33358733|33358868|POS
ENSMUSG00000035401|Emsy|chr7|-|SE|98602582|98602747|98597045|98597184|98610666|98610865	0.107	ENSMUSG00000035401|Emsy|chr7|-|SE|98602582|98602747|98597045|98597184|98610666|98610865|POS
ENSMUSG00000035621|Midn|chr10|+|SE|80153590|80153719|80151660|80151723|80153815|80153868	0.107	ENSMUSG00000035621|Midn|chr10|+|SE|80153590|80153719|80151660|80151723|80153815|80153868|POS
ENSMUSG00000026946|Nmi|chr2|-|SE|51972587|51972627|51960570|51960660|51972908|51973004	0.108	ENSMUSG00000026946|Nmi|chr2|-|SE|51972587|51972627|51960570|51960660|51972908|51973004|POS
ENSMUSG00000021709|Erbin|chr13|-|SE|103830187|103830331|103827906|103828023|103833497|103835028	0.108	ENSMUSG00000021709|Erbin|chr13|-|SE|103830187|103830331|103827906|103828023|103833497|103835028|POS
ENSMUSG00000036676|Tmtc3|chr10|-|SE|100485050|100485185|100477975|100478022|100487161|100487326	0.109	ENSMUSG00000036676|Tmtc3|chr10|-|SE|100485050|100485185|100477975|100478022|100487161|100487326|POS
ENSMUSG00000037426|Depdc5|chr5|+|A3SS|32937520|32937704|32937547|32937704|32933949|32934015	0.109	ENSMUSG00000037426|Depdc5|chr5|+|A3SS|32937520|32937704|32937547|32937704|32933949|32934015|POS
ENSMUSG00000024566|Atp9b|chr18|-|SE|80736811|80736844|80734140|80736149|80738652|80738781	0.109	ENSMUSG00000024566|Atp9b|chr18|-|SE|80736811|80736844|80734140|80736149|80738652|80738781|POS
ENSMUSG00000001750|Tcirg1|chr19|-|RI|3901890|3902556|3901890|3902035|3902343|3902556	0.109	ENSMUSG00000001750|Tcirg1|chr19|-|RI|3901890|3902556|3901890|3902035|3902343|3902556|POS
ENSMUSG00000020069|Hnrnph3|chr10|-|SE|63018759|63018898|63018040|63018225|63019392|63019527	0.11	ENSMUSG00000020069|Hnrnph3|chr10|-|SE|63018759|63018898|63018040|63018225|63019392|63019527|POS
ENSMUSG00000030263|Lrmp|chr6|+|RI|145137459|145138086|145137459|145137607|145138045|145138086	0.11	ENSMUSG00000030263|Lrmp|chr6|+|RI|145137459|145138086|145137459|145137607|145138045|145138086|POS
ENSMUSG00000027778|Ift80|chr3|-|RI|68990741|68994582|68990741|68990963|68994500|68994582	0.11	ENSMUSG00000027778|Ift80|chr3|-|RI|68990741|68994582|68990741|68990963|68994500|68994582|POS
ENSMUSG00000032519|Slc25a38|chr9|+|SE|120119882|120120005|120117452|120117537|120120256|120120436	0.11	ENSMUSG00000032519|Slc25a38|chr9|+|SE|120119882|120120005|120117452|120117537|120120256|120120436|POS
ENSMUSG00000021375|Kif13a|chr13|-|SE|46750701|46750773|46750512|46750626|46752080|46752543	0.111	ENSMUSG00000021375|Kif13a|chr13|-|SE|46750701|46750773|46750512|46750626|46752080|46752543|POS
ENSMUSG00000029775|Klhdc10|chr6|+|SE|30427708|30427795|30401895|30402150|30439643|30439865	0.111	ENSMUSG00000029775|Klhdc10|chr6|+|SE|30427708|30427795|30401895|30402150|30439643|30439865|POS
ENSMUSG00000042348|Arl15|chr13|+|SE|113901002|113901153|113794592|113794696|113922246|113922391	0.111	ENSMUSG00000042348|Arl15|chr13|+|SE|113901002|113901153|113794592|113794696|113922246|113922391|POS
ENSMUSG00000030556|Lrrc28|chr7|-|SE|67622570|67622597|67619073|67619111|67628294|67628335	0.111	ENSMUSG00000030556|Lrrc28|chr7|-|SE|67622570|67622597|67619073|67619111|67628294|67628335|POS
ENSMUSG00000052752|Traf7|chr17|-|SE|24514712|24514866|24514124|24514217|24516504|24516596	0.112	ENSMUSG00000052752|Traf7|chr17|-|SE|24514712|24514866|24514124|24514217|24516504|24516596|POS
ENSMUSG00000015697|Setdb1|chr3|-|RI|95337148|95339032|95337148|95337265|95338345|95339032	0.112	ENSMUSG00000015697|Setdb1|chr3|-|RI|95337148|95339032|95337148|95337265|95338345|95339032|POS
ENSMUSG00000032534|Cep63|chr9|-|SE|102621695|102621728|102619691|102619760|102626262|102626509	0.112	ENSMUSG00000032534|Cep63|chr9|-|SE|102621695|102621728|102619691|102619760|102626262|102626509|POS
ENSMUSG00000032366|Tpm1|chr9|-|MXE|67031950|67032026|67032465|67032541|67031451|67031514|67032793|67032864	0.113	ENSMUSG00000032366|Tpm1|chr9|-|MXE|67031950|67032026|67032465|67032541|67031451|67031514|67032793|67032864|POS
ENSMUSG00000022884|Eif4a2|chr16|+|SE|23112350|23112457|23111816|23111896|23113166|23113184	0.113	ENSMUSG00000022884|Eif4a2|chr16|+|SE|23112350|23112457|23111816|23111896|23113166|23113184|POS
ENSMUSG00000038084|Opa1|chr16|+|SE|29597585|29597696|29589680|29589748|29602211|29602265	0.113	ENSMUSG00000038084|Opa1|chr16|+|SE|29597585|29597696|29589680|29589748|29602211|29602265|POS
ENSMUSG00000030761|Myo7a|chr7|-|A3SS|98065611|98065895|98065611|98065781|98066340|98066467	0.113	ENSMUSG00000030761|Myo7a|chr7|-|A3SS|98065611|98065895|98065611|98065781|98066340|98066467|POS
ENSMUSG00000038271|Iffo1|chr6|+|RI|125153041|125153502|125153041|125153162|125153406|125153502	0.113	ENSMUSG00000038271|Iffo1|chr6|+|RI|125153041|125153502|125153041|125153162|125153406|125153502|POS
ENSMUSG00000097431|Gm26782|chr14|+|SE|50874913|50874962|50870362|50870556|50876671|50876820	0.113	ENSMUSG00000097431|Gm26782|chr14|+|SE|50874913|50874962|50870362|50870556|50876671|50876820|POS
ENSMUSG00000035293|G2e3|chr12|+|SE|51363951|51364020|51363416|51363546|51365254|51365559	0.114	ENSMUSG00000035293|G2e3|chr12|+|SE|51363951|51364020|51363416|51363546|51365254|51365559|POS
ENSMUSG00000021241|Isca2|chr12|+|SE|84773792|84773908|84773306|84773677|84774542|84774804	0.114	ENSMUSG00000021241|Isca2|chr12|+|SE|84773792|84773908|84773306|84773677|84774542|84774804|POS
ENSMUSG00000037808|Fam76b|chr9|+|SE|13836658|13836716|13836102|13836183|13836836|13836972	0.114	ENSMUSG00000037808|Fam76b|chr9|+|SE|13836658|13836716|13836102|13836183|13836836|13836972|POS
ENSMUSG00000032316|Clk3|chr9|-|RI|57758283|57761040|57758283|57758350|57758626|57761040	0.114	ENSMUSG00000032316|Clk3|chr9|-|RI|57758283|57761040|57758283|57758350|57758626|57761040|POS
ENSMUSG00000032407|U2surp|chr9|-|SE|95500687|95500873|95495834|95495933|95502539|95502584	0.115	ENSMUSG00000032407|U2surp|chr9|-|SE|95500687|95500873|95495834|95495933|95502539|95502584|POS
ENSMUSG00000033857|Engase|chr11|+|RI|118485756|118486553|118485756|118485905|118486444|118486553	0.115	ENSMUSG00000033857|Engase|chr11|+|RI|118485756|118486553|118485756|118485905|118486444|118486553|POS
ENSMUSG00000068206|Pick1|chr15|+|RI|79247264|79248296|79247264|79247315|79248151|79248296	0.115	ENSMUSG00000068206|Pick1|chr15|+|RI|79247264|79248296|79247264|79247315|79248151|79248296|POS
ENSMUSG00000025227|Mfsd13a|chr19|+|SE|46371935|46372107|46369236|46369333|46372181|46372375	0.116	ENSMUSG00000025227|Mfsd13a|chr19|+|SE|46371935|46372107|46369236|46369333|46372181|46372375|POS
ENSMUSG00000026199|Ankzf1|chr1|+|RI|75195062|75195712|75195062|75195256|75195599|75195712	0.116	ENSMUSG00000026199|Ankzf1|chr1|+|RI|75195062|75195712|75195062|75195256|75195599|75195712|POS
ENSMUSG00000050565|Tor1aip2|chr1|+|SE|156041074|156041134|156040916|156041002|156051293|156051623	0.117	ENSMUSG00000050565|Tor1aip2|chr1|+|SE|156041074|156041134|156040916|156041002|156051293|156051623|POS
ENSMUSG00000033105|Lss|chr10|+|RI|76544464|76545501|76544464|76544536|76545450|76545501	0.117	ENSMUSG00000033105|Lss|chr10|+|RI|76544464|76545501|76544464|76544536|76545450|76545501|POS
ENSMUSG00000029471|Camkk2|chr5|-|SE|122742099|122742228|122737432|122737533|122743869|122743957	0.118	ENSMUSG00000029471|Camkk2|chr5|-|SE|122742099|122742228|122737432|122737533|122743869|122743957|POS
ENSMUSG00000034327|Kctd9|chr14|+|A3SS|67729223|67729409|67729350|67729409|67728649|67728746	0.118	ENSMUSG00000034327|Kctd9|chr14|+|A3SS|67729223|67729409|67729350|67729409|67728649|67728746|POS
ENSMUSG00000030704|Rab6a|chr7|+|MXE|100629665|100629771|100629837|100629943|100628403|100628457|100631741|100631853	0.119	ENSMUSG00000030704|Rab6a|chr7|+|MXE|100629665|100629771|100629837|100629943|100628403|100628457|100631741|100631853|POS
ENSMUSG00000027523|Gnas|chr2|+|SE|174336746|174336791|174334211|174334284|174341652|174341707	0.119	ENSMUSG00000027523|Gnas|chr2|+|SE|174336746|174336791|174334211|174334284|174341652|174341707|POS
ENSMUSG00000029068|Ccnl2|chr4|+|A3SS|155818538|155820428|155820328|155820428|155817922|155817987	0.12	ENSMUSG00000029068|Ccnl2|chr4|+|A3SS|155818538|155820428|155820328|155820428|155817922|155817987|POS
ENSMUSG00000019841|Rev3l|chr10|+|SE|39742690|39742818|39732126|39732613|39783142|39783332	0.121	ENSMUSG00000019841|Rev3l|chr10|+|SE|39742690|39742818|39732126|39732613|39783142|39783332|POS
ENSMUSG00000034354|Mtmr3|chr11|-|SE|4485878|4485989|4485362|4485451|4487233|4488632	0.122	ENSMUSG00000034354|Mtmr3|chr11|-|SE|4485878|4485989|4485362|4485451|4487233|4488632|POS
ENSMUSG00000025375|Aatk|chr11|-|RI|120007312|120009475|120007312|120008444|120009274|120009475	0.122	ENSMUSG00000025375|Aatk|chr11|-|RI|120007312|120009475|120007312|120008444|120009274|120009475|POS
ENSMUSG00000056211|R3hdm1|chr1|+|RI|128181985|128184654|128181985|128182212|128184399|128184654	0.123	ENSMUSG00000056211|R3hdm1|chr1|+|RI|128181985|128184654|128181985|128182212|128184399|128184654|POS
ENSMUSG00000022983|Scaf4|chr16|-|RI|90242526|90242958|90242526|90242718|90242871|90242958	0.123	ENSMUSG00000022983|Scaf4|chr16|-|RI|90242526|90242958|90242526|90242718|90242871|90242958|POS
ENSMUSG00000031939|Taf1d|chr9|+|RI|15306872|15307821|15306872|15306990|15307727|15307821	0.124	ENSMUSG00000031939|Taf1d|chr9|+|RI|15306872|15307821|15306872|15306990|15307727|15307821|POS
ENSMUSG00000010608|Rbm25|chr12|+|SE|83639127|83639191|83632256|83632417|83642401|83642519	0.124	ENSMUSG00000010608|Rbm25|chr12|+|SE|83639127|83639191|83632256|83632417|83642401|83642519|POS
ENSMUSG00000038535|Zfp280d|chr9|+|SE|72318723|72318841|72312650|72312760|72319091|72319315	0.125	ENSMUSG00000038535|Zfp280d|chr9|+|SE|72318723|72318841|72312650|72312760|72319091|72319315|POS
ENSMUSG00000026456|Cyb5r1|chr1|+|A3SS|134407816|134408487|134408403|134408487|134407573|134407703	0.125	ENSMUSG00000026456|Cyb5r1|chr1|+|A3SS|134407816|134408487|134408403|134408487|134407573|134407703|POS
ENSMUSG00000024174|Pot1b|chr17|-|SE|55708997|55709086|55706105|55706152|55710838|55710906	0.126	ENSMUSG00000024174|Pot1b|chr17|-|SE|55708997|55709086|55706105|55706152|55710838|55710906|POS
ENSMUSG00000002885|Adgre5|chr8|-|SE|83730110|83730257|83729381|83729525|83733413|83733566	0.126	ENSMUSG00000002885|Adgre5|chr8|-|SE|83730110|83730257|83729381|83729525|83733413|83733566|POS
ENSMUSG00000022387|Brd1|chr15|-|A3SS|88700772|88701270|88700772|88700877|88707033|88707294	0.127	ENSMUSG00000022387|Brd1|chr15|-|A3SS|88700772|88701270|88700772|88700877|88707033|88707294|POS
ENSMUSG00000029822|Osbpl3|chr6|-|SE|50346010|50346103|50344873|50345030|50346327|50346431	0.127	ENSMUSG00000029822|Osbpl3|chr6|-|SE|50346010|50346103|50344873|50345030|50346327|50346431|POS
ENSMUSG00000038346|Zfp384|chr6|+|RI|125024032|125024552|125024032|125024270|125024413|125024552	0.127	ENSMUSG00000038346|Zfp384|chr6|+|RI|125024032|125024552|125024032|125024270|125024413|125024552|POS
ENSMUSG00000058835|Abi1|chr2|-|SE|22953434|22953608|22946575|22946761|22957017|22957118	0.128	ENSMUSG00000058835|Abi1|chr2|-|SE|22953434|22953608|22946575|22946761|22957017|22957118|POS
ENSMUSG00000019854|Reps1|chr10|+|SE|18107667|18107748|18104153|18104275|18114398|18114486	0.128	ENSMUSG00000019854|Reps1|chr10|+|SE|18107667|18107748|18104153|18104275|18114398|18114486|POS
ENSMUSG00000014418|Hps5|chr7|-|RI|46774813|46775951|46774813|46774937|46775764|46775951	0.128	ENSMUSG00000014418|Hps5|chr7|-|RI|46774813|46775951|46774813|46774937|46775764|46775951|POS
ENSMUSG00000019214|Chtf18|chr17|-|RI|25722843|25723313|25722843|25722942|25723219|25723313	0.128	ENSMUSG00000019214|Chtf18|chr17|-|RI|25722843|25723313|25722843|25722942|25723219|25723313|POS
ENSMUSG00000023971|Rrp36|chr17|-|SE|46672335|46672440|46670110|46670185|46672524|46672591	0.129	ENSMUSG00000023971|Rrp36|chr17|-|SE|46672335|46672440|46670110|46670185|46672524|46672591|POS
ENSMUSG00000034252|Senp6|chr9|+|SE|80098885|80098906|80093536|80093641|80103693|80103764	0.129	ENSMUSG00000034252|Senp6|chr9|+|SE|80098885|80098906|80093536|80093641|80103693|80103764|POS
ENSMUSG00000005078|Jkamp|chr12|+|A3SS|72089314|72089406|72089332|72089406|72085856|72086183	0.129	ENSMUSG00000005078|Jkamp|chr12|+|A3SS|72089314|72089406|72089332|72089406|72085856|72086183|POS
ENSMUSG00000024969|Mark2|chr19|-|SE|7279110|7279278|7278041|7278086|7279985|7280012	0.129	ENSMUSG00000024969|Mark2|chr19|-|SE|7279110|7279278|7278041|7278086|7279985|7280012|POS
ENSMUSG00000014850|Msh3|chr13|-|RI|92342245|92345101|92342245|92342412|92344955|92345101	0.13	ENSMUSG00000014850|Msh3|chr13|-|RI|92342245|92345101|92342245|92342412|92344955|92345101|POS
ENSMUSG00000049550|Clip1|chr5|-|SE|123635173|123635278|123630224|123631169|123640493|123640554	0.132	ENSMUSG00000049550|Clip1|chr5|-|SE|123635173|123635278|123630224|123631169|123640493|123640554|POS
ENSMUSG00000025473|Adam8|chr7|-|RI|139987178|139987737|139987178|139987268|139987559|139987737	0.132	ENSMUSG00000025473|Adam8|chr7|-|RI|139987178|139987737|139987178|139987268|139987559|139987737|POS
ENSMUSG00000033475|Tomm6|chr17|-|RI|47686739|47687288|47686739|47687062|47687187|47687288	0.132	ENSMUSG00000033475|Tomm6|chr17|-|RI|47686739|47687288|47686739|47687062|47687187|47687288|POS
ENSMUSG00000021870|Slmap|chr14|-|SE|26416202|26416292|26413167|26414988|26418112|26418247	0.133	ENSMUSG00000021870|Slmap|chr14|-|SE|26416202|26416292|26413167|26414988|26418112|26418247|POS
ENSMUSG00000060601|Nr1h2|chr7|-|RI|44551954|44552620|44551954|44552245|44552506|44552620	0.134	ENSMUSG00000060601|Nr1h2|chr7|-|RI|44551954|44552620|44551954|44552245|44552506|44552620|POS
ENSMUSG00000028106|Rprd2|chr3|-|SE|95786319|95786451|95785053|95785106|95787283|95787384	0.134	ENSMUSG00000028106|Rprd2|chr3|-|SE|95786319|95786451|95785053|95785106|95787283|95787384|POS
ENSMUSG00000032411|Tfdp2|chr9|+|SE|96247049|96247088|96232681|96232748|96273838|96273942	0.135	ENSMUSG00000032411|Tfdp2|chr9|+|SE|96247049|96247088|96232681|96232748|96273838|96273942|POS
ENSMUSG00000079557|Marchf2|chr17|-|SE|33715942|33716062|33709744|33709972|33718545|33718591	0.135	ENSMUSG00000079557|Marchf2|chr17|-|SE|33715942|33716062|33709744|33709972|33718545|33718591|POS
ENSMUSG00000026199|Ankzf1|chr1|+|A3SS|75195568|75195712|75195599|75195712|75195062|75195256	0.135	ENSMUSG00000026199|Ankzf1|chr1|+|A3SS|75195568|75195712|75195599|75195712|75195062|75195256|POS
ENSMUSG00000026082|Rev1|chr1|-|RI|38074314|38075023|38074314|38074443|38074898|38075023	0.135	ENSMUSG00000026082|Rev1|chr1|-|RI|38074314|38075023|38074314|38074443|38074898|38075023|POS
ENSMUSG00000043987|Cep164|chr9|-|SE|45826725|45826808|45823645|45823764|45828501|45828639	0.136	ENSMUSG00000043987|Cep164|chr9|-|SE|45826725|45826808|45823645|45823764|45828501|45828639|POS
ENSMUSG00000058835|Abi1|chr2|-|SE|22953434|22953611|22946575|22946761|22957017|22957118	0.136	ENSMUSG00000058835|Abi1|chr2|-|SE|22953434|22953611|22946575|22946761|22957017|22957118|POS
ENSMUSG00000002885|Adgre5|chr8|-|SE|83731902|83732037|83730110|83730257|83733413|83733566	0.137	ENSMUSG00000002885|Adgre5|chr8|-|SE|83731902|83732037|83730110|83730257|83733413|83733566|POS
ENSMUSG00000055897|Ppp4r1l-ps|chr2|-|A3SS|173615482|173616423|173615482|173615576|173659322|173659367	0.137	ENSMUSG00000055897|Ppp4r1l-ps|chr2|-|A3SS|173615482|173616423|173615482|173615576|173659322|173659367|POS
ENSMUSG00000022020|Naa16|chr14|-|SE|79350688|79350830|79344894|79345108|79351372|79351501	0.137	ENSMUSG00000022020|Naa16|chr14|-|SE|79350688|79350830|79344894|79345108|79351372|79351501|POS
ENSMUSG00000036473|Tbc1d24|chr17|-|A3SS|24185203|24186287|24185203|24186201|24189943|24190053	0.138	ENSMUSG00000036473|Tbc1d24|chr17|-|A3SS|24185203|24186287|24185203|24186201|24189943|24190053|POS
ENSMUSG00000047909|Ankrd16|chr2|+|SE|11785122|11785260|11784290|11784452|11786223|11786302	0.138	ENSMUSG00000047909|Ankrd16|chr2|+|SE|11785122|11785260|11784290|11784452|11786223|11786302|POS
ENSMUSG00000032803|Cdv3|chr9|-|A3SS|103353103|103356029|103353103|103355313|103356279|103356439	0.141	ENSMUSG00000032803|Cdv3|chr9|-|A3SS|103353103|103356029|103353103|103355313|103356279|103356439|POS
ENSMUSG00000032217|Rnf111|chr9|-|A3SS|70429551|70429679|70429551|70429655|70430930|70431026	0.141	ENSMUSG00000032217|Rnf111|chr9|-|A3SS|70429551|70429679|70429551|70429655|70430930|70431026|POS
ENSMUSG00000022999|Lmbr1l|chr15|-|RI|98908519|98908921|98908519|98908759|98908848|98908921	0.141	ENSMUSG00000022999|Lmbr1l|chr15|-|RI|98908519|98908921|98908519|98908759|98908848|98908921|POS
ENSMUSG00000021481|Zfp346|chr13|+|SE|55115479|55115624|55113677|55113770|55122329|55122515	0.141	ENSMUSG00000021481|Zfp346|chr13|+|SE|55115479|55115624|55113677|55113770|55122329|55122515|POS
ENSMUSG00000024613|Tcof1|chr18|-|SE|60827339|60827447|60822803|60822990|60828364|60828559	0.144	ENSMUSG00000024613|Tcof1|chr18|-|SE|60827339|60827447|60822803|60822990|60828364|60828559|POS
ENSMUSG00000022246|Rai14|chr15|-|SE|10589258|10589345|10587837|10587924|10591586|10591615	0.144	ENSMUSG00000022246|Rai14|chr15|-|SE|10589258|10589345|10587837|10587924|10591586|10591615|POS
ENSMUSG00000043065|Spice1|chr16|+|RI|44369879|44370378|44369879|44370019|44370237|44370378	0.144	ENSMUSG00000043065|Spice1|chr16|+|RI|44369879|44370378|44369879|44370019|44370237|44370378|POS
ENSMUSG00000028797|Tmem234|chr4|+|SE|129601869|129601961|129600982|129601134|129602194|129602261	0.144	ENSMUSG00000028797|Tmem234|chr4|+|SE|129601869|129601961|129600982|129601134|129602194|129602261|POS
ENSMUSG00000046111|Cep295|chr9|-|RI|15317458|15317767|15317458|15317593|15317673|15317767	0.145	ENSMUSG00000046111|Cep295|chr9|-|RI|15317458|15317767|15317458|15317593|15317673|15317767|POS
ENSMUSG00000047921|Trappc9|chr15|-|SE|73042176|73042203|73031521|73031643|73050594|73050723	0.146	ENSMUSG00000047921|Trappc9|chr15|-|SE|73042176|73042203|73031521|73031643|73050594|73050723|POS
ENSMUSG00000059439|Bcas3|chr11|+|SE|85822021|85822112|85801820|85801952|85825201|85825390	0.146	ENSMUSG00000059439|Bcas3|chr11|+|SE|85822021|85822112|85801820|85801952|85825201|85825390|POS
ENSMUSG00000046032|Snx12|chrX|-|RI|101211958|101213864|101211958|101212346|101213773|101213864	0.146	ENSMUSG00000046032|Snx12|chrX|-|RI|101211958|101213864|101211958|101212346|101213773|101213864|POS
ENSMUSG00000037112|Sik2|chr9|-|RI|50892800|50895961|50892800|50894081|50895343|50895961	0.147	ENSMUSG00000037112|Sik2|chr9|-|RI|50892800|50895961|50892800|50894081|50895343|50895961|POS
ENSMUSG00000037270|4932438A13Rik|chr3|+|SE|37022969|37023032|37022383|37022474|37026089|37026343	0.147	ENSMUSG00000037270|4932438A13Rik|chr3|+|SE|37022969|37023032|37022383|37022474|37026089|37026343|POS
ENSMUSG00000042323|Pbrm1|chr14|+|SE|31056235|31056280|31054157|31054255|31061468|31061745	0.149	ENSMUSG00000042323|Pbrm1|chr14|+|SE|31056235|31056280|31054157|31054255|31061468|31061745|POS
ENSMUSG00000040751|Lat2|chr5|-|SE|134606045|134606081|134605931|134605962|134606360|134606392	0.15	ENSMUSG00000040751|Lat2|chr5|-|SE|134606045|134606081|134605931|134605962|134606360|134606392|POS
ENSMUSG00000046567|4930430F08Rik|chr10|-|SE|100582262|100582322|100577445|100578431|100583913|100584009	0.15	ENSMUSG00000046567|4930430F08Rik|chr10|-|SE|100582262|100582322|100577445|100578431|100583913|100584009|POS
ENSMUSG00000042594|Sh2b3|chr5|-|SE|121832502|121832590|121828401|121829076|121836549|121836859	0.151	ENSMUSG00000042594|Sh2b3|chr5|-|SE|121832502|121832590|121828401|121829076|121836549|121836859|POS
ENSMUSG00000032913|Lrig2|chr3|-|A3SS|104462658|104462808|104462658|104462787|104463858|104464308	0.152	ENSMUSG00000032913|Lrig2|chr3|-|A3SS|104462658|104462808|104462658|104462787|104463858|104464308|POS
ENSMUSG00000026150|Mff|chr1|+|MXE|82741817|82741976|82745523|82745556|82735418|82735507|82747082|82747142	0.154	ENSMUSG00000026150|Mff|chr1|+|MXE|82741817|82741976|82745523|82745556|82735418|82735507|82747082|82747142|POS
ENSMUSG00000029767|Calu|chr6|+|SE|29361293|29361487|29356470|29356697|29361559|29361753	0.156	ENSMUSG00000029767|Calu|chr6|+|SE|29361293|29361487|29356470|29356697|29361559|29361753|POS
ENSMUSG00000029767|Calu|chr6|+|MXE|29361293|29361487|29361559|29361753|29356470|29356697|29366039|29366206	0.158	ENSMUSG00000029767|Calu|chr6|+|MXE|29361293|29361487|29361559|29361753|29356470|29356697|29366039|29366206|POS
ENSMUSG00000020107|Anapc16|chr10|-|SE|60002417|60002467|59996447|59996614|60002955|60002995	0.158	ENSMUSG00000020107|Anapc16|chr10|-|SE|60002417|60002467|59996447|59996614|60002955|60002995|POS
ENSMUSG00000053460|Ggcx|chr6|+|SE|72427897|72428049|72427041|72427173|72428457|72428627	0.158	ENSMUSG00000053460|Ggcx|chr6|+|SE|72427897|72428049|72427041|72427173|72428457|72428627|POS
ENSMUSG00000026098|Pms1|chr1|-|SE|53290378|53290423|53281940|53282092|53296885|53297017	0.158	ENSMUSG00000026098|Pms1|chr1|-|SE|53290378|53290423|53281940|53282092|53296885|53297017|POS
ENSMUSG00000028284|Map3k7|chr4|+|SE|31994873|31995010|31992472|31992516|32002088|32002153	0.159	ENSMUSG00000028284|Map3k7|chr4|+|SE|31994873|31995010|31992472|31992516|32002088|32002153|POS
ENSMUSG00000039361|Picalm|chr7|+|A3SS|90191140|90191272|90191155|90191272|90189149|90189257	0.159	ENSMUSG00000039361|Picalm|chr7|+|A3SS|90191140|90191272|90191155|90191272|90189149|90189257|POS
ENSMUSG00000047909|Ankrd16|chr2|+|SE|11785169|11785260|11784292|11784452|11786223|11786302	0.16	ENSMUSG00000047909|Ankrd16|chr2|+|SE|11785169|11785260|11784292|11784452|11786223|11786302|POS
ENSMUSG00000022553|Maf1|chr15|+|SE|76351995|76352041|76351293|76351659|76352419|76352552	0.161	ENSMUSG00000022553|Maf1|chr15|+|SE|76351995|76352041|76351293|76351659|76352419|76352552|POS
ENSMUSG00000022833|Ccdc14|chr16|+|RI|34705160|34706897|34705160|34705255|34706386|34706897	0.161	ENSMUSG00000022833|Ccdc14|chr16|+|RI|34705160|34706897|34705160|34705255|34706386|34706897|POS
ENSMUSG00000112148|Lilrb4a|chr10|+|RI|51491433|51492163|51491433|51491718|51491860|51492163	0.161	ENSMUSG00000112148|Lilrb4a|chr10|+|RI|51491433|51492163|51491433|51491718|51491860|51492163|POS
ENSMUSG00000019854|Reps1|chr10|+|SE|18107670|18107748|18104153|18104275|18114398|18114486	0.163	ENSMUSG00000019854|Reps1|chr10|+|SE|18107670|18107748|18104153|18104275|18114398|18114486|POS
ENSMUSG00000033540|Idua|chr5|+|RI|108680110|108680497|108680110|108680206|108680294|108680497	0.164	ENSMUSG00000033540|Idua|chr5|+|RI|108680110|108680497|108680110|108680206|108680294|108680497|POS
ENSMUSG00000029175|Slc35f6|chr5|+|RI|30655494|30656100|30655494|30655666|30655887|30656100	0.166	ENSMUSG00000029175|Slc35f6|chr5|+|RI|30655494|30656100|30655494|30655666|30655887|30656100|POS
ENSMUSG00000039531|Zup1|chr10|-|A3SS|33940157|33940383|33940157|33940279|33943649|33943760	0.169	ENSMUSG00000039531|Zup1|chr10|-|A3SS|33940157|33940383|33940157|33940279|33943649|33943760|POS
ENSMUSG00000040462|Os9|chr10|-|SE|127096914|127097079|127096629|127096742|127097931|127098121	0.17	ENSMUSG00000040462|Os9|chr10|-|SE|127096914|127097079|127096629|127096742|127097931|127098121|POS
ENSMUSG00000029810|Tmem176b|chr6|-|SE|48840360|48840453|48838171|48838365|48840995|48841078	0.17	ENSMUSG00000029810|Tmem176b|chr6|-|SE|48840360|48840453|48838171|48838365|48840995|48841078|POS
ENSMUSG00000038346|Zfp384|chr6|+|SE|125026256|125026319|125025847|125025940|125030797|125032783	0.17	ENSMUSG00000038346|Zfp384|chr6|+|SE|125026256|125026319|125025847|125025940|125030797|125032783|POS
ENSMUSG00000034610|Tut4|chr4|+|A3SS|108549225|108549413|108549240|108549413|108548054|108548170	0.173	ENSMUSG00000034610|Tut4|chr4|+|A3SS|108549225|108549413|108549240|108549413|108548054|108548170|POS
ENSMUSG00000029328|Hnrnpdl|chr5|-|SE|100035634|100035739|100034726|100034984|100036103|100036195	0.174	ENSMUSG00000029328|Hnrnpdl|chr5|-|SE|100035634|100035739|100034726|100034984|100036103|100036195|POS
ENSMUSG00000045098|Kmt5b|chr19|+|SE|3782219|3782279|3768021|3768340|3786388|3786627	0.174	ENSMUSG00000045098|Kmt5b|chr19|+|SE|3782219|3782279|3768021|3768340|3786388|3786627|POS
ENSMUSG00000058818|Pirb|chr7|-|RI|3716593|3717426|3716593|3716890|3717117|3717426	0.174	ENSMUSG00000058818|Pirb|chr7|-|RI|3716593|3717426|3716593|3716890|3717117|3717426|POS
ENSMUSG00000015755|Tab2|chr10|-|SE|7933067|7933208|7924684|7924872|7955800|7955893	0.175	ENSMUSG00000015755|Tab2|chr10|-|SE|7933067|7933208|7924684|7924872|7955800|7955893|POS
ENSMUSG00000000605|Clcn4|chr7|-|RI|7290398|7291956|7290398|7290585|7291410|7291956	0.175	ENSMUSG00000000605|Clcn4|chr7|-|RI|7290398|7291956|7290398|7290585|7291410|7291956|POS
ENSMUSG00000055692|Tmem191c|chr16|+|RI|17276633|17277039|17276633|17276887|17276961|17277039	0.178	ENSMUSG00000055692|Tmem191c|chr16|+|RI|17276633|17277039|17276633|17276887|17276961|17277039|POS
ENSMUSG00000074733|Zfp950|chr19|-|SE|61118226|61118350|61114983|61117288|61127006|61127067	0.179	ENSMUSG00000074733|Zfp950|chr19|-|SE|61118226|61118350|61114983|61117288|61127006|61127067|POS
ENSMUSG00000019907|Ppp1r12a|chr10|+|SE|108253324|108253495|108252756|108252924|108259755|108259846	0.18	ENSMUSG00000019907|Ppp1r12a|chr10|+|SE|108253324|108253495|108252756|108252924|108259755|108259846|POS
ENSMUSG00000034570|Inpp5j|chr11|-|RI|3501045|3501428|3501045|3501162|3501319|3501428	0.18	ENSMUSG00000034570|Inpp5j|chr11|-|RI|3501045|3501428|3501045|3501162|3501319|3501428|POS
ENSMUSG00000025958|Creb1|chr1|+|MXE|64559726|64559768|64561752|64561865|64558502|64558649|64566216|64566317	0.183	ENSMUSG00000025958|Creb1|chr1|+|MXE|64559726|64559768|64561752|64561865|64558502|64558649|64566216|64566317|POS
ENSMUSG00000042272|Sestd1|chr2|-|RI|77198288|77199060|77198288|77198403|77198865|77199060	0.186	ENSMUSG00000042272|Sestd1|chr2|-|RI|77198288|77199060|77198288|77198403|77198865|77199060|POS
ENSMUSG00000028284|Map3k7|chr4|+|SE|31994873|31994954|31992386|31992516|32002088|32002153	0.187	ENSMUSG00000028284|Map3k7|chr4|+|SE|31994873|31994954|31992386|31992516|32002088|32002153|POS
ENSMUSG00000008206|Cers4|chr8|+|RI|4519462|4520308|4519462|4519513|4520215|4520308	0.188	ENSMUSG00000008206|Cers4|chr8|+|RI|4519462|4520308|4519462|4519513|4520215|4520308|POS
ENSMUSG00000024118|Tedc2|chr17|-|RI|24219730|24220310|24219730|24220133|24220251|24220310	0.189	ENSMUSG00000024118|Tedc2|chr17|-|RI|24219730|24220310|24219730|24220133|24220251|24220310|POS
ENSMUSG00000079084|Ccdc82|chr9|+|SE|13249258|13249342|13246978|13247021|13252070|13252798	0.189	ENSMUSG00000079084|Ccdc82|chr9|+|SE|13249258|13249342|13246978|13247021|13252070|13252798|POS
ENSMUSG00000051278|Zgrf1|chr3|+|A3SS|127594459|127596022|127595878|127596022|127589968|127590108	0.189	ENSMUSG00000051278|Zgrf1|chr3|+|A3SS|127594459|127596022|127595878|127596022|127589968|127590108|POS
ENSMUSG00000033287|Kctd17|chr15|+|SE|78436900|78437099|78435584|78435710|78438486|78438647	0.189	ENSMUSG00000033287|Kctd17|chr15|+|SE|78436900|78437099|78435584|78435710|78438486|78438647|POS
ENSMUSG00000042790|Rnf214|chr9|-|RI|45866565|45867632|45866565|45866661|45867499|45867632	0.19	ENSMUSG00000042790|Rnf214|chr9|-|RI|45866565|45867632|45866565|45866661|45867499|45867632|POS
ENSMUSG00000037536|Fbxo34|chr14|+|SE|47526204|47526314|47500793|47500870|47529174|47529270	0.192	ENSMUSG00000037536|Fbxo34|chr14|+|SE|47526204|47526314|47500793|47500870|47529174|47529270|POS
ENSMUSG00000039958|Etfbkmt|chr6|+|A3SS|149144014|149144442|149144033|149144442|149141512|149141704	0.192	ENSMUSG00000039958|Etfbkmt|chr6|+|A3SS|149144014|149144442|149144033|149144442|149141512|149141704|POS
ENSMUSG00000005583|Mef2c|chr13|+|A3SS|83662306|83662631|83662402|83662631|83656216|83656352	0.194	ENSMUSG00000005583|Mef2c|chr13|+|A3SS|83662306|83662631|83662402|83662631|83656216|83656352|POS
ENSMUSG00000025437|Usp33|chr3|+|A3SS|152374890|152374985|152374914|152374985|152374619|152374789	0.195	ENSMUSG00000025437|Usp33|chr3|+|A3SS|152374890|152374985|152374914|152374985|152374619|152374789|POS
ENSMUSG00000073434|Wdr90|chr17|-|A5SS|25860654|25860817|25860708|25860817|25860371|25860542	0.196	ENSMUSG00000073434|Wdr90|chr17|-|A5SS|25860654|25860817|25860708|25860817|25860371|25860542|POS
ENSMUSG00000021115|Vrk1|chr12|+|RI|106070524|106071641|106070524|106070615|106071569|106071641	0.197	ENSMUSG00000021115|Vrk1|chr12|+|RI|106070524|106071641|106070524|106070615|106071569|106071641|POS
ENSMUSG00000044876|Zfp444|chr7|+|SE|6173981|6174101|6172512|6172574|6183861|6183951	0.199	ENSMUSG00000044876|Zfp444|chr7|+|SE|6173981|6174101|6172512|6172574|6183861|6183951|POS
ENSMUSG00000031570|Plpp5|chr8|+|RI|25721661|25722600|25721661|25721786|25722429|25722600	0.199	ENSMUSG00000031570|Plpp5|chr8|+|RI|25721661|25722600|25721661|25721786|25722429|25722600|POS
ENSMUSG00000041258|Zfp236|chr18|-|SE|82610604|82610686|82609287|82609475|82617709|82617750	0.199	ENSMUSG00000041258|Zfp236|chr18|-|SE|82610604|82610686|82609287|82609475|82617709|82617750|POS
ENSMUSG00000035325|Sec31a|chr5|-|SE|100389067|100389106|100386127|100386203|100390758|100390833	0.202	ENSMUSG00000035325|Sec31a|chr5|-|SE|100389067|100389106|100386127|100386203|100390758|100390833|POS
ENSMUSG00000010608|Rbm25|chr12|+|SE|83639127|83639375|83632305|83632417|83642401|83642519	0.202	ENSMUSG00000010608|Rbm25|chr12|+|SE|83639127|83639375|83632305|83632417|83642401|83642519|POS
ENSMUSG00000056268|Dennd1b|chr1|+|SE|139059066|139059126|139054540|139054621|139060274|139060328	0.203	ENSMUSG00000056268|Dennd1b|chr1|+|SE|139059066|139059126|139054540|139054621|139060274|139060328|POS
ENSMUSG00000030733|Sh2b1|chr7|-|SE|126469487|126469570|126469124|126469328|126471121|126471297	0.203	ENSMUSG00000030733|Sh2b1|chr7|-|SE|126469487|126469570|126469124|126469328|126471121|126471297|POS
ENSMUSG00000046897|Zfp740|chr15|+|SE|102205228|102205305|102204570|102204883|102207770|102207920	0.205	ENSMUSG00000046897|Zfp740|chr15|+|SE|102205228|102205305|102204570|102204883|102207770|102207920|POS
ENSMUSG00000072653|Zfp783|chr6|+|A3SS|47945836|47945962|47945882|47945962|47945428|47945751	0.206	ENSMUSG00000072653|Zfp783|chr6|+|A3SS|47945836|47945962|47945882|47945962|47945428|47945751|POS
ENSMUSG00000042766|Trim46|chr3|-|SE|89236302|89236600|89234176|89235292|89237616|89237919	0.207	ENSMUSG00000042766|Trim46|chr3|-|SE|89236302|89236600|89234176|89235292|89237616|89237919|POS
ENSMUSG00000020166|Cnot2|chr10|-|SE|116537220|116537278|116527826|116527949|116549032|116549175	0.212	ENSMUSG00000020166|Cnot2|chr10|-|SE|116537220|116537278|116527826|116527949|116549032|116549175|POS
ENSMUSG00000030990|Pgap2|chr7|+|SE|102222781|102222801|102210371|102210591|102223378|102223483	0.213	ENSMUSG00000030990|Pgap2|chr7|+|SE|102222781|102222801|102210371|102210591|102223378|102223483|POS
ENSMUSG00000025949|Pikfyve|chr1|+|SE|65224161|65224329|65223504|65223652|65230793|65230853	0.215	ENSMUSG00000025949|Pikfyve|chr1|+|SE|65224161|65224329|65223504|65223652|65230793|65230853|POS
ENSMUSG00000073434|Wdr90|chr17|-|RI|25860371|25860817|25860371|25860542|25860708|25860817	0.215	ENSMUSG00000073434|Wdr90|chr17|-|RI|25860371|25860817|25860371|25860542|25860708|25860817|POS
ENSMUSG00000068015|Lrch1|chr14|-|SE|74794910|74794991|74786280|74786390|74795296|74795369	0.219	ENSMUSG00000068015|Lrch1|chr14|-|SE|74794910|74794991|74786280|74786390|74795296|74795369|POS
ENSMUSG00000007837|Prrg2|chr7|-|A3SS|45060204|45060415|45060204|45060386|45060740|45060892	0.22	ENSMUSG00000007837|Prrg2|chr7|-|A3SS|45060204|45060415|45060204|45060386|45060740|45060892|POS
ENSMUSG00000028559|Osbpl9|chr4|-|SE|109091660|109091699|109087394|109087485|109098502|109098553	0.222	ENSMUSG00000028559|Osbpl9|chr4|-|SE|109091660|109091699|109087394|109087485|109098502|109098553|POS
ENSMUSG00000020166|Cnot2|chr10|-|SE|116537220|116537448|116527826|116527949|116549032|116549105	0.228	ENSMUSG00000020166|Cnot2|chr10|-|SE|116537220|116537448|116527826|116527949|116549032|116549105|POS
ENSMUSG00000032067|Pts|chr9|-|SE|50528145|50528232|50526869|50526949|50528556|50528640	0.229	ENSMUSG00000032067|Pts|chr9|-|SE|50528145|50528232|50526869|50526949|50528556|50528640|POS
ENSMUSG00000047766|Lrrc49|chr9|-|SE|60680504|60680702|60680068|60680171|60685034|60685122	0.238	ENSMUSG00000047766|Lrrc49|chr9|-|SE|60680504|60680702|60680068|60680171|60685034|60685122|POS
ENSMUSG00000029208|Guf1|chr5|+|RI|69567127|69568497|69567127|69567261|69568395|69568497	0.247	ENSMUSG00000029208|Guf1|chr5|+|RI|69567127|69568497|69567127|69567261|69568395|69568497|POS
ENSMUSG00000042210|Abhd14a|chr9|-|A3SS|106440620|106440910|106440620|106440856|106443826|106443942	0.253	ENSMUSG00000042210|Abhd14a|chr9|-|A3SS|106440620|106440910|106440620|106440856|106443826|106443942|POS
ENSMUSG00000032913|Lrig2|chr3|-|A3SS|104462658|104462845|104462658|104462787|104463858|104464308	0.255	ENSMUSG00000032913|Lrig2|chr3|-|A3SS|104462658|104462845|104462658|104462787|104463858|104464308|POS
ENSMUSG00000038690|Atp5j2|chr5|-|A3SS|145188192|145188322|145188192|145188258|145191502|145191592	0.276	ENSMUSG00000038690|Atp5j2|chr5|-|A3SS|145188192|145188322|145188192|145188258|145191502|145191592|POS
ENSMUSG00000042790|Rnf214|chr9|-|SE|45866946|45867051|45866565|45866661|45867499|45867632	0.284	ENSMUSG00000042790|Rnf214|chr9|-|SE|45866946|45867051|45866565|45866661|45867499|45867632|POS
ENSMUSG00000029422|Rsrc2|chr5|-|SE|123746771|123746870|123745496|123745589|123749288|123749367	0.294	ENSMUSG00000029422|Rsrc2|chr5|-|SE|123746771|123746870|123745496|123745589|123749288|123749367|POS
ENSMUSG00000017210|Med24|chr11|-|SE|98717708|98717765|98716413|98716525|98717909|98718142	0.295	ENSMUSG00000017210|Med24|chr11|-|SE|98717708|98717765|98716413|98716525|98717909|98718142|POS
ENSMUSG00000049916|2610318N02Rik|chr16|-|SE|17123511|17123654|17121225|17121551|17124989|17125106	0.295	ENSMUSG00000049916|2610318N02Rik|chr16|-|SE|17123511|17123654|17121225|17121551|17124989|17125106|POS
ENSMUSG00000021843|Ktn1|chr14|+|SE|47704419|47704488|47704186|47704277|47705762|47705800	0.299	ENSMUSG00000021843|Ktn1|chr14|+|SE|47704419|47704488|47704186|47704277|47705762|47705800|POS
ENSMUSG00000033961|Zfp446|chr7|+|RI|12981845|12983396|12981845|12981927|12982118|12983396	0.313	ENSMUSG00000033961|Zfp446|chr7|+|RI|12981845|12983396|12981845|12981927|12982118|12983396|POS
ENSMUSG00000032827|Ppp1r9a|chr6|+|RI|5134016|5134932|5134016|5134174|5134688|5134932	0.332	ENSMUSG00000032827|Ppp1r9a|chr6|+|RI|5134016|5134932|5134016|5134174|5134688|5134932|POS
ENSMUSG00000014786|Slc9a5|chr8|+|RI|105356530|105357173|105356530|105356751|105356970|105357173	0.334	ENSMUSG00000014786|Slc9a5|chr8|+|RI|105356530|105357173|105356530|105356751|105356970|105357173|POS
ENSMUSG00000037536|Fbxo34|chr14|+|SE|47504985|47505132|47500793|47500870|47529174|47529305	0.358	ENSMUSG00000037536|Fbxo34|chr14|+|SE|47504985|47505132|47500793|47500870|47529174|47529305|POS
ENSMUSG00000029823|Luc7l2|chr6|+|SE|38568846|38568917|38554979|38555063|38570509|38570604	0.375	ENSMUSG00000029823|Luc7l2|chr6|+|SE|38568846|38568917|38554979|38555063|38570509|38570604|POS
ENSMUSG00000042097|Zfp239|chr6|+|SE|117869217|117869273|117863076|117863142|117870255|117870467	0.394	ENSMUSG00000042097|Zfp239|chr6|+|SE|117869217|117869273|117863076|117863142|117870255|117870467|POS
ENSMUSG00000028716|Pdzk1ip1|chr4|+|RI|115088722|115089212|115088722|115088806|115089038|115089212	0.521	ENSMUSG00000028716|Pdzk1ip1|chr4|+|RI|115088722|115089212|115088722|115088806|115089038|115089212|POS

## Sheet: KL_Q157R_DSE
Event_ID	delta_PSI	Event_ID_withdir
ENSMUSG00000091803|Cox16|chr12|-|A3SS|81472092|81472351|81472092|81472171|81474586|81474649	-0.465	ENSMUSG00000091803|Cox16|chr12|-|A3SS|81472092|81472351|81472092|81472171|81474586|81474649|NEG
ENSMUSG00000014873|Surf2|chr2|+|A3SS|26918864|26919055|26918928|26919055|26917427|26917531	-0.446	ENSMUSG00000014873|Surf2|chr2|+|A3SS|26918864|26919055|26918928|26919055|26917427|26917531|NEG
ENSMUSG00000014873|Surf2|chr2|+|A3SS|26918872|26919055|26918928|26919055|26917427|26917531	-0.406	ENSMUSG00000014873|Surf2|chr2|+|A3SS|26918872|26919055|26918928|26919055|26917427|26917531|NEG
ENSMUSG00000051166|Eml5|chr12|-|A3SS|98798790|98798948|98798790|98798929|98800902|98801111	-0.363	ENSMUSG00000051166|Eml5|chr12|-|A3SS|98798790|98798948|98798790|98798929|98800902|98801111|NEG
ENSMUSG00000014873|Surf2|chr2|+|RI|26917427|26919055|26917427|26917531|26918928|26919055	-0.333	ENSMUSG00000014873|Surf2|chr2|+|RI|26917427|26919055|26917427|26917531|26918928|26919055|NEG
ENSMUSG00000020782|Llgl2|chr11|+|RI|115854546|115855105|115854546|115854575|115855062|115855105	-0.31	ENSMUSG00000020782|Llgl2|chr11|+|RI|115854546|115855105|115854546|115854575|115855062|115855105|NEG
ENSMUSG00000020782|Llgl2|chr11|+|SE|115854811|115854859|115854546|115854575|115855062|115855105	-0.282	ENSMUSG00000020782|Llgl2|chr11|+|SE|115854811|115854859|115854546|115854575|115855062|115855105|NEG
ENSMUSG00000072653|Zfp783|chr6|+|SE|47946661|47946790|47945836|47945962|47948893|47948985	-0.263	ENSMUSG00000072653|Zfp783|chr6|+|SE|47946661|47946790|47945836|47945962|47948893|47948985|NEG
ENSMUSG00000016494|Cd34|chr1|+|A3SS|194959779|194961279|194959935|194961279|194959065|194959230	-0.244	ENSMUSG00000016494|Cd34|chr1|+|A3SS|194959779|194961279|194959935|194961279|194959065|194959230|NEG
ENSMUSG00000038126|Mphosph9|chr5|-|A3SS|124320844|124320998|124320844|124320954|124324873|124325137	-0.241	ENSMUSG00000038126|Mphosph9|chr5|-|A3SS|124320844|124320998|124320844|124320954|124324873|124325137|NEG
ENSMUSG00000097277|2900076A07Rik|chr7|+|SE|81529156|81529258|81528791|81528940|81529346|81529527	-0.24	ENSMUSG00000097277|2900076A07Rik|chr7|+|SE|81529156|81529258|81528791|81528940|81529346|81529527|NEG
ENSMUSG00000053333|Dis3l2|chr1|+|MXE|86791415|86791457|86812511|86812589|86760287|86760389|86821221|86821450	-0.237	ENSMUSG00000053333|Dis3l2|chr1|+|MXE|86791415|86791457|86812511|86812589|86760287|86760389|86821221|86821450|NEG
ENSMUSG00000006154|Eps8l1|chr7|+|SE|4462285|4462400|4460673|4461024|4465358|4465412	-0.234	ENSMUSG00000006154|Eps8l1|chr7|+|SE|4462285|4462400|4460673|4461024|4465358|4465412|NEG
ENSMUSG00000020166|Cnot2|chr10|-|SE|116549032|116549105|116527826|116527949|116581452|116581483	-0.226	ENSMUSG00000020166|Cnot2|chr10|-|SE|116549032|116549105|116527826|116527949|116581452|116581483|NEG
ENSMUSG00000035401|Emsy|chr7|-|SE|98645166|98645208|98641492|98641668|98646448|98646523	-0.22	ENSMUSG00000035401|Emsy|chr7|-|SE|98645166|98645208|98641492|98641668|98646448|98646523|NEG
ENSMUSG00000024871|Doc2g|chr19|+|A3SS|4006060|4006267|4006109|4006267|4004762|4004816	-0.213	ENSMUSG00000024871|Doc2g|chr19|+|A3SS|4006060|4006267|4006109|4006267|4004762|4004816|NEG
ENSMUSG00000030177|Ccdc77|chr6|-|A3SS|120350206|120350444|120350206|120350390|120354000|120354054	-0.21	ENSMUSG00000030177|Ccdc77|chr6|-|A3SS|120350206|120350444|120350206|120350390|120354000|120354054|NEG
ENSMUSG00000031389|Arhgap4|chrX|-|SE|73906156|73906219|73905650|73905863|73906428|73906591	-0.207	ENSMUSG00000031389|Arhgap4|chrX|-|SE|73906156|73906219|73905650|73905863|73906428|73906591|NEG
ENSMUSG00000035401|Emsy|chr7|-|SE|98602582|98602747|98597045|98597184|98610666|98610865	-0.207	ENSMUSG00000035401|Emsy|chr7|-|SE|98602582|98602747|98597045|98597184|98610666|98610865|NEG
ENSMUSG00000035824|Tk2|chr8|-|SE|104236771|104236845|104231159|104231248|104238743|104238833	-0.204	ENSMUSG00000035824|Tk2|chr8|-|SE|104236771|104236845|104231159|104231248|104238743|104238833|NEG
ENSMUSG00000013236|Ptprs|chr17|-|SE|56429098|56429157|56424879|56424977|56434452|56434597	-0.197	ENSMUSG00000013236|Ptprs|chr17|-|SE|56429098|56429157|56424879|56424977|56434452|56434597|NEG
ENSMUSG00000021417|Eci2|chr13|-|A3SS|34993067|34993328|34993067|34993220|34994013|34994132	-0.197	ENSMUSG00000021417|Eci2|chr13|-|A3SS|34993067|34993328|34993067|34993220|34994013|34994132|NEG
ENSMUSG00000056267|Cep70|chr9|+|SE|99263628|99263809|99262825|99262949|99275577|99275747	-0.196	ENSMUSG00000056267|Cep70|chr9|+|SE|99263628|99263809|99262825|99262949|99275577|99275747|NEG
ENSMUSG00000030556|Lrrc28|chr7|-|A3SS|67559857|67560064|67559857|67559969|67617992|67618130	-0.194	ENSMUSG00000030556|Lrrc28|chr7|-|A3SS|67559857|67560064|67559857|67559969|67617992|67618130|NEG
ENSMUSG00000060550|H2-Q7|chr17|+|SE|35442266|35442551|35439908|35440184|35442966|35442999	-0.191	ENSMUSG00000060550|H2-Q7|chr17|+|SE|35442266|35442551|35439908|35440184|35442966|35442999|NEG
ENSMUSG00000041707|Tmem273|chr14|+|SE|32806779|32806911|32805123|32805177|32808348|32808379	-0.19	ENSMUSG00000041707|Tmem273|chr14|+|SE|32806779|32806911|32805123|32805177|32808348|32808379|NEG
ENSMUSG00000025085|Ablim1|chr19|-|A3SS|57046924|57047071|57046924|57047065|57049461|57049509	-0.189	ENSMUSG00000025085|Ablim1|chr19|-|A3SS|57046924|57047071|57046924|57047065|57049461|57049509|NEG
ENSMUSG00000032407|U2surp|chr9|-|SE|95500687|95500873|95495834|95495933|95502539|95502584	-0.188	ENSMUSG00000032407|U2surp|chr9|-|SE|95500687|95500873|95495834|95495933|95502539|95502584|NEG
ENSMUSG00000029687|Ezh2|chr6|-|SE|47541844|47541970|47540676|47540855|47542365|47542406	-0.182	ENSMUSG00000029687|Ezh2|chr6|-|SE|47541844|47541970|47540676|47540855|47542365|47542406|NEG
ENSMUSG00000024843|Chka|chr19|+|SE|3875734|3875788|3864647|3864759|3884471|3884585	-0.173	ENSMUSG00000024843|Chka|chr19|+|SE|3875734|3875788|3864647|3864759|3884471|3884585|NEG
ENSMUSG00000022119|Rbm26|chr14|-|SE|105139090|105139162|105131881|105132007|105140315|105140438	-0.172	ENSMUSG00000022119|Rbm26|chr14|-|SE|105139090|105139162|105131881|105132007|105140315|105140438|NEG
ENSMUSG00000025137|Pcyt2|chr11|-|SE|120612845|120613083|120612204|120612601|120613378|120613423	-0.171	ENSMUSG00000025137|Pcyt2|chr11|-|SE|120612845|120613083|120612204|120612601|120613378|120613423|NEG
ENSMUSG00000037536|Fbxo34|chr14|+|SE|47504985|47505132|47472602|47472717|47529174|47529305	-0.168	ENSMUSG00000037536|Fbxo34|chr14|+|SE|47504985|47505132|47472602|47472717|47529174|47529305|NEG
ENSMUSG00000031093|Dock11|chrX|+|SE|36009942|36009981|36009338|36009450|36011631|36011810	-0.167	ENSMUSG00000031093|Dock11|chrX|+|SE|36009942|36009981|36009338|36009450|36011631|36011810|NEG
ENSMUSG00000035401|Emsy|chr7|-|SE|98602582|98602747|98600671|98600827|98610666|98610865	-0.165	ENSMUSG00000035401|Emsy|chr7|-|SE|98602582|98602747|98600671|98600827|98610666|98610865|NEG
ENSMUSG00000102976|Zc3h11a|chr1|-|SE|133655344|133655398|133653972|133654032|133661255|133661360	-0.161	ENSMUSG00000102976|Zc3h11a|chr1|-|SE|133655344|133655398|133653972|133654032|133661255|133661360|NEG
ENSMUSG00000046897|Zfp740|chr15|+|A3SS|102208235|102208361|102208271|102208361|102207770|102207920	-0.16	ENSMUSG00000046897|Zfp740|chr15|+|A3SS|102208235|102208361|102208271|102208361|102207770|102207920|NEG
ENSMUSG00000021027|Ralgapa1|chr12|-|SE|55612072|55612103|55602898|55604268|55612633|55612758	-0.159	ENSMUSG00000021027|Ralgapa1|chr12|-|SE|55612072|55612103|55602898|55604268|55612633|55612758|NEG
ENSMUSG00000033931|Rbm34|chr8|-|SE|126961911|126961971|126959541|126959585|126965381|126965622	-0.158	ENSMUSG00000033931|Rbm34|chr8|-|SE|126961911|126961971|126959541|126959585|126965381|126965622|NEG
ENSMUSG00000025145|Lrrc45|chr11|+|SE|120718649|120718720|120718441|120718553|120719039|120719132	-0.153	ENSMUSG00000025145|Lrrc45|chr11|+|SE|120718649|120718720|120718441|120718553|120719039|120719132|NEG
ENSMUSG00000028295|Smim8|chr4|-|SE|34771877|34772053|34770887|34771414|34778223|34778270	-0.152	ENSMUSG00000028295|Smim8|chr4|-|SE|34771877|34772053|34770887|34771414|34778223|34778270|NEG
ENSMUSG00000060950|Trmt61a|chr12|+|RI|111678104|111678962|111678104|111678161|111678602|111678962	-0.149	ENSMUSG00000060950|Trmt61a|chr12|+|RI|111678104|111678962|111678104|111678161|111678602|111678962|NEG
ENSMUSG00000025026|Add3|chr19|+|SE|53244309|53244405|53242503|53242627|53244997|53247399	-0.148	ENSMUSG00000025026|Add3|chr19|+|SE|53244309|53244405|53242503|53242627|53244997|53247399|NEG
ENSMUSG00000021982|Cdadc1|chr14|-|SE|59564517|59564595|59559387|59560921|59568947|59569008	-0.144	ENSMUSG00000021982|Cdadc1|chr14|-|SE|59564517|59564595|59559387|59560921|59568947|59569008|NEG
ENSMUSG00000029208|Guf1|chr5|+|SE|69563082|69563222|69561653|69561857|69564523|69564647	-0.142	ENSMUSG00000029208|Guf1|chr5|+|SE|69563082|69563222|69561653|69561857|69564523|69564647|NEG
ENSMUSG00000030279|C2cd5|chr6|-|SE|143020323|143020374|143017882|143018073|143029159|143029246	-0.141	ENSMUSG00000030279|C2cd5|chr6|-|SE|143020323|143020374|143017882|143018073|143029159|143029246|NEG
ENSMUSG00000023994|Nfya|chr17|-|A3SS|48392339|48392506|48392339|48392488|48393179|48393285	-0.14	ENSMUSG00000023994|Nfya|chr17|-|A3SS|48392339|48392506|48392339|48392488|48393179|48393285|NEG
ENSMUSG00000040363|Bcor|chrX|-|A3SS|12048302|12048647|12048302|12048545|12048994|12049252	-0.14	ENSMUSG00000040363|Bcor|chrX|-|A3SS|12048302|12048647|12048302|12048545|12048994|12049252|NEG
ENSMUSG00000086370|Ftx|chrX|-|A5SS|103613022|103613195|103613043|103613195|103609303|103609416	-0.138	ENSMUSG00000086370|Ftx|chrX|-|A5SS|103613022|103613195|103613043|103613195|103609303|103609416|NEG
ENSMUSG00000029478|Ncor2|chr5|-|A3SS|125037273|125037379|125037273|125037376|125037860|125037997	-0.138	ENSMUSG00000029478|Ncor2|chr5|-|A3SS|125037273|125037379|125037273|125037376|125037860|125037997|NEG
ENSMUSG00000032407|U2surp|chr9|-|SE|95500687|95500819|95495834|95495933|95502539|95502584	-0.138	ENSMUSG00000032407|U2surp|chr9|-|SE|95500687|95500819|95495834|95495933|95502539|95502584|NEG
ENSMUSG00000021711|Trappc13|chr13|-|SE|104152164|104152182|104150049|104150183|104154295|104154340	-0.137	ENSMUSG00000021711|Trappc13|chr13|-|SE|104152164|104152182|104150049|104150183|104154295|104154340|NEG
ENSMUSG00000022533|Atp13a3|chr16|-|SE|30321805|30321895|30312422|30315901|30322871|30322952	-0.132	ENSMUSG00000022533|Atp13a3|chr16|-|SE|30321805|30321895|30312422|30315901|30322871|30322952|NEG
ENSMUSG00000029227|Fip1l1|chr5|+|SE|74564518|74564626|74557039|74557149|74571098|74571192	-0.132	ENSMUSG00000029227|Fip1l1|chr5|+|SE|74564518|74564626|74557039|74557149|74571098|74571192|NEG
ENSMUSG00000020166|Cnot2|chr10|-|SE|116549032|116549175|116527826|116527949|116581452|116581465	-0.132	ENSMUSG00000020166|Cnot2|chr10|-|SE|116549032|116549175|116527826|116527949|116581452|116581465|NEG
ENSMUSG00000021668|Polk|chr13|-|SE|96496602|96496842|96495407|96495532|96501518|96501672	-0.13	ENSMUSG00000021668|Polk|chr13|-|SE|96496602|96496842|96495407|96495532|96501518|96501672|NEG
ENSMUSG00000024073|Birc6|chr17|+|A3SS|74594321|74594453|74594363|74594453|74593088|74593249	-0.13	ENSMUSG00000024073|Birc6|chr17|+|A3SS|74594321|74594453|74594363|74594453|74593088|74593249|NEG
ENSMUSG00000042265|Trem1|chr17|+|SE|48236997|48237354|48232770|48232843|48241485|48241669	-0.13	ENSMUSG00000042265|Trem1|chr17|+|SE|48236997|48237354|48232770|48232843|48241485|48241669|NEG
ENSMUSG00000021012|Zc3h14|chr12|+|SE|98779107|98779267|98774244|98774319|98783581|98783702	-0.129	ENSMUSG00000021012|Zc3h14|chr12|+|SE|98779107|98779267|98774244|98774319|98783581|98783702|NEG
ENSMUSG00000041890|Git2|chr5|-|SE|114743730|114743880|114739032|114739281|114745428|114745571	-0.128	ENSMUSG00000041890|Git2|chr5|-|SE|114743730|114743880|114739032|114739281|114745428|114745571|NEG
ENSMUSG00000038535|Zfp280d|chr9|+|SE|72351524|72351570|72339011|72339048|72360285|72360341	-0.127	ENSMUSG00000038535|Zfp280d|chr9|+|SE|72351524|72351570|72339011|72339048|72360285|72360341|NEG
ENSMUSG00000017686|Rhot1|chr11|+|SE|80255861|80255957|80254659|80254862|80265741|80266767	-0.127	ENSMUSG00000017686|Rhot1|chr11|+|SE|80255861|80255957|80254659|80254862|80265741|80266767|NEG
ENSMUSG00000040225|Prrc2c|chr1|-|SE|162674098|162674151|162670724|162673656|162676690|162676817	-0.127	ENSMUSG00000040225|Prrc2c|chr1|-|SE|162674098|162674151|162670724|162673656|162676690|162676817|NEG
ENSMUSG00000024317|Rnf138|chr18|+|SE|21024408|21024516|21020887|21020999|21026085|21027535	-0.126	ENSMUSG00000024317|Rnf138|chr18|+|SE|21024408|21024516|21020887|21020999|21026085|21027535|NEG
ENSMUSG00000002668|Dennd1c|chr17|-|RI|57066731|57067116|57066731|57066942|57067048|57067116	-0.126	ENSMUSG00000002668|Dennd1c|chr17|-|RI|57066731|57067116|57066731|57066942|57067048|57067116|NEG
ENSMUSG00000033808|Tmem87a|chr2|-|MXE|120373910|120373979|120374487|120374559|120371523|120371632|120375418|120375512	-0.126	ENSMUSG00000033808|Tmem87a|chr2|-|MXE|120373910|120373979|120374487|120374559|120371523|120371632|120375418|120375512|NEG
ENSMUSG00000028549|Itgb3bp|chr4|-|SE|99798695|99798762|99789600|99789679|99802096|99802232	-0.125	ENSMUSG00000028549|Itgb3bp|chr4|-|SE|99798695|99798762|99789600|99789679|99802096|99802232|NEG
ENSMUSG00000009741|Ubp1|chr9|+|SE|113959375|113959483|113958828|113958939|113964551|113964655	-0.125	ENSMUSG00000009741|Ubp1|chr9|+|SE|113959375|113959483|113958828|113958939|113964551|113964655|NEG
ENSMUSG00000039943|Plcb4|chr2|+|SE|135965051|135965087|135961718|135961819|135967024|135967166	-0.124	ENSMUSG00000039943|Plcb4|chr2|+|SE|135965051|135965087|135961718|135961819|135967024|135967166|NEG
ENSMUSG00000038506|Dcun1d2|chr8|-|SE|13261384|13261467|13255962|13257976|13271589|13271720	-0.123	ENSMUSG00000038506|Dcun1d2|chr8|-|SE|13261384|13261467|13255962|13257976|13271589|13271720|NEG
ENSMUSG00000054387|Mdm4|chr1|-|SE|133004653|133004721|133003790|133003890|133009136|133009192	-0.121	ENSMUSG00000054387|Mdm4|chr1|-|SE|133004653|133004721|133003790|133003890|133009136|133009192|NEG
ENSMUSG00000022770|Dlg1|chr16|+|SE|31771756|31771855|31743105|31743270|31781781|31781835	-0.12	ENSMUSG00000022770|Dlg1|chr16|+|SE|31771756|31771855|31743105|31743270|31781781|31781835|NEG
ENSMUSG00000029267|Mtf2|chr5|+|SE|108069161|108069523|108065715|108065965|108080824|108081023	-0.119	ENSMUSG00000029267|Mtf2|chr5|+|SE|108069161|108069523|108065715|108065965|108080824|108081023|NEG
ENSMUSG00000019961|Tmpo|chr10|-|SE|91153277|91153397|91153084|91153180|91158747|91158845	-0.119	ENSMUSG00000019961|Tmpo|chr10|-|SE|91153277|91153397|91153084|91153180|91158747|91158845|NEG
ENSMUSG00000028560|Usp1|chr4|+|SE|98926435|98926674|98923878|98924243|98928233|98928354	-0.119	ENSMUSG00000028560|Usp1|chr4|+|SE|98926435|98926674|98923878|98924243|98928233|98928354|NEG
ENSMUSG00000021224|Numb|chr12|-|SE|83855439|83855524|83842217|83842358|83876667|83876812	-0.118	ENSMUSG00000021224|Numb|chr12|-|SE|83855439|83855524|83842217|83842358|83876667|83876812|NEG
ENSMUSG00000024011|Pi16|chr17|+|SE|29326847|29327633|29326273|29326362|29327837|29327970	-0.118	ENSMUSG00000024011|Pi16|chr17|+|SE|29326847|29327633|29326273|29326362|29327837|29327970|NEG
ENSMUSG00000041890|Git2|chr5|-|SE|114743775|114743880|114739032|114739281|114745428|114745571	-0.118	ENSMUSG00000041890|Git2|chr5|-|SE|114743775|114743880|114739032|114739281|114745428|114745571|NEG
ENSMUSG00000021824|Ap3m1|chr14|-|SE|21045487|21045763|21040952|21041090|21052139|21052187	-0.117	ENSMUSG00000021824|Ap3m1|chr14|-|SE|21045487|21045763|21040952|21041090|21052139|21052187|NEG
ENSMUSG00000027130|Slc12a6|chr2|+|SE|112316240|112316285|112265824|112267092|112333382|112333477	-0.116	ENSMUSG00000027130|Slc12a6|chr2|+|SE|112316240|112316285|112265824|112267092|112333382|112333477|NEG
ENSMUSG00000031153|Gripap1|chrX|+|SE|7800535|7800583|7800156|7800341|7801176|7801208	-0.116	ENSMUSG00000031153|Gripap1|chrX|+|SE|7800535|7800583|7800156|7800341|7801176|7801208|NEG
ENSMUSG00000028560|Usp1|chr4|+|SE|98926454|98926674|98923809|98924243|98928233|98928354	-0.116	ENSMUSG00000028560|Usp1|chr4|+|SE|98926454|98926674|98923809|98924243|98928233|98928354|NEG
ENSMUSG00000045078|Rnf216|chr5|-|A3SS|143090119|143090929|143090119|143090758|143092994|143093125	-0.113	ENSMUSG00000045078|Rnf216|chr5|-|A3SS|143090119|143090929|143090119|143090758|143092994|143093125|NEG
ENSMUSG00000031608|Galnt7|chr8|-|MXE|57542511|57542694|57542834|57543017|57540019|57540137|57545328|57545408	-0.112	ENSMUSG00000031608|Galnt7|chr8|-|MXE|57542511|57542694|57542834|57543017|57540019|57540137|57545328|57545408|NEG
ENSMUSG00000055681|Cope|chr8|+|RI|70304633|70306651|70304633|70304696|70306498|70306651	-0.112	ENSMUSG00000055681|Cope|chr8|+|RI|70304633|70306651|70304633|70304696|70306498|70306651|NEG
ENSMUSG00000026193|Fn1|chr1|-|SE|71603659|71603929|71602309|71602497|71604969|71605083	-0.11	ENSMUSG00000026193|Fn1|chr1|-|SE|71603659|71603929|71602309|71602497|71604969|71605083|NEG
ENSMUSG00000040723|Rcsd1|chr1|-|SE|165663565|165663655|165659372|165659444|165664948|165665050	-0.11	ENSMUSG00000040723|Rcsd1|chr1|-|SE|165663565|165663655|165659372|165659444|165664948|165665050|NEG
ENSMUSG00000014668|Chfr|chr5|+|SE|110140116|110140189|110136050|110136194|110140353|110140453	-0.108	ENSMUSG00000014668|Chfr|chr5|+|SE|110140116|110140189|110136050|110136194|110140353|110140453|NEG
ENSMUSG00000018999|Slc35b4|chr6|-|SE|34172627|34172755|34170460|34170574|34176777|34177082	-0.107	ENSMUSG00000018999|Slc35b4|chr6|-|SE|34172627|34172755|34170460|34170574|34176777|34177082|NEG
ENSMUSG00000025326|Ube3a|chr7|+|SE|59243349|59243469|59228801|59229271|59247172|59247198	-0.107	ENSMUSG00000025326|Ube3a|chr7|+|SE|59243349|59243469|59228801|59229271|59247172|59247198|NEG
ENSMUSG00000098090|2700099C18Rik|chr17|+|A3SS|94771112|94771238|94771133|94771238|94766856|94766947	-0.107	ENSMUSG00000098090|2700099C18Rik|chr17|+|A3SS|94771112|94771238|94771133|94771238|94766856|94766947|NEG
ENSMUSG00000022674|Ube2v2|chr16|-|SE|15577014|15577140|15552676|15556543|15581058|15581207	-0.107	ENSMUSG00000022674|Ube2v2|chr16|-|SE|15577014|15577140|15552676|15556543|15581058|15581207|NEG
ENSMUSG00000026790|Odf2|chr2|+|SE|29893000|29893154|29892185|29892276|29893443|29893512	-0.104	ENSMUSG00000026790|Odf2|chr2|+|SE|29893000|29893154|29892185|29892276|29893443|29893512|NEG
ENSMUSG00000029267|Mtf2|chr5|+|SE|108073306|108073454|108065673|108065965|108080824|108080841	-0.103	ENSMUSG00000029267|Mtf2|chr5|+|SE|108073306|108073454|108065673|108065965|108080824|108080841|NEG
ENSMUSG00000022770|Dlg1|chr16|+|MXE|31846833|31846933|31847635|31847669|31842769|31842839|31853842|31853884	-0.101	ENSMUSG00000022770|Dlg1|chr16|+|MXE|31846833|31846933|31847635|31847669|31842769|31842839|31853842|31853884|NEG
ENSMUSG00000020831|0610010K14Rik|chr11|-|SE|70235695|70235800|70235205|70235464|70236023|70236211	-0.1	ENSMUSG00000020831|0610010K14Rik|chr11|-|SE|70235695|70235800|70235205|70235464|70236023|70236211|NEG
ENSMUSG00000040225|Prrc2c|chr1|-|SE|162675604|162675841|162670726|162673656|162676690|162676817	-0.1	ENSMUSG00000040225|Prrc2c|chr1|-|SE|162675604|162675841|162670726|162673656|162676690|162676817|NEG
ENSMUSG00000029209|Gnpda2|chr5|-|A3SS|69579507|69579692|69579507|69579686|69584973|69585156	-0.1	ENSMUSG00000029209|Gnpda2|chr5|-|A3SS|69579507|69579692|69579507|69579686|69584973|69585156|NEG
ENSMUSG00000033713|Foxn3|chr12|-|SE|99219597|99219663|99209460|99209566|99291236|99291278	-0.099	ENSMUSG00000033713|Foxn3|chr12|-|SE|99219597|99219663|99209460|99209566|99291236|99291278|NEG
ENSMUSG00000038822|Hace1|chr10|+|SE|45686601|45686733|45677066|45677263|45700576|45700675	-0.099	ENSMUSG00000038822|Hace1|chr10|+|SE|45686601|45686733|45677066|45677263|45700576|45700675|NEG
ENSMUSG00000034160|Ogt|chrX|+|A3SS|101642975|101643156|101643005|101643156|101640217|101640322	-0.099	ENSMUSG00000034160|Ogt|chrX|+|A3SS|101642975|101643156|101643005|101643156|101640217|101640322|NEG
ENSMUSG00000041769|Ppp2r2d|chr7|+|SE|138869689|138869855|138868409|138868507|138870389|138870502	-0.098	ENSMUSG00000041769|Ppp2r2d|chr7|+|SE|138869689|138869855|138868409|138868507|138870389|138870502|NEG
ENSMUSG00000002010|Idh3g|chrX|-|SE|73782297|73782309|73782005|73782103|73782674|73782716	-0.098	ENSMUSG00000002010|Idh3g|chrX|-|SE|73782297|73782309|73782005|73782103|73782674|73782716|NEG
ENSMUSG00000040242|Fgfr1op2|chr6|+|SE|146592633|146592747|146589893|146590036|146595175|146595289	-0.098	ENSMUSG00000040242|Fgfr1op2|chr6|+|SE|146592633|146592747|146589893|146590036|146595175|146595289|NEG
ENSMUSG00000026648|Dclre1c|chr2|+|A5SS|3437029|3437090|3437029|3437086|3437675|3437748	-0.097	ENSMUSG00000026648|Dclre1c|chr2|+|A5SS|3437029|3437090|3437029|3437086|3437675|3437748|NEG
ENSMUSG00000032525|Nktr|chr9|+|SE|121738387|121738415|121731477|121731565|121741121|121741151	-0.096	ENSMUSG00000032525|Nktr|chr9|+|SE|121738387|121738415|121731477|121731565|121741121|121741151|NEG
ENSMUSG00000063659|Zbtb18|chr1|+|RI|177447088|177450764|177447088|177447776|177447888|177450764	-0.095	ENSMUSG00000063659|Zbtb18|chr1|+|RI|177447088|177450764|177447088|177447776|177447888|177450764|NEG
ENSMUSG00000097412|1810014B01Rik|chr10|+|SE|86688533|86689138|86685879|86685996|86692217|86692305	-0.094	ENSMUSG00000097412|1810014B01Rik|chr10|+|SE|86688533|86689138|86685879|86685996|86692217|86692305|NEG
ENSMUSG00000029068|Ccnl2|chr4|+|A3SS|155818538|155820428|155820328|155820428|155817922|155817987	-0.094	ENSMUSG00000029068|Ccnl2|chr4|+|A3SS|155818538|155820428|155820328|155820428|155817922|155817987|NEG
ENSMUSG00000041890|Git2|chr5|-|MXE|114739032|114739281|114743775|114743880|114733860|114733943|114745428|114745571	-0.094	ENSMUSG00000041890|Git2|chr5|-|MXE|114739032|114739281|114743775|114743880|114733860|114733943|114745428|114745571|NEG
ENSMUSG00000041143|Tmco4|chr4|+|SE|138977207|138977322|138972887|138972989|138983620|138983765	-0.092	ENSMUSG00000041143|Tmco4|chr4|+|SE|138977207|138977322|138972887|138972989|138983620|138983765|NEG
ENSMUSG00000020590|Snx13|chr12|+|A3SS|35119732|35119905|35119765|35119905|35112434|35112504	-0.092	ENSMUSG00000020590|Snx13|chr12|+|A3SS|35119732|35119905|35119765|35119905|35112434|35112504|NEG
ENSMUSG00000037134|Prmt9|chr8|+|A3SS|77562413|77562516|77562448|77562516|77560806|77560974	-0.091	ENSMUSG00000037134|Prmt9|chr8|+|A3SS|77562413|77562516|77562448|77562516|77560806|77560974|NEG
ENSMUSG00000017843|Ppp2r5c|chr12|+|SE|110574744|110574861|110570695|110570768|110580400|110580804	-0.091	ENSMUSG00000017843|Ppp2r5c|chr12|+|SE|110574744|110574861|110570695|110570768|110580400|110580804|NEG
ENSMUSG00000035021|Baz1a|chr12|-|A3SS|54927563|54927713|54927563|54927624|54929526|54929665	-0.091	ENSMUSG00000035021|Baz1a|chr12|-|A3SS|54927563|54927713|54927563|54927624|54929526|54929665|NEG
ENSMUSG00000025326|Ube3a|chr7|+|SE|59243349|59243469|59240966|59241033|59247172|59247198	-0.091	ENSMUSG00000025326|Ube3a|chr7|+|SE|59243349|59243469|59240966|59241033|59247172|59247198|NEG
ENSMUSG00000042323|Pbrm1|chr14|+|SE|31110414|31110579|31107108|31107310|31113848|31114004	-0.09	ENSMUSG00000042323|Pbrm1|chr14|+|SE|31110414|31110579|31107108|31107310|31113848|31114004|NEG
ENSMUSG00000038975|Rabggtb|chr3|-|A3SS|153908789|153908915|153908789|153908899|153909348|153909459	-0.089	ENSMUSG00000038975|Rabggtb|chr3|-|A3SS|153908789|153908915|153908789|153908899|153909348|153909459|NEG
ENSMUSG00000034647|Ankrd12|chr17|-|SE|66042532|66042601|66036797|66037639|66049785|66049933	-0.088	ENSMUSG00000034647|Ankrd12|chr17|-|SE|66042532|66042601|66036797|66037639|66049785|66049933|NEG
ENSMUSG00000040462|Os9|chr10|-|SE|127096914|127097079|127096629|127096742|127097931|127098121	-0.088	ENSMUSG00000040462|Os9|chr10|-|SE|127096914|127097079|127096629|127096742|127097931|127098121|NEG
ENSMUSG00000021109|Hif1a|chr12|+|A3SS|73941687|73941852|73941729|73941852|73940347|73940631	-0.087	ENSMUSG00000021109|Hif1a|chr12|+|A3SS|73941687|73941852|73941729|73941852|73940347|73940631|NEG
ENSMUSG00000032498|Mlh1|chr9|-|SE|111252863|111252976|111249219|111249313|111255627|111255716	-0.087	ENSMUSG00000032498|Mlh1|chr9|-|SE|111252863|111252976|111249219|111249313|111255627|111255716|NEG
ENSMUSG00000043962|Thrap3|chr4|-|SE|126194316|126194404|126186245|126186588|126202569|126202659	-0.087	ENSMUSG00000043962|Thrap3|chr4|-|SE|126194316|126194404|126186245|126186588|126202569|126202659|NEG
ENSMUSG00000020715|Ern1|chr11|-|SE|106437089|106437123|106434680|106434987|106458907|106459028	-0.086	ENSMUSG00000020715|Ern1|chr11|-|SE|106437089|106437123|106434680|106434987|106458907|106459028|NEG
ENSMUSG00000035545|Leng8|chr7|+|A3SS|4143258|4143697|4143418|4143697|4142833|4143037	-0.086	ENSMUSG00000035545|Leng8|chr7|+|A3SS|4143258|4143697|4143418|4143697|4142833|4143037|NEG
ENSMUSG00000059273|Zc3h4|chr7|+|SE|16432773|16433022|16429530|16429910|16434020|16437695	-0.086	ENSMUSG00000059273|Zc3h4|chr7|+|SE|16432773|16433022|16429530|16429910|16434020|16437695|NEG
ENSMUSG00000023994|Nfya|chr17|-|A3SS|48392339|48392500|48392339|48392488|48393179|48393285	-0.083	ENSMUSG00000023994|Nfya|chr17|-|A3SS|48392339|48392500|48392339|48392488|48393179|48393285|NEG
ENSMUSG00000036167|Pphln1|chr15|+|SE|93452116|93452173|93441500|93441712|93455450|93455530	-0.083	ENSMUSG00000036167|Pphln1|chr15|+|SE|93452116|93452173|93441500|93441712|93455450|93455530|NEG
ENSMUSG00000056692|D17Wsu92e|chr17|-|SE|27768135|27768239|27751245|27753995|27786070|27786268	-0.082	ENSMUSG00000056692|D17Wsu92e|chr17|-|SE|27768135|27768239|27751245|27753995|27786070|27786268|NEG
ENSMUSG00000040025|Ythdf2|chr4|-|SE|132205513|132205715|132186687|132186947|132210751|132210809	-0.081	ENSMUSG00000040025|Ythdf2|chr4|-|SE|132205513|132205715|132186687|132186947|132210751|132210809|NEG
ENSMUSG00000026977|Marchf7|chr2|+|A3SS|60233898|60234997|60233933|60234997|60232199|60232367	-0.079	ENSMUSG00000026977|Marchf7|chr2|+|A3SS|60233898|60234997|60233933|60234997|60232199|60232367|NEG
ENSMUSG00000014592|Camta1|chr4|-|SE|151835813|151835883|151830417|151830536|151861624|151861669	-0.078	ENSMUSG00000014592|Camta1|chr4|-|SE|151835813|151835883|151830417|151830536|151861624|151861669|NEG
ENSMUSG00000092607|Scnm1|chr3|-|SE|95130163|95130358|95129535|95129883|95132824|95132913	-0.078	ENSMUSG00000092607|Scnm1|chr3|-|SE|95130163|95130358|95129535|95129883|95132824|95132913|NEG
ENSMUSG00000031767|Nudt7|chr8|+|SE|114136337|114136491|114133556|114133700|114147894|114147993	-0.077	ENSMUSG00000031767|Nudt7|chr8|+|SE|114136337|114136491|114133556|114133700|114147894|114147993|NEG
ENSMUSG00000025958|Creb1|chr1|+|SE|64561752|64561865|64558502|64558649|64566216|64566317	-0.077	ENSMUSG00000025958|Creb1|chr1|+|SE|64561752|64561865|64558502|64558649|64566216|64566317|NEG
ENSMUSG00000092417|Gpank1|chr17|+|SE|35122228|35122460|35121454|35121550|35123052|35123301	-0.076	ENSMUSG00000092417|Gpank1|chr17|+|SE|35122228|35122460|35121454|35121550|35123052|35123301|NEG
ENSMUSG00000033713|Foxn3|chr12|-|SE|99219600|99219663|99209502|99209566|99291236|99291277	-0.076	ENSMUSG00000033713|Foxn3|chr12|-|SE|99219600|99219663|99209502|99209566|99291236|99291277|NEG
ENSMUSG00000009073|Nf2|chr11|-|SE|4799860|4799995|4794842|4794917|4803677|4803753	-0.076	ENSMUSG00000009073|Nf2|chr11|-|SE|4799860|4799995|4794842|4794917|4803677|4803753|NEG
ENSMUSG00000017210|Med24|chr11|-|SE|98717708|98717765|98716413|98716525|98717909|98718142	-0.076	ENSMUSG00000017210|Med24|chr11|-|SE|98717708|98717765|98716413|98716525|98717909|98718142|NEG
ENSMUSG00000042446|Zmym4|chr4|-|SE|126907085|126907236|126906520|126906636|126910789|126911002	-0.076	ENSMUSG00000042446|Zmym4|chr4|-|SE|126907085|126907236|126906520|126906636|126910789|126911002|NEG
ENSMUSG00000039285|Azi2|chr9|+|SE|118049896|118049996|118049309|118049435|118051353|118051502	-0.076	ENSMUSG00000039285|Azi2|chr9|+|SE|118049896|118049996|118049309|118049435|118051353|118051502|NEG
ENSMUSG00000028149|Rap1gds1|chr3|-|SE|138983721|138983868|138965867|138965996|139015545|139015671	-0.075	ENSMUSG00000028149|Rap1gds1|chr3|-|SE|138983721|138983868|138965867|138965996|139015545|139015671|NEG
ENSMUSG00000030509|Asb7|chr7|-|SE|66687883|66687958|66681704|66681808|66688822|66688920	-0.075	ENSMUSG00000030509|Asb7|chr7|-|SE|66687883|66687958|66681704|66681808|66688822|66688920|NEG
ENSMUSG00000040407|Akap9|chr5|+|SE|3954396|3954450|3951689|3951734|3954791|3954962	-0.074	ENSMUSG00000040407|Akap9|chr5|+|SE|3954396|3954450|3951689|3951734|3954791|3954962|NEG
ENSMUSG00000020250|Txnrd1|chr10|+|SE|82860523|82860630|82859206|82859300|82874612|82874735	-0.074	ENSMUSG00000020250|Txnrd1|chr10|+|SE|82860523|82860630|82859206|82859300|82874612|82874735|NEG
ENSMUSG00000032803|Cdv3|chr9|-|A3SS|103353103|103356029|103353103|103355313|103356279|103356439	-0.074	ENSMUSG00000032803|Cdv3|chr9|-|A3SS|103353103|103356029|103353103|103355313|103356279|103356439|NEG
ENSMUSG00000049550|Clip1|chr5|-|SE|123635173|123635278|123630224|123631169|123640493|123640554	-0.074	ENSMUSG00000049550|Clip1|chr5|-|SE|123635173|123635278|123630224|123631169|123640493|123640554|NEG
ENSMUSG00000026743|Mllt10|chr2|+|SE|18101457|18101512|18071124|18071204|18109781|18109891	-0.073	ENSMUSG00000026743|Mllt10|chr2|+|SE|18101457|18101512|18071124|18071204|18109781|18109891|NEG
ENSMUSG00000021910|Nisch|chr14|-|SE|31182498|31182640|31180821|31180949|31184941|31185050	-0.073	ENSMUSG00000021910|Nisch|chr14|-|SE|31182498|31182640|31180821|31180949|31184941|31185050|NEG
ENSMUSG00000042323|Pbrm1|chr14|+|MXE|31110414|31110579|31113848|31114004|31107108|31107310|31117012|31117083	-0.072	ENSMUSG00000042323|Pbrm1|chr14|+|MXE|31110414|31110579|31113848|31114004|31107108|31107310|31117012|31117083|NEG
ENSMUSG00000029767|Calu|chr6|+|SE|29361559|29361753|29361293|29361487|29366039|29366206	-0.071	ENSMUSG00000029767|Calu|chr6|+|SE|29361559|29361753|29361293|29361487|29366039|29366206|NEG
ENSMUSG00000004455|Ppp1cc|chr5|+|RI|122174054|122175273|122174054|122174115|122174979|122175273	-0.07	ENSMUSG00000004455|Ppp1cc|chr5|+|RI|122174054|122175273|122174054|122174115|122174979|122175273|NEG
ENSMUSG00000037514|Pank2|chr2|+|SE|131287473|131287597|131274076|131274263|131293398|131293457	-0.069	ENSMUSG00000037514|Pank2|chr2|+|SE|131287473|131287597|131274076|131274263|131293398|131293457|NEG
ENSMUSG00000005262|Ufd1|chr16|+|A5SS|18814829|18814962|18814829|18814936|18815328|18815361	-0.068	ENSMUSG00000005262|Ufd1|chr16|+|A5SS|18814829|18814962|18814829|18814936|18815328|18815361|NEG
ENSMUSG00000040785|Ttc3|chr16|+|SE|94429358|94429685|94427790|94427927|94431787|94432039	-0.068	ENSMUSG00000040785|Ttc3|chr16|+|SE|94429358|94429685|94427790|94427927|94431787|94432039|NEG
ENSMUSG00000029647|Pan3|chr5|+|SE|147488110|147488258|147455117|147455188|147519504|147519752	-0.068	ENSMUSG00000029647|Pan3|chr5|+|SE|147488110|147488258|147455117|147455188|147519504|147519752|NEG
ENSMUSG00000014668|Chfr|chr5|+|SE|110144771|110144987|110144590|110144650|110146469|110146547	-0.068	ENSMUSG00000014668|Chfr|chr5|+|SE|110144771|110144987|110144590|110144650|110146469|110146547|NEG
ENSMUSG00000053754|Chd8|chr14|-|SE|52202143|52202323|52201630|52201747|52202503|52202617	-0.067	ENSMUSG00000053754|Chd8|chr14|-|SE|52202143|52202323|52201630|52201747|52202503|52202617|NEG
ENSMUSG00000057363|Uxs1|chr1|-|SE|43790463|43790550|43780064|43780169|43797244|43797305	-0.067	ENSMUSG00000057363|Uxs1|chr1|-|SE|43790463|43790550|43780064|43780169|43797244|43797305|NEG
ENSMUSG00000066735|Vkorc1l1|chr5|+|SE|129978518|129978628|129941969|129942365|129982140|129982241	-0.067	ENSMUSG00000066735|Vkorc1l1|chr5|+|SE|129978518|129978628|129941969|129942365|129982140|129982241|NEG
ENSMUSG00000021375|Kif13a|chr13|-|SE|46750701|46750773|46750512|46750626|46752080|46752543	-0.067	ENSMUSG00000021375|Kif13a|chr13|-|SE|46750701|46750773|46750512|46750626|46752080|46752543|NEG
ENSMUSG00000027620|Rbm39|chr2|-|SE|156178879|156178952|156177632|156177906|156179176|156179240	-0.066	ENSMUSG00000027620|Rbm39|chr2|-|SE|156178879|156178952|156177632|156177906|156179176|156179240|NEG
ENSMUSG00000024908|Ppp6r3|chr19|-|A3SS|3473768|3473866|3473768|3473815|3478277|3478364	-0.066	ENSMUSG00000024908|Ppp6r3|chr19|-|A3SS|3473768|3473866|3473768|3473815|3478277|3478364|NEG
ENSMUSG00000030126|Tmcc1|chr6|-|SE|116107311|116107516|116043767|116043805|116133766|116133903	-0.066	ENSMUSG00000030126|Tmcc1|chr6|-|SE|116107311|116107516|116043767|116043805|116133766|116133903|NEG
ENSMUSG00000029186|Pi4k2b|chr5|+|SE|52748368|52748505|52741573|52741968|52750607|52750808	-0.065	ENSMUSG00000029186|Pi4k2b|chr5|+|SE|52748368|52748505|52741573|52741968|52750607|52750808|NEG
ENSMUSG00000029048|Rer1|chr4|-|SE|155083108|155083317|155082666|155082754|155086204|155086371	-0.065	ENSMUSG00000029048|Rer1|chr4|-|SE|155083108|155083317|155082666|155082754|155086204|155086371|NEG
ENSMUSG00000059669|Taf1b|chr12|+|SE|24509083|24509181|24504946|24505034|24509453|24509549	-0.065	ENSMUSG00000059669|Taf1b|chr12|+|SE|24509083|24509181|24504946|24505034|24509453|24509549|NEG
ENSMUSG00000053333|Dis3l2|chr1|+|SE|86791415|86791457|86760287|86760389|86821221|86821450	-0.064	ENSMUSG00000053333|Dis3l2|chr1|+|SE|86791415|86791457|86760287|86760389|86821221|86821450|NEG
ENSMUSG00000032527|Pccb|chr9|-|SE|101012704|101012815|100999164|100999273|101023135|101023249	-0.064	ENSMUSG00000032527|Pccb|chr9|-|SE|101012704|101012815|100999164|100999273|101023135|101023249|NEG
ENSMUSG00000027620|Rbm39|chr2|-|SE|156178879|156178952|156177160|156177385|156179176|156179240	-0.064	ENSMUSG00000027620|Rbm39|chr2|-|SE|156178879|156178952|156177160|156177385|156179176|156179240|NEG
ENSMUSG00000066036|Ubr4|chr4|+|SE|139435948|139436032|139435009|139435184|139436121|139436259	-0.062	ENSMUSG00000066036|Ubr4|chr4|+|SE|139435948|139436032|139435009|139435184|139436121|139436259|NEG
ENSMUSG00000022721|Trmt2a|chr16|+|SE|18252923|18253020|18252401|18252477|18253099|18253112	-0.06	ENSMUSG00000022721|Trmt2a|chr16|+|SE|18252923|18253020|18252401|18252477|18253099|18253112|NEG
ENSMUSG00000014075|Tctex1d2|chr16|+|SE|32425240|32425310|32422819|32422953|32426857|32426921	-0.06	ENSMUSG00000014075|Tctex1d2|chr16|+|SE|32425240|32425310|32422819|32422953|32426857|32426921|NEG
ENSMUSG00000027346|Gpcpd1|chr2|-|SE|132553956|132554080|132550313|132550554|132556934|132556976	-0.058	ENSMUSG00000027346|Gpcpd1|chr2|-|SE|132553956|132554080|132550313|132550554|132556934|132556976|NEG
ENSMUSG00000010048|Ifrd2|chr9|+|RI|107590297|107590662|107590297|107590422|107590504|107590662	-0.058	ENSMUSG00000010048|Ifrd2|chr9|+|RI|107590297|107590662|107590297|107590422|107590504|107590662|NEG
ENSMUSG00000020376|Rnf130|chr11|+|SE|50099245|50099339|50095775|50095980|50104548|50104753	-0.057	ENSMUSG00000020376|Rnf130|chr11|+|SE|50099245|50099339|50095775|50095980|50104548|50104753|NEG
ENSMUSG00000033502|Cdc14a|chr3|-|SE|116404542|116404618|116392821|116392914|116422566|116422657	-0.057	ENSMUSG00000033502|Cdc14a|chr3|-|SE|116404542|116404618|116392821|116392914|116422566|116422657|NEG
ENSMUSG00000040669|Phc1|chr6|-|A5SS|122334965|122335083|122334972|122335083|122334069|122334150	-0.056	ENSMUSG00000040669|Phc1|chr6|-|A5SS|122334965|122335083|122334972|122335083|122334069|122334150|NEG
ENSMUSG00000026860|Sh3glb2|chr2|-|SE|30348554|30348617|30347080|30347104|30350287|30350380	-0.056	ENSMUSG00000026860|Sh3glb2|chr2|-|SE|30348554|30348617|30347080|30347104|30350287|30350380|NEG
ENSMUSG00000017561|Crlf3|chr11|-|SE|80048591|80048704|80046492|80047737|80056451|80056584	-0.055	ENSMUSG00000017561|Crlf3|chr11|-|SE|80048591|80048704|80046492|80047737|80056451|80056584|NEG
ENSMUSG00000035021|Baz1a|chr12|-|A3SS|54927563|54927710|54927563|54927624|54929526|54929665	-0.055	ENSMUSG00000035021|Baz1a|chr12|-|A3SS|54927563|54927710|54927563|54927624|54929526|54929665|NEG
ENSMUSG00000041346|Wrap53|chr11|-|A5SS|69563303|69563436|69563319|69563436|69562648|69562857	-0.055	ENSMUSG00000041346|Wrap53|chr11|-|A5SS|69563303|69563436|69563319|69563436|69562648|69562857|NEG
ENSMUSG00000028180|Zranb2|chr3|+|SE|157536447|157536586|157536333|157536386|157537586|157537669	-0.055	ENSMUSG00000028180|Zranb2|chr3|+|SE|157536447|157536586|157536333|157536386|157537586|157537669|NEG
ENSMUSG00000036257|Pnpla8|chr12|+|SE|44304910|44305105|44299233|44299291|44307918|44308114	-0.055	ENSMUSG00000036257|Pnpla8|chr12|+|SE|44304910|44305105|44299233|44299291|44307918|44308114|NEG
ENSMUSG00000021180|Rps6ka5|chr12|-|SE|100619525|100619641|100615996|100616104|100654270|100654489	-0.055	ENSMUSG00000021180|Rps6ka5|chr12|-|SE|100619525|100619641|100615996|100616104|100654270|100654489|NEG
ENSMUSG00000031902|Nfatc3|chr8|+|SE|106119321|106119425|106108124|106109129|106127917|106128443	-0.054	ENSMUSG00000031902|Nfatc3|chr8|+|SE|106119321|106119425|106108124|106109129|106127917|106128443|NEG
ENSMUSG00000064289|Tank|chr2|+|SE|61593996|61594201|61593096|61593208|61613650|61613798	-0.054	ENSMUSG00000064289|Tank|chr2|+|SE|61593996|61594201|61593096|61593208|61613650|61613798|NEG
ENSMUSG00000028180|Zranb2|chr3|+|SE|157536482|157536586|157536333|157536386|157537586|157537669	-0.054	ENSMUSG00000028180|Zranb2|chr3|+|SE|157536482|157536586|157536333|157536386|157537586|157537669|NEG
ENSMUSG00000020248|Nfyb|chr10|-|SE|82754964|82755095|82749286|82752604|82756701|82756795	-0.054	ENSMUSG00000020248|Nfyb|chr10|-|SE|82754964|82755095|82749286|82752604|82756701|82756795|NEG
ENSMUSG00000029458|Brap|chr5|+|SE|121663241|121663491|121662040|121662161|121665098|121665288	-0.053	ENSMUSG00000029458|Brap|chr5|+|SE|121663241|121663491|121662040|121662161|121665098|121665288|NEG
ENSMUSG00000020827|Mink1|chr11|+|SE|70608588|70608699|70608340|70608426|70608839|70608958	-0.051	ENSMUSG00000020827|Mink1|chr11|+|SE|70608588|70608699|70608340|70608426|70608839|70608958|NEG
ENSMUSG00000069020|Urm1|chr2|+|SE|29842461|29842546|29841401|29841483|29842720|29842769	-0.051	ENSMUSG00000069020|Urm1|chr2|+|SE|29842461|29842546|29841401|29841483|29842720|29842769|NEG
ENSMUSG00000021500|Ddx46|chr13|+|RI|55659019|55660799|55659019|55659098|55660716|55660799	0.051	ENSMUSG00000021500|Ddx46|chr13|+|RI|55659019|55660799|55659019|55659098|55660716|55660799|POS
ENSMUSG00000038828|Tmem214|chr5|+|RI|30871419|30871855|30871419|30871570|30871720|30871855	0.052	ENSMUSG00000038828|Tmem214|chr5|+|RI|30871419|30871855|30871419|30871570|30871720|30871855|POS
ENSMUSG00000030805|Stx4a|chr7|+|RI|127846019|127846276|127846019|127846128|127846199|127846276	0.052	ENSMUSG00000030805|Stx4a|chr7|+|RI|127846019|127846276|127846019|127846128|127846199|127846276|POS
ENSMUSG00000061028|Clasrp|chr7|-|RI|19591992|19594552|19591992|19592077|19594472|19594552	0.052	ENSMUSG00000061028|Clasrp|chr7|-|RI|19591992|19594552|19591992|19592077|19594472|19594552|POS
ENSMUSG00000035949|Fbxw2|chr2|-|A3SS|34822557|34823067|34822557|34822975|34825961|34826070	0.052	ENSMUSG00000035949|Fbxw2|chr2|-|A3SS|34822557|34823067|34822557|34822975|34825961|34826070|POS
ENSMUSG00000029227|Fip1l1|chr5|+|SE|74547106|74547175|74546694|74546825|74557039|74557149	0.052	ENSMUSG00000029227|Fip1l1|chr5|+|SE|74547106|74547175|74546694|74546825|74557039|74557149|POS
ENSMUSG00000020744|Slc25a19|chr11|-|SE|115624198|115624368|115623411|115624027|115628064|115628093	0.052	ENSMUSG00000020744|Slc25a19|chr11|-|SE|115624198|115624368|115623411|115624027|115628064|115628093|POS
ENSMUSG00000073468|Sft2d1|chr17|+|RI|8321799|8323335|8321799|8321835|8323276|8323335	0.052	ENSMUSG00000073468|Sft2d1|chr17|+|RI|8321799|8323335|8321799|8321835|8323276|8323335|POS
ENSMUSG00000028107|Tars2|chr3|-|RI|95748486|95750417|95748486|95748633|95750338|95750417	0.053	ENSMUSG00000028107|Tars2|chr3|-|RI|95748486|95750417|95748486|95748633|95750338|95750417|POS
ENSMUSG00000040688|Tbl3|chr17|-|RI|24704810|24705317|24704810|24704886|24705146|24705317	0.053	ENSMUSG00000040688|Tbl3|chr17|-|RI|24704810|24705317|24704810|24704886|24705146|24705317|POS
ENSMUSG00000034544|Rsrc1|chr3|+|SE|67355473|67355626|67349908|67350015|67356220|67356559	0.053	ENSMUSG00000034544|Rsrc1|chr3|+|SE|67355473|67355626|67349908|67350015|67356220|67356559|POS
ENSMUSG00000014873|Surf2|chr2|+|RI|26917427|26919055|26917427|26917531|26918864|26919055	0.053	ENSMUSG00000014873|Surf2|chr2|+|RI|26917427|26919055|26917427|26917531|26918864|26919055|POS
ENSMUSG00000026705|Klhl20|chr1|-|RI|161098262|161099285|161098262|161098396|161099141|161099285	0.054	ENSMUSG00000026705|Klhl20|chr1|-|RI|161098262|161099285|161098262|161098396|161099141|161099285|POS
ENSMUSG00000031511|Arhgef7|chr8|+|RI|11781154|11782655|11781154|11781239|11782524|11782655	0.054	ENSMUSG00000031511|Arhgef7|chr8|+|RI|11781154|11782655|11781154|11781239|11782524|11782655|POS
ENSMUSG00000039456|Morc3|chr16|+|RI|93862413|93862715|93862413|93862536|93862640|93862715	0.055	ENSMUSG00000039456|Morc3|chr16|+|RI|93862413|93862715|93862413|93862536|93862640|93862715|POS
ENSMUSG00000045411|2410002F23Rik|chr7|+|RI|44250308|44252312|44250308|44250340|44250612|44252312	0.055	ENSMUSG00000045411|2410002F23Rik|chr7|+|RI|44250308|44252312|44250308|44250340|44250612|44252312|POS
ENSMUSG00000028068|Iqgap3|chr3|+|RI|88100625|88101595|88100625|88100716|88101427|88101595	0.055	ENSMUSG00000028068|Iqgap3|chr3|+|RI|88100625|88101595|88100625|88100716|88101427|88101595|POS
ENSMUSG00000034729|Mrps10|chr17|+|RI|47372426|47372645|47372426|47372491|47372572|47372645	0.055	ENSMUSG00000034729|Mrps10|chr17|+|RI|47372426|47372645|47372426|47372491|47372572|47372645|POS
ENSMUSG00000058388|Phtf1|chr3|+|RI|103997432|103998803|103997432|103997705|103998671|103998803	0.055	ENSMUSG00000058388|Phtf1|chr3|+|RI|103997432|103998803|103997432|103997705|103998671|103998803|POS
ENSMUSG00000037318|Traf3ip3|chr1|-|RI|193194824|193195136|193194824|193194849|193195072|193195136	0.055	ENSMUSG00000037318|Traf3ip3|chr1|-|RI|193194824|193195136|193194824|193194849|193195072|193195136|POS
ENSMUSG00000032498|Mlh1|chr9|-|A5SS|111247875|111249313|111249219|111249313|111247249|111247403	0.055	ENSMUSG00000032498|Mlh1|chr9|-|A5SS|111247875|111249313|111249219|111249313|111247249|111247403|POS
ENSMUSG00000020898|Ctc1|chr11|+|A3SS|69022376|69022614|69022392|69022614|69021029|69021193	0.055	ENSMUSG00000020898|Ctc1|chr11|+|A3SS|69022376|69022614|69022392|69022614|69021029|69021193|POS
ENSMUSG00000028649|Macf1|chr4|-|SE|123386548|123386557|123385454|123385686|123387227|123387431	0.056	ENSMUSG00000028649|Macf1|chr4|-|SE|123386548|123386557|123385454|123385686|123387227|123387431|POS
ENSMUSG00000014075|Tctex1d2|chr16|+|RI|32425240|32426921|32425240|32425310|32426857|32426921	0.056	ENSMUSG00000014075|Tctex1d2|chr16|+|RI|32425240|32426921|32425240|32425310|32426857|32426921|POS
ENSMUSG00000017760|Ctsa|chr2|+|RI|164834029|164834431|164834029|164834208|164834319|164834431	0.056	ENSMUSG00000017760|Ctsa|chr2|+|RI|164834029|164834431|164834029|164834208|164834319|164834431|POS
ENSMUSG00000090272|Mndal|chr1|-|SE|173868199|173868319|173865398|173865557|173871377|173871545	0.056	ENSMUSG00000090272|Mndal|chr1|-|SE|173868199|173868319|173865398|173865557|173871377|173871545|POS
ENSMUSG00000058267|Mrps14|chr1|+|A3SS|160196920|160197104|160196945|160197104|160195214|160195311	0.056	ENSMUSG00000058267|Mrps14|chr1|+|A3SS|160196920|160197104|160196945|160197104|160195214|160195311|POS
ENSMUSG00000032621|Srek1|chr13|-|A3SS|103758185|103758488|103758185|103758300|103759168|103759299	0.057	ENSMUSG00000032621|Srek1|chr13|-|A3SS|103758185|103758488|103758185|103758300|103759168|103759299|POS
ENSMUSG00000016921|Srsf6|chr2|+|RI|162931993|162933550|162931993|162932142|162933425|162933550	0.057	ENSMUSG00000016921|Srsf6|chr2|+|RI|162931993|162933550|162931993|162932142|162933425|162933550|POS
ENSMUSG00000021557|Agtpbp1|chr13|-|RI|59473687|59474712|59473687|59473817|59474531|59474712	0.057	ENSMUSG00000021557|Agtpbp1|chr13|-|RI|59473687|59474712|59473687|59473817|59474531|59474712|POS
ENSMUSG00000034707|Gns|chr10|+|SE|121370296|121370418|121365175|121365358|121371143|121371203	0.057	ENSMUSG00000034707|Gns|chr10|+|SE|121370296|121370418|121365175|121365358|121371143|121371203|POS
ENSMUSG00000002028|Kmt2a|chr9|-|A5SS|44817604|44817786|44817705|44817786|44816594|44816659	0.057	ENSMUSG00000002028|Kmt2a|chr9|-|A5SS|44817604|44817786|44817705|44817786|44816594|44816659|POS
ENSMUSG00000092203|1110038B12Rik|chr17|-|SE|34951884|34951925|34950697|34950847|34952135|34952173	0.057	ENSMUSG00000092203|1110038B12Rik|chr17|-|SE|34951884|34951925|34950697|34950847|34952135|34952173|POS
ENSMUSG00000053907|Mat2a|chr6|-|RI|72432798|72435114|72432798|72434395|72434980|72435114	0.058	ENSMUSG00000053907|Mat2a|chr6|-|RI|72432798|72435114|72432798|72434395|72434980|72435114|POS
ENSMUSG00000003153|Slc2a3|chr6|-|RI|122737057|122739993|122737057|122737298|122739832|122739993	0.058	ENSMUSG00000003153|Slc2a3|chr6|-|RI|122737057|122739993|122737057|122737298|122739832|122739993|POS
ENSMUSG00000054611|Kdm2a|chr19|-|SE|4332440|4332485|4331185|4331269|4333642|4333919	0.058	ENSMUSG00000054611|Kdm2a|chr19|-|SE|4332440|4332485|4331185|4331269|4333642|4333919|POS
ENSMUSG00000026492|Tfb2m|chr1|-|SE|179544897|179544986|179542306|179542457|179545821|179546267	0.058	ENSMUSG00000026492|Tfb2m|chr1|-|SE|179544897|179544986|179542306|179542457|179545821|179546267|POS
ENSMUSG00000028931|Kcnab2|chr4|-|SE|152434781|152434823|152412816|152412860|152435804|152435937	0.058	ENSMUSG00000028931|Kcnab2|chr4|-|SE|152434781|152434823|152412816|152412860|152435804|152435937|POS
ENSMUSG00000024843|Chka|chr19|+|RI|3889879|3892213|3889879|3889988|3892106|3892213	0.058	ENSMUSG00000024843|Chka|chr19|+|RI|3889879|3892213|3889879|3889988|3892106|3892213|POS
ENSMUSG00000020843|Timm22|chr11|+|SE|76409641|76409838|76407142|76407442|76411126|76411199	0.058	ENSMUSG00000020843|Timm22|chr11|+|SE|76409641|76409838|76407142|76407442|76411126|76411199|POS
ENSMUSG00000015889|Lta4h|chr10|+|SE|93482249|93482332|93480690|93480786|93482961|93483001	0.058	ENSMUSG00000015889|Lta4h|chr10|+|SE|93482249|93482332|93480690|93480786|93482961|93483001|POS
ENSMUSG00000024283|Wac|chr18|+|SE|7910515|7910824|7905931|7906044|7916051|7916284	0.058	ENSMUSG00000024283|Wac|chr18|+|SE|7910515|7910824|7905931|7906044|7916051|7916284|POS
ENSMUSG00000005882|Uqcc1|chr2|-|RI|155910356|155911836|155910356|155910464|155911740|155911836	0.059	ENSMUSG00000005882|Uqcc1|chr2|-|RI|155910356|155911836|155910356|155910464|155911740|155911836|POS
ENSMUSG00000009585|Apobec3|chr15|+|RI|79905443|79906602|79905443|79905600|79906340|79906602	0.059	ENSMUSG00000009585|Apobec3|chr15|+|RI|79905443|79906602|79905443|79905600|79906340|79906602|POS
ENSMUSG00000029625|Cpsf4|chr5|+|A3SS|145178783|145178928|145178832|145178928|145177229|145177302	0.059	ENSMUSG00000029625|Cpsf4|chr5|+|A3SS|145178783|145178928|145178832|145178928|145177229|145177302|POS
ENSMUSG00000035047|Kri1|chr9|-|RI|21280163|21280489|21280163|21280259|21280362|21280489	0.059	ENSMUSG00000035047|Kri1|chr9|-|RI|21280163|21280489|21280163|21280259|21280362|21280489|POS
ENSMUSG00000021819|Zswim8|chr14|+|RI|20718759|20719225|20718759|20718918|20718996|20719225	0.059	ENSMUSG00000021819|Zswim8|chr14|+|RI|20718759|20719225|20718759|20718918|20718996|20719225|POS
ENSMUSG00000027615|Hps3|chr3|-|RI|20030313|20030805|20030313|20030409|20030558|20030805	0.059	ENSMUSG00000027615|Hps3|chr3|-|RI|20030313|20030805|20030313|20030409|20030558|20030805|POS
ENSMUSG00000031065|Cdk16|chrX|+|A3SS|20693906|20694171|20694037|20694171|20693323|20693531	0.059	ENSMUSG00000031065|Cdk16|chrX|+|A3SS|20693906|20694171|20694037|20694171|20693323|20693531|POS
ENSMUSG00000028644|Ermap|chr4|-|A5SS|119188701|119188943|119188858|119188943|119187629|119187719	0.059	ENSMUSG00000028644|Ermap|chr4|-|A5SS|119188701|119188943|119188858|119188943|119187629|119187719|POS
ENSMUSG00000032175|Tyk2|chr9|-|A3SS|21123976|21124209|21123976|21124140|21124410|21124558	0.059	ENSMUSG00000032175|Tyk2|chr9|-|A3SS|21123976|21124209|21123976|21124140|21124410|21124558|POS
ENSMUSG00000040359|Ufl1|chr4|-|RI|25269027|25270618|25269027|25269174|25270559|25270618	0.059	ENSMUSG00000040359|Ufl1|chr4|-|RI|25269027|25270618|25269027|25269174|25270559|25270618|POS
ENSMUSG00000029433|Diablo|chr5|-|RI|123517736|123518065|123517736|123517833|123517954|123518065	0.06	ENSMUSG00000029433|Diablo|chr5|-|RI|123517736|123518065|123517736|123517833|123517954|123518065|POS
ENSMUSG00000029192|Tbc1d14|chr5|-|RI|36507577|36508431|36507577|36507706|36508359|36508431	0.06	ENSMUSG00000029192|Tbc1d14|chr5|-|RI|36507577|36508431|36507577|36507706|36508359|36508431|POS
ENSMUSG00000031065|Cdk16|chrX|+|RI|20696017|20696467|20696017|20696141|20696346|20696467	0.06	ENSMUSG00000031065|Cdk16|chrX|+|RI|20696017|20696467|20696017|20696141|20696346|20696467|POS
ENSMUSG00000030104|Edem1|chr6|+|A5SS|108851209|108851502|108851209|108851283|108852489|108852586	0.06	ENSMUSG00000030104|Edem1|chr6|+|A5SS|108851209|108851502|108851209|108851283|108852489|108852586|POS
ENSMUSG00000020692|Nle1|chr11|-|A3SS|82902994|82903197|82902994|82903133|82904089|82904136	0.06	ENSMUSG00000020692|Nle1|chr11|-|A3SS|82902994|82903197|82902994|82903133|82904089|82904136|POS
ENSMUSG00000009687|Fxyd5|chr7|-|A3SS|31040182|31040272|31040182|31040221|31041396|31041457	0.06	ENSMUSG00000009687|Fxyd5|chr7|-|A3SS|31040182|31040272|31040182|31040221|31041396|31041457|POS
ENSMUSG00000021948|Prkcd|chr14|-|RI|30605439|30605901|30605439|30605569|30605815|30605901	0.061	ENSMUSG00000021948|Prkcd|chr14|-|RI|30605439|30605901|30605439|30605569|30605815|30605901|POS
ENSMUSG00000026360|Rgs2|chr1|-|RI|144002779|144003053|144002779|144002841|144002951|144003053	0.061	ENSMUSG00000026360|Rgs2|chr1|-|RI|144002779|144003053|144002779|144002841|144002951|144003053|POS
ENSMUSG00000025583|Rptor|chr11|+|RI|119894255|119895005|119894255|119894383|119894918|119895005	0.061	ENSMUSG00000025583|Rptor|chr11|+|RI|119894255|119895005|119894255|119894383|119894918|119895005|POS
ENSMUSG00000027610|Gss|chr2|-|RI|155578288|155578787|155578288|155578428|155578711|155578787	0.061	ENSMUSG00000027610|Gss|chr2|-|RI|155578288|155578787|155578288|155578428|155578711|155578787|POS
ENSMUSG00000022721|Trmt2a|chr16|+|RI|18251358|18251660|18251358|18251474|18251548|18251660	0.061	ENSMUSG00000022721|Trmt2a|chr16|+|RI|18251358|18251660|18251358|18251474|18251548|18251660|POS
ENSMUSG00000052142|Rasal3|chr17|-|RI|32392045|32392788|32392045|32392203|32392397|32392788	0.061	ENSMUSG00000052142|Rasal3|chr17|-|RI|32392045|32392788|32392045|32392203|32392397|32392788|POS
ENSMUSG00000025159|Mms19|chr19|-|RI|41945732|41947103|41945732|41945815|41946916|41947103	0.061	ENSMUSG00000025159|Mms19|chr19|-|RI|41945732|41947103|41945732|41945815|41946916|41947103|POS
ENSMUSG00000042055|Wdr11|chr7|+|RI|129630619|129631269|129630619|129630797|129631173|129631269	0.061	ENSMUSG00000042055|Wdr11|chr7|+|RI|129630619|129631269|129630619|129630797|129631173|129631269|POS
ENSMUSG00000027185|Nat10|chr2|-|RI|103734374|103734990|103734374|103734525|103734865|103734990	0.061	ENSMUSG00000027185|Nat10|chr2|-|RI|103734374|103734990|103734374|103734525|103734865|103734990|POS
ENSMUSG00000040044|Orc3|chr4|-|RI|34597307|34598756|34597307|34597441|34598607|34598756	0.062	ENSMUSG00000040044|Orc3|chr4|-|RI|34597307|34598756|34597307|34597441|34598607|34598756|POS
ENSMUSG00000070034|Sp110|chr1|-|RI|85579056|85579745|85579056|85579199|85579643|85579745	0.062	ENSMUSG00000070034|Sp110|chr1|-|RI|85579056|85579745|85579056|85579199|85579643|85579745|POS
ENSMUSG00000026219|Trip12|chr1|-|SE|84795689|84795815|84793524|84794327|84814822|84814969	0.062	ENSMUSG00000026219|Trip12|chr1|-|SE|84795689|84795815|84793524|84794327|84814822|84814969|POS
ENSMUSG00000034593|Myo5a|chr9|+|SE|75192383|75192464|75189899|75190000|75193938|75194100	0.062	ENSMUSG00000034593|Myo5a|chr9|+|SE|75192383|75192464|75189899|75190000|75193938|75194100|POS
ENSMUSG00000052384|Nrros|chr16|-|SE|32162237|32163397|32147552|32147673|32165379|32165476	0.062	ENSMUSG00000052384|Nrros|chr16|-|SE|32162237|32163397|32147552|32147673|32165379|32165476|POS
ENSMUSG00000040701|Ap1g2|chr14|-|RI|55103202|55103507|55103202|55103258|55103408|55103507	0.063	ENSMUSG00000040701|Ap1g2|chr14|-|RI|55103202|55103507|55103202|55103258|55103408|55103507|POS
ENSMUSG00000039354|Smarcal1|chr1|+|RI|72611294|72613024|72611294|72611435|72612808|72613024	0.063	ENSMUSG00000039354|Smarcal1|chr1|+|RI|72611294|72613024|72611294|72611435|72612808|72613024|POS
ENSMUSG00000007038|Neu1|chr17|+|RI|34932565|34934185|34932565|34932828|34934002|34934185	0.063	ENSMUSG00000007038|Neu1|chr17|+|RI|34932565|34934185|34932565|34932828|34934002|34934185|POS
ENSMUSG00000034518|Hmgxb4|chr8|+|RI|74999559|74999891|74999559|74999708|74999812|74999891	0.063	ENSMUSG00000034518|Hmgxb4|chr8|+|RI|74999559|74999891|74999559|74999708|74999812|74999891|POS
ENSMUSG00000023908|Pkmyt1|chr17|+|RI|23732336|23734316|23732336|23732824|23733822|23734316	0.063	ENSMUSG00000023908|Pkmyt1|chr17|+|RI|23732336|23734316|23732336|23732824|23733822|23734316|POS
ENSMUSG00000002804|Nudt14|chr12|-|RI|112938355|112938859|112938355|112938593|112938794|112938859	0.063	ENSMUSG00000002804|Nudt14|chr12|-|RI|112938355|112938859|112938355|112938593|112938794|112938859|POS
ENSMUSG00000019338|Zfp687|chr3|-|RI|95008584|95009238|95008584|95008917|95009075|95009238	0.063	ENSMUSG00000019338|Zfp687|chr3|-|RI|95008584|95009238|95008584|95008917|95009075|95009238|POS
ENSMUSG00000025245|Lztfl1|chr9|-|SE|123715299|123715424|123712429|123712624|123717525|123717528	0.063	ENSMUSG00000025245|Lztfl1|chr9|-|SE|123715299|123715424|123712429|123712624|123717525|123717528|POS
ENSMUSG00000048495|Tyw5|chr1|-|RI|57393349|57394091|57393349|57393487|57394046|57394091	0.064	ENSMUSG00000048495|Tyw5|chr1|-|RI|57393349|57394091|57393349|57393487|57394046|57394091|POS
ENSMUSG00000020792|Exoc7|chr11|-|SE|116297570|116297663|116295543|116295689|116300265|116300433	0.064	ENSMUSG00000020792|Exoc7|chr11|-|SE|116297570|116297663|116295543|116295689|116300265|116300433|POS
ENSMUSG00000029472|Anapc5|chr5|-|A3SS|122800450|122800608|122800450|122800593|122802129|122802219	0.065	ENSMUSG00000029472|Anapc5|chr5|-|A3SS|122800450|122800608|122800450|122800593|122802129|122802219|POS
ENSMUSG00000003778|Brd8|chr18|-|RI|34608417|34609949|34608417|34608627|34609804|34609949	0.065	ENSMUSG00000003778|Brd8|chr18|-|RI|34608417|34609949|34608417|34608627|34609804|34609949|POS
ENSMUSG00000030232|Aebp2|chr6|+|RI|140650755|140652826|140650755|140650782|140651315|140652826	0.065	ENSMUSG00000030232|Aebp2|chr6|+|RI|140650755|140652826|140650755|140650782|140651315|140652826|POS
ENSMUSG00000038828|Tmem214|chr5|+|RI|30872686|30873144|30872686|30872768|30873042|30873144	0.065	ENSMUSG00000038828|Tmem214|chr5|+|RI|30872686|30873144|30872686|30872768|30873042|30873144|POS
ENSMUSG00000006288|Ttc5|chr14|-|A3SS|50775290|50775450|50775290|50775382|50777261|50777412	0.065	ENSMUSG00000006288|Ttc5|chr14|-|A3SS|50775290|50775450|50775290|50775382|50777261|50777412|POS
ENSMUSG00000053841|Txlna|chr4|-|RI|129631279|129631710|129631279|129631354|129631590|129631710	0.065	ENSMUSG00000053841|Txlna|chr4|-|RI|129631279|129631710|129631279|129631354|129631590|129631710|POS
ENSMUSG00000003526|Prodh|chr16|-|RI|18077443|18077883|18077443|18077590|18077790|18077883	0.065	ENSMUSG00000003526|Prodh|chr16|-|RI|18077443|18077883|18077443|18077590|18077790|18077883|POS
ENSMUSG00000019951|Uhrf1bp1l|chr10|+|RI|89808517|89809778|89808517|89808660|89809627|89809778	0.066	ENSMUSG00000019951|Uhrf1bp1l|chr10|+|RI|89808517|89809778|89808517|89808660|89809627|89809778|POS
ENSMUSG00000003808|Farsa|chr8|+|RI|84867548|84867918|84867548|84867648|84867749|84867918	0.066	ENSMUSG00000003808|Farsa|chr8|+|RI|84867548|84867918|84867548|84867648|84867749|84867918|POS
ENSMUSG00000027845|Dclre1b|chr3|-|SE|103808071|103808237|103805933|103807576|103808899|103809202	0.066	ENSMUSG00000027845|Dclre1b|chr3|-|SE|103808071|103808237|103805933|103807576|103808899|103809202|POS
ENSMUSG00000035835|Plppr3|chr10|-|RI|79866834|79867307|79866834|79867030|79867171|79867307	0.066	ENSMUSG00000035835|Plppr3|chr10|-|RI|79866834|79867307|79866834|79867030|79867171|79867307|POS
ENSMUSG00000046679|C87436|chr6|+|SE|86454259|86454313|86453608|86453713|86457815|86457923	0.066	ENSMUSG00000046679|C87436|chr6|+|SE|86454259|86454313|86453608|86453713|86457815|86457923|POS
ENSMUSG00000028999|Rint1|chr5|+|RI|23809783|23810194|23809783|23809894|23809968|23810194	0.067	ENSMUSG00000028999|Rint1|chr5|+|RI|23809783|23810194|23809783|23809894|23809968|23810194|POS
ENSMUSG00000030515|Tarsl2|chr7|+|SE|65688878|65688951|65686437|65686542|65689967|65690082	0.067	ENSMUSG00000030515|Tarsl2|chr7|+|SE|65688878|65688951|65686437|65686542|65689967|65690082|POS
ENSMUSG00000021134|Srsf5|chr12|+|RI|80947795|80949168|80947795|80947865|80949094|80949168	0.067	ENSMUSG00000021134|Srsf5|chr12|+|RI|80947795|80949168|80947795|80947865|80949094|80949168|POS
ENSMUSG00000038775|Vill|chr9|+|RI|119067410|119068456|119067410|119067556|119068311|119068456	0.067	ENSMUSG00000038775|Vill|chr9|+|RI|119067410|119068456|119067410|119067556|119068311|119068456|POS
ENSMUSG00000075703|Selenoi|chr5|+|SE|30252709|30252784|30248411|30248520|30256077|30256340	0.067	ENSMUSG00000075703|Selenoi|chr5|+|SE|30252709|30252784|30248411|30248520|30256077|30256340|POS
ENSMUSG00000060470|Adgrg3|chr8|+|SE|95036206|95036328|95035809|95035944|95036440|95036480	0.067	ENSMUSG00000060470|Adgrg3|chr8|+|SE|95036206|95036328|95035809|95035944|95036440|95036480|POS
ENSMUSG00000026873|Phf19|chr2|-|RI|34911163|34911802|34911163|34911245|34911616|34911802	0.067	ENSMUSG00000026873|Phf19|chr2|-|RI|34911163|34911802|34911163|34911245|34911616|34911802|POS
ENSMUSG00000031629|Cenpu|chr8|+|SE|46555454|46555560|46554014|46554063|46556081|46556193	0.068	ENSMUSG00000031629|Cenpu|chr8|+|SE|46555454|46555560|46554014|46554063|46556081|46556193|POS
ENSMUSG00000032322|Pstpip1|chr9|+|RI|56123747|56124673|56123747|56123793|56124593|56124673	0.068	ENSMUSG00000032322|Pstpip1|chr9|+|RI|56123747|56124673|56123747|56123793|56124593|56124673|POS
ENSMUSG00000019843|Fyn|chr10|+|MXE|39529436|39529601|39529918|39530074|39526780|39526930|39532015|39532195	0.068	ENSMUSG00000019843|Fyn|chr10|+|MXE|39529436|39529601|39529918|39530074|39526780|39526930|39532015|39532195|POS
ENSMUSG00000085385|Snhg17|chr2|-|RI|158359181|158360599|158359181|158359432|158360458|158360599	0.068	ENSMUSG00000085385|Snhg17|chr2|-|RI|158359181|158360599|158359181|158359432|158360458|158360599|POS
ENSMUSG00000040528|Milr1|chr11|+|MXE|106757702|106757809|106761182|106761296|106754781|106755051|106763855|106763948	0.069	ENSMUSG00000040528|Milr1|chr11|+|MXE|106757702|106757809|106761182|106761296|106754781|106755051|106763855|106763948|POS
ENSMUSG00000022401|Xpnpep3|chr15|+|SE|81415846|81415994|81414431|81414548|81427275|81427538	0.069	ENSMUSG00000022401|Xpnpep3|chr15|+|SE|81415846|81415994|81414431|81414548|81427275|81427538|POS
ENSMUSG00000112023|Lilr4b|chr10|+|RI|51481139|51481869|51481139|51481424|51481566|51481869	0.07	ENSMUSG00000112023|Lilr4b|chr10|+|RI|51481139|51481869|51481139|51481424|51481566|51481869|POS
ENSMUSG00000007850|Hnrnph1|chr11|+|RI|50379820|50382715|50379820|50379964|50382536|50382715	0.071	ENSMUSG00000007850|Hnrnph1|chr11|+|RI|50379820|50382715|50379820|50379964|50382536|50382715|POS
ENSMUSG00000038975|Rabggtb|chr3|-|RI|153910260|153910888|153910260|153910366|153910690|153910888	0.071	ENSMUSG00000038975|Rabggtb|chr3|-|RI|153910260|153910888|153910260|153910366|153910690|153910888|POS
ENSMUSG00000021275|Tecpr2|chr12|+|A3SS|110931289|110931732|110931399|110931732|110929031|110929164	0.071	ENSMUSG00000021275|Tecpr2|chr12|+|A3SS|110931289|110931732|110931399|110931732|110929031|110929164|POS
ENSMUSG00000022721|Trmt2a|chr16|+|RI|18250819|18251660|18250819|18251001|18251548|18251660	0.071	ENSMUSG00000022721|Trmt2a|chr16|+|RI|18250819|18251660|18250819|18251001|18251548|18251660|POS
ENSMUSG00000006169|Clint1|chr11|+|A3SS|45907839|45908044|45907893|45908044|45906180|45906467	0.072	ENSMUSG00000006169|Clint1|chr11|+|A3SS|45907839|45908044|45907893|45908044|45906180|45906467|POS
ENSMUSG00000005262|Ufd1|chr16|+|RI|18826254|18827106|18826254|18826302|18827017|18827106	0.072	ENSMUSG00000005262|Ufd1|chr16|+|RI|18826254|18827106|18826254|18826302|18827017|18827106|POS
ENSMUSG00000004567|Mcoln1|chr8|+|RI|3508683|3509235|3508683|3508780|3509135|3509235	0.072	ENSMUSG00000004567|Mcoln1|chr8|+|RI|3508683|3509235|3508683|3508780|3509135|3509235|POS
ENSMUSG00000035711|Dok3|chr13|-|RI|55527331|55528554|55527331|55527637|55528448|55528554	0.072	ENSMUSG00000035711|Dok3|chr13|-|RI|55527331|55528554|55527331|55527637|55528448|55528554|POS
ENSMUSG00000026987|Baz2b|chr2|-|RI|59920294|59922217|59920294|59920538|59922142|59922217	0.073	ENSMUSG00000026987|Baz2b|chr2|-|RI|59920294|59922217|59920294|59920538|59922142|59922217|POS
ENSMUSG00000031389|Arhgap4|chrX|-|RI|73899844|73900469|73899844|73899872|73900098|73900469	0.073	ENSMUSG00000031389|Arhgap4|chrX|-|RI|73899844|73900469|73899844|73899872|73900098|73900469|POS
ENSMUSG00000056919|Cep162|chr9|-|RI|87238353|87239933|87238353|87238384|87239814|87239933	0.073	ENSMUSG00000056919|Cep162|chr9|-|RI|87238353|87239933|87238353|87238384|87239814|87239933|POS
ENSMUSG00000068874|Selenbp1|chr3|+|RI|94937207|94938075|94937207|94937393|94937954|94938075	0.073	ENSMUSG00000068874|Selenbp1|chr3|+|RI|94937207|94938075|94937207|94937393|94937954|94938075|POS
ENSMUSG00000003031|Cdkn1b|chr6|+|RI|134921955|134925513|134921955|134922083|134924242|134925513	0.073	ENSMUSG00000003031|Cdkn1b|chr6|+|RI|134921955|134925513|134921955|134922083|134924242|134925513|POS
ENSMUSG00000000826|Dnajc5|chr2|+|SE|181521234|181521287|181520550|181520697|181546370|181546488	0.073	ENSMUSG00000000826|Dnajc5|chr2|+|SE|181521234|181521287|181520550|181520697|181546370|181546488|POS
ENSMUSG00000033540|Idua|chr5|+|A5SS|108680860|108681204|108680860|108681077|108681379|108681592	0.073	ENSMUSG00000033540|Idua|chr5|+|A5SS|108680860|108681204|108680860|108681077|108681379|108681592|POS
ENSMUSG00000004319|Clcn3|chr8|-|RI|60922789|60927418|60922789|60923188|60927231|60927418	0.074	ENSMUSG00000004319|Clcn3|chr8|-|RI|60922789|60927418|60922789|60923188|60927231|60927418|POS
ENSMUSG00000025494|Sigirr|chr7|-|RI|141092977|141093330|141092977|141093118|141093199|141093330	0.074	ENSMUSG00000025494|Sigirr|chr7|-|RI|141092977|141093330|141092977|141093118|141093199|141093330|POS
ENSMUSG00000038425|Poli|chr18|-|A5SS|70524730|70525528|70525375|70525528|70523162|70523399	0.074	ENSMUSG00000038425|Poli|chr18|-|A5SS|70524730|70525528|70525375|70525528|70523162|70523399|POS
ENSMUSG00000034893|Cog3|chr14|-|RI|75707089|75708049|75707089|75707188|75707921|75708049	0.074	ENSMUSG00000034893|Cog3|chr14|-|RI|75707089|75708049|75707089|75707188|75707921|75708049|POS
ENSMUSG00000029625|Cpsf4|chr5|+|A3SS|145178783|145178928|145178835|145178928|145177229|145177302	0.074	ENSMUSG00000029625|Cpsf4|chr5|+|A3SS|145178783|145178928|145178835|145178928|145177229|145177302|POS
ENSMUSG00000052934|Fbxo31|chr8|-|SE|121564637|121564724|121560385|121560462|121566274|121566346	0.074	ENSMUSG00000052934|Fbxo31|chr8|-|SE|121564637|121564724|121560385|121560462|121566274|121566346|POS
ENSMUSG00000032580|Rbm5|chr9|-|SE|107755852|107755913|107754422|107754488|107756908|107756992	0.074	ENSMUSG00000032580|Rbm5|chr9|-|SE|107755852|107755913|107754422|107754488|107756908|107756992|POS
ENSMUSG00000063870|Chd4|chr6|+|A3SS|125102431|125102610|125102470|125102610|125102162|125102298	0.075	ENSMUSG00000063870|Chd4|chr6|+|A3SS|125102431|125102610|125102470|125102610|125102162|125102298|POS
ENSMUSG00000062906|Hdac10|chr15|-|RI|89127593|89128018|89127593|89127691|89127921|89128018	0.076	ENSMUSG00000062906|Hdac10|chr15|-|RI|89127593|89128018|89127593|89127691|89127921|89128018|POS
ENSMUSG00000061046|Haghl|chr17|-|RI|25783502|25783886|25783502|25783582|25783784|25783886	0.076	ENSMUSG00000061046|Haghl|chr17|-|RI|25783502|25783886|25783502|25783582|25783784|25783886|POS
ENSMUSG00000032525|Nktr|chr9|+|A3SS|121742564|121742787|121742639|121742787|121741597|121741743	0.076	ENSMUSG00000032525|Nktr|chr9|+|A3SS|121742564|121742787|121742639|121742787|121741597|121741743|POS
ENSMUSG00000028277|Ube2j1|chr4|+|SE|33045079|33045199|33043856|33043986|33049681|33052363	0.076	ENSMUSG00000028277|Ube2j1|chr4|+|SE|33045079|33045199|33043856|33043986|33049681|33052363|POS
ENSMUSG00000021282|Eif5|chr12|+|RI|111539407|111540302|111539407|111539687|111540129|111540302	0.077	ENSMUSG00000021282|Eif5|chr12|+|RI|111539407|111540302|111539407|111539687|111540129|111540302|POS
ENSMUSG00000025792|Slc25a10|chr11|+|RI|120497013|120497461|120497013|120497106|120497383|120497461	0.077	ENSMUSG00000025792|Slc25a10|chr11|+|RI|120497013|120497461|120497013|120497106|120497383|120497461|POS
ENSMUSG00000029823|Luc7l2|chr6|+|SE|38598784|38598814|38593377|38593469|38603276|38603468	0.077	ENSMUSG00000029823|Luc7l2|chr6|+|SE|38598784|38598814|38593377|38593469|38603276|38603468|POS
ENSMUSG00000035929|H2-Q4|chr17|+|RI|35379819|35380636|35379819|35380173|35380360|35380636	0.077	ENSMUSG00000035929|H2-Q4|chr17|+|RI|35379819|35380636|35379819|35380173|35380360|35380636|POS
ENSMUSG00000001065|Zfp276|chr8|+|A3SS|123267504|123267699|123267599|123267699|123265313|123265431	0.077	ENSMUSG00000001065|Zfp276|chr8|+|A3SS|123267504|123267699|123267599|123267699|123265313|123265431|POS
ENSMUSG00000041130|Zfp598|chr17|+|RI|24677834|24678713|24677834|24678052|24678595|24678713	0.078	ENSMUSG00000041130|Zfp598|chr17|+|RI|24677834|24678713|24677834|24678052|24678595|24678713|POS
ENSMUSG00000025280|Polr3a|chr14|-|RI|24452192|24452675|24452192|24452324|24452510|24452675	0.078	ENSMUSG00000025280|Polr3a|chr14|-|RI|24452192|24452675|24452192|24452324|24452510|24452675|POS
ENSMUSG00000033799|Fam208b|chr13|-|RI|3599938|3600334|3599938|3600062|3600191|3600334	0.079	ENSMUSG00000033799|Fam208b|chr13|-|RI|3599938|3600334|3599938|3600062|3600191|3600334|POS
ENSMUSG00000010110|Stx5a|chr19|+|RI|8743079|8743423|8743079|8743135|8743352|8743423	0.079	ENSMUSG00000010110|Stx5a|chr19|+|RI|8743079|8743423|8743079|8743135|8743352|8743423|POS
ENSMUSG00000014856|Tmem208|chr8|+|RI|105328321|105328692|105328321|105328458|105328607|105328692	0.079	ENSMUSG00000014856|Tmem208|chr8|+|RI|105328321|105328692|105328321|105328458|105328607|105328692|POS
ENSMUSG00000062078|Qk|chr17|-|A3SS|10213358|10214194|10213358|10213433|10216159|10216459	0.079	ENSMUSG00000062078|Qk|chr17|-|A3SS|10213358|10214194|10213358|10213433|10216159|10216459|POS
ENSMUSG00000028759|Hp1bp3|chr4|+|SE|138221525|138221723|138216295|138216740|138222088|138222188	0.079	ENSMUSG00000028759|Hp1bp3|chr4|+|SE|138221525|138221723|138216295|138216740|138222088|138222188|POS
ENSMUSG00000026767|Mindy3|chr2|-|SE|12401024|12401076|12399658|12400137|12403997|12404166	0.08	ENSMUSG00000026767|Mindy3|chr2|-|SE|12401024|12401076|12399658|12400137|12403997|12404166|POS
ENSMUSG00000039483|Asb6|chr2|-|RI|30824640|30825560|30824640|30824727|30825451|30825560	0.081	ENSMUSG00000039483|Asb6|chr2|-|RI|30824640|30825560|30824640|30824727|30825451|30825560|POS
ENSMUSG00000000884|Gnb1l|chr16|+|SE|18548934|18549059|18548092|18548191|18552366|18552582	0.081	ENSMUSG00000000884|Gnb1l|chr16|+|SE|18548934|18549059|18548092|18548191|18552366|18552582|POS
ENSMUSG00000022841|Ap2m1|chr16|+|SE|20540807|20540813|20540332|20540415|20540974|20541110	0.081	ENSMUSG00000022841|Ap2m1|chr16|+|SE|20540807|20540813|20540332|20540415|20540974|20541110|POS
ENSMUSG00000058291|Zfp68|chr5|-|A3SS|138616469|138616614|138616469|138616565|138617054|138617167	0.081	ENSMUSG00000058291|Zfp68|chr5|-|A3SS|138616469|138616614|138616469|138616565|138617054|138617167|POS
ENSMUSG00000030035|Wbp1|chr6|-|RI|83120184|83120876|83120184|83120287|83120771|83120876	0.081	ENSMUSG00000030035|Wbp1|chr6|-|RI|83120184|83120876|83120184|83120287|83120771|83120876|POS
ENSMUSG00000021870|Slmap|chr14|-|SE|26459903|26459954|26442574|26442634|26460041|26460185	0.082	ENSMUSG00000021870|Slmap|chr14|-|SE|26459903|26459954|26442574|26442634|26460041|26460185|POS
ENSMUSG00000040446|Rprd1a|chr18|-|RI|24507104|24508091|24507104|24507231|24507993|24508091	0.082	ENSMUSG00000040446|Rprd1a|chr18|-|RI|24507104|24508091|24507104|24507231|24507993|24508091|POS
ENSMUSG00000032596|Uba7|chr9|+|RI|107975796|107976189|107975796|107975965|107976054|107976189	0.083	ENSMUSG00000032596|Uba7|chr9|+|RI|107975796|107976189|107975796|107975965|107976054|107976189|POS
ENSMUSG00000058440|Nrf1|chr6|+|SE|30090268|30090304|30089894|30090146|30095339|30095346	0.083	ENSMUSG00000058440|Nrf1|chr6|+|SE|30090268|30090304|30089894|30090146|30095339|30095346|POS
ENSMUSG00000005506|Celf1|chr2|+|RI|91013237|91019497|91013237|91013402|91016565|91019497	0.084	ENSMUSG00000005506|Celf1|chr2|+|RI|91013237|91019497|91013237|91013402|91016565|91019497|POS
ENSMUSG00000040528|Milr1|chr11|+|SE|106757702|106757814|106754781|106755051|106761182|106761296	0.084	ENSMUSG00000040528|Milr1|chr11|+|SE|106757702|106757814|106754781|106755051|106761182|106761296|POS
ENSMUSG00000025575|Cant1|chr11|-|A3SS|118417573|118417806|118417573|118417654|118418929|118419023	0.084	ENSMUSG00000025575|Cant1|chr11|-|A3SS|118417573|118417806|118417573|118417654|118418929|118419023|POS
ENSMUSG00000039176|Polg|chr7|-|RI|79454038|79454711|79454038|79454174|79454593|79454711	0.084	ENSMUSG00000039176|Polg|chr7|-|RI|79454038|79454711|79454038|79454174|79454593|79454711|POS
ENSMUSG00000032469|Dbr1|chr9|+|SE|99578440|99578521|99576575|99576700|99579356|99579442	0.084	ENSMUSG00000032469|Dbr1|chr9|+|SE|99578440|99578521|99576575|99576700|99579356|99579442|POS
ENSMUSG00000045427|Hnrnph2|chrX|+|SE|134602917|134602962|134602691|134602762|134604854|134606384	0.085	ENSMUSG00000045427|Hnrnph2|chrX|+|SE|134602917|134602962|134602691|134602762|134604854|134606384|POS
ENSMUSG00000029625|Cpsf4|chr5|+|RI|145177229|145178928|145177229|145177302|145178832|145178928	0.085	ENSMUSG00000029625|Cpsf4|chr5|+|RI|145177229|145178928|145177229|145177302|145178832|145178928|POS
ENSMUSG00000018340|Anxa6|chr11|-|SE|54987050|54987068|54986121|54986215|54991390|54991444	0.085	ENSMUSG00000018340|Anxa6|chr11|-|SE|54987050|54987068|54986121|54986215|54991390|54991444|POS
ENSMUSG00000011257|Pabpc4|chr4|+|SE|123295749|123295836|123295201|123295321|123295929|123296057	0.085	ENSMUSG00000011257|Pabpc4|chr4|+|SE|123295749|123295836|123295201|123295321|123295929|123296057|POS
ENSMUSG00000029767|Calu|chr6|+|SE|29361293|29361487|29356470|29356697|29361559|29361753	0.085	ENSMUSG00000029767|Calu|chr6|+|SE|29361293|29361487|29356470|29356697|29361559|29361753|POS
ENSMUSG00000056211|R3hdm1|chr1|+|RI|128181985|128184654|128181985|128182212|128184399|128184654	0.085	ENSMUSG00000056211|R3hdm1|chr1|+|RI|128181985|128184654|128181985|128182212|128184399|128184654|POS
ENSMUSG00000038346|Zfp384|chr6|+|RI|125024032|125024552|125024032|125024270|125024413|125024552	0.085	ENSMUSG00000038346|Zfp384|chr6|+|RI|125024032|125024552|125024032|125024270|125024413|125024552|POS
ENSMUSG00000042185|Nfrkb|chr9|+|RI|31397719|31398644|31397719|31397793|31398559|31398644	0.086	ENSMUSG00000042185|Nfrkb|chr9|+|RI|31397719|31398644|31397719|31397793|31398559|31398644|POS
ENSMUSG00000029472|Anapc5|chr5|-|A3SS|122800450|122800632|122800450|122800593|122802129|122802219	0.086	ENSMUSG00000029472|Anapc5|chr5|-|A3SS|122800450|122800632|122800450|122800593|122802129|122802219|POS
ENSMUSG00000038241|Cep250|chr2|+|RI|155988311|155989620|155988311|155988432|155989498|155989620	0.086	ENSMUSG00000038241|Cep250|chr2|+|RI|155988311|155989620|155988311|155988432|155989498|155989620|POS
ENSMUSG00000024426|Atat1|chr17|-|RI|35908562|35908966|35908562|35908664|35908852|35908966	0.087	ENSMUSG00000024426|Atat1|chr17|-|RI|35908562|35908966|35908562|35908664|35908852|35908966|POS
ENSMUSG00000004865|Srpk1|chr17|-|RI|28599470|28600456|28599470|28599869|28600242|28600456	0.087	ENSMUSG00000004865|Srpk1|chr17|-|RI|28599470|28600456|28599470|28599869|28600242|28600456|POS
ENSMUSG00000001750|Tcirg1|chr19|-|RI|3903045|3903428|3903045|3903172|3903339|3903428	0.087	ENSMUSG00000001750|Tcirg1|chr19|-|RI|3903045|3903428|3903045|3903172|3903339|3903428|POS
ENSMUSG00000029767|Calu|chr6|+|MXE|29361293|29361487|29361559|29361753|29356470|29356697|29366039|29366206	0.087	ENSMUSG00000029767|Calu|chr6|+|MXE|29361293|29361487|29361559|29361753|29356470|29356697|29366039|29366206|POS
ENSMUSG00000036281|Snapc4|chr2|-|RI|26372730|26373080|26372730|26372825|26372973|26373080	0.088	ENSMUSG00000036281|Snapc4|chr2|-|RI|26372730|26373080|26372730|26372825|26372973|26373080|POS
ENSMUSG00000029283|Cdc7|chr5|+|RI|106974600|106975660|106974600|106974696|106975484|106975660	0.088	ENSMUSG00000029283|Cdc7|chr5|+|RI|106974600|106975660|106974600|106974696|106975484|106975660|POS
ENSMUSG00000075415|Fnbp1|chr2|-|A3SS|31052984|31053167|31052984|31053080|31054023|31054218	0.088	ENSMUSG00000075415|Fnbp1|chr2|-|A3SS|31052984|31053167|31052984|31053080|31054023|31054218|POS
ENSMUSG00000057738|Sptan1|chr2|+|SE|30001099|30001159|29999913|30000062|30002230|30002429	0.088	ENSMUSG00000057738|Sptan1|chr2|+|SE|30001099|30001159|29999913|30000062|30002230|30002429|POS
ENSMUSG00000020792|Exoc7|chr11|-|SE|116296729|116296798|116295681|116295689|116300265|116300433	0.089	ENSMUSG00000020792|Exoc7|chr11|-|SE|116296729|116296798|116295681|116295689|116300265|116300433|POS
ENSMUSG00000025245|Lztfl1|chr9|-|SE|123715299|123715420|123712429|123712624|123717525|123717553	0.089	ENSMUSG00000025245|Lztfl1|chr9|-|SE|123715299|123715420|123712429|123712624|123717525|123717553|POS
ENSMUSG00000034602|Mon2|chr10|-|SE|123009912|123009930|123009502|123009631|123010493|123010637	0.089	ENSMUSG00000034602|Mon2|chr10|-|SE|123009912|123009930|123009502|123009631|123010493|123010637|POS
ENSMUSG00000021431|Snrnp48|chr13|+|RI|38217373|38220776|38217373|38217495|38220687|38220776	0.089	ENSMUSG00000021431|Snrnp48|chr13|+|RI|38217373|38220776|38217373|38217495|38220687|38220776|POS
ENSMUSG00000025507|Pidd1|chr7|-|RI|141439077|141439491|141439077|141439277|141439377|141439491	0.089	ENSMUSG00000025507|Pidd1|chr7|-|RI|141439077|141439491|141439077|141439277|141439377|141439491|POS
ENSMUSG00000022983|Scaf4|chr16|-|RI|90242526|90242958|90242526|90242652|90242871|90242958	0.09	ENSMUSG00000022983|Scaf4|chr16|-|RI|90242526|90242958|90242526|90242652|90242871|90242958|POS
ENSMUSG00000039254|Pomt1|chr2|+|RI|32241652|32243004|32241652|32241799|32242892|32243004	0.09	ENSMUSG00000039254|Pomt1|chr2|+|RI|32241652|32243004|32241652|32241799|32242892|32243004|POS
ENSMUSG00000067369|Trmt2b|chrX|-|SE|134270509|134270585|134267330|134267561|134276845|134276920	0.09	ENSMUSG00000067369|Trmt2b|chrX|-|SE|134270509|134270585|134267330|134267561|134276845|134276920|POS
ENSMUSG00000052337|Immt|chr6|+|SE|71853172|71853268|71852729|71852867|71856911|71857048	0.091	ENSMUSG00000052337|Immt|chr6|+|SE|71853172|71853268|71852729|71852867|71856911|71857048|POS
ENSMUSG00000015291|Gdi1|chrX|+|RI|74307671|74308261|74307671|74307870|74308129|74308261	0.091	ENSMUSG00000015291|Gdi1|chrX|+|RI|74307671|74308261|74307671|74307870|74308129|74308261|POS
ENSMUSG00000033191|Tie1|chr4|-|RI|118478861|118479903|118478861|118479152|118479612|118479903	0.091	ENSMUSG00000033191|Tie1|chr4|-|RI|118478861|118479903|118478861|118479152|118479612|118479903|POS
ENSMUSG00000039738|Slx4|chr16|-|SE|3982978|3983242|3981584|3981687|3984990|3987181	0.091	ENSMUSG00000039738|Slx4|chr16|-|SE|3982978|3983242|3981584|3981687|3984990|3987181|POS
ENSMUSG00000000838|Fmr1|chrX|+|A3SS|68712230|68712413|68712305|68712413|68710583|68710779	0.092	ENSMUSG00000000838|Fmr1|chrX|+|A3SS|68712230|68712413|68712305|68712413|68710583|68710779|POS
ENSMUSG00000050323|Ndufaf6|chr4|-|SE|11053431|11053488|11051044|11051225|11059011|11059113	0.092	ENSMUSG00000050323|Ndufaf6|chr4|-|SE|11053431|11053488|11051044|11051225|11059011|11059113|POS
ENSMUSG00000074064|Mlycd|chr8|+|RI|119401480|119402590|119401480|119401593|119402433|119402590	0.092	ENSMUSG00000074064|Mlycd|chr8|+|RI|119401480|119402590|119401480|119401593|119402433|119402590|POS
ENSMUSG00000022822|Abcc5|chr16|-|A3SS|20392450|20392922|20392450|20392807|20396014|20396122	0.093	ENSMUSG00000022822|Abcc5|chr16|-|A3SS|20392450|20392922|20392450|20392807|20396014|20396122|POS
ENSMUSG00000026034|Clk1|chr1|-|RI|58419666|58421308|58419666|58419733|58421082|58421308	0.093	ENSMUSG00000026034|Clk1|chr1|-|RI|58419666|58421308|58419666|58419733|58421082|58421308|POS
ENSMUSG00000048495|Tyw5|chr1|-|SE|57393669|57393694|57393349|57393487|57394046|57394091	0.093	ENSMUSG00000048495|Tyw5|chr1|-|SE|57393669|57393694|57393349|57393487|57394046|57394091|POS
ENSMUSG00000019907|Ppp1r12a|chr10|+|RI|108261244|108262431|108261244|108261416|108262309|108262431	0.094	ENSMUSG00000019907|Ppp1r12a|chr10|+|RI|108261244|108262431|108261244|108261416|108262309|108262431|POS
ENSMUSG00000042272|Sestd1|chr2|-|RI|77198288|77199060|77198288|77198403|77198865|77199060	0.094	ENSMUSG00000042272|Sestd1|chr2|-|RI|77198288|77199060|77198288|77198403|77198865|77199060|POS
ENSMUSG00000001750|Tcirg1|chr19|-|RI|3901890|3902556|3901890|3902035|3902343|3902556	0.094	ENSMUSG00000001750|Tcirg1|chr19|-|RI|3901890|3902556|3901890|3902035|3902343|3902556|POS
ENSMUSG00000019214|Chtf18|chr17|-|RI|25722843|25723313|25722843|25722942|25723219|25723313	0.094	ENSMUSG00000019214|Chtf18|chr17|-|RI|25722843|25723313|25722843|25722942|25723219|25723313|POS
ENSMUSG00000029625|Cpsf4|chr5|+|RI|145177229|145178928|145177229|145177302|145178835|145178928	0.095	ENSMUSG00000029625|Cpsf4|chr5|+|RI|145177229|145178928|145177229|145177302|145178835|145178928|POS
ENSMUSG00000078122|F630028O10Rik|chrX|+|RI|96240412|96243636|96240412|96240513|96241037|96243636	0.095	ENSMUSG00000078122|F630028O10Rik|chrX|+|RI|96240412|96243636|96240412|96240513|96241037|96243636|POS
ENSMUSG00000022617|Chkb|chr15|-|RI|89428410|89428827|89428410|89428544|89428713|89428827	0.096	ENSMUSG00000022617|Chkb|chr15|-|RI|89428410|89428827|89428410|89428544|89428713|89428827|POS
ENSMUSG00000023903|Mmp25|chr17|-|RI|23639752|23640274|23639752|23640042|23640138|23640274	0.096	ENSMUSG00000023903|Mmp25|chr17|-|RI|23639752|23640274|23639752|23640042|23640138|23640274|POS
ENSMUSG00000030815|Phkg2|chr7|+|RI|127577534|127578029|127577534|127577710|127577974|127578029	0.097	ENSMUSG00000030815|Phkg2|chr7|+|RI|127577534|127578029|127577534|127577710|127577974|127578029|POS
ENSMUSG00000031508|Ankrd10|chr8|-|RI|11611582|11615910|11611582|11612947|11615814|11615910	0.097	ENSMUSG00000031508|Ankrd10|chr8|-|RI|11611582|11615910|11611582|11612947|11615814|11615910|POS
ENSMUSG00000029328|Hnrnpdl|chr5|-|SE|100035634|100035739|100034726|100034984|100036103|100036195	0.097	ENSMUSG00000029328|Hnrnpdl|chr5|-|SE|100035634|100035739|100034726|100034984|100036103|100036195|POS
ENSMUSG00000038671|Arfrp1|chr2|-|RI|181364013|181364398|181364013|181364096|181364310|181364398	0.098	ENSMUSG00000038671|Arfrp1|chr2|-|RI|181364013|181364398|181364013|181364096|181364310|181364398|POS
ENSMUSG00000028467|Gba2|chr4|-|RI|43570036|43570448|43570036|43570190|43570345|43570448	0.098	ENSMUSG00000028467|Gba2|chr4|-|RI|43570036|43570448|43570036|43570190|43570345|43570448|POS
ENSMUSG00000042328|Hps4|chr5|+|RI|112369454|112370744|112369454|112369551|112369945|112370744	0.098	ENSMUSG00000042328|Hps4|chr5|+|RI|112369454|112370744|112369454|112369551|112369945|112370744|POS
ENSMUSG00000041975|Mettl8|chr2|-|A3SS|70981854|70982195|70981854|70981967|70993483|70993575	0.098	ENSMUSG00000041975|Mettl8|chr2|-|A3SS|70981854|70982195|70981854|70981967|70993483|70993575|POS
ENSMUSG00000022884|Eif4a2|chr16|+|SE|23112350|23112457|23111816|23111896|23113166|23113184	0.098	ENSMUSG00000022884|Eif4a2|chr16|+|SE|23112350|23112457|23111816|23111896|23113166|23113184|POS
ENSMUSG00000000826|Dnajc5|chr2|+|SE|181548925|181549000|181548669|181548841|181549272|181552249	0.098	ENSMUSG00000000826|Dnajc5|chr2|+|SE|181548925|181549000|181548669|181548841|181549272|181552249|POS
ENSMUSG00000060601|Nr1h2|chr7|-|A3SS|44551954|44552343|44551954|44552236|44552506|44552620	0.099	ENSMUSG00000060601|Nr1h2|chr7|-|A3SS|44551954|44552343|44551954|44552236|44552506|44552620|POS
ENSMUSG00000032177|Pde4a|chr9|+|RI|21191326|21192431|21191326|21191518|21192394|21192431	0.099	ENSMUSG00000032177|Pde4a|chr9|+|RI|21191326|21192431|21191326|21191518|21192394|21192431|POS
ENSMUSG00000039205|Ciz1|chr2|+|RI|32370863|32371408|32370863|32371113|32371248|32371408	0.099	ENSMUSG00000039205|Ciz1|chr2|+|RI|32370863|32371408|32370863|32371113|32371248|32371408|POS
ENSMUSG00000029478|Ncor2|chr5|-|SE|125019959|125020046|125018810|125018990|125022870|125022924	0.099	ENSMUSG00000029478|Ncor2|chr5|-|SE|125019959|125020046|125018810|125018990|125022870|125022924|POS
ENSMUSG00000039262|Prrc2b|chr2|+|SE|32212886|32214947|32212074|32212291|32216045|32216233	0.099	ENSMUSG00000039262|Prrc2b|chr2|+|SE|32212886|32214947|32212074|32212291|32216045|32216233|POS
ENSMUSG00000021916|Glt8d1|chr14|+|RI|31009734|31010165|31009734|31009852|31010080|31010165	0.099	ENSMUSG00000021916|Glt8d1|chr14|+|RI|31009734|31010165|31009734|31009852|31010080|31010165|POS
ENSMUSG00000029071|Dvl1|chr4|+|RI|155854565|155855025|155854565|155854800|155854885|155855025	0.1	ENSMUSG00000029071|Dvl1|chr4|+|RI|155854565|155855025|155854565|155854800|155854885|155855025|POS
ENSMUSG00000060601|Nr1h2|chr7|-|A3SS|44551954|44552343|44551954|44552245|44552506|44552620	0.1	ENSMUSG00000060601|Nr1h2|chr7|-|A3SS|44551954|44552343|44551954|44552245|44552506|44552620|POS
ENSMUSG00000058503|Fam133b|chr5|+|RI|3558660|3559159|3558660|3558693|3559096|3559159	0.101	ENSMUSG00000058503|Fam133b|chr5|+|RI|3558660|3559159|3558660|3558693|3559096|3559159|POS
ENSMUSG00000038271|Iffo1|chr6|+|RI|125153041|125153502|125153041|125153162|125153406|125153502	0.101	ENSMUSG00000038271|Iffo1|chr6|+|RI|125153041|125153502|125153041|125153162|125153406|125153502|POS
ENSMUSG00000051517|Arhgef39|chr4|-|RI|43498895|43499337|43498895|43499016|43499242|43499337	0.102	ENSMUSG00000051517|Arhgef39|chr4|-|RI|43498895|43499337|43498895|43499016|43499242|43499337|POS
ENSMUSG00000004071|Cdip1|chr16|-|RI|4768744|4769795|4768744|4769018|4769639|4769795	0.102	ENSMUSG00000004071|Cdip1|chr16|-|RI|4768744|4769795|4768744|4769018|4769639|4769795|POS
ENSMUSG00000033790|Tubgcp5|chr7|+|RI|55825579|55826321|55825579|55825705|55826232|55826321	0.102	ENSMUSG00000033790|Tubgcp5|chr7|+|RI|55825579|55826321|55825579|55825705|55826232|55826321|POS
ENSMUSG00000038685|Rtel1|chr2|+|RI|181354352|181355552|181354352|181354442|181355309|181355552	0.102	ENSMUSG00000038685|Rtel1|chr2|+|RI|181354352|181355552|181354352|181354442|181355309|181355552|POS
ENSMUSG00000031993|Snx19|chr9|+|RI|30432234|30433430|30432234|30432373|30433329|30433430	0.102	ENSMUSG00000031993|Snx19|chr9|+|RI|30432234|30433430|30432234|30432373|30433329|30433430|POS
ENSMUSG00000004896|Rrnad1|chr3|-|RI|87927562|87928048|87927562|87927755|87927923|87928048	0.103	ENSMUSG00000004896|Rrnad1|chr3|-|RI|87927562|87928048|87927562|87927755|87927923|87928048|POS
ENSMUSG00000010110|Stx5a|chr19|+|RI|8748654|8748888|8748654|8748711|8748806|8748888	0.104	ENSMUSG00000010110|Stx5a|chr19|+|RI|8748654|8748888|8748654|8748711|8748806|8748888|POS
ENSMUSG00000021819|Zswim8|chr14|+|RI|20713882|20714867|20713882|20714568|20714670|20714867	0.104	ENSMUSG00000021819|Zswim8|chr14|+|RI|20713882|20714867|20713882|20714568|20714670|20714867|POS
ENSMUSG00000041215|Yeats2|chr16|+|RI|20171190|20174539|20171190|20171302|20174494|20174539	0.104	ENSMUSG00000041215|Yeats2|chr16|+|RI|20171190|20174539|20171190|20171302|20174494|20174539|POS
ENSMUSG00000037266|Rsrp1|chr4|+|A3SS|134926025|134926818|134926734|134926818|134925776|134925821	0.104	ENSMUSG00000037266|Rsrp1|chr4|+|A3SS|134926025|134926818|134926734|134926818|134925776|134925821|POS
ENSMUSG00000047617|Paxx|chr2|-|RI|25459774|25460357|25459774|25459859|25460008|25460357	0.105	ENSMUSG00000047617|Paxx|chr2|-|RI|25459774|25460357|25459774|25459859|25460008|25460357|POS
ENSMUSG00000023952|Gtpbp2|chr17|+|RI|46164193|46164833|46164193|46164378|46164724|46164833	0.106	ENSMUSG00000023952|Gtpbp2|chr17|+|RI|46164193|46164833|46164193|46164378|46164724|46164833|POS
ENSMUSG00000074272|Ceacam1|chr7|-|RI|25464848|25466437|25464848|25464880|25466316|25466437	0.106	ENSMUSG00000074272|Ceacam1|chr7|-|RI|25464848|25466437|25464848|25464880|25466316|25466437|POS
ENSMUSG00000029177|Cenpa|chr5|+|RI|30672981|30673443|30672981|30673059|30673266|30673443	0.106	ENSMUSG00000029177|Cenpa|chr5|+|RI|30672981|30673443|30672981|30673059|30673266|30673443|POS
ENSMUSG00000020692|Nle1|chr11|-|RI|82902994|82904136|82902994|82903133|82904089|82904136	0.106	ENSMUSG00000020692|Nle1|chr11|-|RI|82902994|82904136|82902994|82903133|82904089|82904136|POS
ENSMUSG00000024948|Map4k2|chr19|+|RI|6346083|6346293|6346083|6346125|6346208|6346293	0.106	ENSMUSG00000024948|Map4k2|chr19|+|RI|6346083|6346293|6346083|6346125|6346208|6346293|POS
ENSMUSG00000026970|Rbms1|chr2|-|SE|60759758|60759806|60758803|60758854|60762052|60762146	0.107	ENSMUSG00000026970|Rbms1|chr2|-|SE|60759758|60759806|60758803|60758854|60762052|60762146|POS
ENSMUSG00000019082|Slc25a22|chr7|-|RI|141432020|141432753|141432020|141432139|141432662|141432753	0.107	ENSMUSG00000019082|Slc25a22|chr7|-|RI|141432020|141432753|141432020|141432139|141432662|141432753|POS
ENSMUSG00000072501|Phf20l1|chr15|+|SE|66597676|66597754|66597358|66597447|66604026|66604240	0.107	ENSMUSG00000072501|Phf20l1|chr15|+|SE|66597676|66597754|66597358|66597447|66604026|66604240|POS
ENSMUSG00000078681|Tm2d3|chr7|+|SE|65693865|65693943|65693480|65693569|65695142|65695227	0.108	ENSMUSG00000078681|Tm2d3|chr7|+|SE|65693865|65693943|65693480|65693569|65695142|65695227|POS
ENSMUSG00000042613|Pbxip1|chr3|+|A3SS|89443100|89443248|89443121|89443248|89439516|89439601	0.109	ENSMUSG00000042613|Pbxip1|chr3|+|A3SS|89443100|89443248|89443121|89443248|89439516|89439601|POS
ENSMUSG00000038708|Golga4|chr9|+|SE|118537241|118537325|118536758|118536943|118538876|118539024	0.109	ENSMUSG00000038708|Golga4|chr9|+|SE|118537241|118537325|118536758|118536943|118538876|118539024|POS
ENSMUSG00000035798|Zdhhc17|chr10|-|RI|110949620|110950683|110949620|110949683|110950560|110950683	0.11	ENSMUSG00000035798|Zdhhc17|chr10|-|RI|110949620|110950683|110949620|110949683|110950560|110950683|POS
ENSMUSG00000048271|Rbm33|chr5|+|SE|28342394|28342514|28338995|28339308|28352471|28352643	0.11	ENSMUSG00000048271|Rbm33|chr5|+|SE|28342394|28342514|28338995|28339308|28352471|28352643|POS
ENSMUSG00000037174|Elf2|chr3|-|RI|51264869|51266866|51264869|51265006|51266752|51266866	0.111	ENSMUSG00000037174|Elf2|chr3|-|RI|51264869|51266866|51264869|51265006|51266752|51266866|POS
ENSMUSG00000055720|Ubl7|chr9|+|SE|57911716|57911825|57911050|57911171|57912637|57912850	0.111	ENSMUSG00000055720|Ubl7|chr9|+|SE|57911716|57911825|57911050|57911171|57912637|57912850|POS
ENSMUSG00000023977|Ubr2|chr17|-|MXE|46980319|46980418|46980488|46980587|46975926|46976090|46981353|46981442	0.111	ENSMUSG00000023977|Ubr2|chr17|-|MXE|46980319|46980418|46980488|46980587|46975926|46976090|46981353|46981442|POS
ENSMUSG00000041815|Poldip3|chr15|-|SE|83137467|83137554|83135293|83135389|83138131|83138522	0.111	ENSMUSG00000041815|Poldip3|chr15|-|SE|83137467|83137554|83135293|83135389|83138131|83138522|POS
ENSMUSG00000055923|Aasdh|chr5|-|SE|76894289|76894362|76891602|76891795|76896376|76896690	0.112	ENSMUSG00000055923|Aasdh|chr5|-|SE|76894289|76894362|76891602|76891795|76896376|76896690|POS
ENSMUSG00000112148|Lilrb4a|chr10|+|RI|51491433|51492163|51491433|51491718|51491860|51492163	0.112	ENSMUSG00000112148|Lilrb4a|chr10|+|RI|51491433|51492163|51491433|51491718|51491860|51492163|POS
ENSMUSG00000014778|Fhod1|chr8|-|RI|105331641|105332192|105331641|105331824|105332036|105332192	0.113	ENSMUSG00000014778|Fhod1|chr8|-|RI|105331641|105332192|105331641|105331824|105332036|105332192|POS
ENSMUSG00000004815|Dgkq|chr5|-|RI|108655289|108655593|108655289|108655364|108655439|108655593	0.114	ENSMUSG00000004815|Dgkq|chr5|-|RI|108655289|108655593|108655289|108655364|108655439|108655593|POS
ENSMUSG00000023707|Ogfod2|chr5|+|RI|124114064|124114645|124114064|124114192|124114478|124114645	0.114	ENSMUSG00000023707|Ogfod2|chr5|+|RI|124114064|124114645|124114064|124114192|124114478|124114645|POS
ENSMUSG00000026977|Marchf7|chr2|+|SE|60247487|60247512|60245211|60245260|60247889|60247957	0.114	ENSMUSG00000026977|Marchf7|chr2|+|SE|60247487|60247512|60245211|60245260|60247889|60247957|POS
ENSMUSG00000038271|Iffo1|chr6|+|RI|125149740|125151525|125149740|125149836|125151384|125151525	0.115	ENSMUSG00000038271|Iffo1|chr6|+|RI|125149740|125151525|125149740|125149836|125151384|125151525|POS
ENSMUSG00000030960|Eef1akmt2|chr7|-|SE|132831359|132831576|132827456|132827882|132837099|132837207	0.116	ENSMUSG00000030960|Eef1akmt2|chr7|-|SE|132831359|132831576|132827456|132827882|132837099|132837207|POS
ENSMUSG00000007610|Gtpbp3|chr8|+|A3SS|71490654|71490967|71490894|71490967|71490334|71490537	0.117	ENSMUSG00000007610|Gtpbp3|chr8|+|A3SS|71490654|71490967|71490894|71490967|71490334|71490537|POS
ENSMUSG00000002109|Ddb2|chr2|-|RI|91234107|91234951|91234107|91234299|91234814|91234951	0.117	ENSMUSG00000002109|Ddb2|chr2|-|RI|91234107|91234951|91234107|91234299|91234814|91234951|POS
ENSMUSG00000112023|Lilr4b|chr10|+|RI|51482868|51483878|51482868|51482904|51483761|51483878	0.118	ENSMUSG00000112023|Lilr4b|chr10|+|RI|51482868|51483878|51482868|51482904|51483761|51483878|POS
ENSMUSG00000074513|Arfip1|chr3|-|SE|84529169|84529265|84527685|84527798|84534586|84534695	0.119	ENSMUSG00000074513|Arfip1|chr3|-|SE|84529169|84529265|84527685|84527798|84534586|84534695|POS
ENSMUSG00000023952|Gtpbp2|chr17|+|SE|46163033|46163213|46161294|46161326|46163482|46163509	0.119	ENSMUSG00000023952|Gtpbp2|chr17|+|SE|46163033|46163213|46161294|46161326|46163482|46163509|POS
ENSMUSG00000040506|Ambra1|chr2|+|RI|91772290|91773747|91772290|91772437|91772710|91773747	0.119	ENSMUSG00000040506|Ambra1|chr2|+|RI|91772290|91773747|91772290|91772437|91772710|91773747|POS
ENSMUSG00000060601|Nr1h2|chr7|-|RI|44551954|44552620|44551954|44552236|44552506|44552620	0.12	ENSMUSG00000060601|Nr1h2|chr7|-|RI|44551954|44552620|44551954|44552236|44552506|44552620|POS
ENSMUSG00000048677|Tpcn2|chr7|-|A3SS|145277108|145277731|145277108|145277225|145278736|145278914	0.12	ENSMUSG00000048677|Tpcn2|chr7|-|A3SS|145277108|145277731|145277108|145277225|145278736|145278914|POS
ENSMUSG00000032308|Ulk3|chr9|+|RI|57593750|57594046|57593750|57593853|57593981|57594046	0.121	ENSMUSG00000032308|Ulk3|chr9|+|RI|57593750|57594046|57593750|57593853|57593981|57594046|POS
ENSMUSG00000010608|Rbm25|chr12|+|SE|83642401|83642519|83632252|83632417|83642628|83642698	0.121	ENSMUSG00000010608|Rbm25|chr12|+|SE|83642401|83642519|83632252|83632417|83642628|83642698|POS
ENSMUSG00000030330|Ing4|chr6|+|RI|125047481|125048237|125047481|125047587|125047792|125048237	0.123	ENSMUSG00000030330|Ing4|chr6|+|RI|125047481|125048237|125047481|125047587|125047792|125048237|POS
ENSMUSG00000005899|Smpd4|chr16|+|RI|17625719|17626538|17625719|17625862|17626429|17626538	0.124	ENSMUSG00000005899|Smpd4|chr16|+|RI|17625719|17626538|17625719|17625862|17626429|17626538|POS
ENSMUSG00000028461|Ccdc107|chr4|+|RI|43495508|43495921|43495508|43495621|43495696|43495921	0.124	ENSMUSG00000028461|Ccdc107|chr4|+|RI|43495508|43495921|43495508|43495621|43495696|43495921|POS
ENSMUSG00000011658|Fuz|chr7|+|RI|44897519|44898700|44897519|44897624|44898502|44898700	0.124	ENSMUSG00000011658|Fuz|chr7|+|RI|44897519|44898700|44897519|44897624|44898502|44898700|POS
ENSMUSG00000032028|Nxpe2|chr9|-|SE|48326090|48326821|48323040|48323102|48339513|48339622	0.124	ENSMUSG00000032028|Nxpe2|chr9|-|SE|48326090|48326821|48323040|48323102|48339513|48339622|POS
ENSMUSG00000060601|Nr1h2|chr7|-|RI|44551954|44552620|44551954|44552245|44552506|44552620	0.124	ENSMUSG00000060601|Nr1h2|chr7|-|RI|44551954|44552620|44551954|44552245|44552506|44552620|POS
ENSMUSG00000031389|Arhgap4|chrX|-|A3SS|73905650|73905893|73905650|73905863|73906156|73906219	0.124	ENSMUSG00000031389|Arhgap4|chrX|-|A3SS|73905650|73905893|73905650|73905863|73906156|73906219|POS
ENSMUSG00000057649|Brd9|chr13|+|RI|73941943|73942806|73941943|73942054|73942630|73942806	0.125	ENSMUSG00000057649|Brd9|chr13|+|RI|73941943|73942806|73941943|73942054|73942630|73942806|POS
ENSMUSG00000030468|Siglecg|chr7|+|RI|43409242|43410556|43409242|43409521|43410508|43410556	0.125	ENSMUSG00000030468|Siglecg|chr7|+|RI|43409242|43410556|43409242|43409521|43410508|43410556|POS
ENSMUSG00000010608|Rbm25|chr12|+|SE|83642401|83642519|83639127|83639191|83642628|83642698	0.126	ENSMUSG00000010608|Rbm25|chr12|+|SE|83642401|83642519|83639127|83639191|83642628|83642698|POS
ENSMUSG00000024150|Mcfd2|chr17|-|SE|87258749|87258881|87257927|87258089|87265834|87265895	0.126	ENSMUSG00000024150|Mcfd2|chr17|-|SE|87258749|87258881|87257927|87258089|87265834|87265895|POS
ENSMUSG00000041263|Rusc1|chr3|-|RI|89089668|89089975|89089668|89089767|89089920|89089975	0.127	ENSMUSG00000041263|Rusc1|chr3|-|RI|89089668|89089975|89089668|89089767|89089920|89089975|POS
ENSMUSG00000047617|Paxx|chr2|-|RI|25460444|25460715|25460444|25460494|25460654|25460715	0.128	ENSMUSG00000047617|Paxx|chr2|-|RI|25460444|25460715|25460444|25460494|25460654|25460715|POS
ENSMUSG00000073889|Il11ra1|chr4|+|RI|41765274|41765552|41765274|41765307|41765385|41765552	0.129	ENSMUSG00000073889|Il11ra1|chr4|+|RI|41765274|41765552|41765274|41765307|41765385|41765552|POS
ENSMUSG00000037112|Sik2|chr9|-|RI|50892800|50895961|50892800|50894081|50895343|50895961	0.129	ENSMUSG00000037112|Sik2|chr9|-|RI|50892800|50895961|50892800|50894081|50895343|50895961|POS
ENSMUSG00000032580|Rbm5|chr9|-|RI|107756908|107760391|107756908|107756992|107760321|107760391	0.131	ENSMUSG00000032580|Rbm5|chr9|-|RI|107756908|107760391|107756908|107756992|107760321|107760391|POS
ENSMUSG00000042249|Grk3|chr5|-|A3SS|112969167|112969308|112969167|112969269|112973506|112973580	0.131	ENSMUSG00000042249|Grk3|chr5|-|A3SS|112969167|112969308|112969167|112969269|112973506|112973580|POS
ENSMUSG00000005823|Gpr108|chr17|-|A3SS|57242940|57243134|57242940|57243113|57244246|57244368	0.131	ENSMUSG00000005823|Gpr108|chr17|-|A3SS|57242940|57243134|57242940|57243113|57244246|57244368|POS
ENSMUSG00000021809|Nudt13|chr14|+|RI|20306231|20307799|20306231|20306366|20307692|20307799	0.132	ENSMUSG00000021809|Nudt13|chr14|+|RI|20306231|20307799|20306231|20306366|20307692|20307799|POS
ENSMUSG00000040528|Milr1|chr11|+|SE|106757702|106757809|106754781|106755051|106763855|106763948	0.132	ENSMUSG00000040528|Milr1|chr11|+|SE|106757702|106757809|106754781|106755051|106763855|106763948|POS
ENSMUSG00000071337|Tia1|chr6|+|RI|86423605|86424420|86423605|86423671|86424344|86424420	0.133	ENSMUSG00000071337|Tia1|chr6|+|RI|86423605|86424420|86423605|86423671|86424344|86424420|POS
ENSMUSG00000037773|Pced1a|chr2|-|RI|130422224|130422704|130422224|130422375|130422465|130422704	0.133	ENSMUSG00000037773|Pced1a|chr2|-|RI|130422224|130422704|130422224|130422375|130422465|130422704|POS
ENSMUSG00000029060|Mib2|chr4|-|RI|155655521|155656305|155655521|155655700|155656071|155656305	0.134	ENSMUSG00000029060|Mib2|chr4|-|RI|155655521|155656305|155655521|155655700|155656071|155656305|POS
ENSMUSG00000037174|Elf2|chr3|-|A3SS|51264868|51265042|51264868|51265006|51266752|51266866	0.134	ENSMUSG00000037174|Elf2|chr3|-|A3SS|51264868|51265042|51264868|51265006|51266752|51266866|POS
ENSMUSG00000112023|Lilr4b|chr10|+|RI|51481139|51483878|51481139|51481869|51482868|51483878	0.134	ENSMUSG00000112023|Lilr4b|chr10|+|RI|51481139|51483878|51481139|51481869|51482868|51483878|POS
ENSMUSG00000073434|Wdr90|chr17|-|RI|25860371|25860817|25860371|25860542|25860708|25860817	0.134	ENSMUSG00000073434|Wdr90|chr17|-|RI|25860371|25860817|25860371|25860542|25860708|25860817|POS
ENSMUSG00000022515|Anks3|chr16|-|RI|4947648|4948363|4947648|4947758|4948225|4948363	0.135	ENSMUSG00000022515|Anks3|chr16|-|RI|4947648|4948363|4947648|4947758|4948225|4948363|POS
ENSMUSG00000021870|Slmap|chr14|-|SE|26459409|26459460|26442574|26442634|26460041|26460210	0.135	ENSMUSG00000021870|Slmap|chr14|-|SE|26459409|26459460|26442574|26442634|26460041|26460210|POS
ENSMUSG00000014418|Hps5|chr7|-|RI|46774813|46775951|46774813|46774937|46775764|46775951	0.135	ENSMUSG00000014418|Hps5|chr7|-|RI|46774813|46775951|46774813|46774937|46775764|46775951|POS
ENSMUSG00000033540|Idua|chr5|+|RI|108680110|108680497|108680110|108680206|108680294|108680497	0.135	ENSMUSG00000033540|Idua|chr5|+|RI|108680110|108680497|108680110|108680206|108680294|108680497|POS
ENSMUSG00000017756|Slc12a7|chr13|+|RI|73806028|73806437|73806028|73806198|73806305|73806437	0.135	ENSMUSG00000017756|Slc12a7|chr13|+|RI|73806028|73806437|73806028|73806198|73806305|73806437|POS
ENSMUSG00000004896|Rrnad1|chr3|-|RI|87924343|87925431|87924343|87924528|87924946|87925431	0.136	ENSMUSG00000004896|Rrnad1|chr3|-|RI|87924343|87925431|87924343|87924528|87924946|87925431|POS
ENSMUSG00000020456|Ogdh|chr11|+|MXE|6316764|6316855|6316977|6317080|6313787|6313979|6334532|6334648	0.136	ENSMUSG00000020456|Ogdh|chr11|+|MXE|6316764|6316855|6316977|6317080|6313787|6313979|6334532|6334648|POS
ENSMUSG00000029101|Rgs12|chr5|+|SE|35030467|35030621|35030010|35030090|35031870|35032052	0.136	ENSMUSG00000029101|Rgs12|chr5|+|SE|35030467|35030621|35030010|35030090|35031870|35032052|POS
ENSMUSG00000021819|Zswim8|chr14|+|RI|20722459|20723006|20722459|20722579|20722827|20723006	0.137	ENSMUSG00000021819|Zswim8|chr14|+|RI|20722459|20723006|20722459|20722579|20722827|20723006|POS
ENSMUSG00000026200|Glb1l|chr1|-|RI|75208686|75209222|75208686|75208837|75209055|75209222	0.137	ENSMUSG00000026200|Glb1l|chr1|-|RI|75208686|75209222|75208686|75208837|75209055|75209222|POS
ENSMUSG00000052760|A630001G21Rik|chr1|-|A3SS|85723097|85723387|85723097|85723181|85725120|85725289	0.137	ENSMUSG00000052760|A630001G21Rik|chr1|-|A3SS|85723097|85723387|85723097|85723181|85725120|85725289|POS
ENSMUSG00000029521|Chek2|chr5|+|SE|110840410|110840540|110839978|110840048|110841205|110841333	0.138	ENSMUSG00000029521|Chek2|chr5|+|SE|110840410|110840540|110839978|110840048|110841205|110841333|POS
ENSMUSG00000036916|Zfp280c|chrX|-|SE|48543584|48543703|48543404|48543441|48547264|48547327	0.138	ENSMUSG00000036916|Zfp280c|chrX|-|SE|48543584|48543703|48543404|48543441|48547264|48547327|POS
ENSMUSG00000031592|Pcm1|chr8|+|SE|41261359|41261476|41261010|41261181|41267186|41267364	0.139	ENSMUSG00000031592|Pcm1|chr8|+|SE|41261359|41261476|41261010|41261181|41267186|41267364|POS
ENSMUSG00000031389|Arhgap4|chrX|-|RI|73900098|73900469|73900098|73900183|73900277|73900469	0.14	ENSMUSG00000031389|Arhgap4|chrX|-|RI|73900098|73900469|73900098|73900183|73900277|73900469|POS
ENSMUSG00000047767|Atg16l2|chr7|-|RI|101292107|101292424|101292107|101292179|101292353|101292424	0.14	ENSMUSG00000047767|Atg16l2|chr7|-|RI|101292107|101292424|101292107|101292179|101292353|101292424|POS
ENSMUSG00000026554|Dcaf8|chr1|+|RI|172186295|172187460|172186295|172186368|172187352|172187460	0.141	ENSMUSG00000026554|Dcaf8|chr1|+|RI|172186295|172187460|172186295|172186368|172187352|172187460|POS
ENSMUSG00000026708|Cenpl|chr1|+|A3SS|161078228|161078480|161078328|161078480|161074756|161074930	0.141	ENSMUSG00000026708|Cenpl|chr1|+|A3SS|161078228|161078480|161078328|161078480|161074756|161074930|POS
ENSMUSG00000028438|Kif24|chr4|-|SE|41429266|41429411|41428344|41428982|41464709|41464846	0.141	ENSMUSG00000028438|Kif24|chr4|-|SE|41429266|41429411|41428344|41428982|41464709|41464846|POS
ENSMUSG00000040528|Milr1|chr11|+|MXE|106757702|106757809|106761185|106761296|106754781|106755051|106763855|106763948	0.143	ENSMUSG00000040528|Milr1|chr11|+|MXE|106757702|106757809|106761185|106761296|106754781|106755051|106763855|106763948|POS
ENSMUSG00000042323|Pbrm1|chr14|+|SE|31056235|31056280|31054157|31054255|31061468|31061745	0.144	ENSMUSG00000042323|Pbrm1|chr14|+|SE|31056235|31056280|31054157|31054255|31061468|31061745|POS
ENSMUSG00000022833|Ccdc14|chr16|+|RI|34705160|34706897|34705160|34705255|34706386|34706897	0.145	ENSMUSG00000022833|Ccdc14|chr16|+|RI|34705160|34706897|34705160|34705255|34706386|34706897|POS
ENSMUSG00000027381|Bcl2l11|chr2|+|RI|128128619|128129014|128128619|128128756|128128924|128129014	0.147	ENSMUSG00000027381|Bcl2l11|chr2|+|RI|128128619|128129014|128128619|128128756|128128924|128129014|POS
ENSMUSG00000042790|Rnf214|chr9|-|RI|45866565|45867632|45866565|45866661|45867499|45867632	0.147	ENSMUSG00000042790|Rnf214|chr9|-|RI|45866565|45867632|45866565|45866661|45867499|45867632|POS
ENSMUSG00000031314|Taf1|chrX|+|A3SS|101540759|101541001|101540822|101541001|101539067|101539187	0.15	ENSMUSG00000031314|Taf1|chrX|+|A3SS|101540759|101541001|101540822|101541001|101539067|101539187|POS
ENSMUSG00000061950|Ppp4r1|chr17|+|A3SS|65803159|65803295|65803210|65803295|65783623|65783668	0.151	ENSMUSG00000061950|Ppp4r1|chr17|+|A3SS|65803159|65803295|65803210|65803295|65783623|65783668|POS
ENSMUSG00000028453|Fancg|chr4|-|RI|43003226|43003932|43003226|43003312|43003782|43003932	0.151	ENSMUSG00000028453|Fancg|chr4|-|RI|43003226|43003932|43003226|43003312|43003782|43003932|POS
ENSMUSG00000028759|Hp1bp3|chr4|+|SE|138221525|138221718|138217267|138217294|138222088|138222188	0.151	ENSMUSG00000028759|Hp1bp3|chr4|+|SE|138221525|138221718|138217267|138217294|138222088|138222188|POS
ENSMUSG00000039262|Prrc2b|chr2|+|SE|32229262|32229344|32226944|32227036|32230610|32231162	0.152	ENSMUSG00000039262|Prrc2b|chr2|+|SE|32229262|32229344|32226944|32227036|32230610|32231162|POS
ENSMUSG00000071337|Tia1|chr6|+|SE|86419100|86419133|86418877|86418932|86420323|86420411	0.152	ENSMUSG00000071337|Tia1|chr6|+|SE|86419100|86419133|86418877|86418932|86420323|86420411|POS
ENSMUSG00000020910|Adprm|chr11|-|SE|67051680|67051778|67041392|67042107|67052534|67052570	0.154	ENSMUSG00000020910|Adprm|chr11|-|SE|67051680|67051778|67041392|67042107|67052534|67052570|POS
ENSMUSG00000029290|Zfp326|chr5|+|RI|105886316|105888839|105886316|105886428|105888433|105888839	0.155	ENSMUSG00000029290|Zfp326|chr5|+|RI|105886316|105888839|105886316|105886428|105888433|105888839|POS
ENSMUSG00000058886|Deaf1|chr7|-|SE|141324441|141324616|141324081|141324179|141327278|141327584	0.155	ENSMUSG00000058886|Deaf1|chr7|-|SE|141324441|141324616|141324081|141324179|141327278|141327584|POS
ENSMUSG00000019302|Atp6v0a1|chr11|+|A3SS|101026659|101026763|101026680|101026763|101021053|101021182	0.155	ENSMUSG00000019302|Atp6v0a1|chr11|+|A3SS|101026659|101026763|101026680|101026763|101021053|101021182|POS
ENSMUSG00000030468|Siglecg|chr7|+|RI|43411561|43412174|43411561|43411819|43411889|43412174	0.156	ENSMUSG00000030468|Siglecg|chr7|+|RI|43411561|43412174|43411561|43411819|43411889|43412174|POS
ENSMUSG00000004815|Dgkq|chr5|-|RI|108650489|108650968|108650489|108650638|108650816|108650968	0.158	ENSMUSG00000004815|Dgkq|chr5|-|RI|108650489|108650968|108650489|108650638|108650816|108650968|POS
ENSMUSG00000043065|Spice1|chr16|+|RI|44369879|44370378|44369879|44370019|44370237|44370378	0.158	ENSMUSG00000043065|Spice1|chr16|+|RI|44369879|44370378|44369879|44370019|44370237|44370378|POS
ENSMUSG00000024190|Dusp1|chr17|-|RI|26506984|26507719|26506984|26507204|26507573|26507719	0.159	ENSMUSG00000024190|Dusp1|chr17|-|RI|26506984|26507719|26506984|26507204|26507573|26507719|POS
ENSMUSG00000014850|Msh3|chr13|-|RI|92342245|92345101|92342245|92342412|92344955|92345101	0.159	ENSMUSG00000014850|Msh3|chr13|-|RI|92342245|92345101|92342245|92342412|92344955|92345101|POS
ENSMUSG00000046111|Cep295|chr9|-|RI|15317458|15317767|15317458|15317593|15317673|15317767	0.159	ENSMUSG00000046111|Cep295|chr9|-|RI|15317458|15317767|15317458|15317593|15317673|15317767|POS
ENSMUSG00000031262|Cenpi|chrX|+|SE|134308565|134308633|134308083|134308228|134308726|134308847	0.16	ENSMUSG00000031262|Cenpi|chrX|+|SE|134308565|134308633|134308083|134308228|134308726|134308847|POS
ENSMUSG00000024943|Smc5|chr19|-|SE|23215154|23215199|23214644|23214740|23218404|23218530	0.163	ENSMUSG00000024943|Smc5|chr19|-|SE|23215154|23215199|23214644|23214740|23218404|23218530|POS
ENSMUSG00000055897|Ppp4r1l-ps|chr2|-|A3SS|173615482|173616423|173615482|173615576|173659322|173659367	0.164	ENSMUSG00000055897|Ppp4r1l-ps|chr2|-|A3SS|173615482|173616423|173615482|173615576|173659322|173659367|POS
ENSMUSG00000008206|Cers4|chr8|+|RI|4519462|4520308|4519462|4519513|4520215|4520308	0.165	ENSMUSG00000008206|Cers4|chr8|+|RI|4519462|4520308|4519462|4519513|4520215|4520308|POS
ENSMUSG00000020898|Ctc1|chr11|+|RI|69021029|69022614|69021029|69021193|69022392|69022614	0.166	ENSMUSG00000020898|Ctc1|chr11|+|RI|69021029|69022614|69021029|69021193|69022392|69022614|POS
ENSMUSG00000029534|St7|chr6|+|RI|17850356|17852412|17850356|17850425|17852257|17852412	0.168	ENSMUSG00000029534|St7|chr6|+|RI|17850356|17852412|17850356|17850425|17852257|17852412|POS
ENSMUSG00000033857|Engase|chr11|+|RI|118485756|118486553|118485756|118485905|118486444|118486553	0.168	ENSMUSG00000033857|Engase|chr11|+|RI|118485756|118486553|118485756|118485905|118486444|118486553|POS
ENSMUSG00000038685|Rtel1|chr2|+|SE|181355008|181355125|181354352|181354442|181355327|181355552	0.17	ENSMUSG00000038685|Rtel1|chr2|+|SE|181355008|181355125|181354352|181354442|181355327|181355552|POS
[truncated: 43 more rows]
