# Supplementary material for: U2af1S34F and U2af1Q157R myeloid neoplasm-associated hotspot mutations induce distinct hematopoietic phenotypes in mice
Source: Leukemia. 2026 May 6;40(7):1467–81. doi: 10.1038/s41375-026-02974-7 (PMC13276503; doi:10.1038/s41375-026-02974-7)
Supplement: Supplementary file 9 — Table S9 Gene ontology of mouse KL DSG [file 41375_2026_2974_MOESM9_ESM.xlsx]

## Sheet: KL_S34F_DSG_GO
GO_BP	Description	GeneRatio	BgRatio	pvalue	p.adjust	qvalue	geneID	Count
GO:0016570	histone modification	51/796	440/15307	6.33955e-08	0.000292887	0.00028508	Jmjd1c/Trp53/Morf4l2/Hpf1/Map3k7/Brms1l/Mta1/Kdm3b/Mettl8/Trip12/Usp3/Bcor/Ogt/Meaf6/Kdm6a/Ehmt1/Supt20/Suv39h2/Nfyb/App/Huwe1/Rif1/Arid4b/Atf2/Kdm5a/Rnf8/Rps6ka5/Ufl1/Phf20l1/Atrx/Wac/Trim37/Nsd3/Setd5/Brd1/Ubr2/Yeats2/Hcfc1/Kmt5b/Pml/Asxl2/Cdk9/Glyr1/Ehmt2/Ncor1/Hdac7/Setdb1/Ep400/Atxn7/Kansl2/Mysm1	51
GO:1903311	regulation of mRNA metabolic process	34/796	277/15307	2.87159e-06	0.00663337	0.00645654	Hnrnpa2b1/Mbnl1/Pabpc4/Papola/Rbm25/Pan3/Fmr1/Hnrnpm/Hnrnpd/Fxr1/Mbnl3/Myef2/Celf2/Rbm39/Rbm5/Tut4/Sltm/Csde1/Pum2/Cnot2/Celf1/Ptbp1/Safb2/Hnrnpk/Tnrc6c/Angel2/Fam172a/Tut7/Cdk9/Rnasel/Rnps1/Hnrnpr/Rbm7/Tnrc6a	34
GO:0000380	alternative mRNA splicing, via spliceosome	14/796	74/15307	2.33886e-05	0.0226896	0.0220847	Mbnl1/Rbm25/Fmr1/Hnrnpm/Fxr1/Mbnl3/Celf2/Cdk13/Rbm5/Celf1/Ptbp1/Fam172a/Rnps1/Rbm7	14
GO:0043484	regulation of RNA splicing	23/796	170/15307	2.43623e-05	0.0226896	0.0220847	Hnrnpa2b1/Mbnl1/Rbm25/Fmr1/Fxr1/Hnrnph3/Mbnl3/Clk1/Celf2/Supt20/Rbm39/Ccnl2/Rbm5/Mettl4/Celf1/Ptbp1/Clk3/Hnrnpk/Fam172a/Rnps1/Atxn7/Ptbp2/Rbm7	23
GO:0000381	regulation of alternative mRNA splicing, via spliceosome	12/796	57/15307	2.92357e-05	0.0226896	0.0220847	Mbnl1/Rbm25/Fmr1/Fxr1/Mbnl3/Celf2/Rbm5/Celf1/Ptbp1/Fam172a/Rnps1/Rbm7	12
GO:0018205	peptidyl-lysine modification	39/796	375/15307	2.9467e-05	0.0226896	0.0220847	Morf4l2/Map3k7/Senp6/Mettl8/Bcor/Ogt/Meaf6/Setd3/Ehmt1/Supt20/Senp2/Suv39h2/Senp1/Nfyb/App/Rif1/Arid4b/Atf2/Rps6ka5/Phf20l1/Atrx/Nsd3/Setd5/Brd1/Eya1/Yeats2/Hcfc1/Kmt5b/Pml/Asxl2/Traf7/Glyr1/Dip2a/Etfbkmt/Ehmt2/Setdb1/Ep400/Atxn7/Kansl2	39
GO:0006376	mRNA splice site selection	8/796	27/15307	4.7352e-05	0.0312523	0.0304192	Mbnl1/Celf2/Celf1/Khdc4/Snrpc/Prpf39/Luc7l2/Ptbp2	8
GO:0031056	regulation of histone modification	23/796	182/15307	7.21584e-05	0.0400527	0.0389849	Trp53/Hpf1/Trip12/Bcor/Ogt/Ehmt1/Nfyb/App/Rif1/Kdm5a/Rps6ka5/Atrx/Nsd3/Setd5/Yeats2/Hcfc1/Pml/Asxl2/Cdk9/Glyr1/Ehmt2/Ncor1/Kansl2	23
GO:0006401	RNA catabolic process	29/796	258/15307	7.80247e-05	0.0400527	0.0389849	Pabpc4/Pan3/Sidt2/Fmr1/Hnrnpm/Hnrnpd/Fxr1/Myef2/Zc3h4/Nbdy/Gtpbp2/Tut4/Csde1/Pum2/Cnot2/Zc3h18/Xrn1/Celf1/Mtpap/Tnrc6c/Angel2/Edc4/Tut7/Rnasel/Rnps1/Skiv2l/Hnrnpr/Rbm7/Tnrc6a	29
GO:0050684	regulation of mRNA processing	19/796	138/15307	9.56633e-05	0.0404047	0.0393276	Hnrnpa2b1/Mbnl1/Papola/Rbm25/Fmr1/Fxr1/Mbnl3/Celf2/Rbm39/Rbm5/Sltm/Celf1/Ptbp1/Safb2/Hnrnpk/Fam172a/Cdk9/Rnps1/Rbm7	19
GO:0010608	post-transcriptional regulation of gene expression	43/796	452/15307	9.62016e-05	0.0404047	0.0393276	Mapk1/Pabpc4/Pkm/Trp53/Mknk1/Pan3/Dph3/Fmr1/Hnrnpm/Hnrnpd/Tcof1/Fxr1/Myef2/Pstk/Celf2/Lsm14a/Dnajc1/App/Tut4/Csde1/Pum2/Guf1/Cnot2/Zc3h18/Xrn1/Celf1/Eif4g3/Poldip3/Ilf3/Tnrc6c/Angel2/Pml/Tarbp2/Tut7/Rnasel/Ncor1/Eif5/Nat10/Hnrnpr/Mvk/Prg3/Tnrc6a/Tsc1	43
GO:0018023	peptidyl-lysine trimethylation	11/796	57/15307	0.000143944	0.0510055	0.0496458	Ogt/Setd3/Suv39h2/Nfyb/Arid4b/Atrx/Nsd3/Setd5/Kmt5b/Etfbkmt/Setdb1	11
GO:0006402	mRNA catabolic process	25/796	216/15307	0.000150195	0.0510055	0.0496458	Pabpc4/Pan3/Fmr1/Hnrnpm/Hnrnpd/Fxr1/Myef2/Nbdy/Gtpbp2/Tut4/Csde1/Pum2/Cnot2/Xrn1/Celf1/Mtpap/Tnrc6c/Angel2/Edc4/Tut7/Rnasel/Rnps1/Skiv2l/Hnrnpr/Tnrc6a	25
GO:0031023	microtubule organizing center organization	19/796	143/15307	0.000154562	0.0510055	0.0496458	Ppp1r12a/Gen1/Fes/Ccnl2/Bcas3/Trim37/Usp33/Bnip2/Cdk11b/Haus2/Cep295/Nat10/4933427D14Rik/Azin1/Cep250/Cep63/Fbxw11/Pde4dip/Spice1	19
GO:0006397	mRNA processing	41/796	438/15307	0.000196533	0.0605322	0.0589185	Hnrnpa2b1/Mbnl1/Papola/Rbm26/Rbm25/Pan3/Fmr1/Hnrnpm/Fxr1/Mbnl3/Celf2/Cdk13/Rbm39/Srrt/App/Rbm5/Sltm/Celf1/Ptbp1/Fip1l1/Mtpap/Scaf4/Safb2/Hnrnpk/Khdc4/Rprd2/Fam172a/Rprd1a/Snrnp48/Cpsf1/Cdk9/Dbr1/Rnasel/Snrpc/Prpf39/Dnajc17/Rnps1/Luc7l2/Ptbp2/Rbm7/Zcrb1	41
GO:0048024	regulation of mRNA splicing, via spliceosome	15/796	101/15307	0.000218956	0.0608841	0.059261	Hnrnpa2b1/Mbnl1/Rbm25/Fmr1/Fxr1/Mbnl3/Celf2/Rbm39/Rbm5/Celf1/Ptbp1/Hnrnpk/Fam172a/Rnps1/Rbm7	15
GO:0032259	methylation	34/796	342/15307	0.000224032	0.0608841	0.059261	Rab6a/Mettl8/Gsk3a/Alkbh8/Bcor/Ogt/Setd3/Trmt13/Ehmt1/Gnas/Suv39h2/Nfyb/Mtr/Rif1/Arid4b/Mettl4/Atrx/Comt/Nsd3/Setd5/Ilf3/Trmt61a/Hcfc1/Kmt5b/Asxl2/Etfbkmt/Ehmt2/Setdb1/Trmt2a/Trmt11/Kansl2/Mettl17/Trmt10b/Trmt2b	34
GO:0034248	regulation of cellular amide metabolic process	38/796	401/15307	0.000260936	0.0639378	0.0622334	Mapk1/Pkm/Trp53/Mknk1/Pan3/Dph3/Fmr1/Hnrnpd/Tcof1/Fxr1/Gsk3a/Pstk/Lsm14a/Picalm/Dnajc1/App/Tut4/Csde1/Pum2/Guf1/Cnot2/Xrn1/Celf1/Eif4g3/Poldip3/Ilf3/Tnrc6c/Pml/Gga3/Tarbp2/Tut7/Eif5/Nat10/Hnrnpr/Mvk/Prg3/Tnrc6a/Tsc1	38
GO:0018022	peptidyl-lysine methylation	18/796	137/15307	0.000262948	0.0639378	0.0622334	Bcor/Ogt/Setd3/Ehmt1/Suv39h2/Nfyb/Rif1/Arid4b/Atrx/Nsd3/Setd5/Hcfc1/Kmt5b/Asxl2/Etfbkmt/Ehmt2/Setdb1/Kansl2	18
GO:0006417	regulation of translation	34/796	349/15307	0.000326729	0.0754743	0.0734624	Mapk1/Pkm/Mknk1/Pan3/Dph3/Fmr1/Hnrnpd/Tcof1/Fxr1/Pstk/Lsm14a/Dnajc1/App/Tut4/Csde1/Pum2/Guf1/Cnot2/Xrn1/Celf1/Eif4g3/Poldip3/Ilf3/Tnrc6c/Pml/Tarbp2/Tut7/Eif5/Nat10/Hnrnpr/Mvk/Prg3/Tnrc6a/Tsc1	34
GO:0007098	centrosome cycle	17/796	129/15307	0.000372212	0.0791375	0.0770278	Ppp1r12a/Gen1/Fes/Ccnl2/Trim37/Usp33/Bnip2/Cdk11b/Haus2/Cep295/Nat10/4933427D14Rik/Azin1/Cep250/Cep63/Pde4dip/Spice1	17
GO:0043543	protein acylation	27/796	257/15307	0.000408869	0.0791375	0.0770278	Morf4l2/Map3k7/Mettl8/Ogt/Meaf6/Supt20/Nfyb/Zdhhc16/App/Atf2/Ppm1b/Rps6ka5/Phf20l1/Setd5/Brd1/Yeats2/Hcfc1/Pml/Glyr1/Cep295/Dip2a/Ep400/Nat10/Atxn7/Kansl2/Naa16/Nmt2	27
GO:2000112	regulation of cellular macromolecule biosynthetic process	39/796	425/15307	0.000415516	0.0791375	0.0770278	Mapk1/Pkm/Mknk1/Pan3/Dph3/Fmr1/Hnrnpd/Tcof1/Fxr1/Pstk/Lsm14a/Dnajc1/App/Tut4/Csde1/Insr/Pum2/Guf1/Cnot2/Xrn1/Celf1/Eif4g3/Poldip3/Ilf3/Tnrc6c/Pxylp1/Pomt1/Pml/Tarbp2/Il15/Tut7/Eif5/Nat10/Hnrnpr/Mvk/Prg3/Soat1/Tnrc6a/Tsc1	39
GO:0006302	double-strand break repair	29/796	285/15307	0.000432783	0.0791375	0.0770278	Trp53/Morf4l2/Hpf1/Smc6/Mta1/Rnf138/Foxm1/Trip12/Meaf6/Gen1/Pot1b/Cdc7/Hdgfl2/Pbrm1/Rif1/Rnf8/Samhd1/Ube2v2/Eya1/Kmt5b/Pml/Mad2l2/Slx4/Rad52/Iffo1/Ep400/Mcm9/Rev3l/Zcwpw1	29
GO:0006473	protein acetylation	24/796	219/15307	0.000456932	0.0791375	0.0770278	Morf4l2/Map3k7/Mettl8/Ogt/Meaf6/Supt20/Nfyb/App/Atf2/Rps6ka5/Phf20l1/Setd5/Brd1/Yeats2/Hcfc1/Pml/Glyr1/Cep295/Dip2a/Ep400/Nat10/Atxn7/Kansl2/Naa16	24
GO:0043488	regulation of mRNA stability	18/796	144/15307	0.000486923	0.0791375	0.0770278	Pabpc4/Pan3/Fmr1/Hnrnpm/Hnrnpd/Fxr1/Myef2/Tut4/Csde1/Pum2/Cnot2/Celf1/Tnrc6c/Angel2/Tut7/Rnasel/Hnrnpr/Tnrc6a	18
GO:0034655	nucleobase-containing compound catabolic process	34/796	357/15307	0.000493785	0.0791375	0.0770278	Pabpc4/Pan3/Sidt2/Fmr1/Hnrnpm/Hnrnpd/Fxr1/Myef2/Zc3h4/Nbdy/Gtpbp2/Tut4/Samhd1/Csde1/Pum2/Cnot2/Zc3h18/Xrn1/Celf1/Mtpap/Nudt7/Entpd5/Tnrc6c/Angel2/Edc4/Tut7/Rnasel/Mlycd/Nudt13/Rnps1/Skiv2l/Hnrnpr/Rbm7/Tnrc6a	34
GO:0000245	spliceosomal complex assembly	9/796	46/15307	0.000515845	0.0791375	0.0770278	Mbnl1/Celf2/Rbm5/Celf1/Khdc4/Snrpc/Prpf39/Luc7l2/Ptbp2	9
GO:0043487	regulation of RNA stability	19/796	157/15307	0.000517754	0.0791375	0.0770278	Pabpc4/Pan3/Fmr1/Hnrnpm/Hnrnpd/Fxr1/Myef2/Tut4/Csde1/Pum2/Cnot2/Zc3h18/Celf1/Tnrc6c/Angel2/Tut7/Rnasel/Hnrnpr/Tnrc6a	19
GO:0043414	macromolecule methylation	30/796	302/15307	0.000520274	0.0791375	0.0770278	Rab6a/Mettl8/Gsk3a/Alkbh8/Bcor/Ogt/Setd3/Trmt13/Ehmt1/Gnas/Suv39h2/Nfyb/Mtr/Rif1/Arid4b/Mettl4/Atrx/Nsd3/Setd5/Ilf3/Trmt61a/Hcfc1/Kmt5b/Asxl2/Etfbkmt/Ehmt2/Setdb1/Kansl2/Trmt10b/Trmt2b	30
GO:0043161	proteasome-mediated ubiquitin-dependent protein catabolic process	38/796	416/15307	0.000535394	0.0791375	0.0770278	Ifi27/Anapc5/Ube2w/Mta1/Ubxn2a/Chfr/Gsk3a/Styx/Trip12/Os9/Ogt/Klhdc3/Arrb2/Ube4a/Rnf216/Klhdc10/Senp1/Huwe1/Znrf1/Ufl1/Wac/Axin1/Ankzf1/Ube2v2/Ubr2/Rnf14/Pml/Jkamp/Tlk2/Armc8/Ubqln1/Sharpin/Mapk9/Ube2j1/Fbxw11/Kctd17/Kctd2/Nrros	38
GO:0000209	protein polyubiquitination	25/796	235/15307	0.000548138	0.0791375	0.0770278	Marchf7/Ifi27/Anapc5/Ttc3/Ube2w/G2e3/Chfr/Trip12/Ube4a/Rnf216/Rnf111/Huwe1/Znrf1/Rnf8/Ambra1/Axin1/Tnks2/Ube2v2/Zfp91/Nmi/Rnf14/Peli2/Sharpin/Ube2j1/Fbxw11	25
GO:0034968	histone lysine methylation	16/796	123/15307	0.000633355	0.0886696	0.0863059	Bcor/Ogt/Ehmt1/Suv39h2/Nfyb/Rif1/Arid4b/Atrx/Nsd3/Setd5/Hcfc1/Kmt5b/Asxl2/Ehmt2/Setdb1/Kansl2	16
GO:0017148	negative regulation of translation	19/796	160/15307	0.000655494	0.0890701	0.0866957	Pan3/Fmr1/Hnrnpd/Fxr1/Lsm14a/Tut4/Csde1/Cnot2/Xrn1/Celf1/Ilf3/Tnrc6c/Pml/Tut7/Hnrnpr/Mvk/Prg3/Tnrc6a/Tsc1	19
GO:0042177	negative regulation of protein catabolic process	14/796	101/15307	0.000717984	0.0947739	0.0922475	Mdm4/Marchf7/Styx/Ogt/Senp1/Wac/Fyn/Snx12/Lrig2/Mad2l2/Tlk2/Ctsa/Azin1/Rgp1	14
GO:0019439	aromatic compound catabolic process	36/796	395/15307	0.000773518	0.0992682	0.096622	Pabpc4/Pan3/Sidt2/Fmr1/Hnrnpm/Hnrnpd/Fxr1/Myef2/Zc3h4/Gstz1/Nbdy/Gtpbp2/Tut4/Samhd1/Csde1/Pum2/Cnot2/Zc3h18/Xrn1/Celf1/Comt/Mtpap/Nudt7/Entpd5/Tnrc6c/Angel2/Edc4/Tut7/Rnasel/Mlycd/Nudt13/Rnps1/Skiv2l/Hnrnpr/Rbm7/Tnrc6a	36
GO_MF	Description	GeneRatio	BgRatio	pvalue	p.adjust	qvalue	geneID	Count
GO:0003730	mRNA 3'-UTR binding	17/789	94/15290	5.48064e-06	0.00418173	0.00391145	Hnrnpa2b1/Pabpc4/Trp53/Fmr1/Hnrnpd/Fxr1/Celf2/Serbp1/Ybx3/Pum2/Celf1/Ilf3/Hnrnpk/Angel2/Cpsf1/Rnps1/Hnrnpr	17
GO:0046974	histone methyltransferase activity (H3-K9 specific)	5/789	11/15290	0.000128614	0.0405933	0.0379696	Ehmt1/Suv39h2/Setd5/Ehmt2/Setdb1	5
GO:0003729	mRNA binding	31/789	299/15290	0.000174348	0.0405933	0.0379696	Hnrnpa2b1/Pabpc4/Pkm/Zc3h11a/Trp53/Rbm25/Fmr1/Hnrnpm/Hnrnpd/Fxr1/Myef2/Celf2/Serbp1/Lsm14a/Ybx3/Fubp1/Rbm5/Pum2/Celf1/Eif4g3/Poldip3/Ptbp1/Ilf3/Hnrnpk/Angel2/Cpsf1/Rnps1/Hnrnpr/Luc7l2/Mvk/Ptbp2	31
GO:0008175	tRNA methyltransferase activity	8/789	33/15290	0.000212809	0.0405933	0.0379696	Mettl8/Alkbh8/Trmt13/Trmt61a/Trmt2a/Trmt11/Trmt10b/Trmt2b	8
GO:0008168	methyltransferase activity	21/789	187/15290	0.00066697	0.0950037	0.0888633	Mettl8/Alkbh8/Setd3/Trmt13/Ehmt1/Suv39h2/Mtr/Mettl4/Comt/Nsd3/Setd5/Trmt61a/Kmt5b/Etfbkmt/Ehmt2/Setdb1/Trmt2a/Trmt11/Mettl17/Trmt10b/Trmt2b	21
GO:0140030	modification-dependent protein binding	19/789	165/15290	0.00087189	0.0950037	0.0888633	Fmr1/Zmynd11/Hdgfl2/Kdm5a/Tnip1/Atrx/Bptf/Zranb3/Tab2/Setd5/Yeats2/Optn/Pml/Glyr1/Mindy1/Trim24/Ubqln1/Sharpin/Zcwpw1	19
GO:0019783	ubiquitin-like protein peptidase activity	14/789	104/15290	0.000894733	0.0950037	0.0888633	Senp6/Usp3/Alg13/Senp2/Senp1/Ufsp2/Usp33/Usp1/Usp37/Zup1/Usp45/Mindy1/Mindy3/Mysm1	14
GO:0018024	histone-lysine N-methyltransferase activity	8/789	42/15290	0.00119955	0.0950037	0.0888633	Setd3/Ehmt1/Suv39h2/Nsd3/Setd5/Kmt5b/Ehmt2/Setdb1	8
GO:0061980	regulatory RNA binding	8/789	42/15290	0.00119955	0.0950037	0.0888633	Hnrnpa2b1/Fmr1/Tut4/Pum2/Fam172a/Tarbp2/Tut7/Zfp346	8
GO:0008757	S-adenosylmethionine-dependent methyltransferase activity	17/789	145/15290	0.0013087	0.0950037	0.0888633	Mettl8/Setd3/Ehmt1/Suv39h2/Mettl4/Comt/Nsd3/Setd5/Trmt61a/Kmt5b/Etfbkmt/Ehmt2/Setdb1/Trmt2a/Trmt11/Trmt10b/Trmt2b	17
GO:0016741	transferase activity, transferring one-carbon groups	21/789	199/15290	0.00148243	0.0950037	0.0888633	Mettl8/Alkbh8/Setd3/Trmt13/Ehmt1/Suv39h2/Mtr/Mettl4/Comt/Nsd3/Setd5/Trmt61a/Kmt5b/Etfbkmt/Ehmt2/Setdb1/Trmt2a/Trmt11/Mettl17/Trmt10b/Trmt2b	21
GO:0004842	ubiquitin-protein transferase activity	34/789	386/15290	0.00167341	0.0950037	0.0888633	Med24/Ttc3/Ube2w/G2e3/Mefv/Rnf138/Chfr/Trip12/Rnf214/Bcor/Trim33/Birc6/Ube4a/Rnf216/Ccnc/Rnf111/Huwe1/Znrf1/Rnf8/Rnf149/Trim37/Zfp91/Ubr2/Marchf2/Rnf44/Rnf14/Pml/Peli2/Traf7/Trim24/Sharpin/Ube2j1/Fbxw11/Trim11	34
GO:0008234	cysteine-type peptidase activity	17/789	149/15290	0.00176368	0.0950037	0.0888633	Senp6/Usp3/Alg13/Senp2/Senp1/Ufsp2/Capn7/Usp33/Usp1/Usp37/Zup1/Usp45/Mindy1/Atg4d/Casp8/Mindy3/Mysm1	17
GO:0036002	pre-mRNA binding	7/789	35/15290	0.00179499	0.0950037	0.0888633	Hnrnpa2b1/Celf2/Celf1/Ptbp1/Hnrnpk/Snrpc/Rbm7	7
GO:0019787	ubiquitin-like protein transferase activity	35/789	406/15290	0.00207212	0.0950037	0.0888633	Med24/Ttc3/Ube2w/G2e3/Mefv/Rnf138/Chfr/Trip12/Rnf214/Bcor/Trim33/Birc6/Ube4a/Rnf216/Ccnc/Rnf111/Huwe1/Znrf1/Rnf8/Ufl1/Rnf149/Trim37/Zfp91/Ubr2/Marchf2/Rnf44/Rnf14/Pml/Peli2/Traf7/Trim24/Sharpin/Ube2j1/Fbxw11/Trim11	35
GO:0016278	lysine N-methyltransferase activity	9/789	56/15290	0.00211673	0.0950037	0.0888633	Setd3/Ehmt1/Suv39h2/Nsd3/Setd5/Kmt5b/Etfbkmt/Ehmt2/Setdb1	9
GO:0016279	protein-lysine N-methyltransferase activity	9/789	56/15290	0.00211673	0.0950037	0.0888633	Setd3/Ehmt1/Suv39h2/Nsd3/Setd5/Kmt5b/Etfbkmt/Ehmt2/Setdb1	9
GO_CC	Description	GeneRatio	BgRatio	pvalue	p.adjust	qvalue	geneID	Count
GO:1902562	H4 histone acetyltransferase complex	10/790	40/15461	2.3978e-05	0.0134037	0.01315	Morf4l2/Kansl1l/Ogt/Meaf6/Atf2/Phf20l1/Yeats2/Hcfc1/Ep400/Kansl2	10
GO:0031248	protein acetyltransferase complex	15/790	97/15461	0.000113827	0.0138165	0.013555	Morf4l2/Kansl1l/Map3k7/Ogt/Meaf6/Supt20/Atf2/Phf20l1/Brd1/Yeats2/Hcfc1/Ep400/Atxn7/Kansl2/Naa16	15
GO:1902493	acetyltransferase complex	15/790	97/15461	0.000113827	0.0138165	0.013555	Morf4l2/Kansl1l/Map3k7/Ogt/Meaf6/Supt20/Atf2/Phf20l1/Brd1/Yeats2/Hcfc1/Ep400/Atxn7/Kansl2/Naa16	15
GO:0044545	NSL complex	5/790	11/15461	0.000122751	0.0138165	0.013555	Kansl1l/Ogt/Phf20l1/Hcfc1/Kansl2	5
GO:0000123	histone acetyltransferase complex	14/790	88/15461	0.000139916	0.0138165	0.013555	Morf4l2/Kansl1l/Map3k7/Ogt/Meaf6/Supt20/Atf2/Phf20l1/Brd1/Yeats2/Hcfc1/Ep400/Atxn7/Kansl2	14
GO:0016592	mediator complex	9/790	40/15461	0.000148299	0.0138165	0.013555	Med24/Cdk19/Ccnc/Bclaf1/Cdk9/Med12l/Med13l/Med8/Bclaf3	9
GO:0036464	cytoplasmic ribonucleoprotein granule	24/790	219/15461	0.000355175	0.0283633	0.0278265	Hnrnpa2b1/Mbnl1/Pabpc4/Pan3/Fmr1/Fxr1/Usp3/Lsm14a/Nbdy/Tut4/Pum2/Cnot2/Xrn1/Celf1/Poldip3/Hnrnpk/Tnrc6c/Edc4/Htt/Cdk9/Atxn2l/Endov/Gabpb1/Tnrc6a	24
GO:0035770	ribonucleoprotein granule	25/790	237/15461	0.000481669	0.0336566	0.0330197	Hnrnpa2b1/Mbnl1/Pabpc4/Pan3/Fmr1/Fxr1/Usp3/Lsm14a/Nbdy/Tut4/Pum2/Cnot2/Xrn1/Celf1/Poldip3/Hnrnpk/Tnrc6c/Edc4/Htt/Cdk9/Dhx30/Atxn2l/Endov/Gabpb1/Tnrc6a	25

## Sheet: KL_S34F_uniq_DSG_GO
GO_BP	Description	GeneRatio	BgRatio	pvalue	p.adjust	qvalue	geneID	Count
GO:0016570	histone modification	39/609	440/15307	2.52485e-06	0.0109174	0.0106841	Jmjd1c/Trp53/Morf4l2/Hpf1/Map3k7/Brms1l/Mta1/Kdm3b/Usp3/Meaf6/Kdm6a/Ehmt1/Supt20/Suv39h2/App/Huwe1/Rif1/Arid4b/Atf2/Kdm5a/Rnf8/Atrx/Trim37/Nsd3/Brd1/Hcfc1/Kmt5b/Pml/Asxl2/Cdk9/Glyr1/Ehmt2/Ncor1/Hdac7/Setdb1/Ep400/Atxn7/Kansl2/Mysm1	39
GO:1903311	regulation of mRNA metabolic process	26/609	277/15307	4.5956e-05	0.0993568	0.0972331	Hnrnpa2b1/Mbnl1/Papola/Hnrnpm/Hnrnpd/Fxr1/Mbnl3/Myef2/Celf2/Tut4/Sltm/Csde1/Pum2/Ptbp1/Safb2/Hnrnpk/Tnrc6c/Angel2/Fam172a/Tut7/Cdk9/Rnasel/Rnps1/Hnrnpr/Rbm7/Tnrc6a	26
GO_MF	Description	GeneRatio	BgRatio	pvalue	p.adjust	qvalue	geneID	Count
GO:0003730	mRNA 3'-UTR binding	14/601	94/15290	1.72813e-05	0.0123388	0.0115512	Hnrnpa2b1/Trp53/Hnrnpd/Fxr1/Celf2/Serbp1/Ybx3/Pum2/Ilf3/Hnrnpk/Angel2/Cpsf1/Rnps1/Hnrnpr	14
GO_CC	Description	GeneRatio	BgRatio	pvalue	p.adjust	qvalue	geneID	Count
GO:0016592	mediator complex	8/603	40/15461	0.000130106	0.0649235	0.0639011	Cdk19/Ccnc/Bclaf1/Cdk9/Med12l/Med13l/Med8/Bclaf3	8
GO:0031248	protein acetyltransferase complex	12/603	97/15461	0.000383407	0.0649235	0.0639011	Morf4l2/Kansl1l/Map3k7/Meaf6/Supt20/Atf2/Brd1/Hcfc1/Ep400/Atxn7/Kansl2/Naa16	12
GO:1902493	acetyltransferase complex	12/603	97/15461	0.000383407	0.0649235	0.0639011	Morf4l2/Kansl1l/Map3k7/Meaf6/Supt20/Atf2/Brd1/Hcfc1/Ep400/Atxn7/Kansl2/Naa16	12
GO:0000123	histone acetyltransferase complex	11/603	88/15461	0.000607842	0.0771959	0.0759802	Morf4l2/Kansl1l/Map3k7/Meaf6/Supt20/Atf2/Brd1/Hcfc1/Ep400/Atxn7/Kansl2	11
GO:1902562	H4 histone acetyltransferase complex	7/603	40/15461	0.000805012	0.0817892	0.0805012	Morf4l2/Kansl1l/Meaf6/Atf2/Hcfc1/Ep400/Kansl2	7

## Sheet: KL_Q157R_DSG_GO
GO_BP	Description	GeneRatio	BgRatio	pvalue	p.adjust	qvalue	geneID	Count
GO:0006397	mRNA processing	32/464	437/15212	4.52323e-06	0.0169802	0.016755	Fmr1/Ddx46/Tia1/Rbm5/Prmt9/Celf1/Hnrnph1/Srek1/Rbm39/Luc7l2/Srsf6/Cpsf4/Zfp326/Ern1/Srsf5/Scaf4/Zc3h14/Srpk1/Clasrp/Dyrk1a/Fip1l1/Qki/Rsrc1/Scnm1/Thrap3/Zranb2/Rbm26/Rbm25/Pan3/Rprd1a/Snrnp48/Dbr1	32
GO:0043484	regulation of RNA splicing	17/464	168/15212	1.5214e-05	0.0285566	0.0281778	Fmr1/Tia1/Rbm5/Hnrnph2/Celf1/Hnrnph1/Rbm39/Srsf6/Zfp326/Ern1/Srsf5/Clk1/Dyrk1a/Qki/Thrap3/Rbm25/Ccnl2	17
GO:0000380	alternative mRNA splicing, via spliceosome	10/464	72/15212	6.23469e-05	0.0744548	0.0734673	Fmr1/Tia1/Rbm5/Celf1/Srsf6/Dyrk1a/Rsrc1/Scnm1/Thrap3/Rbm25	10
GO:0008380	RNA splicing	27/464	394/15212	7.93338e-05	0.0744548	0.0734673	Fmr1/Ddx46/Tia1/Rbm5/Hnrnph2/Celf1/Hnrnph1/Srek1/Rbm39/Luc7l2/Srsf6/Zfp326/Ern1/Srsf5/Srpk1/Clasrp/Clk1/Dyrk1a/Qki/Rsrc1/Scnm1/Thrap3/Zranb2/Rbm25/Ccnl2/Snrnp48/Dbr1	27
GO:0006303	double-strand break repair via nonhomologous end joining	9/464	63/15212	0.000115902	0.0870189	0.0858648	Wrap53/Kdm2a/Smarcal1/Iffo1/Dclre1c/Paxx/Parp3/Mlh1/Dclre1b	9
GO_MF	Description	GeneRatio	BgRatio	pvalue	p.adjust	qvalue	geneID	Count
NA
GO_CC	Description	GeneRatio	BgRatio	pvalue	p.adjust	qvalue	geneID	Count
GO:0016607	nuclear speck	24/469	329/15363	7.65599e-05	0.0376675	0.0353787	Ddx46/Dgkq/Srek1/Rbm39/Luc7l2/Srsf6/Hif1a/Surf2/Srsf5/Zc3h14/Srpk1/Zbtb18/Poli/Ilrun/Dyrk1a/Rsrc1/Scnm1/Smc5/Thrap3/Hp1bp3/Rbm25/Trip12/Poldip3/Atp6v0a1	24

## Sheet: KL_Q157R_uniq_DSG_GO
GO_BP	Description	GeneRatio	BgRatio	pvalue	p.adjust	qvalue	geneID	Count
GO:0006303	double-strand break repair via nonhomologous end joining	8/277	63/15212	1.77745e-05	0.0542123	0.0533048	Wrap53/Kdm2a/Smarcal1/Dclre1c/Paxx/Parp3/Mlh1/Dclre1b	8
GO_MF	Description	GeneRatio	BgRatio	pvalue	p.adjust	qvalue	geneID	Count
NA
GO_CC	Description	GeneRatio	BgRatio	pvalue	p.adjust	qvalue	geneID	Count
NA
