# Supplementary material for: U2af1S34F and U2af1Q157R myeloid neoplasm-associated hotspot mutations induce distinct hematopoietic phenotypes in mice
Source: Leukemia. 2026 May 6;40(7):1467–81. doi: 10.1038/s41375-026-02974-7 (PMC13276503; doi:10.1038/s41375-026-02974-7)
Supplement: Supplementary file 16 — Table S16 MDS-AML DSE [file 41375_2026_2974_MOESM16_ESM.xlsx]

## Sheet: MDS_Madan_S34F_DSE
Event_ID	delta_PSI	Event_ID_withdir
ENSG00000168385|SEPTIN2|chr2|+|SE|241316421|241316540|241315881|241315982|241317498|241317599	-0.416	ENSG00000168385|SEPTIN2|chr2|+|SE|241316421|241316540|241315881|241315982|241317498|241317599_DN
ENSG00000089157|RPLP0|chr12|-|A3SS|120200729|120200891|120200729|120200831|120201082|120201211	-0.41	ENSG00000089157|RPLP0|chr12|-|A3SS|120200729|120200891|120200729|120200831|120201082|120201211_DN
ENSG00000189159|JPT1|chr17|-|SE|75149090|75149185|75148528|75148671|75168233|75168261	-0.408	ENSG00000189159|JPT1|chr17|-|SE|75149090|75149185|75148528|75148671|75168233|75168261_DN
ENSG00000064607|SUGP2|chr19|-|SE|18991339|18991553|18990892|18991149|18994365|18994486	-0.39	ENSG00000064607|SUGP2|chr19|-|SE|18991339|18991553|18990892|18991149|18994365|18994486_DN
ENSG00000160058|BSDC1|chr1|-|RI|32394079|32394425|32394079|32394140|32394403|32394425	-0.389	ENSG00000160058|BSDC1|chr1|-|RI|32394079|32394425|32394079|32394140|32394403|32394425_DN
ENSG00000114062|UBE3A|chr15|-|SE|25408571|25408684|25407066|25407262|25409087|25409207	-0.38	ENSG00000114062|UBE3A|chr15|-|SE|25408571|25408684|25407066|25407262|25409087|25409207_DN
ENSG00000215301|DDX3X|chrX|+|SE|41339038|41339083|41337407|41337465|41341483|41341616	-0.372	ENSG00000215301|DDX3X|chrX|+|SE|41339038|41339083|41337407|41337465|41341483|41341616_DN
ENSG00000131373|HACL1|chr3|-|SE|15585247|15585342|15582876|15582989|15589539|15589612	-0.372	ENSG00000131373|HACL1|chr3|-|SE|15585247|15585342|15582876|15582989|15589539|15589612_DN
ENSG00000215301|DDX3X|chrX|+|SE|41337690|41339083|41337407|41337465|41341483|41341616	-0.368	ENSG00000215301|DDX3X|chrX|+|SE|41337690|41339083|41337407|41337465|41341483|41341616_DN
ENSG00000110203|FOLR3|chr11|+|RI|72138960|72139149|72138960|72139110|72139112|72139149	-0.359	ENSG00000110203|FOLR3|chr11|+|RI|72138960|72139149|72138960|72139110|72139112|72139149_DN
ENSG00000269893|SNHG8|chr4|+|SE|118278943|118279137|118278757|118278792|118279388|118279431	-0.355	ENSG00000269893|SNHG8|chr4|+|SE|118278943|118279137|118278757|118278792|118279388|118279431_DN
ENSG00000129484|PARP2|chr14|+|A5SS|20344931|20345126|20344931|20345087|20345393|20345464	-0.352	ENSG00000129484|PARP2|chr14|+|A5SS|20344931|20345126|20344931|20345087|20345393|20345464_DN
ENSG00000009413|REV3L|chr6|-|SE|111460299|111460406|111416282|111416472|111472012|111472140	-0.346	ENSG00000009413|REV3L|chr6|-|SE|111460299|111460406|111416282|111416472|111472012|111472140_DN
ENSG00000269893|SNHG8|chr4|+|SE|118279106|118279137|118278754|118278792|118279388|118279431	-0.338	ENSG00000269893|SNHG8|chr4|+|SE|118279106|118279137|118278754|118278792|118279388|118279431_DN
ENSG00000198901|PRC1|chr15|-|SE|90969078|90969120|90966464|90966653|90969523|90969623	-0.336	ENSG00000198901|PRC1|chr15|-|SE|90969078|90969120|90966464|90966653|90969523|90969623_DN
ENSG00000103472|RRN3P2|chr16|+|A3SS|29097131|29097316|29097192|29097316|29096130|29096261	-0.336	ENSG00000103472|RRN3P2|chr16|+|A3SS|29097131|29097316|29097192|29097316|29096130|29096261_DN
ENSG00000197548|ATG7|chr3|+|SE|11282192|11282438|11272402|11272430|11298685|11298855	-0.334	ENSG00000197548|ATG7|chr3|+|SE|11282192|11282438|11272402|11272430|11298685|11298855_DN
ENSG00000269893|SNHG8|chr4|+|A5SS|118278708|118279137|118278708|118278792|118279388|118279431	-0.332	ENSG00000269893|SNHG8|chr4|+|A5SS|118278708|118279137|118278708|118278792|118279388|118279431_DN
ENSG00000114062|UBE3A|chr15|-|SE|25408619|25408684|25407066|25407262|25409087|25409207	-0.329	ENSG00000114062|UBE3A|chr15|-|SE|25408619|25408684|25407066|25407262|25409087|25409207_DN
ENSG00000265148|TSPOAP1-AS1|chr17|+|A3SS|58351734|58351914|58351743|58351914|58337447|58337679	-0.321	ENSG00000265148|TSPOAP1-AS1|chr17|+|A3SS|58351734|58351914|58351743|58351914|58337447|58337679_DN
ENSG00000164733|CTSB|chr8|-|MXE|11857857|11857940|11862344|11862478|11853328|11853479|11864375|11864463	-0.315	ENSG00000164733|CTSB|chr8|-|MXE|11857857|11857940|11862344|11862478|11853328|11853479|11864375|11864463_DN
ENSG00000105223|PLD3|chr19|+|SE|40365552|40365585|40348703|40348768|40366418|40366510	-0.314	ENSG00000105223|PLD3|chr19|+|SE|40365552|40365585|40348703|40348768|40366418|40366510_DN
ENSG00000143702|CEP170|chr1|-|A3SS|243156220|243156455|243156220|243156347|243164283|243166116	-0.312	ENSG00000143702|CEP170|chr1|-|A3SS|243156220|243156455|243156220|243156347|243164283|243166116_DN
ENSG00000153310|FAM49B|chr8|-|MXE|129879596|129879789|129896671|129896854|129879388|129879471|129903311|129903350	-0.311	ENSG00000153310|FAM49B|chr8|-|MXE|129879596|129879789|129896671|129896854|129879388|129879471|129903311|129903350_DN
ENSG00000101187|SLCO4A1|chr20|+|SE|62668157|62668184|62667869|62667910|62668476|62668541	-0.309	ENSG00000101187|SLCO4A1|chr20|+|SE|62668157|62668184|62667869|62667910|62668476|62668541_DN
ENSG00000008838|MED24|chr17|-|A3SS|40053468|40053657|40053468|40053635|40054360|40054405	-0.308	ENSG00000008838|MED24|chr17|-|A3SS|40053468|40053657|40053468|40053635|40054360|40054405_DN
ENSG00000164039|BDH2|chr4|-|RI|103085348|103086540|103085348|103085462|103085698|103086540	-0.307	ENSG00000164039|BDH2|chr4|-|RI|103085348|103086540|103085348|103085462|103085698|103086540_DN
ENSG00000115318|LOXL3|chr2|-|SE|74536708|74536928|74536290|74536471|74549368|74549583	-0.305	ENSG00000115318|LOXL3|chr2|-|SE|74536708|74536928|74536290|74536471|74549368|74549583_DN
ENSG00000111540|RAB5B|chr12|+|SE|55979371|55979474|55974083|55974139|55986868|55987123	-0.303	ENSG00000111540|RAB5B|chr12|+|SE|55979371|55979474|55974083|55974139|55986868|55987123_DN
ENSG00000120265|PCMT1|chr6|+|A3SS|149772013|149772247|149772047|149772247|149771161|149771266	-0.302	ENSG00000120265|PCMT1|chr6|+|A3SS|149772013|149772247|149772047|149772247|149771161|149771266_DN
ENSG00000151689|INPP1|chr2|+|MXE|190348887|190349031|190359645|190359698|190343929|190343961|190360038|190360306	-0.301	ENSG00000151689|INPP1|chr2|+|MXE|190348887|190349031|190359645|190359698|190343929|190343961|190360038|190360306_DN
ENSG00000168769|TET2|chr4|+|SE|105190359|105190505|105146785|105146979|105233896|105234272	-0.298	ENSG00000168769|TET2|chr4|+|SE|105190359|105190505|105146785|105146979|105233896|105234272_DN
ENSG00000215301|DDX3X|chrX|+|A5SS|41337407|41339083|41337407|41337465|41341483|41341616	-0.297	ENSG00000215301|DDX3X|chrX|+|A5SS|41337407|41339083|41337407|41337465|41341483|41341616_DN
ENSG00000188732|FAM221A|chr7|+|SE|23684498|23684672|23680129|23680283|23689268|23689459	-0.297	ENSG00000188732|FAM221A|chr7|+|SE|23684498|23684672|23680129|23680283|23689268|23689459_DN
ENSG00000183570|PCBP3|chr21|+|SE|45913950|45914025|45910901|45911030|45917587|45917629	-0.296	ENSG00000183570|PCBP3|chr21|+|SE|45913950|45914025|45910901|45911030|45917587|45917629_DN
ENSG00000117616|RSRP1|chr1|-|SE|25244453|25244498|25243549|25244224|25245149|25245301	-0.296	ENSG00000117616|RSRP1|chr1|-|SE|25244453|25244498|25243549|25244224|25245149|25245301_DN
ENSG00000214078|CPNE1|chr20|-|SE|35632162|35632248|35631944|35632025|35632310|35632385	-0.295	ENSG00000214078|CPNE1|chr20|-|SE|35632162|35632248|35631944|35632025|35632310|35632385_DN
ENSG00000114062|UBE3A|chr15|-|MXE|25407066|25407262|25408619|25408684|25405460|25405502|25409087|25409207	-0.295	ENSG00000114062|UBE3A|chr15|-|MXE|25407066|25407262|25408619|25408684|25405460|25405502|25409087|25409207_DN
ENSG00000131373|HACL1|chr3|-|SE|15574976|15575082|15573158|15573242|15579909|15580045	-0.288	ENSG00000131373|HACL1|chr3|-|SE|15574976|15575082|15573158|15573242|15579909|15580045_DN
ENSG00000183570|PCBP3|chr21|+|SE|45913950|45914094|45910901|45911030|45917587|45917629	-0.287	ENSG00000183570|PCBP3|chr21|+|SE|45913950|45914094|45910901|45911030|45917587|45917629_DN
ENSG00000173517|PEAK1|chr15|-|SE|77284957|77285078|77252366|77252526|77286422|77286504	-0.287	ENSG00000173517|PEAK1|chr15|-|SE|77284957|77285078|77252366|77252526|77286422|77286504_DN
ENSG00000170473|PYM1|chr12|-|SE|55914275|55914366|55903386|55903480|55927075|55927111	-0.283	ENSG00000170473|PYM1|chr12|-|SE|55914275|55914366|55903386|55903480|55927075|55927111_DN
ENSG00000163006|CCDC138|chr2|+|SE|108788031|108788089|108786756|108786915|108788851|108788966	-0.282	ENSG00000163006|CCDC138|chr2|+|SE|108788031|108788089|108786756|108786915|108788851|108788966_DN
ENSG00000117569|PTBP2|chr1|+|A3SS|96804784|96804939|96804799|96804939|96785058|96785254	-0.279	ENSG00000117569|PTBP2|chr1|+|A3SS|96804784|96804939|96804799|96804939|96785058|96785254_DN
ENSG00000168769|TET2|chr4|+|SE|105190359|105190486|105146292|105146979|105233896|105237351	-0.279	ENSG00000168769|TET2|chr4|+|SE|105190359|105190486|105146292|105146979|105233896|105237351_DN
ENSG00000142192|APP|chr21|-|SE|25997359|25997416|25982343|25982477|26021839|26022042	-0.278	ENSG00000142192|APP|chr21|-|SE|25997359|25997416|25982343|25982477|26021839|26022042_DN
ENSG00000175471|MCTP1|chr5|-|SE|94923961|94924021|94912805|94912976|94931952|94931991	-0.278	ENSG00000175471|MCTP1|chr5|-|SE|94923961|94924021|94912805|94912976|94931952|94931991_DN
ENSG00000169919|GUSB|chr7|-|SE|65979385|65979541|65975851|65976202|65980223|65980409	-0.277	ENSG00000169919|GUSB|chr7|-|SE|65979385|65979541|65975851|65976202|65980223|65980409_DN
ENSG00000105223|PLD3|chr19|+|A3SS|40365552|40365930|40365717|40365930|40348689|40348768	-0.276	ENSG00000105223|PLD3|chr19|+|A3SS|40365552|40365930|40365717|40365930|40348689|40348768_DN
ENSG00000198563|DDX39B|chr6|-|A3SS|31538762|31538939|31538762|31538855|31539146|31539274	-0.275	ENSG00000198563|DDX39B|chr6|-|A3SS|31538762|31538939|31538762|31538855|31539146|31539274_DN
ENSG00000123415|SMUG1|chr12|-|SE|54187818|54187905|54183655|54183959|54188950|54188974	-0.274	ENSG00000123415|SMUG1|chr12|-|SE|54187818|54187905|54183655|54183959|54188950|54188974_DN
ENSG00000174652|ZNF266|chr19|-|SE|9434064|9434235|9420064|9420218|9434797|9434859	-0.274	ENSG00000174652|ZNF266|chr19|-|SE|9434064|9434235|9420064|9420218|9434797|9434859_DN
ENSG00000078618|NRDC|chr1|-|SE|51837486|51837620|51836368|51836438|51840225|51840514	-0.266	ENSG00000078618|NRDC|chr1|-|SE|51837486|51837620|51836368|51836438|51840225|51840514_DN
ENSG00000139370|SLC15A4|chr12|-|A3SS|128809942|128810111|128809942|128810053|128814774|128815070	-0.266	ENSG00000139370|SLC15A4|chr12|-|A3SS|128809942|128810111|128809942|128810053|128814774|128815070_DN
ENSG00000187017|ESPN|chr1|+|SE|6450443|6450470|6449054|6449091|6451602|6451748	-0.265	ENSG00000187017|ESPN|chr1|+|SE|6450443|6450470|6449054|6449091|6451602|6451748_DN
ENSG00000143622|RIT1|chr1|-|SE|155910655|155910804|155910449|155910506|155911242|155911344	-0.265	ENSG00000143622|RIT1|chr1|-|SE|155910655|155910804|155910449|155910506|155911242|155911344_DN
ENSG00000168237|GLYCTK|chr3|+|SE|52290303|52290719|52287819|52287876|52290959|52291111	-0.264	ENSG00000168237|GLYCTK|chr3|+|SE|52290303|52290719|52287819|52287876|52290959|52291111_DN
ENSG00000214078|CPNE1|chr20|-|A5SS|35632162|35632385|35632310|35632385|35631944|35632025	-0.263	ENSG00000214078|CPNE1|chr20|-|A5SS|35632162|35632385|35632310|35632385|35631944|35632025_DN
ENSG00000102897|LYRM1|chr16|+|SE|20902485|20902717|20900665|20900889|20915555|20915714	-0.263	ENSG00000102897|LYRM1|chr16|+|SE|20902485|20902717|20900665|20900889|20915555|20915714_DN
ENSG00000167483|FAM129C|chr19|+|SE|17530754|17530816|17527290|17527395|17532262|17532388	-0.26	ENSG00000167483|FAM129C|chr19|+|SE|17530754|17530816|17527290|17527395|17532262|17532388_DN
ENSG00000197857|ZNF44|chr19|-|SE|12293231|12293375|12275955|12276082|12294691|12294794	-0.26	ENSG00000197857|ZNF44|chr19|-|SE|12293231|12293375|12275955|12276082|12294691|12294794_DN
ENSG00000171456|ASXL1|chr20|+|SE|32371777|32371874|32369014|32369123|32372163|32372223	-0.259	ENSG00000171456|ASXL1|chr20|+|SE|32371777|32371874|32369014|32369123|32372163|32372223_DN
ENSG00000151876|FBXO4|chr5|+|SE|41939440|41939616|41934132|41934308|41941191|41941743	-0.258	ENSG00000151876|FBXO4|chr5|+|SE|41939440|41939616|41934132|41934308|41941191|41941743_DN
ENSG00000250571|GLI4|chr8|+|A3SS|143274703|143274802|143274719|143274802|143269357|143269520	-0.258	ENSG00000250571|GLI4|chr8|+|A3SS|143274703|143274802|143274719|143274802|143269357|143269520_DN
ENSG00000162711|NLRP3|chr1|+|SE|247429584|247429755|247423846|247425599|247434102|247434273	-0.257	ENSG00000162711|NLRP3|chr1|+|SE|247429584|247429755|247423846|247425599|247434102|247434273_DN
ENSG00000166579|NDEL1|chr17|+|MXE|8444623|8444742|8444953|8445040|8444259|8444357|8445710|8445864	-0.256	ENSG00000166579|NDEL1|chr17|+|MXE|8444623|8444742|8444953|8445040|8444259|8444357|8445710|8445864_DN
ENSG00000197121|PGAP1|chr2|-|SE|196864986|196865080|196847002|196848037|196870940|196870979	-0.256	ENSG00000197121|PGAP1|chr2|-|SE|196864986|196865080|196847002|196848037|196870940|196870979_DN
ENSG00000165699|TSC1|chr9|-|A5SS|132911409|132911568|132911452|132911568|132911001|132911113	-0.256	ENSG00000165699|TSC1|chr9|-|A5SS|132911409|132911568|132911452|132911568|132911001|132911113_DN
ENSG00000165801|ARHGEF40|chr14|+|RI|21087000|21087463|21087000|21087105|21087319|21087463	-0.254	ENSG00000165801|ARHGEF40|chr14|+|RI|21087000|21087463|21087000|21087105|21087319|21087463_DN
ENSG00000173915|ATP5MD|chr10|-|SE|103395745|103396032|103394198|103394394|103396408|103396441	-0.254	ENSG00000173915|ATP5MD|chr10|-|SE|103395745|103396032|103394198|103394394|103396408|103396441_DN
ENSG00000186431|FCAR|chr19|+|A5SS|54888006|54888294|54888006|54888228|54889648|54889863	-0.254	ENSG00000186431|FCAR|chr19|+|A5SS|54888006|54888294|54888006|54888228|54889648|54889863_DN
ENSG00000256525|POLG2|chr17|-|A3SS|64482918|64482999|64482918|64482974|64485727|64485868	-0.254	ENSG00000256525|POLG2|chr17|-|A3SS|64482918|64482999|64482918|64482974|64485727|64485868_DN
ENSG00000153310|FAM49B|chr8|-|MXE|129879596|129879789|129896748|129896854|129879388|129879471|129903311|129903350	-0.249	ENSG00000153310|FAM49B|chr8|-|MXE|129879596|129879789|129896748|129896854|129879388|129879471|129903311|129903350_DN
ENSG00000204344|STK19|chr6|+|A3SS|31979413|31980548|31980450|31980548|31978902|31978998	-0.249	ENSG00000204344|STK19|chr6|+|A3SS|31979413|31980548|31980450|31980548|31978902|31978998_DN
ENSG00000169919|GUSB|chr7|-|SE|65974918|65975071|65974525|65974704|65976014|65976202	-0.247	ENSG00000169919|GUSB|chr7|-|SE|65974918|65975071|65974525|65974704|65976014|65976202_DN
ENSG00000149554|CHEK1|chr11|+|SE|125627606|125627830|125626557|125626833|125629231|125629296	-0.245	ENSG00000149554|CHEK1|chr11|+|SE|125627606|125627830|125626557|125626833|125629231|125629296_DN
ENSG00000241404|EGFL8|chr6|+|A3SS|32167086|32167257|32167146|32167257|32166909|32167005	-0.242	ENSG00000241404|EGFL8|chr6|+|A3SS|32167086|32167257|32167146|32167257|32166909|32167005_DN
ENSG00000196476|C20orf96|chr20|-|SE|289558|289676|283962|284081|290258|290307	-0.241	ENSG00000196476|C20orf96|chr20|-|SE|289558|289676|283962|284081|290258|290307_DN
ENSG00000181450|ZNF678|chr1|+|SE|227582513|227582606|227563542|227563724|227646543|227646670	-0.24	ENSG00000181450|ZNF678|chr1|+|SE|227582513|227582606|227563542|227563724|227646543|227646670_DN
ENSG00000239382|ALKBH6|chr19|-|SE|36013513|36013588|36013343|36013422|36014174|36014227	-0.239	ENSG00000239382|ALKBH6|chr19|-|SE|36013513|36013588|36013343|36013422|36014174|36014227_DN
ENSG00000100211|CBY1|chr22|+|SE|38665545|38665685|38656650|38656750|38668016|38668132	-0.239	ENSG00000100211|CBY1|chr22|+|SE|38665545|38665685|38656650|38656750|38668016|38668132_DN
ENSG00000119787|ATL2|chr2|-|SE|38354066|38354177|38318884|38319019|38377142|38377262	-0.238	ENSG00000119787|ATL2|chr2|-|SE|38354066|38354177|38318884|38319019|38377142|38377262_DN
ENSG00000130816|DNMT1|chr19|-|A3SS|10180349|10180569|10180349|10180529|10180777|10180885	-0.237	ENSG00000130816|DNMT1|chr19|-|A3SS|10180349|10180569|10180349|10180529|10180777|10180885_DN
ENSG00000137822|TUBGCP4|chr15|+|SE|43403682|43403842|43401817|43401850|43404412|43404552	-0.237	ENSG00000137822|TUBGCP4|chr15|+|SE|43403682|43403842|43401817|43401850|43404412|43404552_DN
ENSG00000198482|ZNF808|chr19|+|SE|52547511|52547638|52543265|52543347|52553106|52553166	-0.236	ENSG00000198482|ZNF808|chr19|+|SE|52547511|52547638|52543265|52543347|52553106|52553166_DN
ENSG00000220804|LINC01881|chr2|+|SE|242116182|242116232|242114638|242114741|242118964|242119057	-0.235	ENSG00000220804|LINC01881|chr2|+|SE|242116182|242116232|242114638|242114741|242118964|242119057_DN
ENSG00000100949|RABGGTA|chr14|-|RI|24270836|24271169|24270836|24270998|24271112|24271169	-0.235	ENSG00000100949|RABGGTA|chr14|-|RI|24270836|24271169|24270836|24270998|24271112|24271169_DN
ENSG00000215301|DDX3X|chrX|+|SE|41339035|41339083|41337407|41337465|41341483|41341494	-0.234	ENSG00000215301|DDX3X|chrX|+|SE|41339035|41339083|41337407|41337465|41341483|41341494_DN
ENSG00000152127|MGAT5|chr2|+|SE|134253094|134253218|134119982|134120291|134254261|134254644	-0.234	ENSG00000152127|MGAT5|chr2|+|SE|134253094|134253218|134119982|134120291|134254261|134254644_DN
ENSG00000064012|CASP8|chr2|+|A3SS|201266460|201266791|201266486|201266791|201234015|201234112	-0.233	ENSG00000064012|CASP8|chr2|+|A3SS|201266460|201266791|201266486|201266791|201234015|201234112_DN
ENSG00000101236|RNF24|chr20|-|SE|3974331|3974400|3963874|3964024|4015436|4015545	-0.232	ENSG00000101236|RNF24|chr20|-|SE|3974331|3974400|3963874|3964024|4015436|4015545_DN
ENSG00000062194|GPBP1|chr5|+|A3SS|57249408|57249576|57249453|57249576|57247074|57247215	-0.23	ENSG00000062194|GPBP1|chr5|+|A3SS|57249408|57249576|57249453|57249576|57247074|57247215_DN
ENSG00000109107|ALDOC|chr17|-|SE|28575964|28576020|28575420|28575544|28576800|28576948	-0.229	ENSG00000109107|ALDOC|chr17|-|SE|28575964|28576020|28575420|28575544|28576800|28576948_DN
ENSG00000160352|ZNF714|chr19|+|SE|21083977|21084069|21082173|21082348|21098184|21098311	-0.229	ENSG00000160352|ZNF714|chr19|+|SE|21083977|21084069|21082173|21082348|21098184|21098311_DN
ENSG00000162419|GMEB1|chr1|+|A3SS|28690073|28690186|28690103|28690186|28683582|28683740	-0.228	ENSG00000162419|GMEB1|chr1|+|A3SS|28690073|28690186|28690103|28690186|28683582|28683740_DN
ENSG00000114062|UBE3A|chr15|-|SE|25411907|25411971|25405460|25405502|25438488|25438513	-0.228	ENSG00000114062|UBE3A|chr15|-|SE|25411907|25411971|25405460|25405502|25438488|25438513_DN
ENSG00000137965|IFI44|chr1|+|SE|78660553|78660654|78659311|78659483|78662703|78662756	-0.227	ENSG00000137965|IFI44|chr1|+|SE|78660553|78660654|78659311|78659483|78662703|78662756_DN
ENSG00000228409|CCT6P1|chr7|+|SE|65761645|65761748|65760423|65760556|65762946|65763020	-0.226	ENSG00000228409|CCT6P1|chr7|+|SE|65761645|65761748|65760423|65760556|65762946|65763020_DN
ENSG00000067066|SP100|chr2|+|A3SS|230473323|230473440|230473383|230473440|230470014|230470098	-0.226	ENSG00000067066|SP100|chr2|+|A3SS|230473323|230473440|230473383|230473440|230470014|230470098_DN
ENSG00000169519|METTL15|chr11|+|A3SS|28296752|28296931|28296796|28296931|28290205|28290397	-0.224	ENSG00000169519|METTL15|chr11|+|A3SS|28296752|28296931|28296796|28296931|28290205|28290397_DN
ENSG00000117625|RCOR3|chr1|+|SE|211312354|211312487|211304010|211304140|211312719|211312819	-0.223	ENSG00000117625|RCOR3|chr1|+|SE|211312354|211312487|211304010|211304140|211312719|211312819_DN
ENSG00000121749|TBC1D15|chr12|+|MXE|71841100|71841231|71861404|71861496|71839758|71839811|71872069|71872168	-0.223	ENSG00000121749|TBC1D15|chr12|+|MXE|71841100|71841231|71861404|71861496|71839758|71839811|71872069|71872168_DN
ENSG00000127914|AKAP9|chr7|+|SE|92042045|92042186|92040673|92040898|92042667|92042771	-0.222	ENSG00000127914|AKAP9|chr7|+|SE|92042045|92042186|92040673|92040898|92042667|92042771_DN
ENSG00000275832|ARHGAP23|chr17|+|RI|38477578|38477896|38477578|38477705|38477827|38477896	-0.222	ENSG00000275832|ARHGAP23|chr17|+|RI|38477578|38477896|38477578|38477705|38477827|38477896_DN
ENSG00000049323|LTBP1|chr2|+|A3SS|33257283|33257511|33257442|33257511|33252676|33252844	-0.222	ENSG00000049323|LTBP1|chr2|+|A3SS|33257283|33257511|33257442|33257511|33252676|33252844_DN
ENSG00000105173|CCNE1|chr19|+|SE|29821995|29822130|29821721|29821817|29822239|29822351	-0.221	ENSG00000105173|CCNE1|chr19|+|SE|29821995|29822130|29821721|29821817|29822239|29822351_DN
ENSG00000124151|NCOA3|chr20|+|A3SS|47639576|47639822|47639621|47639822|47639007|47639202	-0.221	ENSG00000124151|NCOA3|chr20|+|A3SS|47639576|47639822|47639621|47639822|47639007|47639202_DN
ENSG00000138750|NUP54|chr4|-|SE|76136185|76136412|76134174|76134362|76144148|76144292	-0.221	ENSG00000138750|NUP54|chr4|-|SE|76136185|76136412|76134174|76134362|76144148|76144292_DN
ENSG00000109046|WSB1|chr17|+|SE|27301787|27301956|27294079|27294435|27303366|27303411	-0.221	ENSG00000109046|WSB1|chr17|+|SE|27301787|27301956|27294079|27294435|27303366|27303411_DN
ENSG00000165304|MELK|chr9|+|SE|36657240|36657363|36651745|36651877|36665349|36665581	-0.22	ENSG00000165304|MELK|chr9|+|SE|36657240|36657363|36651745|36651877|36665349|36665581_DN
ENSG00000158411|MITD1|chr2|-|SE|99171342|99171429|99170534|99170652|99171509|99171646	-0.22	ENSG00000158411|MITD1|chr2|-|SE|99171342|99171429|99170534|99170652|99171509|99171646_DN
ENSG00000156931|VPS8|chr3|+|SE|184922428|184922483|184920126|184920198|184924861|184924981	-0.22	ENSG00000156931|VPS8|chr3|+|SE|184922428|184922483|184920126|184920198|184924861|184924981_DN
ENSG00000102878|HSF4|chr16|+|MXE|67167474|67167599|67167823|67167947|67167119|67167222|67168830|67168936	-0.219	ENSG00000102878|HSF4|chr16|+|MXE|67167474|67167599|67167823|67167947|67167119|67167222|67168830|67168936_DN
ENSG00000086730|LAT2|chr7|+|SE|74214821|74214940|74210005|74210088|74215946|74216069	-0.219	ENSG00000086730|LAT2|chr7|+|SE|74214821|74214940|74210005|74210088|74215946|74216069_DN
ENSG00000196313|POM121|chr7|+|SE|72913764|72913828|72890932|72891110|72926261|72926477	-0.219	ENSG00000196313|POM121|chr7|+|SE|72913764|72913828|72890932|72891110|72926261|72926477_DN
ENSG00000115661|STK16|chr2|+|A5SS|219245478|219245796|219245478|219245522|219245895|219246085	-0.218	ENSG00000115661|STK16|chr2|+|A5SS|219245478|219245796|219245478|219245522|219245895|219246085_DN
ENSG00000166004|CEP295|chr11|+|A5SS|93695496|93695673|93695496|93695634|93696319|93696417	-0.216	ENSG00000166004|CEP295|chr11|+|A5SS|93695496|93695673|93695496|93695634|93696319|93696417_DN
ENSG00000152689|RASGRP3|chr2|+|SE|33481182|33481304|33476622|33476707|33511811|33511842	-0.216	ENSG00000152689|RASGRP3|chr2|+|SE|33481182|33481304|33476622|33476707|33511811|33511842_DN
ENSG00000203875|SNHG5|chr6|-|RI|85678135|85678736|85678135|85678188|85678693|85678736	-0.216	ENSG00000203875|SNHG5|chr6|-|RI|85678135|85678736|85678135|85678188|85678693|85678736_DN
ENSG00000183020|AP2A2|chr11|+|A3SS|985431|985582|985434|985582|984644|984753	-0.215	ENSG00000183020|AP2A2|chr11|+|A3SS|985431|985582|985434|985582|984644|984753_DN
ENSG00000166946|CCNDBP1|chr15|+|RI|43194080|43194461|43194080|43194137|43194414|43194461	-0.215	ENSG00000166946|CCNDBP1|chr15|+|RI|43194080|43194461|43194080|43194137|43194414|43194461_DN
ENSG00000137965|IFI44|chr1|+|SE|78660553|78660691|78659318|78659483|78662703|78662878	-0.215	ENSG00000137965|IFI44|chr1|+|SE|78660553|78660691|78659318|78659483|78662703|78662878_DN
ENSG00000163002|NUP35|chr2|+|SE|183151507|183151649|183133565|183133623|183157443|183157513	-0.215	ENSG00000163002|NUP35|chr2|+|SE|183151507|183151649|183133565|183133623|183157443|183157513_DN
ENSG00000111642|CHD4|chr12|-|A3SS|6578028|6578135|6578028|6578117|6578408|6578546	-0.214	ENSG00000111642|CHD4|chr12|-|A3SS|6578028|6578135|6578028|6578117|6578408|6578546_DN
ENSG00000160190|SLC37A1|chr21|+|SE|42514869|42514935|42514523|42514717|42518276|42518510	-0.214	ENSG00000160190|SLC37A1|chr21|+|SE|42514869|42514935|42514523|42514717|42518276|42518510_DN
ENSG00000163781|TOPBP1|chr3|-|A3SS|133652462|133652629|133652462|133652614|133653344|133653524	-0.214	ENSG00000163781|TOPBP1|chr3|-|A3SS|133652462|133652629|133652462|133652614|133653344|133653524_DN
ENSG00000109046|WSB1|chr17|+|SE|27301766|27301956|27294075|27294435|27303366|27303635	-0.214	ENSG00000109046|WSB1|chr17|+|SE|27301766|27301956|27294075|27294435|27303366|27303635_DN
ENSG00000109046|WSB1|chr17|+|SE|27301817|27301956|27294086|27294435|27303366|27303422	-0.214	ENSG00000109046|WSB1|chr17|+|SE|27301817|27301956|27294086|27294435|27303366|27303422_DN
ENSG00000071054|MAP4K4|chr2|+|SE|101860824|101860986|101859642|101859864|101863820|101864051	-0.213	ENSG00000071054|MAP4K4|chr2|+|SE|101860824|101860986|101859642|101859864|101863820|101864051_DN
ENSG00000179832|MROH1|chr8|+|SE|144242601|144242628|144242368|144242515|144243493|144243616	-0.213	ENSG00000179832|MROH1|chr8|+|SE|144242601|144242628|144242368|144242515|144243493|144243616_DN
ENSG00000174446|SNAPC5|chr15|-|SE|66495329|66495419|66493812|66494552|66497641|66497750	-0.213	ENSG00000174446|SNAPC5|chr15|-|SE|66495329|66495419|66493812|66494552|66497641|66497750_DN
ENSG00000158062|UBXN11|chr1|-|SE|26301693|26301722|26297961|26298062|26306591|26306620	-0.21	ENSG00000158062|UBXN11|chr1|-|SE|26301693|26301722|26297961|26298062|26306591|26306620_DN
ENSG00000162066|AMDHD2|chr16|+|RI|2528451|2528718|2528451|2528559|2528649|2528718	-0.209	ENSG00000162066|AMDHD2|chr16|+|RI|2528451|2528718|2528451|2528559|2528649|2528718_DN
ENSG00000166333|ILK|chr11|+|A3SS|6604179|6604360|6604225|6604360|6603730|6603822	-0.209	ENSG00000166333|ILK|chr11|+|A3SS|6604179|6604360|6604225|6604360|6603730|6603822_DN
ENSG00000064607|SUGP2|chr19|-|SE|18993647|18993740|18990889|18991149|18994365|18995280	-0.209	ENSG00000064607|SUGP2|chr19|-|SE|18993647|18993740|18990889|18991149|18994365|18995280_DN
ENSG00000122966|CIT|chr12|-|A3SS|119718698|119718861|119718698|119718816|119720477|119720585	-0.208	ENSG00000122966|CIT|chr12|-|A3SS|119718698|119718861|119718698|119718816|119720477|119720585_DN
ENSG00000111237|VPS29|chr12|-|SE|110498819|110498859|110496011|110496203|110502048|110502078	-0.208	ENSG00000111237|VPS29|chr12|-|SE|110498819|110498859|110496011|110496203|110502048|110502078_DN
ENSG00000100461|RBM23|chr14|-|SE|22905605|22905659|22905335|22905453|22906194|22906368	-0.207	ENSG00000100461|RBM23|chr14|-|SE|22905605|22905659|22905335|22905453|22906194|22906368_DN
ENSG00000174446|SNAPC5|chr15|-|SE|66494902|66495419|66493467|66494552|66497641|66497780	-0.207	ENSG00000174446|SNAPC5|chr15|-|SE|66494902|66495419|66493467|66494552|66497641|66497780_DN
ENSG00000278558|TMEM191B|chr22|+|RI|18529605|18530008|18529605|18529724|18529935|18530008	-0.207	ENSG00000278558|TMEM191B|chr22|+|RI|18529605|18530008|18529605|18529724|18529935|18530008_DN
ENSG00000122741|DCAF10|chr9|+|SE|37842088|37842286|37819287|37819401|37854779|37854982	-0.206	ENSG00000122741|DCAF10|chr9|+|SE|37842088|37842286|37819287|37819401|37854779|37854982_DN
ENSG00000107968|MAP3K8|chr10|+|SE|30437175|30437406|30433936|30434378|30438915|30439274	-0.206	ENSG00000107968|MAP3K8|chr10|+|SE|30437175|30437406|30433936|30434378|30438915|30439274_DN
ENSG00000174227|PIGG|chr4|+|SE|530435|530745|527038|527230|533817|533981	-0.206	ENSG00000174227|PIGG|chr4|+|SE|530435|530745|527038|527230|533817|533981_DN
ENSG00000139546|TARBP2|chr12|+|A3SS|53503712|53503808|53503729|53503808|53503026|53503212	-0.206	ENSG00000139546|TARBP2|chr12|+|A3SS|53503712|53503808|53503729|53503808|53503026|53503212_DN
ENSG00000075234|TTC38|chr22|+|SE|46292202|46292328|46289825|46289899|46292790|46292933	-0.205	ENSG00000075234|TTC38|chr22|+|SE|46292202|46292328|46289825|46289899|46292790|46292933_DN
ENSG00000108465|CDK5RAP3|chr17|+|RI|47971121|47971407|47971121|47971152|47971361|47971407	-0.204	ENSG00000108465|CDK5RAP3|chr17|+|RI|47971121|47971407|47971121|47971152|47971361|47971407_DN
ENSG00000148399|DPH7|chr9|-|SE|137577469|137577603|137576079|137576167|137578624|137578889	-0.204	ENSG00000148399|DPH7|chr9|-|SE|137577469|137577603|137576079|137576167|137578624|137578889_DN
ENSG00000152061|RABGAP1L|chr1|+|SE|174957890|174958173|174957456|174957549|174969276|174969387	-0.204	ENSG00000152061|RABGAP1L|chr1|+|SE|174957890|174958173|174957456|174957549|174969276|174969387_DN
ENSG00000141013|GAS8|chr16|+|A3SS|90031175|90031496|90031298|90031496|90027635|90027722	-0.203	ENSG00000141013|GAS8|chr16|+|A3SS|90031175|90031496|90031298|90031496|90027635|90027722_DN
ENSG00000162910|MRPL55|chr1|-|SE|228108436|228109021|228108113|228108318|228109260|228109290	-0.202	ENSG00000162910|MRPL55|chr1|-|SE|228108436|228109021|228108113|228108318|228109260|228109290_DN
ENSG00000163738|MTHFD2L|chr4|+|SE|74160054|74160088|74158107|74158281|74174505|74174690	-0.202	ENSG00000163738|MTHFD2L|chr4|+|SE|74160054|74160088|74158107|74158281|74174505|74174690_DN
ENSG00000122515|ZMIZ2|chr7|+|A3SS|44756974|44757149|44757042|44757149|44756424|44756539	-0.202	ENSG00000122515|ZMIZ2|chr7|+|A3SS|44756974|44757149|44757042|44757149|44756424|44756539_DN
ENSG00000283782|AC116366.3|chr5|+|MXE|132594868|132595044|132595103|132595201|132591876|132592034|132595572|132595810	-0.201	ENSG00000283782|AC116366.3|chr5|+|MXE|132594868|132595044|132595103|132595201|132591876|132592034|132595572|132595810_DN
ENSG00000251022|THAP9-AS1|chr4|-|SE|82895691|82895774|82893008|82894847|82900076|82900223	-0.201	ENSG00000251022|THAP9-AS1|chr4|-|SE|82895691|82895774|82893008|82894847|82900076|82900223_DN
ENSG00000173209|AHSA2P|chr2|+|RI|61185501|61186497|61185501|61185618|61186445|61186497	-0.2	ENSG00000173209|AHSA2P|chr2|+|RI|61185501|61186497|61185501|61185618|61186445|61186497_DN
ENSG00000088448|ANKRD10|chr13|-|SE|110894284|110894393|110894108|110894202|110906032|110906124	-0.199	ENSG00000088448|ANKRD10|chr13|-|SE|110894284|110894393|110894108|110894202|110906032|110906124_DN
ENSG00000228106|AL392172.1|chr1|+|SE|222827427|222827601|222823855|222823945|222835118|222835215	-0.198	ENSG00000228106|AL392172.1|chr1|+|SE|222827427|222827601|222823855|222823945|222835118|222835215_DN
ENSG00000237765|FAM200B|chr4|+|RI|15686235|15687148|15686235|15686462|15687000|15687148	-0.197	ENSG00000237765|FAM200B|chr4|+|RI|15686235|15687148|15686235|15686462|15687000|15687148_DN
ENSG00000137807|KIF23|chr15|+|SE|69439903|69440077|69438247|69438405|69444789|69445041	-0.197	ENSG00000137807|KIF23|chr15|+|SE|69439903|69440077|69438247|69438405|69444789|69445041_DN
ENSG00000089063|TMEM230|chr20|-|SE|5111763|5111808|5109331|5109445|5112742|5112904	-0.197	ENSG00000089063|TMEM230|chr20|-|SE|5111763|5111808|5109331|5109445|5112742|5112904_DN
ENSG00000161813|LARP4|chr12|+|SE|50453459|50453672|50441589|50441643|50454313|50454417	-0.196	ENSG00000161813|LARP4|chr12|+|SE|50453459|50453672|50441589|50441643|50454313|50454417_DN
ENSG00000064607|SUGP2|chr19|-|SE|18993637|18993740|18990887|18991149|18994365|18994486	-0.196	ENSG00000064607|SUGP2|chr19|-|SE|18993637|18993740|18990887|18991149|18994365|18994486_DN
ENSG00000196367|TRRAP|chr7|+|A5SS|98983263|98983492|98983263|98983459|98984092|98984358	-0.196	ENSG00000196367|TRRAP|chr7|+|A5SS|98983263|98983492|98983263|98983459|98984092|98984358_DN
ENSG00000140525|FANCI|chr15|+|SE|89306009|89306194|89305604|89305698|89307475|89307529	-0.195	ENSG00000140525|FANCI|chr15|+|SE|89306009|89306194|89305604|89305698|89307475|89307529_DN
ENSG00000186431|FCAR|chr19|+|SE|54888006|54888294|54885234|54885525|54889648|54889863	-0.194	ENSG00000186431|FCAR|chr19|+|SE|54888006|54888294|54885234|54885525|54889648|54889863_DN
ENSG00000027697|IFNGR1|chr6|-|A3SS|137206135|137206308|137206135|137206206|137206962|137207077	-0.194	ENSG00000027697|IFNGR1|chr6|-|A3SS|137206135|137206308|137206135|137206206|137206962|137207077_DN
ENSG00000117616|RSRP1|chr1|-|SE|25244453|25244498|25243549|25243633|25245149|25245301	-0.194	ENSG00000117616|RSRP1|chr1|-|SE|25244453|25244498|25243549|25243633|25245149|25245301_DN
ENSG00000064102|INTS13|chr12|-|SE|26914407|26914578|26913973|26914128|26916001|26916180	-0.193	ENSG00000064102|INTS13|chr12|-|SE|26914407|26914578|26913973|26914128|26916001|26916180_DN
ENSG00000197555|SIPA1L1|chr14|+|MXE|71400793|71400918|71413947|71414014|71321121|71321181|71512742|71512845	-0.193	ENSG00000197555|SIPA1L1|chr14|+|MXE|71400793|71400918|71413947|71414014|71321121|71321181|71512742|71512845_DN
ENSG00000050426|LETMD1|chr12|+|MXE|51053777|51053860|51055986|51056021|51049033|51049185|51056143|51056245	-0.192	ENSG00000050426|LETMD1|chr12|+|MXE|51053777|51053860|51055986|51056021|51049033|51049185|51056143|51056245_DN
ENSG00000105223|PLD3|chr19|+|SE|40365552|40365585|40348703|40348768|40365717|40365930	-0.192	ENSG00000105223|PLD3|chr19|+|SE|40365552|40365585|40348703|40348768|40365717|40365930_DN
ENSG00000132199|ENOSF1|chr18|-|A3SS|690548|690745|690548|690631|693881|693908	-0.191	ENSG00000132199|ENOSF1|chr18|-|A3SS|690548|690745|690548|690631|693881|693908_DN
ENSG00000133731|IMPA1|chr8|-|SE|81670938|81671047|81660513|81660667|81673840|81673949	-0.191	ENSG00000133731|IMPA1|chr8|-|SE|81670938|81671047|81660513|81660667|81673840|81673949_DN
ENSG00000183597|TANGO2|chr22|+|A5SS|20021068|20021246|20021068|20021134|20036759|20036854	-0.191	ENSG00000183597|TANGO2|chr22|+|A5SS|20021068|20021246|20021068|20021134|20036759|20036854_DN
ENSG00000183337|BCOR|chrX|-|A3SS|40063607|40063952|40063607|40063850|40064335|40064599	-0.19	ENSG00000183337|BCOR|chrX|-|A3SS|40063607|40063952|40063607|40063850|40064335|40064599_DN
ENSG00000165113|GKAP1|chr9|-|SE|83792950|83793017|83788600|83788678|83799184|83799328	-0.19	ENSG00000165113|GKAP1|chr9|-|SE|83792950|83793017|83788600|83788678|83799184|83799328_DN
ENSG00000093167|LRRFIP2|chr3|-|MXE|37066223|37066325|37072789|37072882|37065809|37065942|37075023|37075116	-0.19	ENSG00000093167|LRRFIP2|chr3|-|MXE|37066223|37066325|37072789|37072882|37065809|37065942|37075023|37075116_DN
ENSG00000157881|PANK4|chr1|-|A3SS|2510677|2510782|2510677|2510748|2511337|2511387	-0.19	ENSG00000157881|PANK4|chr1|-|A3SS|2510677|2510782|2510677|2510748|2511337|2511387_DN
ENSG00000155849|ELMO1|chr7|-|SE|36887559|36887672|36878009|36878117|36894853|36895017	-0.189	ENSG00000155849|ELMO1|chr7|-|SE|36887559|36887672|36878009|36878117|36894853|36895017_DN
ENSG00000079277|MKNK1|chr1|-|A5SS|46604184|46604294|46604226|46604294|46594112|46594280	-0.189	ENSG00000079277|MKNK1|chr1|-|A5SS|46604184|46604294|46604226|46604294|46594112|46594280_DN
ENSG00000132780|NASP|chr1|+|MXE|45594693|45594773|45600384|45600457|45591222|45591270|45602254|45602365	-0.189	ENSG00000132780|NASP|chr1|+|MXE|45594693|45594773|45600384|45600457|45591222|45591270|45602254|45602365_DN
ENSG00000213983|AP1G2|chr14|-|A5SS|23567596|23567783|23567738|23567783|23567110|23567319	-0.188	ENSG00000213983|AP1G2|chr14|-|A5SS|23567596|23567783|23567738|23567783|23567110|23567319_DN
ENSG00000175061|LRRC75A-AS1|chr17|+|A3SS|16439527|16439703|16439659|16439703|16439326|16439414	-0.188	ENSG00000175061|LRRC75A-AS1|chr17|+|A3SS|16439527|16439703|16439659|16439703|16439326|16439414_DN
ENSG00000162714|ZNF496|chr1|-|A3SS|247329188|247329615|247329188|247329568|247329965|247330081	-0.188	ENSG00000162714|ZNF496|chr1|-|A3SS|247329188|247329615|247329188|247329568|247329965|247330081_DN
ENSG00000151498|ACAD8|chr11|+|SE|134257087|134257257|134256547|134256648|134258514|134258624	-0.187	ENSG00000151498|ACAD8|chr11|+|SE|134257087|134257257|134256547|134256648|134258514|134258624_DN
ENSG00000214078|CPNE1|chr20|-|SE|35632162|35632234|35631944|35632025|35632310|35632385	-0.187	ENSG00000214078|CPNE1|chr20|-|SE|35632162|35632234|35631944|35632025|35632310|35632385_DN
ENSG00000108599|AKAP10|chr17|-|A3SS|19962839|19963022|19962839|19962991|19968413|19968461	-0.186	ENSG00000108599|AKAP10|chr17|-|A3SS|19962839|19963022|19962839|19962991|19968413|19968461_DN
ENSG00000132716|DCAF8|chr1|-|SE|160261284|160261350|160243959|160244034|160262448|160262528	-0.185	ENSG00000132716|DCAF8|chr1|-|SE|160261284|160261350|160243959|160244034|160262448|160262528_DN
ENSG00000154589|LY96|chr8|+|SE|74004795|74004885|73991351|73991554|74010000|74010129	-0.185	ENSG00000154589|LY96|chr8|+|SE|74004795|74004885|73991351|73991554|74010000|74010129_DN
ENSG00000198431|TXNRD1|chr12|+|MXE|104290992|104291104|104309758|104309950|104288930|104289040|104311289|104311412	-0.185	ENSG00000198431|TXNRD1|chr12|+|MXE|104290992|104291104|104309758|104309950|104288930|104289040|104311289|104311412_DN
ENSG00000101639|CEP192|chr18|+|SE|13071038|13071212|13069737|13069856|13072754|13072845	-0.184	ENSG00000101639|CEP192|chr18|+|SE|13071038|13071212|13069737|13069856|13072754|13072845_DN
ENSG00000075413|MARK3|chr14|+|A3SS|103468032|103468186|103468080|103468186|103467078|103467191	-0.184	ENSG00000075413|MARK3|chr14|+|A3SS|103468032|103468186|103468080|103468186|103467078|103467191_DN
ENSG00000139734|DIAPH3|chr13|-|MXE|60093627|60093732|60112009|60112186|60042689|60042820|60163586|60163766	-0.183	ENSG00000139734|DIAPH3|chr13|-|MXE|60093627|60093732|60112009|60112186|60042689|60042820|60163586|60163766_DN
ENSG00000072518|MARK2|chr11|+|SE|63906087|63906114|63904785|63905043|63908876|63909579	-0.183	ENSG00000072518|MARK2|chr11|+|SE|63906087|63906114|63904785|63905043|63908876|63909579_DN
ENSG00000078589|P2RY10|chrX|+|SE|78947814|78947863|78945420|78945495|78952192|78952335	-0.183	ENSG00000078589|P2RY10|chrX|+|SE|78947814|78947863|78945420|78945495|78952192|78952335_DN
ENSG00000167283|ATP5MG|chr11|+|SE|118403923|118403985|118401618|118401717|118405656|118405709	-0.182	ENSG00000167283|ATP5MG|chr11|+|SE|118403923|118403985|118401618|118401717|118405656|118405709_DN
ENSG00000125686|MED1|chr17|-|SE|39440385|39440518|39439164|39439193|39440622|39440677	-0.182	ENSG00000125686|MED1|chr17|-|SE|39440385|39440518|39439164|39439193|39440622|39440677_DN
ENSG00000137822|TUBGCP4|chr15|+|A5SS|43401715|43403799|43401715|43401850|43404412|43404552	-0.182	ENSG00000137822|TUBGCP4|chr15|+|A5SS|43401715|43403799|43401715|43401850|43404412|43404552_DN
ENSG00000166200|COPS2|chr15|-|A3SS|49137347|49137458|49137347|49137437|49139527|49139653	-0.18	ENSG00000166200|COPS2|chr15|-|A3SS|49137347|49137458|49137347|49137437|49139527|49139653_DN
ENSG00000167483|FAM129C|chr19|+|SE|17530754|17530885|17527237|17527395|17532262|17532388	-0.18	ENSG00000167483|FAM129C|chr19|+|SE|17530754|17530885|17527237|17527395|17532262|17532388_DN
ENSG00000141013|GAS8|chr16|+|A3SS|90031189|90031496|90031298|90031496|90027635|90027722	-0.18	ENSG00000141013|GAS8|chr16|+|A3SS|90031189|90031496|90031298|90031496|90027635|90027722_DN
ENSG00000141480|ARRB2|chr17|+|SE|4715012|4715043|4710488|4710744|4715972|4716033	-0.179	ENSG00000141480|ARRB2|chr17|+|SE|4715012|4715043|4710488|4710744|4715972|4716033_DN
ENSG00000123179|EBPL|chr13|-|SE|49669776|49669846|49660722|49661208|49691253|49691463	-0.179	ENSG00000123179|EBPL|chr13|-|SE|49669776|49669846|49660722|49661208|49691253|49691463_DN
ENSG00000163605|PPP4R2|chr3|+|A3SS|73064002|73064146|73064064|73064146|73063672|73063747	-0.179	ENSG00000163605|PPP4R2|chr3|+|A3SS|73064002|73064146|73064064|73064146|73063672|73063747_DN
ENSG00000114126|TFDP2|chr3|-|SE|141993537|141993585|141978519|141978682|142005440|142005544	-0.179	ENSG00000114126|TFDP2|chr3|-|SE|141993537|141993585|141978519|141978682|142005440|142005544_DN
ENSG00000070081|NUCB2|chr11|+|SE|17286633|17286713|17282788|17282943|17291239|17291365	-0.178	ENSG00000070081|NUCB2|chr11|+|SE|17286633|17286713|17282788|17282943|17291239|17291365_DN
ENSG00000171298|GAA|chr17|+|SE|80101810|80101890|80101593|80101625|80104554|80105132	-0.177	ENSG00000171298|GAA|chr17|+|SE|80101810|80101890|80101593|80101625|80104554|80105132_DN
ENSG00000213983|AP1G2|chr14|-|SE|23566561|23566686|23566277|23566419|23567110|23567315	-0.176	ENSG00000213983|AP1G2|chr14|-|SE|23566561|23566686|23566277|23566419|23567110|23567315_DN
ENSG00000189079|ARID2|chr12|+|SE|45904341|45904398|45893629|45893721|45904933|45908040	-0.176	ENSG00000189079|ARID2|chr12|+|SE|45904341|45904398|45893629|45893721|45904933|45908040_DN
ENSG00000132716|DCAF8|chr1|-|SE|160261284|160261358|160243959|160244034|160262448|160262501	-0.176	ENSG00000132716|DCAF8|chr1|-|SE|160261284|160261358|160243959|160244034|160262448|160262501_DN
ENSG00000214331|AC009053.1|chr16|-|SE|74349741|74349859|74348866|74349015|74350616|74350738	-0.175	ENSG00000214331|AC009053.1|chr16|-|SE|74349741|74349859|74348866|74349015|74350616|74350738_DN
ENSG00000172322|CLEC12A|chr12|+|RI|9971414|9971687|9971414|9971469|9971576|9971687	-0.174	ENSG00000172322|CLEC12A|chr12|+|RI|9971414|9971687|9971414|9971469|9971576|9971687_DN
ENSG00000143797|MBOAT2|chr2|-|SE|8862589|8862722|8862270|8862322|8864169|8864234	-0.174	ENSG00000143797|MBOAT2|chr2|-|SE|8862589|8862722|8862270|8862322|8864169|8864234_DN
ENSG00000162910|MRPL55|chr1|-|A5SS|228109148|228109299|228109260|228109299|228108954|228109021	-0.174	ENSG00000162910|MRPL55|chr1|-|A5SS|228109148|228109299|228109260|228109299|228108954|228109021_DN
ENSG00000100614|PPM1A|chr14|+|SE|60277004|60277091|60249659|60249677|60282683|60283537	-0.174	ENSG00000100614|PPM1A|chr14|+|SE|60277004|60277091|60249659|60249677|60282683|60283537_DN
ENSG00000162572|SCNN1D|chr1|+|RI|1287507|1287836|1287507|1287596|1287672|1287836	-0.174	ENSG00000162572|SCNN1D|chr1|+|RI|1287507|1287836|1287507|1287596|1287672|1287836_DN
ENSG00000113658|SMAD5|chr5|+|SE|136147831|136147906|136132844|136132962|136153591|136153763	-0.174	ENSG00000113658|SMAD5|chr5|+|SE|136147831|136147906|136132844|136132962|136153591|136153763_DN
ENSG00000130511|SSBP4|chr19|+|SE|18431352|18431418|18430840|18430930|18431646|18431706	-0.174	ENSG00000130511|SSBP4|chr19|+|SE|18431352|18431418|18430840|18430930|18431646|18431706_DN
ENSG00000119725|ZNF410|chr14|+|A3SS|73896315|73896534|73896347|73896534|73893796|73893932	-0.174	ENSG00000119725|ZNF410|chr14|+|A3SS|73896315|73896534|73896347|73896534|73893796|73893932_DN
ENSG00000026508|CD44|chr11|+|SE|35204511|35204640|35189834|35190065|35208104|35208206	-0.173	ENSG00000026508|CD44|chr11|+|SE|35204511|35204640|35189834|35190065|35208104|35208206_DN
ENSG00000079277|MKNK1|chr1|-|A5SS|46604164|46604255|46604226|46604255|46594112|46594280	-0.173	ENSG00000079277|MKNK1|chr1|-|A5SS|46604164|46604255|46604226|46604255|46594112|46594280_DN
ENSG00000130734|ATG4D|chr19|+|RI|10546838|10547253|10546838|10547115|10547188|10547253	-0.172	ENSG00000130734|ATG4D|chr19|+|RI|10546838|10547253|10546838|10547115|10547188|10547253_DN
ENSG00000007944|MYLIP|chr6|+|SE|16130556|16130747|16129124|16129409|16141624|16141810	-0.172	ENSG00000007944|MYLIP|chr6|+|SE|16130556|16130747|16129124|16129409|16141624|16141810_DN
ENSG00000135317|SNX14|chr6|-|SE|85538837|85538864|85536791|85536924|85541984|85542043	-0.171	ENSG00000135317|SNX14|chr6|-|SE|85538837|85538864|85536791|85536924|85541984|85542043_DN
ENSG00000104763|ASAH1|chr8|-|SE|18064456|18064468|18063184|18063230|18067219|18067298	-0.17	ENSG00000104763|ASAH1|chr8|-|SE|18064456|18064468|18063184|18063230|18067219|18067298_DN
ENSG00000175592|FOSL1|chr11|-|SE|65896808|65897006|65892473|65893296|65900240|65900419	-0.17	ENSG00000175592|FOSL1|chr11|-|SE|65896808|65897006|65892473|65893296|65900240|65900419_DN
ENSG00000121749|TBC1D15|chr12|+|MXE|71854784|71854853|71861404|71861496|71839758|71839811|71872069|71872168	-0.17	ENSG00000121749|TBC1D15|chr12|+|MXE|71854784|71854853|71861404|71861496|71839758|71839811|71872069|71872168_DN
ENSG00000155329|ZCCHC10|chr5|-|SE|133022840|133022906|133006758|133006920|133026496|133026545	-0.17	ENSG00000155329|ZCCHC10|chr5|-|SE|133022840|133022906|133006758|133006920|133026496|133026545_DN
ENSG00000186431|FCAR|chr19|+|SE|54888006|54888220|54885234|54885525|54889648|54889863	-0.169	ENSG00000186431|FCAR|chr19|+|SE|54888006|54888220|54885234|54885525|54889648|54889863_DN
ENSG00000182979|MTA1|chr14|+|A3SS|105464415|105464567|105464462|105464567|105464031|105464147	-0.169	ENSG00000182979|MTA1|chr14|+|A3SS|105464415|105464567|105464462|105464567|105464031|105464147_DN
ENSG00000156831|NSMCE2|chr8|+|A3SS|125102013|125102146|125102050|125102146|125091843|125091958	-0.169	ENSG00000156831|NSMCE2|chr8|+|A3SS|125102013|125102146|125102050|125102146|125091843|125091958_DN
ENSG00000236287|ZBED5|chr11|-|A3SS|10856143|10856257|10856143|10856205|10857861|10858065	-0.169	ENSG00000236287|ZBED5|chr11|-|A3SS|10856143|10856257|10856143|10856205|10857861|10858065_DN
ENSG00000175061|LRRC75A-AS1|chr17|+|A3SS|16439527|16439703|16439580|16439703|16439326|16439414	-0.168	ENSG00000175061|LRRC75A-AS1|chr17|+|A3SS|16439527|16439703|16439580|16439703|16439326|16439414_DN
ENSG00000175061|LRRC75A-AS1|chr17|+|RI|16439036|16439414|16439036|16439060|16439326|16439414	-0.168	ENSG00000175061|LRRC75A-AS1|chr17|+|RI|16439036|16439414|16439036|16439060|16439326|16439414_DN
ENSG00000146918|NCAPG2|chr7|-|A3SS|158675476|158675656|158675476|158675616|158679959|158680085	-0.168	ENSG00000146918|NCAPG2|chr7|-|A3SS|158675476|158675656|158675476|158675616|158679959|158680085_DN
ENSG00000169231|THBS3|chr1|-|SE|155204854|155204957|155203512|155203539|155205059|155205316	-0.168	ENSG00000169231|THBS3|chr1|-|SE|155204854|155204957|155203512|155203539|155205059|155205316_DN
ENSG00000159063|ALG8|chr11|-|A3SS|78106806|78106946|78106806|78106912|78109441|78109581	-0.167	ENSG00000159063|ALG8|chr11|-|A3SS|78106806|78106946|78106806|78106912|78109441|78109581_DN
ENSG00000085063|CD59|chr11|-|SE|33731423|33731468|33722378|33722463|33736381|33736423	-0.167	ENSG00000085063|CD59|chr11|-|SE|33731423|33731468|33722378|33722463|33736381|33736423_DN
ENSG00000219626|FAM228B|chr2|+|SE|24137908|24138100|24135118|24135187|24139369|24139450	-0.167	ENSG00000219626|FAM228B|chr2|+|SE|24137908|24138100|24135118|24135187|24139369|24139450_DN
ENSG00000173226|IQCB1|chr3|-|SE|121828469|121828632|121826050|121826180|121828860|121828972	-0.167	ENSG00000173226|IQCB1|chr3|-|SE|121828469|121828632|121826050|121826180|121828860|121828972_DN
ENSG00000132305|IMMT|chr2|-|A3SS|86171207|86171345|86171207|86171312|86173649|86173761	-0.166	ENSG00000132305|IMMT|chr2|-|A3SS|86171207|86171345|86171207|86171312|86173649|86173761_DN
ENSG00000196233|LCOR|chr10|+|SE|96954952|96955834|96952102|96952196|96958411|96958926	-0.166	ENSG00000196233|LCOR|chr10|+|SE|96954952|96955834|96952102|96952196|96958411|96958926_DN
ENSG00000198901|PRC1|chr15|-|SE|90969078|90969120|90966037|90967202|90969523|90969623	-0.166	ENSG00000198901|PRC1|chr15|-|SE|90969078|90969120|90966037|90967202|90969523|90969623_DN
ENSG00000170889|RPS9|chr19|+|RI|54206552|54207647|54206552|54206724|54207397|54207647	-0.166	ENSG00000170889|RPS9|chr19|+|RI|54206552|54207647|54206552|54206724|54207397|54207647_DN
ENSG00000182362|YBEY|chr21|+|SE|46291333|46291462|46286869|46287123|46296161|46296230	-0.166	ENSG00000182362|YBEY|chr21|+|SE|46291333|46291462|46286869|46287123|46296161|46296230_DN
ENSG00000122515|ZMIZ2|chr7|+|A3SS|44756946|44757149|44757042|44757149|44756424|44756539	-0.166	ENSG00000122515|ZMIZ2|chr7|+|A3SS|44756946|44757149|44757042|44757149|44756424|44756539_DN
ENSG00000163319|MRPS18C|chr4|+|SE|83458345|83458429|83456908|83456958|83459739|83459797	-0.165	ENSG00000163319|MRPS18C|chr4|+|SE|83458345|83458429|83456908|83456958|83459739|83459797_DN
ENSG00000126773|PCNX4|chr14|+|SE|60107585|60108327|60091918|60092419|60114699|60114879	-0.165	ENSG00000126773|PCNX4|chr14|+|SE|60107585|60108327|60091918|60092419|60114699|60114879_DN
ENSG00000116786|PLEKHM2|chr1|+|SE|15721328|15721388|15719733|15719920|15725316|15725545	-0.164	ENSG00000116786|PLEKHM2|chr1|+|SE|15721328|15721388|15719733|15719920|15725316|15725545_DN
ENSG00000241852|C8orf58|chr8|+|RI|22601971|22602312|22601971|22602080|22602199|22602312	-0.163	ENSG00000241852|C8orf58|chr8|+|RI|22601971|22602312|22601971|22602080|22602199|22602312_DN
ENSG00000114127|XRN1|chr3|-|A3SS|142332374|142332531|142332374|142332424|142332966|142333089	-0.163	ENSG00000114127|XRN1|chr3|-|A3SS|142332374|142332531|142332374|142332424|142332966|142333089_DN
ENSG00000107625|DDX50|chr10|+|SE|68934198|68934360|68919831|68919981|68934798|68934918	-0.162	ENSG00000107625|DDX50|chr10|+|SE|68934198|68934360|68919831|68919981|68934798|68934918_DN
ENSG00000076242|MLH1|chr3|+|SE|36994829|36994953|36993776|36993890|36996618|36996709	-0.162	ENSG00000076242|MLH1|chr3|+|SE|36994829|36994953|36993776|36993890|36996618|36996709_DN
ENSG00000282851|BISPR|chr19|+|SE|17413096|17413305|17406076|17406296|17414390|17415005	-0.161	ENSG00000282851|BISPR|chr19|+|SE|17413096|17413305|17406076|17406296|17414390|17415005_DN
ENSG00000175061|LRRC75A-AS1|chr17|+|RI|16439326|16439703|16439326|16439414|16439659|16439703	-0.161	ENSG00000175061|LRRC75A-AS1|chr17|+|RI|16439326|16439703|16439326|16439414|16439659|16439703_DN
ENSG00000168056|LTBP3|chr11|-|SE|65540012|65540153|65539719|65539881|65540244|65540382	-0.161	ENSG00000168056|LTBP3|chr11|-|SE|65540012|65540153|65539719|65539881|65540244|65540382_DN
ENSG00000249859|PVT1|chr8|+|SE|127983903|127984204|127939507|127939676|127989161|127989291	-0.161	ENSG00000249859|PVT1|chr8|+|SE|127983903|127984204|127939507|127939676|127989161|127989291_DN
ENSG00000022840|RNF10|chr12|+|A3SS|120563331|120563623|120563346|120563623|120562944|120563070	-0.161	ENSG00000022840|RNF10|chr12|+|A3SS|120563331|120563623|120563346|120563623|120562944|120563070_DN
ENSG00000075826|SEC31B|chr10|-|SE|100509315|100509511|100509006|100509102|100516095|100516219	-0.161	ENSG00000075826|SEC31B|chr10|-|SE|100509315|100509511|100509006|100509102|100516095|100516219_DN
ENSG00000114120|SLC25A36|chr3|+|A3SS|140966933|140967036|140966999|140967036|140963126|140963227	-0.161	ENSG00000114120|SLC25A36|chr3|+|A3SS|140966933|140967036|140966999|140967036|140963126|140963227_DN
ENSG00000090621|PABPC4|chr1|-|SE|39563835|39563922|39563613|39563741|39564422|39564491	-0.16	ENSG00000090621|PABPC4|chr1|-|SE|39563835|39563922|39563613|39563741|39564422|39564491_DN
ENSG00000197555|SIPA1L1|chr14|+|SE|71400793|71400918|71321121|71321181|71413947|71414014	-0.16	ENSG00000197555|SIPA1L1|chr14|+|SE|71400793|71400918|71321121|71321181|71413947|71414014_DN
ENSG00000071054|MAP4K4|chr2|+|MXE|101860824|101860986|101863820|101864051|101859735|101859864|101864929|101865036	-0.157	ENSG00000071054|MAP4K4|chr2|+|MXE|101860824|101860986|101863820|101864051|101859735|101859864|101864929|101865036_DN
ENSG00000168175|MAPK1IP1L|chr14|+|SE|55061679|55061701|55051630|55051803|55062617|55063325	-0.157	ENSG00000168175|MAPK1IP1L|chr14|+|SE|55061679|55061701|55051630|55051803|55062617|55063325_DN
ENSG00000169057|MECP2|chrX|-|SE|154092183|154092307|154032206|154032557|154097603|154097663	-0.157	ENSG00000169057|MECP2|chrX|-|SE|154092183|154092307|154032206|154032557|154097603|154097663_DN
ENSG00000138600|SPPL2A|chr15|-|SE|50726072|50726126|50725220|50725323|50726320|50726377	-0.157	ENSG00000138600|SPPL2A|chr15|-|SE|50726072|50726126|50725220|50725323|50726320|50726377_DN
ENSG00000101150|TPD52L2|chr20|+|SE|63875815|63875875|63873667|63873816|63882718|63882820	-0.157	ENSG00000101150|TPD52L2|chr20|+|SE|63875815|63875875|63873667|63873816|63882718|63882820_DN
ENSG00000116747|TROVE2|chr1|+|SE|193069033|193069634|193059421|193059776|193075819|193076040	-0.157	ENSG00000116747|TROVE2|chr1|+|SE|193069033|193069634|193059421|193059776|193075819|193076040_DN
ENSG00000095564|BTAF1|chr10|+|A5SS|91959064|91959282|91959064|91959154|91959784|91959880	-0.156	ENSG00000095564|BTAF1|chr10|+|A5SS|91959064|91959282|91959064|91959154|91959784|91959880_DN
ENSG00000181090|EHMT1|chr9|+|A3SS|137743370|137743528|137743391|137743528|137728348|137728529	-0.156	ENSG00000181090|EHMT1|chr9|+|A3SS|137743370|137743528|137743391|137743528|137728348|137728529_DN
ENSG00000186431|FCAR|chr19|+|SE|54888006|54888228|54885234|54885525|54889648|54889863	-0.156	ENSG00000186431|FCAR|chr19|+|SE|54888006|54888228|54885234|54885525|54889648|54889863_DN
ENSG00000147099|HDAC8|chrX|-|MXE|72567888|72568030|72568753|72568884|72495155|72495268|72572056|72572109	-0.156	ENSG00000147099|HDAC8|chrX|-|MXE|72567888|72568030|72568753|72568884|72495155|72495268|72572056|72572109_DN
ENSG00000128731|HERC2|chr15|-|SE|28163093|28163285|28152676|28152830|28167686|28167827	-0.156	ENSG00000128731|HERC2|chr15|-|SE|28163093|28163285|28152676|28152830|28167686|28167827_DN
ENSG00000049323|LTBP1|chr2|+|A3SS|33257367|33257511|33257442|33257511|33252676|33252844	-0.156	ENSG00000049323|LTBP1|chr2|+|A3SS|33257367|33257511|33257442|33257511|33252676|33252844_DN
ENSG00000104763|ASAH1|chr8|-|SE|18064456|18064471|18063184|18063230|18067219|18067298	-0.155	ENSG00000104763|ASAH1|chr8|-|SE|18064456|18064471|18063184|18063230|18067219|18067298_DN
ENSG00000144597|EAF1|chr3|+|SE|15432086|15432223|15429912|15430007|15434347|15434538	-0.155	ENSG00000144597|EAF1|chr3|+|SE|15432086|15432223|15429912|15430007|15434347|15434538_DN
ENSG00000162241|SLC25A45|chr11|-|SE|65379375|65379561|65376817|65377076|65379866|65379938	-0.155	ENSG00000162241|SLC25A45|chr11|-|SE|65379375|65379561|65376817|65377076|65379866|65379938_DN
ENSG00000175581|MRPL48|chr11|+|MXE|73808312|73808350|73825707|73825796|73805026|73805079|73844806|73844976	-0.154	ENSG00000175581|MRPL48|chr11|+|MXE|73808312|73808350|73825707|73825796|73805026|73805079|73844806|73844976_DN
ENSG00000172590|MRPL52|chr14|+|SE|22830963|22831037|22830186|22830254|22834171|22834977	-0.154	ENSG00000172590|MRPL52|chr14|+|SE|22830963|22831037|22830186|22830254|22834171|22834977_DN
ENSG00000139977|NAA30|chr14|+|SE|57399827|57399883|57396751|57396875|57409378|57410330	-0.154	ENSG00000139977|NAA30|chr14|+|SE|57399827|57399883|57396751|57396875|57409378|57410330_DN
ENSG00000265681|RPL17|chr18|-|SE|49491735|49491833|49491531|49491584|49492457|49492508	-0.154	ENSG00000265681|RPL17|chr18|-|SE|49491735|49491833|49491531|49491584|49492457|49492508_DN
ENSG00000163597|SNHG16|chr17|+|SE|76558944|76559043|76557791|76557857|76561287|76561398	-0.154	ENSG00000163597|SNHG16|chr17|+|SE|76558944|76559043|76557791|76557857|76561287|76561398_DN
ENSG00000006282|SPATA20|chr17|+|SE|50547664|50547954|50547204|50547285|50548282|50548453	-0.154	ENSG00000006282|SPATA20|chr17|+|SE|50547664|50547954|50547204|50547285|50548282|50548453_DN
ENSG00000154813|DPH3|chr3|-|SE|16264154|16264229|16257977|16260829|16264768|16264972	-0.153	ENSG00000154813|DPH3|chr3|-|SE|16264154|16264229|16257977|16260829|16264768|16264972_DN
ENSG00000109736|MFSD10|chr4|-|A3SS|2932350|2932512|2932350|2932409|2932599|2932758	-0.153	ENSG00000109736|MFSD10|chr4|-|A3SS|2932350|2932512|2932350|2932409|2932599|2932758_DN
ENSG00000164292|RHOBTB3|chr5|+|SE|95736888|95737075|95731858|95732084|95748332|95748441	-0.153	ENSG00000164292|RHOBTB3|chr5|+|SE|95736888|95737075|95731858|95732084|95748332|95748441_DN
ENSG00000137413|TAF8|chr6|+|SE|42071346|42071468|42068464|42068607|42077099|42077239	-0.153	ENSG00000137413|TAF8|chr6|+|SE|42071346|42071468|42068464|42068607|42077099|42077239_DN
ENSG00000099785|MARCHF2|chr19|+|SE|8418536|8418807|8413289|8413420|8421788|8421951	-0.152	ENSG00000099785|MARCHF2|chr19|+|SE|8418536|8418807|8413289|8413420|8421788|8421951_DN
ENSG00000204344|STK19|chr6|+|SE|31979413|31979553|31978902|31978998|31980450|31980548	-0.152	ENSG00000204344|STK19|chr6|+|SE|31979413|31979553|31978902|31978998|31980450|31980548_DN
ENSG00000172262|ZNF131|chr5|+|RI|43161248|43161931|43161248|43161606|43161708|43161931	-0.152	ENSG00000172262|ZNF131|chr5|+|RI|43161248|43161931|43161248|43161606|43161708|43161931_DN
ENSG00000185485|SDHAP1|chr3|-|SE|195960299|195960423|195959747|195960086|195963299|195963421	-0.151	ENSG00000185485|SDHAP1|chr3|-|SE|195960299|195960423|195959747|195960086|195963299|195963421_DN
ENSG00000135899|SP110|chr2|-|SE|230216780|230216821|230214949|230215118|230219873|230219961	-0.151	ENSG00000135899|SP110|chr2|-|SE|230216780|230216821|230214949|230215118|230219873|230219961_DN
ENSG00000008294|SPAG9|chr17|-|SE|50975862|50975901|50974770|50974947|50977107|50977221	-0.151	ENSG00000008294|SPAG9|chr17|-|SE|50975862|50975901|50974770|50974947|50977107|50977221_DN
ENSG00000075292|ZNF638|chr2|+|SE|71380837|71380903|71380512|71380565|71396140|71396191	-0.151	ENSG00000075292|ZNF638|chr2|+|SE|71380837|71380903|71380512|71380565|71396140|71396191_DN
ENSG00000100288|CHKB|chr22|-|A3SS|50579726|50579830|50579726|50579802|50579973|50580082	-0.15	ENSG00000100288|CHKB|chr22|-|A3SS|50579726|50579830|50579726|50579802|50579973|50580082_DN
ENSG00000243147|MRPL33|chr2|+|SE|27774423|27774530|27772673|27772692|27779432|27779697	-0.15	ENSG00000243147|MRPL33|chr2|+|SE|27774423|27774530|27772673|27772692|27779432|27779697_DN
ENSG00000005189|REXO5|chr16|+|SE|20824438|20824527|20821761|20821902|20825832|20825871	-0.15	ENSG00000005189|REXO5|chr16|+|SE|20824438|20824527|20821761|20821902|20825832|20825871_DN
ENSG00000189339|SLC35E2B|chr1|-|SE|1690975|1691393|1676377|1676846|1692448|1692644	-0.15	ENSG00000189339|SLC35E2B|chr1|-|SE|1690975|1691393|1676377|1676846|1692448|1692644_DN
ENSG00000096063|SRPK1|chr6|-|SE|35904878|35904974|35890894|35891041|35920467|35920528	-0.15	ENSG00000096063|SRPK1|chr6|-|SE|35904878|35904974|35890894|35891041|35920467|35920528_DN
ENSG00000070831|CDC42|chr1|+|SE|22074093|22074219|22052667|22052742|22078428|22078583	-0.149	ENSG00000070831|CDC42|chr1|+|SE|22074093|22074219|22052667|22052742|22078428|22078583_DN
ENSG00000121749|TBC1D15|chr12|+|SE|71854784|71854853|71839758|71839811|71872069|71872168	-0.149	ENSG00000121749|TBC1D15|chr12|+|SE|71854784|71854853|71839758|71839811|71872069|71872168_DN
ENSG00000084234|APLP2|chr11|+|SE|130137255|130137291|130135562|130135715|130140397|130140483	-0.148	ENSG00000084234|APLP2|chr11|+|SE|130137255|130137291|130135562|130135715|130140397|130140483_DN
ENSG00000137478|FCHSD2|chr11|-|SE|72842620|72842841|72841453|72841583|72843150|72843328	-0.148	ENSG00000137478|FCHSD2|chr11|-|SE|72842620|72842841|72841453|72841583|72843150|72843328_DN
ENSG00000213930|GALT|chr9|+|SE|34647491|34647705|34647088|34647258|34647831|34647961	-0.148	ENSG00000213930|GALT|chr9|+|SE|34647491|34647705|34647088|34647258|34647831|34647961_DN
ENSG00000101384|JAG1|chr20|-|A3SS|10648548|10648722|10648548|10648676|10649060|10649107	-0.148	ENSG00000101384|JAG1|chr20|-|A3SS|10648548|10648722|10648548|10648676|10649060|10649107_DN
ENSG00000060237|WNK1|chr12|+|SE|871264|871348|862082|862270|878214|878361	-0.148	ENSG00000060237|WNK1|chr12|+|SE|871264|871348|862082|862270|878214|878361_DN
ENSG00000175061|LRRC75A-AS1|chr17|+|SE|16439527|16439703|16439062|16439414|16440110|16440253	-0.147	ENSG00000175061|LRRC75A-AS1|chr17|+|SE|16439527|16439703|16439062|16439414|16440110|16440253_DN
ENSG00000205531|NAP1L4|chr11|-|SE|2949226|2949264|2944436|2945646|2951258|2951315	-0.147	ENSG00000205531|NAP1L4|chr11|-|SE|2949226|2949264|2944436|2945646|2951258|2951315_DN
ENSG00000198176|TFDP1|chr13|+|SE|113631622|113631905|113623179|113623286|113633119|113633285	-0.147	ENSG00000198176|TFDP1|chr13|+|SE|113631622|113631905|113623179|113623286|113633119|113633285_DN
ENSG00000228315|GUSBP11|chr22|-|SE|23686830|23686995|23683724|23683867|23690235|23693151	-0.146	ENSG00000228315|GUSBP11|chr22|-|SE|23686830|23686995|23683724|23683867|23690235|23693151_DN
ENSG00000123473|STIL|chr1|-|A3SS|47262902|47263113|47262902|47263062|47269634|47269866	-0.146	ENSG00000123473|STIL|chr1|-|A3SS|47262902|47263113|47262902|47263062|47269634|47269866_DN
ENSG00000137822|TUBGCP4|chr15|+|SE|43403682|43403799|43401715|43401850|43404412|43404552	-0.146	ENSG00000137822|TUBGCP4|chr15|+|SE|43403682|43403799|43401715|43401850|43404412|43404552_DN
ENSG00000244687|UBE2V1|chr20|-|SE|50096482|50096820|50084128|50084254|50113106|50113133	-0.146	ENSG00000244687|UBE2V1|chr20|-|SE|50096482|50096820|50084128|50084254|50113106|50113133_DN
ENSG00000182307|C8orf33|chr8|+|RI|145052466|145052897|145052466|145052497|145052585|145052897	-0.145	ENSG00000182307|C8orf33|chr8|+|RI|145052466|145052897|145052466|145052497|145052585|145052897_DN
ENSG00000143458|GABPB2|chr1|+|SE|151088469|151088517|151088157|151088297|151090405|151090573	-0.145	ENSG00000143458|GABPB2|chr1|+|SE|151088469|151088517|151088157|151088297|151090405|151090573_DN
ENSG00000271853|AL162258.1|chr1|-|RI|153632033|153632240|153632033|153632063|153632154|153632240	-0.144	ENSG00000271853|AL162258.1|chr1|-|RI|153632033|153632240|153632033|153632063|153632154|153632240_DN
ENSG00000090621|PABPC4|chr1|-|SE|39563835|39563922|39563613|39563741|39564470|39564542	-0.144	ENSG00000090621|PABPC4|chr1|-|SE|39563835|39563922|39563613|39563741|39564470|39564542_DN
ENSG00000100479|POLE2|chr14|-|SE|49654783|49654838|49654154|49654214|49655004|49655094	-0.144	ENSG00000100479|POLE2|chr14|-|SE|49654783|49654838|49654154|49654214|49655004|49655094_DN
ENSG00000138326|RPS24|chr10|+|SE|78040203|78040225|78037193|78037304|78040614|78040696	-0.144	ENSG00000138326|RPS24|chr10|+|SE|78040203|78040225|78037193|78037304|78040614|78040696_DN
ENSG00000245910|SNHG6|chr8|-|SE|66922323|66922392|66921817|66922114|66922613|66922725	-0.144	ENSG00000245910|SNHG6|chr8|-|SE|66922323|66922392|66921817|66922114|66922613|66922725_DN
ENSG00000026508|CD44|chr11|+|SE|35204511|35204640|35189834|35190065|35206111|35206243	-0.143	ENSG00000026508|CD44|chr11|+|SE|35204511|35204640|35189834|35190065|35206111|35206243_DN
ENSG00000085382|HACE1|chr6|-|A3SS|104777012|104777110|104777012|104777097|104777205|104777317	-0.143	ENSG00000085382|HACE1|chr6|-|A3SS|104777012|104777110|104777012|104777097|104777205|104777317_DN
ENSG00000147050|KDM6A|chrX|+|SE|45062646|45062748|45061323|45061419|45063421|45063817	-0.143	ENSG00000147050|KDM6A|chrX|+|SE|45062646|45062748|45061323|45061419|45063421|45063817_DN
ENSG00000177989|ODF3B|chr22|-|SE|50531569|50531702|50531190|50531295|50531968|50532184	-0.143	ENSG00000177989|ODF3B|chr22|-|SE|50531569|50531702|50531190|50531295|50531968|50532184_DN
ENSG00000154845|PPP4R1|chr18|-|A3SS|9595017|9595153|9595017|9595102|9614225|9614270	-0.143	ENSG00000154845|PPP4R1|chr18|-|A3SS|9595017|9595153|9595017|9595102|9614225|9614270_DN
ENSG00000169371|SNUPN|chr15|-|SE|75622341|75622490|75620893|75621056|75625665|75625794	-0.143	ENSG00000169371|SNUPN|chr15|-|SE|75622341|75622490|75620893|75621056|75625665|75625794_DN
ENSG00000126746|ZNF384|chr12|-|A5SS|6689097|6689510|6689367|6689510|6688166|6688226	-0.143	ENSG00000126746|ZNF384|chr12|-|A5SS|6689097|6689510|6689367|6689510|6688166|6688226_DN
ENSG00000213930|GALT|chr9|+|A3SS|34647491|34647961|34647831|34647961|34647088|34647258	-0.142	ENSG00000213930|GALT|chr9|+|A3SS|34647491|34647961|34647831|34647961|34647088|34647258_DN
ENSG00000143797|MBOAT2|chr2|-|MXE|8862270|8862322|8862589|8862722|8860612|8860764|8864169|8864234	-0.142	ENSG00000143797|MBOAT2|chr2|-|MXE|8862270|8862322|8862589|8862722|8860612|8860764|8864169|8864234_DN
ENSG00000093000|NUP50|chr22|+|SE|45166308|45166430|45163986|45164296|45168167|45168246	-0.142	ENSG00000093000|NUP50|chr22|+|SE|45166308|45166430|45163986|45164296|45168167|45168246_DN
ENSG00000131503|ANKHD1|chr5|+|A3SS|140438460|140438617|140438502|140438617|140436103|140436257	-0.141	ENSG00000131503|ANKHD1|chr5|+|A3SS|140438460|140438617|140438502|140438617|140436103|140436257_DN
ENSG00000198901|PRC1|chr15|-|SE|90969078|90969120|90966037|90967202|90969446|90969623	-0.141	ENSG00000198901|PRC1|chr15|-|SE|90969078|90969120|90966037|90967202|90969446|90969623_DN
ENSG00000134419|RPS15A|chr16|-|A5SS|18790243|18790334|18790309|18790334|18788980|18789118	-0.141	ENSG00000134419|RPS15A|chr16|-|A5SS|18790243|18790334|18790309|18790334|18788980|18789118_DN
ENSG00000142192|APP|chr21|-|SE|25997359|25997416|25982343|25982477|26000014|26000182	-0.14	ENSG00000142192|APP|chr21|-|SE|25997359|25997416|25982343|25982477|26000014|26000182_DN
ENSG00000104312|RIPK2|chr8|+|SE|89762828|89762982|89757746|89758233|89765340|89765496	-0.14	ENSG00000104312|RIPK2|chr8|+|SE|89762828|89762982|89757746|89758233|89765340|89765496_DN
ENSG00000100852|ARHGAP5|chr14|+|SE|32117142|32117287|32090501|32094386|32146262|32146340	-0.139	ENSG00000100852|ARHGAP5|chr14|+|SE|32117142|32117287|32090501|32094386|32146262|32146340_DN
ENSG00000130429|ARPC1B|chr7|+|A3SS|99377337|99377439|99377357|99377439|99374729|99374781	-0.139	ENSG00000130429|ARPC1B|chr7|+|A3SS|99377337|99377439|99377357|99377439|99374729|99374781_DN
ENSG00000108953|YWHAE|chr17|-|SE|1354210|1354347|1344271|1345499|1364858|1365058	-0.139	ENSG00000108953|YWHAE|chr17|-|SE|1354210|1354347|1344271|1345499|1364858|1365058_DN
ENSG00000151726|ACSL1|chr4|-|A3SS|184762406|184762523|184762406|184762493|184763166|184763255	-0.138	ENSG00000151726|ACSL1|chr4|-|A3SS|184762406|184762523|184762406|184762493|184763166|184763255_DN
ENSG00000114107|CEP70|chr3|-|A3SS|138572858|138572984|138572858|138572932|138591853|138591956	-0.138	ENSG00000114107|CEP70|chr3|-|A3SS|138572858|138572984|138572858|138572932|138591853|138591956_DN
ENSG00000147202|DIAPH2|chrX|+|SE|96763099|96763120|96758153|96758258|96881578|96881718	-0.138	ENSG00000147202|DIAPH2|chrX|+|SE|96763099|96763120|96758153|96758258|96881578|96881718_DN
ENSG00000138246|DNAJC13|chr3|+|A3SS|132465950|132466070|132465994|132466070|132463695|132463817	-0.138	ENSG00000138246|DNAJC13|chr3|+|A3SS|132465950|132466070|132465994|132466070|132463695|132463817_DN
ENSG00000128309|MPST|chr22|+|SE|37023751|37023927|37019695|37019774|37024191|37024810	-0.138	ENSG00000128309|MPST|chr22|+|SE|37023751|37023927|37019695|37019774|37024191|37024810_DN
ENSG00000205937|RNPS1|chr16|-|SE|2264572|2264760|2264175|2264331|2268054|2268091	-0.138	ENSG00000205937|RNPS1|chr16|-|SE|2264572|2264760|2264175|2264331|2268054|2268091_DN
ENSG00000111011|RSRC2|chr12|-|SE|122522798|122522906|122522142|122522299|122526847|122526959	-0.138	ENSG00000111011|RSRC2|chr12|-|SE|122522798|122522906|122522142|122522299|122526847|122526959_DN
ENSG00000109107|ALDOC|chr17|-|SE|28575964|28576017|28575420|28575544|28576800|28576895	-0.137	ENSG00000109107|ALDOC|chr17|-|SE|28575964|28576017|28575420|28575544|28576800|28576895_DN
ENSG00000167747|C19orf48|chr19|-|SE|50802453|50802614|50802216|50802257|50804571|50804620	-0.137	ENSG00000167747|C19orf48|chr19|-|SE|50802453|50802614|50802216|50802257|50804571|50804620_DN
ENSG00000198848|CES1|chr16|-|A3SS|55810926|55811010|55810926|55811007|55812902|55813043	-0.137	ENSG00000198848|CES1|chr16|-|A3SS|55810926|55811010|55810926|55811007|55812902|55813043_DN
ENSG00000142765|SYTL1|chr1|+|A3SS|27349079|27349152|27349115|27349152|27347966|27348012	-0.137	ENSG00000142765|SYTL1|chr1|+|A3SS|27349079|27349152|27349115|27349152|27347966|27348012_DN
ENSG00000055070|SZRD1|chr1|+|SE|16391374|16391424|16367082|16367308|16393227|16393385	-0.137	ENSG00000055070|SZRD1|chr1|+|SE|16391374|16391424|16367082|16367308|16393227|16393385_DN
ENSG00000130475|FCHO1|chr19|+|SE|17754591|17754758|17754316|17754361|17755117|17755191	-0.136	ENSG00000130475|FCHO1|chr19|+|SE|17754591|17754758|17754316|17754361|17755117|17755191_DN
ENSG00000126214|KLC1|chr14|+|A5SS|103679383|103679545|103679383|103679518|103687080|103687211	-0.136	ENSG00000126214|KLC1|chr14|+|A5SS|103679383|103679545|103679383|103679518|103687080|103687211_DN
ENSG00000127804|METTL16|chr17|-|SE|2467760|2467876|2464207|2464350|2473523|2473664	-0.136	ENSG00000127804|METTL16|chr17|-|SE|2467760|2467876|2464207|2464350|2473523|2473664_DN
ENSG00000114127|XRN1|chr3|-|A3SS|142332374|142332534|142332374|142332424|142332966|142333089	-0.136	ENSG00000114127|XRN1|chr3|-|A3SS|142332374|142332534|142332374|142332424|142332966|142333089_DN
ENSG00000157540|DYRK1A|chr21|+|SE|37430268|37430400|37420298|37420384|37472683|37472829	-0.135	ENSG00000157540|DYRK1A|chr21|+|SE|37430268|37430400|37420298|37420384|37472683|37472829_DN
ENSG00000213398|LCAT|chr16|-|SE|67940736|67940831|67939881|67940478|67942362|67942587	-0.135	ENSG00000213398|LCAT|chr16|-|SE|67940736|67940831|67939881|67940478|67942362|67942587_DN
ENSG00000178927|CYBC1|chr17|-|SE|82447579|82447646|82446622|82446696|82449169|82449320	-0.134	ENSG00000178927|CYBC1|chr17|-|SE|82447579|82447646|82446622|82446696|82449169|82449320_DN
ENSG00000159147|DONSON|chr21|-|SE|33582164|33582246|33581950|33582055|33584589|33584768	-0.134	ENSG00000159147|DONSON|chr21|-|SE|33582164|33582246|33581950|33582055|33584589|33584768_DN
ENSG00000065675|PRKCQ|chr10|-|SE|6441892|6442081|6430809|6430938|6456673|6456812	-0.134	ENSG00000065675|PRKCQ|chr10|-|SE|6441892|6442081|6430809|6430938|6456673|6456812_DN
ENSG00000197912|SPG7|chr16|+|RI|89554485|89557747|89554485|89556085|89556886|89557747	-0.134	ENSG00000197912|SPG7|chr16|+|RI|89554485|89557747|89554485|89556085|89556886|89557747_DN
ENSG00000188603|CLN3|chr16|-|RI|28491713|28492042|28491713|28491835|28492019|28492042	-0.133	ENSG00000188603|CLN3|chr16|-|RI|28491713|28492042|28491713|28491835|28492019|28492042_DN
ENSG00000119616|FCF1|chr14|+|A3SS|74715820|74716099|74715993|74716099|74714871|74714943	-0.133	ENSG00000119616|FCF1|chr14|+|A3SS|74715820|74716099|74715993|74716099|74714871|74714943_DN
ENSG00000119487|MAPKAP1|chr9|-|SE|125672399|125672643|125669817|125669907|125706970|125707198	-0.133	ENSG00000119487|MAPKAP1|chr9|-|SE|125672399|125672643|125669817|125669907|125706970|125707198_DN
ENSG00000114857|NKTR|chr3|+|RI|42619663|42621516|42619663|42619708|42621428|42621516	-0.133	ENSG00000114857|NKTR|chr3|+|RI|42619663|42621516|42619663|42619708|42621428|42621516_DN
ENSG00000141030|COPS3|chr17|-|A5SS|17270757|17271008|17270895|17271008|17267884|17267977	-0.132	ENSG00000141030|COPS3|chr17|-|A5SS|17270757|17271008|17270895|17271008|17267884|17267977_DN
ENSG00000266714|MYO15B|chr17|+|A3SS|75591600|75591712|75591615|75591712|75591171|75591246	-0.132	ENSG00000266714|MYO15B|chr17|+|A3SS|75591600|75591712|75591615|75591712|75591171|75591246_DN
ENSG00000078304|PPP2R5C|chr14|+|MXE|101883256|101883349|101883431|101883562|101882160|101882271|101890236|101890296	-0.132	ENSG00000078304|PPP2R5C|chr14|+|MXE|101883256|101883349|101883431|101883562|101882160|101882271|101890236|101890296_DN
ENSG00000011275|RNF216|chr7|-|A3SS|5739275|5739621|5739275|5739352|5740972|5741644	-0.132	ENSG00000011275|RNF216|chr7|-|A3SS|5739275|5739621|5739275|5739352|5740972|5741644_DN
ENSG00000254788|CKLF-CMTM1|chr16|+|MXE|66558189|66558348|66563121|66563217|66552678|66552793|66577103|66577202	-0.131	ENSG00000254788|CKLF-CMTM1|chr16|+|MXE|66558189|66558348|66563121|66563217|66552678|66552793|66577103|66577202_DN
ENSG00000130779|CLIP1|chr12|-|SE|122351110|122351143|122347374|122347479|122352725|122352786	-0.131	ENSG00000130779|CLIP1|chr12|-|SE|122351110|122351143|122347374|122347479|122352725|122352786_DN
ENSG00000272886|DCP1A|chr3|-|SE|53304176|53304290|53292068|53292827|53312240|53312379	-0.131	ENSG00000272886|DCP1A|chr3|-|SE|53304176|53304290|53292068|53292827|53312240|53312379_DN
ENSG00000118513|MYB|chr6|+|SE|135196960|135197323|135196725|135196908|135198907|135199050	-0.131	ENSG00000118513|MYB|chr6|+|SE|135196960|135197323|135196725|135196908|135198907|135199050_DN
ENSG00000033030|ZCCHC8|chr12|-|SE|122483278|122483563|122482634|122482695|122489385|122489463	-0.131	ENSG00000033030|ZCCHC8|chr12|-|SE|122483278|122483563|122482634|122482695|122489385|122489463_DN
ENSG00000189046|ALKBH2|chr12|-|RI|109092506|109093472|109092506|109092787|109093246|109093472	-0.13	ENSG00000189046|ALKBH2|chr12|-|RI|109092506|109093472|109092506|109092787|109093246|109093472_DN
ENSG00000163930|BAP1|chr3|-|A3SS|52402778|52402940|52402778|52402871|52403137|52403298	-0.13	ENSG00000163930|BAP1|chr3|-|A3SS|52402778|52402940|52402778|52402871|52403137|52403298_DN
ENSG00000117335|CD46|chr1|+|SE|207767606|207767651|207767012|207767195|207767778|207767823	-0.13	ENSG00000117335|CD46|chr1|+|SE|207767606|207767651|207767012|207767195|207767778|207767823_DN
ENSG00000132463|GRSF1|chr4|-|SE|70831538|70831674|70827851|70828036|70832306|70832450	-0.13	ENSG00000132463|GRSF1|chr4|-|SE|70831538|70831674|70827851|70828036|70832306|70832450_DN
ENSG00000167085|PHB|chr17|-|SE|49414241|49414333|49413176|49413291|49414834|49414884	-0.13	ENSG00000167085|PHB|chr17|-|SE|49414241|49414333|49413176|49413291|49414834|49414884_DN
ENSG00000143514|TP53BP2|chr1|-|SE|223818205|223818337|223814239|223814353|223821219|223821367	-0.13	ENSG00000143514|TP53BP2|chr1|-|SE|223818205|223818337|223814239|223814353|223821219|223821367_DN
ENSG00000099785|MARCHF2|chr19|+|SE|8418741|8418807|8413294|8413420|8421788|8422016	-0.129	ENSG00000099785|MARCHF2|chr19|+|SE|8418741|8418807|8413294|8413420|8421788|8422016_DN
ENSG00000159346|ADIPOR1|chr1|-|SE|202954240|202954307|202950929|202951164|202958184|202958285	-0.129	ENSG00000159346|ADIPOR1|chr1|-|SE|202954240|202954307|202950929|202951164|202958184|202958285_DN
ENSG00000105483|CARD8|chr19|-|SE|48221729|48221855|48215137|48215384|48230437|48230647	-0.129	ENSG00000105483|CARD8|chr19|-|SE|48221729|48221855|48215137|48215384|48230437|48230647_DN
ENSG00000157181|ODR4|chr1|+|SE|186385987|186386083|186383021|186383156|186388441|186388548	-0.129	ENSG00000157181|ODR4|chr1|+|SE|186385987|186386083|186383021|186383156|186388441|186388548_DN
ENSG00000111445|RFC5|chr12|+|SE|118017689|118017815|118016700|118016892|118017994|118018053	-0.129	ENSG00000111445|RFC5|chr12|+|SE|118017689|118017815|118016700|118016892|118017994|118018053_DN
ENSG00000112701|SENP6|chr6|+|SE|75622750|75622858|75621531|75621625|75623899|75623960	-0.129	ENSG00000112701|SENP6|chr6|+|SE|75622750|75622858|75621531|75621625|75623899|75623960_DN
ENSG00000163374|YY1AP1|chr1|-|A3SS|155668626|155668777|155668626|155668717|155670319|155670464	-0.129	ENSG00000163374|YY1AP1|chr1|-|A3SS|155668626|155668777|155668626|155668717|155670319|155670464_DN
ENSG00000099622|CIRBP|chr19|+|SE|1273600|1273715|1271980|1272051|1274306|1274440	-0.128	ENSG00000099622|CIRBP|chr19|+|SE|1273600|1273715|1271980|1272051|1274306|1274440_DN
ENSG00000123179|EBPL|chr13|-|SE|49663056|49663195|49660722|49661208|49691253|49691438	-0.128	ENSG00000123179|EBPL|chr13|-|SE|49663056|49663195|49660722|49661208|49691253|49691438_DN
ENSG00000131979|GCH1|chr14|-|SE|54844000|54844143|54842007|54843054|54845767|54845852	-0.128	ENSG00000131979|GCH1|chr14|-|SE|54844000|54844143|54842007|54843054|54845767|54845852_DN
ENSG00000171988|JMJD1C|chr10|-|A3SS|63215552|63215696|63215552|63215617|63217206|63217331	-0.128	ENSG00000171988|JMJD1C|chr10|-|A3SS|63215552|63215696|63215552|63215617|63217206|63217331_DN
ENSG00000124588|NQO2|chr6|+|SE|3002049|3002286|2999973|3000085|3003668|3003789	-0.128	ENSG00000124588|NQO2|chr6|+|SE|3002049|3002286|2999973|3000085|3003668|3003789_DN
ENSG00000137776|SLTM|chr15|-|A3SS|58899468|58899937|58899468|58899883|58901259|58901287	-0.128	ENSG00000137776|SLTM|chr15|-|A3SS|58899468|58899937|58899468|58899883|58901259|58901287_DN
ENSG00000071189|SNX13|chr7|-|SE|17907248|17907340|17897333|17897446|17940283|17940488	-0.128	ENSG00000071189|SNX13|chr7|-|SE|17907248|17907340|17897333|17897446|17940283|17940488_DN
ENSG00000106610|STAG3L4|chr7|+|A3SS|67308576|67309139|67308934|67309139|67305986|67306083	-0.128	ENSG00000106610|STAG3L4|chr7|+|A3SS|67308576|67309139|67308934|67309139|67305986|67306083_DN
ENSG00000157954|WIPI2|chr7|+|SE|5193117|5193171|5190187|5190493|5199575|5199658	-0.128	ENSG00000157954|WIPI2|chr7|+|SE|5193117|5193171|5190187|5190493|5199575|5199658_DN
ENSG00000173209|AHSA2P|chr2|+|SE|61185979|61186081|61185501|61185618|61186445|61186497	-0.127	ENSG00000173209|AHSA2P|chr2|+|SE|61185979|61186081|61185501|61185618|61186445|61186497_DN
ENSG00000163319|MRPS18C|chr4|+|SE|83458345|83458429|83456908|83456958|83460972|83461032	-0.127	ENSG00000163319|MRPS18C|chr4|+|SE|83458345|83458429|83456908|83456958|83460972|83461032_DN
ENSG00000172890|NADSYN1|chr11|+|SE|71480218|71480274|71478394|71478469|71480754|71480879	-0.127	ENSG00000172890|NADSYN1|chr11|+|SE|71480218|71480274|71478394|71478469|71480754|71480879_DN
ENSG00000182628|SKA2|chr17|-|SE|59119318|59119495|59109950|59112345|59131280|59131367	-0.127	ENSG00000182628|SKA2|chr17|-|SE|59119318|59119495|59109950|59112345|59131280|59131367_DN
ENSG00000021574|SPAST|chr2|+|SE|32098800|32098891|32089521|32089605|32114637|32114825	-0.127	ENSG00000021574|SPAST|chr2|+|SE|32098800|32098891|32089521|32089605|32114637|32114825_DN
ENSG00000100697|DICER1|chr14|-|A3SS|95116452|95116695|95116452|95116580|95117621|95117754	-0.126	ENSG00000100697|DICER1|chr14|-|A3SS|95116452|95116695|95116452|95116580|95117621|95117754_DN
ENSG00000165792|METTL17|chr14|+|A3SS|20992091|20992205|20992123|20992205|20990463|20990598	-0.126	ENSG00000165792|METTL17|chr14|+|A3SS|20992091|20992205|20992123|20992205|20990463|20990598_DN
ENSG00000088205|DDX18|chr2|+|A3SS|117824939|117825101|117824996|117825101|117824568|117824708	-0.125	ENSG00000088205|DDX18|chr2|+|A3SS|117824939|117825101|117824996|117825101|117824568|117824708_DN
ENSG00000140374|ETFA|chr15|-|SE|76295590|76295737|76292430|76292513|76311349|76311396	-0.125	ENSG00000140374|ETFA|chr15|-|SE|76295590|76295737|76292430|76292513|76311349|76311396_DN
ENSG00000149925|ALDOA|chr16|+|SE|30065875|30065927|30064423|30064505|30067233|30067366	-0.124	ENSG00000149925|ALDOA|chr16|+|SE|30065875|30065927|30064423|30064505|30067233|30067366_DN
ENSG00000159140|SON|chr21|+|A3SS|33576364|33577481|33576417|33577481|33575777|33575893	-0.124	ENSG00000159140|SON|chr21|+|A3SS|33576364|33577481|33576417|33577481|33575777|33575893_DN
ENSG00000040531|CTNS|chr17|+|SE|3640187|3640267|3637103|3637316|3647443|3647522	-0.123	ENSG00000040531|CTNS|chr17|+|SE|3640187|3640267|3637103|3637316|3647443|3647522_DN
ENSG00000139436|GIT2|chr12|-|SE|109951166|109951316|109947255|109947504|109953091|109953234	-0.123	ENSG00000139436|GIT2|chr12|-|SE|109951166|109951316|109947255|109947504|109953091|109953234_DN
ENSG00000126214|KLC1|chr14|+|A5SS|103679383|103679545|103679383|103679518|103684985|103685036	-0.123	ENSG00000126214|KLC1|chr14|+|A5SS|103679383|103679545|103679383|103679518|103684985|103685036_DN
ENSG00000118513|MYB|chr6|+|A5SS|135196725|135197323|135196725|135196908|135198907|135199050	-0.123	ENSG00000118513|MYB|chr6|+|A5SS|135196725|135197323|135196725|135196908|135198907|135199050_DN
ENSG00000138593|SECISBP2L|chr15|-|A3SS|49035333|49035658|49035333|49035456|49037590|49037769	-0.123	ENSG00000138593|SECISBP2L|chr15|-|A3SS|49035333|49035658|49035333|49035456|49037590|49037769_DN
ENSG00000145907|G3BP1|chr5|+|A3SS|151786571|151786715|151786602|151786715|151771953|151772036	-0.122	ENSG00000145907|G3BP1|chr5|+|A3SS|151786571|151786715|151786602|151786715|151771953|151772036_DN
ENSG00000182149|IST1|chr16|+|SE|71924090|71924281|71923287|71923380|71924768|71924817	-0.122	ENSG00000182149|IST1|chr16|+|SE|71924090|71924281|71923287|71923380|71924768|71924817_DN
ENSG00000138434|ITPRID2|chr2|+|SE|181918322|181918470|181916721|181917005|181918597|181918675	-0.122	ENSG00000138434|ITPRID2|chr2|+|SE|181918322|181918470|181916721|181917005|181918597|181918675_DN
ENSG00000140521|POLG|chr15|-|A3SS|89317938|89318037|89317938|89317975|89318540|89318749	-0.122	ENSG00000140521|POLG|chr15|-|A3SS|89317938|89318037|89317938|89317975|89318540|89318749_DN
ENSG00000169972|PUSL1|chr1|+|SE|1308914|1308972|1308566|1308720|1309085|1309273	-0.122	ENSG00000169972|PUSL1|chr1|+|SE|1308914|1308972|1308566|1308720|1309085|1309273_DN
ENSG00000011451|WIZ|chr19|-|SE|15428109|15428508|15426981|15427533|15429585|15430089	-0.122	ENSG00000011451|WIZ|chr19|-|SE|15428109|15428508|15426981|15427533|15429585|15430089_DN
ENSG00000179335|CLK3|chr15|+|SE|74622119|74622560|74620008|74620225|74624901|74625018	-0.121	ENSG00000179335|CLK3|chr15|+|SE|74622119|74622560|74620008|74620225|74624901|74625018_DN
ENSG00000065427|KARS|chr16|-|SE|75644282|75644462|75641563|75641723|75647577|75647624	-0.121	ENSG00000065427|KARS|chr16|-|SE|75644282|75644462|75641563|75641723|75647577|75647624_DN
ENSG00000142687|KIAA0319L|chr1|-|SE|35506611|35507135|35478965|35479212|35554349|35554519	-0.121	ENSG00000142687|KIAA0319L|chr1|-|SE|35506611|35507135|35478965|35479212|35554349|35554519_DN
ENSG00000175061|LRRC75A-AS1|chr17|+|A3SS|16439580|16439703|16439659|16439703|16439326|16439414	-0.121	ENSG00000175061|LRRC75A-AS1|chr17|+|A3SS|16439580|16439703|16439659|16439703|16439326|16439414_DN
ENSG00000177084|POLE|chr12|-|A3SS|132676093|132676204|132676093|132676184|132676545|132676653	-0.121	ENSG00000177084|POLE|chr12|-|A3SS|132676093|132676204|132676093|132676184|132676545|132676653_DN
ENSG00000041357|PSMA4|chr15|+|MXE|78542482|78542645|78544189|78544267|78542176|78542219|78544868|78544957	-0.121	ENSG00000041357|PSMA4|chr15|+|MXE|78542482|78542645|78544189|78544267|78542176|78542219|78544868|78544957_DN
ENSG00000171777|RASGRP4|chr19|-|RI|38409057|38410096|38409057|38409370|38409954|38410096	-0.121	ENSG00000171777|RASGRP4|chr19|-|RI|38409057|38410096|38409057|38409370|38409954|38410096_DN
ENSG00000164329|TENT2|chr5|+|A3SS|79642831|79642910|79642843|79642910|79641104|79641196	-0.121	ENSG00000164329|TENT2|chr5|+|A3SS|79642831|79642910|79642843|79642910|79641104|79641196_DN
ENSG00000140367|UBE2Q2|chr15|+|SE|75859877|75859982|75854385|75854487|75868950|75869010	-0.121	ENSG00000140367|UBE2Q2|chr15|+|SE|75859877|75859982|75854385|75854487|75868950|75869010_DN
ENSG00000103507|BCKDK|chr16|+|RI|31111868|31112567|31111868|31112027|31112120|31112567	-0.12	ENSG00000103507|BCKDK|chr16|+|RI|31111868|31112567|31111868|31112027|31112120|31112567_DN
ENSG00000187796|CARD9|chr9|-|A3SS|136371894|136372094|136371894|136371970|136373531|136373644	-0.12	ENSG00000187796|CARD9|chr9|-|A3SS|136371894|136372094|136371894|136371970|136373531|136373644_DN
ENSG00000099622|CIRBP|chr19|+|SE|1273493|1273715|1271980|1272051|1274306|1274440	-0.12	ENSG00000099622|CIRBP|chr19|+|SE|1273493|1273715|1271980|1272051|1274306|1274440_DN
ENSG00000011304|PTBP1|chr19|+|SE|805491|805569|805012|805187|806407|806556	-0.12	ENSG00000011304|PTBP1|chr19|+|SE|805491|805569|805012|805187|806407|806556_DN
ENSG00000178307|TMEM11|chr17|-|SE|21210935|21211227|21197953|21198840|21214090|21214161	-0.12	ENSG00000178307|TMEM11|chr17|-|SE|21210935|21211227|21197953|21198840|21214090|21214161_DN
ENSG00000162174|ASRGL1|chr11|+|SE|62356324|62356467|62337889|62338167|62356986|62357132	-0.119	ENSG00000162174|ASRGL1|chr11|+|SE|62356324|62356467|62337889|62338167|62356986|62357132_DN
ENSG00000115459|ELMOD3|chr2|+|RI|85390137|85391748|85390137|85390265|85390759|85391748	-0.119	ENSG00000115459|ELMOD3|chr2|+|RI|85390137|85391748|85390137|85390265|85390759|85391748_DN
ENSG00000237765|FAM200B|chr4|+|A3SS|15686931|15687145|15687000|15687145|15686235|15686462	-0.119	ENSG00000237765|FAM200B|chr4|+|A3SS|15686931|15687145|15687000|15687145|15686235|15686462_DN
ENSG00000122417|ODF2L|chr1|-|SE|86368635|86368722|86360425|86360536|86371017|86371153	-0.119	ENSG00000122417|ODF2L|chr1|-|SE|86368635|86368722|86360425|86360536|86371017|86371153_DN
ENSG00000131876|SNRPA1|chr15|-|SE|101286213|101286293|101285725|101285801|101286907|101287010	-0.119	ENSG00000131876|SNRPA1|chr15|-|SE|101286213|101286293|101285725|101285801|101286907|101287010_DN
ENSG00000089053|ANAPC5|chr12|-|A3SS|121328315|121328497|121328315|121328458|121330582|121330672	-0.118	ENSG00000089053|ANAPC5|chr12|-|A3SS|121328315|121328497|121328315|121328458|121330582|121330672_DN
ENSG00000179632|MAF1|chr8|+|RI|144106342|144106674|144106342|144106464|144106554|144106674	-0.118	ENSG00000179632|MAF1|chr8|+|RI|144106342|144106674|144106342|144106464|144106554|144106674_DN
ENSG00000135297|MTO1|chr6|+|SE|73473364|73473654|73466488|73466606|73479731|73479844	-0.118	ENSG00000135297|MTO1|chr6|+|SE|73473364|73473654|73466488|73466606|73479731|73479844_DN
ENSG00000141068|KSR1|chr17|+|SE|27558045|27558187|27550567|27550708|27577491|27577639	-0.117	ENSG00000141068|KSR1|chr17|+|SE|27558045|27558187|27550567|27550708|27577491|27577639_DN
ENSG00000182628|SKA2|chr17|-|SE|59119298|59119495|59112090|59112345|59131280|59131367	-0.117	ENSG00000182628|SKA2|chr17|-|SE|59119298|59119495|59112090|59112345|59131280|59131367_DN
ENSG00000197912|SPG7|chr16|+|MXE|89536764|89536948|89540943|89541384|89532462|89532636|89544647|89544772	-0.117	ENSG00000197912|SPG7|chr16|+|MXE|89536764|89536948|89540943|89541384|89532462|89532636|89544647|89544772_DN
ENSG00000163319|MRPS18C|chr4|+|MXE|83458345|83458429|83459739|83459797|83456908|83456958|83460972|83461032	-0.116	ENSG00000163319|MRPS18C|chr4|+|MXE|83458345|83458429|83459739|83459797|83456908|83456958|83460972|83461032_DN
ENSG00000137497|NUMA1|chr11|-|MXE|72049418|72049539|72068078|72068231|72035901|72035975|72069841|72069911	-0.116	ENSG00000137497|NUMA1|chr11|-|MXE|72049418|72049539|72068078|72068231|72035901|72035975|72069841|72069911_DN
ENSG00000154710|RABGEF1|chr7|+|SE|66768830|66769025|66740732|66740792|66771882|66772078	-0.116	ENSG00000154710|RABGEF1|chr7|+|SE|66768830|66769025|66740732|66740792|66771882|66772078_DN
ENSG00000183765|CHEK2|chr22|-|SE|28703504|28703566|28699763|28699937|28710005|28710059	-0.115	ENSG00000183765|CHEK2|chr22|-|SE|28703504|28703566|28699763|28699937|28710005|28710059_DN
ENSG00000179335|CLK3|chr15|+|SE|74622493|74622560|74620008|74620225|74624901|74625018	-0.115	ENSG00000179335|CLK3|chr15|+|SE|74622493|74622560|74620008|74620225|74624901|74625018_DN
ENSG00000070371|CLTCL1|chr22|-|SE|19187557|19187728|19183389|19183611|19187980|19188091	-0.115	ENSG00000070371|CLTCL1|chr22|-|SE|19187557|19187728|19183389|19183611|19187980|19188091_DN
ENSG00000113742|CPEB4|chr5|+|SE|173943025|173943049|173932449|173932500|173944966|173945140	-0.115	ENSG00000113742|CPEB4|chr5|+|SE|173943025|173943049|173932449|173932500|173944966|173945140_DN
ENSG00000178927|CYBC1|chr17|-|SE|82449169|82449292|82446622|82446696|82450699|82450717	-0.115	ENSG00000178927|CYBC1|chr17|-|SE|82449169|82449292|82446622|82446696|82450699|82450717_DN
ENSG00000109184|DCUN1D4|chr4|+|SE|51905188|51905320|51899336|51899378|51911069|51911174	-0.115	ENSG00000109184|DCUN1D4|chr4|+|SE|51905188|51905320|51899336|51899378|51911069|51911174_DN
ENSG00000186431|FCAR|chr19|+|SE|54880835|54880913|54875329|54875365|54885234|54885525	-0.115	ENSG00000186431|FCAR|chr19|+|SE|54880835|54880913|54875329|54875365|54885234|54885525_DN
ENSG00000186792|HYAL3|chr3|-|A3SS|50294708|50295619|50294708|50294853|50299212|50299232	-0.115	ENSG00000186792|HYAL3|chr3|-|A3SS|50294708|50295619|50294708|50294853|50299212|50299232_DN
ENSG00000172005|MAL|chr2|+|MXE|95047958|95048126|95049580|95049706|95025792|95025885|95053380|95053992	-0.115	ENSG00000172005|MAL|chr2|+|MXE|95047958|95048126|95049580|95049706|95025792|95025885|95053380|95053992_DN
ENSG00000105223|PLD3|chr19|+|SE|40365661|40365930|40348699|40348768|40366418|40366510	-0.115	ENSG00000105223|PLD3|chr19|+|SE|40365661|40365930|40348699|40348768|40366418|40366510_DN
ENSG00000168214|RBPJ|chr4|+|SE|26362445|26362628|26320806|26321048|26386352|26386391	-0.115	ENSG00000168214|RBPJ|chr4|+|SE|26362445|26362628|26320806|26321048|26386352|26386391_DN
ENSG00000197912|SPG7|chr16|+|MXE|89536764|89536948|89540943|89541346|89532462|89532636|89544647|89544772	-0.115	ENSG00000197912|SPG7|chr16|+|MXE|89536764|89536948|89540943|89541346|89532462|89532636|89544647|89544772_DN
ENSG00000244627|TPTEP2|chr22|-|SE|38369985|38370045|38361398|38361560|38380369|38380423	-0.115	ENSG00000244627|TPTEP2|chr22|-|SE|38369985|38370045|38361398|38361560|38380369|38380423_DN
ENSG00000141552|ANAPC11|chr17|+|SE|81893551|81893614|81891731|81891833|81894466|81894586	-0.114	ENSG00000141552|ANAPC11|chr17|+|SE|81893551|81893614|81891731|81891833|81894466|81894586_DN
ENSG00000107262|BAG1|chr9|-|SE|33262104|33262246|33261086|33261169|33262701|33262830	-0.114	ENSG00000107262|BAG1|chr9|-|SE|33262104|33262246|33261086|33261169|33262701|33262830_DN
ENSG00000029363|BCLAF1|chr6|-|SE|136267028|136267175|136261264|136261477|136268161|136268273	-0.114	ENSG00000029363|BCLAF1|chr6|-|SE|136267028|136267175|136261264|136261477|136268161|136268273_DN
ENSG00000087470|DNM1L|chr12|+|SE|32737864|32737942|32737104|32737161|32738263|32738296	-0.114	ENSG00000087470|DNM1L|chr12|+|SE|32737864|32737942|32737104|32737161|32738263|32738296_DN
ENSG00000115523|GNLY|chr2|+|RI|85694752|85695423|85694752|85694923|85695319|85695423	-0.114	ENSG00000115523|GNLY|chr2|+|RI|85694752|85695423|85694752|85694923|85695319|85695423_DN
ENSG00000145979|TBC1D7|chr6|-|A3SS|13326786|13326963|13326786|13326906|13328455|13328531	-0.114	ENSG00000145979|TBC1D7|chr6|-|A3SS|13326786|13326963|13326786|13326906|13328455|13328531_DN
ENSG00000108840|HDAC5|chr17|-|MXE|44092171|44092284|44092380|44092527|44091699|44091831|44092675|44092806	-0.113	ENSG00000108840|HDAC5|chr17|-|MXE|44092171|44092284|44092380|44092527|44091699|44091831|44092675|44092806_DN
ENSG00000124523|SIRT5|chr6|+|SE|13588330|13588464|13584075|13584225|13591668|13591894	-0.113	ENSG00000124523|SIRT5|chr6|+|SE|13588330|13588464|13584075|13584225|13591668|13591894_DN
ENSG00000125835|SNRPB|chr20|-|A3SS|2461633|2461939|2461633|2461793|2462635|2462761	-0.113	ENSG00000125835|SNRPB|chr20|-|A3SS|2461633|2461939|2461633|2461793|2462635|2462761_DN
ENSG00000104043|ATP8B4|chr15|-|SE|49931118|49931307|49923378|49923494|49934016|49934182	-0.112	ENSG00000104043|ATP8B4|chr15|-|SE|49931118|49931307|49923378|49923494|49934016|49934182_DN
ENSG00000141577|CEP131|chr17|-|A3SS|81191192|81191350|81191192|81191335|81192317|81192392	-0.112	ENSG00000141577|CEP131|chr17|-|A3SS|81191192|81191350|81191192|81191335|81192317|81192392_DN
ENSG00000240344|PPIL3|chr2|-|MXE|200882341|200882382|200885261|200885367|200881420|200881488|200885697|200885772	-0.112	ENSG00000240344|PPIL3|chr2|-|MXE|200882341|200882382|200885261|200885367|200881420|200881488|200885697|200885772_DN
ENSG00000185485|SDHAP1|chr3|-|A3SS|195965428|195965577|195965428|195965542|195967513|195967644	-0.112	ENSG00000185485|SDHAP1|chr3|-|A3SS|195965428|195965577|195965428|195965542|195967513|195967644_DN
ENSG00000134779|TPGS2|chr18|-|SE|36805373|36805397|36800197|36800311|36807846|36807934	-0.112	ENSG00000134779|TPGS2|chr18|-|SE|36805373|36805397|36800197|36800311|36807846|36807934_DN
ENSG00000116747|TROVE2|chr1|+|SE|193069033|193069181|193059618|193059776|193075819|193075890	-0.112	ENSG00000116747|TROVE2|chr1|+|SE|193069033|193069181|193059618|193059776|193075819|193075890_DN
ENSG00000170791|CHCHD7|chr8|+|A3SS|56216388|56216506|56216432|56216506|56214597|56214667	-0.111	ENSG00000170791|CHCHD7|chr8|+|A3SS|56216388|56216506|56216432|56216506|56214597|56214667_DN
ENSG00000133317|LGALS12|chr11|+|A3SS|63508774|63508991|63508777|63508991|63508552|63508641	-0.111	ENSG00000133317|LGALS12|chr11|+|A3SS|63508774|63508991|63508777|63508991|63508552|63508641_DN
ENSG00000123349|PFDN5|chr12|+|RI|53296429|53297924|53296429|53296551|53297849|53297924	-0.111	ENSG00000123349|PFDN5|chr12|+|RI|53296429|53297924|53296429|53296551|53297849|53297924_DN
ENSG00000214413|BBIP1|chr10|-|SE|110918120|110918213|110901537|110901612|110919120|110919157	-0.11	ENSG00000214413|BBIP1|chr10|-|SE|110918120|110918213|110901537|110901612|110919120|110919157_DN
ENSG00000115677|HDLBP|chr2|-|SE|241269200|241269295|241268476|241268541|241272760|241272812	-0.11	ENSG00000115677|HDLBP|chr2|-|SE|241269200|241269295|241268476|241268541|241272760|241272812_DN
ENSG00000215041|NEURL4|chr17|-|A5SS|7322947|7323123|7322953|7323123|7322734|7322866	-0.11	ENSG00000215041|NEURL4|chr17|-|A5SS|7322947|7323123|7322953|7323123|7322734|7322866_DN
ENSG00000121716|PILRB|chr7|+|A3SS|100356393|100356883|100356749|100356883|100355142|100355240	-0.11	ENSG00000121716|PILRB|chr7|+|A3SS|100356393|100356883|100356749|100356883|100355142|100355240_DN
ENSG00000108064|TFAM|chr10|+|SE|58390764|58390860|58388669|58388819|58394357|58394414	-0.11	ENSG00000108064|TFAM|chr10|+|SE|58390764|58390860|58388669|58388819|58394357|58394414_DN
ENSG00000064115|TM7SF3|chr12|-|SE|27003235|27003405|26999588|26999676|27014077|27014398	-0.11	ENSG00000064115|TM7SF3|chr12|-|SE|27003235|27003405|26999588|26999676|27014077|27014398_DN
ENSG00000177479|ARIH2|chr3|+|MXE|48924717|48924839|48945135|48945181|48922747|48922811|48961611|48961679	-0.109	ENSG00000177479|ARIH2|chr3|+|MXE|48924717|48924839|48945135|48945181|48922747|48922811|48961611|48961679_DN
ENSG00000110619|CARS|chr11|-|A3SS|3001969|3002174|3001969|3002053|3002540|3002600	-0.109	ENSG00000110619|CARS|chr11|-|A3SS|3001969|3002174|3001969|3002053|3002540|3002600_DN
ENSG00000122218|COPA|chr1|-|SE|160299101|160299264|160297555|160297745|160305432|160305571	-0.109	ENSG00000122218|COPA|chr1|-|SE|160299101|160299264|160297555|160297745|160305432|160305571_DN
ENSG00000141034|GID4|chr17|+|SE|18056702|18056759|18054147|18054234|18058867|18058969	-0.109	ENSG00000141034|GID4|chr17|+|SE|18056702|18056759|18054147|18054234|18058867|18058969_DN
ENSG00000115677|HDLBP|chr2|-|SE|241268828|241269295|241268498|241268541|241272760|241272831	-0.109	ENSG00000115677|HDLBP|chr2|-|SE|241268828|241269295|241268498|241268541|241272760|241272831_DN
ENSG00000075413|MARK3|chr14|+|SE|103465556|103465793|103462404|103462461|103465971|103466091	-0.109	ENSG00000075413|MARK3|chr14|+|SE|103465556|103465793|103462404|103462461|103465971|103466091_DN
ENSG00000225663|MCRIP1|chr17|-|SE|81826379|81826515|81824498|81824554|81833237|81833256	-0.109	ENSG00000225663|MCRIP1|chr17|-|SE|81826379|81826515|81824498|81824554|81833237|81833256_DN
ENSG00000062822|POLD1|chr19|+|SE|50395024|50395150|50384341|50384390|50398850|50399053	-0.109	ENSG00000062822|POLD1|chr19|+|SE|50395024|50395150|50384341|50384390|50398850|50399053_DN
ENSG00000186141|POLR3C|chr1|+|RI|145826453|145826709|145826453|145826492|145826605|145826709	-0.109	ENSG00000186141|POLR3C|chr1|+|RI|145826453|145826709|145826453|145826492|145826605|145826709_DN
ENSG00000179912|R3HDM2|chr12|-|SE|57292571|57292667|57283823|57284056|57295398|57295507	-0.109	ENSG00000179912|R3HDM2|chr12|-|SE|57292571|57292667|57283823|57284056|57295398|57295507_DN
ENSG00000125089|SH3TC1|chr4|+|SE|8215171|8215242|8214562|8214580|8216110|8216257	-0.109	ENSG00000125089|SH3TC1|chr4|+|SE|8215171|8215242|8214562|8214580|8216110|8216257_DN
ENSG00000229180|AC006001.3|chr7|-|SE|66560578|66560675|66554584|66554837|66573384|66573550	-0.108	ENSG00000229180|AC006001.3|chr7|-|SE|66560578|66560675|66554584|66554837|66573384|66573550_DN
ENSG00000133805|AMPD3|chr11|+|A3SS|10504548|10504659|10504579|10504659|10502720|10502894	-0.108	ENSG00000133805|AMPD3|chr11|+|A3SS|10504548|10504659|10504579|10504659|10502720|10502894_DN
ENSG00000011426|ANLN|chr7|+|SE|36417079|36417190|36415757|36415884|36419243|36419479	-0.108	ENSG00000011426|ANLN|chr7|+|SE|36417079|36417190|36415757|36415884|36419243|36419479_DN
ENSG00000168374|ARF4|chr3|-|SE|57583897|57584032|57577315|57577387|57584383|57584464	-0.108	ENSG00000168374|ARF4|chr3|-|SE|57583897|57584032|57577315|57577387|57584383|57584464_DN
ENSG00000064961|HMG20B|chr19|+|RI|3572978|3573347|3572978|3572994|3573291|3573347	-0.108	ENSG00000064961|HMG20B|chr19|+|RI|3572978|3573347|3572978|3572994|3573291|3573347_DN
ENSG00000117691|NENF|chr1|+|SE|212442545|212442625|212432972|212433120|212444338|212444442	-0.108	ENSG00000117691|NENF|chr1|+|SE|212442545|212442625|212432972|212433120|212444338|212444442_DN
ENSG00000177989|ODF3B|chr22|-|SE|50531569|50531773|50531190|50531295|50531968|50532077	-0.108	ENSG00000177989|ODF3B|chr22|-|SE|50531569|50531773|50531190|50531295|50531968|50532077_DN
ENSG00000051382|PIK3CB|chr3|-|MXE|138704442|138704493|138707158|138707289|138698906|138699095|138712207|138712304	-0.108	ENSG00000051382|PIK3CB|chr3|-|MXE|138704442|138704493|138707158|138707289|138698906|138699095|138712207|138712304_DN
ENSG00000156735|BAG4|chr8|+|SE|38192687|38192795|38176598|38177139|38207511|38207741	-0.107	ENSG00000156735|BAG4|chr8|+|SE|38192687|38192795|38176598|38177139|38207511|38207741_DN
ENSG00000100226|GTPBP1|chr22|+|SE|38708844|38708956|38705722|38706147|38715906|38715962	-0.107	ENSG00000100226|GTPBP1|chr22|+|SE|38708844|38708956|38705722|38706147|38715906|38715962_DN
ENSG00000067064|IDI1|chr10|-|SE|1043998|1044171|1043300|1043393|1048863|1049170	-0.107	ENSG00000067064|IDI1|chr10|-|SE|1043998|1044171|1043300|1043393|1048863|1049170_DN
ENSG00000160712|IL6R|chr1|+|SE|154445046|154445094|154435968|154436110|154448124|154448171	-0.107	ENSG00000160712|IL6R|chr1|+|SE|154445046|154445094|154435968|154436110|154448124|154448171_DN
ENSG00000131828|PDHA1|chrX|+|SE|19354490|19354583|19352828|19353173|19355348|19355445	-0.107	ENSG00000131828|PDHA1|chrX|+|SE|19354490|19354583|19352828|19353173|19355348|19355445_DN
ENSG00000141084|RANBP10|chr16|-|MXE|67772033|67772086|67805427|67805539|67744287|67744455|67806301|67806560	-0.107	ENSG00000141084|RANBP10|chr16|-|MXE|67772033|67772086|67805427|67805539|67744287|67744455|67806301|67806560_DN
ENSG00000239998|LILRA2|chr19|+|SE|54573697|54573912|54573027|54573435|54574075|54574111	-0.106	ENSG00000239998|LILRA2|chr19|+|SE|54573697|54573912|54573027|54573435|54574075|54574111_DN
ENSG00000118308|LRMP|chr12|+|SE|25061591|25061653|25052511|25052956|25062819|25062900	-0.106	ENSG00000118308|LRMP|chr12|+|SE|25061591|25061653|25052511|25052956|25062819|25062900_DN
ENSG00000221983|UBA52|chr19|+|SE|18572350|18572607|18571854|18571887|18573292|18573403	-0.106	ENSG00000221983|UBA52|chr19|+|SE|18572350|18572607|18571854|18571887|18573292|18573403_DN
ENSG00000127463|EMC1|chr1|-|A3SS|19220763|19220848|19220763|19220810|19222623|19222834	-0.105	ENSG00000127463|EMC1|chr1|-|A3SS|19220763|19220848|19220763|19220810|19222623|19222834_DN
ENSG00000093000|NUP50|chr22|+|SE|45170987|45171177|45168165|45168246|45171599|45171683	-0.105	ENSG00000093000|NUP50|chr22|+|SE|45170987|45171177|45168165|45168246|45171599|45171683_DN
ENSG00000154845|PPP4R1|chr18|-|A3SS|9550277|9550398|9550277|9550315|9553321|9553422	-0.105	ENSG00000154845|PPP4R1|chr18|-|A3SS|9550277|9550398|9550277|9550315|9553321|9553422_DN
ENSG00000122490|PQLC1|chr18|-|A3SS|79949518|79949655|79949518|79949636|79950723|79951025	-0.105	ENSG00000122490|PQLC1|chr18|-|A3SS|79949518|79949655|79949518|79949636|79950723|79951025_DN
ENSG00000197694|SPTAN1|chr9|+|SE|128609650|128609665|128609121|128609284|128611713|128611845	-0.105	ENSG00000197694|SPTAN1|chr9|+|SE|128609650|128609665|128609121|128609284|128611713|128611845_DN
ENSG00000148737|TCF7L2|chr10|+|A3SS|113150982|113151123|113150997|113151123|113146010|113146097	-0.105	ENSG00000148737|TCF7L2|chr10|+|A3SS|113150982|113151123|113150997|113151123|113146010|113146097_DN
ENSG00000198176|TFDP1|chr13|+|SE|113631622|113631744|113623179|113623286|113633119|113633285	-0.105	ENSG00000198176|TFDP1|chr13|+|SE|113631622|113631744|113623179|113623286|113633119|113633285_DN
ENSG00000100749|VRK1|chr14|+|SE|96877501|96877573|96876028|96876120|96881176|96881259	-0.105	ENSG00000100749|VRK1|chr14|+|SE|96877501|96877573|96876028|96876120|96881176|96881259_DN
ENSG00000162923|WDR26|chr1|-|A5SS|224431476|224431581|224431524|224431581|224424517|224424654	-0.105	ENSG00000162923|WDR26|chr1|-|A5SS|224431476|224431581|224431524|224431581|224424517|224424654_DN
ENSG00000118260|CREB1|chr2|+|SE|207577109|207577224|207576630|207576693|207577504|207577655	-0.104	ENSG00000118260|CREB1|chr2|+|SE|207577109|207577224|207576630|207576693|207577504|207577655_DN
ENSG00000151806|GUF1|chr4|+|SE|44680440|44680552|44678428|44678787|44680693|44680842	-0.104	ENSG00000151806|GUF1|chr4|+|SE|44680440|44680552|44678428|44678787|44680693|44680842_DN
ENSG00000078596|ITM2A|chrX|-|SE|79363422|79363554|79362941|79363139|79367104|79367359	-0.104	ENSG00000078596|ITM2A|chrX|-|SE|79363422|79363554|79362941|79363139|79367104|79367359_DN
ENSG00000164219|PGGT1B|chr5|-|SE|115221823|115222008|115216864|115216973|115230975|115231021	-0.104	ENSG00000164219|PGGT1B|chr5|-|SE|115221823|115222008|115216864|115216973|115230975|115231021_DN
ENSG00000105223|PLD3|chr19|+|SE|40365552|40365930|40348689|40348768|40366418|40366464	-0.104	ENSG00000105223|PLD3|chr19|+|SE|40365552|40365930|40348689|40348768|40366418|40366464_DN
ENSG00000172794|RAB37|chr17|+|SE|74740767|74740878|74737216|74737365|74742253|74742295	-0.104	ENSG00000172794|RAB37|chr17|+|SE|74740767|74740878|74737216|74737365|74742253|74742295_DN
ENSG00000023191|RNH1|chr11|-|SE|504823|504888|502061|502249|506608|506759	-0.104	ENSG00000023191|RNH1|chr11|-|SE|504823|504888|502061|502249|506608|506759_DN
ENSG00000179134|SAMD4B|chr19|+|SE|39354005|39354066|39342395|39342576|39356688|39357089	-0.104	ENSG00000179134|SAMD4B|chr19|+|SE|39354005|39354066|39342395|39342576|39356688|39357089_DN
ENSG00000135926|TMBIM1|chr2|-|SE|218285762|218285934|218281939|218282181|218292465|218292535	-0.104	ENSG00000135926|TMBIM1|chr2|-|SE|218285762|218285934|218281939|218282181|218292465|218292535_DN
ENSG00000141030|COPS3|chr17|-|SE|17276034|17276183|17270895|17271008|17281131|17281191	-0.103	ENSG00000141030|COPS3|chr17|-|SE|17276034|17276183|17270895|17271008|17281131|17281191_DN
ENSG00000132305|IMMT|chr2|-|A3SS|86171207|86171381|86171207|86171312|86173649|86173761	-0.103	ENSG00000132305|IMMT|chr2|-|A3SS|86171207|86171381|86171207|86171312|86173649|86173761_DN
ENSG00000198625|MDM4|chr1|+|SE|204544534|204544684|204542783|204542944|204546796|204546832	-0.103	ENSG00000198625|MDM4|chr1|+|SE|204544534|204544684|204542783|204542944|204546796|204546832_DN
ENSG00000172766|NAA16|chr13|+|SE|41336649|41336756|41331273|41331369|41355143|41355216	-0.103	ENSG00000172766|NAA16|chr13|+|SE|41336649|41336756|41331273|41331369|41355143|41355216_DN
ENSG00000123349|PFDN5|chr12|+|SE|53295838|53295941|53295290|53295639|53297849|53297924	-0.103	ENSG00000123349|PFDN5|chr12|+|SE|53295838|53295941|53295290|53295639|53297849|53297924_DN
ENSG00000114302|PRKAR2A|chr3|-|SE|48752175|48752317|48746578|48751718|48756378|48756444	-0.103	ENSG00000114302|PRKAR2A|chr3|-|SE|48752175|48752317|48746578|48751718|48756378|48756444_DN
ENSG00000204152|TIMM23B|chr10|+|SE|49945031|49945090|49942032|49942300|49952125|49952219	-0.103	ENSG00000204152|TIMM23B|chr10|+|SE|49945031|49945090|49942032|49942300|49952125|49952219_DN
ENSG00000135926|TMBIM1|chr2|-|SE|218285762|218285938|218281939|218282181|218292465|218292529	-0.103	ENSG00000135926|TMBIM1|chr2|-|SE|218285762|218285938|218281939|218282181|218292465|218292529_DN
ENSG00000126261|UBA2|chr19|+|SE|34430575|34430659|34428362|34428570|34431860|34431931	-0.103	ENSG00000126261|UBA2|chr19|+|SE|34430575|34430659|34428362|34428570|34431860|34431931_DN
ENSG00000244687|UBE2V1|chr20|-|SE|50096671|50096820|50083877|50084254|50113106|50113125	-0.103	ENSG00000244687|UBE2V1|chr20|-|SE|50096671|50096820|50083877|50084254|50113106|50113125_DN
ENSG00000100852|ARHGAP5|chr14|+|SE|32117139|32117287|32090501|32094386|32146262|32146340	-0.102	ENSG00000100852|ARHGAP5|chr14|+|SE|32117139|32117287|32090501|32094386|32146262|32146340_DN
ENSG00000134574|DDB2|chr11|+|A3SS|47234756|47235412|47235269|47235412|47234572|47234672	-0.102	ENSG00000134574|DDB2|chr11|+|A3SS|47234756|47235412|47235269|47235412|47234572|47234672_DN
ENSG00000117543|DPH5|chr1|-|SE|100992636|100992740|100989622|100990631|100995109|100995149	-0.102	ENSG00000117543|DPH5|chr1|-|SE|100992636|100992740|100989622|100990631|100995109|100995149_DN
ENSG00000131187|F12|chr5|-|RI|177403480|177404472|177403480|177404090|177404195|177404472	-0.102	ENSG00000131187|F12|chr5|-|RI|177403480|177404472|177403480|177404090|177404195|177404472_DN
ENSG00000165630|PRPF18|chr10|+|SE|13591767|13591888|13586938|13587152|13597457|13597535	-0.102	ENSG00000165630|PRPF18|chr10|+|SE|13591767|13591888|13586938|13587152|13597457|13597535_DN
ENSG00000160948|VPS28|chr8|-|RI|144424945|144425772|144424945|144425000|144425682|144425772	-0.102	ENSG00000160948|VPS28|chr8|-|RI|144424945|144425772|144424945|144425000|144425682|144425772_DN
ENSG00000132953|XPO4|chr13|-|SE|20862968|20863123|20862716|20862858|20868595|20868701	-0.102	ENSG00000132953|XPO4|chr13|-|SE|20862968|20863123|20862716|20862858|20868595|20868701_DN
ENSG00000168374|ARF4|chr3|-|SE|57583897|57584007|57577315|57577387|57597073|57597325	-0.101	ENSG00000168374|ARF4|chr3|-|SE|57583897|57584007|57577315|57577387|57597073|57597325_DN
ENSG00000133657|ATP13A3|chr3|-|SE|194457093|194457174|194455892|194455962|194459470|194459541	-0.101	ENSG00000133657|ATP13A3|chr3|-|SE|194457093|194457174|194455892|194455962|194459470|194459541_DN
ENSG00000158850|B4GALT3|chr1|-|RI|161176433|161177106|161176433|161176579|161176911|161177106	-0.101	ENSG00000158850|B4GALT3|chr1|-|RI|161176433|161177106|161176433|161176579|161176911|161177106_DN
ENSG00000119950|MXI1|chr10|+|SE|110244827|110244873|110228188|110228321|110279179|110279294	-0.101	ENSG00000119950|MXI1|chr10|+|SE|110244827|110244873|110228188|110228321|110279179|110279294_DN
ENSG00000138621|PPCDC|chr15|+|SE|75028246|75028453|75023554|75023626|75043440|75043536	-0.101	ENSG00000138621|PPCDC|chr15|+|SE|75028246|75028453|75023554|75023626|75043440|75043536_DN
ENSG00000130175|PRKCSH|chr19|+|A3SS|11447692|11447789|11447722|11447789|11447438|11447618	-0.101	ENSG00000130175|PRKCSH|chr19|+|A3SS|11447692|11447789|11447722|11447789|11447438|11447618_DN
ENSG00000149150|SLC43A1|chr11|-|SE|57515099|57515201|57513957|57514124|57515443|57515686	-0.101	ENSG00000149150|SLC43A1|chr11|-|SE|57515099|57515201|57513957|57514124|57515443|57515686_DN
ENSG00000162341|TPCN2|chr11|+|SE|69085209|69085286|69083944|69084016|69085670|69085752	-0.101	ENSG00000162341|TPCN2|chr11|+|SE|69085209|69085286|69083944|69084016|69085670|69085752_DN
ENSG00000110619|CARS|chr11|-|RI|3001969|3002600|3001969|3002053|3002540|3002600	-0.1	ENSG00000110619|CARS|chr11|-|RI|3001969|3002600|3001969|3002053|3002540|3002600_DN
ENSG00000085063|CD59|chr11|-|SE|33733494|33733614|33731423|33731468|33736381|33736422	-0.1	ENSG00000085063|CD59|chr11|-|SE|33733494|33733614|33731423|33731468|33736381|33736422_DN
ENSG00000087470|DNM1L|chr12|+|MXE|32737864|32737942|32738263|32738296|32737104|32737161|32740063|32740240	-0.1	ENSG00000087470|DNM1L|chr12|+|MXE|32737864|32737942|32738263|32738296|32737104|32737161|32740063|32740240_DN
ENSG00000105700|KXD1|chr19|+|SE|18560419|18560550|18557761|18557914|18562035|18562157	-0.1	ENSG00000105700|KXD1|chr19|+|SE|18560419|18560550|18557761|18557914|18562035|18562157_DN
ENSG00000116977|LGALS8|chr1|+|SE|236540563|236540683|236538878|236539089|236541653|236541691	-0.1	ENSG00000116977|LGALS8|chr1|+|SE|236540563|236540683|236538878|236539089|236541653|236541691_DN
ENSG00000162591|MEGF6|chr1|-|MXE|3493770|3493797|3493995|3494124|3492638|3492767|3494370|3494499	-0.1	ENSG00000162591|MEGF6|chr1|-|MXE|3493770|3493797|3493995|3494124|3492638|3492767|3494370|3494499_DN
ENSG00000141279|NPEPPS|chr17|+|SE|47586147|47586244|47585499|47585745|47586364|47586398	-0.1	ENSG00000141279|NPEPPS|chr17|+|SE|47586147|47586244|47585499|47585745|47586364|47586398_DN
ENSG00000137497|NUMA1|chr11|-|SE|72068104|72068231|72035901|72035975|72069841|72070063	-0.1	ENSG00000137497|NUMA1|chr11|-|SE|72068104|72068231|72035901|72035975|72069841|72070063_DN
ENSG00000013561|RNF14|chr5|+|SE|141980122|141980351|141973582|141973742|141983379|141983552	-0.1	ENSG00000013561|RNF14|chr5|+|SE|141980122|141980351|141973582|141973742|141983379|141983552_DN
ENSG00000205413|SAMD9|chr7|-|SE|93114794|93114895|93099515|93106105|93117862|93118023	-0.1	ENSG00000205413|SAMD9|chr7|-|SE|93114794|93114895|93099515|93106105|93117862|93118023_DN
ENSG00000077097|TOP2B|chr3|-|SE|25618417|25618509|25615430|25615586|25618653|25618849	-0.1	ENSG00000077097|TOP2B|chr3|-|SE|25618417|25618509|25615430|25615586|25618653|25618849_DN
ENSG00000038002|AGA|chr4|-|SE|177436275|177436351|177434381|177434489|177437404|177437519	-0.099	ENSG00000038002|AGA|chr4|-|SE|177436275|177436351|177434381|177434489|177437404|177437519_DN
ENSG00000166199|ALKBH3|chr11|+|MXE|43892040|43892129|43897194|43897354|43889724|43889828|43901515|43901725	-0.099	ENSG00000166199|ALKBH3|chr11|+|MXE|43892040|43892129|43897194|43897354|43889724|43889828|43901515|43901725_DN
ENSG00000182923|CEP63|chr3|+|SE|134547334|134547472|134546148|134546288|134549061|134549176	-0.099	ENSG00000182923|CEP63|chr3|+|SE|134547334|134547472|134546148|134546288|134549061|134549176_DN
ENSG00000099783|HNRNPM|chr19|+|RI|8465323|8465515|8465323|8465362|8465479|8465515	-0.099	ENSG00000099783|HNRNPM|chr19|+|RI|8465323|8465515|8465323|8465362|8465479|8465515_DN
ENSG00000123562|MORF4L2|chrX|-|SE|103684680|103684729|103678498|103678600|103685170|103685260	-0.099	ENSG00000123562|MORF4L2|chrX|-|SE|103684680|103684729|103678498|103678600|103685170|103685260_DN
ENSG00000198951|NAGA|chr22|-|RI|42070281|42070830|42070281|42070366|42070762|42070830	-0.099	ENSG00000198951|NAGA|chr22|-|RI|42070281|42070830|42070281|42070366|42070762|42070830_DN
ENSG00000101166|PRELID3B|chr20|-|SE|59037190|59037299|59036689|59036760|59038465|59038634	-0.099	ENSG00000101166|PRELID3B|chr20|-|SE|59037190|59037299|59036689|59036760|59038465|59038634_DN
ENSG00000272752|STAG3L5P-PVRIG2P-PILRB|chr7|+|A3SS|100358689|100359079|100358898|100359079|100358219|100358366	-0.099	ENSG00000272752|STAG3L5P-PVRIG2P-PILRB|chr7|+|A3SS|100358689|100359079|100358898|100359079|100358219|100358366_DN
ENSG00000178927|CYBC1|chr17|-|SE|82447579|82447621|82446622|82446696|82449169|82449292	-0.098	ENSG00000178927|CYBC1|chr17|-|SE|82447579|82447621|82446622|82446696|82449169|82449292_DN
ENSG00000133106|EPSTI1|chr13|-|SE|42970611|42970670|42969093|42969177|42991977|42992165	-0.098	ENSG00000133106|EPSTI1|chr13|-|SE|42970611|42970670|42969093|42969177|42991977|42992165_DN
ENSG00000163808|KIF15|chr3|+|SE|44774394|44774437|44761716|44761884|44775253|44775437	-0.098	ENSG00000163808|KIF15|chr3|+|SE|44774394|44774437|44761716|44761884|44775253|44775437_DN
ENSG00000105819|PMPCB|chr7|+|SE|103307595|103307708|103304410|103304490|103308951|103309095	-0.098	ENSG00000105819|PMPCB|chr7|+|SE|103307595|103307708|103304410|103304490|103308951|103309095_DN
ENSG00000090905|TNRC6A|chr16|+|MXE|24815146|24815305|24815354|24815475|24809349|24809481|24816815|24816956	-0.098	ENSG00000090905|TNRC6A|chr16|+|MXE|24815146|24815305|24815354|24815475|24809349|24809481|24816815|24816956_DN
ENSG00000111653|ING4|chr12|-|RI|6652270|6652770|6652270|6652309|6652661|6652770	-0.097	ENSG00000111653|ING4|chr12|-|RI|6652270|6652770|6652270|6652309|6652661|6652770_DN
ENSG00000166986|MARS|chr12|+|RI|57512007|57512353|57512007|57512103|57512302|57512353	-0.097	ENSG00000166986|MARS|chr12|+|RI|57512007|57512353|57512007|57512103|57512302|57512353_DN
ENSG00000057252|SOAT1|chr1|+|MXE|179302676|179302802|179323436|179323495|179293713|179293936|179335505|179335657	-0.097	ENSG00000057252|SOAT1|chr1|+|MXE|179302676|179302802|179323436|179323495|179293713|179293936|179335505|179335657_DN
ENSG00000106610|STAG3L4|chr7|+|SE|67308576|67308652|67305986|67306083|67308934|67309139	-0.097	ENSG00000106610|STAG3L4|chr7|+|SE|67308576|67308652|67305986|67306083|67308934|67309139_DN
ENSG00000121749|TBC1D15|chr12|+|SE|71841100|71841231|71839706|71839811|71872069|71872168	-0.097	ENSG00000121749|TBC1D15|chr12|+|SE|71841100|71841231|71839706|71839811|71872069|71872168_DN
ENSG00000284634|AC092821.3|chr12|+|SE|9656567|9656649|9655872|9655979|9656920|9657302	-0.096	ENSG00000284634|AC092821.3|chr12|+|SE|9656567|9656649|9655872|9655979|9656920|9657302_DN
ENSG00000011243|AKAP8L|chr19|-|RI|15403474|15403715|15403474|15403555|15403657|15403715	-0.096	ENSG00000011243|AKAP8L|chr19|-|RI|15403474|15403715|15403474|15403555|15403657|15403715_DN
ENSG00000105700|KXD1|chr19|+|SE|18560099|18560550|18557897|18557914|18562035|18562157	-0.096	ENSG00000105700|KXD1|chr19|+|SE|18560099|18560550|18557897|18557914|18562035|18562157_DN
ENSG00000116871|MAP7D1|chr1|+|RI|36176198|36176581|36176198|36176321|36176417|36176581	-0.096	ENSG00000116871|MAP7D1|chr1|+|RI|36176198|36176581|36176198|36176321|36176417|36176581_DN
ENSG00000130731|METTL26|chr16|-|MXE|634888|634956|635280|635340|634718|634797|635611|635774	-0.096	ENSG00000130731|METTL26|chr16|-|MXE|634888|634956|635280|635340|634718|634797|635611|635774_DN
ENSG00000104497|SNX16|chr8|-|RI|81839611|81840082|81839611|81839751|81839838|81840082	-0.096	ENSG00000104497|SNX16|chr8|-|RI|81839611|81840082|81839611|81839751|81839838|81840082_DN
ENSG00000182718|ANXA2|chr15|-|SE|60397257|60397338|60386027|60386086|60397942|60397964	-0.095	ENSG00000182718|ANXA2|chr15|-|SE|60397257|60397338|60386027|60386086|60397942|60397964_DN
ENSG00000168000|BSCL2|chr11|-|A5SS|62706202|62706344|62706258|62706344|62705300|62705617	-0.095	ENSG00000168000|BSCL2|chr11|-|A5SS|62706202|62706344|62706258|62706344|62705300|62705617_DN
ENSG00000136861|CDK5RAP2|chr9|-|SE|120460571|120460667|120458449|120458622|120467859|120467997	-0.095	ENSG00000136861|CDK5RAP2|chr9|-|SE|120460571|120460667|120458449|120458622|120467859|120467997_DN
ENSG00000005339|CREBBP|chr16|-|SE|3777612|3777657|3774568|3774693|3778010|3778172	-0.095	ENSG00000005339|CREBBP|chr16|-|SE|3777612|3777657|3774568|3774693|3778010|3778172_DN
ENSG00000113712|CSNK1A1|chr5|-|SE|149511793|149511872|149509878|149509953|149513069|149513120	-0.095	ENSG00000113712|CSNK1A1|chr5|-|SE|149511793|149511872|149509878|149509953|149513069|149513120_DN
ENSG00000141551|CSNK1D|chr17|-|SE|82255428|82255577|82253015|82253244|82265685|82265796	-0.095	ENSG00000141551|CSNK1D|chr17|-|SE|82255428|82255577|82253015|82253244|82265685|82265796_DN
ENSG00000095485|CWF19L1|chr10|-|A3SS|100260965|100261044|100260965|100261028|100261978|100262063	-0.095	ENSG00000095485|CWF19L1|chr10|-|A3SS|100260965|100261044|100260965|100261028|100261978|100262063_DN
ENSG00000159147|DONSON|chr21|-|SE|33587521|33587602|33585977|33586181|33588320|33588646	-0.095	ENSG00000159147|DONSON|chr21|-|SE|33587521|33587602|33585977|33586181|33588320|33588646_DN
ENSG00000140525|FANCI|chr15|+|SE|89306006|89306194|89305604|89305698|89307475|89307529	-0.095	ENSG00000140525|FANCI|chr15|+|SE|89306006|89306194|89305604|89305698|89307475|89307529_DN
ENSG00000165219|GAPVD1|chr9|+|SE|125268935|125268984|125261809|125261959|125298889|125299106	-0.095	ENSG00000165219|GAPVD1|chr9|+|SE|125268935|125268984|125261809|125261959|125298889|125299106_DN
ENSG00000170322|NFRKB|chr11|-|SE|129893296|129893385|129892714|129892870|129894358|129894438	-0.095	ENSG00000170322|NFRKB|chr11|-|SE|129893296|129893385|129892714|129892870|129894358|129894438_DN
ENSG00000075142|SRI|chr7|-|SE|88214794|88214936|88210881|88210925|88217121|88217191	-0.095	ENSG00000075142|SRI|chr7|-|SE|88214794|88214936|88210881|88210925|88217121|88217191_DN
ENSG00000153048|CARHSP1|chr16|-|SE|8860104|8860218|8858912|8859335|8868965|8869006	-0.094	ENSG00000153048|CARHSP1|chr16|-|SE|8860104|8860218|8858912|8859335|8868965|8869006_DN
ENSG00000223773|CD99P1|chrX|+|SE|2622689|2622734|2619428|2619497|2623384|2623453	-0.094	ENSG00000223773|CD99P1|chrX|+|SE|2622689|2622734|2619428|2619497|2623384|2623453_DN
ENSG00000123219|CENPK|chr5|-|A5SS|65561462|65561564|65561496|65561564|65554796|65554946	-0.094	ENSG00000123219|CENPK|chr5|-|A5SS|65561462|65561564|65561496|65561564|65554796|65554946_DN
ENSG00000084110|HAL|chr12|-|SE|95976428|95976498|95972661|95974372|95976597|95976706	-0.094	ENSG00000084110|HAL|chr12|-|SE|95976428|95976498|95972661|95974372|95976597|95976706_DN
ENSG00000256269|HMBS|chr11|+|A5SS|119088634|119088848|119088634|119088707|119089216|119089272	-0.094	ENSG00000256269|HMBS|chr11|+|A5SS|119088634|119088848|119088634|119088707|119089216|119089272_DN
ENSG00000196535|MYO18A|chr17|-|SE|29137015|29137084|29122165|29122253|29140339|29140379	-0.094	ENSG00000196535|MYO18A|chr17|-|SE|29137015|29137084|29122165|29122253|29140339|29140379_DN
ENSG00000100461|RBM23|chr14|-|A3SS|22905093|22905246|22905093|22905221|22905335|22905453	-0.094	ENSG00000100461|RBM23|chr14|-|A3SS|22905093|22905246|22905093|22905221|22905335|22905453_DN
ENSG00000163785|RYK|chr3|-|SE|134177940|134178073|134175929|134176039|134183001|134183033	-0.094	ENSG00000163785|RYK|chr3|-|SE|134177940|134178073|134175929|134176039|134183001|134183033_DN
ENSG00000094975|SUCO|chr1|+|SE|172553259|172553370|172551511|172551626|172555868|172556023	-0.094	ENSG00000094975|SUCO|chr1|+|SE|172553259|172553370|172551511|172551626|172555868|172556023_DN
ENSG00000166012|TAF1D|chr11|-|A3SS|93738108|93738499|93738108|93738440|93739236|93739331	-0.094	ENSG00000166012|TAF1D|chr11|-|A3SS|93738108|93738499|93738108|93738440|93739236|93739331_DN
ENSG00000126768|TIMM17B|chrX|-|A3SS|48895351|48895972|48895351|48895454|48896758|48896858	-0.094	ENSG00000126768|TIMM17B|chrX|-|A3SS|48895351|48895972|48895351|48895454|48896758|48896858_DN
ENSG00000113845|TIMMDC1|chr3|+|SE|119500694|119500860|119498531|119498927|119503531|119503620	-0.094	ENSG00000113845|TIMMDC1|chr3|+|SE|119500694|119500860|119498531|119498927|119503531|119503620_DN
ENSG00000033178|UBA6|chr4|-|SE|67624125|67624253|67623134|67623222|67624993|67625187	-0.094	ENSG00000033178|UBA6|chr4|-|SE|67624125|67624253|67623134|67623222|67624993|67625187_DN
ENSG00000028116|VRK2|chr2|+|SE|58084880|58084950|58084088|58084138|58086338|58086426	-0.094	ENSG00000028116|VRK2|chr2|+|SE|58084880|58084950|58084088|58084138|58086338|58086426_DN
ENSG00000102543|CDADC1|chr13|+|A3SS|49259345|49259523|49259485|49259523|49255838|49255913	-0.093	ENSG00000102543|CDADC1|chr13|+|A3SS|49259345|49259523|49259485|49259523|49255838|49255913_DN
ENSG00000107521|HPS1|chr10|-|A5SS|98433939|98434091|98433982|98434091|98430570|98430670	-0.093	ENSG00000107521|HPS1|chr10|-|A5SS|98433939|98434091|98433982|98434091|98430570|98430670_DN
ENSG00000147050|KDM6A|chrX|+|SE|45106541|45106649|45090816|45090864|45107409|45107536	-0.093	ENSG00000147050|KDM6A|chrX|+|SE|45106541|45106649|45090816|45090864|45107409|45107536_DN
ENSG00000107643|MAPK8|chr10|+|MXE|48424087|48424159|48424513|48424585|48420154|48420320|48425887|48426070	-0.093	ENSG00000107643|MAPK8|chr10|+|MXE|48424087|48424159|48424513|48424585|48420154|48420320|48425887|48426070_DN
ENSG00000198755|RPL10A|chr6|+|RI|35468419|35468873|35468419|35468439|35468798|35468873	-0.093	ENSG00000198755|RPL10A|chr6|+|RI|35468419|35468873|35468419|35468439|35468798|35468873_DN
ENSG00000112759|SLC29A1|chr6|+|A3SS|44227259|44227342|44227262|44227342|44219504|44219782	-0.093	ENSG00000112759|SLC29A1|chr6|+|A3SS|44227259|44227342|44227262|44227342|44219504|44219782_DN
ENSG00000163877|SNIP1|chr1|-|SE|37548820|37548987|37540156|37540755|37552644|37552747	-0.093	ENSG00000163877|SNIP1|chr1|-|SE|37548820|37548987|37540156|37540755|37552644|37552747_DN
ENSG00000196323|ZBTB44|chr11|-|A3SS|130238443|130238607|130238443|130238556|130239811|130239896	-0.093	ENSG00000196323|ZBTB44|chr11|-|A3SS|130238443|130238607|130238443|130238556|130239811|130239896_DN
ENSG00000141552|ANAPC11|chr17|+|SE|81893551|81893614|81891712|81891841|81894466|81894586	-0.092	ENSG00000141552|ANAPC11|chr17|+|SE|81893551|81893614|81891712|81891841|81894466|81894586_DN
ENSG00000089127|OAS1|chr12|+|A3SS|112911050|112911235|112911097|112911235|112908535|112908824	-0.092	ENSG00000089127|OAS1|chr12|+|A3SS|112911050|112911235|112911097|112911235|112908535|112908824_DN
ENSG00000105223|PLD3|chr19|+|SE|40365717|40365930|40348684|40348768|40366418|40366464	-0.092	ENSG00000105223|PLD3|chr19|+|SE|40365717|40365930|40348684|40348768|40366418|40366464_DN
ENSG00000175354|PTPN2|chr18|-|A3SS|12817155|12817365|12817155|12817265|12825809|12825944	-0.092	ENSG00000175354|PTPN2|chr18|-|A3SS|12817155|12817365|12817155|12817265|12825809|12825944_DN
ENSG00000115657|ABCB6|chr2|-|SE|219216651|219216832|219216363|219216465|219217669|219217807	-0.091	ENSG00000115657|ABCB6|chr2|-|SE|219216651|219216832|219216363|219216465|219217669|219217807_DN
ENSG00000134759|ELP2|chr18|+|SE|36138794|36138872|36138094|36138426|36141136|36141191	-0.091	ENSG00000134759|ELP2|chr18|+|SE|36138794|36138872|36138094|36138426|36141136|36141191_DN
ENSG00000146067|FAM193B|chr5|-|SE|177532155|177532200|177531337|177531521|177532442|177532612	-0.091	ENSG00000146067|FAM193B|chr5|-|SE|177532155|177532200|177531337|177531521|177532442|177532612_DN
ENSG00000150782|IL18|chr11|-|SE|112153591|112153603|112150071|112150206|112154974|112155061	-0.091	ENSG00000150782|IL18|chr11|-|SE|112153591|112153603|112150071|112150206|112154974|112155061_DN
ENSG00000198625|MDM4|chr1|+|MXE|204526359|204526434|204537458|204537497|204525483|204525596|204538208|204538308	-0.091	ENSG00000198625|MDM4|chr1|+|MXE|204526359|204526434|204537458|204537497|204525483|204525596|204538208|204538308_DN
ENSG00000099331|MYO9B|chr19|+|RI|17211650|17213284|17211650|17211774|17211894|17213284	-0.091	ENSG00000099331|MYO9B|chr19|+|RI|17211650|17213284|17211650|17211774|17211894|17213284_DN
ENSG00000119383|PTPA|chr9|+|SE|129127963|129128068|129123051|129123138|129128984|129129110	-0.091	ENSG00000119383|PTPA|chr9|+|SE|129127963|129128068|129123051|129123138|129128984|129129110_DN
ENSG00000023287|RB1CC1|chr8|-|SE|52685398|52685520|52683886|52684013|52686852|52686967	-0.091	ENSG00000023287|RB1CC1|chr8|-|SE|52685398|52685520|52683886|52684013|52686852|52686967_DN
ENSG00000075303|SLC25A40|chr7|-|SE|87860071|87860169|87858630|87858751|87860571|87860640	-0.091	ENSG00000075303|SLC25A40|chr7|-|SE|87860071|87860169|87858630|87858751|87860571|87860640_DN
ENSG00000244687|UBE2V1|chr20|-|RI|50096482|50096820|50096482|50096534|50096671|50096820	-0.091	ENSG00000244687|UBE2V1|chr20|-|RI|50096482|50096820|50096482|50096534|50096671|50096820_DN
ENSG00000033030|ZCCHC8|chr12|-|SE|122483278|122483344|122482634|122482695|122489385|122489463	-0.091	ENSG00000033030|ZCCHC8|chr12|-|SE|122483278|122483344|122482634|122482695|122489385|122489463_DN
ENSG00000177479|ARIH2|chr3|+|MXE|48927461|48927813|48945135|48945181|48918820|48918998|48961611|48961679	-0.09	ENSG00000177479|ARIH2|chr3|+|MXE|48927461|48927813|48945135|48945181|48918820|48918998|48961611|48961679_DN
ENSG00000175334|BANF1|chr11|+|SE|66003234|66003373|66002227|66002513|66003625|66003898	-0.09	ENSG00000175334|BANF1|chr11|+|SE|66003234|66003373|66002227|66002513|66003625|66003898_DN
ENSG00000083799|CYLD|chr16|+|A3SS|50749548|50750202|50749575|50750202|50742761|50742841	-0.09	ENSG00000083799|CYLD|chr16|+|A3SS|50749548|50750202|50749575|50750202|50742761|50742841_DN
ENSG00000114346|ECT2|chr3|+|SE|172752149|172752436|172750762|172750857|172754508|172754660	-0.09	ENSG00000114346|ECT2|chr3|+|SE|172752149|172752436|172750762|172750857|172754508|172754660_DN
ENSG00000148308|GTF3C5|chr9|+|SE|133054943|133054964|133054711|133054809|133056011|133056094	-0.09	ENSG00000148308|GTF3C5|chr9|+|SE|133054943|133054964|133054711|133054809|133056011|133056094_DN
ENSG00000099875|MKNK2|chr19|-|SE|2039630|2039856|2037464|2037829|2040133|2040177	-0.09	ENSG00000099875|MKNK2|chr19|-|SE|2039630|2039856|2037464|2037829|2040133|2040177_DN
ENSG00000145725|PPIP5K2|chr5|+|SE|103183233|103183407|103180020|103180188|103184671|103184744	-0.09	ENSG00000145725|PPIP5K2|chr5|+|SE|103183233|103183407|103180020|103180188|103184671|103184744_DN
ENSG00000172053|QARS|chr3|-|A3SS|49103344|49103466|49103344|49103431|49103630|49103706	-0.09	ENSG00000172053|QARS|chr3|-|A3SS|49103344|49103466|49103344|49103431|49103630|49103706_DN
ENSG00000163584|RPL22L1|chr3|-|A3SS|170868012|170868201|170868012|170868134|170868297|170868387	-0.09	ENSG00000163584|RPL22L1|chr3|-|A3SS|170868012|170868201|170868012|170868134|170868297|170868387_DN
ENSG00000134802|SLC43A3|chr11|-|A3SS|57425988|57426389|57425988|57426352|57426587|57426652	-0.09	ENSG00000134802|SLC43A3|chr11|-|A3SS|57425988|57426389|57425988|57426352|57426587|57426652_DN
ENSG00000168785|TSPAN5|chr4|-|A3SS|98478684|98478810|98478684|98478746|98482004|98482175	-0.09	ENSG00000168785|TSPAN5|chr4|-|A3SS|98478684|98478810|98478684|98478746|98482004|98482175_DN
ENSG00000215908|CROCCP2|chr1|-|SE|16619844|16620024|16618252|16619103|16625774|16626005	-0.089	ENSG00000215908|CROCCP2|chr1|-|SE|16619844|16620024|16618252|16619103|16625774|16626005_DN
ENSG00000180353|HCLS1|chr3|-|MXE|121637145|121637256|121642926|121642981|121636433|121636489|121644817|121644928	-0.089	ENSG00000180353|HCLS1|chr3|-|MXE|121637145|121637256|121642926|121642981|121636433|121636489|121644817|121644928_DN
ENSG00000239998|LILRA2|chr19|+|SE|54573830|54573912|54573350|54573435|54574075|54574111	-0.089	ENSG00000239998|LILRA2|chr19|+|SE|54573830|54573912|54573350|54573435|54574075|54574111_DN
ENSG00000185187|SIGIRR|chr11|-|SE|408694|408893|408072|408206|414822|414999	-0.089	ENSG00000185187|SIGIRR|chr11|-|SE|408694|408893|408072|408206|414822|414999_DN
ENSG00000042088|TDP1|chr14|+|SE|89975780|89975815|89971174|89971271|89980539|89980587	-0.089	ENSG00000042088|TDP1|chr14|+|SE|89975780|89975815|89971174|89971271|89980539|89980587_DN
ENSG00000007255|TRAPPC6A|chr19|-|SE|45165126|45165194|45164724|45164970|45178134|45178237	-0.089	ENSG00000007255|TRAPPC6A|chr19|-|SE|45165126|45165194|45164724|45164970|45178134|45178237_DN
ENSG00000168488|ATXN2L|chr16|+|A3SS|28836727|28837237|28836750|28837237|28835932|28836122	-0.088	ENSG00000168488|ATXN2L|chr16|+|A3SS|28836727|28837237|28836750|28837237|28835932|28836122_DN
ENSG00000066322|ELOVL1|chr1|-|A3SS|43364927|43365376|43364927|43365008|43365563|43365623	-0.088	ENSG00000066322|ELOVL1|chr1|-|A3SS|43364927|43365376|43364927|43365008|43365563|43365623_DN
ENSG00000118308|LRMP|chr12|+|SE|25104360|25104462|25104008|25104058|25106942|25107050	-0.088	ENSG00000118308|LRMP|chr12|+|SE|25104360|25104462|25104008|25104058|25106942|25107050_DN
ENSG00000084072|PPIE|chr1|+|SE|39745374|39745498|39743823|39743924|39748902|39749088	-0.088	ENSG00000084072|PPIE|chr1|+|SE|39745374|39745498|39743823|39743924|39748902|39749088_DN
ENSG00000084072|PPIE|chr1|+|SE|39745413|39745498|39743823|39743924|39748902|39749088	-0.088	ENSG00000084072|PPIE|chr1|+|SE|39745413|39745498|39743823|39743924|39748902|39749088_DN
ENSG00000080345|RIF1|chr2|+|SE|151468473|151468551|151467999|151468146|151468640|151468756	-0.088	ENSG00000080345|RIF1|chr2|+|SE|151468473|151468551|151467999|151468146|151468640|151468756_DN
ENSG00000169689|CENPX|chr17|-|SE|82019640|82019694|82018837|82019381|82019857|82019909	-0.087	ENSG00000169689|CENPX|chr17|-|SE|82019640|82019694|82018837|82019381|82019857|82019909_DN
ENSG00000137807|KIF23|chr15|+|MXE|69440767|69441079|69444789|69445041|69440307|69440487|69446008|69446091	-0.087	ENSG00000137807|KIF23|chr15|+|MXE|69440767|69441079|69444789|69445041|69440307|69440487|69446008|69446091_DN
ENSG00000088970|KIZ|chr20|+|A5SS|21205490|21205584|21205490|21205530|21214534|21214700	-0.087	ENSG00000088970|KIZ|chr20|+|A5SS|21205490|21205584|21205490|21205530|21214534|21214700_DN
ENSG00000092931|MFSD11|chr17|+|A5SS|76754046|76754204|76754046|76754087|76767385|76767451	-0.087	ENSG00000092931|MFSD11|chr17|+|A5SS|76754046|76754204|76754046|76754087|76767385|76767451_DN
ENSG00000187109|NAP1L1|chr12|-|SE|76074202|76074239|76067370|76067473|76084566|76084612	-0.087	ENSG00000187109|NAP1L1|chr12|-|SE|76074202|76074239|76067370|76067473|76084566|76084612_DN
ENSG00000140853|NLRC5|chr16|+|SE|57046551|57046641|57045296|57045492|57047544|57047628	-0.087	ENSG00000140853|NLRC5|chr16|+|SE|57046551|57046641|57045296|57045492|57047544|57047628_DN
ENSG00000172113|NME6|chr3|-|A3SS|48296118|48296236|48296118|48296158|48296726|48296829	-0.087	ENSG00000172113|NME6|chr3|-|A3SS|48296118|48296236|48296118|48296158|48296726|48296829_DN
ENSG00000158828|PINK1|chr1|+|RI|20648504|20649231|20648504|20648632|20648994|20649231	-0.087	ENSG00000158828|PINK1|chr1|+|RI|20648504|20649231|20648504|20648632|20648994|20649231_DN
ENSG00000175334|BANF1|chr11|+|SE|66003234|66003373|66002078|66002570|66003625|66003898	-0.086	ENSG00000175334|BANF1|chr11|+|SE|66003234|66003373|66002078|66002570|66003625|66003898_DN
ENSG00000163170|BOLA3|chr2|-|SE|74142271|74142360|74135397|74135658|74145188|74145303	-0.086	ENSG00000163170|BOLA3|chr2|-|SE|74142271|74142360|74135397|74135658|74145188|74145303_DN
ENSG00000147408|CSGALNACT1|chr8|-|SE|19585165|19585317|19505200|19506130|19601770|19601865	-0.086	ENSG00000147408|CSGALNACT1|chr8|-|SE|19585165|19585317|19505200|19506130|19601770|19601865_DN
ENSG00000134574|DDB2|chr11|+|SE|47234756|47234934|47234572|47234672|47235269|47235412	-0.086	ENSG00000134574|DDB2|chr11|+|SE|47234756|47234934|47234572|47234672|47235269|47235412_DN
ENSG00000084072|PPIE|chr1|+|SE|39745374|39748767|39743823|39743924|39748902|39749088	-0.086	ENSG00000084072|PPIE|chr1|+|SE|39745374|39748767|39743823|39743924|39748902|39749088_DN
ENSG00000132300|PTCD3|chr2|+|SE|86119543|86119614|86118920|86119044|86121478|86121591	-0.086	ENSG00000132300|PTCD3|chr2|+|SE|86119543|86119614|86118920|86119044|86121478|86121591_DN
ENSG00000168118|RAB4A|chr1|+|A3SS|229297481|229297636|229297519|229297636|229295847|229295910	-0.086	ENSG00000168118|RAB4A|chr1|+|A3SS|229297481|229297636|229297519|229297636|229295847|229295910_DN
ENSG00000164466|SFXN1|chr5|+|A3SS|175509031|175509202|175509060|175509202|175492094|175492267	-0.086	ENSG00000164466|SFXN1|chr5|+|A3SS|175509031|175509202|175509060|175509202|175492094|175492267_DN
ENSG00000198837|DENND4B|chr1|-|RI|153930538|153931064|153930538|153930603|153930691|153931064	-0.085	ENSG00000198837|DENND4B|chr1|-|RI|153930538|153931064|153930538|153930603|153930691|153931064_DN
ENSG00000066322|ELOVL1|chr1|-|MXE|43364927|43365008|43365185|43365376|43364737|43364794|43365563|43365623	-0.085	ENSG00000066322|ELOVL1|chr1|-|MXE|43364927|43365008|43365185|43365376|43364737|43364794|43365563|43365623_DN
ENSG00000159592|GPBP1L1|chr1|-|SE|45685575|45685620|45660183|45661225|45687982|45688113	-0.085	ENSG00000159592|GPBP1L1|chr1|-|SE|45685575|45685620|45660183|45661225|45687982|45688113_DN
ENSG00000205581|HMGN1|chr21|-|MXE|39347246|39347292|39347378|39347478|39345145|39345274|39348291|39348339	-0.085	ENSG00000205581|HMGN1|chr21|-|MXE|39347246|39347292|39347378|39347478|39345145|39345274|39348291|39348339_DN
ENSG00000007392|LUC7L|chr16|-|SE|208600|208664|208077|208188|220648|220747	-0.085	ENSG00000007392|LUC7L|chr16|-|SE|208600|208664|208077|208188|220648|220747_DN
ENSG00000172590|MRPL52|chr14|+|SE|22833417|22833489|22830186|22830254|22834171|22834346	-0.085	ENSG00000172590|MRPL52|chr14|+|SE|22833417|22833489|22830186|22830254|22834171|22834346_DN
ENSG00000117616|RSRP1|chr1|-|RI|25243549|25245301|25243549|25244224|25245149|25245301	-0.085	ENSG00000117616|RSRP1|chr1|-|RI|25243549|25245301|25243549|25244224|25245149|25245301_DN
ENSG00000145979|TBC1D7|chr6|-|SE|13325093|13325174|13320831|13321095|13326786|13326906	-0.085	ENSG00000145979|TBC1D7|chr6|-|SE|13325093|13325174|13320831|13321095|13326786|13326906_DN
ENSG00000163931|TKT|chr3|-|A3SS|53237796|53237921|53237796|53237820|53240250|53240348	-0.085	ENSG00000163931|TKT|chr3|-|A3SS|53237796|53237921|53237796|53237820|53240250|53240348_DN
ENSG00000196704|AMZ2|chr17|+|A5SS|68250187|68250967|68250187|68250470|68251049|68251178	-0.084	ENSG00000196704|AMZ2|chr17|+|A5SS|68250187|68250967|68250187|68250470|68251049|68251178_DN
ENSG00000258289|CHURC1|chr14|+|SE|64926009|64926080|64923990|64924126|64943298|64944056	-0.084	ENSG00000258289|CHURC1|chr14|+|SE|64926009|64926080|64923990|64924126|64943298|64944056_DN
ENSG00000133393|FOPNL|chr16|-|SE|15873490|15873627|15865719|15867516|15879803|15879888	-0.084	ENSG00000133393|FOPNL|chr16|-|SE|15873490|15873627|15865719|15867516|15879803|15879888_DN
ENSG00000137965|IFI44|chr1|+|SE|78650540|78650652|78649831|78649905|78654242|78654279	-0.084	ENSG00000137965|IFI44|chr1|+|SE|78650540|78650652|78649831|78649905|78654242|78654279_DN
ENSG00000138434|ITPRID2|chr2|+|SE|181928160|181928199|181921947|181922412|181929560|181929677	-0.084	ENSG00000138434|ITPRID2|chr2|+|SE|181928160|181928199|181921947|181922412|181929560|181929677_DN
ENSG00000080503|SMARCA2|chr9|+|SE|2170418|2170472|2161685|2161903|2181570|2181676	-0.084	ENSG00000080503|SMARCA2|chr9|+|SE|2170418|2170472|2161685|2161903|2181570|2181676_DN
ENSG00000110719|TCIRG1|chr11|+|RI|68047646|68047972|68047646|68047804|68047881|68047972	-0.084	ENSG00000110719|TCIRG1|chr11|+|RI|68047646|68047972|68047646|68047804|68047881|68047972_DN
ENSG00000136878|USP20|chr9|+|RI|129880112|129881828|129880112|129880289|129880466|129881828	-0.084	ENSG00000136878|USP20|chr9|+|RI|129880112|129881828|129880112|129880289|129880466|129881828_DN
ENSG00000093134|VNN3|chr6|-|RI|132734252|132734692|132734252|132734383|132734479|132734692	-0.084	ENSG00000093134|VNN3|chr6|-|RI|132734252|132734692|132734252|132734383|132734479|132734692_DN
ENSG00000160948|VPS28|chr8|-|A3SS|144424945|144425051|144424945|144425000|144425682|144425772	-0.084	ENSG00000160948|VPS28|chr8|-|A3SS|144424945|144425051|144424945|144425000|144425682|144425772_DN
ENSG00000182511|FES|chr15|+|SE|90890981|90891191|90890400|90890484|90891553|90891676	-0.083	ENSG00000182511|FES|chr15|+|SE|90890981|90891191|90890400|90890484|90891553|90891676_DN
ENSG00000126456|IRF3|chr19|-|A3SS|49660712|49660844|49660712|49660828|49661947|49662328	-0.083	ENSG00000126456|IRF3|chr19|-|A3SS|49660712|49660844|49660712|49660828|49661947|49662328_DN
ENSG00000126456|IRF3|chr19|-|MXE|49664442|49664673|49664673|49664846|49663342|49663514|49665630|49665705	-0.083	ENSG00000126456|IRF3|chr19|-|MXE|49664442|49664673|49664673|49664846|49663342|49663514|49665630|49665705_DN
ENSG00000102897|LYRM1|chr16|+|SE|20902485|20902717|20900449|20900535|20915555|20915714	-0.083	ENSG00000102897|LYRM1|chr16|+|SE|20902485|20902717|20900449|20900535|20915555|20915714_DN
ENSG00000166912|MTMR10|chr15|-|SE|30967919|30968010|30960880|30961073|30974313|30974456	-0.083	ENSG00000166912|MTMR10|chr15|-|SE|30967919|30968010|30960880|30961073|30974313|30974456_DN
ENSG00000164087|POC1A|chr3|-|SE|52096568|52096712|52075252|52075985|52122378|52122477	-0.083	ENSG00000164087|POC1A|chr3|-|SE|52096568|52096712|52075252|52075985|52122378|52122477_DN
ENSG00000140983|RHOT2|chr16|+|A3SS|671082|671203|671114|671203|670891|671000	-0.083	ENSG00000140983|RHOT2|chr16|+|A3SS|671082|671203|671114|671203|670891|671000_DN
ENSG00000023191|RNH1|chr11|-|SE|504823|504996|502061|502249|506608|506800	-0.083	ENSG00000023191|RNH1|chr11|-|SE|504823|504996|502061|502249|506608|506800_DN
ENSG00000005379|TSPOAP1|chr17|-|A3SS|58306341|58306413|58306341|58306386|58306799|58306968	-0.083	ENSG00000005379|TSPOAP1|chr17|-|A3SS|58306341|58306413|58306341|58306386|58306799|58306968_DN
ENSG00000152457|DCLRE1C|chr10|-|SE|14936537|14936593|14935462|14935564|14939809|14939869	-0.082	ENSG00000152457|DCLRE1C|chr10|-|SE|14936537|14936593|14935462|14935564|14939809|14939869_DN
ENSG00000169045|HNRNPH1|chr5|-|SE|179618144|179618323|179617798|179617911|179620891|179621035	-0.082	ENSG00000169045|HNRNPH1|chr5|-|SE|179618144|179618323|179617798|179617911|179620891|179621035_DN
ENSG00000078403|MLLT10|chr10|+|SE|21571974|21572026|21538832|21538912|21586293|21586348	-0.082	ENSG00000078403|MLLT10|chr10|+|SE|21571974|21572026|21538832|21538912|21586293|21586348_DN
ENSG00000117115|PADI2|chr1|-|RI|17074855|17075823|17074855|17074949|17075678|17075823	-0.082	ENSG00000117115|PADI2|chr1|-|RI|17074855|17075823|17074855|17074949|17075678|17075823_DN
ENSG00000078140|UBE2K|chr4|+|SE|39777681|39777810|39774833|39774933|39778359|39778384	-0.082	ENSG00000078140|UBE2K|chr4|+|SE|39777681|39777810|39774833|39774933|39778359|39778384_DN
ENSG00000111237|VPS29|chr12|-|A5SS|110499456|110499546|110499534|110499546|110496011|110496203	-0.082	ENSG00000111237|VPS29|chr12|-|A5SS|110499456|110499546|110499534|110499546|110496011|110496203_DN
ENSG00000164162|ANAPC10|chr4|-|SE|145064571|145064692|144994574|144995603|145081659|145081750	-0.081	ENSG00000164162|ANAPC10|chr4|-|SE|145064571|145064692|144994574|144995603|145081659|145081750_DN
ENSG00000187741|FANCA|chr16|-|SE|89758576|89758705|89752137|89752222|89761948|89762022	-0.081	ENSG00000187741|FANCA|chr16|-|SE|89758576|89758705|89752137|89752222|89761948|89762022_DN
ENSG00000115919|KYNU|chr2|+|SE|142881344|142881430|142877663|142877736|142885348|142885536	-0.081	ENSG00000115919|KYNU|chr2|+|SE|142881344|142881430|142877663|142877736|142885348|142885536_DN
ENSG00000137497|NUMA1|chr11|-|SE|72068078|72068231|72035901|72035975|72069841|72069911	-0.081	ENSG00000137497|NUMA1|chr11|-|SE|72068078|72068231|72035901|72035975|72069841|72069911_DN
ENSG00000181396|OGFOD3|chr17|-|SE|82394330|82394543|82392009|82392534|82398195|82398319	-0.081	ENSG00000181396|OGFOD3|chr17|-|SE|82394330|82394543|82392009|82392534|82398195|82398319_DN
ENSG00000140521|POLG|chr15|-|SE|89317938|89318037|89317375|89317536|89318540|89318749	-0.081	ENSG00000140521|POLG|chr15|-|SE|89317938|89318037|89317375|89317536|89318540|89318749_DN
ENSG00000157954|WIPI2|chr7|+|SE|5193117|5193345|5190258|5190493|5199575|5199658	-0.081	ENSG00000157954|WIPI2|chr7|+|SE|5193117|5193345|5190258|5190493|5199575|5199658_DN
ENSG00000154767|XPC|chr3|-|SE|14168256|14168380|14167168|14167253|14170437|14170460	-0.081	ENSG00000154767|XPC|chr3|-|SE|14168256|14168380|14167168|14167253|14170437|14170460_DN
ENSG00000174837|ADGRE1|chr19|+|A5SS|6928144|6928310|6928144|6928211|6934986|6935078	-0.08	ENSG00000174837|ADGRE1|chr19|+|A5SS|6928144|6928310|6928144|6928211|6934986|6935078_DN
ENSG00000148019|CEP78|chr9|+|A5SS|78236079|78236659|78236079|78236603|78240022|78240195	-0.08	ENSG00000148019|CEP78|chr9|+|A5SS|78236079|78236659|78236079|78236603|78240022|78240195_DN
ENSG00000143476|DTL|chr1|+|SE|212042992|212043118|212035576|212035942|212044659|212044758	-0.08	ENSG00000143476|DTL|chr1|+|SE|212042992|212043118|212035576|212035942|212044659|212044758_DN
ENSG00000103942|HOMER2|chr15|-|A3SS|82859028|82859168|82859028|82859135|82864166|82864259	-0.08	ENSG00000103942|HOMER2|chr15|-|A3SS|82859028|82859168|82859028|82859135|82864166|82864259_DN
ENSG00000204178|MACO1|chr1|+|SE|25456652|25456831|25454258|25454382|25458390|25458892	-0.08	ENSG00000204178|MACO1|chr1|+|SE|25456652|25456831|25454258|25454382|25458390|25458892_DN
ENSG00000175581|MRPL48|chr11|+|SE|73805026|73805079|73787315|73787992|73825707|73825796	-0.08	ENSG00000175581|MRPL48|chr11|+|SE|73805026|73805079|73787315|73787992|73825707|73825796_DN
ENSG00000008294|SPAG9|chr17|-|A3SS|50989676|50989872|50989676|50989827|50990449|50990668	-0.08	ENSG00000008294|SPAG9|chr17|-|A3SS|50989676|50989872|50989676|50989827|50990449|50990668_DN
ENSG00000185347|TEDC1|chr14|+|A3SS|105492106|105492309|105492147|105492309|105491621|105491700	-0.08	ENSG00000185347|TEDC1|chr14|+|A3SS|105492106|105492309|105492147|105492309|105491621|105491700_DN
ENSG00000177479|ARIH2|chr3|+|MXE|48924717|48924839|48944981|48945181|48922747|48922811|48961611|48961679	-0.079	ENSG00000177479|ARIH2|chr3|+|MXE|48924717|48924839|48944981|48945181|48922747|48922811|48961611|48961679_DN
ENSG00000110619|CARS|chr11|-|A3SS|3040895|3041031|3040895|3040984|3042164|3042256	-0.079	ENSG00000110619|CARS|chr11|-|A3SS|3040895|3041031|3040895|3040984|3042164|3042256_DN
ENSG00000175470|PPP2R2D|chr10|+|A3SS|131943967|131944145|131944094|131944145|131940581|131940694	-0.079	ENSG00000175470|PPP2R2D|chr10|+|A3SS|131943967|131944145|131944094|131944145|131940581|131940694_DN
ENSG00000145979|TBC1D7|chr6|-|SE|13318097|13318193|13316570|13316708|13320907|13320981	-0.079	ENSG00000145979|TBC1D7|chr6|-|SE|13318097|13318193|13316570|13316708|13320907|13320981_DN
ENSG00000122218|COPA|chr1|-|SE|160298844|160298991|160297555|160297745|160305432|160305571	-0.078	ENSG00000122218|COPA|chr1|-|SE|160298844|160298991|160297555|160297745|160305432|160305571_DN
ENSG00000124357|NAGK|chr2|+|A3SS|71072825|71073594|71073481|71073594|71072640|71072751	-0.078	ENSG00000124357|NAGK|chr2|+|A3SS|71072825|71073594|71073481|71073594|71072640|71072751_DN
ENSG00000052723|SIKE1|chr1|-|SE|114776345|114776459|114769478|114774372|114779141|114779284	-0.078	ENSG00000052723|SIKE1|chr1|-|SE|114776345|114776459|114769478|114774372|114779141|114779284_DN
ENSG00000102710|SUPT20H|chr13|-|SE|37025319|37025437|37024339|37024442|37026203|37026236	-0.078	ENSG00000102710|SUPT20H|chr13|-|SE|37025319|37025437|37024339|37024442|37026203|37026236_DN
ENSG00000055070|SZRD1|chr1|+|SE|16391374|16391424|16367082|16367308|16393230|16393482	-0.078	ENSG00000055070|SZRD1|chr1|+|SE|16391374|16391424|16367082|16367308|16393230|16393482_DN
ENSG00000171204|TMEM126B|chr11|+|SE|85631144|85631316|85629131|85629262|85631686|85631791	-0.078	ENSG00000171204|TMEM126B|chr11|+|SE|85631144|85631316|85629131|85629262|85631686|85631791_DN
ENSG00000141759|TXNL4A|chr18|-|SE|79977597|79977701|79970810|79973856|79988239|79988536	-0.078	ENSG00000141759|TXNL4A|chr18|-|SE|79977597|79977701|79970810|79973856|79988239|79988536_DN
ENSG00000228106|AL392172.1|chr1|+|A3SS|222836922|222837384|222836995|222837384|222835118|222835215	-0.077	ENSG00000228106|AL392172.1|chr1|+|A3SS|222836922|222837384|222836995|222837384|222835118|222835215_DN
ENSG00000130429|ARPC1B|chr7|+|SE|99377337|99377455|99374674|99374781|99385701|99385778	-0.077	ENSG00000130429|ARPC1B|chr7|+|SE|99377337|99377455|99374674|99374781|99385701|99385778_DN
ENSG00000132676|DAP3|chr1|+|SE|155721516|155721618|155717005|155717128|155725381|155725411	-0.077	ENSG00000132676|DAP3|chr1|+|SE|155721516|155721618|155717005|155717128|155725381|155725411_DN
ENSG00000168116|KIAA1586|chr6|+|SE|57050773|57050854|57047312|57047396|57052685|57053046	-0.077	ENSG00000168116|KIAA1586|chr6|+|SE|57050773|57050854|57047312|57047396|57052685|57053046_DN
ENSG00000168067|MAP4K2|chr11|-|SE|64800899|64801031|64800763|64800826|64801110|64801183	-0.077	ENSG00000168067|MAP4K2|chr11|-|SE|64800899|64801031|64800763|64800826|64801110|64801183_DN
ENSG00000099875|MKNK2|chr19|-|A3SS|2037464|2039856|2037464|2037829|2040133|2040177	-0.077	ENSG00000099875|MKNK2|chr19|-|A3SS|2037464|2039856|2037464|2037829|2040133|2040177_DN
ENSG00000115204|MPV17|chr2|-|A3SS|27312993|27313109|27312993|27313074|27322447|27322522	-0.077	ENSG00000115204|MPV17|chr2|-|A3SS|27312993|27313109|27312993|27313074|27322447|27322522_DN
ENSG00000171792|RHNO1|chr12|+|SE|2885161|2885534|2877198|2877282|2887910|2888057	-0.077	ENSG00000171792|RHNO1|chr12|+|SE|2885161|2885534|2877198|2877282|2887910|2888057_DN
ENSG00000171792|RHNO1|chr12|+|SE|2885262|2885534|2877198|2877282|2887910|2888137	-0.077	ENSG00000171792|RHNO1|chr12|+|SE|2885262|2885534|2877198|2877282|2887910|2888137_DN
ENSG00000146828|SLC12A9|chr7|+|SE|100859049|100859161|100856793|100858942|100859884|100860042	-0.077	ENSG00000146828|SLC12A9|chr7|+|SE|100859049|100859161|100856793|100858942|100859884|100860042_DN
ENSG00000165025|SYK|chr9|+|SE|90867130|90867199|90865047|90865097|90874203|90874291	-0.077	ENSG00000165025|SYK|chr9|+|SE|90867130|90867199|90865047|90865097|90874203|90874291_DN
ENSG00000137210|TMEM14B|chr6|+|SE|10751132|10751234|10749621|10749698|10755141|10755232	-0.077	ENSG00000137210|TMEM14B|chr6|+|SE|10751132|10751234|10749621|10749698|10755141|10755232_DN
ENSG00000135655|USP15|chr12|+|SE|62374389|62374535|62355330|62355475|62381489|62381633	-0.077	ENSG00000135655|USP15|chr12|+|SE|62374389|62374535|62355330|62355475|62381489|62381633_DN
ENSG00000182973|CNOT10|chr3|+|SE|32764454|32764490|32762732|32762863|32764681|32764809	-0.076	ENSG00000182973|CNOT10|chr3|+|SE|32764454|32764490|32762732|32762863|32764681|32764809_DN
ENSG00000103051|COG4|chr16|-|SE|70515867|70516040|70514334|70514509|70517625|70517740	-0.076	ENSG00000103051|COG4|chr16|-|SE|70515867|70516040|70514334|70514509|70517625|70517740_DN
ENSG00000178927|CYBC1|chr17|-|SE|82447579|82447621|82446622|82446696|82450699|82450737	-0.076	ENSG00000178927|CYBC1|chr17|-|SE|82447579|82447621|82446622|82446696|82450699|82450737_DN
ENSG00000100429|HDAC10|chr22|-|SE|50248830|50248859|50248661|50248751|50249102|50249168	-0.076	ENSG00000100429|HDAC10|chr22|-|SE|50248830|50248859|50248661|50248751|50249102|50249168_DN
ENSG00000169045|HNRNPH1|chr5|-|RI|179616125|179617110|179616125|179616218|179617020|179617110	-0.076	ENSG00000169045|HNRNPH1|chr5|-|RI|179616125|179617110|179616125|179616218|179617020|179617110_DN
ENSG00000160439|RDH13|chr19|-|SE|55048045|55048257|55047104|55047488|55048328|55048541	-0.076	ENSG00000160439|RDH13|chr19|-|SE|55048045|55048257|55047104|55047488|55048328|55048541_DN
ENSG00000180773|SLC36A4|chr11|-|A5SS|93182805|93182894|93182834|93182894|93181690|93181786	-0.076	ENSG00000180773|SLC36A4|chr11|-|A5SS|93182805|93182894|93182834|93182894|93181690|93181786_DN
ENSG00000067066|SP100|chr2|+|SE|230417590|230417665|230415941|230416328|230442936|230443099	-0.076	ENSG00000067066|SP100|chr2|+|SE|230417590|230417665|230415941|230416328|230442936|230443099_DN
ENSG00000197912|SPG7|chr16|+|A3SS|89523482|89524247|89524005|89524247|89512947|89513037	-0.076	ENSG00000197912|SPG7|chr16|+|A3SS|89523482|89524247|89524005|89524247|89512947|89513037_DN
ENSG00000134480|CCNH|chr5|-|SE|87404843|87405007|87401701|87401772|87407975|87408186	-0.075	ENSG00000134480|CCNH|chr5|-|SE|87404843|87405007|87401701|87401772|87407975|87408186_DN
ENSG00000172183|ISG20|chr15|+|A3SS|88650234|88652310|88652169|88652310|88639342|88639594	-0.075	ENSG00000172183|ISG20|chr15|+|A3SS|88650234|88652310|88652169|88652310|88639342|88639594_DN
ENSG00000119487|MAPKAP1|chr9|-|SE|125672315|125672643|125669817|125669907|125706970|125707203	-0.075	ENSG00000119487|MAPKAP1|chr9|-|SE|125672315|125672643|125669817|125669907|125706970|125707203_DN
ENSG00000095787|WAC|chr10|+|SE|28595732|28596041|28590719|28590832|28608185|28608431	-0.075	ENSG00000095787|WAC|chr10|+|SE|28595732|28596041|28590719|28590832|28608185|28608431_DN
ENSG00000072210|ALDH3A2|chr17|+|RI|19648722|19649124|19648722|19648843|19648934|19649124	-0.074	ENSG00000072210|ALDH3A2|chr17|+|RI|19648722|19649124|19648722|19648843|19648934|19649124_DN
ENSG00000183765|CHEK2|chr22|-|SE|28730419|28730548|28725242|28725367|28734402|28734727	-0.074	ENSG00000183765|CHEK2|chr22|-|SE|28730419|28730548|28725242|28725367|28734402|28734727_DN
ENSG00000139436|GIT2|chr12|-|MXE|109947255|109947504|109951211|109951316|109939164|109939247|109953091|109953234	-0.074	ENSG00000139436|GIT2|chr12|-|MXE|109947255|109947504|109951211|109951316|109939164|109939247|109953091|109953234_DN
ENSG00000099783|HNRNPM|chr19|+|SE|8483157|8483211|8474166|8474244|8485602|8485648	-0.074	ENSG00000099783|HNRNPM|chr19|+|SE|8483157|8483211|8474166|8474244|8485602|8485648_DN
ENSG00000198160|MIER1|chr1|+|A5SS|66984571|66984652|66984571|66984592|66986402|66988619	-0.074	ENSG00000198160|MIER1|chr1|+|A5SS|66984571|66984652|66984571|66984592|66986402|66988619_DN
ENSG00000124275|MTRR|chr5|+|SE|7873372|7873526|7870769|7870923|7875257|7875310	-0.074	ENSG00000124275|MTRR|chr5|+|SE|7873372|7873526|7870769|7870923|7875257|7875310_DN
ENSG00000073536|NLE1|chr17|-|SE|35134942|35135059|35133338|35133498|35135248|35135451	-0.074	ENSG00000073536|NLE1|chr17|-|SE|35134942|35135059|35133338|35133498|35135248|35135451_DN
ENSG00000153234|NR4A2|chr2|-|SE|156326311|156326328|156326149|156326207|156326717|156326920	-0.074	ENSG00000153234|NR4A2|chr2|-|SE|156326311|156326328|156326149|156326207|156326717|156326920_DN
ENSG00000137817|PARP6|chr15|-|SE|72250844|72250954|72250019|72250092|72251206|72251255	-0.074	ENSG00000137817|PARP6|chr15|-|SE|72250844|72250954|72250019|72250092|72251206|72251255_DN
ENSG00000121067|SPOP|chr17|-|SE|49675894|49676016|49622732|49622876|49677932|49678046	-0.074	ENSG00000121067|SPOP|chr17|-|SE|49675894|49676016|49622732|49622876|49677932|49678046_DN
ENSG00000168374|ARF4|chr3|-|SE|57584383|57584464|57577315|57577387|57597073|57597198	-0.073	ENSG00000168374|ARF4|chr3|-|SE|57584383|57584464|57577315|57577387|57597073|57597198_DN
ENSG00000099624|ATP5F1D|chr19|+|RI|1244314|1244825|1244314|1244440|1244736|1244825	-0.073	ENSG00000099624|ATP5F1D|chr19|+|RI|1244314|1244825|1244314|1244440|1244736|1244825_DN
ENSG00000140995|DEF8|chr16|+|A3SS|89957472|89957660|89957510|89957660|89955168|89955266	-0.073	ENSG00000140995|DEF8|chr16|+|A3SS|89957472|89957660|89957510|89957660|89955168|89955266_DN
ENSG00000102081|FMR1|chrX|+|SE|147943130|147943326|147940575|147940662|147944943|147945051	-0.073	ENSG00000102081|FMR1|chrX|+|SE|147943130|147943326|147940575|147940662|147944943|147945051_DN
ENSG00000061273|HDAC7|chr12|-|A3SS|47797383|47797499|47797383|47797427|47798107|47798219	-0.073	ENSG00000061273|HDAC7|chr12|-|A3SS|47797383|47797499|47797383|47797427|47798107|47798219_DN
ENSG00000105486|LIG1|chr19|-|SE|48162261|48162351|48161173|48161507|48165549|48165623	-0.073	ENSG00000105486|LIG1|chr19|-|SE|48162261|48162351|48161173|48161507|48165549|48165623_DN
ENSG00000100060|MFNG|chr22|-|SE|37480720|37480769|37480196|37480299|37485922|37486393	-0.073	ENSG00000100060|MFNG|chr22|-|SE|37480720|37480769|37480196|37480299|37485922|37486393_DN
ENSG00000265681|RPL17|chr18|-|SE|49491745|49491833|49491531|49491584|49492457|49492482	-0.073	ENSG00000265681|RPL17|chr18|-|SE|49491745|49491833|49491531|49491584|49492457|49492482_DN
ENSG00000137221|TJAP1|chr6|+|SE|43478658|43478718|43478086|43478232|43497880|43497977	-0.073	ENSG00000137221|TJAP1|chr6|+|SE|43478658|43478718|43478086|43478232|43497880|43497977_DN
ENSG00000172243|CLEC7A|chr12|-|SE|10127039|10127089|10126570|10126708|10127746|10127845	-0.072	ENSG00000172243|CLEC7A|chr12|-|SE|10127039|10127089|10126570|10126708|10127746|10127845_DN
ENSG00000132676|DAP3|chr1|+|SE|155729041|155729122|155727500|155727738|155729207|155729261	-0.072	ENSG00000132676|DAP3|chr1|+|SE|155729041|155729122|155727500|155727738|155729207|155729261_DN
ENSG00000132199|ENOSF1|chr18|-|SE|678695|678737|677742|677872|683245|683380	-0.072	ENSG00000132199|ENOSF1|chr18|-|SE|678695|678737|677742|677872|683245|683380_DN
ENSG00000128915|ICE2|chr15|-|SE|60478567|60478660|60477936|60478069|60479002|60479103	-0.072	ENSG00000128915|ICE2|chr15|-|SE|60478567|60478660|60477936|60478069|60479002|60479103_DN
ENSG00000063241|ISOC2|chr19|-|SE|55455635|55455845|55455259|55455330|55456348|55456489	-0.072	ENSG00000063241|ISOC2|chr19|-|SE|55455635|55455845|55455259|55455330|55456348|55456489_DN
ENSG00000266714|MYO15B|chr17|+|RI|75590906|75591246|75590906|75591016|75591171|75591246	-0.072	ENSG00000266714|MYO15B|chr17|+|RI|75590906|75591246|75590906|75591016|75591171|75591246_DN
ENSG00000196531|NACA|chr12|-|A3SS|56714601|56714703|56714601|56714675|56724451|56724523	-0.072	ENSG00000196531|NACA|chr12|-|A3SS|56714601|56714703|56714601|56714675|56724451|56724523_DN
ENSG00000132424|PNISR|chr6|-|SE|99416348|99416428|99414571|99414690|99425214|99425270	-0.072	ENSG00000132424|PNISR|chr6|-|SE|99416348|99416428|99414571|99414690|99425214|99425270_DN
ENSG00000011304|PTBP1|chr19|+|SE|805512|805569|805012|805187|806407|806556	-0.072	ENSG00000011304|PTBP1|chr19|+|SE|805512|805569|805012|805187|806407|806556_DN
ENSG00000109113|RAB34|chr17|-|A3SS|28717212|28717425|28717212|28717291|28718121|28718268	-0.072	ENSG00000109113|RAB34|chr17|-|A3SS|28717212|28717425|28717212|28717291|28718121|28718268_DN
ENSG00000144840|RABL3|chr3|-|SE|120694152|120694224|120690448|120690487|120698422|120698520	-0.072	ENSG00000144840|RABL3|chr3|-|SE|120694152|120694224|120690448|120690487|120698422|120698520_DN
ENSG00000144034|TPRKB|chr2|-|SE|73732583|73732700|73731905|73732285|73734428|73734588	-0.072	ENSG00000144034|TPRKB|chr2|-|SE|73732583|73732700|73731905|73732285|73734428|73734588_DN
ENSG00000177410|ZFAS1|chr20|+|SE|49280902|49280964|49280484|49280570|49289044|49289260	-0.072	ENSG00000177410|ZFAS1|chr20|+|SE|49280902|49280964|49280484|49280570|49289044|49289260_DN
ENSG00000151498|ACAD8|chr11|+|MXE|134257087|134257257|134258514|134258624|134256547|134256648|134259007|134259084	-0.071	ENSG00000151498|ACAD8|chr11|+|MXE|134257087|134257257|134258514|134258624|134256547|134256648|134259007|134259084_DN
ENSG00000153094|BCL2L11|chr2|+|SE|111153779|111153904|111150043|111150147|111164132|111164231	-0.071	ENSG00000153094|BCL2L11|chr2|+|SE|111153779|111153904|111150043|111150147|111164132|111164231_DN
ENSG00000141551|CSNK1D|chr17|-|MXE|82253015|82253244|82255428|82255577|82252433|82252604|82265685|82265796	-0.071	ENSG00000141551|CSNK1D|chr17|-|MXE|82253015|82253244|82255428|82255577|82252433|82252604|82265685|82265796_DN
ENSG00000175066|GK5|chr3|-|A3SS|142177481|142177605|142177481|142177576|142181460|142181565	-0.071	ENSG00000175066|GK5|chr3|-|A3SS|142177481|142177605|142177481|142177576|142181460|142181565_DN
ENSG00000126777|KTN1|chr14|+|SE|55651286|55651375|55650568|55650637|55651889|55651927	-0.071	ENSG00000126777|KTN1|chr14|+|SE|55651286|55651375|55650568|55650637|55651889|55651927_DN
ENSG00000099949|LZTR1|chr22|+|RI|20996695|20996966|20996695|20996801|20996885|20996966	-0.071	ENSG00000099949|LZTR1|chr22|+|RI|20996695|20996966|20996695|20996801|20996885|20996966_DN
ENSG00000166986|MARS|chr12|+|A3SS|57512235|57512353|57512302|57512353|57512007|57512103	-0.071	ENSG00000166986|MARS|chr12|+|A3SS|57512235|57512353|57512302|57512353|57512007|57512103_DN
ENSG00000171453|POLR1C|chr6|+|RI|43519705|43520427|43519705|43520185|43520274|43520427	-0.071	ENSG00000171453|POLR1C|chr6|+|RI|43519705|43520427|43519705|43520185|43520274|43520427_DN
ENSG00000075856|SART3|chr12|-|A3SS|108544426|108544532|108544426|108544478|108545138|108545323	-0.071	ENSG00000075856|SART3|chr12|-|A3SS|108544426|108544532|108544426|108544478|108545138|108545323_DN
ENSG00000197912|SPG7|chr16|+|MXE|89536764|89536948|89540943|89542279|89532462|89532636|89544647|89544772	-0.071	ENSG00000197912|SPG7|chr16|+|MXE|89536764|89536948|89540943|89542279|89532462|89532636|89544647|89544772_DN
ENSG00000154114|TBCEL|chr11|+|SE|121057507|121057614|121055051|121055308|121058344|121058471	-0.071	ENSG00000154114|TBCEL|chr11|+|SE|121057507|121057614|121055051|121055308|121058344|121058471_DN
ENSG00000113742|CPEB4|chr5|+|SE|173943025|173943049|173910522|173910604|173944966|173945140	-0.07	ENSG00000113742|CPEB4|chr5|+|SE|173943025|173943049|173910522|173910604|173944966|173945140_DN
ENSG00000133106|EPSTI1|chr13|-|SE|42889210|42889242|42886387|42888502|42895008|42895108	-0.07	ENSG00000133106|EPSTI1|chr13|-|SE|42889210|42889242|42886387|42888502|42895008|42895108_DN
ENSG00000188186|LAMTOR4|chr7|+|SE|100149498|100149565|100148933|100148975|100153399|100153517	-0.07	ENSG00000188186|LAMTOR4|chr7|+|SE|100149498|100149565|100148933|100148975|100153399|100153517_DN
ENSG00000169288|MRPL1|chr4|+|SE|77906945|77907210|77894138|77894250|77909265|77909312	-0.07	ENSG00000169288|MRPL1|chr4|+|SE|77906945|77907210|77894138|77894250|77909265|77909312_DN
ENSG00000240344|PPIL3|chr2|-|MXE|200882341|200882435|200885261|200885367|200881420|200881488|200885697|200885772	-0.07	ENSG00000240344|PPIL3|chr2|-|MXE|200882341|200882435|200885261|200885367|200881420|200881488|200885697|200885772_DN
ENSG00000118600|RXYLT1|chr12|+|SE|63782540|63782704|63781018|63781174|63784969|63785072	-0.07	ENSG00000118600|RXYLT1|chr12|+|SE|63782540|63782704|63781018|63781174|63784969|63785072_DN
ENSG00000064115|TM7SF3|chr12|-|SE|27003235|27003390|26999525|26999676|27014077|27014384	-0.07	ENSG00000064115|TM7SF3|chr12|-|SE|27003235|27003390|26999525|26999676|27014077|27014384_DN
ENSG00000116750|UCHL5|chr1|-|SE|193027874|193027955|193023843|193023946|193028084|193028148	-0.07	ENSG00000116750|UCHL5|chr1|-|SE|193027874|193027955|193023843|193023946|193028084|193028148_DN
ENSG00000105698|USF2|chr19|+|RI|35278697|35279074|35278697|35278792|35278969|35279074	-0.07	ENSG00000105698|USF2|chr19|+|RI|35278697|35279074|35278697|35278792|35278969|35279074_DN
ENSG00000138658|ZGRF1|chr4|-|SE|112629758|112630015|112623816|112623876|112631929|112632010	-0.07	ENSG00000138658|ZGRF1|chr4|-|SE|112629758|112630015|112623816|112623876|112631929|112632010_DN
ENSG00000106400|ZNHIT1|chr7|+|SE|101218318|101221796|101218180|101218217|101222603|101222774	-0.07	ENSG00000106400|ZNHIT1|chr7|+|SE|101218318|101221796|101218180|101218217|101222603|101222774_DN
ENSG00000204427|ABHD16A|chr6|-|RI|31688040|31688305|31688040|31688103|31688248|31688305	-0.069	ENSG00000204427|ABHD16A|chr6|-|RI|31688040|31688305|31688040|31688103|31688248|31688305_DN
ENSG00000123130|ACOT9|chrX|-|SE|23734340|23734367|23733171|23733217|23735918|23736016	-0.069	ENSG00000123130|ACOT9|chrX|-|SE|23734340|23734367|23733171|23733217|23735918|23736016_DN
ENSG00000168374|ARF4|chr3|-|SE|57583897|57584007|57577315|57577387|57584383|57584464	-0.069	ENSG00000168374|ARF4|chr3|-|SE|57583897|57584007|57577315|57577387|57584383|57584464_DN
ENSG00000104763|ASAH1|chr8|-|MXE|18069791|18069872|18071299|18071390|18067219|18067298|18075540|18075587	-0.069	ENSG00000104763|ASAH1|chr8|-|MXE|18069791|18069872|18071299|18071390|18067219|18067298|18075540|18075587_DN
ENSG00000101844|ATG4A|chrX|+|SE|108126792|108127094|108126076|108126187|108128780|108128852	-0.069	ENSG00000101844|ATG4A|chrX|+|SE|108126792|108127094|108126076|108126187|108128780|108128852_DN
ENSG00000131375|CAPN7|chr3|+|SE|15210801|15210922|15206151|15206597|15212103|15212212	-0.069	ENSG00000131375|CAPN7|chr3|+|SE|15210801|15210922|15206151|15206597|15212103|15212212_DN
ENSG00000137752|CASP1|chr11|-|SE|105026225|105026356|105025507|105025600|105026841|105026951	-0.069	ENSG00000137752|CASP1|chr11|-|SE|105026225|105026356|105025507|105025600|105026841|105026951_DN
ENSG00000102390|PBDC1|chrX|+|SE|76176880|76176992|76175472|76175613|76177615|76178204	-0.069	ENSG00000102390|PBDC1|chrX|+|SE|76176880|76176992|76175472|76175613|76177615|76178204_DN
ENSG00000150593|PDCD4|chr10|+|SE|110876669|110876753|110875965|110876070|110881232|110881535	-0.069	ENSG00000150593|PDCD4|chr10|+|SE|110876669|110876753|110875965|110876070|110881232|110881535_DN
ENSG00000184863|RBM33|chr7|+|A3SS|155711172|155711455|155711202|155711455|155706859|155707068	-0.069	ENSG00000184863|RBM33|chr7|+|A3SS|155711172|155711455|155711202|155711455|155706859|155707068_DN
ENSG00000164808|SPIDR|chr8|+|SE|47396375|47396626|47293866|47294030|47407860|47407961	-0.069	ENSG00000164808|SPIDR|chr8|+|SE|47396375|47396626|47293866|47294030|47407860|47407961_DN
ENSG00000007255|TRAPPC6A|chr19|-|SE|45165126|45165194|45164724|45164970|45178092|45178211	-0.069	ENSG00000007255|TRAPPC6A|chr19|-|SE|45165126|45165194|45164724|45164970|45178092|45178211_DN
ENSG00000137871|ZNF280D|chr15|-|SE|56707081|56707143|56704120|56704267|56707262|56707306	-0.069	ENSG00000137871|ZNF280D|chr15|-|SE|56707081|56707143|56704120|56704267|56707262|56707306_DN
ENSG00000136279|DBNL|chr7|+|MXE|44051829|44051942|44052866|44052941|44050224|44050280|44056756|44056903	-0.068	ENSG00000136279|DBNL|chr7|+|MXE|44051829|44051942|44052866|44052941|44050224|44050280|44056756|44056903_DN
ENSG00000169919|GUSB|chr7|-|SE|65979398|65979541|65976014|65976202|65980223|65980409	-0.068	ENSG00000169919|GUSB|chr7|-|SE|65979398|65979541|65976014|65976202|65980223|65980409_DN
ENSG00000101460|MAP1LC3A|chr20|+|RI|34559735|34560345|34559735|34559905|34560171|34560345	-0.068	ENSG00000101460|MAP1LC3A|chr20|+|RI|34559735|34560345|34559735|34559905|34560171|34560345_DN
ENSG00000173542|MOB1B|chr4|+|SE|70950699|70950811|70902377|70902550|70958873|70959040	-0.068	ENSG00000173542|MOB1B|chr4|+|SE|70950699|70950811|70902377|70902550|70958873|70959040_DN
ENSG00000144283|PKP4|chr2|+|A3SS|158624954|158625427|158625124|158625427|158621230|158621421	-0.068	ENSG00000144283|PKP4|chr2|+|A3SS|158624954|158625427|158625124|158625427|158621230|158621421_DN
ENSG00000100614|PPM1A|chr14|+|SE|60250379|60250481|60249440|60249677|60282683|60283537	-0.068	ENSG00000100614|PPM1A|chr14|+|SE|60250379|60250481|60249440|60249677|60282683|60283537_DN
ENSG00000168061|SAC3D1|chr11|+|SE|65043024|65043164|65041244|65041866|65044224|65044673	-0.068	ENSG00000168061|SAC3D1|chr11|+|SE|65043024|65043164|65041244|65041866|65044224|65044673_DN
ENSG00000147955|SIGMAR1|chr9|-|RI|34636996|34637420|34636996|34637089|34637266|34637420	-0.068	ENSG00000147955|SIGMAR1|chr9|-|RI|34636996|34637420|34636996|34637089|34637266|34637420_DN
ENSG00000161265|U2AF1L4|chr19|-|RI|35742528|35743904|35742528|35742803|35743808|35743904	-0.068	ENSG00000161265|U2AF1L4|chr19|-|RI|35742528|35743904|35742528|35742803|35743808|35743904_DN
ENSG00000109046|WSB1|chr17|+|A3SS|27301787|27301956|27301880|27301956|27294113|27294435	-0.068	ENSG00000109046|WSB1|chr17|+|A3SS|27301787|27301956|27301880|27301956|27294113|27294435_DN
ENSG00000011198|ABHD5|chr3|+|SE|43714946|43715058|43711708|43711863|43717670|43717857	-0.067	ENSG00000011198|ABHD5|chr3|+|SE|43714946|43715058|43711708|43711863|43717670|43717857_DN
ENSG00000130429|ARPC1B|chr7|+|SE|99377337|99377439|99374729|99374781|99385701|99385778	-0.067	ENSG00000130429|ARPC1B|chr7|+|SE|99377337|99377439|99374729|99374781|99385701|99385778_DN
ENSG00000125447|GGA3|chr17|-|A3SS|75237981|75238389|75237981|75238090|75238651|75238762	-0.067	ENSG00000125447|GGA3|chr17|-|A3SS|75237981|75238389|75237981|75238090|75238651|75238762_DN
ENSG00000030582|GRN|chr17|+|SE|44345530|44345605|44345301|44345334|44349157|44349302	-0.067	ENSG00000030582|GRN|chr17|+|SE|44345530|44345605|44345301|44345334|44349157|44349302_DN
ENSG00000155229|MMS19|chr10|-|SE|97484102|97484151|97480894|97481042|97498272|97498384	-0.067	ENSG00000155229|MMS19|chr10|-|SE|97484102|97484151|97480894|97481042|97498272|97498384_DN
ENSG00000131408|NR1H2|chr19|+|RI|50376472|50376826|50376472|50376576|50376718|50376826	-0.067	ENSG00000131408|NR1H2|chr19|+|RI|50376472|50376826|50376472|50376576|50376718|50376826_DN
ENSG00000061936|SFSWAP|chr12|+|A5SS|131714070|131714240|131714070|131714193|131714821|131714953	-0.067	ENSG00000061936|SFSWAP|chr12|+|A5SS|131714070|131714240|131714070|131714193|131714821|131714953_DN
ENSG00000169762|TAPT1|chr4|-|SE|16202461|16202580|16191360|16191523|16226258|16226471	-0.067	ENSG00000169762|TAPT1|chr4|-|SE|16202461|16202580|16191360|16191523|16226258|16226471_DN
ENSG00000140416|TPM1|chr15|+|SE|63061712|63061788|63061197|63061273|63062214|63062277	-0.067	ENSG00000140416|TPM1|chr15|+|SE|63061712|63061788|63061197|63061273|63062214|63062277_DN
ENSG00000119596|YLPM1|chr14|+|SE|74824255|74824307|74821056|74821137|74829212|74829343	-0.067	ENSG00000119596|YLPM1|chr14|+|SE|74824255|74824307|74821056|74821137|74829212|74829343_DN
ENSG00000214655|ZSWIM8|chr10|+|RI|73800639|73801195|73800639|73800759|73801084|73801195	-0.067	ENSG00000214655|ZSWIM8|chr10|+|RI|73800639|73801195|73800639|73800759|73801084|73801195_DN
ENSG00000233461|AL445524.1|chr1|-|SE|231524425|231524547|231522516|231522637|231527337|231527415	-0.066	ENSG00000233461|AL445524.1|chr1|-|SE|231524425|231524547|231522516|231522637|231527337|231527415_DN
ENSG00000140750|ARHGAP17|chr16|-|SE|24927683|24927732|24919394|24920260|24930783|24931160	-0.066	ENSG00000140750|ARHGAP17|chr16|-|SE|24927683|24927732|24919394|24920260|24930783|24931160_DN
ENSG00000173575|CHD2|chr15|+|MXE|92991346|92991430|92991475|92991517|92985497|92985673|92992858|92992998	-0.066	ENSG00000173575|CHD2|chr15|+|MXE|92991346|92991430|92991475|92991517|92985497|92985673|92992858|92992998_DN
ENSG00000124795|DEK|chr6|-|SE|18258303|18258405|18257952|18258062|18263842|18263996	-0.066	ENSG00000124795|DEK|chr6|-|SE|18258303|18258405|18257952|18258062|18263842|18263996_DN
ENSG00000115677|HDLBP|chr2|-|SE|241268957|241269295|241268476|241268541|241272760|241272834	-0.066	ENSG00000115677|HDLBP|chr2|-|SE|241268957|241269295|241268476|241268541|241272760|241272834_DN
ENSG00000123562|MORF4L2|chrX|-|SE|103678498|103678651|103675499|103677051|103685170|103685260	-0.066	ENSG00000123562|MORF4L2|chrX|-|SE|103678498|103678651|103675499|103677051|103685170|103685260_DN
ENSG00000188895|MSL1|chr17|+|SE|40131536|40131584|40129244|40129627|40132033|40132042	-0.066	ENSG00000188895|MSL1|chr17|+|SE|40131536|40131584|40129244|40129627|40132033|40132042_DN
ENSG00000162367|TAL1|chr1|-|SE|47225442|47225889|47224003|47224098|47229195|47229351	-0.066	ENSG00000162367|TAL1|chr1|-|SE|47225442|47225889|47224003|47224098|47229195|47229351_DN
ENSG00000284770|TBCE|chr1|+|RI|235436385|235436608|235436385|235436450|235436543|235436608	-0.066	ENSG00000284770|TBCE|chr1|+|RI|235436385|235436608|235436385|235436450|235436543|235436608_DN
ENSG00000178307|TMEM11|chr17|-|SE|21211066|21211227|21198255|21198840|21214090|21214163	-0.066	ENSG00000178307|TMEM11|chr17|-|SE|21211066|21211227|21198255|21198840|21214090|21214163_DN
ENSG00000146757|ZNF92|chr7|+|SE|65387901|65388028|65373798|65374000|65388805|65388901	-0.066	ENSG00000146757|ZNF92|chr7|+|SE|65387901|65388028|65373798|65374000|65388805|65388901_DN
ENSG00000149182|ARFGAP2|chr11|-|SE|47175014|47175098|47173758|47173840|47175181|47175313	-0.065	ENSG00000149182|ARFGAP2|chr11|-|SE|47175014|47175098|47173758|47173840|47175181|47175313_DN
ENSG00000157764|BRAF|chr7|-|A3SS|140800361|140800481|140800361|140800462|140801411|140801560	-0.065	ENSG00000157764|BRAF|chr7|-|A3SS|140800361|140800481|140800361|140800462|140801411|140801560_DN
ENSG00000133742|CA1|chr8|-|SE|85351730|85351784|85342748|85342825|85378045|85378108	-0.065	ENSG00000133742|CA1|chr8|-|SE|85351730|85351784|85342748|85342825|85378045|85378108_DN
ENSG00000112576|CCND3|chr6|-|SE|41940369|41940585|41936854|41937394|42048500|42048676	-0.065	ENSG00000112576|CCND3|chr6|-|SE|41940369|41940585|41936854|41937394|42048500|42048676_DN
ENSG00000141030|COPS3|chr17|-|SE|17270757|17270807|17267884|17267977|17270895|17270976	-0.065	ENSG00000141030|COPS3|chr17|-|SE|17270757|17270807|17267884|17267977|17270895|17270976_DN
ENSG00000023697|DERA|chr12|+|A3SS|15958187|15958335|15958239|15958335|15956935|15957033	-0.065	ENSG00000023697|DERA|chr12|+|A3SS|15958187|15958335|15958239|15958335|15956935|15957033_DN
ENSG00000173020|GRK2|chr11|+|RI|67284846|67285188|67284846|67284983|67285074|67285188	-0.065	ENSG00000173020|GRK2|chr11|+|RI|67284846|67285188|67284846|67284983|67285074|67285188_DN
ENSG00000213614|HEXA|chr15|-|A5SS|72353690|72355624|72355558|72355624|72353067|72353178	-0.065	ENSG00000213614|HEXA|chr15|-|A5SS|72353690|72355624|72355558|72355624|72353067|72353178_DN
ENSG00000205581|HMGN1|chr21|-|MXE|39347246|39347292|39347378|39347483|39345145|39345274|39348291|39348339	-0.065	ENSG00000205581|HMGN1|chr21|-|MXE|39347246|39347292|39347378|39347483|39345145|39345274|39348291|39348339_DN
ENSG00000178035|IMPDH2|chr3|-|SE|49028198|49028322|49027710|49027916|49028430|49028806	-0.065	ENSG00000178035|IMPDH2|chr3|-|SE|49028198|49028322|49027710|49027916|49028430|49028806_DN
ENSG00000156650|KAT6B|chr10|+|SE|74985079|74985241|74981786|74981928|74989018|74989096	-0.065	ENSG00000156650|KAT6B|chr10|+|SE|74985079|74985241|74981786|74981928|74989018|74989096_DN
ENSG00000122033|MTIF3|chr13|-|SE|27449851|27449918|27445087|27445156|27450508|27450564	-0.065	ENSG00000122033|MTIF3|chr13|-|SE|27449851|27449918|27445087|27445156|27450508|27450564_DN
ENSG00000172936|MYD88|chr3|+|SE|38140387|38140568|38139863|38139998|38140756|38140848	-0.065	ENSG00000172936|MYD88|chr3|+|SE|38140387|38140568|38139863|38139998|38140756|38140848_DN
ENSG00000132780|NASP|chr1|+|MXE|45602254|45602365|45604935|45605016|45591222|45591270|45606481|45606591	-0.065	ENSG00000132780|NASP|chr1|+|MXE|45602254|45602365|45604935|45605016|45591222|45591270|45606481|45606591_DN
ENSG00000117691|NENF|chr1|+|SE|212442564|212442625|212432886|212433120|212444338|212444442	-0.065	ENSG00000117691|NENF|chr1|+|SE|212442564|212442625|212432886|212433120|212444338|212444442_DN
ENSG00000183426|NPIPA1|chr16|+|RI|14935159|14935397|14935159|14935276|14935344|14935397	-0.065	ENSG00000183426|NPIPA1|chr16|+|RI|14935159|14935397|14935159|14935276|14935344|14935397_DN
ENSG00000124588|NQO2|chr6|+|SE|3004494|3004651|2999988|3000085|3006467|3006559	-0.065	ENSG00000124588|NQO2|chr6|+|SE|3004494|3004651|2999988|3000085|3006467|3006559_DN
ENSG00000116731|PRDM2|chr1|+|SE|13773077|13773188|13749360|13749487|13816426|13816570	-0.065	ENSG00000116731|PRDM2|chr1|+|SE|13773077|13773188|13749360|13749487|13816426|13816570_DN
ENSG00000140368|PSTPIP1|chr15|+|A3SS|77027799|77027914|77027851|77027914|77025497|77025604	-0.065	ENSG00000140368|PSTPIP1|chr15|+|A3SS|77027799|77027914|77027851|77027914|77025497|77025604_DN
ENSG00000135899|SP110|chr2|-|SE|230216780|230216928|230214949|230215118|230219873|230219950	-0.065	ENSG00000135899|SP110|chr2|-|SE|230216780|230216928|230214949|230215118|230219873|230219950_DN
ENSG00000126088|UROD|chr1|+|RI|45013908|45014836|45013908|45014070|45014735|45014836	-0.065	ENSG00000126088|UROD|chr1|+|RI|45013908|45014836|45013908|45014070|45014735|45014836_DN
ENSG00000119725|ZNF410|chr14|+|A5SS|73892026|73892208|73892026|73892107|73893796|73893932	-0.065	ENSG00000119725|ZNF410|chr14|+|A5SS|73892026|73892208|73892026|73892107|73893796|73893932_DN
ENSG00000182885|ADGRG3|chr16|+|SE|57683931|57684212|57680504|57680617|57684389|57684483	-0.064	ENSG00000182885|ADGRG3|chr16|+|SE|57683931|57684212|57680504|57680617|57684389|57684483_DN
ENSG00000173209|AHSA2P|chr2|+|SE|61183546|61183662|61181319|61181405|61184711|61184800	-0.064	ENSG00000173209|AHSA2P|chr2|+|SE|61183546|61183662|61181319|61181405|61184711|61184800_DN
ENSG00000123329|ARHGAP9|chr12|-|A3SS|57476589|57476963|57476589|57476651|57477155|57477269	-0.064	ENSG00000123329|ARHGAP9|chr12|-|A3SS|57476589|57476963|57476589|57476651|57477155|57477269_DN
ENSG00000130429|ARPC1B|chr7|+|SE|99377357|99377455|99374729|99374781|99385701|99385778	-0.064	ENSG00000130429|ARPC1B|chr7|+|SE|99377357|99377455|99374729|99374781|99385701|99385778_DN
ENSG00000105383|CD33|chr19|+|SE|51226308|51226356|51225802|51226081|51235156|51235253	-0.064	ENSG00000105383|CD33|chr19|+|SE|51226308|51226356|51225802|51226081|51235156|51235253_DN
ENSG00000175203|DCTN2|chr12|-|SE|57538518|57538524|57535748|57535845|57546027|57546096	-0.064	ENSG00000175203|DCTN2|chr12|-|SE|57538518|57538524|57535748|57535845|57546027|57546096_DN
ENSG00000140374|ETFA|chr15|-|SE|76292618|76292700|76292430|76292513|76311349|76311404	-0.064	ENSG00000140374|ETFA|chr15|-|SE|76292618|76292700|76292430|76292513|76311349|76311404_DN
ENSG00000137965|IFI44|chr1|+|SE|78650185|78650652|78649830|78649905|78654242|78654279	-0.064	ENSG00000137965|IFI44|chr1|+|SE|78650185|78650652|78649830|78649905|78654242|78654279_DN
ENSG00000135365|PHF21A|chr11|-|SE|46049399|46049497|45979759|45979966|46076753|46076819	-0.064	ENSG00000135365|PHF21A|chr11|-|SE|46049399|46049497|45979759|45979966|46076753|46076819_DN
ENSG00000101347|SAMHD1|chr20|-|A3SS|36916948|36917096|36916948|36917049|36919363|36919519	-0.064	ENSG00000101347|SAMHD1|chr20|-|A3SS|36916948|36917096|36916948|36917049|36919363|36919519_DN
ENSG00000116698|SMG7|chr1|+|SE|183502252|183502391|183472477|183472649|183512836|183512868	-0.064	ENSG00000116698|SMG7|chr1|+|SE|183502252|183502391|183472477|183472649|183512836|183512868_DN
ENSG00000124214|STAU1|chr20|-|SE|49179121|49179244|49174194|49174269|49188115|49188367	-0.064	ENSG00000124214|STAU1|chr20|-|SE|49179121|49179244|49174194|49174269|49188115|49188367_DN
ENSG00000054118|THRAP3|chr1|+|SE|36225411|36225463|36224432|36224505|36259381|36259484	-0.064	ENSG00000054118|THRAP3|chr1|+|SE|36225411|36225463|36224432|36224505|36259381|36259484_DN
ENSG00000011260|UTP18|chr17|+|A3SS|51288028|51288203|51288123|51288203|51285244|51285368	-0.064	ENSG00000011260|UTP18|chr17|+|A3SS|51288028|51288203|51288123|51288203|51285244|51285368_DN
ENSG00000117448|AKR1A1|chr1|+|SE|45568484|45568684|45567981|45568177|45568926|45568999	-0.063	ENSG00000117448|AKR1A1|chr1|+|SE|45568484|45568684|45567981|45568177|45568926|45568999_DN
ENSG00000179583|CIITA|chr16|+|RI|10906498|10909187|10906498|10908149|10909028|10909187	-0.063	ENSG00000179583|CIITA|chr16|+|RI|10906498|10909187|10906498|10908149|10909028|10909187_DN
ENSG00000114346|ECT2|chr3|+|SE|172752149|172752272|172750762|172750857|172754508|172754660	-0.063	ENSG00000114346|ECT2|chr3|+|SE|172752149|172752272|172750762|172750857|172754508|172754660_DN
ENSG00000105202|FBL|chr19|-|A5SS|39840682|39840787|39840721|39840787|39840413|39840509	-0.063	ENSG00000105202|FBL|chr19|-|A5SS|39840682|39840787|39840721|39840787|39840413|39840509_DN
ENSG00000132376|INPP5K|chr17|-|SE|1515426|1515585|1513871|1513979|1516455|1516661	-0.063	ENSG00000132376|INPP5K|chr17|-|SE|1515426|1515585|1513871|1513979|1516455|1516661_DN
ENSG00000135596|MICAL1|chr6|-|RI|109446135|109446772|109446135|109446357|109446695|109446772	-0.063	ENSG00000135596|MICAL1|chr6|-|RI|109446135|109446772|109446135|109446357|109446695|109446772_DN
ENSG00000140612|SEC11A|chr15|-|MXE|84680712|84680832|84687624|84687774|84670724|84670782|84691534|84691644	-0.063	ENSG00000140612|SEC11A|chr15|-|MXE|84680712|84680832|84687624|84687774|84670724|84670782|84691534|84691644_DN
ENSG00000142864|SERBP1|chr1|-|A3SS|67424199|67424322|67424199|67424277|67424887|67424959	-0.063	ENSG00000142864|SERBP1|chr1|-|A3SS|67424199|67424322|67424199|67424277|67424887|67424959_DN
ENSG00000134602|STK26|chrX|+|SE|132069477|132069663|132068411|132068569|132071068|132071217	-0.063	ENSG00000134602|STK26|chrX|+|SE|132069477|132069663|132068411|132068569|132071068|132071217_DN
ENSG00000142185|TRPM2|chr21|+|SE|44422269|44422419|44418422|44418555|44423644|44423732	-0.063	ENSG00000142185|TRPM2|chr21|+|SE|44422269|44422419|44418422|44418555|44423644|44423732_DN
ENSG00000100568|VTI1B|chr14|-|SE|67662476|67662535|67659730|67659922|67674374|67674831	-0.063	ENSG00000100568|VTI1B|chr14|-|SE|67662476|67662535|67659730|67659922|67674374|67674831_DN
ENSG00000177479|ARIH2|chr3|+|MXE|48927461|48927813|48945135|48945181|48924717|48924839|48961611|48961679	-0.062	ENSG00000177479|ARIH2|chr3|+|MXE|48927461|48927813|48945135|48945181|48924717|48924839|48961611|48961679_DN
ENSG00000112695|COX7A2|chr6|-|SE|75240276|75240385|75237786|75237988|75241175|75241265	-0.062	ENSG00000112695|COX7A2|chr6|-|SE|75240276|75240385|75237786|75237988|75241175|75241265_DN
ENSG00000136770|DNAJC1|chr10|-|SE|21928505|21928552|21920797|21920963|21929039|21929141	-0.062	ENSG00000136770|DNAJC1|chr10|-|SE|21928505|21928552|21920797|21920963|21929039|21929141_DN
ENSG00000104687|GSR|chr8|-|MXE|30689160|30689319|30692968|30693055|30684087|30684199|30696379|30696479	-0.062	ENSG00000104687|GSR|chr8|-|MXE|30689160|30689319|30692968|30693055|30684087|30684199|30696379|30696479_DN
ENSG00000073614|KDM5A|chr12|-|SE|286125|286207|285455|285662|292758|292925	-0.062	ENSG00000073614|KDM5A|chr12|-|SE|286125|286207|285455|285662|292758|292925_DN
ENSG00000078403|MLLT10|chr10|+|A3SS|21740029|21740236|21740153|21740236|21735138|21735235	-0.062	ENSG00000078403|MLLT10|chr10|+|A3SS|21740029|21740236|21740153|21740236|21735138|21735235_DN
ENSG00000092841|MYL6|chr12|+|RI|56158357|56158711|56158357|56158404|56158683|56158711	-0.062	ENSG00000092841|MYL6|chr12|+|RI|56158357|56158711|56158357|56158404|56158683|56158711_DN
ENSG00000138750|NUP54|chr4|-|A3SS|76117663|76117774|76117663|76117742|76118074|76118194	-0.062	ENSG00000138750|NUP54|chr4|-|A3SS|76117663|76117774|76117663|76117742|76118074|76118194_DN
ENSG00000121716|PILRB|chr7|+|A3SS|100358689|100359008|100358932|100359008|100358219|100358366	-0.062	ENSG00000121716|PILRB|chr7|+|A3SS|100358689|100359008|100358932|100359008|100358219|100358366_DN
ENSG00000110075|PPP6R3|chr11|+|SE|68583042|68583129|68575957|68576043|68587926|68588024	-0.062	ENSG00000110075|PPP6R3|chr11|+|SE|68583042|68583129|68575957|68576043|68587926|68588024_DN
ENSG00000111247|RAD51AP1|chr12|+|SE|4546308|4546418|4543762|4543904|4548091|4548175	-0.062	ENSG00000111247|RAD51AP1|chr12|+|SE|4546308|4546418|4543762|4543904|4548091|4548175_DN
ENSG00000102524|TNFSF13B|chr13|+|SE|108286802|108286859|108270226|108270424|108303252|108303365	-0.062	ENSG00000102524|TNFSF13B|chr13|+|SE|108286802|108286859|108270226|108270424|108303252|108303365_DN
ENSG00000103145|HCFC1R1|chr16|-|RI|3023232|3023530|3023232|3023361|3023473|3023530	-0.061	ENSG00000103145|HCFC1R1|chr16|-|RI|3023232|3023530|3023232|3023361|3023473|3023530_DN
ENSG00000129351|ILF3|chr19|+|SE|10687345|10687708|10683916|10683970|10688549|10688678	-0.061	ENSG00000129351|ILF3|chr19|+|SE|10687345|10687708|10683916|10683970|10688549|10688678_DN
ENSG00000185158|LRRC37B|chr17|+|SE|32020696|32020803|32007973|32008132|32021392|32021859	-0.061	ENSG00000185158|LRRC37B|chr17|+|SE|32020696|32020803|32007973|32008132|32021392|32021859_DN
ENSG00000102882|MAPK3|chr16|-|SE|30115594|30115645|30114545|30114708|30116635|30116790	-0.061	ENSG00000102882|MAPK3|chr16|-|SE|30115594|30115645|30114545|30114708|30116635|30116790_DN
ENSG00000070047|PHRF1|chr11|+|A3SS|605604|605724|605607|605724|605118|605300	-0.061	ENSG00000070047|PHRF1|chr11|+|A3SS|605604|605724|605607|605724|605118|605300_DN
ENSG00000073921|PICALM|chr11|-|SE|86023415|86023541|86022377|86022469|86026291|86026367	-0.061	ENSG00000073921|PICALM|chr11|-|SE|86023415|86023541|86022377|86022469|86026291|86026367_DN
ENSG00000013306|SLC25A39|chr17|-|A3SS|44322418|44322552|44322418|44322528|44323283|44323343	-0.061	ENSG00000013306|SLC25A39|chr17|-|A3SS|44322418|44322552|44322418|44322528|44323283|44323343_DN
ENSG00000186908|ZDHHC17|chr12|+|SE|76821057|76821167|76815856|76816019|76822405|76822531	-0.061	ENSG00000186908|ZDHHC17|chr12|+|SE|76821057|76821167|76815856|76816019|76822405|76822531_DN
ENSG00000179195|ZNF664|chr12|+|SE|123988045|123988138|123973885|123974020|124011380|124011441	-0.061	ENSG00000179195|ZNF664|chr12|+|SE|123988045|123988138|123973885|123974020|124011380|124011441_DN
ENSG00000104763|ASAH1|chr8|-|MXE|18069791|18069878|18071299|18071390|18067219|18067298|18075540|18075587	-0.06	ENSG00000104763|ASAH1|chr8|-|MXE|18069791|18069878|18071299|18071390|18067219|18067298|18075540|18075587_DN
ENSG00000115677|HDLBP|chr2|-|SE|241268828|241268953|241268476|241268541|241272760|241272813	-0.06	ENSG00000115677|HDLBP|chr2|-|SE|241268828|241268953|241268476|241268541|241272760|241272813_DN
ENSG00000050426|LETMD1|chr12|+|SE|51049033|51049185|51048300|51048478|51056349|51056502	-0.06	ENSG00000050426|LETMD1|chr12|+|SE|51049033|51049185|51048300|51048478|51056349|51056502_DN
ENSG00000135241|PNPLA8|chr7|-|SE|108521475|108521521|108514435|108515574|108526028|108526194	-0.06	ENSG00000135241|PNPLA8|chr7|-|SE|108521475|108521521|108514435|108515574|108526028|108526194_DN
ENSG00000113593|PPWD1|chr5|+|A3SS|65579423|65579613|65579484|65579613|65576878|65577069	-0.06	ENSG00000113593|PPWD1|chr5|+|A3SS|65579423|65579613|65579484|65579613|65576878|65577069_DN
ENSG00000110958|PTGES3|chr12|-|SE|56665631|56666266|56664775|56664800|56670274|56670364	-0.06	ENSG00000110958|PTGES3|chr12|-|SE|56665631|56666266|56664775|56664800|56670274|56670364_DN
ENSG00000140983|RHOT2|chr16|+|RI|670891|671203|670891|671000|671114|671203	-0.06	ENSG00000140983|RHOT2|chr16|+|RI|670891|671203|670891|671000|671114|671203_DN
ENSG00000143416|SELENBP1|chr1|-|MXE|151369003|151369189|151369441|151369554|151368198|151368319|151369712|151369769	-0.06	ENSG00000143416|SELENBP1|chr1|-|MXE|151369003|151369189|151369441|151369554|151368198|151368319|151369712|151369769_DN
ENSG00000143222|UFC1|chr1|+|SE|161158120|161158211|161157616|161157693|161158411|161158856	-0.06	ENSG00000143222|UFC1|chr1|+|SE|161158120|161158211|161157616|161157693|161158411|161158856_DN
ENSG00000066322|ELOVL1|chr1|-|SE|43365185|43365376|43364927|43365008|43365563|43365623	-0.059	ENSG00000066322|ELOVL1|chr1|-|SE|43365185|43365376|43364927|43365008|43365563|43365623_DN
ENSG00000139546|TARBP2|chr12|+|A3SS|53504611|53504815|53504697|53504815|53504396|53504469	-0.059	ENSG00000139546|TARBP2|chr12|+|A3SS|53504611|53504815|53504697|53504815|53504396|53504469_DN
ENSG00000157538|VPS26C|chr21|-|SE|37233361|37233442|37232376|37232451|37238459|37238609	-0.059	ENSG00000157538|VPS26C|chr21|-|SE|37233361|37233442|37232376|37232451|37238459|37238609_DN
ENSG00000023330|ALAS1|chr3|+|A3SS|52199209|52199440|52199220|52199440|52198671|52198848	-0.058	ENSG00000023330|ALAS1|chr3|+|A3SS|52199209|52199440|52199220|52199440|52198671|52198848_DN
ENSG00000119682|AREL1|chr14|-|SE|74698763|74698856|74692040|74692328|74712932|74713098	-0.058	ENSG00000119682|AREL1|chr14|-|SE|74698763|74698856|74692040|74692328|74712932|74713098_DN
ENSG00000026950|BTN3A1|chr6|+|RI|26409893|26410032|26409893|26409914|26410005|26410032	-0.058	ENSG00000026950|BTN3A1|chr6|+|RI|26409893|26410032|26409893|26409914|26410005|26410032_DN
ENSG00000120533|ENY2|chr8|+|A5SS|109334323|109334474|109334323|109334402|109336127|109336204	-0.058	ENSG00000120533|ENY2|chr8|+|A5SS|109334323|109334474|109334323|109334402|109336127|109336204_DN
ENSG00000143226|FCGR2A|chr1|+|SE|161510833|161510956|161509819|161510074|161513894|161513932	-0.058	ENSG00000143226|FCGR2A|chr1|+|SE|161510833|161510956|161509819|161510074|161513894|161513932_DN
ENSG00000111653|ING4|chr12|-|A3SS|6652270|6652418|6652270|6652309|6652661|6652767	-0.058	ENSG00000111653|ING4|chr12|-|A3SS|6652270|6652418|6652270|6652309|6652661|6652767_DN
ENSG00000130731|METTL26|chr16|-|A3SS|634888|635063|634888|634956|635280|635340	-0.058	ENSG00000130731|METTL26|chr16|-|A3SS|634888|635063|634888|634956|635280|635340_DN
ENSG00000182979|MTA1|chr14|+|SE|105468337|105468349|105466706|105466742|105469466|105469498	-0.058	ENSG00000182979|MTA1|chr14|+|SE|105468337|105468349|105466706|105466742|105469466|105469498_DN
ENSG00000278259|MYO19|chr17|-|SE|36515112|36515182|36514445|36514548|36515857|36515990	-0.058	ENSG00000278259|MYO19|chr17|-|SE|36515112|36515182|36514445|36514548|36515857|36515990_DN
ENSG00000127616|SMARCA4|chr19|+|SE|11039457|11039553|11034913|11035132|11041297|11041560	-0.058	ENSG00000127616|SMARCA4|chr19|+|SE|11039457|11039553|11034913|11035132|11041297|11041560_DN
ENSG00000145901|TNIP1|chr5|-|A3SS|151029948|151030747|151029948|151030673|151032286|151032383	-0.058	ENSG00000145901|TNIP1|chr5|-|A3SS|151029948|151030747|151029948|151030673|151032286|151032383_DN
ENSG00000163374|YY1AP1|chr1|-|A5SS|155672520|155672731|155672559|155672731|155670319|155670464	-0.058	ENSG00000163374|YY1AP1|chr1|-|A5SS|155672520|155672731|155672559|155672731|155670319|155670464_DN
ENSG00000158805|ZNF276|chr16|+|RI|89723136|89723709|89723136|89723183|89723278|89723709	-0.058	ENSG00000158805|ZNF276|chr16|+|RI|89723136|89723709|89723136|89723183|89723278|89723709_DN
ENSG00000179195|ZNF664|chr12|+|SE|123988042|123988138|123973122|123974020|124011380|124011441	-0.058	ENSG00000179195|ZNF664|chr12|+|SE|123988042|123988138|123973122|123974020|124011380|124011441_DN
ENSG00000106400|ZNHIT1|chr7|+|SE|101218318|101218485|101218165|101218217|101222603|101222774	-0.058	ENSG00000106400|ZNHIT1|chr7|+|SE|101218318|101218485|101218165|101218217|101222603|101222774_DN
ENSG00000119787|ATL2|chr2|-|SE|38354066|38354177|38343267|38343512|38377142|38377262	-0.057	ENSG00000119787|ATL2|chr2|-|SE|38354066|38354177|38343267|38343512|38377142|38377262_DN
ENSG00000141030|COPS3|chr17|-|SE|17276034|17276164|17270757|17271008|17281131|17281160	-0.057	ENSG00000141030|COPS3|chr17|-|SE|17276034|17276164|17270757|17271008|17281131|17281160_DN
ENSG00000107223|EDF1|chr9|-|A3SS|136862118|136862496|136862118|136862345|136862905|136862999	-0.057	ENSG00000107223|EDF1|chr9|-|A3SS|136862118|136862496|136862118|136862345|136862905|136862999_DN
ENSG00000068912|ERLEC1|chr2|+|SE|53808298|53808460|53801712|53801842|53809213|53809273	-0.057	ENSG00000068912|ERLEC1|chr2|+|SE|53808298|53808460|53801712|53801842|53809213|53809273_DN
ENSG00000171311|EXOSC1|chr10|-|SE|97443236|97443311|97440763|97441259|97445731|97445847	-0.057	ENSG00000171311|EXOSC1|chr10|-|SE|97443236|97443311|97440763|97441259|97445731|97445847_DN
ENSG00000136877|FPGS|chr9|+|SE|127808557|127808705|127808146|127808311|127808799|127808882	-0.057	ENSG00000136877|FPGS|chr9|+|SE|127808557|127808705|127808146|127808311|127808799|127808882_DN
ENSG00000111144|LTA4H|chr12|-|SE|96003837|96003981|96002989|96003064|96006313|96006409	-0.057	ENSG00000111144|LTA4H|chr12|-|SE|96003837|96003981|96002989|96003064|96006313|96006409_DN
ENSG00000133961|NUMB|chr14|-|SE|73366896|73366981|73355625|73355766|73409936|73410068	-0.057	ENSG00000133961|NUMB|chr14|-|SE|73366896|73366981|73355625|73355766|73409936|73410068_DN
ENSG00000204469|PRRC2A|chr6|+|RI|31636732|31637136|31636732|31636945|31637041|31637136	-0.057	ENSG00000204469|PRRC2A|chr6|+|RI|31636732|31637136|31636732|31636945|31637041|31637136_DN
ENSG00000211455|STK38L|chr12|+|SE|27312548|27312672|27309113|27309197|27314503|27314658	-0.057	ENSG00000211455|STK38L|chr12|+|SE|27312548|27312672|27309113|27309197|27314503|27314658_DN
ENSG00000186074|CD300LF|chr17|-|A3SS|74703034|74703143|74703034|74703098|74704477|74704816	-0.056	ENSG00000186074|CD300LF|chr17|-|A3SS|74703034|74703143|74703034|74703098|74704477|74704816_DN
ENSG00000106404|CLDN15|chr7|-|SE|101233872|101234116|101232832|101232914|101234277|101234442	-0.056	ENSG00000106404|CLDN15|chr7|-|SE|101233872|101234116|101232832|101232914|101234277|101234442_DN
ENSG00000102081|FMR1|chrX|+|A3SS|147944868|147945051|147944904|147945051|147943130|147943326	-0.056	ENSG00000102081|FMR1|chrX|+|A3SS|147944868|147945051|147944904|147945051|147943130|147943326_DN
ENSG00000100578|KIAA0586|chr14|+|SE|58440069|58440160|58432387|58432457|58442705|58442880	-0.056	ENSG00000100578|KIAA0586|chr14|+|SE|58440069|58440160|58432387|58432457|58442705|58442880_DN
ENSG00000172366|MCRIP2|chr16|+|RI|647416|647884|647416|647544|647782|647884	-0.056	ENSG00000172366|MCRIP2|chr16|+|RI|647416|647884|647416|647544|647782|647884_DN
ENSG00000123562|MORF4L2|chrX|-|SE|103678498|103678600|103675495|103677051|103685170|103685260	-0.056	ENSG00000123562|MORF4L2|chrX|-|SE|103678498|103678600|103675495|103677051|103685170|103685260_DN
ENSG00000198964|SGMS1|chr10|-|SE|50327204|50327322|50311261|50311415|50343491|50344345	-0.056	ENSG00000198964|SGMS1|chr10|-|SE|50327204|50327322|50311261|50311415|50343491|50344345_DN
ENSG00000116754|SRSF11|chr1|+|SE|70247116|70247149|70246817|70246907|70249951|70250047	-0.056	ENSG00000116754|SRSF11|chr1|+|SE|70247116|70247149|70246817|70246907|70249951|70250047_DN
ENSG00000119801|YPEL5|chr2|+|SE|30155814|30155910|30148244|30148541|30156627|30156787	-0.056	ENSG00000119801|YPEL5|chr2|+|SE|30155814|30155910|30148244|30148541|30156627|30156787_DN
ENSG00000137871|ZNF280D|chr15|-|SE|56707081|56707150|56704120|56704267|56707262|56707306	-0.056	ENSG00000137871|ZNF280D|chr15|-|SE|56707081|56707150|56704120|56704267|56707262|56707306_DN
ENSG00000151292|CSNK1G3|chr5|+|SE|123605338|123605362|123604723|123604830|123614341|123614455	-0.055	ENSG00000151292|CSNK1G3|chr5|+|SE|123605338|123605362|123604723|123604830|123614341|123614455_DN
ENSG00000013573|DDX11|chr12|+|SE|31089402|31089490|31089043|31089151|31089885|31089999	-0.055	ENSG00000013573|DDX11|chr12|+|SE|31089402|31089490|31089043|31089151|31089885|31089999_DN
ENSG00000124795|DEK|chr6|-|MXE|18258303|18258405|18263842|18263996|18257952|18258062|18264384|18264541	-0.055	ENSG00000124795|DEK|chr6|-|MXE|18258303|18258405|18263842|18263996|18257952|18258062|18264384|18264541_DN
ENSG00000164896|FASTK|chr7|-|RI|151076912|151078092|151076912|151077780|151077878|151078092	-0.055	ENSG00000164896|FASTK|chr7|-|RI|151076912|151078092|151076912|151077780|151077878|151078092_DN
ENSG00000139132|FGD4|chr12|+|SE|32624658|32624751|32624421|32624452|32624975|32625068	-0.055	ENSG00000139132|FGD4|chr12|+|SE|32624658|32624751|32624421|32624452|32624975|32625068_DN
ENSG00000141349|G6PC3|chr17|+|SE|44074968|44075087|44074679|44074770|44075309|44075451	-0.055	ENSG00000141349|G6PC3|chr17|+|SE|44074968|44075087|44074679|44074770|44075309|44075451_DN
ENSG00000130755|GMFG|chr19|-|SE|39329547|39329626|39328999|39329073|39333076|39333126	-0.055	ENSG00000130755|GMFG|chr19|-|SE|39329547|39329626|39328999|39329073|39333076|39333126_DN
ENSG00000168310|IRF2|chr4|-|A5SS|184418504|184418708|184418531|184418708|184418166|184418213	-0.055	ENSG00000168310|IRF2|chr4|-|A5SS|184418504|184418708|184418531|184418708|184418166|184418213_DN
ENSG00000225470|JPX|chrX|+|SE|73946998|73947374|73944583|73944662|73998767|73998844	-0.055	ENSG00000225470|JPX|chrX|+|SE|73946998|73947374|73944583|73944662|73998767|73998844_DN
ENSG00000109805|NCAPG|chr4|+|A5SS|17825381|17825567|17825381|17825561|17828277|17828388	-0.055	ENSG00000109805|NCAPG|chr4|+|A5SS|17825381|17825567|17825381|17825561|17828277|17828388_DN
ENSG00000196923|PDLIM7|chr5|-|MXE|177491403|177491420|177491806|177491976|177491009|177491146|177492404|177492435	-0.055	ENSG00000196923|PDLIM7|chr5|-|MXE|177491403|177491420|177491806|177491976|177491009|177491146|177492404|177492435_DN
ENSG00000123352|SPATS2|chr12|+|SE|49512861|49512905|49500069|49500205|49514554|49514613	-0.055	ENSG00000123352|SPATS2|chr12|+|SE|49512861|49512905|49500069|49500205|49514554|49514613_DN
ENSG00000004866|ST7|chr7|+|SE|117134123|117134192|117131884|117131960|117136080|117136235	-0.055	ENSG00000004866|ST7|chr7|+|SE|117134123|117134192|117131884|117131960|117136080|117136235_DN
ENSG00000134291|TMEM106C|chr12|+|SE|47965281|47965345|47964208|47964423|47968132|47968211	-0.055	ENSG00000134291|TMEM106C|chr12|+|SE|47965281|47965345|47964208|47964423|47968132|47968211_DN
ENSG00000114062|UBE3A|chr15|-|SE|25408619|25408684|25405460|25405502|25409087|25409207	-0.055	ENSG00000114062|UBE3A|chr15|-|SE|25408619|25408684|25405460|25405502|25409087|25409207_DN
ENSG00000109046|WSB1|chr17|+|SE|27301787|27301956|27294079|27294435|27304779|27304911	-0.055	ENSG00000109046|WSB1|chr17|+|SE|27301787|27301956|27294079|27294435|27304779|27304911_DN
ENSG00000134262|AP4B1|chr1|-|SE|113901235|113901383|113899903|113900400|113901754|113901885	-0.054	ENSG00000134262|AP4B1|chr1|-|SE|113901235|113901383|113899903|113900400|113901754|113901885_DN
ENSG00000152242|C18orf25|chr18|+|SE|46240004|46240187|46215810|46216595|46253696|46253823	-0.054	ENSG00000152242|C18orf25|chr18|+|SE|46240004|46240187|46215810|46216595|46253696|46253823_DN
ENSG00000013573|DDX11|chr12|+|A3SS|31089402|31090094|31089885|31090094|31089043|31089151	-0.054	ENSG00000013573|DDX11|chr12|+|A3SS|31089402|31090094|31089885|31090094|31089043|31089151_DN
ENSG00000105671|DDX49|chr19|+|SE|18920833|18920909|18920579|18920703|18921662|18921748	-0.054	ENSG00000105671|DDX49|chr19|+|SE|18920833|18920909|18920579|18920703|18921662|18921748_DN
ENSG00000153310|FAM49B|chr8|-|MXE|129904498|129904585|129912469|129912515|129903311|129903350|129970942|129970995	-0.054	ENSG00000153310|FAM49B|chr8|-|MXE|129904498|129904585|129912469|129912515|129903311|129903350|129970942|129970995_DN
ENSG00000127054|INTS11|chr1|-|A3SS|1319295|1319524|1319295|1319433|1320455|1320529	-0.054	ENSG00000127054|INTS11|chr1|-|A3SS|1319295|1319524|1319295|1319433|1320455|1320529_DN
ENSG00000165671|NSD1|chr5|+|SE|177238236|177238507|177235820|177235945|177239755|177239865	-0.054	ENSG00000165671|NSD1|chr5|+|SE|177238236|177238507|177235820|177235945|177239755|177239865_DN
ENSG00000008710|PKD1|chr16|-|RI|2091780|2092188|2091780|2091906|2092046|2092188	-0.054	ENSG00000008710|PKD1|chr16|-|RI|2091780|2092188|2091780|2091906|2092046|2092188_DN
ENSG00000100239|PPP6R2|chr22|+|A3SS|50439697|50439857|50439700|50439857|50438598|50438762	-0.054	ENSG00000100239|PPP6R2|chr22|+|A3SS|50439697|50439857|50439700|50439857|50438598|50438762_DN
ENSG00000181555|SETD2|chr3|-|SE|47064554|47064630|47062162|47062346|47067069|47067118	-0.054	ENSG00000181555|SETD2|chr3|-|SE|47064554|47064630|47062162|47062346|47067069|47067118_DN
ENSG00000213593|TMX2|chr11|+|SE|57738353|57738430|57737835|57738026|57738663|57738770	-0.054	ENSG00000213593|TMX2|chr11|+|SE|57738353|57738430|57737835|57738026|57738663|57738770_DN
ENSG00000124496|TRERF1|chr6|-|SE|42263319|42263568|42259338|42259723|42264703|42264854	-0.054	ENSG00000124496|TRERF1|chr6|-|SE|42263319|42263568|42259338|42259723|42264703|42264854_DN
ENSG00000132478|UNK|chr17|+|SE|75791759|75792019|75784854|75784984|75792312|75792478	-0.054	ENSG00000132478|UNK|chr17|+|SE|75791759|75792019|75784854|75784984|75792312|75792478_DN
ENSG00000172932|ANKRD13D|chr11|+|RI|67299057|67299611|67299057|67299124|67299529|67299611	-0.053	ENSG00000172932|ANKRD13D|chr11|+|RI|67299057|67299611|67299057|67299124|67299529|67299611_DN
ENSG00000130429|ARPC1B|chr7|+|SE|99377333|99377439|99374706|99374781|99385701|99385778	-0.053	ENSG00000130429|ARPC1B|chr7|+|SE|99377333|99377439|99374706|99374781|99385701|99385778_DN
ENSG00000106397|PLOD3|chr7|-|A5SS|101216162|101216326|101216196|101216326|101215907|101216020	-0.053	ENSG00000106397|PLOD3|chr7|-|A5SS|101216162|101216326|101216196|101216326|101215907|101216020_DN
ENSG00000126457|PRMT1|chr19|+|SE|49679871|49679925|49677271|49677316|49680486|49680588	-0.053	ENSG00000126457|PRMT1|chr19|+|SE|49679871|49679925|49677271|49677316|49680486|49680588_DN
ENSG00000102032|RENBP|chrX|-|SE|153941949|153942031|153941477|153941653|153942854|153943079	-0.053	ENSG00000102032|RENBP|chrX|-|SE|153941949|153942031|153941477|153941653|153942854|153943079_DN
ENSG00000080503|SMARCA2|chr9|+|MXE|2170418|2170472|2181570|2181676|2161685|2161903|2182140|2182242	-0.053	ENSG00000080503|SMARCA2|chr9|+|MXE|2170418|2170472|2181570|2181676|2161685|2161903|2182140|2182242_DN
ENSG00000175274|TP53I11|chr11|-|SE|44939113|44939190|44938206|44938366|44950676|44950752	-0.053	ENSG00000175274|TP53I11|chr11|-|SE|44939113|44939190|44938206|44938366|44950676|44950752_DN
ENSG00000011600|TYROBP|chr19|-|SE|35907729|35907762|35907293|35907580|35908167|35908247	-0.053	ENSG00000011600|TYROBP|chr19|-|SE|35907729|35907762|35907293|35907580|35908167|35908247_DN
ENSG00000196998|WDR45|chrX|-|A3SS|49076644|49076804|49076644|49076750|49077642|49077747	-0.053	ENSG00000196998|WDR45|chrX|-|A3SS|49076644|49076804|49076644|49076750|49077642|49077747_DN
ENSG00000123329|ARHGAP9|chr12|-|SE|57476870|57476963|57476589|57476651|57477155|57477269	-0.052	ENSG00000123329|ARHGAP9|chr12|-|SE|57476870|57476963|57476589|57476651|57477155|57477269_DN
ENSG00000104763|ASAH1|chr8|-|A5SS|18064456|18067298|18067219|18067298|18063184|18063230	-0.052	ENSG00000104763|ASAH1|chr8|-|A5SS|18064456|18067298|18067219|18067298|18063184|18063230_DN
ENSG00000168000|BSCL2|chr11|-|A5SS|62705300|62705617|62705467|62705617|62702467|62702549	-0.052	ENSG00000168000|BSCL2|chr11|-|A5SS|62705300|62705617|62705467|62705617|62702467|62702549_DN
ENSG00000149187|CELF1|chr11|-|A3SS|47478876|47478952|47478876|47478940|47482694|47482856	-0.052	ENSG00000149187|CELF1|chr11|-|A3SS|47478876|47478952|47478876|47478940|47482694|47482856_DN
ENSG00000143207|COP1|chr1|-|SE|176175909|176176007|176163814|176163891|176184632|176184664	-0.052	ENSG00000143207|COP1|chr1|-|SE|176175909|176176007|176163814|176163891|176184632|176184664_DN
ENSG00000067248|DHX29|chr5|-|A3SS|55273292|55273426|55273292|55273377|55274613|55274731	-0.052	ENSG00000067248|DHX29|chr5|-|A3SS|55273292|55273426|55273292|55273377|55274613|55274731_DN
ENSG00000123992|DNPEP|chr2|-|A3SS|219386891|219386980|219386891|219386948|219387069|219387163	-0.052	ENSG00000123992|DNPEP|chr2|-|A3SS|219386891|219386980|219386891|219386948|219387069|219387163_DN
ENSG00000149547|EI24|chr11|+|SE|125581210|125581322|125580092|125580204|125582345|125582420	-0.052	ENSG00000149547|EI24|chr11|+|SE|125581210|125581322|125580092|125580204|125582345|125582420_DN
ENSG00000113068|PFDN1|chr5|-|SE|140300415|140300582|140280959|140281533|140303040|140303083	-0.052	ENSG00000113068|PFDN1|chr5|-|SE|140300415|140300582|140280959|140281533|140303040|140303083_DN
ENSG00000181929|PRKAG1|chr12|-|SE|49016606|49016839|49013061|49013110|49018731|49018807	-0.052	ENSG00000181929|PRKAG1|chr12|-|SE|49016606|49016839|49013061|49013110|49018731|49018807_DN
ENSG00000119707|RBM25|chr14|+|SE|73064971|73065093|73058532|73058705|73071626|73071747	-0.052	ENSG00000119707|RBM25|chr14|+|SE|73064971|73065093|73058532|73058705|73071626|73071747_DN
ENSG00000105698|USF2|chr19|+|SE|35269802|35270003|35269445|35269699|35270446|35270517	-0.052	ENSG00000105698|USF2|chr19|+|SE|35269802|35270003|35269445|35269699|35270446|35270517_DN
ENSG00000161996|WDR90|chr16|+|RI|666454|666792|666454|666598|666672|666792	-0.052	ENSG00000161996|WDR90|chr16|+|RI|666454|666792|666454|666598|666672|666792_DN
ENSG00000168385|SEPTIN2|chr2|+|SE|241317498|241317599|241315943|241315982|241324215|241324241	-0.051	ENSG00000168385|SEPTIN2|chr2|+|SE|241317498|241317599|241315943|241315982|241324215|241324241_DN
ENSG00000196704|AMZ2|chr17|+|SE|68250793|68250967|68249199|68250470|68251049|68251065	-0.051	ENSG00000196704|AMZ2|chr17|+|SE|68250793|68250967|68249199|68250470|68251049|68251065_DN
ENSG00000130429|ARPC1B|chr7|+|SE|99377357|99377439|99374729|99374781|99385701|99385778	-0.051	ENSG00000130429|ARPC1B|chr7|+|SE|99377357|99377439|99374729|99374781|99385701|99385778_DN
ENSG00000064012|CASP8|chr2|+|SE|201272897|201272942|201272637|201272776|201274888|201274953	-0.051	ENSG00000064012|CASP8|chr2|+|SE|201272897|201272942|201272637|201272776|201274888|201274953_DN
ENSG00000088832|FKBP1A|chr20|-|MXE|1375490|1375603|1392833|1392881|1372075|1372240|1392961|1393172	-0.051	ENSG00000088832|FKBP1A|chr20|-|MXE|1375490|1375603|1392833|1392881|1372075|1372240|1392961|1393172_DN
ENSG00000003147|ICA1|chr7|-|SE|8141968|8142055|8141764|8141817|8143874|8143972	-0.051	ENSG00000003147|ICA1|chr7|-|SE|8141968|8142055|8141764|8141817|8143874|8143972_DN
ENSG00000100714|MTHFD1|chr14|+|SE|64458213|64458307|64454722|64454875|64459758|64460004	-0.051	ENSG00000100714|MTHFD1|chr14|+|SE|64458213|64458307|64454722|64454875|64459758|64460004_DN
ENSG00000151883|PARP8|chr5|+|A3SS|50834841|50835015|50834930|50835015|50833978|50834048	-0.051	ENSG00000151883|PARP8|chr5|+|A3SS|50834841|50835015|50834930|50835015|50833978|50834048_DN
ENSG00000044446|PHKA2|chrX|-|SE|18902791|18902910|18901484|18901603|18905757|18905815	-0.051	ENSG00000044446|PHKA2|chrX|-|SE|18902791|18902910|18901484|18901603|18905757|18905815_DN
ENSG00000073921|PICALM|chr11|-|SE|85974707|85974812|85957683|85959060|85981128|85981228	-0.051	ENSG00000073921|PICALM|chr11|-|SE|85974707|85974812|85957683|85959060|85981128|85981228_DN
ENSG00000132155|RAF1|chr3|-|SE|12606200|12606299|12604135|12604289|12608765|12608867	-0.051	ENSG00000132155|RAF1|chr3|-|SE|12606200|12606299|12604135|12604289|12608765|12608867_DN
ENSG00000146083|RNF44|chr5|-|A3SS|176532003|176532193|176532003|176532132|176532365|176532516	-0.051	ENSG00000146083|RNF44|chr5|-|A3SS|176532003|176532193|176532003|176532132|176532365|176532516_DN
ENSG00000117620|SLC35A3|chr1|+|SE|100015301|100015420|100011364|100011533|100022385|100022611	-0.051	ENSG00000117620|SLC35A3|chr1|+|SE|100015301|100015420|100011364|100011533|100022385|100022611_DN
ENSG00000123643|SLC36A1|chr5|+|SE|151452342|151452491|151447626|151447813|151458787|151458935	-0.051	ENSG00000123643|SLC36A1|chr5|+|SE|151452342|151452491|151447626|151447813|151458787|151458935_DN
ENSG00000087206|UIMC1|chr5|-|A5SS|176969596|176969706|176969600|176969706|176968554|176969291	-0.051	ENSG00000087206|UIMC1|chr5|-|A5SS|176969596|176969706|176969600|176969706|176968554|176969291_DN
ENSG00000062716|VMP1|chr17|+|A3SS|59764970|59765138|59765051|59765138|59738836|59738947	-0.051	ENSG00000062716|VMP1|chr17|+|A3SS|59764970|59765138|59765051|59765138|59738836|59738947_DN
ENSG00000101940|WDR13|chrX|+|A3SS|48598716|48598957|48598750|48598957|48597957|48598037	-0.051	ENSG00000101940|WDR13|chrX|+|A3SS|48598716|48598957|48598750|48598957|48597957|48598037_DN
ENSG00000149600|COMMD7|chr20|-|RI|32702702|32704071|32702702|32703458|32704022|32704071	0.051	ENSG00000149600|COMMD7|chr20|-|RI|32702702|32704071|32702702|32703458|32704022|32704071_UP
ENSG00000197021|CXorf40B|chrX|-|SE|149934376|149934573|149934004|149934137|149937432|149937480	0.051	ENSG00000197021|CXorf40B|chrX|-|SE|149934376|149934573|149934004|149934137|149937432|149937480_UP
ENSG00000067596|DHX8|chr17|+|RI|43517166|43520267|43517166|43517322|43520129|43520267	0.051	ENSG00000067596|DHX8|chr17|+|RI|43517166|43520267|43517166|43517322|43520129|43520267_UP
ENSG00000163161|ERCC3|chr2|-|A5SS|127291911|127292846|127292609|127292846|127290223|127290273	0.051	ENSG00000163161|ERCC3|chr2|-|A5SS|127291911|127292846|127292609|127292846|127290223|127290273_UP
ENSG00000031003|FAM13B|chr5|-|SE|137956476|137956542|137954165|137954376|137959615|137959763	0.051	ENSG00000031003|FAM13B|chr5|-|SE|137956476|137956542|137954165|137954376|137959615|137959763_UP
ENSG00000160818|GPATCH4|chr1|-|A3SS|156596080|156596248|156596080|156596131|156596386|156596478	0.051	ENSG00000160818|GPATCH4|chr1|-|A3SS|156596080|156596248|156596080|156596131|156596386|156596478_UP
ENSG00000109065|NAT9|chr17|-|RI|74771959|74772277|74771959|74772039|74772217|74772277	0.051	ENSG00000109065|NAT9|chr17|-|RI|74771959|74772277|74771959|74772039|74772217|74772277_UP
ENSG00000157212|PAXIP1|chr7|-|SE|154986016|154986179|154983218|154983332|154991005|154991069	0.051	ENSG00000157212|PAXIP1|chr7|-|SE|154986016|154986179|154983218|154983332|154991005|154991069_UP
ENSG00000127314|RAP1B|chr12|+|MXE|68654111|68654252|68656305|68656449|68651994|68652051|68657100|68657217	0.051	ENSG00000127314|RAP1B|chr12|+|MXE|68654111|68654252|68656305|68656449|68651994|68652051|68657100|68657217_UP
ENSG00000101782|RIOK3|chr18|+|RI|23477005|23477268|23477005|23477086|23477178|23477268	0.051	ENSG00000101782|RIOK3|chr18|+|RI|23477005|23477268|23477005|23477086|23477178|23477268_UP
ENSG00000006282|SPATA20|chr17|+|SE|50548042|50548161|50547664|50547767|50548282|50548453	0.051	ENSG00000006282|SPATA20|chr17|+|SE|50548042|50548161|50547664|50547767|50548282|50548453_UP
ENSG00000113649|TCERG1|chr5|+|SE|146462017|146462096|146459214|146459337|146463550|146463793	0.051	ENSG00000113649|TCERG1|chr5|+|SE|146462017|146462096|146459214|146459337|146463550|146463793_UP
ENSG00000182885|ADGRG3|chr16|+|SE|57676199|57676338|57673320|57673468|57678169|57678282	0.052	ENSG00000182885|ADGRG3|chr16|+|SE|57676199|57676338|57673320|57673468|57678169|57678282_UP
ENSG00000116459|ATP5PB|chr1|+|SE|111454210|111454356|111449681|111449873|111456085|111456145	0.052	ENSG00000116459|ATP5PB|chr1|+|SE|111454210|111454356|111449681|111449873|111456085|111456145_UP
ENSG00000104043|ATP8B4|chr15|-|SE|50018888|50018976|50010844|50010917|50038767|50038829	0.052	ENSG00000104043|ATP8B4|chr15|-|SE|50018888|50018976|50010844|50010917|50038767|50038829_UP
ENSG00000156983|BRPF1|chr3|+|SE|9733172|9733370|9731787|9732138|9734130|9734441	0.052	ENSG00000156983|BRPF1|chr3|+|SE|9733172|9733370|9731787|9732138|9734130|9734441_UP
ENSG00000215301|DDX3X|chrX|+|RI|41347311|41349886|41347311|41347451|41347639|41349886	0.052	ENSG00000215301|DDX3X|chrX|+|RI|41347311|41349886|41347311|41347451|41347639|41349886_UP
ENSG00000070413|DGCR2|chr22|-|RI|19041057|19041959|19041057|19041294|19041806|19041959	0.052	ENSG00000070413|DGCR2|chr22|-|RI|19041057|19041959|19041057|19041294|19041806|19041959_UP
ENSG00000012061|ERCC1|chr19|-|SE|45413962|45414034|45413433|45413745|45414860|45414960	0.052	ENSG00000012061|ERCC1|chr19|-|SE|45413962|45414034|45413433|45413745|45414860|45414960_UP
ENSG00000136718|IMP4|chr2|+|RI|130345375|130345699|130345375|130345485|130345566|130345699	0.052	ENSG00000136718|IMP4|chr2|+|RI|130345375|130345699|130345375|130345485|130345566|130345699_UP
ENSG00000129347|KRI1|chr19|-|RI|10559358|10559708|10559358|10559529|10559612|10559708	0.052	ENSG00000129347|KRI1|chr19|-|RI|10559358|10559708|10559358|10559529|10559612|10559708_UP
ENSG00000102316|MAGED2|chrX|+|RI|54815247|54816007|54815247|54815690|54815880|54816007	0.052	ENSG00000102316|MAGED2|chrX|+|RI|54815247|54816007|54815247|54815690|54815880|54816007_UP
ENSG00000075413|MARK3|chr14|+|SE|103386040|103386080|103385416|103385697|103405075|103405267	0.052	ENSG00000075413|MARK3|chr14|+|SE|103386040|103386080|103385416|103385697|103405075|103405267_UP
ENSG00000090674|MCOLN1|chr19|+|SE|7527519|7527628|7526760|7526926|7527863|7527960	0.052	ENSG00000090674|MCOLN1|chr19|+|SE|7527519|7527628|7526760|7526926|7527863|7527960_UP
ENSG00000172936|MYD88|chr3|+|A5SS|38140387|38140592|38140387|38140568|38140756|38140848	0.052	ENSG00000172936|MYD88|chr3|+|A5SS|38140387|38140592|38140387|38140568|38140756|38140848_UP
ENSG00000114021|NIT2|chr3|+|RI|100345584|100346255|100345584|100345678|100346180|100346255	0.052	ENSG00000114021|NIT2|chr3|+|RI|100345584|100346255|100345584|100345678|100346180|100346255_UP
ENSG00000185624|P4HB|chr17|-|A5SS|81859178|81859387|81859180|81859387|81855141|81855279	0.052	ENSG00000185624|P4HB|chr17|-|A5SS|81859178|81859387|81859180|81859387|81855141|81855279_UP
ENSG00000105122|RASAL3|chr19|-|RI|15457291|15458426|15457291|15457834|15458327|15458426	0.052	ENSG00000105122|RASAL3|chr19|-|RI|15457291|15458426|15457291|15457834|15458327|15458426_UP
ENSG00000111011|RSRC2|chr12|-|A5SS|122521295|122521428|122521384|122521428|122518838|122519029	0.052	ENSG00000111011|RSRC2|chr12|-|A5SS|122521295|122521428|122521384|122521428|122518838|122519029_UP
ENSG00000164054|SHISA5|chr3|-|RI|48467875|48469573|48467875|48468217|48469360|48469573	0.052	ENSG00000164054|SHISA5|chr3|-|RI|48467875|48469573|48467875|48468217|48469360|48469573_UP
ENSG00000109332|UBE2D3|chr4|-|A3SS|102809067|102809184|102809067|102809159|102809671|102809703	0.052	ENSG00000109332|UBE2D3|chr4|-|A3SS|102809067|102809184|102809067|102809159|102809671|102809703_UP
ENSG00000102226|USP11|chrX|+|RI|47239350|47239907|47239350|47239481|47239789|47239907	0.052	ENSG00000102226|USP11|chrX|+|RI|47239350|47239907|47239350|47239481|47239789|47239907_UP
ENSG00000112715|VEGFA|chr6|+|SE|43781955|43782052|43778888|43778918|43784540|43784546	0.052	ENSG00000112715|VEGFA|chr6|+|SE|43781955|43782052|43778888|43778918|43784540|43784546_UP
ENSG00000086666|ZFAND6|chr15|+|A3SS|80121711|80121820|80121747|80121820|80120327|80120498	0.052	ENSG00000086666|ZFAND6|chr15|+|A3SS|80121711|80121820|80121747|80121820|80120327|80120498_UP
ENSG00000123908|AGO2|chr8|-|SE|140535467|140535569|140532415|140532615|140539319|140539454	0.053	ENSG00000123908|AGO2|chr8|-|SE|140535467|140535569|140532415|140532615|140539319|140539454_UP
ENSG00000135049|AGTPBP1|chr9|-|SE|85660935|85660973|85657434|85657643|85669484|85669578	0.053	ENSG00000135049|AGTPBP1|chr9|-|SE|85660935|85660973|85657434|85657643|85669484|85669578_UP
ENSG00000160117|ANKLE1|chr19|+|SE|17285680|17285819|17285430|17285590|17286379|17286505	0.053	ENSG00000160117|ANKLE1|chr19|+|SE|17285680|17285819|17285430|17285590|17286379|17286505_UP
ENSG00000088448|ANKRD10|chr13|-|SE|110900529|110900661|110892956|110893263|110906032|110906124	0.053	ENSG00000088448|ANKRD10|chr13|-|SE|110900529|110900661|110892956|110893263|110906032|110906124_UP
ENSG00000102901|CENPT|chr16|-|RI|67829764|67831358|67829764|67830548|67831215|67831358	0.053	ENSG00000102901|CENPT|chr16|-|RI|67829764|67831358|67829764|67830548|67831215|67831358_UP
ENSG00000170271|FAXDC2|chr5|-|SE|154830800|154830922|154823307|154823592|154834842|154835088	0.053	ENSG00000170271|FAXDC2|chr5|-|SE|154830800|154830922|154823307|154823592|154834842|154835088_UP
ENSG00000234741|GAS5|chr1|-|SE|173864483|173864506|173863901|173864304|173864674|173864704	0.053	ENSG00000234741|GAS5|chr1|-|SE|173864483|173864506|173863901|173864304|173864674|173864704_UP
ENSG00000153187|HNRNPU|chr1|-|RI|244860334|244862534|244860334|244860474|244862460|244862534	0.053	ENSG00000153187|HNRNPU|chr1|-|RI|244860334|244862534|244860334|244860474|244862460|244862534_UP
ENSG00000077238|IL4R|chr16|+|SE|27346466|27346618|27344868|27345020|27352539|27352696	0.053	ENSG00000077238|IL4R|chr16|+|SE|27346466|27346618|27344868|27345020|27352539|27352696_UP
ENSG00000125347|IRF1|chr5|-|SE|132486250|132486373|132485666|132485716|132486556|132486686	0.053	ENSG00000125347|IRF1|chr5|-|SE|132486250|132486373|132485666|132485716|132486556|132486686_UP
ENSG00000070495|JMJD6|chr17|-|SE|76721262|76721356|76720359|76720498|76721797|76721933	0.053	ENSG00000070495|JMJD6|chr17|-|SE|76721262|76721356|76720359|76720498|76721797|76721933_UP
ENSG00000213533|STIMATE|chr3|-|SE|52895877|52895955|52855395|52855444|52897290|52897543	0.053	ENSG00000213533|STIMATE|chr3|-|SE|52895877|52895955|52855395|52855444|52897290|52897543_UP
ENSG00000168883|USP39|chr2|+|RI|85648760|85649280|85648760|85648853|85649016|85649280	0.053	ENSG00000168883|USP39|chr2|+|RI|85648760|85649280|85648760|85648853|85649016|85649280_UP
ENSG00000160710|ADAR|chr1|-|RI|154588124|154588673|154588124|154588258|154588550|154588673	0.054	ENSG00000160710|ADAR|chr1|-|RI|154588124|154588673|154588124|154588258|154588550|154588673_UP
ENSG00000172775|FAM192A|chr16|-|SE|57175538|57175590|57173727|57173869|57185820|57186032	0.054	ENSG00000172775|FAM192A|chr16|-|SE|57175538|57175590|57173727|57173869|57185820|57186032_UP
ENSG00000171988|JMJD1C|chr10|-|SE|63200475|63200677|63198512|63198727|63206594|63208801	0.054	ENSG00000171988|JMJD1C|chr10|-|SE|63200475|63200677|63198512|63198727|63206594|63208801_UP
ENSG00000122203|KIAA1191|chr5|-|SE|176359810|176359918|176359461|176359567|176361601|176361735	0.054	ENSG00000122203|KIAA1191|chr5|-|SE|176359810|176359918|176359461|176359567|176361601|176361735_UP
ENSG00000101460|MAP1LC3A|chr20|+|SE|34559207|34559263|34558107|34558908|34559346|34559453	0.054	ENSG00000101460|MAP1LC3A|chr20|+|SE|34559207|34559263|34558107|34558908|34559346|34559453_UP
ENSG00000144401|METTL21A|chr2|-|SE|207620640|207620694|207612722|207613443|207621805|207621917	0.054	ENSG00000144401|METTL21A|chr2|-|SE|207620640|207620694|207612722|207613443|207621805|207621917_UP
ENSG00000139428|MMAB|chr12|-|A3SS|109561039|109561329|109561039|109561104|109561419|109561517	0.054	ENSG00000139428|MMAB|chr12|-|A3SS|109561039|109561329|109561039|109561104|109561419|109561517_UP
ENSG00000118113|MMP8|chr11|-|SE|102714555|102714709|102713753|102713857|102715303|102715437	0.054	ENSG00000118113|MMP8|chr11|-|SE|102714555|102714709|102713753|102713857|102715303|102715437_UP
ENSG00000166902|MRPL16|chr11|-|SE|59808732|59808872|59807235|59807849|59809854|59810022	0.054	ENSG00000166902|MRPL16|chr11|-|SE|59808732|59808872|59807235|59807849|59809854|59810022_UP
ENSG00000146918|NCAPG2|chr7|-|RI|158655117|158655455|158655117|158655258|158655338|158655455	0.054	ENSG00000146918|NCAPG2|chr7|-|RI|158655117|158655455|158655117|158655258|158655338|158655455_UP
ENSG00000101346|POFUT1|chr20|+|SE|32210070|32210192|32207879|32208065|32215268|32215451	0.054	ENSG00000101346|POFUT1|chr20|+|SE|32210070|32210192|32207879|32208065|32215268|32215451_UP
ENSG00000197249|SERPINA1|chr14|-|SE|94388559|94388663|94382591|94383241|94390419|94390614	0.054	ENSG00000197249|SERPINA1|chr14|-|SE|94388559|94388663|94382591|94383241|94390419|94390614_UP
ENSG00000135451|TROAP|chr12|+|RI|49330144|49331407|49330144|49330943|49331213|49331407	0.054	ENSG00000135451|TROAP|chr12|+|RI|49330144|49331407|49330144|49330943|49331213|49331407_UP
ENSG00000162191|UBXN1|chr11|-|RI|62676497|62677005|62676497|62676639|62676812|62677005	0.054	ENSG00000162191|UBXN1|chr11|-|RI|62676497|62677005|62676497|62676639|62676812|62677005_UP
ENSG00000177646|ACAD9|chr3|+|RI|128909343|128910149|128909343|128909421|128910020|128910149	0.055	ENSG00000177646|ACAD9|chr3|+|RI|128909343|128910149|128909343|128909421|128910020|128910149_UP
ENSG00000065357|DGKA|chr12|+|SE|55941509|55941584|55940896|55941325|55941997|55942037	0.055	ENSG00000065357|DGKA|chr12|+|SE|55941509|55941584|55940896|55941325|55941997|55942037_UP
ENSG00000167792|NDUFV1|chr11|+|A5SS|67606957|67607324|67606957|67607076|67608395|67608478	0.055	ENSG00000167792|NDUFV1|chr11|+|A5SS|67606957|67607324|67606957|67607076|67608395|67608478_UP
ENSG00000196923|PDLIM7|chr5|-|SE|177489770|177490031|177489392|177489627|177490869|177490906	0.055	ENSG00000196923|PDLIM7|chr5|-|SE|177489770|177490031|177489392|177489627|177490869|177490906_UP
ENSG00000092020|PPP2R3C|chr14|-|SE|35095047|35095184|35091069|35091207|35096557|35096633	0.055	ENSG00000092020|PPP2R3C|chr14|-|SE|35095047|35095184|35091069|35091207|35096557|35096633_UP
ENSG00000111725|PRKAB1|chr12|+|SE|119671494|119671668|119668149|119668403|119672300|119672427	0.055	ENSG00000111725|PRKAB1|chr12|+|SE|119671494|119671668|119668149|119668403|119672300|119672427_UP
ENSG00000112130|RNF8|chr6|+|SE|37359182|37359342|37353978|37354275|37360445|37360574	0.055	ENSG00000112130|RNF8|chr6|+|SE|37359182|37359342|37353978|37354275|37360445|37360574_UP
ENSG00000107290|SETX|chr9|-|SE|132266126|132266249|132261355|132264985|132269614|132269702	0.055	ENSG00000107290|SETX|chr9|-|SE|132266126|132266249|132261355|132264985|132269614|132269702_UP
ENSG00000157216|SSBP3|chr1|-|MXE|54257126|54257186|54258068|54258149|54251793|54251860|54281437|54281527	0.055	ENSG00000157216|SSBP3|chr1|-|MXE|54257126|54257186|54258068|54258149|54251793|54251860|54281437|54281527_UP
ENSG00000136738|STAM|chr10|+|SE|17672974|17673078|17660463|17660548|17684674|17684750	0.055	ENSG00000136738|STAM|chr10|+|SE|17672974|17673078|17660463|17660548|17684674|17684750_UP
ENSG00000067167|TRAM1|chr8|-|SE|70598133|70598255|70597890|70598011|70600018|70600082	0.055	ENSG00000067167|TRAM1|chr8|-|SE|70598133|70598255|70597890|70598011|70600018|70600082_UP
ENSG00000128815|WDFY4|chr10|+|RI|48966525|48969248|48966525|48966673|48969063|48969248	0.055	ENSG00000128815|WDFY4|chr10|+|RI|48966525|48969248|48966525|48966673|48969063|48969248_UP
ENSG00000214655|ZSWIM8|chr10|+|RI|73794146|73794639|73794146|73794330|73794555|73794639	0.055	ENSG00000214655|ZSWIM8|chr10|+|RI|73794146|73794639|73794146|73794330|73794555|73794639_UP
ENSG00000088448|ANKRD10|chr13|-|SE|110900529|110900694|110893196|110893263|110906032|110906124	0.056	ENSG00000088448|ANKRD10|chr13|-|SE|110900529|110900694|110893196|110893263|110906032|110906124_UP
ENSG00000114744|COMMD2|chr3|-|SE|149750256|149750382|149741389|149741718|149750677|149750851	0.056	ENSG00000114744|COMMD2|chr3|-|SE|149750256|149750382|149741389|149741718|149750677|149750851_UP
ENSG00000169738|DCXR|chr17|-|RI|82036190|82036643|82036190|82036448|82036543|82036643	0.056	ENSG00000169738|DCXR|chr17|-|RI|82036190|82036643|82036190|82036448|82036543|82036643_UP
ENSG00000072849|DERL2|chr17|-|SE|5481295|5481389|5480386|5480582|5482808|5482879	0.056	ENSG00000072849|DERL2|chr17|-|SE|5481295|5481389|5480386|5480582|5482808|5482879_UP
ENSG00000163913|IFT122|chr3|+|SE|129456113|129456264|129451913|129451998|129458598|129458677	0.056	ENSG00000163913|IFT122|chr3|+|SE|129456113|129456264|129451913|129451998|129458598|129458677_UP
ENSG00000143621|ILF2|chr1|-|RI|153663018|153663276|153663018|153663133|153663214|153663276	0.056	ENSG00000143621|ILF2|chr1|-|RI|153663018|153663276|153663018|153663133|153663214|153663276_UP
ENSG00000178035|IMPDH2|chr3|-|RI|49028430|49028806|49028430|49028532|49028757|49028806	0.056	ENSG00000178035|IMPDH2|chr3|-|RI|49028430|49028806|49028430|49028532|49028757|49028806_UP
ENSG00000166508|MCM7|chr7|-|RI|100099022|100099403|100099022|100099203|100099278|100099403	0.056	ENSG00000166508|MCM7|chr7|-|RI|100099022|100099403|100099022|100099203|100099278|100099403_UP
ENSG00000130830|MPP1|chrX|-|SE|154789953|154790022|154786203|154786400|154805271|154805485	0.056	ENSG00000130830|MPP1|chrX|-|SE|154789953|154790022|154786203|154786400|154805271|154805485_UP
ENSG00000133030|MPRIP|chr17|+|SE|17180606|17180669|17180002|17180088|17184822|17185560	0.056	ENSG00000133030|MPRIP|chr17|+|SE|17180606|17180669|17180002|17180088|17184822|17185560_UP
ENSG00000070081|NUCB2|chr11|+|SE|17291239|17291365|17282788|17282943|17295323|17295441	0.056	ENSG00000070081|NUCB2|chr11|+|SE|17291239|17291365|17282788|17282943|17295323|17295441_UP
ENSG00000154839|SKA1|chr18|+|SE|50380125|50380250|50375819|50375918|50382128|50382226	0.056	ENSG00000154839|SKA1|chr18|+|SE|50380125|50380250|50375819|50375918|50382128|50382226_UP
ENSG00000149476|TKFC|chr11|+|RI|61342460|61342658|61342460|61342495|61342573|61342658	0.056	ENSG00000149476|TKFC|chr11|+|RI|61342460|61342658|61342460|61342495|61342573|61342658_UP
ENSG00000213593|TMX2|chr11|+|SE|57737912|57738026|57737607|57737668|57738353|57738430	0.056	ENSG00000213593|TMX2|chr11|+|SE|57737912|57738026|57737607|57737668|57738353|57738430_UP
ENSG00000154370|TRIM11|chr1|-|SE|228400963|228401194|228397142|228397165|228402065|228402161	0.056	ENSG00000154370|TRIM11|chr1|-|SE|228400963|228401194|228397142|228397165|228402065|228402161_UP
ENSG00000064201|TSPAN32|chr11|+|RI|2316228|2316667|2316228|2316312|2316575|2316667	0.056	ENSG00000064201|TSPAN32|chr11|+|RI|2316228|2316667|2316228|2316312|2316575|2316667_UP
ENSG00000166913|YWHAB|chr20|+|RI|44904967|44906096|44904967|44905131|44906000|44906096	0.056	ENSG00000166913|YWHAB|chr20|+|RI|44904967|44906096|44904967|44905131|44906000|44906096_UP
ENSG00000074370|ATP2A3|chr17|-|SE|3927980|3928038|3925290|3925441|3928239|3928327	0.057	ENSG00000074370|ATP2A3|chr17|-|SE|3927980|3928038|3925290|3925441|3928239|3928327_UP
ENSG00000099968|BCL2L13|chr22|+|SE|17696140|17696210|17688985|17689142|17702242|17702386	0.057	ENSG00000099968|BCL2L13|chr22|+|SE|17696140|17696210|17688985|17689142|17702242|17702386_UP
ENSG00000128191|DGCR8|chr22|+|SE|20092808|20092907|20091868|20091970|20094712|20094795	0.057	ENSG00000128191|DGCR8|chr22|+|SE|20092808|20092907|20091868|20091970|20094712|20094795_UP
ENSG00000051108|HERPUD1|chr16|+|SE|56935400|56935475|56935234|56935312|56936686|56936817	0.057	ENSG00000051108|HERPUD1|chr16|+|SE|56935400|56935475|56935234|56935312|56936686|56936817_UP
ENSG00000149269|PAK1|chr11|-|SE|77397026|77397158|77392330|77392541|77411773|77411933	0.057	ENSG00000149269|PAK1|chr11|-|SE|77397026|77397158|77392330|77392541|77411773|77411933_UP
ENSG00000140694|PARN|chr16|-|SE|14617589|14617650|14610643|14610809|14627105|14627136	0.057	ENSG00000140694|PARN|chr16|-|SE|14617589|14617650|14610643|14610809|14627105|14627136_UP
ENSG00000143224|PPOX|chr1|+|RI|161170906|161171181|161170906|161170949|161171033|161171181	0.057	ENSG00000143224|PPOX|chr1|+|RI|161170906|161171181|161170906|161170949|161171033|161171181_UP
ENSG00000131238|PPT1|chr1|-|SE|40076729|40076913|40072718|40074183|40078559|40078658	0.057	ENSG00000131238|PPT1|chr1|-|SE|40076729|40076913|40072718|40074183|40078559|40078658_UP
ENSG00000107560|RAB11FIP2|chr10|-|SE|118033981|118034041|118015064|118015110|118038971|118039440	0.057	ENSG00000107560|RAB11FIP2|chr10|-|SE|118033981|118034041|118015064|118015110|118038971|118039440_UP
ENSG00000214022|REPIN1|chr7|+|SE|150370759|150370884|150369670|150369868|150371227|150371803	0.057	ENSG00000214022|REPIN1|chr7|+|SE|150370759|150370884|150369670|150369868|150371227|150371803_UP
ENSG00000065613|SLK|chr10|+|SE|104010815|104010908|104008176|104008356|104018159|104018289	0.057	ENSG00000065613|SLK|chr10|+|SE|104010815|104010908|104008176|104008356|104018159|104018289_UP
ENSG00000130511|SSBP4|chr19|+|A5SS|18433709|18433932|18433709|18433817|18434216|18434562	0.057	ENSG00000130511|SSBP4|chr19|+|A5SS|18433709|18433932|18433709|18433817|18434216|18434562_UP
ENSG00000148248|SURF4|chr9|-|A3SS|133367258|133367543|133367258|133367445|133375921|133376166	0.057	ENSG00000148248|SURF4|chr9|-|A3SS|133367258|133367543|133367258|133367445|133375921|133376166_UP
ENSG00000169762|TAPT1|chr4|-|SE|16196657|16196723|16191360|16191523|16202461|16202582	0.057	ENSG00000169762|TAPT1|chr4|-|SE|16196657|16196723|16191360|16191523|16202461|16202582_UP
ENSG00000064201|TSPAN32|chr11|+|SE|2317426|2317525|2316635|2316667|2317862|2318142	0.057	ENSG00000064201|TSPAN32|chr11|+|SE|2317426|2317525|2316635|2316667|2317862|2318142_UP
ENSG00000214063|TSPAN4|chr11|+|A5SS|862549|864352|862549|862741|864436|864511	0.057	ENSG00000214063|TSPAN4|chr11|+|A5SS|862549|864352|862549|862741|864436|864511_UP
ENSG00000156802|ATAD2|chr8|-|A5SS|123348182|123348273|123348186|123348273|123347091|123347406	0.058	ENSG00000156802|ATAD2|chr8|-|A5SS|123348182|123348273|123348186|123348273|123347091|123347406_UP
ENSG00000104043|ATP8B4|chr15|-|SE|49922223|49922405|49920273|49920410|49923378|49923494	0.058	ENSG00000104043|ATP8B4|chr15|-|SE|49922223|49922405|49920273|49920410|49923378|49923494_UP
ENSG00000102901|CENPT|chr16|-|A3SS|67832227|67832354|67832227|67832315|67832454|67832545	0.058	ENSG00000102901|CENPT|chr16|-|A3SS|67832227|67832354|67832227|67832315|67832454|67832545_UP
ENSG00000071894|CPSF1|chr8|-|RI|144400165|144400493|144400165|144400276|144400353|144400493	0.058	ENSG00000071894|CPSF1|chr8|-|RI|144400165|144400493|144400165|144400276|144400353|144400493_UP
ENSG00000101138|CSTF1|chr20|+|A5SS|56395520|56395759|56395520|56395721|56397206|56397484	0.058	ENSG00000101138|CSTF1|chr20|+|A5SS|56395520|56395759|56395520|56395721|56397206|56397484_UP
ENSG00000095059|DHPS|chr19|-|RI|12679456|12679719|12679456|12679543|12679622|12679719	0.058	ENSG00000095059|DHPS|chr19|-|RI|12679456|12679719|12679456|12679543|12679622|12679719_UP
ENSG00000038358|EDC4|chr16|+|SE|67875737|67875837|67873051|67873343|67875944|67876101	0.058	ENSG00000038358|EDC4|chr16|+|SE|67875737|67875837|67873051|67873343|67875944|67876101_UP
ENSG00000082074|FYB1|chr5|-|SE|39212677|39213017|39202773|39202987|39219442|39219563	0.058	ENSG00000082074|FYB1|chr5|-|SE|39212677|39213017|39202773|39202987|39219442|39219563_UP
ENSG00000143774|GUK1|chr1|+|SE|228148370|228148456|228147465|228147699|228148664|228148691	0.058	ENSG00000143774|GUK1|chr1|+|SE|228148370|228148456|228147465|228147699|228148664|228148691_UP
ENSG00000184216|IRAK1|chrX|-|MXE|154014041|154014278|154016031|154016097|154013042|154013433|154016436|154016644	0.058	ENSG00000184216|IRAK1|chrX|-|MXE|154014041|154014278|154016031|154016097|154013042|154013433|154016436|154016644_UP
ENSG00000005961|ITGA2B|chr17|-|RI|44380599|44381061|44380599|44380645|44380878|44381061	0.058	ENSG00000005961|ITGA2B|chr17|-|RI|44380599|44381061|44380599|44380645|44380878|44381061_UP
ENSG00000050130|JKAMP|chr14|+|SE|59501190|59501267|59498726|59498908|59503853|59504274	0.058	ENSG00000050130|JKAMP|chr14|+|SE|59501190|59501267|59498726|59498908|59503853|59504274_UP
ENSG00000139636|LMBR1L|chr12|-|SE|49106653|49106746|49105923|49105957|49106960|49107045	0.058	ENSG00000139636|LMBR1L|chr12|-|SE|49106653|49106746|49105923|49105957|49106960|49107045_UP
ENSG00000179222|MAGED1|chrX|+|RI|51901552|51902354|51901552|51901938|51902145|51902354	0.058	ENSG00000179222|MAGED1|chrX|+|RI|51901552|51902354|51901552|51901938|51902145|51902354_UP
ENSG00000135124|P2RX4|chr12|+|RI|121232610|121233092|121232610|121232676|121232996|121233092	0.058	ENSG00000135124|P2RX4|chr12|+|RI|121232610|121233092|121232610|121232676|121232996|121233092_UP
ENSG00000186184|POLR1D|chr13|+|SE|27650041|27650241|27648378|27648453|27665685|27667410	0.058	ENSG00000186184|POLR1D|chr13|+|SE|27650041|27650241|27648378|27648453|27665685|27667410_UP
ENSG00000100911|PSME2|chr14|-|RI|24145709|24146240|24145709|24145772|24146207|24146240	0.058	ENSG00000100911|PSME2|chr14|-|RI|24145709|24146240|24145709|24145772|24146207|24146240_UP
ENSG00000120725|SIL1|chr5|-|SE|139196440|139196528|139127738|139127853|139198268|139198297	0.058	ENSG00000120725|SIL1|chr5|-|SE|139196440|139196528|139127738|139127853|139198268|139198297_UP
ENSG00000203875|SNHG5|chr6|-|A5SS|85677794|85678032|85677953|85678032|85677423|85677492	0.058	ENSG00000203875|SNHG5|chr6|-|A5SS|85677794|85678032|85677953|85678032|85677423|85677492_UP
ENSG00000165209|STRBP|chr9|-|SE|123168188|123168258|123160976|123161068|123169901|123170046	0.058	ENSG00000165209|STRBP|chr9|-|SE|123168188|123168258|123160976|123161068|123169901|123170046_UP
ENSG00000118900|UBN1|chr16|+|SE|4877384|4877474|4876870|4877111|4880082|4880445	0.058	ENSG00000118900|UBN1|chr16|+|SE|4877384|4877474|4876870|4877111|4880082|4880445_UP
ENSG00000074755|ZZEF1|chr17|-|SE|4056215|4056345|4054056|4054195|4057993|4058155	0.058	ENSG00000074755|ZZEF1|chr17|-|SE|4056215|4056345|4054056|4054195|4057993|4058155_UP
ENSG00000115307|AUP1|chr2|-|RI|74526940|74527363|74526940|74527121|74527247|74527363	0.059	ENSG00000115307|AUP1|chr2|-|RI|74526940|74527363|74526940|74527121|74527247|74527363_UP
ENSG00000137720|C11orf1|chr11|+|SE|111883135|111883202|111882367|111882598|111883770|111883805	0.059	ENSG00000137720|C11orf1|chr11|+|SE|111883135|111883202|111882367|111882598|111883770|111883805_UP
ENSG00000133742|CA1|chr8|-|SE|85342748|85342825|85341598|85341659|85378045|85378113	0.059	ENSG00000133742|CA1|chr8|-|SE|85342748|85342825|85341598|85341659|85378045|85378113_UP
ENSG00000169738|DCXR|chr17|-|RI|82036858|82037547|82036858|82037013|82037449|82037547	0.059	ENSG00000169738|DCXR|chr17|-|RI|82036858|82037547|82036858|82037013|82037449|82037547_UP
ENSG00000198563|DDX39B|chr6|-|RI|31532779|31535485|31532779|31532911|31535366|31535485	0.059	ENSG00000198563|DDX39B|chr6|-|RI|31532779|31535485|31532779|31532911|31535366|31535485_UP
ENSG00000071889|FAM3A|chrX|-|SE|154507810|154507861|154507405|154507490|154508288|154508347	0.059	ENSG00000071889|FAM3A|chrX|-|SE|154507810|154507861|154507405|154507490|154508288|154508347_UP
ENSG00000130244|FAM98C|chr19|+|RI|38405518|38407077|38405518|38405635|38406909|38407077	0.059	ENSG00000130244|FAM98C|chr19|+|RI|38405518|38407077|38405518|38405635|38406909|38407077_UP
ENSG00000148343|MIGA2|chr9|+|A3SS|129068018|129068332|129068197|129068332|129067772|129067871	0.059	ENSG00000148343|MIGA2|chr9|+|A3SS|129068018|129068332|129068197|129068332|129067772|129067871_UP
ENSG00000172732|MUS81|chr11|+|RI|65865810|65866439|65865810|65865894|65865985|65866439	0.059	ENSG00000172732|MUS81|chr11|+|RI|65865810|65866439|65865810|65865894|65865985|65866439_UP
ENSG00000188672|RHCE|chr1|-|MXE|25375348|25375428|25385710|25385844|25370466|25370540|25388975|25389113	0.059	ENSG00000188672|RHCE|chr1|-|MXE|25375348|25375428|25385710|25385844|25370466|25370540|25388975|25389113_UP
ENSG00000022840|RNF10|chr12|+|SE|120574467|120574537|120566952|120566980|120575630|120575688	0.059	ENSG00000022840|RNF10|chr12|+|SE|120574467|120574537|120566952|120566980|120575630|120575688_UP
ENSG00000117616|RSRP1|chr1|-|A3SS|25243549|25244224|25243549|25243633|25244453|25244498	0.059	ENSG00000117616|RSRP1|chr1|-|A3SS|25243549|25244224|25243549|25243633|25244453|25244498_UP
ENSG00000138674|SEC31A|chr4|-|SE|82861630|82861708|82857688|82857764|82862533|82862572	0.059	ENSG00000138674|SEC31A|chr4|-|SE|82861630|82861708|82857688|82857764|82862533|82862572_UP
ENSG00000204351|SKIV2L|chr6|+|RI|31969279|31969751|31969279|31969420|31969514|31969751	0.059	ENSG00000204351|SKIV2L|chr6|+|RI|31969279|31969751|31969279|31969420|31969514|31969751_UP
ENSG00000180098|TRNAU1AP|chr1|+|SE|28561112|28561260|28560632|28560732|28561345|28561398	0.059	ENSG00000180098|TRNAU1AP|chr1|+|SE|28561112|28561260|28560632|28560732|28561345|28561398_UP
ENSG00000006534|ALDH3B1|chr11|+|A5SS|68015296|68018637|68015296|68015459|68018772|68018893	0.06	ENSG00000006534|ALDH3B1|chr11|+|A5SS|68015296|68018637|68015296|68015459|68018772|68018893_UP
ENSG00000164053|ATRIP|chr3|+|SE|48461360|48461445|48460708|48460799|48463744|48463881	0.06	ENSG00000164053|ATRIP|chr3|+|SE|48461360|48461445|48460708|48460799|48463744|48463881_UP
ENSG00000102901|CENPT|chr16|-|RI|67832227|67832545|67832227|67832315|67832454|67832545	0.06	ENSG00000102901|CENPT|chr16|-|RI|67832227|67832545|67832227|67832315|67832454|67832545_UP
ENSG00000108406|DHX40|chr17|+|SE|59566626|59566709|59565610|59565783|59570517|59570663	0.06	ENSG00000108406|DHX40|chr17|+|SE|59566626|59566709|59565610|59565783|59570517|59570663_UP
ENSG00000182511|FES|chr15|+|A5SS|90885036|90885585|90885036|90885258|90886960|90887057	0.06	ENSG00000182511|FES|chr15|+|A5SS|90885036|90885585|90885036|90885258|90886960|90887057_UP
ENSG00000082701|GSK3B|chr3|-|SE|119866589|119866628|119863418|119863605|119876412|119876508	0.06	ENSG00000082701|GSK3B|chr3|-|SE|119866589|119866628|119863418|119863605|119876412|119876508_UP
ENSG00000178922|HYI|chr1|-|A5SS|43453385|43453497|43453412|43453497|43452204|43452319	0.06	ENSG00000178922|HYI|chr1|-|A5SS|43453385|43453497|43453412|43453497|43452204|43452319_UP
ENSG00000127603|MACF1|chr1|+|RI|39484600|39486987|39484600|39484730|39485537|39486987	0.06	ENSG00000127603|MACF1|chr1|+|RI|39484600|39486987|39484600|39484730|39485537|39486987_UP
ENSG00000079277|MKNK1|chr1|-|SE|46585873|46585974|46583227|46583329|46594112|46594206	0.06	ENSG00000079277|MKNK1|chr1|-|SE|46585873|46585974|46583227|46583329|46594112|46594206_UP
ENSG00000109180|OCIAD1|chr4|+|A5SS|48831083|48831496|48831083|48831249|48832619|48832682	0.06	ENSG00000109180|OCIAD1|chr4|+|A5SS|48831083|48831496|48831083|48831249|48832619|48832682_UP
ENSG00000163939|PBRM1|chr3|-|SE|52624896|52624941|52617261|52617538|52627272|52627370	0.06	ENSG00000163939|PBRM1|chr3|-|SE|52624896|52624941|52617261|52617538|52627272|52627370_UP
ENSG00000185379|RAD51D|chr17|-|SE|35116858|35117037|35107365|35107447|35118500|35118619	0.06	ENSG00000185379|RAD51D|chr17|-|SE|35116858|35117037|35107365|35107447|35118500|35118619_UP
ENSG00000006015|REX1BD|chr19|+|RI|18588994|18589683|18588994|18589077|18589478|18589683	0.06	ENSG00000006015|REX1BD|chr19|+|RI|18588994|18589683|18588994|18589077|18589478|18589683_UP
ENSG00000161526|SAP30BP|chr17|+|RI|75705610|75706092|75705610|75705693|75706007|75706092	0.06	ENSG00000161526|SAP30BP|chr17|+|RI|75705610|75706092|75705610|75705693|75706007|75706092_UP
ENSG00000087266|SH3BP2|chr4|+|SE|2823394|2823569|2822934|2823037|2824612|2824730	0.06	ENSG00000087266|SH3BP2|chr4|+|SE|2823394|2823569|2822934|2823037|2824612|2824730_UP
ENSG00000185187|SIGIRR|chr11|-|SE|406842|406993|405871|406538|407061|407164	0.06	ENSG00000185187|SIGIRR|chr11|-|SE|406842|406993|405871|406538|407061|407164_UP
ENSG00000158552|ZFAND2B|chr2|+|SE|219207647|219207774|219207326|219207421|219207886|219208003	0.06	ENSG00000158552|ZFAND2B|chr2|+|SE|219207647|219207774|219207326|219207421|219207886|219208003_UP
ENSG00000162300|ZFPL1|chr11|+|A5SS|65085114|65085314|65085114|65085226|65086414|65086608	0.06	ENSG00000162300|ZFPL1|chr11|+|A5SS|65085114|65085314|65085114|65085226|65086414|65086608_UP
ENSG00000170776|AKAP13|chr15|+|SE|85662387|85662453|85658536|85658590|85664562|85664755	0.061	ENSG00000170776|AKAP13|chr15|+|SE|85662387|85662453|85658536|85658590|85664562|85664755_UP
ENSG00000132254|ARFIP2|chr11|-|A3SS|6479139|6479357|6479139|6479258|6479971|6480068	0.061	ENSG00000132254|ARFIP2|chr11|-|A3SS|6479139|6479357|6479139|6479258|6479971|6480068_UP
ENSG00000166946|CCNDBP1|chr15|+|A5SS|43185819|43186233|43185819|43185879|43189198|43189280	0.061	ENSG00000166946|CCNDBP1|chr15|+|A5SS|43185819|43186233|43185819|43185879|43189198|43189280_UP
ENSG00000159176|CSRP1|chr1|-|RI|201485282|201488984|201485282|201485376|201488854|201488984	0.061	ENSG00000159176|CSRP1|chr1|-|RI|201485282|201488984|201485282|201485376|201488854|201488984_UP
ENSG00000215301|DDX3X|chrX|+|RI|41346858|41347451|41346858|41347012|41347311|41347451	0.061	ENSG00000215301|DDX3X|chrX|+|RI|41346858|41347451|41346858|41347012|41347311|41347451_UP
ENSG00000117543|DPH5|chr1|-|SE|101025308|101025466|101021640|101021765|101025682|101025753	0.061	ENSG00000117543|DPH5|chr1|-|SE|101025308|101025466|101021640|101021765|101025682|101025753_UP
ENSG00000187239|FNBP1|chr9|-|SE|129923843|129923996|129908889|129908999|129924959|129925157	0.061	ENSG00000187239|FNBP1|chr9|-|SE|129923843|129923996|129908889|129908999|129924959|129925157_UP
ENSG00000125772|GPCPD1|chr20|-|SE|5567796|5567842|5567482|5567560|5570146|5570239	0.061	ENSG00000125772|GPCPD1|chr20|-|SE|5567796|5567842|5567482|5567560|5570146|5570239_UP
ENSG00000152795|HNRNPDL|chr4|-|SE|82425562|82425667|82424628|82424883|82426036|82426129	0.061	ENSG00000152795|HNRNPDL|chr4|-|SE|82425562|82425667|82424628|82424883|82426036|82426129_UP
ENSG00000148950|IMMP1L|chr11|-|SE|31477500|31477759|31433459|31433570|31509518|31509592	0.061	ENSG00000148950|IMMP1L|chr11|-|SE|31477500|31477759|31433459|31433570|31509518|31509592_UP
ENSG00000141068|KSR1|chr17|+|A3SS|27588193|27588535|27588474|27588535|27585656|27585661	0.061	ENSG00000141068|KSR1|chr17|+|A3SS|27588193|27588535|27588474|27588535|27585656|27585661_UP
ENSG00000124588|NQO2|chr6|+|SE|3015529|3015643|3012543|3012674|3016883|3016985	0.061	ENSG00000124588|NQO2|chr6|+|SE|3015529|3015643|3012543|3012674|3016883|3016985_UP
ENSG00000150593|PDCD4|chr10|+|A3SS|110881232|110881535|110881274|110881535|110875965|110876070	0.061	ENSG00000150593|PDCD4|chr10|+|A3SS|110881232|110881535|110881274|110881535|110875965|110876070_UP
ENSG00000092871|RFFL|chr17|-|SE|35017522|35017606|35016369|35016580|35021370|35021781	0.061	ENSG00000092871|RFFL|chr17|-|SE|35017522|35017606|35016369|35016580|35021370|35021781_UP
ENSG00000168066|SF1|chr11|-|A3SS|64767191|64767275|64767191|64767246|64767570|64767844	0.061	ENSG00000168066|SF1|chr11|-|A3SS|64767191|64767275|64767191|64767246|64767570|64767844_UP
ENSG00000141469|SLC14A1|chr18|+|SE|45727331|45727418|45724949|45725013|45730299|45730471	0.061	ENSG00000141469|SLC14A1|chr18|+|SE|45727331|45727418|45724949|45725013|45730299|45730471_UP
ENSG00000127616|SMARCA4|chr19|+|SE|11033766|11033865|11033081|11033517|11034122|11034146	0.061	ENSG00000127616|SMARCA4|chr19|+|SE|11033766|11033865|11033081|11033517|11034122|11034146_UP
ENSG00000118007|STAG1|chr3|-|SE|136363365|136363467|136359147|136359296|136366942|136367082	0.061	ENSG00000118007|STAG1|chr3|-|SE|136363365|136363467|136359147|136359296|136366942|136367082_UP
ENSG00000114316|USP4|chr3|-|SE|49278813|49278902|49277830|49278451|49280743|49280847	0.061	ENSG00000114316|USP4|chr3|-|SE|49278813|49278902|49277830|49278451|49280743|49280847_UP
ENSG00000171793|CTPS1|chr1|+|RI|41008658|41008890|41008658|41008714|41008793|41008890	0.062	ENSG00000171793|CTPS1|chr1|+|RI|41008658|41008890|41008658|41008714|41008793|41008890_UP
ENSG00000066322|ELOVL1|chr1|-|SE|43364927|43365097|43364737|43364794|43365185|43365376	0.062	ENSG00000066322|ELOVL1|chr1|-|SE|43364927|43365097|43364737|43364794|43365185|43365376_UP
ENSG00000214706|IFRD2|chr3|-|SE|50290387|50290472|50289928|50290294|50290559|50290679	0.062	ENSG00000214706|IFRD2|chr3|-|SE|50290387|50290472|50289928|50290294|50290559|50290679_UP
ENSG00000171401|KRT13|chr17|-|RI|41505055|41505597|41505055|41505235|41505446|41505597	0.062	ENSG00000171401|KRT13|chr17|-|RI|41505055|41505597|41505055|41505235|41505446|41505597_UP
ENSG00000050426|LETMD1|chr12|+|A5SS|51048326|51048518|51048326|51048478|51049033|51049185	0.062	ENSG00000050426|LETMD1|chr12|+|A5SS|51048326|51048518|51048326|51048478|51049033|51049185_UP
ENSG00000132780|NASP|chr1|+|SE|45600384|45600457|45591222|45591270|45602254|45602365	0.062	ENSG00000132780|NASP|chr1|+|SE|45600384|45600457|45591222|45591270|45602254|45602365_UP
ENSG00000137817|PARP6|chr15|-|SE|72249244|72249314|72242619|72242699|72250019|72250092	0.062	ENSG00000137817|PARP6|chr15|-|SE|72249244|72249314|72242619|72242699|72250019|72250092_UP
ENSG00000188313|PLSCR1|chr3|-|SE|146537995|146538044|146536539|146536565|146544466|146544547	0.062	ENSG00000188313|PLSCR1|chr3|-|SE|146537995|146538044|146536539|146536565|146544466|146544547_UP
ENSG00000143224|PPOX|chr1|+|RI|161167099|161167486|161167099|161167234|161167338|161167486	0.062	ENSG00000143224|PPOX|chr1|+|RI|161167099|161167486|161167099|161167234|161167338|161167486_UP
ENSG00000175166|PSMD2|chr3|+|A3SS|184301793|184302071|184301846|184302071|184301536|184301658	0.062	ENSG00000175166|PSMD2|chr3|+|A3SS|184301793|184302071|184301846|184302071|184301536|184301658_UP
ENSG00000100949|RABGGTA|chr14|-|RI|24266429|24266889|24266429|24266517|24266775|24266889	0.062	ENSG00000100949|RABGGTA|chr14|-|RI|24266429|24266889|24266429|24266517|24266775|24266889_UP
ENSG00000101347|SAMHD1|chr20|-|RI|36911217|36912552|36911217|36911333|36912460|36912552	0.062	ENSG00000101347|SAMHD1|chr20|-|RI|36911217|36912552|36911217|36911333|36912460|36912552_UP
ENSG00000160408|ST6GALNAC6|chr9|-|A5SS|127890636|127891043|127890655|127891043|127887483|127887591	0.062	ENSG00000160408|ST6GALNAC6|chr9|-|A5SS|127890636|127891043|127890655|127891043|127887483|127887591_UP
ENSG00000071564|TCF3|chr19|-|SE|1612206|1612433|1609289|1611849|1615284|1615485	0.062	ENSG00000071564|TCF3|chr19|-|SE|1612206|1612433|1609289|1611849|1615284|1615485_UP
ENSG00000142046|TMEM91|chr19|+|A3SS|41383560|41384083|41383873|41384083|41382771|41382921	0.062	ENSG00000142046|TMEM91|chr19|+|A3SS|41383560|41384083|41383873|41384083|41382771|41382921_UP
ENSG00000100284|TOM1|chr22|+|SE|35321741|35321847|35317876|35317961|35321958|35322037	0.062	ENSG00000100284|TOM1|chr22|+|SE|35321741|35321847|35317876|35317961|35321958|35322037_UP
ENSG00000111647|UHRF1BP1L|chr12|-|SE|100128579|100128725|100108385|100108548|100142591|100142824	0.062	ENSG00000111647|UHRF1BP1L|chr12|-|SE|100128579|100128725|100108385|100108548|100142591|100142824_UP
ENSG00000155313|USP25|chr21|+|SE|15849776|15849872|15842397|15842540|15864267|15864446	0.062	ENSG00000155313|USP25|chr21|+|SE|15849776|15849872|15842397|15842540|15864267|15864446_UP
ENSG00000137770|CTDSPL2|chr15|+|SE|44501961|44502048|44499726|44499813|44514597|44514660	0.063	ENSG00000137770|CTDSPL2|chr15|+|SE|44501961|44502048|44499726|44499813|44514597|44514660_UP
ENSG00000133943|DGLUCY|chr14|+|SE|91170002|91170201|91167224|91167378|91173288|91173436	0.063	ENSG00000133943|DGLUCY|chr14|+|SE|91170002|91170201|91167224|91167378|91173288|91173436_UP
ENSG00000161671|EMC10|chr19|+|SE|50481860|50481947|50480883|50480977|50482148|50483351	0.063	ENSG00000161671|EMC10|chr19|+|SE|50481860|50481947|50480883|50480977|50482148|50483351_UP
ENSG00000162747|FCGR3B|chr1|-|SE|161626144|161626402|161623195|161624639|161629777|161630032	0.063	ENSG00000162747|FCGR3B|chr1|-|SE|161626144|161626402|161623195|161624639|161629777|161630032_UP
ENSG00000114416|FXR1|chr3|+|SE|180914651|180914995|180912481|180912736|180933333|180933386	0.063	ENSG00000114416|FXR1|chr3|+|SE|180914651|180914995|180912481|180912736|180933333|180933386_UP
ENSG00000115204|MPV17|chr2|-|A3SS|27312993|27313154|27312993|27313109|27322447|27322522	0.063	ENSG00000115204|MPV17|chr2|-|A3SS|27312993|27313154|27312993|27313109|27322447|27322522_UP
ENSG00000115204|MPV17|chr2|-|RI|27312213|27312589|27312213|27312246|27312493|27312589	0.063	ENSG00000115204|MPV17|chr2|-|RI|27312213|27312589|27312213|27312246|27312493|27312589_UP
ENSG00000100558|PLEK2|chr14|-|SE|67392325|67392427|67390662|67390746|67392661|67392705	0.063	ENSG00000100558|PLEK2|chr14|-|SE|67392325|67392427|67390662|67390746|67392661|67392705_UP
ENSG00000197989|SNHG12|chr1|-|A5SS|28579911|28579981|28579941|28579981|28579532|28579587	0.063	ENSG00000197989|SNHG12|chr1|-|A5SS|28579911|28579981|28579941|28579981|28579532|28579587_UP
ENSG00000133226|SRRM1|chr1|+|SE|24654305|24654343|24652912|24653032|24654854|24655129	0.063	ENSG00000133226|SRRM1|chr1|+|SE|24654305|24654343|24652912|24653032|24654854|24655129_UP
ENSG00000126561|STAT5A|chr17|+|SE|42291971|42292061|42289865|42290022|42295618|42295793	0.063	ENSG00000126561|STAT5A|chr17|+|SE|42291971|42292061|42289865|42290022|42295618|42295793_UP
ENSG00000040341|STAU2|chr8|-|SE|73709031|73709177|73688653|73688813|73738283|73738349	0.063	ENSG00000040341|STAU2|chr8|-|SE|73709031|73709177|73688653|73688813|73738283|73738349_UP
ENSG00000140416|TPM1|chr15|+|MXE|63061197|63061273|63061712|63061788|63060868|63060939|63062214|63062277	0.063	ENSG00000140416|TPM1|chr15|+|MXE|63061197|63061273|63061712|63061788|63060868|63060939|63062214|63062277_UP
ENSG00000064201|TSPAN32|chr11|+|SE|2317345|2317525|2316228|2316667|2317862|2318142	0.063	ENSG00000064201|TSPAN32|chr11|+|SE|2317345|2317525|2316228|2316667|2317862|2318142_UP
ENSG00000135655|USP15|chr12|+|RI|62383839|62384302|62383839|62383998|62384077|62384302	0.063	ENSG00000135655|USP15|chr12|+|RI|62383839|62384302|62383839|62383998|62384077|62384302_UP
ENSG00000136051|WASHC4|chr12|+|A5SS|105133769|105133899|105133769|105133896|105137885|105138011	0.063	ENSG00000136051|WASHC4|chr12|+|A5SS|105133769|105133899|105133769|105133896|105137885|105138011_UP
ENSG00000179869|ABCA13|chr7|+|SE|48466952|48467045|48455036|48455286|48471529|48471599	0.064	ENSG00000179869|ABCA13|chr7|+|SE|48466952|48467045|48455036|48455286|48471529|48471599_UP
ENSG00000213983|AP1G2|chr14|-|SE|23561961|23562066|23561511|23561635|23562287|23562415	0.064	ENSG00000213983|AP1G2|chr14|-|SE|23561961|23562066|23561511|23561635|23562287|23562415_UP
ENSG00000123329|ARHGAP9|chr12|-|MXE|57474041|57474176|57474422|57474476|57473602|57473708|57474625|57474703	0.064	ENSG00000123329|ARHGAP9|chr12|-|MXE|57474041|57474176|57474422|57474476|57473602|57473708|57474625|57474703_UP
ENSG00000116017|ARID3A|chr19|+|SE|961761|961940|960091|960164|964247|964366	0.064	ENSG00000116017|ARID3A|chr19|+|SE|961761|961940|960091|960164|964247|964366_UP
ENSG00000198604|BAZ1A|chr14|-|SE|34786125|34786221|34785776|34786001|34792774|34792921	0.064	ENSG00000198604|BAZ1A|chr14|-|SE|34786125|34786221|34785776|34786001|34792774|34792921_UP
ENSG00000168487|BMP1|chr8|+|A3SS|22196180|22196840|22196679|22196840|22195461|22195587	0.064	ENSG00000168487|BMP1|chr8|+|A3SS|22196180|22196840|22196679|22196840|22195461|22195587_UP
ENSG00000136861|CDK5RAP2|chr9|-|SE|120407011|120407248|120404035|120404113|120408346|120408468	0.064	ENSG00000136861|CDK5RAP2|chr9|-|SE|120407011|120407248|120404035|120404113|120408346|120408468_UP
ENSG00000102805|CLN5|chr13|+|A3SS|76995842|76996127|76995901|76996127|76995062|76995228	0.064	ENSG00000102805|CLN5|chr13|+|A3SS|76995842|76996127|76995901|76996127|76995062|76995228_UP
ENSG00000163050|COQ8A|chr1|+|RI|226983760|226984235|226983760|226983854|226984093|226984235	0.064	ENSG00000163050|COQ8A|chr1|+|RI|226983760|226984235|226983760|226983854|226984093|226984235_UP
ENSG00000104093|DMXL2|chr15|-|SE|51451644|51451697|51450128|51450346|51453549|51453641	0.064	ENSG00000104093|DMXL2|chr15|-|SE|51451644|51451697|51450128|51450346|51453549|51453641_UP
ENSG00000144895|EIF2A|chr3|+|SE|150562556|150562660|150558387|150558462|150563514|150563614	0.064	ENSG00000144895|EIF2A|chr3|+|SE|150562556|150562660|150558387|150558462|150563514|150563614_UP
ENSG00000153310|FAM49B|chr8|-|SE|129904498|129904585|129903311|129903350|129912469|129912515	0.064	ENSG00000153310|FAM49B|chr8|-|SE|129904498|129904585|129903311|129903350|129912469|129912515_UP
ENSG00000187239|FNBP1|chr9|-|SE|129923843|129924026|129908889|129908999|129924959|129925157	0.064	ENSG00000187239|FNBP1|chr9|-|SE|129923843|129924026|129908889|129908999|129924959|129925157_UP
ENSG00000113648|H2AFY|chr5|-|SE|135352945|135353045|135345967|135346057|135360496|135360604	0.064	ENSG00000113648|H2AFY|chr5|-|SE|135352945|135353045|135345967|135346057|135360496|135360604_UP
ENSG00000162231|NXF1|chr11|-|SE|62804081|62804210|62803791|62803978|62805328|62805469	0.064	ENSG00000162231|NXF1|chr11|-|SE|62804081|62804210|62803791|62803978|62805328|62805469_UP
ENSG00000197111|PCBP2|chr12|+|SE|53467804|53467843|53467220|53467293|53468776|53468832	0.064	ENSG00000197111|PCBP2|chr12|+|SE|53467804|53467843|53467220|53467293|53468776|53468832_UP
ENSG00000197713|RPE|chr2|+|SE|210018152|210018221|210017472|210017559|210019668|210019940	0.064	ENSG00000197713|RPE|chr2|+|SE|210018152|210018221|210017472|210017559|210019668|210019940_UP
ENSG00000136699|SMPD4|chr2|-|RI|130154276|130155259|130154276|130154482|130155095|130155259	0.064	ENSG00000136699|SMPD4|chr2|-|RI|130154276|130155259|130154276|130154482|130155095|130155259_UP
ENSG00000258644|SYNJ2BP-COX16|chr14|-|MXE|70342657|70342729|70373032|70373131|70329173|70329236|70375675|70375771	0.064	ENSG00000258644|SYNJ2BP-COX16|chr14|-|MXE|70342657|70342729|70373032|70373131|70329173|70329236|70375675|70375771_UP
ENSG00000142046|TMEM91|chr19|+|RI|41382771|41384083|41382771|41382921|41383873|41384083	0.064	ENSG00000142046|TMEM91|chr19|+|RI|41382771|41384083|41382771|41382921|41383873|41384083_UP
ENSG00000103051|COG4|chr16|-|A3SS|70496265|70496431|70496265|70496379|70497220|70497387	0.065	ENSG00000103051|COG4|chr16|-|A3SS|70496265|70496431|70496265|70496379|70497220|70497387_UP
ENSG00000185000|DGAT1|chr8|-|RI|144318094|144318362|144318094|144318169|144318260|144318362	0.065	ENSG00000185000|DGAT1|chr8|-|RI|144318094|144318362|144318094|144318169|144318260|144318362_UP
ENSG00000063245|EPN1|chr19|+|SE|55689296|55689371|55688869|55688994|55689866|55689915	0.065	ENSG00000063245|EPN1|chr19|+|SE|55689296|55689371|55688869|55688994|55689866|55689915_UP
ENSG00000187741|FANCA|chr16|-|SE|89795905|89796018|89792470|89792547|89799165|89799232	0.065	ENSG00000187741|FANCA|chr16|-|SE|89795905|89796018|89792470|89792547|89799165|89799232_UP
ENSG00000198130|HIBCH|chr2|-|SE|190208879|190208913|190204633|190205232|190212955|190213075	0.065	ENSG00000198130|HIBCH|chr2|-|SE|190208879|190208913|190204633|190205232|190212955|190213075_UP
ENSG00000110917|MLEC|chr12|+|SE|120694823|120695000|120693993|120694269|120696315|120696578	0.065	ENSG00000110917|MLEC|chr12|+|SE|120694823|120695000|120693993|120694269|120696315|120696578_UP
ENSG00000074356|NCBP3|chr17|-|A5SS|3823792|3825050|3824941|3825050|3821952|3822052	0.065	ENSG00000074356|NCBP3|chr17|-|A5SS|3823792|3825050|3824941|3825050|3821952|3822052_UP
ENSG00000145632|PLK2|chr5|-|RI|58458083|58458528|58458083|58458171|58458398|58458528	0.065	ENSG00000145632|PLK2|chr5|-|RI|58458083|58458528|58458083|58458171|58458398|58458528_UP
ENSG00000108946|PRKAR1A|chr17|+|SE|68514986|68515119|68512449|68512548|68515393|68515536	0.065	ENSG00000108946|PRKAR1A|chr17|+|SE|68514986|68515119|68512449|68512548|68515393|68515536_UP
ENSG00000164327|RICTOR|chr5|-|A3SS|38945490|38945724|38945490|38945610|38946467|38946552	0.065	ENSG00000164327|RICTOR|chr5|-|A3SS|38945490|38945724|38945490|38945610|38946467|38946552_UP
ENSG00000133226|SRRM1|chr1|+|SE|24663182|24663224|24662659|24662804|24666814|24666845	0.065	ENSG00000133226|SRRM1|chr1|+|SE|24663182|24663224|24662659|24662804|24666814|24666845_UP
ENSG00000213593|TMX2|chr11|+|SE|57737835|57738026|57737607|57737668|57738353|57738430	0.065	ENSG00000213593|TMX2|chr11|+|SE|57737835|57738026|57737607|57737668|57738353|57738430_UP
ENSG00000151239|TWF1|chr12|-|SE|43805830|43806002|43804494|43804572|43806220|43806282	0.065	ENSG00000151239|TWF1|chr12|-|SE|43805830|43806002|43804494|43804572|43806220|43806282_UP
ENSG00000160201|U2AF1|chr21|-|RI|43092955|43094563|43092955|43093249|43094470|43094563	0.065	ENSG00000160201|U2AF1|chr21|-|RI|43092955|43094563|43092955|43093249|43094470|43094563_UP
ENSG00000169764|UGP2|chr2|+|SE|63842538|63842599|63840968|63841232|63856305|63856433	0.065	ENSG00000169764|UGP2|chr2|+|SE|63842538|63842599|63840968|63841232|63856305|63856433_UP
ENSG00000159363|ATP13A2|chr1|-|SE|16986462|16986632|16985957|16986358|16986804|16986956	0.066	ENSG00000159363|ATP13A2|chr1|-|SE|16986462|16986632|16985957|16986358|16986804|16986956_UP
ENSG00000113916|BCL6|chr3|-|SE|187726730|187726898|187725498|187725629|187728359|187728544	0.066	ENSG00000113916|BCL6|chr3|-|SE|187726730|187726898|187725498|187725629|187728359|187728544_UP
ENSG00000103502|CDIPT|chr16|-|SE|29862585|29862635|29861105|29861259|29862814|29863276	0.066	ENSG00000103502|CDIPT|chr16|-|SE|29862585|29862635|29861105|29861259|29862814|29863276_UP
ENSG00000120699|EXOSC8|chr13|+|SE|37002272|37002309|37000540|37000822|37002487|37002551	0.066	ENSG00000120699|EXOSC8|chr13|+|SE|37002272|37002309|37000540|37000822|37002487|37002551_UP
ENSG00000144711|IQSEC1|chr3|-|SE|12902772|12902822|12900752|12901522|12908348|12908525	0.066	ENSG00000144711|IQSEC1|chr3|-|SE|12902772|12902822|12900752|12901522|12908348|12908525_UP
ENSG00000107929|LARP4B|chr10|-|RI|806913|813213|806913|808272|812920|813213	0.066	ENSG00000107929|LARP4B|chr10|-|RI|806913|813213|806913|808272|812920|813213_UP
ENSG00000118513|MYB|chr6|+|MXE|135196725|135196908|135196960|135197323|135195747|135195917|135198907|135199050	0.066	ENSG00000118513|MYB|chr6|+|MXE|135196725|135196908|135196960|135197323|135195747|135195917|135198907|135199050_UP
ENSG00000100105|PATZ1|chr22|-|SE|31328786|31328924|31325803|31327309|31335691|31335863	0.066	ENSG00000100105|PATZ1|chr22|-|SE|31328786|31328924|31325803|31327309|31335691|31335863_UP
ENSG00000136147|PHF11|chr13|+|SE|49521137|49521500|49520893|49520940|49522042|49522088	0.066	ENSG00000136147|PHF11|chr13|+|SE|49521137|49521500|49520893|49520940|49522042|49522088_UP
ENSG00000049541|RFC2|chr7|-|SE|74246661|74246763|74243145|74243246|74249738|74249780	0.066	ENSG00000049541|RFC2|chr7|-|SE|74246661|74246763|74243145|74243246|74249738|74249780_UP
ENSG00000100650|SRSF5|chr14|+|RI|69768797|69770540|69768797|69769251|69770466|69770540	0.066	ENSG00000100650|SRSF5|chr14|+|RI|69768797|69770540|69768797|69769251|69770466|69770540_UP
ENSG00000117143|UAP1|chr1|+|SE|162592734|162592782|162590322|162590511|162597791|162597858	0.066	ENSG00000117143|UAP1|chr1|+|SE|162592734|162592782|162590322|162590511|162597791|162597858_UP
ENSG00000116213|WRAP73|chr1|-|SE|3635943|3636030|3635159|3635294|3636994|3637057	0.066	ENSG00000116213|WRAP73|chr1|-|SE|3635943|3636030|3635159|3635294|3636994|3637057_UP
ENSG00000130803|ZNF317|chr19|+|A3SS|9157833|9158075|9157979|9158075|9157267|9157394	0.066	ENSG00000130803|ZNF317|chr19|+|A3SS|9157833|9158075|9157979|9158075|9157267|9157394_UP
ENSG00000104325|DECR1|chr8|+|SE|90005447|90005731|90001476|90001561|90017123|90017326	0.067	ENSG00000104325|DECR1|chr8|+|SE|90005447|90005731|90001476|90001561|90017123|90017326_UP
ENSG00000161960|EIF4A1|chr17|+|RI|7577826|7578244|7577826|7577916|7578164|7578244	0.067	ENSG00000161960|EIF4A1|chr17|+|RI|7577826|7578244|7577826|7577916|7578164|7578244_UP
ENSG00000139636|LMBR1L|chr12|-|SE|49106510|49106746|49105923|49105957|49106960|49107011	0.067	ENSG00000139636|LMBR1L|chr12|-|SE|49106510|49106746|49105923|49105957|49106960|49107011_UP
ENSG00000173531|MST1|chr3|-|A3SS|49685011|49685089|49685011|49685085|49685261|49685382	0.067	ENSG00000173531|MST1|chr3|-|A3SS|49685011|49685089|49685011|49685085|49685261|49685382_UP
ENSG00000118513|MYB|chr6|+|SE|135190126|135190347|135189790|135189883|135192323|135192558	0.067	ENSG00000118513|MYB|chr6|+|SE|135190126|135190347|135189790|135189883|135192323|135192558_UP
ENSG00000168297|PXK|chr3|+|SE|58423460|58423494|58412903|58412963|58424751|58426019	0.067	ENSG00000168297|PXK|chr3|+|SE|58423460|58423494|58412903|58412963|58424751|58426019_UP
ENSG00000136824|SMC2|chr9|+|SE|104135867|104136060|104134414|104134575|104138017|104138165	0.067	ENSG00000136824|SMC2|chr9|+|SE|104135867|104136060|104134414|104134575|104138017|104138165_UP
ENSG00000121067|SPOP|chr17|-|SE|49668026|49668078|49622732|49622876|49677932|49678003	0.067	ENSG00000121067|SPOP|chr17|-|SE|49668026|49668078|49622732|49622876|49677932|49678003_UP
ENSG00000284770|TBCE|chr1|+|A5SS|235442851|235442961|235442851|235442911|235448348|235448440	0.067	ENSG00000284770|TBCE|chr1|+|A5SS|235442851|235442961|235442851|235442911|235448348|235448440_UP
ENSG00000225889|AC012368.1|chr2|+|SE|64229170|64229288|64228452|64228522|64229496|64229640	0.068	ENSG00000225889|AC012368.1|chr2|+|SE|64229170|64229288|64228452|64228522|64229496|64229640_UP
ENSG00000196839|ADA|chr20|-|SE|44623006|44623078|44622828|44622930|44624201|44624329	0.068	ENSG00000196839|ADA|chr20|-|SE|44623006|44623078|44622828|44622930|44624201|44624329_UP
ENSG00000100325|ASCC2|chr22|-|SE|29834441|29834550|29832244|29832342|29838177|29838274	0.068	ENSG00000100325|ASCC2|chr22|-|SE|29834441|29834550|29832244|29832342|29838177|29838274_UP
ENSG00000122882|ECD|chr10|-|MXE|73152292|73152421|73154255|73154448|73148275|73148404|73156274|73156453	0.068	ENSG00000122882|ECD|chr10|-|MXE|73152292|73152421|73154255|73154448|73148275|73148404|73156274|73156453_UP
ENSG00000119616|FCF1|chr14|+|A5SS|74713484|74713620|74713484|74713552|74714871|74714943	0.068	ENSG00000119616|FCF1|chr14|+|A5SS|74713484|74713620|74713484|74713552|74714871|74714943_UP
ENSG00000061273|HDAC7|chr12|-|SE|47792537|47792669|47791870|47792004|47793368|47793542	0.068	ENSG00000061273|HDAC7|chr12|-|SE|47792537|47792669|47791870|47792004|47793368|47793542_UP
ENSG00000119185|ITGB1BP1|chr2|-|SE|9414177|9414256|9412067|9412405|9423372|9423522	0.068	ENSG00000119185|ITGB1BP1|chr2|-|SE|9414177|9414256|9412067|9412405|9423372|9423522_UP
ENSG00000111052|LIN7A|chr12|-|SE|80848098|80848175|80845729|80845939|80848250|80848322	0.068	ENSG00000111052|LIN7A|chr12|-|SE|80848098|80848175|80845729|80845939|80848250|80848322_UP
ENSG00000140563|MCTP2|chr15|+|SE|94314726|94314864|94314281|94314344|94315528|94315637	0.068	ENSG00000140563|MCTP2|chr15|+|SE|94314726|94314864|94314281|94314344|94315528|94315637_UP
ENSG00000099917|MED15|chr22|+|SE|20582610|20582747|20568520|20568631|20582839|20582967	0.068	ENSG00000099917|MED15|chr22|+|SE|20582610|20582747|20568520|20568631|20582839|20582967_UP
ENSG00000123240|OPTN|chr10|+|A3SS|13118887|13119040|13118905|13119040|13116266|13116340	0.068	ENSG00000123240|OPTN|chr10|+|A3SS|13118887|13119040|13118905|13119040|13116266|13116340_UP
ENSG00000203875|SNHG5|chr6|-|SE|85677794|85677868|85677423|85677492|85677953|85678032	0.068	ENSG00000203875|SNHG5|chr6|-|SE|85677794|85677868|85677423|85677492|85677953|85678032_UP
ENSG00000203705|TATDN3|chr1|+|SE|212802700|212802763|212797111|212797196|212804319|212804429	0.068	ENSG00000203705|TATDN3|chr1|+|SE|212802700|212802763|212797111|212797196|212804319|212804429_UP
ENSG00000142046|TMEM91|chr19|+|A3SS|41383714|41384083|41383873|41384083|41382771|41382921	0.068	ENSG00000142046|TMEM91|chr19|+|A3SS|41383714|41384083|41383873|41384083|41382771|41382921_UP
ENSG00000124731|TREM1|chr6|-|SE|41280960|41281153|41275203|41276230|41282394|41282751	0.068	ENSG00000124731|TREM1|chr6|-|SE|41280960|41281153|41275203|41276230|41282394|41282751_UP
ENSG00000136044|APPL2|chr12|-|A3SS|105189771|105189889|105189771|105189824|105189990|105190155	0.069	ENSG00000136044|APPL2|chr12|-|A3SS|105189771|105189889|105189771|105189824|105189990|105190155_UP
ENSG00000168724|DNAJC21|chr5|+|A3SS|34945721|34945803|34945760|34945803|34944866|34945025	0.069	ENSG00000168724|DNAJC21|chr5|+|A3SS|34945721|34945803|34945760|34945803|34944866|34945025_UP
ENSG00000087470|DNM1L|chr12|+|SE|32738263|32738296|32737104|32737161|32740063|32740240	0.069	ENSG00000087470|DNM1L|chr12|+|SE|32738263|32738296|32737104|32737161|32740063|32740240_UP
ENSG00000182473|EXOC7|chr17|-|A3SS|76090328|76090481|76090328|76090397|76091142|76091235	0.069	ENSG00000182473|EXOC7|chr17|-|A3SS|76090328|76090481|76090328|76090397|76091142|76091235_UP
ENSG00000213930|GALT|chr9|+|A3SS|34648047|34648171|34648114|34648171|34647656|34647961	0.069	ENSG00000213930|GALT|chr9|+|A3SS|34648047|34648171|34648114|34648171|34647656|34647961_UP
ENSG00000125447|GGA3|chr17|-|RI|75240341|75241057|75240341|75240412|75240811|75241057	0.069	ENSG00000125447|GGA3|chr17|-|RI|75240341|75241057|75240341|75240412|75240811|75241057_UP
ENSG00000167468|GPX4|chr19|+|SE|1106180|1106266|1105657|1105809|1106399|1106443	0.069	ENSG00000167468|GPX4|chr19|+|SE|1106180|1106266|1105657|1105809|1106399|1106443_UP
ENSG00000132463|GRSF1|chr4|-|RI|70825295|70826245|70825295|70825431|70826123|70826245	0.069	ENSG00000132463|GRSF1|chr4|-|RI|70825295|70826245|70825295|70825431|70826123|70826245_UP
ENSG00000213397|HAUS7|chrX|-|RI|153454393|153455766|153454393|153454508|153455541|153455766	0.069	ENSG00000213397|HAUS7|chrX|-|RI|153454393|153455766|153454393|153454508|153455541|153455766_UP
ENSG00000142945|KIF2C|chr1|+|SE|44753131|44753254|44750441|44750564|44753732|44753833	0.069	ENSG00000142945|KIF2C|chr1|+|SE|44753131|44753254|44750441|44750564|44753732|44753833_UP
ENSG00000118058|KMT2A|chr11|+|A3SS|118471661|118474315|118474178|118474315|118468774|118468844	0.069	ENSG00000118058|KMT2A|chr11|+|A3SS|118471661|118474315|118474178|118474315|118468774|118468844_UP
ENSG00000152601|MBNL1|chr3|+|SE|152458129|152458193|152456266|152456361|152459270|152459327	0.069	ENSG00000152601|MBNL1|chr3|+|SE|152458129|152458193|152456266|152456361|152459270|152459327_UP
ENSG00000129255|MPDU1|chr17|+|RI|7586898|7587271|7586898|7587017|7587160|7587271	0.069	ENSG00000129255|MPDU1|chr17|+|RI|7586898|7587271|7586898|7587017|7587160|7587271_UP
ENSG00000101608|MYL12A|chr18|+|SE|3249561|3249723|3249360|3249443|3253232|3253284	0.069	ENSG00000101608|MYL12A|chr18|+|SE|3249561|3249723|3249360|3249443|3253232|3253284_UP
ENSG00000175115|PACS1|chr11|+|SE|66242911|66243031|66241226|66241653|66243164|66243234	0.069	ENSG00000175115|PACS1|chr11|+|SE|66242911|66243031|66241226|66241653|66243164|66243234_UP
ENSG00000072310|SREBF1|chr17|-|SE|17813367|17813479|17812072|17812851|17813568|17813769	0.069	ENSG00000072310|SREBF1|chr17|-|SE|17813367|17813479|17812072|17812851|17813568|17813769_UP
ENSG00000135457|TFCP2|chr12|-|SE|51109120|51109273|51107235|51107346|51110876|51110983	0.069	ENSG00000135457|TFCP2|chr12|-|SE|51109120|51109273|51107235|51107346|51110876|51110983_UP
ENSG00000171204|TMEM126B|chr11|+|SE|85629131|85629262|85628592|85628688|85631144|85631316	0.069	ENSG00000171204|TMEM126B|chr11|+|SE|85629131|85629262|85628592|85628688|85631144|85631316_UP
ENSG00000104907|TRMT1|chr19|-|RI|13105266|13105606|13105266|13105396|13105486|13105606	0.069	ENSG00000104907|TRMT1|chr19|-|RI|13105266|13105606|13105266|13105396|13105486|13105606_UP
ENSG00000114779|ABHD14B|chr3|-|SE|51971459|51971698|51969083|51970184|51973964|51974021	0.07	ENSG00000114779|ABHD14B|chr3|-|SE|51971459|51971698|51969083|51970184|51973964|51974021_UP
ENSG00000168397|ATG4B|chr2|+|SE|241651883|241652012|241651263|241651335|241653306|241653333	0.07	ENSG00000168397|ATG4B|chr2|+|SE|241651883|241652012|241651263|241651335|241653306|241653333_UP
ENSG00000136908|DPM2|chr9|-|RI|127936552|127937523|127936552|127936655|127937433|127937523	0.07	ENSG00000136908|DPM2|chr9|-|RI|127936552|127937523|127936552|127936655|127937433|127937523_UP
ENSG00000169592|INO80E|chr16|+|SE|30001413|30001530|30000928|30001040|30005220|30005793	0.07	ENSG00000169592|INO80E|chr16|+|SE|30001413|30001530|30000928|30001040|30005220|30005793_UP
ENSG00000139636|LMBR1L|chr12|-|SE|49106544|49106746|49105923|49105957|49106960|49107045	0.07	ENSG00000139636|LMBR1L|chr12|-|SE|49106544|49106746|49105923|49105957|49106960|49107045_UP
ENSG00000101158|NELFCD|chr20|+|RI|58992997|58993544|58992997|58993112|58993448|58993544	0.07	ENSG00000101158|NELFCD|chr20|+|RI|58992997|58993544|58992997|58993112|58993448|58993544_UP
ENSG00000109118|PHF12|chr17|-|SE|28926781|28926873|28923908|28924302|28926990|28927063	0.07	ENSG00000109118|PHF12|chr17|-|SE|28926781|28926873|28923908|28924302|28926990|28927063_UP
ENSG00000180228|PRKRA|chr2|-|SE|178445425|178445535|178444421|178444500|178447504|178447586	0.07	ENSG00000180228|PRKRA|chr2|-|SE|178445425|178445535|178444421|178444500|178447504|178447586_UP
ENSG00000237441|RGL2|chr6|-|SE|33298454|33298651|33297031|33297115|33298869|33299324	0.07	ENSG00000237441|RGL2|chr6|-|SE|33298454|33298651|33297031|33297115|33298869|33299324_UP
ENSG00000136104|RNASEH2B|chr13|+|SE|50953904|50953985|50947986|50949505|50969931|50970413	0.07	ENSG00000136104|RNASEH2B|chr13|+|SE|50953904|50953985|50947986|50949505|50969931|50970413_UP
ENSG00000141469|SLC14A1|chr18|+|SE|45727260|45727418|45724949|45725013|45730299|45730471	0.07	ENSG00000141469|SLC14A1|chr18|+|SE|45727260|45727418|45724949|45725013|45730299|45730471_UP
ENSG00000171206|TRIM8|chr10|+|SE|102654652|102654748|102642309|102645187|102655079|102655313	0.07	ENSG00000171206|TRIM8|chr10|+|SE|102654652|102654748|102642309|102645187|102655079|102655313_UP
ENSG00000148700|ADD3|chr10|+|SE|110132304|110132400|110130362|110130486|110133325|110134211	0.071	ENSG00000148700|ADD3|chr10|+|SE|110132304|110132400|110130362|110130486|110133325|110134211_UP
ENSG00000142192|APP|chr21|-|MXE|25997359|25997416|26000014|26000182|25982343|25982477|26021839|26022042	0.071	ENSG00000142192|APP|chr21|-|MXE|25997359|25997416|26000014|26000182|25982343|25982477|26021839|26022042_UP
ENSG00000172322|CLEC12A|chr12|+|A3SS|9978965|9979524|9979335|9979524|9971596|9971687	0.071	ENSG00000172322|CLEC12A|chr12|+|A3SS|9978965|9979524|9979335|9979524|9971596|9971687_UP
ENSG00000178234|GALNT11|chr7|+|SE|152116903|152117038|152113244|152113398|152117156|152117375	0.071	ENSG00000178234|GALNT11|chr7|+|SE|152116903|152117038|152113244|152113398|152117156|152117375_UP
ENSG00000093167|LRRFIP2|chr3|-|SE|37154613|37154656|37148893|37149038|37174538|37174605	0.071	ENSG00000093167|LRRFIP2|chr3|-|SE|37154613|37154656|37148893|37149038|37174538|37174605_UP
ENSG00000165819|METTL3|chr14|-|RI|21499024|21499600|21499024|21499137|21499491|21499600	0.071	ENSG00000165819|METTL3|chr14|-|RI|21499024|21499600|21499024|21499137|21499491|21499600_UP
ENSG00000112651|MRPL2|chr6|-|SE|43055544|43055618|43054028|43054486|43055896|43056007	0.071	ENSG00000112651|MRPL2|chr6|-|SE|43055544|43055618|43054028|43054486|43055896|43056007_UP
ENSG00000130305|NSUN5|chr7|-|RI|73307582|73308553|73307582|73307757|73308430|73308553	0.071	ENSG00000130305|NSUN5|chr7|-|RI|73307582|73308553|73307582|73307757|73308430|73308553_UP
ENSG00000018280|SLC11A1|chr2|+|SE|218384242|218384365|218382202|218382375|218385146|218385266	0.071	ENSG00000018280|SLC11A1|chr2|+|SE|218384242|218384365|218382202|218382375|218385146|218385266_UP
ENSG00000111707|SUDS3|chr12|+|SE|118401982|118402004|118401758|118401820|118403411|118403517	0.071	ENSG00000111707|SUDS3|chr12|+|SE|118401982|118402004|118401758|118401820|118403411|118403517_UP
ENSG00000129925|TMEM8A|chr16|-|SE|372610|372727|370772|372283|374004|374151	0.071	ENSG00000129925|TMEM8A|chr16|-|SE|372610|372727|370772|372283|374004|374151_UP
ENSG00000114062|UBE3A|chr15|-|RI|25333727|25340228|25333727|25339257|25340084|25340228	0.071	ENSG00000114062|UBE3A|chr15|-|RI|25333727|25340228|25333727|25339257|25340084|25340228_UP
ENSG00000011198|ABHD5|chr3|+|SE|43717670|43717857|43714946|43715058|43718442|43718561	0.072	ENSG00000011198|ABHD5|chr3|+|SE|43717670|43717857|43714946|43715058|43718442|43718561_UP
ENSG00000283189|AC104452.1|chr3|-|RI|49419259|49420342|49419259|49419405|49419709|49420342	0.072	ENSG00000283189|AC104452.1|chr3|-|RI|49419259|49420342|49419259|49419405|49419709|49420342_UP
ENSG00000158850|B4GALT3|chr1|-|SE|161176911|161177106|161176433|161176579|161177422|161177468	0.072	ENSG00000158850|B4GALT3|chr1|-|SE|161176911|161177106|161176433|161176579|161177422|161177468_UP
ENSG00000162613|FUBP1|chr1|-|A3SS|77948404|77948914|77948404|77948774|77949154|77949300	0.072	ENSG00000162613|FUBP1|chr1|-|A3SS|77948404|77948914|77948404|77948774|77949154|77949300_UP
ENSG00000184117|NIPSNAP1|chr22|-|SE|29580098|29580155|29570404|29570532|29580984|29581074	0.072	ENSG00000184117|NIPSNAP1|chr22|-|SE|29580098|29580155|29570404|29570532|29580984|29581074_UP
ENSG00000054148|PHPT1|chr9|+|A5SS|136850012|136850560|136850012|136850137|136850754|136851022	0.072	ENSG00000054148|PHPT1|chr9|+|A5SS|136850012|136850560|136850012|136850137|136850754|136851022_UP
ENSG00000132581|SDF2|chr17|-|SE|28651485|28651542|28648841|28649276|28655286|28655483	0.072	ENSG00000132581|SDF2|chr17|-|SE|28651485|28651542|28648841|28649276|28655286|28655483_UP
ENSG00000203875|SNHG5|chr6|-|SE|85677794|85677899|85677423|85677492|85677953|85678032	0.072	ENSG00000203875|SNHG5|chr6|-|SE|85677794|85677899|85677423|85677492|85677953|85678032_UP
ENSG00000100242|SUN2|chr22|-|A5SS|38740888|38741050|38741006|38741050|38740266|38740432	0.072	ENSG00000100242|SUN2|chr22|-|A5SS|38740888|38741050|38741006|38741050|38740266|38740432_UP
ENSG00000196998|WDR45|chrX|-|MXE|49076429|49076524|49077642|49077747|49075865|49075945|49077836|49077911	0.072	ENSG00000196998|WDR45|chrX|-|MXE|49076429|49076524|49077642|49077747|49075865|49075945|49077836|49077911_UP
ENSG00000133858|ZFC3H1|chr12|-|RI|71656342|71657301|71656342|71656563|71656884|71657301	0.072	ENSG00000133858|ZFC3H1|chr12|-|RI|71656342|71657301|71656342|71656563|71656884|71657301_UP
ENSG00000147394|ZNF185|chrX|+|SE|152936417|152936513|152932872|152932971|152938073|152938163	0.072	ENSG00000147394|ZNF185|chrX|+|SE|152936417|152936513|152932872|152932971|152938073|152938163_UP
ENSG00000131069|ACSS2|chr20|+|SE|34908904|34908943|34882793|34882989|34913095|34913187	0.073	ENSG00000131069|ACSS2|chr20|+|SE|34908904|34908943|34882793|34882989|34913095|34913187_UP
ENSG00000100823|APEX1|chr14|+|A5SS|20455225|20455389|20455225|20455328|20455577|20455703	0.073	ENSG00000100823|APEX1|chr14|+|A5SS|20455225|20455389|20455225|20455328|20455577|20455703_UP
ENSG00000021776|AQR|chr15|-|RI|34873827|34874864|34873827|34873999|34874676|34874864	0.073	ENSG00000021776|AQR|chr15|-|RI|34873827|34874864|34873827|34873999|34874676|34874864_UP
ENSG00000069399|BCL3|chr19|+|RI|44758245|44758841|44758245|44758473|44758723|44758841	0.073	ENSG00000069399|BCL3|chr19|+|RI|44758245|44758841|44758245|44758473|44758723|44758841_UP
ENSG00000177830|CHID1|chr11|-|MXE|884067|884169|893426|893519|883147|883303|899339|899401	0.073	ENSG00000177830|CHID1|chr11|-|MXE|884067|884169|893426|893519|883147|883303|899339|899401_UP
ENSG00000103121|CMC2|chr16|-|SE|80980769|80980879|80975801|80976179|80981805|80981877	0.073	ENSG00000103121|CMC2|chr16|-|SE|80980769|80980879|80975801|80976179|80981805|80981877_UP
ENSG00000113742|CPEB4|chr5|+|MXE|173932449|173932500|173943025|173943049|173910522|173910604|173944966|173945140	0.073	ENSG00000113742|CPEB4|chr5|+|MXE|173932449|173932500|173943025|173943049|173910522|173910604|173944966|173945140_UP
ENSG00000158555|GDPD5|chr11|-|SE|75448491|75448649|75444412|75444495|75448976|75449122	0.073	ENSG00000158555|GDPD5|chr11|-|SE|75448491|75448649|75444412|75444495|75448976|75449122_UP
ENSG00000149657|LSM14B|chr20|+|A3SS|62126225|62126439|62126303|62126439|62124616|62124780	0.073	ENSG00000149657|LSM14B|chr20|+|A3SS|62126225|62126439|62126303|62126439|62124616|62124780_UP
ENSG00000168958|MFF|chr2|+|SE|227342744|227342819|227340291|227340380|227355676|227355761	0.073	ENSG00000168958|MFF|chr2|+|SE|227342744|227342819|227340291|227340380|227355676|227355761_UP
ENSG00000179820|MYADM|chr19|+|A3SS|53869689|53869838|53869753|53869838|53867882|53867943	0.073	ENSG00000179820|MYADM|chr19|+|A3SS|53869689|53869838|53869753|53869838|53867882|53867943_UP
ENSG00000142731|PLK4|chr4|+|SE|127891578|127891681|127890996|127891196|127892364|127892514	0.073	ENSG00000142731|PLK4|chr4|+|SE|127891578|127891681|127890996|127891196|127892364|127892514_UP
ENSG00000138777|PPA2|chr4|-|SE|105456695|105456745|105453597|105453642|105473893|105474059	0.073	ENSG00000138777|PPA2|chr4|-|SE|105456695|105456745|105453597|105453642|105473893|105474059_UP
ENSG00000127314|RAP1B|chr12|+|MXE|68624670|68624873|68641033|68641153|68610907|68611043|68648698|68648781	0.073	ENSG00000127314|RAP1B|chr12|+|MXE|68624670|68624873|68641033|68641153|68610907|68611043|68648698|68648781_UP
ENSG00000173039|RELA|chr11|-|MXE|65660123|65660215|65661686|65661835|65659665|65659797|65661936|65662088	0.073	ENSG00000173039|RELA|chr11|-|MXE|65660123|65660215|65661686|65661835|65659665|65659797|65661936|65662088_UP
ENSG00000145604|SKP2|chr5|+|SE|36163644|36163756|36152770|36153042|36166518|36166662	0.073	ENSG00000145604|SKP2|chr5|+|SE|36163644|36163756|36152770|36153042|36166518|36166662_UP
ENSG00000164211|STARD4|chr5|-|SE|111507328|111507442|111506215|111506379|111512384|111512471	0.073	ENSG00000164211|STARD4|chr5|-|SE|111507328|111507442|111506215|111506379|111512384|111512471_UP
ENSG00000168397|ATG4B|chr2|+|MXE|241651883|241651974|241653306|241653369|241651263|241651335|241653511|241653610	0.074	ENSG00000168397|ATG4B|chr2|+|MXE|241651883|241651974|241653306|241653369|241651263|241651335|241653511|241653610_UP
ENSG00000111665|CDCA3|chr12|-|A3SS|6849322|6849429|6849322|6849413|6849564|6849858	0.074	ENSG00000111665|CDCA3|chr12|-|A3SS|6849322|6849429|6849322|6849413|6849564|6849858_UP
ENSG00000215301|DDX3X|chrX|+|RI|41346858|41347451|41346858|41347012|41347314|41347451	0.074	ENSG00000215301|DDX3X|chrX|+|RI|41346858|41347451|41346858|41347012|41347314|41347451_UP
ENSG00000111817|DSE|chr6|+|SE|116430953|116431193|116426573|116426827|116435586|116438243	0.074	ENSG00000111817|DSE|chr6|+|SE|116430953|116431193|116426573|116426827|116435586|116438243_UP
ENSG00000125740|FOSB|chr19|+|SE|45471193|45471301|45469875|45470949|45472550|45472553	0.074	ENSG00000125740|FOSB|chr19|+|SE|45471193|45471301|45469875|45470949|45472550|45472553_UP
ENSG00000168961|LGALS9|chr17|+|SE|27645313|27645349|27642237|27642348|27645860|27645899	0.074	ENSG00000168961|LGALS9|chr17|+|SE|27645313|27645349|27642237|27642348|27645860|27645899_UP
ENSG00000215375|MYL5|chr4|+|A5SS|678957|679173|678957|679033|679913|680018	0.074	ENSG00000215375|MYL5|chr4|+|A5SS|678957|679173|678957|679033|679913|680018_UP
ENSG00000166803|PCLAF|chr15|-|SE|64376742|64376905|64364310|64366075|64380957|64381038	0.074	ENSG00000166803|PCLAF|chr15|-|SE|64376742|64376905|64364310|64366075|64380957|64381038_UP
ENSG00000145725|PPIP5K2|chr5|+|SE|103186319|103186439|103184671|103184744|103190841|103190982	0.074	ENSG00000145725|PPIP5K2|chr5|+|SE|103186319|103186439|103184671|103184744|103190841|103190982_UP
ENSG00000130348|QRSL1|chr6|+|SE|106640100|106640206|106629598|106629705|106640348|106640508	0.074	ENSG00000130348|QRSL1|chr6|+|SE|106640100|106640206|106629598|106629705|106640348|106640508_UP
ENSG00000145901|TNIP1|chr5|-|SE|151033607|151033799|151032286|151032383|151035001|151035067	0.074	ENSG00000145901|TNIP1|chr5|-|SE|151033607|151033799|151032286|151032383|151035001|151035067_UP
ENSG00000177479|ARIH2|chr3|+|A5SS|48924717|48924971|48924717|48924839|48927461|48927813	0.075	ENSG00000177479|ARIH2|chr3|+|A5SS|48924717|48924971|48924717|48924839|48927461|48927813_UP
ENSG00000132676|DAP3|chr1|+|MXE|155731943|155732033|155736945|155737063|155731355|155731415|155738156|155738529	0.075	ENSG00000132676|DAP3|chr1|+|MXE|155731943|155732033|155736945|155737063|155731355|155731415|155738156|155738529_UP
ENSG00000074603|DPP8|chr15|-|SE|65515655|65515791|65512294|65512564|65517485|65517704	0.075	ENSG00000074603|DPP8|chr15|-|SE|65515655|65515791|65512294|65512564|65517485|65517704_UP
ENSG00000066322|ELOVL1|chr1|-|A5SS|43364614|43364647|43364618|43364647|43364323|43364460	0.075	ENSG00000066322|ELOVL1|chr1|-|A5SS|43364614|43364647|43364618|43364647|43364323|43364460_UP
ENSG00000066322|ELOVL1|chr1|-|SE|43366267|43366411|43365563|43365623|43367914|43368003	0.075	ENSG00000066322|ELOVL1|chr1|-|SE|43366267|43366411|43365563|43365623|43367914|43368003_UP
ENSG00000170271|FAXDC2|chr5|-|SE|154834624|154834728|154823307|154823592|154834842|154834934	0.075	ENSG00000170271|FAXDC2|chr5|-|SE|154834624|154834728|154823307|154823592|154834842|154834934_UP
ENSG00000134452|FBH1|chr10|+|SE|5905217|5905287|5903165|5903175|5906036|5906632	0.075	ENSG00000134452|FBH1|chr10|+|SE|5905217|5905287|5903165|5903175|5906036|5906632_UP
ENSG00000136068|FLNB|chr3|+|SE|58131926|58132019|58130740|58130908|58132807|58132931	0.075	ENSG00000136068|FLNB|chr3|+|SE|58131926|58132019|58130740|58130908|58132807|58132931_UP
ENSG00000127054|INTS11|chr1|-|RI|1320455|1321093|1320455|1320529|1320995|1321093	0.075	ENSG00000127054|INTS11|chr1|-|RI|1320455|1321093|1320455|1320529|1320995|1321093_UP
ENSG00000132326|PER2|chr2|-|SE|238262951|238263058|238262190|238262344|238265511|238265590	0.075	ENSG00000132326|PER2|chr2|-|SE|238262951|238263058|238262190|238262344|238265511|238265590_UP
ENSG00000136147|PHF11|chr13|+|SE|49497055|49497217|49495983|49496095|49506634|49506756	0.075	ENSG00000136147|PHF11|chr13|+|SE|49497055|49497217|49495983|49496095|49506634|49506756_UP
ENSG00000007541|PIGQ|chr16|+|SE|581198|581341|580857|580972|582247|582309	0.075	ENSG00000007541|PIGQ|chr16|+|SE|581198|581341|580857|580972|582247|582309_UP
ENSG00000184381|PLA2G6|chr22|-|SE|38128268|38128430|38126370|38126449|38129453|38129562	0.075	ENSG00000184381|PLA2G6|chr22|-|SE|38128268|38128430|38126370|38126449|38129453|38129562_UP
ENSG00000167272|POP5|chr12|-|A5SS|120580995|120581257|120581114|120581257|120579773|120579923	0.075	ENSG00000167272|POP5|chr12|-|A5SS|120580995|120581257|120581114|120581257|120579773|120579923_UP
ENSG00000159496|RGL4|chr22|+|RI|23698554|23698978|23698554|23698645|23698843|23698978	0.075	ENSG00000159496|RGL4|chr22|+|RI|23698554|23698978|23698554|23698645|23698843|23698978_UP
ENSG00000184470|TXNRD2|chr22|-|RI|19875521|19877234|19875521|19875807|19877039|19877234	0.075	ENSG00000184470|TXNRD2|chr22|-|RI|19875521|19877234|19875521|19875807|19877039|19877234_UP
ENSG00000109445|ZNF330|chr4|+|A5SS|141220929|141221077|141220929|141221016|141222365|141222491	0.075	ENSG00000109445|ZNF330|chr4|+|A5SS|141220929|141221077|141220929|141221016|141222365|141222491_UP
ENSG00000102984|ZNF821|chr16|-|SE|71861775|71861942|71859679|71860672|71864137|71864242	0.075	ENSG00000102984|ZNF821|chr16|-|SE|71861775|71861942|71859679|71860672|71864137|71864242_UP
ENSG00000153207|AHCTF1|chr1|-|SE|246851904|246852038|246849870|246851442|246853090|246853299	0.076	ENSG00000153207|AHCTF1|chr1|-|SE|246851904|246852038|246849870|246851442|246853090|246853299_UP
ENSG00000085224|ATRX|chrX|-|SE|77595711|77595785|77593695|77593849|77599410|77599580	0.076	ENSG00000085224|ATRX|chrX|-|SE|77595711|77595785|77593695|77593849|77599410|77599580_UP
ENSG00000175826|CTDNEP1|chr17|-|RI|7243590|7244245|7243590|7243951|7244188|7244245	0.076	ENSG00000175826|CTDNEP1|chr17|-|RI|7243590|7244245|7243590|7243951|7244188|7244245_UP
ENSG00000160818|GPATCH4|chr1|-|RI|156596080|156596478|156596080|156596131|156596386|156596478	0.076	ENSG00000160818|GPATCH4|chr1|-|RI|156596080|156596478|156596080|156596131|156596386|156596478_UP
ENSG00000100889|PCK2|chr14|+|SE|24094765|24094845|24094280|24094434|24096891|24097137	0.076	ENSG00000100889|PCK2|chr14|+|SE|24094765|24094845|24094280|24094434|24096891|24097137_UP
ENSG00000183527|PSMG1|chr21|-|SE|39179923|39179986|39178448|39178647|39180284|39180436	0.076	ENSG00000183527|PSMG1|chr21|-|SE|39179923|39179986|39178448|39178647|39180284|39180436_UP
ENSG00000167578|RAB4B|chr19|+|RI|40780018|40780499|40780018|40780099|40780384|40780499	0.076	ENSG00000167578|RAB4B|chr19|+|RI|40780018|40780499|40780018|40780099|40780384|40780499_UP
ENSG00000183597|TANGO2|chr22|+|MXE|20053436|20053551|20061529|20061683|20052464|20052584|20063337|20063442	0.076	ENSG00000183597|TANGO2|chr22|+|MXE|20053436|20053551|20061529|20061683|20052464|20052584|20063337|20063442_UP
ENSG00000064115|TM7SF3|chr12|-|SE|26983492|26983596|26982772|26982859|26990449|26990627	0.076	ENSG00000064115|TM7SF3|chr12|-|SE|26983492|26983596|26982772|26982859|26990449|26990627_UP
ENSG00000175274|TP53I11|chr11|-|SE|44939165|44939281|44938206|44938366|44950676|44950894	0.076	ENSG00000175274|TP53I11|chr11|-|SE|44939165|44939281|44938206|44938366|44950676|44950894_UP
ENSG00000196998|WDR45|chrX|-|MXE|49076644|49076750|49077642|49077747|49076429|49076524|49077836|49077911	0.076	ENSG00000196998|WDR45|chrX|-|MXE|49076644|49076750|49077642|49077747|49076429|49076524|49077836|49077911_UP
ENSG00000076924|XAB2|chr19|-|RI|7625879|7626270|7625879|7626044|7626135|7626270	0.076	ENSG00000076924|XAB2|chr19|-|RI|7625879|7626270|7625879|7626044|7626135|7626270_UP
ENSG00000283189|AC104452.1|chr3|-|RI|49419709|49420342|49419709|49419788|49420210|49420342	0.077	ENSG00000283189|AC104452.1|chr3|-|RI|49419709|49420342|49419709|49419788|49420210|49420342_UP
ENSG00000072818|ACAP1|chr17|+|SE|7337262|7337369|7336579|7336787|7341947|7342067	0.077	ENSG00000072818|ACAP1|chr17|+|SE|7337262|7337369|7336579|7336787|7341947|7342067_UP
ENSG00000196839|ADA|chr20|-|A3SS|44622828|44623078|44622828|44622930|44624201|44624329	0.077	ENSG00000196839|ADA|chr20|-|A3SS|44622828|44623078|44622828|44622930|44624201|44624329_UP
ENSG00000198520|ARMH1|chr1|+|RI|44724319|44724668|44724319|44724392|44724538|44724668	0.077	ENSG00000198520|ARMH1|chr1|+|RI|44724319|44724668|44724319|44724392|44724538|44724668_UP
ENSG00000119723|COQ6|chr14|+|A5SS|73950309|73950597|73950309|73950495|73953434|73953569	0.077	ENSG00000119723|COQ6|chr14|+|A5SS|73950309|73950597|73950309|73950495|73953434|73953569_UP
ENSG00000178950|GAK|chr4|-|RI|850935|851974|850935|851084|851749|851974	0.077	ENSG00000178950|GAK|chr4|-|RI|850935|851974|850935|851084|851749|851974_UP
ENSG00000234741|GAS5|chr1|-|A5SS|173864483|173864704|173864674|173864704|173864256|173864304	0.077	ENSG00000234741|GAS5|chr1|-|A5SS|173864483|173864704|173864674|173864704|173864256|173864304_UP
ENSG00000198715|GLMP|chr1|-|SE|156293319|156293576|156292686|156293209|156294017|156294236	0.077	ENSG00000198715|GLMP|chr1|-|SE|156293319|156293576|156292686|156293209|156294017|156294236_UP
ENSG00000136003|ISCU|chr12|+|RI|108564059|108564392|108564059|108564155|108564278|108564392	0.077	ENSG00000136003|ISCU|chr12|+|RI|108564059|108564392|108564059|108564155|108564278|108564392_UP
ENSG00000137177|KIF13A|chr6|-|SE|17771113|17771218|17763692|17764946|17771907|17772059	0.077	ENSG00000137177|KIF13A|chr6|-|SE|17771113|17771218|17763692|17764946|17771907|17772059_UP
ENSG00000134333|LDHA|chr11|+|MXE|18399430|18399548|18400836|18401010|18396818|18396968|18402839|18403013	0.077	ENSG00000134333|LDHA|chr11|+|MXE|18399430|18399548|18400836|18401010|18396818|18396968|18402839|18403013_UP
ENSG00000140400|MAN2C1|chr15|-|SE|75363209|75363290|75362641|75362748|75363998|75364188	0.077	ENSG00000140400|MAN2C1|chr15|-|SE|75363209|75363290|75362641|75362748|75363998|75364188_UP
ENSG00000125952|MAX|chr14|-|SE|65077327|65077428|65075123|65076663|65077912|65078036	0.077	ENSG00000125952|MAX|chr14|-|SE|65077327|65077428|65075123|65076663|65077912|65078036_UP
ENSG00000112282|MED23|chr6|-|RI|131592387|131593171|131592387|131592460|131593005|131593171	0.077	ENSG00000112282|MED23|chr6|-|RI|131592387|131593171|131592387|131592460|131593005|131593171_UP
ENSG00000161013|MGAT4B|chr5|-|RI|179801333|179801694|179801333|179801467|179801553|179801694	0.077	ENSG00000161013|MGAT4B|chr5|-|RI|179801333|179801694|179801333|179801467|179801553|179801694_UP
ENSG00000148773|MKI67|chr10|-|SE|128114927|128116007|128113426|128113602|128116490|128116536	0.077	ENSG00000148773|MKI67|chr10|-|SE|128114927|128116007|128113426|128113602|128116490|128116536_UP
ENSG00000196498|NCOR2|chr12|-|SE|124340601|124340751|124340293|124340443|124341822|124342074	0.077	ENSG00000196498|NCOR2|chr12|-|SE|124340601|124340751|124340293|124340443|124341822|124342074_UP
ENSG00000177463|NR2C2|chr3|+|RI|15037999|15039227|15037999|15038137|15039121|15039227	0.077	ENSG00000177463|NR2C2|chr3|+|RI|15037999|15039227|15037999|15038137|15039121|15039227_UP
ENSG00000106459|NRF1|chr7|+|SE|129630077|129630168|129611738|129611824|129657342|129657574	0.077	ENSG00000106459|NRF1|chr7|+|SE|129630077|129630168|129611738|129611824|129657342|129657574_UP
ENSG00000175166|PSMD2|chr3|+|A3SS|184301770|184302071|184301846|184302071|184301536|184301658	0.077	ENSG00000175166|PSMD2|chr3|+|A3SS|184301770|184302071|184301846|184302071|184301536|184301658_UP
ENSG00000120833|SOCS2|chr12|+|RI|93572684|93576206|93572684|93573036|93574721|93576206	0.077	ENSG00000120833|SOCS2|chr12|+|RI|93572684|93576206|93572684|93573036|93574721|93576206_UP
ENSG00000054611|TBC1D22A|chr22|+|MXE|46797443|46797620|46878652|46878723|46793500|46793841|46891265|46891394	0.077	ENSG00000054611|TBC1D22A|chr22|+|MXE|46797443|46797620|46878652|46878723|46793500|46793841|46891265|46891394_UP
ENSG00000151239|TWF1|chr12|-|SE|43805830|43805885|43804494|43804572|43806220|43806287	0.077	ENSG00000151239|TWF1|chr12|-|SE|43805830|43805885|43804494|43804572|43806220|43806287_UP
ENSG00000196998|WDR45|chrX|-|MXE|49076644|49076753|49077642|49077747|49076429|49076524|49077836|49077911	0.077	ENSG00000196998|WDR45|chrX|-|MXE|49076644|49076753|49077642|49077747|49076429|49076524|49077836|49077911_UP
ENSG00000133316|WDR74|chr11|-|RI|62833617|62833937|62833617|62833674|62833791|62833937	0.077	ENSG00000133316|WDR74|chr11|-|RI|62833617|62833937|62833617|62833674|62833791|62833937_UP
ENSG00000176261|ZBTB8OS|chr1|-|A3SS|32633950|32634110|32633950|32634072|32634767|32634792	0.077	ENSG00000176261|ZBTB8OS|chr1|-|A3SS|32633950|32634110|32633950|32634072|32634767|32634792_UP
ENSG00000221978|CCNL2|chr1|-|SE|1388949|1389047|1388625|1388743|1390229|1390371	0.078	ENSG00000221978|CCNL2|chr1|-|SE|1388949|1389047|1388625|1388743|1390229|1390371_UP
ENSG00000131187|F12|chr5|-|RI|177403480|177404090|177403480|177403617|177403858|177404090	0.078	ENSG00000131187|F12|chr5|-|RI|177403480|177404090|177403480|177403617|177403858|177404090_UP
ENSG00000170271|FAXDC2|chr5|-|SE|154830800|154830922|154823307|154823592|154834624|154834728	0.078	ENSG00000170271|FAXDC2|chr5|-|SE|154830800|154830922|154823307|154823592|154834624|154834728_UP
ENSG00000169660|HEXD|chr17|+|RI|82436666|82437363|82436666|82436738|82437167|82437363	0.078	ENSG00000169660|HEXD|chr17|+|RI|82436666|82437363|82436666|82436738|82437167|82437363_UP
ENSG00000135838|NPL|chr1|+|SE|182795729|182795840|182794355|182794439|182803697|182803771	0.078	ENSG00000135838|NPL|chr1|+|SE|182795729|182795840|182794355|182794439|182803697|182803771_UP
ENSG00000180530|NRIP1|chr21|-|SE|15014343|15014466|14961234|14968526|15043494|15043574	0.078	ENSG00000180530|NRIP1|chr21|-|SE|15014343|15014466|14961234|14968526|15043494|15043574_UP
ENSG00000143851|PTPN7|chr1|-|A3SS|202158117|202158320|202158117|202158301|202159280|202159454	0.078	ENSG00000143851|PTPN7|chr1|-|A3SS|202158117|202158320|202158117|202158301|202159280|202159454_UP
ENSG00000127328|RAB3IP|chr12|+|A3SS|69812777|69813033|69812963|69813033|69801608|69801721	0.078	ENSG00000127328|RAB3IP|chr12|+|A3SS|69812777|69813033|69812963|69813033|69801608|69801721_UP
ENSG00000185379|RAD51D|chr17|-|MXE|35107365|35107447|35116858|35117037|35106440|35106481|35118500|35118619	0.078	ENSG00000185379|RAD51D|chr17|-|MXE|35107365|35107447|35116858|35117037|35106440|35106481|35118500|35118619_UP
ENSG00000160961|ZNF333|chr19|+|SE|14701583|14701897|14699198|14699281|14705053|14705170	0.078	ENSG00000160961|ZNF333|chr19|+|SE|14701583|14701897|14699198|14699281|14705053|14705170_UP
ENSG00000176731|C8orf59|chr8|-|SE|85214920|85215037|85214075|85214631|85217385|85217502	0.079	ENSG00000176731|C8orf59|chr8|-|SE|85214920|85215037|85214075|85214631|85217385|85217502_UP
ENSG00000015133|CCDC88C|chr14|-|SE|91281161|91281308|91279237|91279306|91281456|91281525	0.079	ENSG00000015133|CCDC88C|chr14|-|SE|91281161|91281308|91279237|91279306|91281456|91281525_UP
ENSG00000111596|CNOT2|chr12|+|SE|70294236|70294294|70278131|70278274|70310894|70311017	0.079	ENSG00000111596|CNOT2|chr12|+|SE|70294236|70294294|70278131|70278274|70310894|70311017_UP
ENSG00000127084|FGD3|chr9|+|RI|93032768|93034681|93032768|93032873|93034540|93034681	0.079	ENSG00000127084|FGD3|chr9|+|RI|93032768|93034681|93032768|93032873|93034540|93034681_UP
ENSG00000121897|LIAS|chr4|+|A5SS|39467517|39468427|39467517|39467646|39470018|39470164	0.079	ENSG00000121897|LIAS|chr4|+|A5SS|39467517|39468427|39467517|39467646|39470018|39470164_UP
ENSG00000135679|MDM2|chr12|+|SE|68816811|68816945|68813553|68813628|68820324|68820374	0.079	ENSG00000135679|MDM2|chr12|+|SE|68816811|68816945|68813553|68813628|68820324|68820374_UP
ENSG00000059588|TARBP1|chr1|-|MXE|234398381|234398553|234400852|234400948|234393645|234393837|234401180|234401262	0.079	ENSG00000059588|TARBP1|chr1|-|MXE|234398381|234398553|234400852|234400948|234393645|234393837|234401180|234401262_UP
ENSG00000100575|TIMM9|chr14|-|SE|58411906|58411971|58410842|58410938|58424007|58424095	0.079	ENSG00000100575|TIMM9|chr14|-|SE|58411906|58411971|58410842|58410938|58424007|58424095_UP
ENSG00000179029|TMEM107|chr17|-|RI|8175756|8176026|8175756|8175857|8175958|8176026	0.079	ENSG00000179029|TMEM107|chr17|-|RI|8175756|8176026|8175756|8175857|8175958|8176026_UP
ENSG00000005889|ZFX|chrX|+|SE|24152719|24152830|24149728|24149794|24172714|24172800	0.079	ENSG00000005889|ZFX|chrX|+|SE|24152719|24152830|24149728|24149794|24172714|24172800_UP
ENSG00000197343|ZNF655|chr7|+|SE|99563187|99563266|99562343|99562494|99563862|99564686	0.079	ENSG00000197343|ZNF655|chr7|+|SE|99563187|99563266|99562343|99562494|99563862|99564686_UP
ENSG00000179869|ABCA13|chr7|+|SE|48466955|48467045|48455036|48455286|48471529|48471599	0.08	ENSG00000179869|ABCA13|chr7|+|SE|48466955|48467045|48455036|48455286|48471529|48471599_UP
ENSG00000105483|CARD8|chr19|-|SE|48242539|48242644|48240961|48241063|48249522|48249633	0.08	ENSG00000105483|CARD8|chr19|-|SE|48242539|48242644|48240961|48241063|48249522|48249633_UP
ENSG00000198612|COPS8|chr2|+|SE|237087463|237087563|237087126|237087197|237088604|237088653	0.08	ENSG00000198612|COPS8|chr2|+|SE|237087463|237087563|237087126|237087197|237088604|237088653_UP
ENSG00000064763|FAR2|chr12|+|SE|29332844|29332908|29332687|29332727|29333631|29334072	0.08	ENSG00000064763|FAR2|chr12|+|SE|29332844|29332908|29332687|29332727|29333631|29334072_UP
ENSG00000166225|FRS2|chr12|+|SE|69537915|69537983|69532013|69532056|69562179|69562274	0.08	ENSG00000166225|FRS2|chr12|+|SE|69537915|69537983|69532013|69532056|69562179|69562274_UP
ENSG00000142856|ITGB3BP|chr1|-|SE|63510064|63510181|63508527|63508570|63523128|63523194	0.08	ENSG00000142856|ITGB3BP|chr1|-|SE|63510064|63510181|63508527|63508570|63523128|63523194_UP
ENSG00000109736|MFSD10|chr4|-|RI|2931374|2931936|2931374|2931465|2931824|2931936	0.08	ENSG00000109736|MFSD10|chr4|-|RI|2931374|2931936|2931374|2931465|2931824|2931936_UP
ENSG00000101158|NELFCD|chr20|+|RI|58988913|58989640|58988913|58989021|58989487|58989640	0.08	ENSG00000101158|NELFCD|chr20|+|RI|58988913|58989640|58988913|58989021|58989487|58989640_UP
ENSG00000165195|PIGA|chrX|-|RI|15324664|15325152|15324664|15324871|15325019|15325152	0.08	ENSG00000165195|PIGA|chrX|-|RI|15324664|15325152|15324664|15324871|15325019|15325152_UP
ENSG00000185808|PIGP|chr21|-|SE|37072144|37072310|37069551|37069624|37072433|37072537	0.08	ENSG00000185808|PIGP|chr21|-|SE|37072144|37072310|37069551|37069624|37072433|37072537_UP
ENSG00000188529|SRSF10|chr1|-|SE|23971572|23971623|23966444|23967723|23971849|23972012	0.08	ENSG00000188529|SRSF10|chr1|-|SE|23971572|23971623|23966444|23967723|23971849|23972012_UP
ENSG00000204387|C6orf48|chr6|+|A5SS|31834907|31835200|31834907|31835057|31835410|31835451	0.081	ENSG00000204387|C6orf48|chr6|+|A5SS|31834907|31835200|31834907|31835057|31835410|31835451_UP
ENSG00000092529|CAPN3|chr15|+|A3SS|42411746|42412317|42412085|42412317|42411286|42411345	0.081	ENSG00000092529|CAPN3|chr15|+|A3SS|42411746|42412317|42412085|42412317|42411286|42411345_UP
ENSG00000185000|DGAT1|chr8|-|RI|144317021|144317252|144317021|144317109|144317186|144317252	0.081	ENSG00000185000|DGAT1|chr8|-|RI|144317021|144317252|144317021|144317109|144317186|144317252_UP
ENSG00000168522|FNTA|chr8|+|A5SS|43077215|43080441|43077215|43077364|43083117|43083180	0.081	ENSG00000168522|FNTA|chr8|+|A5SS|43077215|43080441|43077215|43077364|43083117|43083180_UP
ENSG00000125952|MAX|chr14|-|SE|65077343|65077428|65075126|65076663|65077912|65078036	0.081	ENSG00000125952|MAX|chr14|-|SE|65077343|65077428|65075126|65076663|65077912|65078036_UP
ENSG00000129460|NGDN|chr14|+|RI|23477199|23477560|23477199|23477356|23477502|23477560	0.081	ENSG00000129460|NGDN|chr14|+|RI|23477199|23477560|23477199|23477356|23477502|23477560_UP
ENSG00000163864|NMNAT3|chr3|-|SE|139572106|139572233|139560222|139561392|139573597|139573680	0.081	ENSG00000163864|NMNAT3|chr3|-|SE|139572106|139572233|139560222|139561392|139573597|139573680_UP
ENSG00000151665|PIGF|chr2|-|SE|46588074|46588179|46581284|46581591|46592474|46592583	0.081	ENSG00000151665|PIGF|chr2|-|SE|46588074|46588179|46581284|46581591|46592474|46592583_UP
ENSG00000143442|POGZ|chr1|-|SE|151440927|151441086|151430665|151430841|151442080|151442205	0.081	ENSG00000143442|POGZ|chr1|-|SE|151440927|151441086|151430665|151430841|151442080|151442205_UP
ENSG00000073584|SMARCE1|chr17|-|MXE|40642454|40642559|40645795|40645847|40637491|40637572|40647772|40647839	0.081	ENSG00000073584|SMARCE1|chr17|-|MXE|40642454|40642559|40645795|40645847|40637491|40637572|40647772|40647839_UP
ENSG00000198742|SMURF1|chr7|-|SE|99050914|99050992|99049562|99049709|99051356|99051441	0.081	ENSG00000198742|SMURF1|chr7|-|SE|99050914|99050992|99049562|99049709|99051356|99051441_UP
ENSG00000112715|VEGFA|chr6|+|SE|43781955|43782087|43778888|43778918|43784540|43784562	0.081	ENSG00000112715|VEGFA|chr6|+|SE|43781955|43782087|43778888|43778918|43784540|43784562_UP
ENSG00000133641|C12orf29|chr12|+|SE|88040147|88040265|88035445|88035738|88042824|88042920	0.082	ENSG00000133641|C12orf29|chr12|+|SE|88040147|88040265|88035445|88035738|88042824|88042920_UP
ENSG00000187796|CARD9|chr9|-|RI|136367215|136367976|136367215|136367257|136367636|136367976	0.082	ENSG00000187796|CARD9|chr9|-|RI|136367215|136367976|136367215|136367257|136367636|136367976_UP
ENSG00000115355|CCDC88A|chr2|-|RI|55299838|55301277|55299838|55299919|55301205|55301277	0.082	ENSG00000115355|CCDC88A|chr2|-|RI|55299838|55301277|55299838|55299919|55301205|55301277_UP
ENSG00000221978|CCNL2|chr1|-|MXE|1388625|1388743|1388949|1389047|1387953|1388065|1390229|1390371	0.082	ENSG00000221978|CCNL2|chr1|-|MXE|1388625|1388743|1388949|1389047|1387953|1388065|1390229|1390371_UP
ENSG00000115548|KDM3A|chr2|+|RI|86478607|86480362|86478607|86478735|86480166|86480362	0.082	ENSG00000115548|KDM3A|chr2|+|RI|86478607|86480362|86478607|86478735|86480166|86480362_UP
ENSG00000165609|NUDT5|chr10|-|RI|12170716|12170908|12170716|12170770|12170899|12170908	0.082	ENSG00000165609|NUDT5|chr10|-|RI|12170716|12170908|12170716|12170770|12170899|12170908_UP
ENSG00000187514|PTMA|chr2|+|RI|231711347|231711983|231711347|231711419|231711886|231711983	0.082	ENSG00000187514|PTMA|chr2|+|RI|231711347|231711983|231711347|231711419|231711886|231711983_UP
ENSG00000004809|SLC22A16|chr6|-|A3SS|110424686|110425382|110424686|110425085|110431170|110431270	0.082	ENSG00000004809|SLC22A16|chr6|-|A3SS|110424686|110425382|110424686|110425085|110431170|110431270_UP
ENSG00000150433|TMEM218|chr11|-|A3SS|125101200|125101303|125101200|125101256|125102131|125102317	0.082	ENSG00000150433|TMEM218|chr11|-|A3SS|125101200|125101303|125101200|125101256|125102131|125102317_UP
ENSG00000186815|TPCN1|chr12|+|SE|113284717|113284771|113284580|113284637|113285888|113285961	0.082	ENSG00000186815|TPCN1|chr12|+|SE|113284717|113284771|113284580|113284637|113285888|113285961_UP
ENSG00000144357|UBR3|chr2|+|SE|170014814|170014865|170008803|170008940|170015280|170015366	0.082	ENSG00000144357|UBR3|chr2|+|SE|170014814|170014865|170008803|170008940|170015280|170015366_UP
ENSG00000162300|ZFPL1|chr11|+|RI|65085114|65086608|65085114|65085226|65086414|65086608	0.082	ENSG00000162300|ZFPL1|chr11|+|RI|65085114|65086608|65085114|65085226|65086414|65086608_UP
ENSG00000165233|CARD19|chr9|+|RI|93110567|93112289|93110567|93110721|93112217|93112289	0.083	ENSG00000165233|CARD19|chr9|+|RI|93110567|93112289|93110567|93110721|93112217|93112289_UP
ENSG00000067064|IDI1|chr10|-|RI|1043300|1044171|1043300|1043393|1043998|1044171	0.083	ENSG00000067064|IDI1|chr10|-|RI|1043300|1044171|1043300|1043393|1043998|1044171_UP
ENSG00000267796|LIN37|chr19|+|RI|35754245|35754519|35754245|35754319|35754392|35754519	0.083	ENSG00000267796|LIN37|chr19|+|RI|35754245|35754519|35754245|35754319|35754392|35754519_UP
ENSG00000100258|LMF2|chr22|-|RI|50504339|50504727|50504339|50504451|50504558|50504727	0.083	ENSG00000100258|LMF2|chr22|-|RI|50504339|50504727|50504339|50504451|50504558|50504727_UP
ENSG00000116604|MEF2D|chr1|-|SE|156475107|156475237|156468779|156469020|156477011|156477202	0.083	ENSG00000116604|MEF2D|chr1|-|SE|156475107|156475237|156468779|156469020|156477011|156477202_UP
ENSG00000074356|NCBP3|chr17|-|SE|3824059|3824092|3821952|3822052|3824941|3825021	0.083	ENSG00000074356|NCBP3|chr17|-|SE|3824059|3824092|3821952|3822052|3824941|3825021_UP
ENSG00000120913|PDLIM2|chr8|+|A5SS|22579129|22579527|22579129|22579209|22580602|22580697	0.083	ENSG00000120913|PDLIM2|chr8|+|A5SS|22579129|22579527|22579129|22579209|22580602|22580697_UP
ENSG00000033800|PIAS1|chr15|+|SE|68183629|68183667|68181211|68181354|68187541|68188064	0.083	ENSG00000033800|PIAS1|chr15|+|SE|68183629|68183667|68181211|68181354|68187541|68188064_UP
ENSG00000153914|SREK1|chr5|+|RI|66162413|66163922|66162413|66162592|66163791|66163922	0.083	ENSG00000153914|SREK1|chr5|+|RI|66162413|66163922|66162413|66162592|66163791|66163922_UP
ENSG00000100650|SRSF5|chr14|+|RI|69768797|69769251|69768797|69768896|69769181|69769251	0.083	ENSG00000100650|SRSF5|chr14|+|RI|69768797|69769251|69768797|69768896|69769181|69769251_UP
ENSG00000143258|USP21|chr1|+|A5SS|161163877|161163981|161163877|161163922|161164163|161164250	0.083	ENSG00000143258|USP21|chr1|+|A5SS|161163877|161163981|161163877|161163922|161164163|161164250_UP
ENSG00000177082|WDR73|chr15|-|RI|84647889|84648625|84647889|84647954|84648536|84648625	0.083	ENSG00000177082|WDR73|chr15|-|RI|84647889|84648625|84647889|84647954|84648536|84648625_UP
ENSG00000160058|BSDC1|chr1|-|MXE|32383829|32383939|32386778|32386895|32381213|32381268|32394079|32394140	0.084	ENSG00000160058|BSDC1|chr1|-|MXE|32383829|32383939|32386778|32386895|32381213|32381268|32394079|32394140_UP
ENSG00000160058|BSDC1|chr1|-|MXE|32383829|32383997|32386778|32386895|32381213|32381268|32394079|32394140	0.084	ENSG00000160058|BSDC1|chr1|-|MXE|32383829|32383997|32386778|32386895|32381213|32381268|32394079|32394140_UP
ENSG00000198286|CARD11|chr7|-|SE|2980519|2980580|2958499|2958631|3043666|3043845	0.084	ENSG00000198286|CARD11|chr7|-|SE|2980519|2980580|2958499|2958631|3043666|3043845_UP
ENSG00000258890|CEP95|chr17|+|RI|64534584|64536748|64534584|64534737|64536601|64536748	0.084	ENSG00000258890|CEP95|chr17|+|RI|64534584|64536748|64534584|64534737|64536601|64536748_UP
ENSG00000179335|CLK3|chr15|+|RI|74622119|74622560|74622119|74622216|74622493|74622560	0.084	ENSG00000179335|CLK3|chr15|+|RI|74622119|74622560|74622119|74622216|74622493|74622560_UP
ENSG00000198837|DENND4B|chr1|-|SE|153942186|153942356|153941868|153942113|153942555|153942625	0.084	ENSG00000198837|DENND4B|chr1|-|SE|153942186|153942356|153941868|153942113|153942555|153942625_UP
ENSG00000132768|DPH2|chr1|+|A3SS|43970905|43971189|43970965|43971189|43970595|43970708	0.084	ENSG00000132768|DPH2|chr1|+|A3SS|43970905|43971189|43970965|43971189|43970595|43970708_UP
ENSG00000109323|MANBA|chr4|-|SE|102679610|102679709|102673918|102674070|102689573|102689684	0.084	ENSG00000109323|MANBA|chr4|-|SE|102679610|102679709|102673918|102674070|102689573|102689684_UP
ENSG00000131446|MGAT1|chr5|-|SE|180795837|180795875|180792372|180793097|180802679|180802794	0.084	ENSG00000131446|MGAT1|chr5|-|SE|180795837|180795875|180792372|180793097|180802679|180802794_UP
ENSG00000135241|PNPLA8|chr7|-|A3SS|108514435|108515574|108514435|108515447|108521475|108521521	0.084	ENSG00000135241|PNPLA8|chr7|-|A3SS|108514435|108515574|108514435|108515447|108521475|108521521_UP
ENSG00000173933|RBM4|chr11|+|SE|66643449|66644140|66638934|66640123|66646026|66646452	0.084	ENSG00000173933|RBM4|chr11|+|SE|66643449|66644140|66638934|66640123|66646026|66646452_UP
ENSG00000006015|REX1BD|chr19|+|RI|18588994|18589683|18588994|18589077|18589412|18589683	0.084	ENSG00000006015|REX1BD|chr19|+|RI|18588994|18589683|18588994|18589077|18589412|18589683_UP
ENSG00000174365|SNHG11|chr20|+|RI|38450261|38450921|38450261|38450447|38450532|38450921	0.084	ENSG00000174365|SNHG11|chr20|+|RI|38450261|38450921|38450261|38450447|38450532|38450921_UP
ENSG00000090372|STRN4|chr19|-|A3SS|46727451|46727691|46727451|46727567|46727893|46728007	0.084	ENSG00000090372|STRN4|chr19|-|A3SS|46727451|46727691|46727451|46727567|46727893|46728007_UP
ENSG00000110719|TCIRG1|chr11|+|SE|68039791|68039962|68039105|68039119|68041267|68041388	0.084	ENSG00000110719|TCIRG1|chr11|+|SE|68039791|68039962|68039105|68039119|68041267|68041388_UP
ENSG00000160087|UBE2J2|chr1|-|SE|1267861|1267992|1262852|1263386|1273665|1273833	0.084	ENSG00000160087|UBE2J2|chr1|-|SE|1267861|1267992|1262852|1263386|1273665|1273833_UP
ENSG00000276644|DACH1|chr13|-|SE|71573417|71573573|71572839|71573012|71630555|71630717	0.085	ENSG00000276644|DACH1|chr13|-|SE|71573417|71573573|71572839|71573012|71630555|71630717_UP
ENSG00000104129|DNAJC17|chr15|-|A3SS|40776195|40776401|40776195|40776292|40776541|40776627	0.085	ENSG00000104129|DNAJC17|chr15|-|A3SS|40776195|40776401|40776195|40776292|40776541|40776627_UP
ENSG00000174371|EXO1|chr1|+|SE|241849111|241849216|241848730|241849027|241850408|241850586	0.085	ENSG00000174371|EXO1|chr1|+|SE|241849111|241849216|241848730|241849027|241850408|241850586_UP
ENSG00000115271|GCA|chr2|+|RI|162359043|162359552|162359043|162359157|162359493|162359552	0.085	ENSG00000115271|GCA|chr2|+|RI|162359043|162359552|162359043|162359157|162359493|162359552_UP
ENSG00000167548|KMT2D|chr12|-|SE|49024052|49024100|49022589|49022875|49024577|49024624	0.085	ENSG00000167548|KMT2D|chr12|-|SE|49024052|49024100|49022589|49022875|49024577|49024624_UP
ENSG00000071054|MAP4K4|chr2|+|SE|101871493|101871685|101870294|101870415|101873646|101873764	0.085	ENSG00000071054|MAP4K4|chr2|+|SE|101871493|101871685|101870294|101870415|101873646|101873764_UP
ENSG00000134986|NREP|chr5|-|SE|111755769|111755926|111735429|111735507|111757135|111757179	0.085	ENSG00000134986|NREP|chr5|-|SE|111755769|111755926|111735429|111735507|111757135|111757179_UP
ENSG00000183597|TANGO2|chr22|+|MXE|20055942|20056013|20061529|20061683|20052464|20052584|20063337|20063442	0.085	ENSG00000183597|TANGO2|chr22|+|MXE|20055942|20056013|20061529|20061683|20052464|20052584|20063337|20063442_UP
ENSG00000160055|TMEM234|chr1|-|SE|32217436|32217577|32217258|32217351|32221130|32221197	0.085	ENSG00000160055|TMEM234|chr1|-|SE|32217436|32217577|32217258|32217351|32221130|32221197_UP
ENSG00000160948|VPS28|chr8|-|RI|144424945|144425772|144424945|144425051|144425682|144425772	0.085	ENSG00000160948|VPS28|chr8|-|RI|144424945|144425772|144424945|144425051|144425682|144425772_UP
ENSG00000146192|FGD2|chr6|+|RI|37027428|37029069|37027428|37027575|37027947|37029069	0.086	ENSG00000146192|FGD2|chr6|+|RI|37027428|37029069|37027428|37027575|37027947|37029069_UP
ENSG00000100938|GMPR2|chr14|+|SE|24238245|24238405|24237519|24237562|24238588|24238748	0.086	ENSG00000100938|GMPR2|chr14|+|SE|24238245|24238405|24237519|24237562|24238588|24238748_UP
ENSG00000160818|GPATCH4|chr1|-|SE|156598034|156598121|156596293|156596478|156598226|156598319	0.086	ENSG00000160818|GPATCH4|chr1|-|SE|156598034|156598121|156596293|156596478|156598226|156598319_UP
ENSG00000061273|HDAC7|chr12|-|A3SS|47791870|47792669|47791870|47792004|47793368|47793588	0.086	ENSG00000061273|HDAC7|chr12|-|A3SS|47791870|47792669|47791870|47792004|47793368|47793588_UP
ENSG00000051108|HERPUD1|chr16|+|SE|56935403|56935475|56935234|56935312|56936686|56936817	0.086	ENSG00000051108|HERPUD1|chr16|+|SE|56935403|56935475|56935234|56935312|56936686|56936817_UP
ENSG00000125538|IL1B|chr2|-|RI|112836182|112836779|112836182|112836244|112836707|112836779	0.086	ENSG00000125538|IL1B|chr2|-|RI|112836182|112836779|112836182|112836244|112836707|112836779_UP
ENSG00000125458|NT5C|chr17|-|A5SS|75130964|75131105|75131044|75131105|75130752|75130867	0.086	ENSG00000125458|NT5C|chr17|-|A5SS|75130964|75131105|75131044|75131105|75130752|75130867_UP
ENSG00000092108|SCFD1|chr14|+|SE|30628208|30628279|30622111|30622399|30630476|30630565	0.086	ENSG00000092108|SCFD1|chr14|+|SE|30628208|30628279|30622111|30622399|30630476|30630565_UP
ENSG00000116754|SRSF11|chr1|+|MXE|70231094|70231203|70231858|70231975|70228421|70228555|70232267|70232377	0.086	ENSG00000116754|SRSF11|chr1|+|MXE|70231094|70231203|70231858|70231975|70228421|70228555|70232267|70232377_UP
ENSG00000140262|TCF12|chr15|+|SE|57252420|57252492|57251168|57251423|57253261|57253468	0.086	ENSG00000140262|TCF12|chr15|+|SE|57252420|57252492|57251168|57251423|57253261|57253468_UP
ENSG00000249790|AC092490.1|chr12|+|SE|8789999|8790263|8788273|8788786|8794304|8794336	0.087	ENSG00000249790|AC092490.1|chr12|+|SE|8789999|8790263|8788273|8788786|8794304|8794336_UP
ENSG00000089820|ARHGAP4|chrX|-|RI|153910170|153910611|153910170|153910404|153910505|153910611	0.087	ENSG00000089820|ARHGAP4|chrX|-|RI|153910170|153910611|153910170|153910404|153910505|153910611_UP
ENSG00000119723|COQ6|chr14|+|RI|73959414|73961375|73959414|73959522|73961172|73961375	0.087	ENSG00000119723|COQ6|chr14|+|RI|73959414|73961375|73959414|73959522|73961172|73961375_UP
ENSG00000111364|DDX55|chr12|+|RI|123607431|123607662|123607431|123607523|123607599|123607662	0.087	ENSG00000111364|DDX55|chr12|+|RI|123607431|123607662|123607431|123607523|123607599|123607662_UP
ENSG00000138646|HERC5|chr4|+|RI|88504231|88504597|88504231|88504415|88504494|88504597	0.087	ENSG00000138646|HERC5|chr4|+|RI|88504231|88504597|88504231|88504415|88504494|88504597_UP
ENSG00000129255|MPDU1|chr17|+|MXE|7586691|7586838|7586898|7587017|7585945|7586078|7587160|7587271	0.087	ENSG00000129255|MPDU1|chr17|+|MXE|7586691|7586838|7586898|7587017|7585945|7586078|7587160|7587271_UP
ENSG00000196712|NF1|chr17|+|SE|31367224|31367278|31360486|31360703|31374012|31374433	0.087	ENSG00000196712|NF1|chr17|+|SE|31367224|31367278|31360486|31360703|31374012|31374433_UP
ENSG00000127419|TMEM175|chr4|+|RI|947708|948154|947708|947892|948115|948154	0.087	ENSG00000127419|TMEM175|chr4|+|RI|947708|948154|947708|947892|948115|948154_UP
ENSG00000112576|CCND3|chr6|-|SE|41936558|41936695|41934932|41936107|41937234|41937394	0.088	ENSG00000112576|CCND3|chr6|-|SE|41936558|41936695|41934932|41936107|41937234|41937394_UP
ENSG00000139734|DIAPH3|chr13|-|SE|60132956|60132989|60112009|60112186|60163586|60163766	0.088	ENSG00000139734|DIAPH3|chr13|-|SE|60132956|60132989|60112009|60112186|60163586|60163766_UP
ENSG00000071889|FAM3A|chrX|-|SE|154507810|154507882|154507405|154507490|154508288|154508347	0.088	ENSG00000071889|FAM3A|chrX|-|SE|154507810|154507882|154507405|154507490|154508288|154508347_UP
ENSG00000125877|ITPA|chr20|+|SE|3213318|3213426|3213168|3213226|3213984|3214058	0.088	ENSG00000125877|ITPA|chr20|+|SE|3213318|3213426|3213168|3213226|3213984|3214058_UP
ENSG00000050748|MAPK9|chr5|-|SE|180279795|180280036|180269279|180269409|180280439|180280581	0.088	ENSG00000050748|MAPK9|chr5|-|SE|180279795|180280036|180269279|180269409|180280439|180280581_UP
ENSG00000167272|POP5|chr12|-|RI|120579513|120579923|120579513|120579597|120579773|120579923	0.088	ENSG00000167272|POP5|chr12|-|RI|120579513|120579923|120579513|120579597|120579773|120579923_UP
ENSG00000175166|PSMD2|chr3|+|RI|184303319|184303749|184303319|184303466|184303642|184303749	0.088	ENSG00000175166|PSMD2|chr3|+|RI|184303319|184303749|184303319|184303466|184303642|184303749_UP
ENSG00000131876|SNRPA1|chr15|-|SE|101287655|101287702|101285725|101287010|101295096|101295203	0.088	ENSG00000131876|SNRPA1|chr15|-|SE|101287655|101287702|101285725|101287010|101295096|101295203_UP
ENSG00000119760|SUPT7L|chr2|-|RI|27660983|27662281|27660983|27661601|27662178|27662281	0.088	ENSG00000119760|SUPT7L|chr2|-|RI|27660983|27662281|27660983|27661601|27662178|27662281_UP
ENSG00000183597|TANGO2|chr22|+|SE|20053436|20053551|20052464|20052584|20061529|20061681	0.088	ENSG00000183597|TANGO2|chr22|+|SE|20053436|20053551|20052464|20052584|20061529|20061681_UP
ENSG00000171204|TMEM126B|chr11|+|MXE|85629131|85629203|85631144|85631316|85628596|85628688|85631686|85631808	0.088	ENSG00000171204|TMEM126B|chr11|+|MXE|85629131|85629203|85631144|85631316|85628596|85628688|85631686|85631808_UP
ENSG00000090905|TNRC6A|chr16|+|A3SS|24805604|24805733|24805673|24805733|24805013|24805151	0.088	ENSG00000090905|TNRC6A|chr16|+|A3SS|24805604|24805733|24805673|24805733|24805013|24805151_UP
ENSG00000136305|CIDEB|chr14|-|SE|24305946|24306137|24305095|24305765|24306373|24306523	0.089	ENSG00000136305|CIDEB|chr14|-|SE|24305946|24306137|24305095|24305765|24306373|24306523_UP
ENSG00000101365|IDH3B|chr20|-|RI|2660456|2660829|2660456|2660590|2660696|2660829	0.089	ENSG00000101365|IDH3B|chr20|-|RI|2660456|2660829|2660456|2660590|2660696|2660829_UP
ENSG00000182979|MTA1|chr14|+|RI|105450057|105450324|105450057|105450184|105450260|105450324	0.089	ENSG00000182979|MTA1|chr14|+|RI|105450057|105450324|105450057|105450184|105450260|105450324_UP
ENSG00000101247|NDUFAF5|chr20|+|SE|13801817|13801873|13801542|13801683|13808841|13808902	0.089	ENSG00000101247|NDUFAF5|chr20|+|SE|13801817|13801873|13801542|13801683|13808841|13808902_UP
ENSG00000100227|POLDIP3|chr22|-|SE|42597672|42597737|42596185|42596365|42599697|42599793	0.089	ENSG00000100227|POLDIP3|chr22|-|SE|42597672|42597737|42596185|42596365|42599697|42599793_UP
ENSG00000168397|ATG4B|chr2|+|SE|241651883|241651974|241651263|241651335|241653306|241653369	0.09	ENSG00000168397|ATG4B|chr2|+|SE|241651883|241651974|241651263|241651335|241653306|241653369_UP
ENSG00000119402|FBXW2|chr9|-|A3SS|120787768|120788278|120787768|120788186|120793148|120793257	0.09	ENSG00000119402|FBXW2|chr9|-|A3SS|120787768|120788278|120787768|120788186|120793148|120793257_UP
ENSG00000175110|MRPS22|chr3|+|RI|139350178|139351060|139350178|139350322|139350976|139351060	0.09	ENSG00000175110|MRPS22|chr3|+|RI|139350178|139351060|139350178|139350322|139350976|139351060_UP
ENSG00000175575|PAAF1|chr11|+|A3SS|73886928|73887099|73887039|73887099|73878778|73878819	0.09	ENSG00000175575|PAAF1|chr11|+|A3SS|73886928|73887099|73887039|73887099|73878778|73878819_UP
ENSG00000075303|SLC25A40|chr7|-|A3SS|87856291|87856389|87856291|87856351|87858630|87858751	0.09	ENSG00000075303|SLC25A40|chr7|-|A3SS|87856291|87856389|87856291|87856351|87858630|87858751_UP
ENSG00000064607|SUGP2|chr19|-|RI|18990887|18993740|18990887|18991149|18993637|18993740	0.09	ENSG00000064607|SUGP2|chr19|-|RI|18990887|18993740|18990887|18991149|18993637|18993740_UP
ENSG00000197343|ZNF655|chr7|+|RI|99561887|99562494|99561887|99561973|99562367|99562494	0.09	ENSG00000197343|ZNF655|chr7|+|RI|99561887|99562494|99561887|99561973|99562367|99562494_UP
ENSG00000023330|ALAS1|chr3|+|SE|52198671|52198848|52198093|52198255|52199209|52199440	0.091	ENSG00000023330|ALAS1|chr3|+|SE|52198671|52198848|52198093|52198255|52199209|52199440_UP
ENSG00000168010|ATG16L2|chr11|+|RI|72822477|72824842|72822477|72822543|72822847|72824842	0.091	ENSG00000168010|ATG16L2|chr11|+|RI|72822477|72824842|72822477|72822543|72822847|72824842_UP
ENSG00000168283|BMI1|chr10|+|RI|22326430|22326986|22326430|22326561|22326889|22326986	0.091	ENSG00000168283|BMI1|chr10|+|RI|22326430|22326986|22326430|22326561|22326889|22326986_UP
ENSG00000182325|FBXL6|chr8|-|RI|144356989|144357502|144356989|144357121|144357456|144357502	0.091	ENSG00000182325|FBXL6|chr8|-|RI|144356989|144357502|144356989|144357121|144357456|144357502_UP
ENSG00000169660|HEXD|chr17|+|SE|82440262|82440334|82439630|82439713|82440996|82441075	0.091	ENSG00000169660|HEXD|chr17|+|SE|82440262|82440334|82439630|82439713|82440996|82441075_UP
ENSG00000169592|INO80E|chr16|+|SE|30001211|30001530|30000928|30001040|30005220|30005323	0.091	ENSG00000169592|INO80E|chr16|+|SE|30001211|30001530|30000928|30001040|30005220|30005323_UP
ENSG00000103202|NME4|chr16|+|RI|398207|399123|398207|398394|398989|399123	0.091	ENSG00000103202|NME4|chr16|+|RI|398207|399123|398207|398394|398989|399123_UP
ENSG00000008710|PKD1|chr16|-|SE|2092953|2093093|2092479|2092592|2093543|2093738	0.091	ENSG00000008710|PKD1|chr16|-|SE|2092953|2093093|2092479|2092592|2093543|2093738_UP
ENSG00000149273|RPS3|chr11|+|MXE|75402351|75402379|75404019|75404207|75401639|75401733|75404671|75404868	0.091	ENSG00000149273|RPS3|chr11|+|MXE|75402351|75402379|75404019|75404207|75401639|75401733|75404671|75404868_UP
ENSG00000115875|SRSF7|chr2|-|RI|38748578|38749705|38748578|38748653|38749528|38749705	0.091	ENSG00000115875|SRSF7|chr2|-|RI|38748578|38749705|38748578|38748653|38749528|38749705_UP
ENSG00000068323|TFE3|chrX|-|A3SS|49039106|49039410|49039106|49039345|49040454|49040568	0.091	ENSG00000068323|TFE3|chrX|-|A3SS|49039106|49039410|49039106|49039345|49040454|49040568_UP
ENSG00000122359|ANXA11|chr10|-|SE|80176106|80176155|80172806|80172869|80205342|80205572	0.092	ENSG00000122359|ANXA11|chr10|-|SE|80176106|80176155|80172806|80172869|80205342|80205572_UP
ENSG00000055955|ITIH4|chr3|-|A5SS|52818051|52818283|52818256|52818283|52816883|52817058	0.092	ENSG00000055955|ITIH4|chr3|-|A5SS|52818051|52818283|52818256|52818283|52816883|52817058_UP
ENSG00000110721|CHKA|chr11|-|SE|68061492|68061830|68053514|68054047|68061952|68062034	0.093	ENSG00000110721|CHKA|chr11|-|SE|68061492|68061830|68053514|68054047|68061952|68062034_UP
ENSG00000149636|DSN1|chr20|-|SE|36771424|36771473|36770872|36771193|36773661|36773720	0.093	ENSG00000149636|DSN1|chr20|-|SE|36771424|36771473|36770872|36771193|36773661|36773720_UP
ENSG00000075151|EIF4G3|chr1|-|SE|21001198|21001312|20981047|20981227|21002712|21002808	0.093	ENSG00000075151|EIF4G3|chr1|-|SE|21001198|21001312|20981047|20981227|21002712|21002808_UP
ENSG00000182325|FBXL6|chr8|-|A5SS|144357438|144357502|144357456|144357502|144356989|144357121	0.093	ENSG00000182325|FBXL6|chr8|-|A5SS|144357438|144357502|144357456|144357502|144356989|144357121_UP
ENSG00000125347|IRF1|chr5|-|SE|132489391|132489483|132486953|132487130|132490544|132490655	0.093	ENSG00000125347|IRF1|chr5|-|SE|132489391|132489483|132486953|132487130|132490544|132490655_UP
ENSG00000174099|MSRB3|chr12|+|SE|65308528|65308655|65278642|65278865|65326825|65326934	0.093	ENSG00000174099|MSRB3|chr12|+|SE|65308528|65308655|65278642|65278865|65326825|65326934_UP
ENSG00000022840|RNF10|chr12|+|SE|120571190|120571291|120566824|120566980|120575630|120575688	0.093	ENSG00000022840|RNF10|chr12|+|SE|120571190|120571291|120566824|120566980|120575630|120575688_UP
ENSG00000092108|SCFD1|chr14|+|MXE|30628208|30628279|30630476|30630565|30622318|30622399|30633946|30634037	0.093	ENSG00000092108|SCFD1|chr14|+|MXE|30628208|30628279|30630476|30630565|30622318|30622399|30633946|30634037_UP
ENSG00000255717|SNHG1|chr11|-|RI|62853800|62854064|62853800|62853833|62854017|62854064	0.093	ENSG00000255717|SNHG1|chr11|-|RI|62853800|62854064|62853800|62853833|62854017|62854064_UP
ENSG00000059377|TBXAS1|chr7|+|SE|140017670|140017833|140015722|140015860|140020024|140020279	0.093	ENSG00000059377|TBXAS1|chr7|+|SE|140017670|140017833|140015722|140015860|140020024|140020279_UP
ENSG00000110719|TCIRG1|chr11|+|RI|68042945|68043497|68042945|68043031|68043370|68043497	0.093	ENSG00000110719|TCIRG1|chr11|+|RI|68042945|68043497|68042945|68043031|68043370|68043497_UP
ENSG00000114779|ABHD14B|chr3|-|SE|51971459|51971892|51969942|51970184|51973964|51974031	0.094	ENSG00000114779|ABHD14B|chr3|-|SE|51971459|51971892|51969942|51970184|51973964|51974031_UP
ENSG00000131069|ACSS2|chr20|+|SE|34926104|34926281|34925697|34925766|34926876|34926938	0.094	ENSG00000131069|ACSS2|chr20|+|SE|34926104|34926281|34925697|34925766|34926876|34926938_UP
ENSG00000138641|HERC3|chr4|+|SE|88676217|88676241|88670138|88670252|88676333|88676423	0.094	ENSG00000138641|HERC3|chr4|+|SE|88676217|88676241|88670138|88670252|88676333|88676423_UP
ENSG00000175221|MED16|chr19|-|SE|889637|889807|885769|886201|890136|890244	0.094	ENSG00000175221|MED16|chr19|-|SE|889637|889807|885769|886201|890136|890244_UP
ENSG00000169180|XPO6|chr16|-|SE|28152929|28152964|28152658|28152785|28156073|28156117	0.094	ENSG00000169180|XPO6|chr16|-|SE|28152929|28152964|28152658|28152785|28156073|28156117_UP
ENSG00000117335|CD46|chr1|+|MXE|207767778|207767823|207770320|207770362|207767012|207767195|207783291|207783330	0.095	ENSG00000117335|CD46|chr1|+|MXE|207767778|207767823|207770320|207770362|207767012|207767195|207783291|207783330_UP
ENSG00000108654|DDX5|chr17|-|RI|64502161|64502549|64502161|64502223|64502438|64502549	0.095	ENSG00000108654|DDX5|chr17|-|RI|64502161|64502549|64502161|64502223|64502438|64502549_UP
ENSG00000213930|GALT|chr9|+|RI|34647088|34647567|34647088|34647258|34647491|34647567	0.095	ENSG00000213930|GALT|chr9|+|RI|34647088|34647567|34647088|34647258|34647491|34647567_UP
ENSG00000101928|MOSPD1|chrX|-|SE|134899089|134899165|134896813|134897034|134899279|134899534	0.095	ENSG00000101928|MOSPD1|chrX|-|SE|134899089|134899165|134896813|134897034|134899279|134899534_UP
ENSG00000123240|OPTN|chr10|+|SE|13108137|13108289|13100172|13100302|13109111|13109288	0.095	ENSG00000123240|OPTN|chr10|+|SE|13108137|13108289|13100172|13100302|13109111|13109288_UP
ENSG00000184381|PLA2G6|chr22|-|SE|38116319|38116410|38116074|38116211|38120758|38120909	0.095	ENSG00000184381|PLA2G6|chr22|-|SE|38116319|38116410|38116074|38116211|38120758|38120909_UP
ENSG00000161618|ALDH16A1|chr19|+|RI|49461618|49462036|49461618|49461800|49461883|49462036	0.096	ENSG00000161618|ALDH16A1|chr19|+|RI|49461618|49462036|49461618|49461800|49461883|49462036_UP
ENSG00000107077|KDM4C|chr9|+|SE|7105401|7105500|7103684|7103870|7128065|7128236	0.096	ENSG00000107077|KDM4C|chr9|+|SE|7105401|7105500|7103684|7103870|7128065|7128236_UP
ENSG00000257103|LSM14A|chr19|+|SE|34226407|34226464|34221349|34221738|34227364|34227617	0.096	ENSG00000257103|LSM14A|chr19|+|SE|34226407|34226464|34221349|34221738|34227364|34227617_UP
ENSG00000170248|PDCD6IP|chr3|+|SE|33827621|33827739|33826479|33826580|33828837|33828969	0.096	ENSG00000170248|PDCD6IP|chr3|+|SE|33827621|33827739|33826479|33826580|33828837|33828969_UP
ENSG00000172345|STARD5|chr15|-|SE|81322898|81322948|81322407|81322540|81324000|81324125	0.096	ENSG00000172345|STARD5|chr15|-|SE|81322898|81322948|81322407|81322540|81324000|81324125_UP
ENSG00000101493|ZNF516|chr18|-|SE|76370527|76370595|76358189|76362557|76371466|76371571	0.096	ENSG00000101493|ZNF516|chr18|-|SE|76370527|76370595|76358189|76362557|76371466|76371571_UP
ENSG00000172785|CBWD1|chr9|-|SE|177722|177820|175697|175784|178815|179016	0.097	ENSG00000172785|CBWD1|chr9|-|SE|177722|177820|175697|175784|178815|179016_UP
ENSG00000141068|KSR1|chr17|+|SE|27601359|27601401|27597267|27597436|27603833|27603888	0.097	ENSG00000141068|KSR1|chr17|+|SE|27601359|27601401|27597267|27597436|27603833|27603888_UP
ENSG00000136490|LIMD2|chr17|-|RI|63698798|63699069|63698798|63698938|63699027|63699069	0.097	ENSG00000136490|LIMD2|chr17|-|RI|63698798|63699069|63698798|63698938|63699027|63699069_UP
ENSG00000146909|NOM1|chr7|+|SE|156958605|156958856|156954111|156954298|156959850|156960118	0.097	ENSG00000146909|NOM1|chr7|+|SE|156958605|156958856|156954111|156954298|156959850|156960118_UP
ENSG00000100911|PSME2|chr14|-|RI|24145709|24146240|24145709|24145896|24146207|24146240	0.097	ENSG00000100911|PSME2|chr14|-|RI|24145709|24146240|24145709|24145896|24146207|24146240_UP
ENSG00000146223|RPL7L1|chr6|+|A5SS|42880860|42881082|42880860|42880966|42883450|42883614	0.097	ENSG00000146223|RPL7L1|chr6|+|A5SS|42880860|42881082|42880860|42880966|42883450|42883614_UP
ENSG00000088826|SMOX|chr20|+|RI|4182088|4182848|4182088|4182323|4182482|4182848	0.097	ENSG00000088826|SMOX|chr20|+|RI|4182088|4182848|4182088|4182323|4182482|4182848_UP
ENSG00000234127|TRIM26|chr6|-|SE|30201034|30201138|30198665|30199153|30213304|30213427	0.097	ENSG00000234127|TRIM26|chr6|-|SE|30201034|30201138|30198665|30199153|30213304|30213427_UP
ENSG00000077254|USP33|chr1|-|A3SS|77721830|77721925|77721830|77721901|77722023|77722196	0.097	ENSG00000077254|USP33|chr1|-|A3SS|77721830|77721925|77721830|77721901|77722023|77722196_UP
ENSG00000083828|ZNF586|chr19|+|SE|57776542|57776669|57769669|57769878|57778750|57780577	0.097	ENSG00000083828|ZNF586|chr19|+|SE|57776542|57776669|57769669|57769878|57778750|57780577_UP
ENSG00000075292|ZNF638|chr2|+|SE|71348752|71350271|71331763|71331875|71355718|71355780	0.097	ENSG00000075292|ZNF638|chr2|+|SE|71348752|71350271|71331763|71331875|71355718|71355780_UP
ENSG00000253710|ALG11|chr13|+|A5SS|52012410|52012574|52012410|52012462|52018912|52019143	0.098	ENSG00000253710|ALG11|chr13|+|A5SS|52012410|52012574|52012410|52012462|52018912|52019143_UP
ENSG00000204463|BAG6|chr6|-|SE|31644306|31644414|31644081|31644194|31644524|31644602	0.098	ENSG00000204463|BAG6|chr6|-|SE|31644306|31644414|31644081|31644194|31644524|31644602_UP
ENSG00000186470|BTN3A2|chr6|+|RI|26367989|26368267|26367989|26368050|26368177|26368267	0.098	ENSG00000186470|BTN3A2|chr6|+|RI|26367989|26368267|26367989|26368050|26368177|26368267_UP
ENSG00000173575|CHD2|chr15|+|SE|92901166|92901299|92900188|92900824|92924320|92924552	0.098	ENSG00000173575|CHD2|chr15|+|SE|92901166|92901299|92900188|92900824|92924320|92924552_UP
ENSG00000108773|KAT2A|chr17|-|A5SS|42119053|42119436|42119244|42119436|42118296|42118403	0.098	ENSG00000108773|KAT2A|chr17|-|A5SS|42119053|42119436|42119244|42119436|42118296|42118403_UP
ENSG00000095380|NANS|chr9|+|SE|98075569|98075732|98060781|98060997|98076917|98077017	0.098	ENSG00000095380|NANS|chr9|+|SE|98075569|98075732|98060781|98060997|98076917|98077017_UP
ENSG00000151414|NEK7|chr1|+|SE|198220998|198221110|198156993|198157276|198232552|198232637	0.098	ENSG00000151414|NEK7|chr1|+|SE|198220998|198221110|198156993|198157276|198232552|198232637_UP
ENSG00000184381|PLA2G6|chr22|-|SE|38144895|38144978|38143236|38143288|38145437|38145653	0.098	ENSG00000184381|PLA2G6|chr22|-|SE|38144895|38144978|38143236|38143288|38145437|38145653_UP
ENSG00000117751|PPP1R8|chr1|+|SE|27841013|27841234|27838698|27838852|27843185|27843330	0.098	ENSG00000117751|PPP1R8|chr1|+|SE|27841013|27841234|27838698|27838852|27843185|27843330_UP
ENSG00000182199|SHMT2|chr12|+|RI|57230802|57231913|57230802|57231000|57231712|57231913	0.098	ENSG00000182199|SHMT2|chr12|+|RI|57230802|57231913|57230802|57231000|57231712|57231913_UP
ENSG00000153827|TRIP12|chr2|-|SE|229771518|229771632|229769230|229769325|229774096|229774261	0.098	ENSG00000153827|TRIP12|chr2|-|SE|229771518|229771632|229769230|229769325|229774096|229774261_UP
ENSG00000103197|TSC2|chr16|+|RI|2053341|2054440|2053341|2053452|2054295|2054440	0.098	ENSG00000103197|TSC2|chr16|+|RI|2053341|2054440|2053341|2053452|2054295|2054440_UP
ENSG00000120860|WASHC3|chr12|-|SE|102017719|102017805|102012941|102013192|102025973|102026038	0.098	ENSG00000120860|WASHC3|chr12|-|SE|102017719|102017805|102012941|102013192|102025973|102026038_UP
ENSG00000178935|ZNF552|chr19|-|A5SS|57814532|57814913|57814710|57814913|57813293|57813420	0.098	ENSG00000178935|ZNF552|chr19|-|A5SS|57814532|57814913|57814710|57814913|57813293|57813420_UP
ENSG00000275832|ARHGAP23|chr17|+|SE|38498413|38498510|38497784|38497826|38500596|38500628	0.099	ENSG00000275832|ARHGAP23|chr17|+|SE|38498413|38498510|38497784|38497826|38500596|38500628_UP
ENSG00000087470|DNM1L|chr12|+|SE|32738263|32738296|32737864|32737942|32740063|32740240	0.099	ENSG00000087470|DNM1L|chr12|+|SE|32738263|32738296|32737864|32737942|32740063|32740240_UP
ENSG00000198715|GLMP|chr1|-|SE|156293319|156293429|156292694|156293209|156294017|156294076	0.099	ENSG00000198715|GLMP|chr1|-|SE|156293319|156293429|156292694|156293209|156294017|156294076_UP
ENSG00000185499|MUC1|chr1|-|A3SS|155188162|155188285|155188162|155188231|155192182|155192283	0.099	ENSG00000185499|MUC1|chr1|-|A3SS|155188162|155188285|155188162|155188231|155192182|155192283_UP
ENSG00000171204|TMEM126B|chr11|+|MXE|85629131|85629262|85631144|85631316|85628592|85628688|85631686|85631808	0.099	ENSG00000171204|TMEM126B|chr11|+|MXE|85629131|85629262|85631144|85631316|85628592|85628688|85631686|85631808_UP
ENSG00000254996|ANKHD1-EIF4EBP3|chr5|+|RI|140538918|140542281|140538918|140539083|140542171|140542281	0.1	ENSG00000254996|ANKHD1-EIF4EBP3|chr5|+|RI|140538918|140542281|140538918|140539083|140542171|140542281_UP
ENSG00000212694|LINC01089|chr12|-|RI|121795266|121796242|121795266|121795726|121796190|121796242	0.1	ENSG00000212694|LINC01089|chr12|-|RI|121795266|121796242|121795266|121795726|121796190|121796242_UP
ENSG00000161204|ABCF3|chr3|+|RI|184189087|184189277|184189087|184189144|184189254|184189277	0.101	ENSG00000161204|ABCF3|chr3|+|RI|184189087|184189277|184189087|184189144|184189254|184189277_UP
ENSG00000171735|CAMTA1|chr1|+|SE|6886239|6886346|6871756|6871840|6887653|6887842	0.101	ENSG00000171735|CAMTA1|chr1|+|SE|6886239|6886346|6871756|6871840|6887653|6887842_UP
ENSG00000162063|CCNF|chr16|+|A3SS|2449110|2449462|2449281|2449462|2448854|2448978	0.101	ENSG00000162063|CCNF|chr16|+|A3SS|2449110|2449462|2449281|2449462|2448854|2448978_UP
ENSG00000113240|CLK4|chr5|-|SE|178605824|178605865|178605302|178605382|178608375|178608458	0.101	ENSG00000113240|CLK4|chr5|-|SE|178605824|178605865|178605302|178605382|178608375|178608458_UP
ENSG00000140995|DEF8|chr16|+|SE|89949416|89949638|89948774|89948814|89954242|89954376	0.101	ENSG00000140995|DEF8|chr16|+|SE|89949416|89949638|89948774|89948814|89954242|89954376_UP
ENSG00000120533|ENY2|chr8|+|A3SS|109340443|109340563|109340490|109340563|109339319|109339390	0.101	ENSG00000120533|ENY2|chr8|+|A3SS|109340443|109340563|109340490|109340563|109339319|109339390_UP
ENSG00000100242|SUN2|chr22|-|RI|38740266|38741050|38740266|38740432|38741006|38741050	0.101	ENSG00000100242|SUN2|chr22|-|RI|38740266|38741050|38740266|38740432|38741006|38741050_UP
ENSG00000178252|WDR6|chr3|+|SE|49011420|49011516|49007392|49007531|49011634|49012251	0.101	ENSG00000178252|WDR6|chr3|+|SE|49011420|49011516|49007392|49007531|49011634|49012251_UP
ENSG00000131503|ANKHD1|chr5|+|SE|140472238|140472295|140464666|140464776|140482579|140482667	0.102	ENSG00000131503|ANKHD1|chr5|+|SE|140472238|140472295|140464666|140464776|140482579|140482667_UP
ENSG00000205629|LCMT1|chr16|+|SE|25125963|25126126|25111730|25111996|25128474|25128566	0.102	ENSG00000205629|LCMT1|chr16|+|SE|25125963|25126126|25111730|25111996|25128474|25128566_UP
ENSG00000108788|MLX|chr17|+|RI|42569506|42570183|42569506|42569606|42569981|42570183	0.102	ENSG00000108788|MLX|chr17|+|RI|42569506|42570183|42569506|42569606|42569981|42570183_UP
ENSG00000087266|SH3BP2|chr4|+|SE|2809778|2809829|2793070|2793138|2820613|2820753	0.102	ENSG00000087266|SH3BP2|chr4|+|SE|2809778|2809829|2793070|2793138|2820613|2820753_UP
ENSG00000197150|ABCB8|chr7|+|RI|151034272|151034599|151034272|151034428|151034504|151034599	0.103	ENSG00000197150|ABCB8|chr7|+|RI|151034272|151034599|151034272|151034428|151034504|151034599_UP
ENSG00000175061|LRRC75A-AS1|chr17|+|RI|16439326|16439703|16439326|16439414|16439527|16439703	0.103	ENSG00000175061|LRRC75A-AS1|chr17|+|RI|16439326|16439703|16439326|16439414|16439527|16439703_UP
ENSG00000137409|MTCH1|chr6|-|A5SS|36972651|36972796|36972702|36972796|36970646|36970694	0.103	ENSG00000137409|MTCH1|chr6|-|A5SS|36972651|36972796|36972702|36972796|36970646|36970694_UP
ENSG00000175309|PHYKPL|chr5|-|SE|178212972|178213103|178210967|178211970|178214795|178214885	0.103	ENSG00000175309|PHYKPL|chr5|-|SE|178212972|178213103|178210967|178211970|178214795|178214885_UP
ENSG00000097033|SH3GLB1|chr1|+|SE|86728402|86728489|86724312|86724405|86734601|86734691	0.103	ENSG00000097033|SH3GLB1|chr1|+|SE|86728402|86728489|86724312|86724405|86734601|86734691_UP
ENSG00000166888|STAT6|chr12|-|SE|57107604|57107743|57107230|57107314|57111128|57111359	0.103	ENSG00000166888|STAT6|chr12|-|SE|57107604|57107743|57107230|57107314|57111128|57111359_UP
ENSG00000117143|UAP1|chr1|+|SE|162592731|162592782|162590322|162590511|162597791|162597858	0.103	ENSG00000117143|UAP1|chr1|+|SE|162592731|162592782|162590322|162590511|162597791|162597858_UP
ENSG00000198925|ATG9A|chr2|-|SE|219228433|219228485|219227921|219228053|219229534|219229594	0.104	ENSG00000198925|ATG9A|chr2|-|SE|219228433|219228485|219227921|219228053|219229534|219229594_UP
ENSG00000099622|CIRBP|chr19|+|RI|1270927|1271467|1270927|1271036|1271328|1271467	0.104	ENSG00000099622|CIRBP|chr19|+|RI|1270927|1271467|1270927|1271036|1271328|1271467_UP
ENSG00000135842|FAM129A|chr1|-|SE|184823637|184823742|184823166|184823329|184831846|184831962	0.104	ENSG00000135842|FAM129A|chr1|-|SE|184823637|184823742|184823166|184823329|184831846|184831962_UP
ENSG00000143774|GUK1|chr1|+|SE|228148370|228148539|228147620|228147699|228148664|228148808	0.104	ENSG00000143774|GUK1|chr1|+|SE|228148370|228148539|228147620|228147699|228148664|228148808_UP
ENSG00000174373|RALGAPA1|chr14|-|A5SS|35688458|35690003|35689835|35690003|35686541|35686666	0.104	ENSG00000174373|RALGAPA1|chr14|-|A5SS|35688458|35690003|35689835|35690003|35686541|35686666_UP
ENSG00000087077|TRIP6|chr7|+|SE|100867860|100867988|100867137|100867606|100868107|100868233	0.104	ENSG00000087077|TRIP6|chr7|+|SE|100867860|100867988|100867137|100867606|100868107|100868233_UP
ENSG00000011243|AKAP8L|chr19|-|A5SS|15398629|15399410|15399301|15399410|15397713|15397855	0.105	ENSG00000011243|AKAP8L|chr19|-|A5SS|15398629|15399410|15399301|15399410|15397713|15397855_UP
ENSG00000169016|E2F6|chr2|-|SE|11458280|11458351|11457178|11457233|11465771|11465879	0.105	ENSG00000169016|E2F6|chr2|-|SE|11458280|11458351|11457178|11457233|11465771|11465879_UP
ENSG00000068796|KIF2A|chr5|+|A5SS|62352587|62352710|62352587|62352653|62353274|62353375	0.105	ENSG00000068796|KIF2A|chr5|+|A5SS|62352587|62352710|62352587|62352653|62353274|62353375_UP
ENSG00000215041|NEURL4|chr17|-|RI|7321559|7322010|7321559|7321787|7321864|7322010	0.105	ENSG00000215041|NEURL4|chr17|-|RI|7321559|7322010|7321559|7321787|7321864|7322010_UP
ENSG00000102710|SUPT20H|chr13|-|SE|37048563|37048599|37047877|37047936|37051487|37051559	0.105	ENSG00000102710|SUPT20H|chr13|-|SE|37048563|37048599|37047877|37047936|37051487|37051559_UP
ENSG00000100038|TOP3B|chr22|-|RI|21957026|21958693|21957026|21957595|21958491|21958693	0.105	ENSG00000100038|TOP3B|chr22|-|RI|21957026|21958693|21957026|21957595|21958491|21958693_UP
ENSG00000169902|TPST1|chr7|+|SE|66205793|66205921|66205316|66205522|66240324|66240550	0.105	ENSG00000169902|TPST1|chr7|+|SE|66205793|66205921|66205316|66205522|66240324|66240550_UP
ENSG00000162300|ZFPL1|chr11|+|RI|65084241|65084800|65084241|65084378|65084690|65084800	0.105	ENSG00000162300|ZFPL1|chr11|+|RI|65084241|65084800|65084241|65084378|65084690|65084800_UP
ENSG00000011198|ABHD5|chr3|+|SE|43717765|43717857|43714946|43715058|43718442|43718606	0.106	ENSG00000011198|ABHD5|chr3|+|SE|43717765|43717857|43714946|43715058|43718442|43718606_UP
ENSG00000128272|ATF4|chr22|+|RI|39520563|39521671|39520563|39520751|39521353|39521671	0.106	ENSG00000128272|ATF4|chr22|+|RI|39520563|39521671|39520563|39520751|39521353|39521671_UP
ENSG00000119772|DNMT3A|chr2|-|SE|25241561|25241707|25240639|25240730|25243897|25243970	0.106	ENSG00000119772|DNMT3A|chr2|-|SE|25241561|25241707|25240639|25240730|25243897|25243970_UP
ENSG00000106123|EPHB6|chr7|+|SE|142863630|142863695|142862755|142863327|142863965|142864262	0.106	ENSG00000106123|EPHB6|chr7|+|SE|142863630|142863695|142862755|142863327|142863965|142864262_UP
ENSG00000185811|IKZF1|chr7|+|SE|50376532|50376793|50327378|50327757|50382539|50382707	0.106	ENSG00000185811|IKZF1|chr7|+|SE|50376532|50376793|50327378|50327757|50382539|50382707_UP
ENSG00000115548|KDM3A|chr2|+|SE|86460778|86460831|86456982|86457071|86464052|86464216	0.106	ENSG00000115548|KDM3A|chr2|+|SE|86460778|86460831|86456982|86457071|86464052|86464216_UP
ENSG00000131446|MGAT1|chr5|-|SE|180795655|180795875|180792869|180793097|180802679|180802803	0.106	ENSG00000131446|MGAT1|chr5|-|SE|180795655|180795875|180792869|180793097|180802679|180802803_UP
ENSG00000125814|NAPB|chr20|-|SE|23395138|23395185|23394921|23394999|23402992|23403072	0.106	ENSG00000125814|NAPB|chr20|-|SE|23395138|23395185|23394921|23394999|23402992|23403072_UP
ENSG00000002919|SNX11|chr17|+|SE|48110707|48110767|48107557|48107838|48112030|48112085	0.106	ENSG00000002919|SNX11|chr17|+|SE|48110707|48110767|48107557|48107838|48112030|48112085_UP
ENSG00000040341|STAU2|chr8|-|SE|73709031|73709162|73688650|73688813|73738283|73738344	0.106	ENSG00000040341|STAU2|chr8|-|SE|73709031|73709162|73688650|73688813|73738283|73738344_UP
ENSG00000136404|TM6SF1|chr15|+|A5SS|83119577|83119734|83119577|83119681|83121920|83122003	0.106	ENSG00000136404|TM6SF1|chr15|+|A5SS|83119577|83119734|83119577|83119681|83121920|83122003_UP
ENSG00000166140|ZFYVE19|chr15|+|RI|40813942|40814569|40813942|40814070|40814147|40814569	0.106	ENSG00000166140|ZFYVE19|chr15|+|RI|40813942|40814569|40813942|40814070|40814147|40814569_UP
ENSG00000012048|BRCA1|chr17|-|SE|43079333|43079399|43076487|43076614|43082403|43082575	0.107	ENSG00000012048|BRCA1|chr17|-|SE|43079333|43079399|43076487|43076614|43082403|43082575_UP
ENSG00000213930|GALT|chr9|+|RI|34647491|34647961|34647491|34647705|34647831|34647961	0.107	ENSG00000213930|GALT|chr9|+|RI|34647491|34647961|34647491|34647705|34647831|34647961_UP
ENSG00000234741|GAS5|chr1|-|RI|173864256|173864704|173864256|173864304|173864674|173864704	0.107	ENSG00000234741|GAS5|chr1|-|RI|173864256|173864704|173864256|173864304|173864674|173864704_UP
ENSG00000161835|GRASP|chr12|+|A5SS|52011038|52011207|52011038|52011141|52013686|52013780	0.107	ENSG00000161835|GRASP|chr12|+|A5SS|52011038|52011207|52011038|52011141|52013686|52013780_UP
ENSG00000175221|MED16|chr19|-|SE|876973|877180|875243|875454|879936|880148	0.107	ENSG00000175221|MED16|chr19|-|SE|876973|877180|875243|875454|879936|880148_UP
ENSG00000051825|MPHOSPH9|chr12|-|MXE|123202623|123203084|123203113|123203375|123202163|123202319|123210055|123210162	0.107	ENSG00000051825|MPHOSPH9|chr12|-|MXE|123202623|123203084|123203113|123203375|123202163|123202319|123210055|123210162_UP
ENSG00000179818|PCBP1-AS1|chr2|-|MXE|70055713|70055910|70083537|70083687|70053730|70053792|70085546|70085624	0.107	ENSG00000179818|PCBP1-AS1|chr2|-|MXE|70055713|70055910|70083537|70083687|70053730|70053792|70085546|70085624_UP
ENSG00000163421|PROK2|chr3|-|SE|71774444|71774507|71772100|71772828|71781466|71781592	0.107	ENSG00000163421|PROK2|chr3|-|SE|71774444|71774507|71772100|71772828|71781466|71781592_UP
ENSG00000106524|ANKMY2|chr7|-|SE|16644684|16644812|16636390|16636455|16645506|16645816	0.108	ENSG00000106524|ANKMY2|chr7|-|SE|16644684|16644812|16636390|16636455|16645506|16645816_UP
ENSG00000100577|GSTZ1|chr14|+|SE|77327911|77328037|77327471|77327552|77329122|77329201	0.108	ENSG00000100577|GSTZ1|chr14|+|SE|77327911|77328037|77327471|77327552|77329122|77329201_UP
ENSG00000157216|SSBP3|chr1|-|SE|54258068|54258149|54257126|54257186|54281437|54281527	0.108	ENSG00000157216|SSBP3|chr1|-|SE|54258068|54258149|54257126|54257186|54281437|54281527_UP
ENSG00000160392|C19orf47|chr19|-|A5SS|40341785|40341890|40341838|40341890|40336319|40336407	0.109	ENSG00000160392|C19orf47|chr19|-|A5SS|40341785|40341890|40341838|40341890|40336319|40336407_UP
ENSG00000158856|DMTN|chr8|+|SE|22080804|22080870|22080617|22080625|22081112|22081193	0.109	ENSG00000158856|DMTN|chr8|+|SE|22080804|22080870|22080617|22080625|22081112|22081193_UP
ENSG00000165689|ENTR1|chr9|-|SE|136410089|136410239|136407825|136407938|136410327|136410527	0.109	ENSG00000165689|ENTR1|chr9|-|SE|136410089|136410239|136407825|136407938|136410327|136410527_UP
ENSG00000101158|NELFCD|chr20|+|A5SS|58989857|58990232|58989857|58989988|58990909|58991075	0.109	ENSG00000101158|NELFCD|chr20|+|A5SS|58989857|58990232|58989857|58989988|58990909|58991075_UP
ENSG00000124784|RIOK1|chr6|+|A3SS|7395020|7395143|7395052|7395143|7393098|7393303	0.109	ENSG00000124784|RIOK1|chr6|+|A3SS|7395020|7395143|7395052|7395143|7393098|7393303_UP
ENSG00000140553|UNC45A|chr15|+|RI|90935945|90936460|90935945|90935982|90936136|90936460	0.109	ENSG00000140553|UNC45A|chr15|+|RI|90935945|90936460|90935945|90935982|90936136|90936460_UP
ENSG00000167522|ANKRD11|chr16|-|RI|89286038|89288670|89286038|89286186|89288527|89288670	0.11	ENSG00000167522|ANKRD11|chr16|-|RI|89286038|89288670|89286038|89286186|89288527|89288670_UP
ENSG00000103313|MEFV|chr16|-|A5SS|3244135|3244286|3244253|3244286|3243859|3243892	0.11	ENSG00000103313|MEFV|chr16|-|A5SS|3244135|3244286|3244253|3244286|3243859|3243892_UP
ENSG00000129158|SERGEF|chr11|-|SE|17999493|17999572|17995795|17995909|18000496|18000557	0.11	ENSG00000129158|SERGEF|chr11|-|SE|17999493|17999572|17995795|17995909|18000496|18000557_UP
ENSG00000136932|TRMO|chr9|-|SE|97916163|97916338|97913251|97913558|97922417|97922487	0.11	ENSG00000136932|TRMO|chr9|-|SE|97916163|97916338|97913251|97913558|97922417|97922487_UP
ENSG00000162066|AMDHD2|chr16|+|SE|2528649|2528718|2528351|2528559|2528993|2529060	0.111	ENSG00000162066|AMDHD2|chr16|+|SE|2528649|2528718|2528351|2528559|2528993|2529060_UP
ENSG00000183826|BTBD9|chr6|-|SE|38612833|38613033|38597909|38598121|38639799|38639868	0.111	ENSG00000183826|BTBD9|chr6|-|SE|38612833|38613033|38597909|38598121|38639799|38639868_UP
ENSG00000215908|CROCCP2|chr1|-|A3SS|16619844|16620245|16619844|16620038|16625774|16626005	0.111	ENSG00000215908|CROCCP2|chr1|-|A3SS|16619844|16620245|16619844|16620038|16625774|16626005_UP
ENSG00000197989|SNHG12|chr1|-|RI|28579532|28579981|28579532|28579587|28579941|28579981	0.111	ENSG00000197989|SNHG12|chr1|-|RI|28579532|28579981|28579532|28579587|28579941|28579981_UP
ENSG00000087087|SRRT|chr7|+|SE|100882457|100883090|100882052|100882241|100884069|100884239	0.111	ENSG00000087087|SRRT|chr7|+|SE|100882457|100883090|100882052|100882241|100884069|100884239_UP
ENSG00000130775|THEMIS2|chr1|+|SE|27879643|27880054|27876587|27876728|27885294|27885451	0.111	ENSG00000130775|THEMIS2|chr1|+|SE|27879643|27880054|27876587|27876728|27885294|27885451_UP
ENSG00000160766|GBAP1|chr1|-|SE|155217518|155217593|155217239|155217373|155217963|155218049	0.112	ENSG00000160766|GBAP1|chr1|-|SE|155217518|155217593|155217239|155217373|155217963|155218049_UP
ENSG00000143493|INTS7|chr1|-|A3SS|211968512|211968707|211968512|211968603|211975165|211975372	0.112	ENSG00000143493|INTS7|chr1|-|A3SS|211968512|211968707|211968512|211968603|211975165|211975372_UP
ENSG00000071054|MAP4K4|chr2|+|SE|101863820|101864051|101860824|101860986|101864929|101865003	0.112	ENSG00000071054|MAP4K4|chr2|+|SE|101863820|101864051|101860824|101860986|101864929|101865003_UP
ENSG00000168488|ATXN2L|chr16|+|RI|28835932|28837237|28835932|28836122|28836727|28837237	0.113	ENSG00000168488|ATXN2L|chr16|+|RI|28835932|28837237|28835932|28836122|28836727|28837237_UP
ENSG00000166169|POLL|chr10|-|A5SS|101584601|101584919|101584877|101584919|101583507|101583681	0.113	ENSG00000166169|POLL|chr10|-|A5SS|101584601|101584919|101584877|101584919|101583507|101583681_UP
ENSG00000081237|PTPRC|chr1|+|SE|198702386|198702530|198699563|198699704|198703297|198703346	0.113	ENSG00000081237|PTPRC|chr1|+|SE|198702386|198702530|198699563|198699704|198703297|198703346_UP
ENSG00000121064|SCPEP1|chr17|+|MXE|56981081|56981230|56985377|56985467|56978133|56978235|56987694|56987850	0.113	ENSG00000121064|SCPEP1|chr17|+|MXE|56981081|56981230|56985377|56985467|56978133|56978235|56987694|56987850_UP
ENSG00000139370|SLC15A4|chr12|-|SE|128809942|128810053|128809395|128809473|128814774|128815070	0.113	ENSG00000139370|SLC15A4|chr12|-|SE|128809942|128810053|128809395|128809473|128814774|128815070_UP
ENSG00000117868|ESYT2|chr7|-|SE|158752780|158752843|158749648|158749723|158759485|158759581	0.114	ENSG00000117868|ESYT2|chr7|-|SE|158752780|158752843|158749648|158749723|158759485|158759581_UP
ENSG00000100099|HPS4|chr22|-|RI|26466225|26468623|26466225|26466262|26468550|26468623	0.114	ENSG00000100099|HPS4|chr22|-|RI|26466225|26468623|26466225|26466262|26468550|26468623_UP
ENSG00000116353|MECR|chr1|-|SE|29220837|29220921|29216587|29216685|29230730|29230897	0.114	ENSG00000116353|MECR|chr1|-|SE|29220837|29220921|29216587|29216685|29230730|29230897_UP
ENSG00000126822|PLEKHG3|chr14|+|SE|64728995|64729093|64727592|64727982|64730641|64730688	0.114	ENSG00000126822|PLEKHG3|chr14|+|SE|64728995|64729093|64727592|64727982|64730641|64730688_UP
ENSG00000010270|STARD3NL|chr7|+|SE|38179089|38179145|38178350|38178420|38207446|38207729	0.114	ENSG00000010270|STARD3NL|chr7|+|SE|38179089|38179145|38178350|38178420|38207446|38207729_UP
ENSG00000186074|CD300LF|chr17|-|SE|74698575|74698621|74698368|74698481|74703034|74703098	0.115	ENSG00000186074|CD300LF|chr17|-|SE|74698575|74698621|74698368|74698481|74703034|74703098_UP
ENSG00000219626|FAM228B|chr2|+|SE|24161505|24161613|24146929|24147086|24164197|24164335	0.115	ENSG00000219626|FAM228B|chr2|+|SE|24161505|24161613|24146929|24147086|24164197|24164335_UP
ENSG00000100983|GSS|chr20|-|RI|34942487|34943006|34942487|34942627|34942930|34943006	0.115	ENSG00000100983|GSS|chr20|-|RI|34942487|34943006|34942487|34942627|34942930|34943006_UP
ENSG00000132740|IGHMBP2|chr11|+|SE|68935298|68935422|68934330|68934558|68936236|68936334	0.115	ENSG00000132740|IGHMBP2|chr11|+|SE|68935298|68935422|68934330|68934558|68936236|68936334_UP
ENSG00000135597|REPS1|chr6|-|SE|138926400|138926481|138921036|138921124|138929976|138930098	0.115	ENSG00000135597|REPS1|chr6|-|SE|138926400|138926481|138921036|138921124|138929976|138930098_UP
ENSG00000153827|TRIP12|chr2|-|SE|229860405|229860531|229858771|229859574|229879981|229880128	0.115	ENSG00000153827|TRIP12|chr2|-|SE|229860405|229860531|229858771|229859574|229879981|229880128_UP
ENSG00000135506|OS9|chr12|+|A5SS|57718992|57720263|57718992|57719182|57720405|57720518	0.116	ENSG00000135506|OS9|chr12|+|A5SS|57718992|57720263|57718992|57719182|57720405|57720518_UP
ENSG00000137210|TMEM14B|chr6|+|SE|10755141|10755232|10749621|10749698|10770076|10770204	0.116	ENSG00000137210|TMEM14B|chr6|+|SE|10755141|10755232|10749621|10749698|10770076|10770204_UP
ENSG00000143437|ARNT|chr1|-|A3SS|150829903|150829980|150829903|150829965|150831817|150831903	0.117	ENSG00000143437|ARNT|chr1|-|A3SS|150829903|150829980|150829903|150829965|150831817|150831903_UP
ENSG00000170271|FAXDC2|chr5|-|SE|154834624|154834728|154830326|154830922|154834842|154834934	0.117	ENSG00000170271|FAXDC2|chr5|-|SE|154834624|154834728|154830326|154830922|154834842|154834934_UP
ENSG00000164024|METAP1|chr4|+|SE|99037766|99037941|99035399|99035460|99039373|99039465	0.117	ENSG00000164024|METAP1|chr4|+|SE|99037766|99037941|99035399|99035460|99039373|99039465_UP
ENSG00000087087|SRRT|chr7|+|SE|100882764|100883090|100882052|100882241|100884069|100884239	0.117	ENSG00000087087|SRRT|chr7|+|SE|100882764|100883090|100882052|100882241|100884069|100884239_UP
ENSG00000272752|STAG3L5P-PVRIG2P-PILRB|chr7|+|A3SS|100349730|100349887|100349798|100349887|100345864|100345968	0.117	ENSG00000272752|STAG3L5P-PVRIG2P-PILRB|chr7|+|A3SS|100349730|100349887|100349798|100349887|100345864|100345968_UP
ENSG00000178585|CTNNBIP1|chr1|-|SE|9883704|9883738|9877904|9877989|9910094|9910263	0.118	ENSG00000178585|CTNNBIP1|chr1|-|SE|9883704|9883738|9877904|9877989|9910094|9910263_UP
ENSG00000112739|PRPF4B|chr6|+|RI|4056320|4057187|4056320|4056435|4057035|4057187	0.118	ENSG00000112739|PRPF4B|chr6|+|RI|4056320|4057187|4056320|4056435|4057035|4057187_UP
ENSG00000162241|SLC25A45|chr11|-|MXE|65379375|65379561|65379866|65379938|65376817|65377076|65380131|65380175	0.118	ENSG00000162241|SLC25A45|chr11|-|MXE|65379375|65379561|65379866|65379938|65376817|65377076|65380131|65380175_UP
ENSG00000117155|SSX2IP|chr1|-|SE|84671176|84671308|84670645|84670815|84690370|84690545	0.118	ENSG00000117155|SSX2IP|chr1|-|SE|84671176|84671308|84670645|84670815|84690370|84690545_UP
ENSG00000132485|ZRANB2|chr1|-|SE|71065677|71065752|71063336|71065137|71066775|71066934	0.118	ENSG00000132485|ZRANB2|chr1|-|SE|71065677|71065752|71063336|71065137|71066775|71066934_UP
ENSG00000060971|ACAA1|chr3|-|RI|38125825|38126700|38125825|38125881|38126509|38126700	0.119	ENSG00000060971|ACAA1|chr3|-|RI|38125825|38126700|38125825|38125881|38126509|38126700_UP
ENSG00000133657|ATP13A3|chr3|-|SE|194412198|194412288|194402676|194406116|194413758|194413839	0.119	ENSG00000133657|ATP13A3|chr3|-|SE|194412198|194412288|194402676|194406116|194413758|194413839_UP
ENSG00000078177|N4BP2|chr4|+|SE|40100035|40100126|40097226|40097569|40102074|40103218	0.119	ENSG00000078177|N4BP2|chr4|+|SE|40100035|40100126|40097226|40097569|40102074|40103218_UP
ENSG00000127314|RAP1B|chr12|+|MXE|68624674|68624873|68641037|68641153|68610907|68611052|68648698|68648781	0.119	ENSG00000127314|RAP1B|chr12|+|MXE|68624674|68624873|68641037|68641153|68610907|68611052|68648698|68648781_UP
ENSG00000178188|SH2B1|chr16|+|SE|28866011|28867033|28863667|28863754|28867330|28867432	0.119	ENSG00000178188|SH2B1|chr16|+|SE|28866011|28867033|28863667|28863754|28867330|28867432_UP
ENSG00000213983|AP1G2|chr14|-|RI|23563715|23564221|23563715|23563856|23564045|23564221	0.12	ENSG00000213983|AP1G2|chr14|-|RI|23563715|23564221|23563715|23563856|23564045|23564221_UP
ENSG00000162819|BROX|chr1|+|SE|222715144|222715269|222713380|222713416|222715683|222715800	0.12	ENSG00000162819|BROX|chr1|+|SE|222715144|222715269|222713380|222713416|222715683|222715800_UP
ENSG00000160058|BSDC1|chr1|-|MXE|32381213|32381268|32386778|32386895|32378723|32378839|32394079|32394140	0.12	ENSG00000160058|BSDC1|chr1|-|MXE|32381213|32381268|32386778|32386895|32378723|32378839|32394079|32394140_UP
ENSG00000100376|FAM118A|chr22|+|SE|45337833|45337968|45336394|45336411|45340385|45340882	0.12	ENSG00000100376|FAM118A|chr22|+|SE|45337833|45337968|45336394|45336411|45340385|45340882_UP
ENSG00000228315|GUSBP11|chr22|-|SE|23640307|23640423|23638486|23638942|23659864|23660000	0.12	ENSG00000228315|GUSBP11|chr22|-|SE|23640307|23640423|23638486|23638942|23659864|23660000_UP
ENSG00000117640|MTFR1L|chr1|+|A3SS|25829508|25829830|25829617|25829830|25826614|25826826	0.12	ENSG00000117640|MTFR1L|chr1|+|A3SS|25829508|25829830|25829617|25829830|25826614|25826826_UP
ENSG00000108405|P2RX1|chr17|-|RI|3903550|3904024|3903550|3903631|3903927|3904024	0.12	ENSG00000108405|P2RX1|chr17|-|RI|3903550|3904024|3903550|3903631|3903927|3904024_UP
ENSG00000078674|PCM1|chr8|+|SE|17983232|17983289|17980590|17980755|17985446|17985619	0.12	ENSG00000078674|PCM1|chr8|+|SE|17983232|17983289|17980590|17980755|17985446|17985619_UP
ENSG00000126858|RHOT1|chr17|+|SE|32211115|32211238|32208106|32208309|32224615|32225113	0.12	ENSG00000126858|RHOT1|chr17|+|SE|32211115|32211238|32208106|32208309|32224615|32225113_UP
ENSG00000115966|ATF2|chr2|-|SE|175121443|175121540|175118250|175118369|175130137|175130205	0.121	ENSG00000115966|ATF2|chr2|-|SE|175121443|175121540|175118250|175118369|175130137|175130205_UP
ENSG00000283486|FAM95C|chr9|-|SE|38541288|38541562|38540682|38540849|38542311|38543156	0.121	ENSG00000283486|FAM95C|chr9|-|SE|38541288|38541562|38540682|38540849|38542311|38543156_UP
ENSG00000135506|OS9|chr12|+|SE|57720098|57720263|57718992|57719182|57720405|57720518	0.121	ENSG00000135506|OS9|chr12|+|SE|57720098|57720263|57718992|57719182|57720405|57720518_UP
ENSG00000105483|CARD8|chr19|-|SE|48223718|48223868|48221729|48221855|48230437|48230498	0.122	ENSG00000105483|CARD8|chr19|-|SE|48223718|48223868|48221729|48221855|48230437|48230498_UP
ENSG00000007129|CEACAM21|chr19|+|SE|41586153|41586195|41585839|41585871|41586463|41586844	0.122	ENSG00000007129|CEACAM21|chr19|+|SE|41586153|41586195|41585839|41585871|41586463|41586844_UP
ENSG00000166333|ILK|chr11|+|SE|6608045|6608211|6603815|6604360|6608393|6608489	0.122	ENSG00000166333|ILK|chr11|+|SE|6608045|6608211|6603815|6604360|6608393|6608489_UP
ENSG00000100105|PATZ1|chr22|-|SE|31328786|31328859|31325808|31327309|31335691|31335863	0.122	ENSG00000100105|PATZ1|chr22|-|SE|31328786|31328859|31325808|31327309|31335691|31335863_UP
ENSG00000105705|SUGP1|chr19|-|MXE|19310096|19310200|19316421|19316593|19305848|19306076|19320462|19320509	0.122	ENSG00000105705|SUGP1|chr19|-|MXE|19310096|19310200|19316421|19316593|19305848|19306076|19320462|19320509_UP
ENSG00000197343|ZNF655|chr7|+|A3SS|99562343|99562494|99562367|99562494|99561887|99561973	0.122	ENSG00000197343|ZNF655|chr7|+|A3SS|99562343|99562494|99562367|99562494|99561887|99561973_UP
ENSG00000017260|ATP2C1|chr3|+|SE|130894589|130894775|130893967|130894337|130930415|130930526	0.123	ENSG00000017260|ATP2C1|chr3|+|SE|130894589|130894775|130893967|130894337|130930415|130930526_UP
ENSG00000160226|CFAP410|chr21|-|A5SS|44334060|44335804|44335757|44335804|44333032|44333262	0.123	ENSG00000160226|CFAP410|chr21|-|A5SS|44334060|44335804|44335757|44335804|44333032|44333262_UP
ENSG00000185163|DDX51|chr12|-|A5SS|132141102|132141420|132141274|132141420|132140830|132141020	0.123	ENSG00000185163|DDX51|chr12|-|A5SS|132141102|132141420|132141274|132141420|132140830|132141020_UP
ENSG00000187630|DHRS4L2|chr14|+|MXE|23995031|23995133|24001383|24001517|23990181|23990359|24004336|24004392	0.123	ENSG00000187630|DHRS4L2|chr14|+|MXE|23995031|23995133|24001383|24001517|23990181|23990359|24004336|24004392_UP
ENSG00000106123|EPHB6|chr7|+|RI|142865959|142866605|142865959|142866316|142866480|142866605	0.123	ENSG00000106123|EPHB6|chr7|+|RI|142865959|142866605|142865959|142866316|142866480|142866605_UP
ENSG00000139626|ITGB7|chr12|-|MXE|53200242|53200446|53201071|53201194|53197749|53197951|53207201|53207251	0.123	ENSG00000139626|ITGB7|chr12|-|MXE|53200242|53200446|53201071|53201194|53197749|53197951|53207201|53207251_UP
ENSG00000111752|PHC1|chr12|+|A3SS|8922632|8922788|8922656|8922788|8921600|8921750	0.123	ENSG00000111752|PHC1|chr12|+|A3SS|8922632|8922788|8922656|8922788|8921600|8921750_UP
ENSG00000172594|SMPDL3A|chr6|+|SE|122795676|122795890|122789169|122789458|122796823|122796968	0.123	ENSG00000172594|SMPDL3A|chr6|+|SE|122795676|122795890|122789169|122789458|122796823|122796968_UP
ENSG00000130208|APOC1|chr19|+|SE|44914671|44914733|44914246|44914489|44914871|44914949	0.124	ENSG00000130208|APOC1|chr19|+|SE|44914671|44914733|44914246|44914489|44914871|44914949_UP
ENSG00000178149|DALRD3|chr3|-|RI|49015818|49016086|49015818|49015872|49015972|49016086	0.124	ENSG00000178149|DALRD3|chr3|-|RI|49015818|49016086|49015818|49015872|49015972|49016086_UP
ENSG00000144815|NXPE3|chr3|+|SE|101779733|101779934|101779245|101779324|101782109|101782290	0.124	ENSG00000144815|NXPE3|chr3|+|SE|101779733|101779934|101779245|101779324|101782109|101782290_UP
ENSG00000054148|PHPT1|chr9|+|RI|136850012|136850560|136850012|136850137|136850505|136850560	0.124	ENSG00000054148|PHPT1|chr9|+|RI|136850012|136850560|136850012|136850137|136850505|136850560_UP
ENSG00000007541|PIGQ|chr16|+|MXE|580182|580263|580857|580972|579068|579180|582247|582309	0.124	ENSG00000007541|PIGQ|chr16|+|MXE|580182|580263|580857|580972|579068|579180|582247|582309_UP
ENSG00000146063|TRIM41|chr5|+|RI|181233412|181233763|181233412|181233435|181233635|181233763	0.124	ENSG00000146063|TRIM41|chr5|+|RI|181233412|181233763|181233412|181233435|181233635|181233763_UP
ENSG00000129003|VPS13C|chr15|-|SE|61864640|61864820|61863439|61863528|61868658|61868773	0.124	ENSG00000129003|VPS13C|chr15|-|SE|61864640|61864820|61863439|61863528|61868658|61868773_UP
ENSG00000214941|ZSWIM7|chr17|-|RI|15977726|15978163|15977726|15977913|15978043|15978163	0.124	ENSG00000214941|ZSWIM7|chr17|-|RI|15977726|15978163|15977726|15977913|15978043|15978163_UP
ENSG00000152457|DCLRE1C|chr10|-|SE|14947524|14947609|14945104|14945189|14949035|14949087	0.125	ENSG00000152457|DCLRE1C|chr10|-|SE|14947524|14947609|14945104|14945189|14949035|14949087_UP
ENSG00000110324|IL10RA|chr11|+|SE|117986606|117986813|117986393|117986534|117988381|117988502	0.125	ENSG00000110324|IL10RA|chr11|+|SE|117986606|117986813|117986393|117986534|117988381|117988502_UP
ENSG00000119185|ITGB1BP1|chr2|-|SE|9418625|9418732|9412268|9412405|9423372|9423430	0.125	ENSG00000119185|ITGB1BP1|chr2|-|SE|9418625|9418732|9412268|9412405|9423372|9423430_UP
ENSG00000118058|KMT2A|chr11|+|SE|118471661|118471985|118468774|118468844|118474178|118474287	0.125	ENSG00000118058|KMT2A|chr11|+|SE|118471661|118471985|118468774|118468844|118474178|118474287_UP
ENSG00000011376|LARS2|chr3|+|SE|45519692|45519790|45517962|45518072|45520218|45520296	0.125	ENSG00000011376|LARS2|chr3|+|SE|45519692|45519790|45517962|45518072|45520218|45520296_UP
ENSG00000166912|MTMR10|chr15|-|SE|30976818|30976955|30974930|30975003|30990776|30990837	0.125	ENSG00000166912|MTMR10|chr15|-|SE|30976818|30976955|30974930|30975003|30990776|30990837_UP
ENSG00000087053|MTMR2|chr11|-|SE|95887611|95887759|95865600|95865676|95888155|95888261	0.125	ENSG00000087053|MTMR2|chr11|-|SE|95887611|95887759|95865600|95865676|95888155|95888261_UP
ENSG00000149269|PAK1|chr11|-|SE|77397026|77397093|77392442|77392541|77411773|77411944	0.125	ENSG00000149269|PAK1|chr11|-|SE|77397026|77397093|77392442|77392541|77411773|77411944_UP
ENSG00000179532|DNHD1|chr11|+|RI|6570008|6570396|6570008|6570100|6570246|6570396	0.126	ENSG00000179532|DNHD1|chr11|+|RI|6570008|6570396|6570008|6570100|6570246|6570396_UP
ENSG00000113360|DROSHA|chr5|-|SE|31521122|31521215|31515453|31515564|31526078|31526912	0.126	ENSG00000113360|DROSHA|chr5|-|SE|31521122|31521215|31515453|31515564|31526078|31526912_UP
ENSG00000168970|JMJD7-PLA2G4B|chr15|+|RI|41834739|41835223|41834739|41834893|41834969|41835223	0.126	ENSG00000168970|JMJD7-PLA2G4B|chr15|+|RI|41834739|41835223|41834739|41834893|41834969|41835223_UP
ENSG00000046651|OFD1|chrX|+|A3SS|13752703|13753441|13753367|13753441|13751248|13751368	0.126	ENSG00000046651|OFD1|chrX|+|A3SS|13752703|13753441|13753367|13753441|13751248|13751368_UP
ENSG00000107863|ARHGAP21|chr10|-|SE|24591224|24591330|24589270|24589302|24591641|24591683	0.127	ENSG00000107863|ARHGAP21|chr10|-|SE|24591224|24591330|24589270|24589302|24591641|24591683_UP
ENSG00000177479|ARIH2|chr3|+|SE|48945135|48945181|48926717|48927813|48961611|48961679	0.127	ENSG00000177479|ARIH2|chr3|+|SE|48945135|48945181|48926717|48927813|48961611|48961679_UP
ENSG00000064012|CASP8|chr2|+|SE|201274888|201274953|201272897|201272942|201276826|201276968	0.127	ENSG00000064012|CASP8|chr2|+|SE|201274888|201274953|201272897|201272942|201276826|201276968_UP
ENSG00000159147|DONSON|chr21|-|MXE|33583487|33583666|33584589|33584768|33582164|33582246|33585977|33586181	0.127	ENSG00000159147|DONSON|chr21|-|MXE|33583487|33583666|33584589|33584768|33582164|33582246|33585977|33586181_UP
ENSG00000113648|H2AFY|chr5|-|MXE|135350822|135350913|135352945|135353045|135345967|135346057|135360496|135360607	0.127	ENSG00000113648|H2AFY|chr5|-|MXE|135350822|135350913|135352945|135353045|135345967|135346057|135360496|135360607_UP
ENSG00000072571|HMMR|chr5|+|SE|163467700|163467748|163464722|163464802|163469640|163469829	0.127	ENSG00000072571|HMMR|chr5|+|SE|163467700|163467748|163464722|163464802|163469640|163469829_UP
ENSG00000140853|NLRC5|chr16|+|SE|57055435|57055519|57055031|57055094|57058064|57058148	0.127	ENSG00000140853|NLRC5|chr16|+|SE|57055435|57055519|57055031|57055094|57058064|57058148_UP
ENSG00000138750|NUP54|chr4|-|MXE|76136185|76136412|76144148|76144292|76134174|76134362|76144389|76144473	0.127	ENSG00000138750|NUP54|chr4|-|MXE|76136185|76136412|76144148|76144292|76134174|76134362|76144389|76144473_UP
ENSG00000163625|WDFY3|chr4|-|SE|84932269|84932363|84896910|84897010|84966208|84966391	0.127	ENSG00000163625|WDFY3|chr4|-|SE|84932269|84932363|84896910|84897010|84966208|84966391_UP
ENSG00000104231|ZFAND1|chr8|-|SE|81717248|81717288|81714986|81715114|81718181|81718224	0.127	ENSG00000104231|ZFAND1|chr8|-|SE|81717248|81717288|81714986|81715114|81718181|81718224_UP
ENSG00000149089|APIP|chr11|-|SE|34895009|34895110|34890503|34890552|34916227|34916499	0.128	ENSG00000149089|APIP|chr11|-|SE|34895009|34895110|34890503|34890552|34916227|34916499_UP
ENSG00000108654|DDX5|chr17|-|RI|64500548|64502069|64500548|64500773|64502009|64502069	0.128	ENSG00000108654|DDX5|chr17|-|RI|64500548|64502069|64500548|64500773|64502009|64502069_UP
ENSG00000111790|FGFR1OP2|chr12|+|SE|26960514|26960628|26957600|26957743|26963341|26963455	0.128	ENSG00000111790|FGFR1OP2|chr12|+|SE|26960514|26960628|26957600|26957743|26963341|26963455_UP
ENSG00000167925|GHDC|chr17|-|A3SS|42192905|42193101|42192905|42193027|42193316|42193594	0.128	ENSG00000167925|GHDC|chr17|-|A3SS|42192905|42193101|42192905|42193027|42193316|42193594_UP
ENSG00000089022|MAPKAPK5|chr12|+|SE|111882789|111882853|111880446|111880527|111883580|111883768	0.128	ENSG00000089022|MAPKAPK5|chr12|+|SE|111882789|111882853|111880446|111880527|111883580|111883768_UP
ENSG00000130935|NOL11|chr17|+|RI|67737507|67737972|67737507|67737692|67737846|67737972	0.128	ENSG00000130935|NOL11|chr17|+|RI|67737507|67737972|67737507|67737692|67737846|67737972_UP
ENSG00000134186|PRPF38B|chr1|+|SE|108693589|108693642|108692326|108692867|108695701|108695770	0.128	ENSG00000134186|PRPF38B|chr1|+|SE|108693589|108693642|108692326|108692867|108695701|108695770_UP
ENSG00000135597|REPS1|chr6|-|A5SS|138926400|138930098|138929976|138930098|138921036|138921124	0.128	ENSG00000135597|REPS1|chr6|-|A5SS|138926400|138930098|138929976|138930098|138921036|138921124_UP
ENSG00000122912|SLC25A16|chr10|-|SE|68517083|68517185|68516750|68516843|68527245|68527438	0.128	ENSG00000122912|SLC25A16|chr10|-|SE|68517083|68517185|68516750|68516843|68527245|68527438_UP
ENSG00000128595|CALU|chr7|+|MXE|128754261|128754455|128754528|128754722|128748572|128748804|128758870|128759037	0.129	ENSG00000128595|CALU|chr7|+|MXE|128754261|128754455|128754528|128754722|128748572|128748804|128758870|128759037_UP
ENSG00000172889|EGFL7|chr9|+|SE|136668240|136668362|136664691|136664785|136668556|136668673	0.129	ENSG00000172889|EGFL7|chr9|+|SE|136668240|136668362|136664691|136664785|136668556|136668673_UP
ENSG00000148180|GSN|chr9|+|MXE|121282438|121282550|121300055|121300126|121281469|121281562|121301962|121302167	0.129	ENSG00000148180|GSN|chr9|+|MXE|121282438|121282550|121300055|121300126|121281469|121281562|121301962|121302167_UP
ENSG00000014914|MTMR11|chr1|-|RI|149930364|149930965|149930364|149930547|149930791|149930965	0.129	ENSG00000014914|MTMR11|chr1|-|RI|149930364|149930965|149930364|149930547|149930791|149930965_UP
ENSG00000109180|OCIAD1|chr4|+|SE|48831226|48831496|48831062|48831141|48832619|48832682	0.129	ENSG00000109180|OCIAD1|chr4|+|SE|48831226|48831496|48831062|48831141|48832619|48832682_UP
ENSG00000135597|REPS1|chr6|-|SE|138926400|138926478|138921036|138921124|138929976|138929997	0.129	ENSG00000135597|REPS1|chr6|-|SE|138926400|138926478|138921036|138921124|138929976|138929997_UP
ENSG00000225697|SLC26A6|chr3|-|A3SS|48632973|48633125|48632973|48633084|48633250|48633390	0.129	ENSG00000225697|SLC26A6|chr3|-|A3SS|48632973|48633125|48632973|48633084|48633250|48633390_UP
ENSG00000198198|SZT2|chr1|+|SE|43432061|43432180|43431715|43431901|43432271|43432439	0.129	ENSG00000198198|SZT2|chr1|+|SE|43432061|43432180|43431715|43431901|43432271|43432439_UP
ENSG00000137411|VARS2|chr6|+|SE|30921924|30921995|30921588|30921691|30922115|30922241	0.129	ENSG00000137411|VARS2|chr6|+|SE|30921924|30921995|30921588|30921691|30922115|30922241_UP
ENSG00000073331|ALPK1|chr4|+|A3SS|112423725|112424003|112423943|112424003|112411826|112412025	0.13	ENSG00000073331|ALPK1|chr4|+|A3SS|112423725|112424003|112423943|112424003|112411826|112412025_UP
ENSG00000130734|ATG4D|chr19|+|A5SS|10546838|10547115|10546838|10547071|10547188|10547253	0.13	ENSG00000130734|ATG4D|chr19|+|A5SS|10546838|10547115|10546838|10547071|10547188|10547253_UP
ENSG00000084774|CAD|chr2|+|RI|27233311|27233808|27233311|27233536|27233625|27233808	0.13	ENSG00000084774|CAD|chr2|+|RI|27233311|27233808|27233311|27233536|27233625|27233808_UP
ENSG00000099622|CIRBP|chr19|+|RI|1271139|1271632|1271139|1271467|1271550|1271632	0.13	ENSG00000099622|CIRBP|chr19|+|RI|1271139|1271632|1271139|1271467|1271550|1271632_UP
ENSG00000146192|FGD2|chr6|+|RI|37013608|37014100|37013608|37013765|37013961|37014100	0.13	ENSG00000146192|FGD2|chr6|+|RI|37013608|37014100|37013608|37013765|37013961|37014100_UP
ENSG00000197063|MAFG|chr17|-|SE|81923352|81923416|81923149|81923214|81927527|81927708	0.13	ENSG00000197063|MAFG|chr17|-|SE|81923352|81923416|81923149|81923214|81927527|81927708_UP
ENSG00000070501|POLB|chr8|+|SE|42354416|42354521|42352518|42352568|42355515|42355567	0.13	ENSG00000070501|POLB|chr8|+|SE|42354416|42354521|42352518|42352568|42355515|42355567_UP
ENSG00000122912|SLC25A16|chr10|-|SE|68517083|68517265|68516750|68516843|68527245|68527416	0.13	ENSG00000122912|SLC25A16|chr10|-|SE|68517083|68517265|68516750|68516843|68527245|68527416_UP
ENSG00000049618|ARID1B|chr6|+|SE|157174846|157175005|157172775|157174117|157180968|157180994	0.131	ENSG00000049618|ARID1B|chr6|+|SE|157174846|157175005|157172775|157174117|157180968|157180994_UP
ENSG00000017260|ATP2C1|chr3|+|SE|130894707|130894775|130893990|130894337|130930415|130930526	0.131	ENSG00000017260|ATP2C1|chr3|+|SE|130894707|130894775|130893990|130894337|130930415|130930526_UP
ENSG00000123595|RAB9A|chrX|+|SE|13703734|13703902|13689160|13689288|13708720|13708817	0.131	ENSG00000123595|RAB9A|chrX|+|SE|13703734|13703902|13689160|13689288|13708720|13708817_UP
ENSG00000265241|RBM8A|chr1|-|RI|145926808|145927077|145926808|145926883|145927017|145927077	0.131	ENSG00000265241|RBM8A|chr1|-|RI|145926808|145927077|145926808|145926883|145927017|145927077_UP
ENSG00000237298|TTN-AS1|chr2|+|SE|178537360|178537447|178535731|178535828|178537603|178537691	0.131	ENSG00000237298|TTN-AS1|chr2|+|SE|178537360|178537447|178535731|178535828|178537603|178537691_UP
ENSG00000179335|CLK3|chr15|+|RI|74620008|74622216|74620008|74620225|74622119|74622216	0.132	ENSG00000179335|CLK3|chr15|+|RI|74620008|74622216|74620008|74620225|74622119|74622216_UP
ENSG00000245694|CRNDE|chr16|-|A3SS|54920297|54920410|54920297|54920327|54923584|54923650	0.132	ENSG00000245694|CRNDE|chr16|-|A3SS|54920297|54920410|54920297|54920327|54923584|54923650_UP
ENSG00000140853|NLRC5|chr16|+|SE|57055432|57055519|57055031|57055094|57058064|57058148	0.132	ENSG00000140853|NLRC5|chr16|+|SE|57055432|57055519|57055031|57055094|57058064|57058148_UP
ENSG00000143398|PIP5K1A|chr1|+|SE|151242122|151242269|151239954|151240039|151242437|151242567	0.132	ENSG00000143398|PIP5K1A|chr1|+|SE|151242122|151242269|151239954|151240039|151242437|151242567_UP
ENSG00000196262|PPIA|chr7|+|A5SS|44798747|44798904|44798747|44798814|44799246|44799277	0.132	ENSG00000196262|PPIA|chr7|+|A5SS|44798747|44798904|44798747|44798814|44799246|44799277_UP
ENSG00000182557|SPNS3|chr17|+|SE|4445031|4445168|4439657|4439723|4446047|4446199	0.132	ENSG00000182557|SPNS3|chr17|+|SE|4445031|4445168|4439657|4439723|4446047|4446199_UP
ENSG00000177989|ODF3B|chr22|-|A3SS|50531190|50531341|50531190|50531295|50531569|50531773	0.133	ENSG00000177989|ODF3B|chr22|-|A3SS|50531190|50531341|50531190|50531295|50531569|50531773_UP
ENSG00000093134|VNN3|chr6|-|SE|132731374|132731527|132728740|132728979|132734252|132734333	0.133	ENSG00000093134|VNN3|chr6|-|SE|132731374|132731527|132728740|132728979|132734252|132734333_UP
ENSG00000161692|DBF4B|chr17|+|SE|44709303|44709366|44708607|44708839|44722879|44723022	0.134	ENSG00000161692|DBF4B|chr17|+|SE|44709303|44709366|44708607|44708839|44722879|44723022_UP
ENSG00000156504|FAM122B|chrX|-|A3SS|134769566|134772283|134769566|134771354|134781820|134781917	0.134	ENSG00000156504|FAM122B|chrX|-|A3SS|134769566|134772283|134769566|134771354|134781820|134781917_UP
ENSG00000165948|IFI27L1|chr14|+|SE|94100738|94100771|94096840|94096965|94102476|94102709	0.134	ENSG00000165948|IFI27L1|chr14|+|SE|94100738|94100771|94096840|94096965|94102476|94102709_UP
ENSG00000143624|INTS3|chr1|+|SE|153761019|153761109|153760826|153760918|153761569|153761676	0.134	ENSG00000143624|INTS3|chr1|+|SE|153761019|153761109|153760826|153760918|153761569|153761676_UP
ENSG00000160593|JAML|chr11|-|SE|118214823|118214886|118212406|118212561|118224940|118224994	0.134	ENSG00000160593|JAML|chr11|-|SE|118214823|118214886|118212406|118212561|118224940|118224994_UP
ENSG00000130731|METTL26|chr16|-|SE|634888|634956|634718|634797|635280|635340	0.134	ENSG00000130731|METTL26|chr16|-|SE|634888|634956|634718|634797|635280|635340_UP
ENSG00000146872|TLK2|chr17|+|SE|62597219|62597258|62596584|62596674|62600650|62600767	0.134	ENSG00000146872|TLK2|chr17|+|SE|62597219|62597258|62596584|62596674|62600650|62600767_UP
ENSG00000198039|ZNF273|chr7|+|SE|64917029|64917118|64903287|64903419|64917580|64917707	0.134	ENSG00000198039|ZNF273|chr7|+|SE|64917029|64917118|64903287|64903419|64917580|64917707_UP
ENSG00000114416|FXR1|chr3|+|SE|180975312|180975404|180970157|180970358|180976121|180976282	0.135	ENSG00000114416|FXR1|chr3|+|SE|180975312|180975404|180970157|180970358|180976121|180976282_UP
ENSG00000072571|HMMR|chr5|+|SE|163467703|163467748|163464722|163464802|163469640|163469829	0.135	ENSG00000072571|HMMR|chr5|+|SE|163467703|163467748|163464722|163464802|163469640|163469829_UP
ENSG00000114098|ARMC8|chr3|+|SE|138188454|138188530|138187266|138187599|138221925|138221997	0.136	ENSG00000114098|ARMC8|chr3|+|SE|138188454|138188530|138187266|138187599|138221925|138221997_UP
ENSG00000178467|P4HTM|chr3|+|RI|49004860|49005867|49004860|49005046|49005776|49005867	0.136	ENSG00000178467|P4HTM|chr3|+|RI|49004860|49005867|49004860|49005046|49005776|49005867_UP
ENSG00000115020|PIKFYVE|chr2|+|SE|208274017|208274053|208273583|208273733|208276711|208276830	0.136	ENSG00000115020|PIKFYVE|chr2|+|SE|208274017|208274053|208273583|208273733|208276711|208276830_UP
ENSG00000136040|PLXNC1|chr12|+|SE|94259336|94259375|94255192|94255296|94259609|94259734	0.136	ENSG00000136040|PLXNC1|chr12|+|SE|94259336|94259375|94255192|94255296|94259609|94259734_UP
ENSG00000144559|TAMM41|chr3|-|SE|11844890|11845096|11844028|11844211|11846501|11846885	0.136	ENSG00000144559|TAMM41|chr3|-|SE|11844890|11845096|11844028|11844211|11846501|11846885_UP
ENSG00000175463|TBC1D10C|chr11|+|A5SS|67406626|67406738|67406626|67406692|67406826|67407016	0.136	ENSG00000175463|TBC1D10C|chr11|+|A5SS|67406626|67406738|67406626|67406692|67406826|67407016_UP
ENSG00000168488|ATXN2L|chr16|+|A5SS|28835932|28836485|28835932|28836122|28836727|28837237	0.137	ENSG00000168488|ATXN2L|chr16|+|A5SS|28835932|28836485|28835932|28836122|28836727|28837237_UP
ENSG00000140632|GLYR1|chr16|-|A3SS|4814536|4814647|4814536|4814629|4817597|4817697	0.137	ENSG00000140632|GLYR1|chr16|-|A3SS|4814536|4814647|4814536|4814629|4817597|4817697_UP
ENSG00000144674|GOLGA4|chr3|+|SE|37361242|37361305|37355100|37355187|37366079|37366751	0.137	ENSG00000144674|GOLGA4|chr3|+|SE|37361242|37361305|37355100|37355187|37366079|37366751_UP
ENSG00000104419|NDRG1|chr8|-|SE|133255269|133255400|133254538|133254595|133256776|133256863	0.137	ENSG00000104419|NDRG1|chr8|-|SE|133255269|133255400|133254538|133254595|133256776|133256863_UP
ENSG00000099999|RNF215|chr22|-|RI|30379481|30379780|30379481|30379622|30379710|30379780	0.137	ENSG00000099999|RNF215|chr22|-|RI|30379481|30379780|30379481|30379622|30379710|30379780_UP
ENSG00000125089|SH3TC1|chr4|+|RI|8235432|8237670|8235432|8235555|8236277|8237670	0.137	ENSG00000125089|SH3TC1|chr4|+|RI|8235432|8237670|8235432|8235555|8236277|8237670_UP
ENSG00000158062|UBXN11|chr1|-|SE|26303042|26303167|26302812|26302918|26306591|26306636	0.137	ENSG00000158062|UBXN11|chr1|-|SE|26303042|26303167|26302812|26302918|26306591|26306636_UP
ENSG00000196118|CCDC189|chr16|-|A3SS|30759653|30759809|30759653|30759724|30760283|30760668	0.138	ENSG00000196118|CCDC189|chr16|-|A3SS|30759653|30759809|30759653|30759724|30760283|30760668_UP
ENSG00000175029|CTBP2|chr10|-|SE|125110989|125111093|125038996|125039155|125160318|125160513	0.138	ENSG00000175029|CTBP2|chr10|-|SE|125110989|125111093|125038996|125039155|125160318|125160513_UP
ENSG00000137841|PLCB2|chr15|-|SE|40291605|40291650|40291264|40291487|40291848|40291924	0.138	ENSG00000137841|PLCB2|chr15|-|SE|40291605|40291650|40291264|40291487|40291848|40291924_UP
ENSG00000122008|POLK|chr5|+|SE|75596221|75597178|75590343|75590440|75597746|75597789	0.138	ENSG00000122008|POLK|chr5|+|SE|75596221|75597178|75590343|75590440|75597746|75597789_UP
ENSG00000111247|RAD51AP1|chr12|+|MXE|4545218|4545312|4545781|4545832|4543762|4543904|4546308|4546418	0.138	ENSG00000111247|RAD51AP1|chr12|+|MXE|4545218|4545312|4545781|4545832|4543762|4543904|4546308|4546418_UP
ENSG00000168936|TMEM129|chr4|-|SE|1717515|1717675|1715952|1717428|1718151|1718626	0.138	ENSG00000168936|TMEM129|chr4|-|SE|1717515|1717675|1715952|1717428|1718151|1718626_UP
ENSG00000160087|UBE2J2|chr1|-|SE|1267732|1267992|1263345|1263386|1273665|1273815	0.138	ENSG00000160087|UBE2J2|chr1|-|SE|1267732|1267992|1263345|1263386|1273665|1273815_UP
ENSG00000103005|USB1|chr16|+|SE|58014272|58014294|58009928|58010112|58017333|58017439	0.138	ENSG00000103005|USB1|chr16|+|SE|58014272|58014294|58009928|58010112|58017333|58017439_UP
ENSG00000163161|ERCC3|chr2|-|RI|127289336|127289824|127289336|127289519|127289688|127289824	0.139	ENSG00000163161|ERCC3|chr2|-|RI|127289336|127289824|127289336|127289519|127289688|127289824_UP
ENSG00000078403|MLLT10|chr10|+|MXE|21557620|21557824|21571974|21572026|21538832|21538912|21586293|21586348	0.139	ENSG00000078403|MLLT10|chr10|+|MXE|21557620|21557824|21571974|21572026|21538832|21538912|21586293|21586348_UP
ENSG00000154889|MPPE1|chr18|-|SE|11886498|11886778|11885675|11885816|11886916|11887025	0.139	ENSG00000154889|MPPE1|chr18|-|SE|11886498|11886778|11885675|11885816|11886916|11887025_UP
ENSG00000137404|NRM|chr6|-|SE|30689275|30689452|30688046|30688942|30690046|30690243	0.139	ENSG00000137404|NRM|chr6|-|SE|30689275|30689452|30688046|30688942|30690046|30690243_UP
ENSG00000144283|PKP4|chr2|+|SE|158533437|158533534|158533179|158533316|158577270|158577383	0.139	ENSG00000144283|PKP4|chr2|+|SE|158533437|158533534|158533179|158533316|158577270|158577383_UP
ENSG00000189050|RNFT1|chr17|-|SE|59962539|59962616|59958290|59958444|59962826|59962966	0.139	ENSG00000189050|RNFT1|chr17|-|SE|59962539|59962616|59958290|59958444|59962826|59962966_UP
ENSG00000114573|ATP6V1A|chr3|+|SE|113780731|113780783|113778740|113778835|113781049|113781178	0.14	ENSG00000114573|ATP6V1A|chr3|+|SE|113780731|113780783|113778740|113778835|113781049|113781178_UP
ENSG00000145014|TMEM44|chr3|-|SE|194593040|194593073|194587677|194588639|194604286|194604445	0.14	ENSG00000145014|TMEM44|chr3|-|SE|194593040|194593073|194587677|194588639|194604286|194604445_UP
ENSG00000143951|WDPCP|chr2|-|SE|63571374|63571626|63492855|63492940|63588196|63588518	0.14	ENSG00000143951|WDPCP|chr2|-|SE|63571374|63571626|63492855|63492940|63588196|63588518_UP
ENSG00000170632|ARMC10|chr7|+|SE|103086868|103086937|103086629|103086764|103097276|103097348	0.141	ENSG00000170632|ARMC10|chr7|+|SE|103086868|103086937|103086629|103086764|103097276|103097348_UP
ENSG00000099326|MZF1|chr19|-|RI|58570343|58571429|58570343|58570527|58570993|58571429	0.141	ENSG00000099326|MZF1|chr19|-|RI|58570343|58571429|58570343|58570527|58570993|58571429_UP
ENSG00000198089|SFI1|chr22|+|SE|31528689|31528863|31508254|31508376|31546860|31546971	0.141	ENSG00000198089|SFI1|chr22|+|SE|31528689|31528863|31508254|31508376|31546860|31546971_UP
ENSG00000135596|MICAL1|chr6|-|RI|109451599|109452401|109451599|109451700|109452245|109452401	0.142	ENSG00000135596|MICAL1|chr6|-|RI|109451599|109452401|109451599|109451700|109452245|109452401_UP
ENSG00000102100|SLC35A2|chrX|-|A5SS|48904163|48905482|48904745|48905482|48903179|48903465	0.142	ENSG00000102100|SLC35A2|chrX|-|A5SS|48904163|48905482|48904745|48905482|48903179|48903465_UP
ENSG00000074755|ZZEF1|chr17|-|SE|4071338|4071446|4070778|4070924|4072607|4072756	0.142	ENSG00000074755|ZZEF1|chr17|-|SE|4071338|4071446|4070778|4070924|4072607|4072756_UP
ENSG00000093144|ECHDC1|chr6|-|SE|127316449|127316502|127314815|127314896|127327001|127327137	0.143	ENSG00000093144|ECHDC1|chr6|-|SE|127316449|127316502|127314815|127314896|127327001|127327137_UP
ENSG00000008517|IL32|chr16|+|MXE|3067376|3067415|3067442|3067613|3065783|3065826|3067983|3068010	0.143	ENSG00000008517|IL32|chr16|+|MXE|3067376|3067415|3067442|3067613|3065783|3065826|3067983|3068010_UP
ENSG00000168958|MFF|chr2|+|MXE|227347225|227347384|227352513|227352573|227340291|227340380|227355676|227355761	0.143	ENSG00000168958|MFF|chr2|+|MXE|227347225|227347384|227352513|227352573|227340291|227340380|227355676|227355761_UP
ENSG00000165406|MARCHF8|chr10|-|SE|45463150|45463996|45461230|45461411|45464238|45464327	0.144	ENSG00000165406|MARCHF8|chr10|-|SE|45463150|45463996|45461230|45461411|45464238|45464327_UP
ENSG00000109184|DCUN1D4|chr4|+|SE|51891759|51891851|51886567|51886638|51899269|51899378	0.144	ENSG00000109184|DCUN1D4|chr4|+|SE|51891759|51891851|51886567|51886638|51899269|51899378_UP
ENSG00000105821|DNAJC2|chr7|-|SE|103327331|103327378|103326542|103326684|103327655|103327754	0.144	ENSG00000105821|DNAJC2|chr7|-|SE|103327331|103327378|103326542|103326684|103327655|103327754_UP
ENSG00000122025|FLT3|chr13|-|SE|28025283|28025415|28024860|28024943|28027087|28027241	0.144	ENSG00000122025|FLT3|chr13|-|SE|28025283|28025415|28024860|28024943|28027087|28027241_UP
ENSG00000169592|INO80E|chr16|+|SE|30001464|30001530|30000928|30001040|30005220|30005577	0.144	ENSG00000169592|INO80E|chr16|+|SE|30001464|30001530|30000928|30001040|30005220|30005577_UP
ENSG00000266714|MYO15B|chr17|+|RI|75620466|75621176|75620466|75620636|75621030|75621176	0.144	ENSG00000266714|MYO15B|chr17|+|RI|75620466|75621176|75620466|75620636|75621030|75621176_UP
ENSG00000163930|BAP1|chr3|-|RI|52402778|52403298|52402778|52402940|52403137|52403298	0.145	ENSG00000163930|BAP1|chr3|-|RI|52402778|52403298|52402778|52402940|52403137|52403298_UP
ENSG00000157551|KCNJ15|chr21|+|SE|38298143|38298282|38296925|38297023|38299243|38299319	0.145	ENSG00000157551|KCNJ15|chr21|+|SE|38298143|38298282|38296925|38297023|38299243|38299319_UP
ENSG00000231721|LINC-PINT|chr7|-|SE|130959868|130959970|130945719|130945835|130967388|130967517	0.145	ENSG00000231721|LINC-PINT|chr7|-|SE|130959868|130959970|130945719|130945835|130967388|130967517_UP
ENSG00000147894|C9orf72|chr9|-|RI|27558490|27560299|27558490|27558607|27560226|27560299	0.146	ENSG00000147894|C9orf72|chr9|-|RI|27558490|27560299|27558490|27558607|27560226|27560299_UP
ENSG00000197586|ENTPD6|chr20|+|SE|25207075|25207397|25195692|25195867|25209848|25209925	0.146	ENSG00000197586|ENTPD6|chr20|+|SE|25207075|25207397|25195692|25195867|25209848|25209925_UP
ENSG00000165689|ENTR1|chr9|-|SE|136408998|136409067|136407825|136407938|136410327|136410593	0.146	ENSG00000165689|ENTR1|chr9|-|SE|136408998|136409067|136407825|136407938|136410327|136410593_UP
ENSG00000109586|GALNT7|chr4|+|MXE|173297794|173297977|173298114|173298297|173295763|173295843|173302046|173302164	0.146	ENSG00000109586|GALNT7|chr4|+|MXE|173297794|173297977|173298114|173298297|173295763|173295843|173302046|173302164_UP
ENSG00000110422|HIPK3|chr11|+|SE|33348165|33348228|33347851|33348013|33348521|33348818	0.146	ENSG00000110422|HIPK3|chr11|+|SE|33348165|33348228|33347851|33348013|33348521|33348818_UP
ENSG00000161265|U2AF1L4|chr19|-|RI|35744322|35744738|35744322|35744421|35744625|35744738	0.146	ENSG00000161265|U2AF1L4|chr19|-|RI|35744322|35744738|35744322|35744421|35744625|35744738_UP
ENSG00000175197|DDIT3|chr12|-|RI|57517268|57517753|57517268|57517595|57517705|57517753	0.147	ENSG00000175197|DDIT3|chr12|-|RI|57517268|57517753|57517268|57517595|57517705|57517753_UP
ENSG00000068438|FTSJ1|chrX|+|RI|48482596|48483027|48482596|48482794|48482985|48483027	0.147	ENSG00000068438|FTSJ1|chrX|+|RI|48482596|48483027|48482596|48482794|48482985|48483027_UP
ENSG00000154889|MPPE1|chr18|-|SE|11886498|11886621|11885675|11885816|11886916|11887025	0.147	ENSG00000154889|MPPE1|chr18|-|SE|11886498|11886621|11885675|11885816|11886916|11887025_UP
ENSG00000066117|SMARCD1|chr12|+|SE|50087362|50087485|50086755|50086878|50088520|50088637	0.147	ENSG00000066117|SMARCD1|chr12|+|SE|50087362|50087485|50086755|50086878|50088520|50088637_UP
ENSG00000141480|ARRB2|chr17|+|SE|4718260|4718345|4717887|4718023|4718611|4718684	0.148	ENSG00000141480|ARRB2|chr17|+|SE|4718260|4718345|4717887|4718023|4718611|4718684_UP
ENSG00000169592|INO80E|chr16|+|SE|30001211|30004657|30000928|30001040|30005220|30005774	0.148	ENSG00000169592|INO80E|chr16|+|SE|30001211|30004657|30000928|30001040|30005220|30005774_UP
ENSG00000172766|NAA16|chr13|+|A5SS|41362030|41362873|41362030|41362159|41367438|41367652	0.148	ENSG00000172766|NAA16|chr13|+|A5SS|41362030|41362873|41362030|41362159|41367438|41367652_UP
ENSG00000090905|TNRC6A|chr16|+|RI|24805013|24805733|24805013|24805151|24805673|24805733	0.148	ENSG00000090905|TNRC6A|chr16|+|RI|24805013|24805733|24805013|24805151|24805673|24805733_UP
ENSG00000090905|TNRC6A|chr16|+|SE|24793472|24793649|24789231|24791817|24794543|24794719	0.148	ENSG00000090905|TNRC6A|chr16|+|SE|24793472|24793649|24789231|24791817|24794543|24794719_UP
ENSG00000213983|AP1G2|chr14|-|RI|23562503|23563638|23562503|23562593|23563379|23563638	0.149	ENSG00000213983|AP1G2|chr14|-|RI|23562503|23563638|23562503|23562593|23563379|23563638_UP
ENSG00000092529|CAPN3|chr15|+|SE|42411746|42411979|42411286|42411345|42412085|42412308	0.149	ENSG00000092529|CAPN3|chr15|+|SE|42411746|42411979|42411286|42411345|42412085|42412308_UP
ENSG00000213316|LTC4S|chr5|+|RI|179795583|179795856|179795583|179795683|179795785|179795856	0.149	ENSG00000213316|LTC4S|chr5|+|RI|179795583|179795856|179795583|179795683|179795785|179795856_UP
ENSG00000031823|RANBP3|chr19|-|SE|5950716|5950875|5941798|5941835|5951392|5951596	0.149	ENSG00000031823|RANBP3|chr19|-|SE|5950716|5950875|5941798|5941835|5951392|5951596_UP
ENSG00000018280|SLC11A1|chr2|+|SE|218382959|218383102|218382028|218382375|218385146|218385266	0.149	ENSG00000018280|SLC11A1|chr2|+|SE|218382959|218383102|218382028|218382375|218385146|218385266_UP
ENSG00000163029|SMC6|chr2|-|SE|17753001|17753064|17745826|17745951|17753625|17753829	0.149	ENSG00000163029|SMC6|chr2|-|SE|17753001|17753064|17745826|17745951|17753625|17753829_UP
ENSG00000162222|TTC9C|chr11|+|SE|62733117|62733199|62728822|62729086|62735381|62736243	0.149	ENSG00000162222|TTC9C|chr11|+|SE|62733117|62733199|62728822|62729086|62735381|62736243_UP
ENSG00000185163|DDX51|chr12|-|RI|132140830|132141420|132140830|132141020|132141274|132141420	0.15	ENSG00000185163|DDX51|chr12|-|RI|132140830|132141420|132140830|132141020|132141274|132141420_UP
ENSG00000087460|GNAS|chr20|+|SE|58898940|58898985|58895162|58895684|58903530|58903556	0.15	ENSG00000087460|GNAS|chr20|+|SE|58898940|58898985|58895162|58895684|58903530|58903556_UP
ENSG00000272888|LINC01578|chr15|+|SE|92883584|92883778|92882873|92883186|92885514|92885584	0.15	ENSG00000272888|LINC01578|chr15|+|SE|92883584|92883778|92882873|92883186|92885514|92885584_UP
ENSG00000197249|SERPINA1|chr14|-|SE|94388559|94388663|94382591|94383241|94390456|94390650	0.15	ENSG00000197249|SERPINA1|chr14|-|SE|94388559|94388663|94382591|94383241|94390456|94390650_UP
ENSG00000185917|SETD4|chr21|-|SE|36057383|36057477|36057108|36057204|36058815|36058924	0.15	ENSG00000185917|SETD4|chr21|-|SE|36057383|36057477|36057108|36057204|36058815|36058924_UP
ENSG00000151498|ACAD8|chr11|+|SE|134256547|134256648|134253494|134253709|134257087|134257257	0.151	ENSG00000151498|ACAD8|chr11|+|SE|134256547|134256648|134253494|134253709|134257087|134257257_UP
ENSG00000221978|CCNL2|chr1|-|A3SS|1390765|1392803|1390765|1390865|1393395|1393460	0.151	ENSG00000221978|CCNL2|chr1|-|A3SS|1390765|1392803|1390765|1390865|1393395|1393460_UP
ENSG00000113360|DROSHA|chr5|-|SE|31531449|31531525|31530797|31530924|31531989|31532074	0.151	ENSG00000113360|DROSHA|chr5|-|SE|31531449|31531525|31530797|31530924|31531989|31532074_UP
ENSG00000132581|SDF2|chr17|-|SE|28651485|28651577|28648924|28649276|28655286|28655483	0.151	ENSG00000132581|SDF2|chr17|-|SE|28651485|28651577|28648924|28649276|28655286|28655483_UP
ENSG00000197249|SERPINA1|chr14|-|SE|94388559|94388660|94382591|94383241|94390456|94390662	0.151	ENSG00000197249|SERPINA1|chr14|-|SE|94388559|94388660|94382591|94383241|94390456|94390662_UP
ENSG00000015475|BID|chr22|-|MXE|17743802|17744013|17750104|17750174|17739348|17739488|17774380|17774495	0.152	ENSG00000015475|BID|chr22|-|MXE|17743802|17744013|17750104|17750174|17739348|17739488|17774380|17774495_UP
ENSG00000182446|NPLOC4|chr17|-|SE|81563920|81563979|81559090|81559416|81565504|81565607	0.152	ENSG00000182446|NPLOC4|chr17|-|SE|81563920|81563979|81559090|81559416|81565504|81565607_UP
ENSG00000187800|PEAR1|chr1|+|RI|156907914|156908340|156907914|156908051|156908127|156908340	0.152	ENSG00000187800|PEAR1|chr1|+|RI|156907914|156908340|156907914|156908051|156908127|156908340_UP
ENSG00000009790|TRAF3IP3|chr1|+|A3SS|209779314|209779655|209779430|209779655|209778110|209778173	0.152	ENSG00000009790|TRAF3IP3|chr1|+|A3SS|209779314|209779655|209779430|209779655|209778110|209778173_UP
ENSG00000147852|VLDLR|chr9|+|SE|2651414|2651498|2650369|2650516|2651873|2651954	0.152	ENSG00000147852|VLDLR|chr9|+|SE|2651414|2651498|2650369|2650516|2651873|2651954_UP
ENSG00000234608|MAPKAPK5-AS1|chr12|-|SE|111841326|111841470|111840332|111840477|111841683|111841710	0.153	ENSG00000234608|MAPKAPK5-AS1|chr12|-|SE|111841326|111841470|111840332|111840477|111841683|111841710_UP
ENSG00000125637|PSD4|chr2|+|SE|113198739|113198884|113197194|113197913|113199082|113199226	0.153	ENSG00000125637|PSD4|chr2|+|SE|113198739|113198884|113197194|113197913|113199082|113199226_UP
ENSG00000135597|REPS1|chr6|-|A3SS|138917554|138917646|138917554|138917624|138920214|138920316	0.153	ENSG00000135597|REPS1|chr6|-|A3SS|138917554|138917646|138917554|138917624|138920214|138920316_UP
ENSG00000147465|STAR|chr8|-|RI|38148199|38148754|38148199|38148327|38148640|38148754	0.153	ENSG00000147465|STAR|chr8|-|RI|38148199|38148754|38148199|38148327|38148640|38148754_UP
ENSG00000123636|BAZ2B|chr2|-|SE|159336941|159337077|159332539|159332686|159337566|159337772	0.154	ENSG00000123636|BAZ2B|chr2|-|SE|159336941|159337077|159332539|159332686|159337566|159337772_UP
ENSG00000113360|DROSHA|chr5|-|SE|31521122|31521215|31514987|31515219|31526078|31526912	0.154	ENSG00000113360|DROSHA|chr5|-|SE|31521122|31521215|31514987|31515219|31526078|31526912_UP
ENSG00000213930|GALT|chr9|+|RI|34647491|34647705|34647491|34647567|34647656|34647705	0.154	ENSG00000213930|GALT|chr9|+|RI|34647491|34647705|34647491|34647567|34647656|34647705_UP
ENSG00000198925|ATG9A|chr2|-|SE|219228433|219228482|219227921|219228053|219229534|219229639	0.155	ENSG00000198925|ATG9A|chr2|-|SE|219228433|219228482|219227921|219228053|219229534|219229639_UP
ENSG00000126001|CEP250|chr20|+|SE|35474793|35474852|35474000|35474052|35475501|35475646	0.155	ENSG00000126001|CEP250|chr20|+|SE|35474793|35474852|35474000|35474052|35475501|35475646_UP
ENSG00000215301|DDX3X|chrX|+|RI|41337407|41339083|41337407|41337465|41339038|41339083	0.155	ENSG00000215301|DDX3X|chrX|+|RI|41337407|41339083|41337407|41337465|41339038|41339083_UP
ENSG00000130731|METTL26|chr16|-|SE|634888|635063|634718|634797|635280|635340	0.155	ENSG00000130731|METTL26|chr16|-|SE|634888|635063|634718|634797|635280|635340_UP
ENSG00000011198|ABHD5|chr3|+|SE|43733879|43733963|43718442|43718561|43734049|43734364	0.156	ENSG00000011198|ABHD5|chr3|+|SE|43733879|43733963|43718442|43718561|43734049|43734364_UP
ENSG00000132466|ANKRD17|chr4|-|SE|73139530|73140283|73135116|73135265|73141740|73141792	0.156	ENSG00000132466|ANKRD17|chr4|-|SE|73139530|73140283|73135116|73135265|73141740|73141792_UP
ENSG00000213782|DDX47|chr12|+|RI|12823202|12824677|12823202|12823319|12824539|12824677	0.156	ENSG00000213782|DDX47|chr12|+|RI|12823202|12824677|12823202|12823319|12824539|12824677_UP
ENSG00000197586|ENTPD6|chr20|+|SE|25207078|25207397|25195725|25195867|25209848|25209925	0.156	ENSG00000197586|ENTPD6|chr20|+|SE|25207078|25207397|25195725|25195867|25209848|25209925_UP
ENSG00000138640|FAM13A|chr4|-|SE|88737471|88737555|88731832|88732198|88739029|88739125	0.156	ENSG00000138640|FAM13A|chr4|-|SE|88737471|88737555|88731832|88732198|88739029|88739125_UP
ENSG00000205423|CNEP1R1|chr16|+|SE|50025650|50025701|50024409|50025340|50026395|50026467	0.157	ENSG00000205423|CNEP1R1|chr16|+|SE|50025650|50025701|50024409|50025340|50026395|50026467_UP
ENSG00000087460|GNAS|chr20|+|SE|58898940|58898985|58895162|58895684|58903527|58903585	0.157	ENSG00000087460|GNAS|chr20|+|SE|58898940|58898985|58895162|58895684|58903527|58903585_UP
ENSG00000138434|ITPRID2|chr2|+|RI|181915215|181918675|181915215|181916427|181918597|181918675	0.157	ENSG00000138434|ITPRID2|chr2|+|RI|181915215|181918675|181915215|181916427|181918597|181918675_UP
ENSG00000117859|OSBPL9|chr1|+|SE|51756319|51756358|51750144|51750195|51760689|51760764	0.157	ENSG00000117859|OSBPL9|chr1|+|SE|51756319|51756358|51750144|51750195|51760689|51760764_UP
[truncated: 249 more rows]

## Sheet: MDS_Pellagatti_S34F_DSE
Event_ID	delta_PSI	Event_ID_withdir
ENSG00000177479|ARIH2|chr3|+|MXE|48924717|48924839|48944981|48945181|48922747|48922811|48961611|48961679	-0.82	ENSG00000177479|ARIH2|chr3|+|MXE|48924717|48924839|48944981|48945181|48922747|48922811|48961611|48961679_DN
ENSG00000177479|ARIH2|chr3|+|MXE|48924717|48924839|48945135|48945181|48922747|48922811|48961611|48961679	-0.766	ENSG00000177479|ARIH2|chr3|+|MXE|48924717|48924839|48945135|48945181|48922747|48922811|48961611|48961679_DN
ENSG00000109113|RAB34|chr17|-|A3SS|28717212|28717425|28717212|28717291|28718121|28718268	-0.623	ENSG00000109113|RAB34|chr17|-|A3SS|28717212|28717425|28717212|28717291|28718121|28718268_DN
ENSG00000100360|IFT27|chr22|-|RI|36775673|36776125|36775673|36775794|36776030|36776125	-0.576	ENSG00000100360|IFT27|chr22|-|RI|36775673|36776125|36775673|36775794|36776030|36776125_DN
ENSG00000177409|SAMD9L|chr7|-|SE|93146882|93147146|93145384|93146040|93148193|93148345	-0.556	ENSG00000177409|SAMD9L|chr7|-|SE|93146882|93147146|93145384|93146040|93148193|93148345_DN
ENSG00000157881|PANK4|chr1|-|A3SS|2510677|2510782|2510677|2510748|2511337|2511387	-0.544	ENSG00000157881|PANK4|chr1|-|A3SS|2510677|2510782|2510677|2510748|2511337|2511387_DN
ENSG00000135317|SNX14|chr6|-|SE|85538837|85538864|85536791|85536924|85541984|85542043	-0.515	ENSG00000135317|SNX14|chr6|-|SE|85538837|85538864|85536791|85536924|85541984|85542043_DN
ENSG00000177409|SAMD9L|chr7|-|SE|93147087|93147146|93145384|93146040|93148193|93148345	-0.509	ENSG00000177409|SAMD9L|chr7|-|SE|93147087|93147146|93145384|93146040|93148193|93148345_DN
ENSG00000137959|IFI44L|chr1|+|SE|78627905|78628393|78620402|78620571|78628950|78628999	-0.494	ENSG00000137959|IFI44L|chr1|+|SE|78627905|78628393|78620402|78620571|78628950|78628999_DN
ENSG00000174547|MRPL11|chr11|-|A5SS|66438631|66438848|66438709|66438848|66438163|66438259	-0.492	ENSG00000174547|MRPL11|chr11|-|A5SS|66438631|66438848|66438709|66438848|66438163|66438259_DN
ENSG00000133943|DGLUCY|chr14|+|A5SS|91170002|91170201|91170002|91170186|91173288|91173439	-0.474	ENSG00000133943|DGLUCY|chr14|+|A5SS|91170002|91170201|91170002|91170186|91173288|91173439_DN
ENSG00000163738|MTHFD2L|chr4|+|SE|74160054|74160088|74158107|74158281|74174505|74174690	-0.466	ENSG00000163738|MTHFD2L|chr4|+|SE|74160054|74160088|74158107|74158281|74174505|74174690_DN
ENSG00000147804|SLC39A4|chr8|-|SE|144413236|144413389|144410394|144412946|144413512|144413567	-0.465	ENSG00000147804|SLC39A4|chr8|-|SE|144413236|144413389|144410394|144412946|144413512|144413567_DN
ENSG00000173915|ATP5MD|chr10|-|SE|103395745|103396032|103394198|103394394|103396408|103396441	-0.464	ENSG00000173915|ATP5MD|chr10|-|SE|103395745|103396032|103394198|103394394|103396408|103396441_DN
ENSG00000075826|SEC31B|chr10|-|SE|100500109|100500159|100499523|100499598|100502253|100502484	-0.463	ENSG00000075826|SEC31B|chr10|-|SE|100500109|100500159|100499523|100499598|100502253|100502484_DN
ENSG00000271147|ARMCX5-GPRASP2|chrX|+|SE|102601879|102601977|102601463|102601509|102605481|102605653	-0.459	ENSG00000271147|ARMCX5-GPRASP2|chrX|+|SE|102601879|102601977|102601463|102601509|102605481|102605653_DN
ENSG00000197579|TOPORS|chr9|-|SE|32550773|32550968|32540543|32544326|32552433|32552553	-0.447	ENSG00000197579|TOPORS|chr9|-|SE|32550773|32550968|32540543|32544326|32552433|32552553_DN
ENSG00000122417|ODF2L|chr1|-|SE|86356443|86356602|86354773|86354859|86358786|86358891	-0.417	ENSG00000122417|ODF2L|chr1|-|SE|86356443|86356602|86354773|86354859|86358786|86358891_DN
ENSG00000132781|MUTYH|chr1|-|A3SS|45333412|45333594|45333412|45333564|45334390|45334511	-0.412	ENSG00000132781|MUTYH|chr1|-|A3SS|45333412|45333594|45333412|45333564|45334390|45334511_DN
ENSG00000015475|BID|chr22|-|SE|17750104|17750174|17739348|17739488|17774380|17774412	-0.41	ENSG00000015475|BID|chr22|-|SE|17750104|17750174|17739348|17739488|17774380|17774412_DN
ENSG00000162298|SYVN1|chr11|-|A3SS|65130001|65130175|65130001|65130172|65130250|65130379	-0.409	ENSG00000162298|SYVN1|chr11|-|A3SS|65130001|65130175|65130001|65130172|65130250|65130379_DN
ENSG00000167840|ZNF232|chr17|-|SE|5111075|5111219|5108925|5109868|5111799|5111815	-0.408	ENSG00000167840|ZNF232|chr17|-|SE|5111075|5111219|5108925|5109868|5111799|5111815_DN
ENSG00000198276|UCKL1|chr20|-|SE|63943652|63943669|63941109|63941208|63944396|63944458	-0.407	ENSG00000198276|UCKL1|chr20|-|SE|63943652|63943669|63941109|63941208|63944396|63944458_DN
ENSG00000117400|MPL|chr1|+|A3SS|43338098|43338231|43338119|43338231|43337848|43337927	-0.399	ENSG00000117400|MPL|chr1|+|A3SS|43338098|43338231|43338119|43338231|43337848|43337927_DN
ENSG00000148187|MRRF|chr9|+|RI|122285168|122285946|122285168|122285287|122285779|122285946	-0.389	ENSG00000148187|MRRF|chr9|+|RI|122285168|122285946|122285168|122285287|122285779|122285946_DN
ENSG00000162086|ZNF75A|chr16|+|SE|3313048|3313175|3312676|3312768|3316911|3316924	-0.384	ENSG00000162086|ZNF75A|chr16|+|SE|3313048|3313175|3312676|3312768|3316911|3316924_DN
ENSG00000166435|XRRA1|chr11|-|SE|74945017|74945085|74936883|74937068|74948927|74949075	-0.381	ENSG00000166435|XRRA1|chr11|-|SE|74945017|74945085|74936883|74937068|74948927|74949075_DN
ENSG00000197694|SPTAN1|chr9|+|SE|128609650|128609665|128609121|128609284|128611713|128611845	-0.378	ENSG00000197694|SPTAN1|chr9|+|SE|128609650|128609665|128609121|128609284|128611713|128611845_DN
ENSG00000142046|TMEM91|chr19|+|A3SS|41383714|41384083|41383885|41384083|41382771|41382921	-0.378	ENSG00000142046|TMEM91|chr19|+|A3SS|41383714|41384083|41383885|41384083|41382771|41382921_DN
ENSG00000126453|BCL2L12|chr19|+|SE|49670215|49670488|49669023|49669115|49673697|49673859	-0.377	ENSG00000126453|BCL2L12|chr19|+|SE|49670215|49670488|49669023|49669115|49673697|49673859_DN
ENSG00000169519|METTL15|chr11|+|A3SS|28296752|28296931|28296796|28296931|28290205|28290397	-0.377	ENSG00000169519|METTL15|chr11|+|A3SS|28296752|28296931|28296796|28296931|28290205|28290397_DN
ENSG00000181938|GINS3|chr16|+|SE|58403097|58403331|58392393|58392787|58404498|58405481	-0.374	ENSG00000181938|GINS3|chr16|+|SE|58403097|58403331|58392393|58392787|58404498|58405481_DN
ENSG00000105655|ISYNA1|chr19|-|MXE|18436683|18436877|18437598|18437760|18436329|18436479|18437859|18437988	-0.374	ENSG00000105655|ISYNA1|chr19|-|MXE|18436683|18436877|18437598|18437760|18436329|18436479|18437859|18437988_DN
ENSG00000142046|TMEM91|chr19|+|RI|41382771|41384083|41382771|41382921|41383885|41384083	-0.368	ENSG00000142046|TMEM91|chr19|+|RI|41382771|41384083|41382771|41382921|41383885|41384083_DN
ENSG00000087470|DNM1L|chr12|+|SE|32737864|32737942|32737104|32737161|32740063|32740240	-0.363	ENSG00000087470|DNM1L|chr12|+|SE|32737864|32737942|32737104|32737161|32740063|32740240_DN
ENSG00000035141|FAM136A|chr2|-|RI|70300839|70301603|70300839|70300980|70301407|70301603	-0.363	ENSG00000035141|FAM136A|chr2|-|RI|70300839|70301603|70300839|70300980|70301407|70301603_DN
ENSG00000142046|TMEM91|chr19|+|A3SS|41383560|41384083|41383885|41384083|41382771|41382921	-0.352	ENSG00000142046|TMEM91|chr19|+|A3SS|41383560|41384083|41383885|41384083|41382771|41382921_DN
ENSG00000143702|CEP170|chr1|-|A3SS|243156220|243156455|243156220|243156347|243164283|243166116	-0.349	ENSG00000143702|CEP170|chr1|-|A3SS|243156220|243156455|243156220|243156347|243164283|243166116_DN
ENSG00000051382|PIK3CB|chr3|-|MXE|138704442|138704493|138707158|138707289|138698906|138699095|138712207|138712304	-0.346	ENSG00000051382|PIK3CB|chr3|-|MXE|138704442|138704493|138707158|138707289|138698906|138699095|138712207|138712304_DN
ENSG00000110514|MADD|chr11|+|A5SS|47295495|47295576|47295495|47295567|47295896|47296055	-0.343	ENSG00000110514|MADD|chr11|+|A5SS|47295495|47295576|47295495|47295567|47295896|47296055_DN
ENSG00000168564|CDKN2AIP|chr4|+|A5SS|183445534|183445665|183445534|183445634|183446087|183448198	-0.339	ENSG00000168564|CDKN2AIP|chr4|+|A5SS|183445534|183445665|183445534|183445634|183446087|183448198_DN
ENSG00000075826|SEC31B|chr10|-|A3SS|100507907|100508051|100507907|100508048|100509006|100509102	-0.339	ENSG00000075826|SEC31B|chr10|-|A3SS|100507907|100508051|100507907|100508048|100509006|100509102_DN
ENSG00000090674|MCOLN1|chr19|+|RI|7527519|7527960|7527519|7527628|7527863|7527960	-0.334	ENSG00000090674|MCOLN1|chr19|+|RI|7527519|7527960|7527519|7527628|7527863|7527960_DN
ENSG00000140199|SLC12A6|chr15|-|SE|34257641|34257788|34256228|34256283|34258812|34258944	-0.329	ENSG00000140199|SLC12A6|chr15|-|SE|34257641|34257788|34256228|34256283|34258812|34258944_DN
ENSG00000169762|TAPT1|chr4|-|SE|16170652|16170729|16166632|16166793|16174203|16174272	-0.326	ENSG00000169762|TAPT1|chr4|-|SE|16170652|16170729|16166632|16166793|16174203|16174272_DN
ENSG00000091409|ITGA6|chr2|+|SE|172501771|172501901|172497974|172498100|172504090|172504534	-0.324	ENSG00000091409|ITGA6|chr2|+|SE|172501771|172501901|172497974|172498100|172504090|172504534_DN
ENSG00000129158|SERGEF|chr11|-|SE|17959469|17959636|17878207|17878244|17988596|17988755	-0.322	ENSG00000129158|SERGEF|chr11|-|SE|17959469|17959636|17878207|17878244|17988596|17988755_DN
ENSG00000213983|AP1G2|chr14|-|SE|23566561|23566686|23566277|23566419|23567110|23567315	-0.321	ENSG00000213983|AP1G2|chr14|-|SE|23566561|23566686|23566277|23566419|23567110|23567315_DN
ENSG00000168237|GLYCTK|chr3|+|RI|52290959|52291922|52290959|52291111|52291746|52291922	-0.321	ENSG00000168237|GLYCTK|chr3|+|RI|52290959|52291922|52290959|52291111|52291746|52291922_DN
ENSG00000132549|VPS13B|chr8|+|SE|99507136|99507203|99502835|99502950|99507769|99507911	-0.321	ENSG00000132549|VPS13B|chr8|+|SE|99507136|99507203|99502835|99502950|99507769|99507911_DN
ENSG00000143363|PRUNE1|chr1|+|SE|151018466|151018669|151017811|151017904|151024610|151024795	-0.32	ENSG00000143363|PRUNE1|chr1|+|SE|151018466|151018669|151017811|151017904|151024610|151024795_DN
ENSG00000142453|CARM1|chr19|+|SE|10921374|10921443|10921049|10921127|10921614|10921900	-0.312	ENSG00000142453|CARM1|chr19|+|SE|10921374|10921443|10921049|10921127|10921614|10921900_DN
ENSG00000111206|FOXM1|chr12|-|SE|2865354|2865399|2864682|2864752|2866392|2866521	-0.312	ENSG00000111206|FOXM1|chr12|-|SE|2865354|2865399|2864682|2864752|2866392|2866521_DN
ENSG00000214655|ZSWIM8|chr10|+|RI|73800639|73801195|73800639|73800759|73801084|73801195	-0.312	ENSG00000214655|ZSWIM8|chr10|+|RI|73800639|73801195|73800639|73800759|73801084|73801195_DN
ENSG00000064012|CASP8|chr2|+|A3SS|201266460|201266791|201266486|201266791|201234015|201234112	-0.308	ENSG00000064012|CASP8|chr2|+|A3SS|201266460|201266791|201266486|201266791|201234015|201234112_DN
ENSG00000228315|GUSBP11|chr22|-|SE|23700725|23700845|23694118|23695517|23705428|23705541	-0.307	ENSG00000228315|GUSBP11|chr22|-|SE|23700725|23700845|23694118|23695517|23705428|23705541_DN
ENSG00000005189|REXO5|chr16|+|A3SS|20814926|20815053|20814984|20815053|20813189|20813302	-0.307	ENSG00000005189|REXO5|chr16|+|A3SS|20814926|20815053|20814984|20815053|20813189|20813302_DN
ENSG00000100897|DCAF11|chr14|+|A5SS|24115514|24115749|24115514|24115726|24116971|24117044	-0.303	ENSG00000100897|DCAF11|chr14|+|A5SS|24115514|24115749|24115514|24115726|24116971|24117044_DN
ENSG00000139629|GALNT6|chr12|-|SE|51382312|51382509|51379663|51379884|51383460|51383582	-0.302	ENSG00000139629|GALNT6|chr12|-|SE|51382312|51382509|51379663|51379884|51383460|51383582_DN
ENSG00000131165|CHMP1A|chr16|-|SE|89653903|89653923|89651568|89651646|89657581|89657605	-0.3	ENSG00000131165|CHMP1A|chr16|-|SE|89653903|89653923|89651568|89651646|89657581|89657605_DN
ENSG00000105443|CYTH2|chr19|+|SE|48477716|48477719|48474837|48474949|48478068|48478145	-0.298	ENSG00000105443|CYTH2|chr19|+|SE|48477716|48477719|48474837|48474949|48478068|48478145_DN
ENSG00000132781|MUTYH|chr1|-|A3SS|45333412|45333603|45333412|45333564|45334390|45334511	-0.298	ENSG00000132781|MUTYH|chr1|-|A3SS|45333412|45333603|45333412|45333564|45334390|45334511_DN
ENSG00000177479|ARIH2|chr3|+|MXE|48924717|48924839|48927461|48927813|48922747|48922811|48961611|48961679	-0.295	ENSG00000177479|ARIH2|chr3|+|MXE|48924717|48924839|48927461|48927813|48922747|48922811|48961611|48961679_DN
ENSG00000167110|GOLGA2|chr9|-|SE|128272784|128272865|128268419|128268524|128273849|128273972	-0.295	ENSG00000167110|GOLGA2|chr9|-|SE|128272784|128272865|128268419|128268524|128273849|128273972_DN
ENSG00000149554|CHEK1|chr11|+|SE|125627606|125627830|125626557|125626833|125629231|125629296	-0.292	ENSG00000149554|CHEK1|chr11|+|SE|125627606|125627830|125626557|125626833|125629231|125629296_DN
ENSG00000138326|RPS24|chr10|+|SE|78040203|78040225|78037193|78037304|78040614|78040696	-0.292	ENSG00000138326|RPS24|chr10|+|SE|78040203|78040225|78037193|78037304|78040614|78040696_DN
ENSG00000067445|TRO|chrX|+|RI|54928602|54931031|54928602|54928710|54930740|54931031	-0.291	ENSG00000067445|TRO|chrX|+|RI|54928602|54931031|54928602|54928710|54930740|54931031_DN
ENSG00000170264|FAM161A|chr2|-|A3SS|61839420|61840581|61839420|61840525|61842121|61842360	-0.29	ENSG00000170264|FAM161A|chr2|-|A3SS|61839420|61840581|61839420|61840525|61842121|61842360_DN
ENSG00000132950|ZMYM5|chr13|-|RI|19851354|19852190|19851354|19851448|19851688|19852190	-0.285	ENSG00000132950|ZMYM5|chr13|-|RI|19851354|19852190|19851354|19851448|19851688|19852190_DN
ENSG00000087470|DNM1L|chr12|+|SE|32737864|32737942|32737104|32737161|32738263|32738296	-0.283	ENSG00000087470|DNM1L|chr12|+|SE|32737864|32737942|32737104|32737161|32738263|32738296_DN
ENSG00000184584|TMEM173|chr5|-|SE|139477328|139477515|139475533|139476454|139478269|139478508	-0.28	ENSG00000184584|TMEM173|chr5|-|SE|139477328|139477515|139475533|139476454|139478269|139478508_DN
ENSG00000164039|BDH2|chr4|-|RI|103085348|103086540|103085348|103085462|103085698|103086540	-0.279	ENSG00000164039|BDH2|chr4|-|RI|103085348|103086540|103085348|103085462|103085698|103086540_DN
ENSG00000162373|BEND5|chr1|-|SE|48742622|48742771|48736238|48736452|48758899|48759284	-0.277	ENSG00000162373|BEND5|chr1|-|SE|48742622|48742771|48736238|48736452|48758899|48759284_DN
ENSG00000114107|CEP70|chr3|-|A3SS|138572858|138572984|138572858|138572914|138591853|138591956	-0.277	ENSG00000114107|CEP70|chr3|-|A3SS|138572858|138572984|138572858|138572914|138591853|138591956_DN
ENSG00000139436|GIT2|chr12|-|SE|109945259|109945349|109939164|109939247|109947255|109947504	-0.277	ENSG00000139436|GIT2|chr12|-|SE|109945259|109945349|109939164|109939247|109947255|109947504_DN
ENSG00000120910|PPP3CC|chr8|+|SE|22539468|22539498|22532920|22533018|22540614|22541056	-0.277	ENSG00000120910|PPP3CC|chr8|+|SE|22539468|22539498|22532920|22533018|22540614|22541056_DN
ENSG00000000457|SCYL3|chr1|-|SE|169855795|169855957|169854269|169854964|169859040|169859212	-0.277	ENSG00000000457|SCYL3|chr1|-|SE|169855795|169855957|169854269|169854964|169859040|169859212_DN
ENSG00000139990|DCAF5|chr14|-|A3SS|69118138|69118278|69118138|69118275|69119193|69119230	-0.275	ENSG00000139990|DCAF5|chr14|-|A3SS|69118138|69118278|69118138|69118275|69119193|69119230_DN
ENSG00000179152|TCAIM|chr3|+|A3SS|44367455|44367708|44367531|44367708|44361364|44361518	-0.275	ENSG00000179152|TCAIM|chr3|+|A3SS|44367455|44367708|44367531|44367708|44361364|44361518_DN
ENSG00000073921|PICALM|chr11|-|SE|85990249|85990399|85983865|85983973|85996825|85996929	-0.274	ENSG00000073921|PICALM|chr11|-|SE|85990249|85990399|85983865|85983973|85996825|85996929_DN
ENSG00000005801|ZNF195|chr11|-|SE|3361742|3361889|3358993|3360565|3370974|3371070	-0.274	ENSG00000005801|ZNF195|chr11|-|SE|3361742|3361889|3358993|3360565|3370974|3371070_DN
ENSG00000122483|CCDC18|chr1|+|SE|93183977|93184146|93183359|93183495|93186344|93186398	-0.272	ENSG00000122483|CCDC18|chr1|+|SE|93183977|93184146|93183359|93183495|93186344|93186398_DN
ENSG00000175899|A2M|chr12|-|RI|9067711|9068224|9067711|9067839|9068182|9068224	-0.271	ENSG00000175899|A2M|chr12|-|RI|9067711|9068224|9067711|9067839|9068182|9068224_DN
ENSG00000204482|LST1|chr6|+|SE|31587943|31587966|31587640|31587733|31588562|31588626	-0.271	ENSG00000204482|LST1|chr6|+|SE|31587943|31587966|31587640|31587733|31588562|31588626_DN
ENSG00000140853|NLRC5|chr16|+|A3SS|57055432|57055519|57055435|57055519|57055031|57055094	-0.271	ENSG00000140853|NLRC5|chr16|+|A3SS|57055432|57055519|57055435|57055519|57055031|57055094_DN
ENSG00000152359|POC5|chr5|-|SE|75707736|75707875|75705238|75705787|75712853|75712951	-0.27	ENSG00000152359|POC5|chr5|-|SE|75707736|75707875|75705238|75705787|75712853|75712951_DN
ENSG00000168904|LRRC28|chr15|+|A3SS|99333922|99334129|99334017|99334129|99287813|99287951	-0.267	ENSG00000168904|LRRC28|chr15|+|A3SS|99333922|99334129|99334017|99334129|99287813|99287951_DN
ENSG00000087470|DNM1L|chr12|+|MXE|32737864|32737942|32738263|32738296|32737104|32737161|32740063|32740240	-0.266	ENSG00000087470|DNM1L|chr12|+|MXE|32737864|32737942|32738263|32738296|32737104|32737161|32740063|32740240_DN
ENSG00000164010|ERMAP|chr1|+|SE|42817533|42817815|42817121|42817253|42825622|42825735	-0.266	ENSG00000164010|ERMAP|chr1|+|SE|42817533|42817815|42817121|42817253|42825622|42825735_DN
ENSG00000223960|PRKRA-AS1|chr2|+|A5SS|178426365|178426703|178426365|178426505|178430769|178430889	-0.266	ENSG00000223960|PRKRA-AS1|chr2|+|A5SS|178426365|178426703|178426365|178426505|178430769|178430889_DN
ENSG00000105197|TIMM50|chr19|+|MXE|39482884|39482916|39485543|39485602|39481882|39482033|39485687|39485807	-0.265	ENSG00000105197|TIMM50|chr19|+|MXE|39482884|39482916|39485543|39485602|39481882|39482033|39485687|39485807_DN
ENSG00000185187|SIGIRR|chr11|-|SE|406842|406993|405871|406538|407061|407164	-0.264	ENSG00000185187|SIGIRR|chr11|-|SE|406842|406993|405871|406538|407061|407164_DN
ENSG00000105341|DMAC2|chr19|-|SE|41433271|41433434|41431318|41432408|41433536|41433673	-0.262	ENSG00000105341|DMAC2|chr19|-|SE|41433271|41433434|41431318|41432408|41433536|41433673_DN
ENSG00000128040|SPINK2|chr4|-|A5SS|56821457|56821742|56821607|56821742|56820535|56820579	-0.262	ENSG00000128040|SPINK2|chr4|-|A5SS|56821457|56821742|56821607|56821742|56820535|56820579_DN
ENSG00000163931|TKT|chr3|-|A3SS|53237796|53237921|53237796|53237820|53240250|53240348	-0.262	ENSG00000163931|TKT|chr3|-|A3SS|53237796|53237921|53237796|53237820|53240250|53240348_DN
ENSG00000204261|PSMB8-AS1|chr6|+|SE|32844644|32844870|32844132|32844274|32845417|32845986	-0.26	ENSG00000204261|PSMB8-AS1|chr6|+|SE|32844644|32844870|32844132|32844274|32845417|32845986_DN
ENSG00000136754|ABI1|chr10|-|SE|26771074|26771089|26770244|26770345|26777064|26777241	-0.259	ENSG00000136754|ABI1|chr10|-|SE|26771074|26771089|26770244|26770345|26777064|26777241_DN
ENSG00000130731|METTL26|chr16|-|A3SS|634888|635063|634888|634956|635280|635340	-0.258	ENSG00000130731|METTL26|chr16|-|A3SS|634888|635063|634888|634956|635280|635340_DN
ENSG00000160813|PPP1R35|chr7|-|RI|100435630|100436064|100435630|100435767|100435847|100436064	-0.258	ENSG00000160813|PPP1R35|chr7|-|RI|100435630|100436064|100435630|100435767|100435847|100436064_DN
ENSG00000205133|TRIQK|chr8|-|SE|92921502|92921660|92916928|92917010|92954405|92954564	-0.258	ENSG00000205133|TRIQK|chr8|-|SE|92921502|92921660|92916928|92917010|92954405|92954564_DN
ENSG00000123329|ARHGAP9|chr12|-|SE|57473602|57473691|57472265|57472688|57474041|57474176	-0.257	ENSG00000123329|ARHGAP9|chr12|-|SE|57473602|57473691|57472265|57472688|57474041|57474176_DN
ENSG00000198814|GK|chrX|+|SE|30727465|30727552|30724100|30724181|30728731|30729249	-0.257	ENSG00000198814|GK|chrX|+|SE|30727465|30727552|30724100|30724181|30728731|30729249_DN
[truncated: 1,280 more rows]

## Sheet: AML_BeatAML_S34F_DSE
Event_ID	Event_ID_withdir	delta_PSI
[truncated: 2,235 more rows]

## Sheet: MDS_Madan_R156-Q157_DSE
Event_ID	delta_PSI	Event_ID_withdir
[truncated: 1,934 more rows]

## Sheet: MDS_Pellagatti_R156-Q157_DSE
Event_ID	delta_PSI	Event_ID_withdir
[truncated: 1,389 more rows]

## Sheet: AML_BeatAML_Q157_DSE
Event_ID	delta_PSI	Event_ID_withdir
[truncated: 3,197 more rows]
