# Supplementary material for: U2af1S34F and U2af1Q157R myeloid neoplasm-associated hotspot mutations induce distinct hematopoietic phenotypes in mice
Source: Leukemia. 2026 May 6;40(7):1467–81. doi: 10.1038/s41375-026-02974-7 (PMC13276503; doi:10.1038/s41375-026-02974-7)
Supplement: Supplementary file 17 — Table S17 Gene ontology of KL-MDS-AML shared DSG [file 41375_2026_2974_MOESM17_ESM.xlsx]

## Sheet: Mouse-Human_S34F_DSG_GO
GO_BP	Description	GeneRatio	BgRatio	pvalue	p.adjust	qvalue	geneID	Count
GO:0016570	histone modification	17/135	474/18903	4.89417e-08	0.000101848	9.54621e-05	BCOR/ATF2/ATRX/HDAC7/MAP3K7/MED24/TRIP12/EHMT1/KDM5A/KDM6A/MORF4L2/MTA1/SUPT20H/TRERF1/WAC/PHF20L1/JMJD1C	17
GO:0000380	alternative mRNA splicing, via spliceosome	7/135	81/18903	1.81538e-06	0.00157118	0.00147267	FXR1/MBNL1/RBM25/FMR1/HNRNPM/PTBP1/RBM5	7
GO:1903311	regulation of mRNA metabolic process	12/135	309/18903	2.26504e-06	0.00157118	0.00147267	FXR1/MBNL1/RBM25/FMR1/HNRNPM/PABPC4/PTBP1/SLTM/CNOT2/RBM5/TNRC6A/SERBP1	12
GO:0000381	regulation of alternative mRNA splicing, via spliceosome	6/135	62/18903	5.25439e-06	0.00244927	0.00229571	FXR1/MBNL1/RBM25/FMR1/PTBP1/RBM5	6
GO:0043484	regulation of RNA splicing	9/135	180/18903	5.88484e-06	0.00244927	0.00229571	CCNL2/CLK3/FXR1/MBNL1/RBM25/FMR1/PTBP1/SUPT20H/RBM5	9
GO:0018205	peptidyl-lysine modification	12/135	414/18903	4.24707e-05	0.0147303	0.0138067	BCOR/ATF2/ATRX/HDAC7/MAP3K7/MED24/SMC6/EHMT1/KDM6A/MORF4L2/SUPT20H/PHF20L1	12
GO:0050684	regulation of mRNA processing	7/135	139/18903	6.32172e-05	0.0187936	0.0176153	FXR1/MBNL1/RBM25/FMR1/PTBP1/SLTM/RBM5	7
GO:0048024	regulation of mRNA splicing, via spliceosome	6/135	109/18903	0.000131601	0.032074	0.030063	FXR1/MBNL1/RBM25/FMR1/PTBP1/RBM5	6
GO:0008380	RNA splicing	12/135	469/18903	0.000138715	0.032074	0.030063	CCNL2/CLK3/DNAJC17/FXR1/MBNL1/RBM25/ZNF638/FMR1/HNRNPM/PTBP1/SUPT20H/RBM5	12
GO:0006417	regulation of translation	12/135	486/18903	0.00019287	0.0401363	0.0376198	TARBP2/EIF4G3/FXR1/LSM14A/POLDIP3/APP/DPH3/FMR1/XRN1/CNOT2/MKNK1/TNRC6A	12
GO:0043488	regulation of mRNA stability	7/135	175/18903	0.000264688	0.0500741	0.0469346	FXR1/FMR1/HNRNPM/PABPC4/CNOT2/TNRC6A/SERBP1	7
GO:0043487	regulation of RNA stability	7/135	187/18903	0.000395475	0.0646804	0.0606251	FXR1/FMR1/HNRNPM/PABPC4/CNOT2/TNRC6A/SERBP1	7
GO:0006402	mRNA catabolic process	8/135	248/18903	0.000414816	0.0646804	0.0606251	FXR1/FMR1/HNRNPM/PABPC4/XRN1/CNOT2/TNRC6A/SERBP1	8
GO:0061013	regulation of mRNA catabolic process	7/135	190/18903	0.00043514	0.0646804	0.0606251	FXR1/FMR1/HNRNPM/PABPC4/CNOT2/TNRC6A/SERBP1	7
GO_MF	Description	GeneRatio	BgRatio	pvalue	p.adjust	qvalue	geneID	Count
GO:0003727	single-stranded RNA binding	5/143	89/18432	0.00064482	0.0826388	0.0716994	FXR1/LSM14A/FMR1/PABPC4/PTBP1	5
GO:0031267	small GTPase binding	8/143	272/18432	0.00129763	0.0826388	0.0716994	GGA3/OPTN/USP33/DIAPH2/GIT2/MAPKAP1/AKAP13/PICALM	8
GO:0008187	poly-pyrimidine tract binding	3/143	28/18432	0.00129945	0.0826388	0.0716994	FMR1/PABPC4/PTBP1	3
GO:0046966	nuclear thyroid hormone receptor binding	3/143	29/18432	0.0014412	0.0826388	0.0716994	MED24/TRIP12/JMJD1C	3
GO:0032452	histone demethylase activity	3/143	30/18432	0.00159229	0.0826388	0.0716994	KDM5A/KDM6A/JMJD1C	3
GO:0140457	protein demethylase activity	3/143	30/18432	0.00159229	0.0826388	0.0716994	KDM5A/KDM6A/JMJD1C	3
GO:0071889	14-3-3 protein binding	3/143	31/18432	0.00175294	0.0826388	0.0716994	HDAC7/PPP1R12A/ARRB2	3
GO:0051020	GTPase binding	8/143	303/18432	0.00254705	0.0951635	0.0825661	GGA3/OPTN/USP33/DIAPH2/GIT2/MAPKAP1/AKAP13/PICALM	8
GO:0005078	MAP-kinase scaffold activity	2/143	11/18432	0.00313998	0.0951635	0.0825661	SPAG9/AKAP13	2
GO:0035064	methylated histone binding	4/143	80/18432	0.00348156	0.0951635	0.0825661	ATRX/FMR1/KDM5A/BPTF	4
GO:0140034	methylation-dependent protein binding	4/143	80/18432	0.00348156	0.0951635	0.0825661	ATRX/FMR1/KDM5A/BPTF	4
GO:0032451	demethylase activity	3/143	40/18432	0.00366194	0.0951635	0.0825661	KDM5A/KDM6A/JMJD1C	3
GO:0035197	siRNA binding	2/143	12/18432	0.00374887	0.0951635	0.0825661	TARBP2/FMR1	2
GO_CC	Description	GeneRatio	BgRatio	pvalue	p.adjust	qvalue	geneID	Count
GO:0036464	cytoplasmic ribonucleoprotein granule	10/140	248/19869	1.06219e-05	0.00280905	0.00240124	ATXN2L/FXR1/LSM14A/MBNL1/POLDIP3/FMR1/PABPC4/XRN1/CNOT2/TNRC6A	10
GO:0035770	ribonucleoprotein granule	10/140	265/19869	1.88527e-05	0.00280905	0.00240124	ATXN2L/FXR1/LSM14A/MBNL1/POLDIP3/FMR1/PABPC4/XRN1/CNOT2/TNRC6A	10
GO:0016607	nuclear speck	12/140	419/19869	4.23851e-05	0.00421026	0.00359902	ATXN2L/CCNL2/CLK3/MAPK9/POLDIP3/RBM25/SMC6/TRIP12/ZNF638/BCLAF1/FAM193B/WAC	12
GO:0031248	protein acetyltransferase complex	6/140	101/19869	8.04342e-05	0.00479388	0.00409791	ATF2/MAP3K7/MORF4L2/NAA16/SUPT20H/PHF20L1	6
GO:1902493	acetyltransferase complex	6/140	101/19869	8.04342e-05	0.00479388	0.00409791	ATF2/MAP3K7/MORF4L2/NAA16/SUPT20H/PHF20L1	6
GO:0010494	cytoplasmic stress granule	5/140	84/19869	0.000319357	0.0158614	0.0135587	ATXN2L/LSM14A/MBNL1/FMR1/PABPC4	5
GO:0000123	histone acetyltransferase complex	5/140	91/19869	0.000462512	0.0196898	0.0168313	ATF2/MAP3K7/MORF4L2/SUPT20H/PHF20L1	5
GO:0005905	clathrin-coated pit	4/140	71/19869	0.00159183	0.0592956	0.0506871	REPS1/APP/ARRB2/PICALM	4
GO:0000775	chromosome, centromeric region	7/140	250/19869	0.0019978	0.0661493	0.0565458	ITGB3BP/ATRX/PBRM1/PPP1R12A/SMC6/FMR1/CLIP1	7
GO:0000118	histone deacetylase complex	4/140	81/19869	0.00258206	0.0680598	0.058179	HDAC7/MTA1/TRERF1/JMJD1C	4
GO:0016592	mediator complex	3/140	40/19869	0.0027955	0.0680598	0.058179	MED24/BCLAF1/MED15	3
GO:1902562	H4 histone acetyltransferase complex	3/140	41/19869	0.00300077	0.0680598	0.058179	ATF2/MORF4L2/PHF20L1	3
GO:0000793	condensed chromosome	7/140	273/19869	0.00326217	0.0680598	0.058179	ITGB3BP/ATRX/PBRM1/PPP1R12A/SMC6/TOP3B/CLIP1	7
GO:0005819	spindle	9/140	426/19869	0.00326273	0.0680598	0.058179	TAF1D/LSM14A/SMC6/TFDP2/APP/CEP63/IRAG2/KIF23/ANAPC5	9
GO:0005741	mitochondrial outer membrane	6/140	207/19869	0.00351448	0.0680598	0.058179	CASP8/ATF2/MFF/OPA1/RHOT1/IMMT	6
GO:1990124	messenger ribonucleoprotein complex	2/140	13/19869	0.00365422	0.0680598	0.058179	LSM14A/FMR1	2
GO:0000153	cytoplasmic ubiquitin ligase complex	2/140	14/19869	0.00424363	0.0743883	0.0635887	OS9/USP33	2
GO:0000932	P-body	4/140	97/19869	0.00493234	0.0816576	0.0698027	LSM14A/XRN1/CNOT2/TNRC6A	4
GO:0031968	organelle outer membrane	6/140	235/19869	0.00647418	0.0973962	0.0832564	CASP8/ATF2/MFF/OPA1/RHOT1/IMMT	6
GO:0019867	outer membrane	6/140	237/19869	0.00673876	0.0973962	0.0832564	CASP8/ATF2/MFF/OPA1/RHOT1/IMMT	6
GO:1904724	tertiary granule lumen	3/140	55/19869	0.00687502	0.0973962	0.0832564	LTA4H/ARMC8/SPTAN1	3
GO:0030175	filopodium	4/140	108/19869	0.00719033	0.0973962	0.0832564	ABI1/FXR1/APP/FMR1	4
GO:0032433	filopodium tip	2/140	19/19869	0.00779275	0.0974544	0.0833062	ABI1/FMR1	2
GO:0000779	condensed chromosome, centromeric region	5/140	174/19869	0.00784868	0.0974544	0.0833062	ITGB3BP/ATRX/PBRM1/PPP1R12A/CLIP1	5

## Sheet: Mouse-Human_Q157R_DSG_GO
GO_BP	Description	GeneRatio	BgRatio	pvalue	p.adjust	qvalue	geneID	Count
GO:0061085	regulation of histone H3-K27 methylation	3/90	10/18903	1.22255e-05	0.0189739	0.017965	MTF2/PHF19/OGT	3
GO:0070734	histone H3-K27 methylation	3/90	18/18903	8.08691e-05	0.0366955	0.0347442	MTF2/PHF19/OGT	3
GO:1902903	regulation of supramolecular fiber organization	9/90	384/18903	8.88745e-05	0.0366955	0.0347442	AKAP9/ARHGEF7/CLIP1/FHOD1/NF2/SPTAN1/DYRK1A/PRKCD/ARFIP1	9
GO:2001020	regulation of response to DNA damage stimulus	8/90	312/18903	0.000120734	0.0366955	0.0347442	ING4/NFRKB/PBRM1/DYRK1A/PRKCD/DDX11/MMS19/TRIP12	8
GO:0031113	regulation of microtubule polymerization	4/90	54/18903	0.000126678	0.0366955	0.0347442	AKAP9/ARHGEF7/CLIP1/DYRK1A	4
GO:2001022	positive regulation of response to DNA damage stimulus	6/90	166/18903	0.000141864	0.0366955	0.0347442	ING4/NFRKB/PBRM1/PRKCD/DDX11/MMS19	6
GO:0031056	regulation of histone modification	6/90	175/18903	0.0001891	0.0419261	0.0396967	MTF2/PHF19/SETD5/BCOR/OGT/TRIP12	6
GO:0034968	histone lysine methylation	5/90	130/18903	0.000392127	0.0647172	0.0612759	MTF2/PHF19/SETD5/BCOR/OGT	5
GO:0032271	regulation of protein polymerization	6/90	201/18903	0.000397888	0.0647172	0.0612759	AKAP9/ARHGEF7/CLIP1/SPTAN1/DYRK1A/PRKCD	6
GO:0033522	histone H2A ubiquitination	3/90	32/18903	0.000468418	0.0647172	0.0612759	DDB2/BCOR/TRIP12	3
GO:0006302	double-strand break repair	7/90	300/18903	0.000573839	0.0647172	0.0612759	DCLRE1C/PBRM1/PAXX/DDX11/IFFO1/MMS19/TRIP12	7
GO:0051054	positive regulation of DNA metabolic process	7/90	301/18903	0.000585258	0.0647172	0.0612759	CIZ1/NFRKB/PBRM1/PRKCD/DDX11/BAZ1A/MMS19	7
GO:0031060	regulation of histone methylation	4/90	81/18903	0.000604359	0.0647172	0.0612759	MTF2/PHF19/BCOR/OGT	4
GO:0032272	negative regulation of protein polymerization	4/90	81/18903	0.000604359	0.0647172	0.0612759	ARHGEF7/SPTAN1/DYRK1A/PRKCD	4
GO:0018022	peptidyl-lysine methylation	5/90	144/18903	0.000625489	0.0647172	0.0612759	MTF2/PHF19/SETD5/BCOR/OGT	5
GO:0046785	microtubule polymerization	4/90	85/18903	0.000724953	0.0703204	0.0665812	AKAP9/ARHGEF7/CLIP1/DYRK1A	4
GO:0031110	regulation of microtubule polymerization or depolymerization	4/90	87/18903	0.00079122	0.0722337	0.0683928	AKAP9/ARHGEF7/CLIP1/DYRK1A	4
GO:0006646	phosphatidylethanolamine biosynthetic process	2/90	10/18903	0.000984054	0.0803817	0.0761075	PCYT2/CHKB	2
GO:0032070	regulation of deoxyribonuclease activity	2/90	10/18903	0.000984054	0.0803817	0.0761075	PRKCD/DDX11	2
GO:0016571	histone methylation	5/90	167/18903	0.0012165	0.0944001	0.0893804	MTF2/PHF19/SETD5/BCOR/OGT	5
GO_MF	Description	GeneRatio	BgRatio	pvalue	p.adjust	qvalue	geneID	Count
GO:0035064	methylated histone binding	5/90	80/18432	4.46994e-05	0.00516278	0.0046111	ING4/CHD8/MTF2/PHF19/SETD5	5
GO:0140034	methylation-dependent protein binding	5/90	80/18432	4.46994e-05	0.00516278	0.0046111	ING4/CHD8/MTF2/PHF19/SETD5	5
GO:0140030	modification-dependent protein binding	6/90	172/18432	0.000197091	0.0138334	0.0123552	ING4/CHD8/MTF2/PHF19/SETD5/BRD9	6
GO:0008266	poly(U) RNA binding	3/90	25/18432	0.000239539	0.0138334	0.0123552	PABPC4/HNRNPH1/RBMS1	3
GO:0008187	poly-pyrimidine tract binding	3/90	28/18432	0.000337593	0.0155968	0.0139301	PABPC4/HNRNPH1/RBMS1	3
GO:0003727	single-stranded RNA binding	4/90	89/18432	0.000945708	0.0364098	0.0325191	PABPC4/HNRNPH1/RBMS1/DDX11	4
GO:0004715	non-membrane spanning protein tyrosine kinase activity	3/90	45/18432	0.00137726	0.0406907	0.0363426	FYN/DYRK1A/PRKCD	3
GO:0004842	ubiquitin-protein transferase activity	8/90	441/18432	0.0014092	0.0406907	0.0363426	DDB2/BCOR/RNF216/TTC3/FBXW2/MIB2/BIRC6/TRIP12	8
GO:0042393	histone binding	6/90	258/18432	0.00165633	0.0425124	0.0379696	ING4/CHD8/MTF2/PHF19/SETD5/BRD9	6
GO:0019787	ubiquitin-like protein transferase activity	8/90	465/18432	0.00196523	0.0433699	0.0387355	DDB2/BCOR/RNF216/TTC3/FBXW2/MIB2/BIRC6/TRIP12	8
GO:0016004	phospholipase activator activity	2/90	14/18432	0.00206524	0.0433699	0.0387355	STX4/FYN	2
GO:0060229	lipase activator activity	2/90	17/18432	0.00305726	0.0588523	0.0525634	STX4/FYN	2
GO:0050321	tau-protein kinase activity	2/90	22/18432	0.00511122	0.0908225	0.0811174	FYN/DYRK1A	2
GO_CC	Description	GeneRatio	BgRatio	pvalue	p.adjust	qvalue	geneID	Count
GO:0070603	SWI/SNF superfamily-type complex	5/93	90/19869	6.47258e-05	0.0107939	0.0096011	NFRKB/PBRM1/BRD9/BAZ1A/HMGXB4	5
GO:1904949	ATPase complex	5/93	94/19869	7.96598e-05	0.0107939	0.0096011	NFRKB/PBRM1/BRD9/BAZ1A/HMGXB4	5
GO:0000776	kinetochore	5/93	164/19869	0.00104369	0.0643743	0.0572605	CENPU/CLIP1/ZNF276/PBRM1/PPP1R12A	5
GO:0000775	chromosome, centromeric region	6/93	250/19869	0.00114323	0.0643743	0.0572605	CENPU/CLIP1/ZNF276/PBRM1/BAZ1A/PPP1R12A	6
GO:0000779	condensed chromosome, centromeric region	5/93	174/19869	0.0013576	0.0643743	0.0572605	CENPU/CLIP1/ZNF276/PBRM1/PPP1R12A	5
GO:0031010	ISWI-type complex	2/93	13/19869	0.00163475	0.0643743	0.0572605	BAZ1A/HMGXB4	2
GO:0034451	centriolar satellite	4/93	108/19869	0.00166281	0.0643743	0.0572605	CENPU/RBM39/EXOC7/PCM1	4
