# Supplementary material for: U2af1S34F and U2af1Q157R myeloid neoplasm-associated hotspot mutations induce distinct hematopoietic phenotypes in mice
Source: Leukemia. 2026 May 6;40(7):1467–81. doi: 10.1038/s41375-026-02974-7 (PMC13276503; doi:10.1038/s41375-026-02974-7)
Supplement: Supplementary file 18 — Table S18 List of U2AF1 mutated patients identified in 21 studies [file 41375_2026_2974_MOESM18_ESM.xlsx]

## Sheet: Patients with U2AF1 mutations
Study ID	Study PMID	Unique Patient ID	Gene Symbol	Amino Acid Change	Diagnosis	Subtype
1	23443460	100901	U2AF1	Q157P	MDS
1	23443460	137250	U2AF1	S34Y	MDS
1	23443460	178647	U2AF1	S34F	sAML
1	23443460	321864	U2AF1	S34F	MDS
1	23443460	463763	U2AF1	S34F	MDS
1	23443460	530724	U2AF1	Q157P	MDS
1	23443460	571656	U2AF1	S34F	MDS
1	23443460	843623	U2AF1	S34F	MDS
1	23443460	917011	U2AF1	S34F	MDS
1	23443460	937954	U2AF1	S34Y	MDS
1	23443460	947519	U2AF1	Q157R	MDS
1	23443460	947519	U2AF1	S34F	MDS
1	23443460	989739	U2AF1	S34F	MDS
1	23443460	02-86	U2AF1	S34F	MDS
1	23443460	266395_MDS	U2AF1	S34F	MDS
1	23443460	300813_MDS	U2AF1	S34F	MDS
1	23443460	855934_MDS	U2AF1	Q157P	MDS
2	23634996	245450	U2AF1	S34F	AML	M4
2	23634996	246634	U2AF1	S34F	AML	M4
2	23634996	274429	U2AF1	Q157P	AML	M1
2	23634996	400830	U2AF1	S34Y	AML	M2
2	23634996	445045	U2AF1	S34F	AML	M2
2	23634996	569053	U2AF1	S34F	AML	M6
2	23634996	633734	U2AF1	S34F	AML	M1
2	23634996	957664	U2AF1	S34Y	AML	M5
3	24030381	PD5726a	U2AF1	Q157R	MDS	RCMD
3	24030381	PD5728a	U2AF1	S34F	MDS	RCMD
3	24030381	PD5732a	U2AF1	Q157P	MDS	RCMD
3	24030381	PD5737a	U2AF1	S34F	MDS	RCMD
3	24030381	PD5756a	U2AF1	Q157P	MDS	RAEB
3	24030381	PD6053a	U2AF1	S34F	MDS	RAEB
3	24030381	PD6088a	U2AF1	Q157P	MDS	RAEB
3	24030381	PD6093a	U2AF1	Q157P	MDS	RCMD
3	24030381	PD6147a	U2AF1	S34F	MDS	RAEB
3	24030381	PD6160a	U2AF1	Q157R	MDS	RAEB
3	24030381	PD6173a	U2AF1	Q157R	MDS	RA
3	24030381	PD6188a	U2AF1	Q157P	MDS	RAEB
3	24030381	PD6191a	U2AF1	Q157P	MDS	RAEB
3	24030381	PD6195a	U2AF1	S34F	MDS	RCMD
3	24030381	PD6240a	U2AF1	Q157P	MDS	RARS
3	24030381	PD6241a	U2AF1	Q157P	MDS	RAEB
3	24030381	PD6242a	U2AF1	S34F	MDS	RAEB
3	24030381	PD6246a	U2AF1	Q157P	MDS	5q-
3	24030381	PD6251a	U2AF1	Q157P	MDS	RAEB
3	24030381	PD6263a	U2AF1	S34F	MDS	RA
3	24030381	PD6266a	U2AF1	S34F	MDS	RAEB
3	24030381	PD6283a	U2AF1	Q157R	CMML
3	24030381	PD6474a	U2AF1	Q157R	CMML
3	24030381	PD6484a	U2AF1	Q157P	MDS	RAEB
3	24030381	PD6485a	U2AF1	S34F	MDS	RA
3	24030381	PD6496a	U2AF1	S34F	MDS	RA
3	24030381	PD6502a	U2AF1	Q157P	MDS	RA
3	24030381	PD6506a	U2AF1	Q157P	MDS	RA
3	24030381	PD6515a	U2AF1	Q157P	MDS	RA
3	24030381	PD6534a	U2AF1	Q157P	MDS	RCMD
3	24030381	PD6539a	U2AF1	Q157P	MDS	RCMD
3	24030381	PD6780a	U2AF1	Q157R	MDS	RCMD-RS
3	24030381	PD6853a	U2AF1	Q157P	sAML
3	24030381	PD6903a	U2AF1	S34F	MDS	RCMD
3	24030381	PD6909a	U2AF1	Q157P	MDS	RCMD
3	24030381	PD6926a	U2AF1	S34F	MDS	RCMD
3	24030381	PD6941a	U2AF1	D233E	MDS	RCMD
3	24030381	PD6950a	U2AF1	Q157P	sAML
3	24030381	PD6953a	U2AF1	Q157P	CMML
3	24030381	PD6969a	U2AF1	S34Y	MDS	RAEB
3	24030381	PD6986a	U2AF1	R156H	MDS	RAEB
3	24030381	PD6988a	U2AF1	Q157P	MDS	RAEB
3	24030381	PD7117a	U2AF1	S34F	MDS	RCMD
3	24030381	PD7372a	U2AF1	R156H	MDS	RAEB
3	24030381	PD7385a	U2AF1	Q157R	MDS	RAEB
3	24030381	PD7385a	U2AF1	S34F	MDS	RAEB
4	38319256	E-H-100017-T1-1-D1-1	U2AF1	S34F	MDS	MDS-EB2
4	38319256	E-H-100045-T1-1-D1-1	U2AF1	Q157P	MDS	MDS-MLD
4	38319256	E-H-100062-T1-1-D1-1	U2AF1	E159_M160insYE	MDS	MDS-RS-MLD
4	38319256	E-H-100104-T1-1-D1-1	U2AF1	S34F	MDS	MDS-EB2
4	38319256	E-H-100125-T1-1-D1-1	U2AF1	S34F	MDS	MDS-EB2
4	38319256	E-H-100129-T1-1-D1-1	U2AF1	Q157P	MDS	MDS-SLD
4	38319256	E-H-100131-T1-1-D1-1	U2AF1	Q157P	MDS	MDS-EB1
4	38319256	E-H-100143-T1-1-D1-1	U2AF1	Q157P	MDS	MDS-MLD
4	38319256	E-H-100162-T1-1-D1-1	U2AF1	Q157P	MDS	MDS-EB1
4	38319256	E-H-100167-T1-1-D1-1	U2AF1	Q157P	MDS	MDS-MLD
4	38319256	E-H-100189-T1-1-D1-1	U2AF1	M172L	MDS	MDS-MLD
4	38319256	E-H-100233-T1-1-D1-1	U2AF1	Q157P	MDS	MDS-MLD
4	38319256	E-H-100241-T1-1-D1-1	U2AF1	Q157P	MDS	MDS-EB2
4	38319256	E-H-100245-T1-1-D1-1	U2AF1	S34F	MDS	MDS-EB1
4	38319256	E-H-100261-T1-1-D1-1	U2AF1	Q157R	MDS	MDS-EB1
4	38319256	E-H-100266-T1-1-D1-1	U2AF1	Q157R	MDS	MDS-EB2
4	38319256	E-H-100276-T1-1-D1-1	U2AF1	Q157P	MDS	MDS-RS-MLD
4	38319256	E-H-100283-T1-1-D1-1	U2AF1	Q157P	MDS	MDS-EB1
4	38319256	E-H-100324-T1-1-D1-1	U2AF1	S34F	MDS	MDS-MLD
4	38319256	E-H-100384-T1-1-D1-1	U2AF1	Q157R	MDS	MDS-SLD
4	38319256	E-H-100409-T1-1-D1-1	U2AF1	Q157P	MDS	MDS-EB2
4	38319256	E-H-100414-T1-1-D1-1	U2AF1	Q157R	MDS	MDS-SLD
4	38319256	E-H-100434-T1-1-D1-1	U2AF1	Q157P	MDS	MDS-EB1
4	38319256	E-H-102591-T1-1-D1-1	U2AF1	S34F	MDS	MDS-EB2
4	38319256	E-H-102596-T1-1-D1-1	U2AF1	S34Y	MDS	MDS-RS-SLD
4	38319256	E-H-102598-T1-1-D1-1	U2AF1	S34F	MDS	MDS-MLD
4	38319256	E-H-102598-T1-1-D1-1	U2AF1	Q157R	MDS	MDS-MLD
4	38319256	E-H-102600-T1-1-D1-1	U2AF1	Q157P	MDS	MDS-RS-MLD
4	38319256	E-H-102676-T1-1-D1-1	U2AF1	S34F	MDS	MDS-EB1
4	38319256	E-H-102684-T1-1-D1-1	U2AF1	Q157P	MDS	MDS-EB1
4	38319256	E-H-102821-T1-1-D1-1	U2AF1	Q157R	MDS	MDS-SLD
4	38319256	E-H-102856-T1-1-D1-1	U2AF1	Q157P	MDS	MDS-RS-SLD
4	38319256	E-H-102857-T1-1-D1-1	U2AF1	Q157P	MDS	MDS-SLD
4	38319256	E-H-102927-T1-1-D1-1	U2AF1	Q157P	MDS	MDS-EB1
4	38319256	E-H-102940-T1-1-D1-1	U2AF1	Q157P	MDS	MDS-MLD
4	38319256	E-H-102995-T1-1-D1-1	U2AF1	S34F	MDS	MDS-EB1
4	38319256	E-H-103047-T1-1-D1-1	U2AF1	S34F	MDS	MDS-MLD
4	38319256	E-H-103076-T1-1-D1-1	U2AF1	Q157P	MDS	MDS-MLD
4	38319256	E-H-105443-T1-1-D1-1	U2AF1	S34F	MDS	MDS-MLD
4	38319256	E-H-105448-T1-1-D1-1	U2AF1	S34F	MDS	MDS-RS-MLD
4	38319256	E-H-105449-T1-1-D1-1	U2AF1	Q157P	MDS	MDS-EB1
4	38319256	E-H-105451-T1-1-D1-1	U2AF1	Q157P	MDS	MDS-EB1
4	38319256	E-H-105493-T1-1-D1-1	U2AF1	Q157P	MDS	MDS-EB1
4	38319256	E-H-105516-T1-1-D1-1	U2AF1	S34F	MDS	MDS-U
4	38319256	E-H-105556-T1-1-D1-1	U2AF1	Q157R	MDS	MDS-EB1
4	38319256	E-H-105575-T1-1-D1-1	U2AF1	S34F	MDS	MDS-RS-MLD
4	38319256	E-H-105578-T1-1-D1-1	U2AF1	S34F	MDS	MDS-MLD
4	38319256	E-H-105596-T1-1-D1-1	U2AF1	S34F	MDS	MDS-MLD
4	38319256	E-H-105612-T1-1-D1-1	U2AF1	S34F	MDS	MDS-MLD
4	38319256	E-H-105627-T1-1-D1-1	U2AF1	S34F	MDS	MDS-MLD
4	38319256	E-H-105635-T1-1-D1-1	U2AF1	R156H	MDS	MDS-MLD
4	38319256	E-H-105640-T1-1-D1-1	U2AF1	S34F	MDS	MDS-MLD
4	38319256	E-H-105641-T1-1-D1-1	U2AF1	S34F	MDS	MDS-EB2
4	38319256	E-H-105646-T1-1-D1-1	U2AF1	Q157R	MDS	MDS-MLD
4	38319256	E-H-105671-T1-1-D1-1	U2AF1	S34F	MDS	MDS-RS-MLD
4	38319256	E-H-105698-T1-1-D1-1	U2AF1	S34F	MDS	MDS-MLD
4	38319256	E-H-105702-T1-1-D1-1	U2AF1	R156H	MDS	MDS-EB1
4	38319256	E-H-105705-T1-1-D1-1	U2AF1	Q157P	MDS	MDS-EB1
4	38319256	E-H-105715-T1-1-D1-1	U2AF1	Q157P	MDS	MDS-MLD
4	38319256	E-H-105734-T1-1-D1-1	U2AF1	Q157P	MDS	MDS-MLD
4	38319256	E-H-105754-T1-1-D1-1	U2AF1	S34F	MDS	MDS-MLD
4	38319256	E-H-105755-T1-1-D1-1	U2AF1	S34F	MDS	MDS-MLD
4	38319256	E-H-105769-T1-1-D1-1	U2AF1	S34F	MDS	MDS-MLD
4	38319256	E-H-105803-T1-1-D1-1	U2AF1	S34F	MDS	MDS-U
4	38319256	E-H-105807-T1-1-D1-1	U2AF1	Q157P	MDS	MDS-del5q
4	38319256	E-H-105817-T1-1-D1-1	U2AF1	Q157R	MDS	MDS-U
4	38319256	E-H-105822-T1-1-D1-1	U2AF1	Q157P	MDS	MDS-RS-MLD
4	38319256	E-H-105855-T1-1-D1-1	U2AF1	Q157P	MDS	MDS-EB2
4	38319256	E-H-105865-T1-1-D1-1	U2AF1	Q157R	MDS	MDS-MLD
4	38319256	E-H-105873-T1-1-D1-1	U2AF1	Q157P	MDS	MDS-MLD
4	38319256	E-H-105904-T1-1-D1-1	U2AF1	Q157R	MDS	MDS-U
4	38319256	E-H-105921-T1-1-D1-1	U2AF1	Q157P	MDS	MDS-MLD
4	38319256	E-H-105922-T1-1-D1-1	U2AF1	Q157P	MDS	MDS-EB1
4	38319256	E-H-105948-T1-1-D1-1	U2AF1	Q157R	MDS	MDS-MLD
4	38319256	E-H-105970-T1-1-D1-1	U2AF1	Q157R	CMML
4	38319256	E-H-105983-T1-1-D1-1	U2AF1	E159_M160insYE	MDS	MDS-RS-SLD
4	38319256	E-H-105986-T1-1-D1-1	U2AF1	Q157P	MDS	MDS-RS-MLD
4	38319256	E-H-106015-T1-1-D1-1	U2AF1	S34Y	MDS	MDS-SLD
4	38319256	E-H-106017-T1-1-D1-1	U2AF1	S34F	MDS	MDS-SLD
4	38319256	E-H-106024-T1-1-D1-1	U2AF1	Q157R	MDS	MDS-MLD
4	38319256	E-H-106036-T1-1-D1-1	U2AF1	S34F	MDS	MDS-EB1
4	38319256	E-H-106061-T1-1-D1-1	U2AF1	Q157P	MDS	MDS-SLD
4	38319256	E-H-106079-T1-1-D1-1	U2AF1	S34F	MDS	MDS-RS-MLD
4	38319256	E-H-106235-T1-1-D1-1	U2AF1	S34F	MDS	MDS-EB2
4	38319256	E-H-106246-T1-1-D1-1	U2AF1	Q157R	MDS	MDS-EB1
4	38319256	E-H-110407-T1-1-D1-1	U2AF1	Q157R	MDS	MDS-MLD
4	38319256	E-H-110408-T1-1-D1-1	U2AF1	S34Y	MDS	MDS-EB1
4	38319256	E-H-110436-T1-1-D1-1	U2AF1	S34F	MDS	MDS-MLD
4	38319256	E-H-110461-T1-1-D1-1	U2AF1	Q157R	MDS	MDS-EB1
4	38319256	E-H-110464-T1-1-D1-1	U2AF1	S34Y	MDS	MDS-MLD
4	38319256	E-H-110609-T1-1-D1-1	U2AF1	Q157P	MDS	MDS-MLD
4	38319256	E-H-110692-T1-1-D1-1	U2AF1	E159_M160insYE	MDS	MDS-MLD
4	38319256	E-H-110717-T1-1-D1-1	U2AF1	S34F	MDS	MDS-EB2
4	38319256	E-H-110719-T1-1-D1-1	U2AF1	S34F	CMML
4	38319256	E-H-110753-T1-1-D1-1	U2AF1	S34F	MDS	MDS-EB1
4	38319256	E-H-110754-T1-1-D1-1	U2AF1	Q157P	MDS	MDS-MLD
4	38319256	E-H-110759-T1-1-D1-1	U2AF1	S34Y	CMML
4	38319256	E-H-110764-T1-1-D1-1	U2AF1	S34F	MDS	MDS-MLD
4	38319256	E-H-110766-T1-1-D1-1	U2AF1	Q157R	MDS	MDS-EB1
4	38319256	E-H-110783-T1-1-D1-1	U2AF1	S34F	MDS	MDS-EB2
4	38319256	E-H-110808-T1-1-D1-1	U2AF1	S34F	MDS	MDS-EB1
4	38319256	E-H-110820-T1-1-D1-1	U2AF1	S34F	MDS	MDS-MLD
4	38319256	E-H-110830-T1-1-D1-1	U2AF1	S34F	MDS	MDS-RS-MLD
4	38319256	E-H-110849-T1-1-D1-1	U2AF1	Q157H	MDS	MDS-RS-SLD
4	38319256	E-H-110863-T1-1-D1-1	U2AF1	E159_M160insNE	MDS	MDS-MLD
4	38319256	E-H-110884-T1-1-D1-1	U2AF1	Q157R	MDS	MDS-SLD
4	38319256	E-H-110900-T1-1-D1-1	U2AF1	Q157R	MDS	MDS-MLD
4	38319256	E-H-110910-T1-1-D1-1	U2AF1	Q157R	MDS	MDS-MLD
4	38319256	E-H-110917-T1-1-D1-1	U2AF1	S34F	MDS	MDS-EB2
4	38319256	E-H-110922-T1-1-D1-1	U2AF1	Q157R	MDS	MDS-EB1
4	38319256	E-H-116334-T1-1-D1-1	U2AF1	E159_M160insYE	MDS	MDS-EB1
4	38319256	E-H-116397-T1-1-D1-1	U2AF1	S34F	CMML
4	38319256	E-H-116407-T1-1-D1-1	U2AF1	Q157P	MDS	MDS-EB2
4	38319256	E-H-116427-T1-1-D1-1	U2AF1	Q157P	MDS	MDS-MLD
4	38319256	E-H-116428-T1-1-D1-1	U2AF1	Q157P	MDS	MDS-RS-MLD
4	38319256	E-H-116451-T1-1-D1-1	U2AF1	S34F	MDS	MDS-MLD
4	38319256	E-H-116555-T1-1-D1-1	U2AF1	E159_M160insYE	MDS	MDS-MLD
4	38319256	E-H-116644-T1-1-D1-1	U2AF1	Q157P	MDS	MDS-SLD
4	38319256	E-H-116652-T1-1-D1-1	U2AF1	E159G	MDS	MDS-EB1
4	38319256	E-H-116663-T1-1-D1-1	U2AF1	Q157P	MDS	MDS-EB1
4	38319256	E-H-116687-T1-1-D1-1	U2AF1	Q157P	MDS	MDS-MLD
4	38319256	E-H-116727-T1-1-D1-1	U2AF1	S34F	MDS	MDS-SLD
4	38319256	E-H-116752-T1-1-D1-1	U2AF1	Q157P	MDS	MDS-EB1
4	38319256	E-H-116753-T1-1-D1-1	U2AF1	S34F	MDS	MDS-EB2
4	38319256	E-H-116761-T1-1-D1-1	U2AF1	S34F	MDS	MDS-EB2
4	38319256	E-H-116761-T1-1-D1-1	U2AF1	Q157R	MDS	MDS-EB2
4	38319256	E-H-116776-T1-1-D1-1	U2AF1	Q157P	MDS	MDS-EB1
4	38319256	E-H-116782-T1-1-D1-1	U2AF1	S34Y	MDS	MDS-EB2
4	38319256	E-H-116790-T1-1-D1-1	U2AF1	Q157P	MDS	MDS-EB1
4	38319256	E-H-117017-T1-1-D1-1	U2AF1	S34F	MDS	MDS-MLD
4	38319256	E-H-117147-T1-1-D1-1	U2AF1	Q157R	MDS	MDS-EB1
4	38319256	E-H-117160-T1-1-D1-1	U2AF1	Q157P	MDS	MDS-EB1
4	38319256	E-H-117161-T1-1-D1-1	U2AF1	Q157P	MDS	MDS-EB1
4	38319256	E-H-117183-T1-1-D1-1	U2AF1	Q157P	MDS	MDS-EB1
4	38319256	E-H-117188-T1-1-D1-1	U2AF1	S34Y	MDS	MDS-MLD
4	38319256	E-H-117204-T1-1-D1-1	U2AF1	Q157P	MDS	MDS-EB2
4	38319256	E-H-117400-T1-1-D1-1	U2AF1	Q157P	MDS	MDS-MLD
4	38319256	E-H-117404-T1-1-D1-1	U2AF1	Q157P	MDS	MDS-EB2
4	38319256	E-H-117415-T1-1-D1-1	U2AF1	S34F	MDS	MDS-EB1
4	38319256	E-H-117440-T1-1-D1-1	U2AF1	Q157P	MDS	MDS-EB1
4	38319256	E-H-117444-T1-1-D1-1	U2AF1	Q157P	MDS	MDS-MLD
4	38319256	E-H-117448-T1-1-D1-1	U2AF1	S34F	MDS	MDS-EB2
4	38319256	E-H-117456-T1-1-D1-1	U2AF1	S34F	MDS	MDS-RS-MLD
4	38319256	E-H-117477-T1-1-D1-1	U2AF1	S34F	MDS	MDS-MLD
4	38319256	E-H-118017-T1-1-D1-1	U2AF1	Q157R	CMML
4	38319256	E-H-118025-T1-1-D1-1	U2AF1	E159_M160insYE	CMML
4	38319256	E-H-118036-T1-1-D1-1	U2AF1	Q157P	MDS	MDS-MLD
4	38319256	E-H-118053-T1-1-D1-1	U2AF1	R156H	MDS	MDS-EB1
4	38319256	E-H-118182-T1-1-D1-1	U2AF1	Q157P	MDS	MDS-SLD/MLD
4	38319256	E-H-118189-T1-1-D1-1	U2AF1	Q157P	MDS	MDS-EB1
4	38319256	E-H-118203-T1-1-D1-1	U2AF1	Q157P	MDS	MDS-EB2
4	38319256	E-H-118220-T1-1-D1-1	U2AF1	S34Y	MDS	MDS-EB1
4	38319256	E-H-118232-T1-1-D1-1	U2AF1	S34F	MDS	MDS-EB2
4	38319256	E-H-118243-T1-1-D1-1	U2AF1	S34F	MDS	MDS-EB2
4	38319256	E-H-118250-T1-1-D1-1	U2AF1	S34F	MDS	MDS-SLD
4	38319256	E-H-118259-T1-1-D1-1	U2AF1	R35L	MDS	MDS-del5q
4	38319256	E-H-118398-T1-1-D1-1	U2AF1	S34F	MDS	MDS-MLD
4	38319256	E-H-118432-T1-1-D1-1	U2AF1	Q157P	MDS	MDS-EB1
4	38319256	E-H-118433-T1-1-D1-1	U2AF1	Q157P	MDS	MDS-EB1
4	38319256	E-H-118450-T1-1-D1-1	U2AF1	E201D	CMML
4	38319256	E-H-118465-T1-1-D1-1	U2AF1	Q157P	MDS	MDS-EB2
4	38319256	E-H-118485-T1-1-D1-1	U2AF1	S34F	MDS	MDS-EB2
4	38319256	E-H-118499-T1-1-D1-1	U2AF1	Q157P	CMML
4	38319256	E-H-118505-T1-1-D1-1	U2AF1	S34F	MDS	MDS-MLD
4	38319256	E-H-118506-T1-1-D1-1	U2AF1	S34Y	MDS	MDS-SLD
4	38319256	E-H-118508-T1-1-D1-1	U2AF1	Q157P	MDS	MDS-MLD
4	38319256	E-H-118512-T1-1-D1-1	U2AF1	Q157P	MDS	MDS-U
4	38319256	E-H-118780-T1-1-D1-1	U2AF1	Q157R	MDS	MDS-EB1
4	38319256	E-H-120354-T1-1-D1-1	U2AF1	Q157P	MDS	MDS-RS-MLD
4	38319256	E-H-120798-T1-1-D1-1	U2AF1	S34F	MDS	MDS-MLD
4	38319256	E-H-120812-T1-1-D1-1	U2AF1	S34F	MDS	MDS-MLD
4	38319256	E-H-120829-T1-1-D1-3	U2AF1	Q157R	MDS	MDS-RS-SLD
4	38319256	E-H-120836-T1-1-D1-3	U2AF1	S34F	MDS	MDS-EB1
4	38319256	E-H-120842-T1-1-D1-3	U2AF1	Q157R	MDS	MDS-EB2
4	38319256	E-H-120856-T1-1-D1-1	U2AF1	Q157P	MDS	MDS-MLD
4	38319256	E-H-120857-T1-1-D1-1	U2AF1	S34F	MDS	MDS-EB1
4	38319256	E-H-120874-T1-1-D1-3	U2AF1	S34Y	MDS	MDS-RS-MLD
4	38319256	E-H-120914-T1-1-D1-1	U2AF1	Q157P	MDS	MDS-U
4	38319256	E-H-120950-T1-1-D1-1	U2AF1	S34Y	MDS	MDS-MLD
4	38319256	E-H-120954-T1-1-D1-1	U2AF1	S34Y	MDS	MDS-RS-MLD
4	38319256	E-H-120955-T1-1-D1-3	U2AF1	Q157P	MDS	MDS-MLD
4	38319256	E-H-120972-T1-1-D1-1	U2AF1	Q157P	MDS	MDS-MLD
4	38319256	E-H-120993-T1-1-D1-1	U2AF1	S34F	MDS	MDS-MLD
4	38319256	E-H-121001-T1-1-D1-1	U2AF1	S34F	MDS	MDS-MLD
4	38319256	E-H-121007-T1-1-D1-3	U2AF1	S34F	MDS	MDS-EB1
4	38319256	E-H-121055-T1-1-D1-3	U2AF1	S34Y	MDS	MDS-MLD
4	38319256	E-H-121064-T1-1-D1-1	U2AF1	Q157P	MDS	MDS-MLD
4	38319256	E-H-121066-T1-1-D1-3	U2AF1	S34F	MDS	MDS-MLD
4	38319256	E-H-121101-T1-1-D1-1	U2AF1	S34F	MDS	MDS-EB2
4	38319256	E-H-121116-T1-1-D1-1	U2AF1	Q157P	MDS	MDS-MLD
4	38319256	E-H-121120-T1-1-D1-1	U2AF1	S34F	MDS	MDS-MLD
4	38319256	E-H-121133-T1-1-D1-3	U2AF1	S34F	MDS	MDS-U
4	38319256	E-H-121141-T1-1-D1-3	U2AF1	Q157R	MDS	MDS-MLD
4	38319256	E-H-121149-T1-1-D1-1	U2AF1	S34F	MDS	MDS-SLD/MLD
4	38319256	E-H-121800-T1-1-D1-1	U2AF1	Q157P	MDS	MDS-EB1
4	38319256	E-H-121812-T1-1-D1-1	U2AF1	Q157R	MDS	MDS-RS-MLD
4	38319256	E-H-121820-T1-1-D1-1	U2AF1	S34Y	MDS	MDS-MLD
4	38319256	E-H-121822-T1-1-D1-1	U2AF1	S34F	MDS	MDS-EB1
4	38319256	E-H-121830-T1-1-D1-1	U2AF1	S34Y	MDS	MDS-MLD
4	38319256	E-H-122294-T1-1-D1-1	U2AF1	Q157P	CMML
4	38319256	E-H-122379-T1-1-D1-1	U2AF1	Y158_E159insQY	MDS	MDS-EB1
4	38319256	E-H-122384-T1-1-D1-1	U2AF1	Q157P	MDS	MDS-RS-MLD
4	38319256	E-H-131478-T1-1-D1-1	U2AF1	S34F	MDS	MDS-MLD
4	38319256	E-H-131505-T1-1-D1-1	U2AF1	S34F	MDS	MDS-EB1
4	38319256	E-H-131528-T1-1-D1-1	U2AF1	Q157P	CMML
4	38319256	E-H-131896-T1-1-D1-1	U2AF1	Q157P	MDS	MDS-SLD/MLD
4	38319256	E-H-131898-T1-1-D1-1	U2AF1	R156H	MDS	MDS-U
4	38319256	E-H-131899-T1-1-D1-1	U2AF1	Q157P	MDS	MDS-EB1
4	38319256	I-H-132717-T1-1-D1-1	U2AF1	S34F	MDS	MDS-EB2
5	25550361	004-14	U2AF1	S34F	sAML
5	25550361	033-02	U2AF1	S34F	sAML
5	25550361	380-03	U2AF1	R35L	sAML
5	25550361	445-01	U2AF1	Q157P	sAML
5	25550361	481-01	U2AF1	S34F	sAML
5	25550361	481-02	U2AF1	Q157R	sAML
5	25550361	546-04	U2AF1	S34F	sAML
5	25550361	548-06	U2AF1	S34F	sAML
5	25550361	563-02	U2AF1	S34F	sAML
5	25550361	641-03	U2AF1	S34Y	sAML
5	25550361	648-02	U2AF1	S34F	sAML
5	25550361	700-01	U2AF1	Q157P	sAML
5	25550361	753-05	U2AF1	Q157P	sAML
5	25550361	754-03	U2AF1	R156H	sAML
5	25550361	802-01	U2AF1	Q157P	sAML
6	27959731	1002	U2AF1	S34F	AML	AML with maturation (M2)
6	27959731	1025	U2AF1	S34Y	MDS	refractory anemia with excess blasts-2
6	27959731	1044	U2AF1	Q157P	AML	Acute myelomonocytic leukemia (AMML - M4)
6	27959731	1059	U2AF1	Q157P	AML	AML with maturation (M2)
6	27959731	790809	U2AF1	S34F	AML	Acute megakaryoblastic leukemia (M7)
7	29296803	M-1315	U2AF1	Q157R	MPN	PMF
7	29296803	M-1400	U2AF1	Q157R	MPN	PMF
7	29296803	M-1475	U2AF1	Q157P	MPN	PMF
7	29296803	M-1551	U2AF1	Q157R	MPN	PMF
7	29296803	M-1555	U2AF1	Q157R	MPN	PMF
7	29296803	M-1636	U2AF1	S34Y	MPN	PMF
7	29296803	M-1671	U2AF1	Q157P	MPN	PMF
7	29296803	M-1692	U2AF1	S34F	MPN	PMF
7	29296803	M-173	U2AF1	Q157R	MPN	PMF
7	29296803	M-1738	U2AF1	S34F	MPN	PMF
7	29296803	M-1815	U2AF1	S34F	MPN	PMF
7	29296803	M-1863	U2AF1	S34F	MPN	PMF
7	29296803	M-2070	U2AF1	Q157R	MPN	PMF
7	29296803	M-2078	U2AF1	S34Y	MPN	PMF
7	29296803	M-2123	U2AF1	Q157P	MPN	PMF
7	29296803	M-2157	U2AF1	Q157P	MPN	PMF
7	29296803	M-2163	U2AF1	Q157R	MPN	PMF
7	29296803	M-2243	U2AF1	Q157P	MPN	PMF
7	29296803	M-2645	U2AF1	Q157R	MPN	PMF
7	29296803	M-462	U2AF1	S34Y	MPN	PMF
7	29296803	M-530	U2AF1	S34F	MPN	PMF
7	29296803	M-638	U2AF1	S34F	MPN	PMF
7	29296803	M-647	U2AF1	Q157R	MPN	PMF
7	29296803	M-775	U2AF1	S34Y	MPN	PMF
7	29296803	M-792	U2AF1	Q157R	MPN	PMF
7	29296803	M-065	U2AF1	Q157R	MPN	PMF
7	29296803	M-1400	U2AF1	S34Y	MPN	PMF
7	29296803	M-1508	U2AF1	S34F	MPN	PMF
7	29296803	M-1630	U2AF1	R133L	MPN	PMF
7	29296803	M-173	U2AF1	E184V	MPN	PMF
7	29296803	M-796	U2AF1	Q157P	MPN	PMF
7	29296803	M-978	U2AF1	C163*	MPN	PMF
8	27276561	PD10804a	U2AF1	S34F	AML
8	27276561	PD10842a	U2AF1	S34F	sAML
8	27276561	PD10846a	U2AF1	R35L	AML
8	27276561	PD10956a	U2AF1	S34F	AML
8	27276561	PD10996a	U2AF1	S34F	AML
8	27276561	PD11026a	U2AF1	S34F	AML
8	27276561	PD11088a	U2AF1	S34F	AML
8	27276561	PD11146a	U2AF1	S34F	sAML
8	27276561	PD11275a	U2AF1	S34Y	AML
8	27276561	PD11283a	U2AF1	S34F	AML
8	27276561	PD7711a	U2AF1	S34F	AML
8	27276561	PD7722a	U2AF1	S34Y	sAML
8	27276561	PD7831a	U2AF1	R156H	AML
8	27276561	PD7885a	U2AF1	S34F	AML
8	27276561	PD7942a	U2AF1	R156H	AML
8	27276561	PD7950a	U2AF1	S34F	AML
8	27276561	PD7986a	U2AF1	Q157P	sAML
8	27276561	PD7992a	U2AF1	Q157R	AML
8	27276561	PD8061a	U2AF1	R35L	AML
8	27276561	PD8084a	U2AF1	Q157R	AML
8	27276561	PD8084a	U2AF1	S34F	AML
8	27276561	PD8129a	U2AF1	S34F	AML
8	27276561	PD8228a	U2AF1	R156H	sAML
8	27276561	PD8258a	U2AF1	Q157R	sAML
8	27276561	PD8273a	U2AF1	S34F	AML
8	27276561	PD8290a	U2AF1	S34F	AML
8	27276561	PD8325a	U2AF1	Q157P	sAML
8	27276561	PD8358a	U2AF1	R156H	AML
8	27276561	PD8415a	U2AF1	Q157P	sAML
8	27276561	PD8508a	U2AF1	S34F	AML
8	27276561	PD8567a	U2AF1	S34F	AML
8	27276561	PD8586a	U2AF1	R156H	AML
8	27276561	PD9205a	U2AF1	R28H	AML
8	27276561	PD9206a	U2AF1	S34F	AML
8	27276561	PD9247a	U2AF1	S34F	AML
8	27276561	PD9298a	U2AF1	R188H	AML
9	28090092	MDS-09	U2AF1	S34Y	MDS
9	28090092	MDS-19	U2AF1	S34F	MDS
9	28090092	MDS-36	U2AF1	S34F	MDS
9	28090092	MDS-88	U2AF1	Q157P	MDS
9	28090092	SAML_01	U2AF1	S34Y	sAML
9	28090092	SAML_09	U2AF1	S34F	sAML
9	28090092	SAML_13	U2AF1	S34F	sAML
9	28090092	SAML_17	U2AF1	S34Y	sAML
9	28090092	SAML_24	U2AF1	S34Y	sAML
9	28090092	SAML-91	U2AF1	Q157P	sAML
10	26908133	UPN1	U2AF1	Q157R	CMML
10	26908133	UPN16	U2AF1	R156H	CMML
10	26908133	UPN18	U2AF1	R156H	CMML
10	26908133	UPN36	U2AF1	Q157R	CMML
10	26908133	UPN42	U2AF1	S34F	CMML
10	26908133	UPN52	U2AF1	Q157R	CMML
11	35709710	806884	U2AF1	S34F	sAML
11	35709710	847549	U2AF1	Q157P	sAML
11	35709710	266395_sAML	U2AF1	S34F	sAML
11	35709710	300813_sAML	U2AF1	S34F	sAML
11	35709710	462099_MDS	U2AF1	S34F	MDS
11	35709710	462099_sAML	U2AF1	S34F	sAML
11	35709710	782328_MDS	U2AF1	S34F	MDS
11	35709710	782328_sAML	U2AF1	S34F	sAML
11	35709710	875018_MDS	U2AF1	S34Y	MDS
11	35709710	875018_sAML	U2AF1	S34Y	sAML
11	35709710	990168_MDS	U2AF1	S34F	MDS
11	35709710	990168_sAML	U2AF1	S34F	sAML
12	35522837	8_MDS	U2AF1	Q157R	MDS	MDS-EB2
12	35522837	8_sAML	U2AF1	Q157R	sAML
13	30207916	185295	U2AF1	S34F	MDS
13	30207916	243777	U2AF1	Q157P	MDS
13	30207916	311426	U2AF1	S34F	MDS
13	30207916	377158	U2AF1	Q157P	MDS
13	30207916	395344	U2AF1	S34F	MDS
13	30207916	439820	U2AF1	Q157P	MDS
13	30207916	855934_sAML	U2AF1	Q157P	sAML
14	30333627	1196	U2AF1	Q157P	sAML	AML with myelodysplasia-related changes
14	30333627	1315	U2AF1	S34F	AML	AML with minimal differentiation
14	30333627	1349	U2AF1	Q157R	sAML	AML with myelodysplasia-related changes
14	30333627	1398	U2AF1	Q157R	sAML	AML with myelodysplasia-related changes
14	30333627	1408	U2AF1	S34F	sAML	AML with myelodysplasia-related changes
14	30333627	1446	U2AF1	S34F	AML	Acute erythroid leukaemia
14	30333627	1488	U2AF1	S34F	AML	Acute myelomonocytic leukaemia
14	30333627	1552	U2AF1	S34F	sAML	AML with myelodysplasia-related changes
14	30333627	1585	U2AF1	C154S	AML	AML with inv(3)(q21q26.2) or t(3;3)(q21;q26.2); RPN1-EVI1
14	30333627	1602	U2AF1	S34F	AML	Acute monoblastic and monocytic leukaemia
14	30333627	1657	U2AF1	S34F	sAML	AML with myelodysplasia-related changes
14	30333627	1739	U2AF1	S34F	AML	AML with minimal differentiation
14	30333627	1783	U2AF1	S34F	sAML	AML with myelodysplasia-related changes
14	30333627	2129	U2AF1	Q157R	AML	Acute myeloid leukaemia, NOS
14	30333627	2135	U2AF1	S34F	sAML	AML with myelodysplasia-related changes
14	30333627	2213	U2AF1	Q157P	AML	AML with maturation
14	30333627	2276	U2AF1	Q157P	sAML	AML with myelodysplasia-related changes
14	30333627	2452	U2AF1	S34F	AML	Acute myeloid leukaemia, NOS
14	30333627	2760	U2AF1	Q157P	AML	Acute myeloid leukaemia, NOS
14	30333627	4273	U2AF1	Q157R	AML	Acute myeloid leukaemia, NOS
14	30333627	4273	U2AF1	S34F	AML	Acute myeloid leukaemia, NOS
15	30327374	PT-018	U2AF1	S34F	MPN
15	30327374	PT-020	U2AF1	Q157P	MPN
15	30327374	PT-027	U2AF1	S34F	MPN
15	30327374	PT-034	U2AF1	S34F	MPN
15	30327374	PT-050	U2AF1	Q157R	MPN
15	30327374	PT-057	U2AF1	Q157P	MPN
15	30327374	PT-083	U2AF1	S34Y	MPN
15	30327374	PT-086	U2AF1	Q157R	MPN
15	30327374	PT-089	U2AF1	Q157P	MPN
15	30327374	PT-095	U2AF1	S34Y	MPN
15	30327374	PT-200	U2AF1	S34F	MPN
16	31366621	119	U2AF1	Q157R	CMML
16	31366621	450	U2AF1	R156H	MPN	CNL
16	31366621	457	U2AF1	Q157R	CMML
16	31366621	467	U2AF1	R156H	MPN	CNL
16	31366621	875	U2AF1	Q157R	MPN	MPN-U
16	31366621	972	U2AF1	Q157R	CMML
16	31366621	1010	U2AF1	R156H	CMML
16	31366621	1080	U2AF1	Q157R	CMML
16	31366621	1091	U2AF1	S34F	CMML
16	31366621	1211	U2AF1	Q157P	MPN	CNL
16	31366621	2317	U2AF1	Q84R	MPN	MPN-U
17	30625392	E-H-108030-T1-1-D1-1	U2AF1	Q157P	MPN	MF
17	30625392	E-H-108050-T1-1-D1-1	U2AF1	Q157P	MPN	MF
17	30625392	E-H-108071-T1-1-D1-1	U2AF1	Q157R	MPN	MF
17	30625392	E-H-108072-T1-1-D1-1	U2AF1	Q157P	MPN	MF
17	30625392	E-H-108097-T1-1-D1-1	U2AF1	Q157P	MPN	MF
17	30625392	E-H-108102-T1-1-D1-1	U2AF1	S34F	MPN	MF
17	30625392	E-H-118553-T1-1-D1-1	U2AF1	Q157P	MPN	MF
18	31945802	case 137	U2AF1	Q157P	MPN	ET
18	31945802	case 142	U2AF1	S34Y	MPN	ET
18	31945802	case 82	U2AF1	R190C	MPN	ET
18	31945802	FI157	U2AF1	Q157P	MPN	ET
18	31945802	FI189	U2AF1	Q157R	MPN	ET
18	31945802	FI50	U2AF1	Q157P	MPN	ET
18	31945802	FI59	U2AF1	Q157P	MPN	ET
18	31945802	FI72	U2AF1	Q157R	MPN	ET
18	31945802	FI72	U2AF1	S34F	MPN	ET
18	31945802	FI82	U2AF1	Q157P	MPN	ET
19	24325359	PD10059	U2AF1	S34Y	MPN
19	24325359	PD5004	U2AF1	Q157P	MPN
19	24325359	PD5027	U2AF1	Q157P	MPN
19	24325359	PD9410	U2AF1	Q157P	MPN
20	21909114	CMML-01	U2AF1	Q157R	CMML	CMML1
20	21909114	CMML-02	U2AF1	S34F	CMML	CMML2
20	21909114	MDS-03	U2AF1	Q157R	MDS	RA
20	21909114	MDS-12	U2AF1	A26V	MDS	RCMD
20	21909114	MDS-15	U2AF1	Q157P	MDS	RAEB-1
21	23335386	Patnaik 2013 AJH*	U2AF1	S34F	CMML
21	23335386	Patnaik 2013 AJH*	U2AF1	Q157P	CMML
21	23335386	Patnaik 2013 AJH*	U2AF1	Q157R	CMML
21	23335386	Patnaik 2013 AJH*	U2AF1	Q157G	CMML
21	23335386	Patnaik 2013 AJH*	U2AF1	R158H	CMML
21	23335386	Patnaik 2013 AJH*	U2AF1	S34F	CMML
21	23335386	Patnaik 2013 AJH*	U2AF1	S34F	CMML
21	23335386	Patnaik 2013 AJH*	U2AF1	S34F	CMML
21	23335386	Patnaik 2013 AJH*	U2AF1	S34F	CMML
21	23335386	Patnaik 2013 AJH*	U2AF1	S34F	CMML
21	23335386	Patnaik 2013 AJH*	U2AF1	S34F	CMML
21	23335386	Patnaik 2013 AJH*	U2AF1	S34F	CMML
21	23335386	Patnaik 2013 AJH*	U2AF1	Q157P	CMML
21	23335386	Patnaik 2013 AJH*	U2AF1	Q157R	CMML
21	23335386	Patnaik 2013 AJH*	U2AF1	Q157P	CMML
21	23335386	Patnaik 2013 AJH*	U2AF1	Q157R	CMML
21	23335386	Patnaik 2013 AJH*	U2AF1	Q157P	CMML
21	23335386	Patnaik 2013 AJH*	U2AF1	Q157R	CMML
21	23335386	Patnaik 2013 AJH*	U2AF1	Q157P	CMML
21	23335386	Patnaik 2013 AJH*	U2AF1	Q157R	CMML
* unique patient ID is not provided in publication

## Sheet: Study References
Study ID	Study PMID	Study citation
1	23443460	Walter MJ, et al. Clonal diversity of recurrently mutated genes in myelodysplastic syndromes. Leukemia. 2013 Jun;27(6):1275-82. PMID: 23443460. PMCID: PMC3736571.
2	23634996	Cancer Genome Atlas Research Network; et al. Genomic and epigenomic landscapes of adult de novo acute myeloid leukemia. N Engl J Med. 2013 May 30;368(22):2059-74. PMID: 23634996. PMCID: PMC3767041.
3	24030381	Papaemmanuil E, et al. Clinical and biological implications of driver mutations in myelodysplastic syndromes. Blood. 2013 Nov 21;122(22):3616-27. PMID: 24030381. PMCID: PMC3837510.
4	38319256	Bernard E, et al. Molecular International Prognostic Scoring System for Myelodysplastic Syndromes. NEJM Evid. 2022 Jul;1(7):EVIDoa2200008. PMID: 38319256.
5	25550361	Lindsley RC, et al. Acute myeloid leukemia ontogeny is defined by distinct somatic mutations. Blood. 2015 Feb 26;125(9):1367-76. PMID: 25550361. PMCID: PMC4342352.
6	27959731	Welch JS, et al. TP53 and decitabine in acute myeloid leukemia and myelodysplastic syndromes. N Engl J Med. 2016 Nov 24;375(21):2023-2036. PMID: 27959731. PMCID: PMC5217532.
7	29296803	Tefferi A, et al. Targeted deep sequencing in primary myelofibrosis. Blood Adv. 2016 Nov 30;1(2):105-111. PMID: 29296803. PMCID: PMC5737166.
8	27276561	Papaemmanuil E, et al. Genomic classification and prognosis in acute myeloid leukemia. N Engl J Med. 2016 Jun 9;374(23):2209-2221. PMID: 27276561. PMCID: PMC4979995.
9	28090092	Kim T, et al. The clonal origins of leukemic progression of myelodysplasia. Leukemia. 2017 Sep;31(9):1928-1935. PMID: 28090092.
10	26908133	Merlevede J, et al. Mutation allele burden remains unchanged in chronic myelomonocytic leukaemia responding to hypomethylating agents. Nat Commun. 2016 Feb 24;7:10767. PMID: 26908133. PMCID: PMC4770084.
11	35709710	Menssen AJ, et al. Convergent clonal evolution of signaling gene mutations is a hallmark of myelodysplastic syndrome progression. Blood Cancer Discov. 2022 Jul 6;3(4):330-345. PMID: 35709710; PMCID: PMC9338759.
12	35522837	Guess T, et al. Distinct patterns of clonal evolution drive myelodysplastic syndrome progression to secondary acute myeloid leukemia. Blood Cancer Discov. 2022 Jul 6;3(4):316-329. PMID: 35522837. PMCID: PMC9610896.
13	30207916	Duncavage EJ, et al. Mutation clearance after transplantation for myelodysplastic syndrome. N Engl J Med. 2018 Sep 13;379(11):1028-1041. PMID: 30207916. PMCID: PMC6309244.
14	30333627	Tyner JW, et al. Functional genomic landscape of acute myeloid leukaemia. Nature. 2018 Oct;562(7728):526-531. PMID: 30333627. PMCID: PMC6280667.
15	30327374	McNamara CJ, et al. The mutational landscape of accelerated- and blast-phase myeloproliferative neoplasms impacts patient outcomes. Blood Adv. 2018 Oct 23;2(20):2658-2671. PMID: 30327374. PMCID: PMC6199664.
16	31366621	Zhang H, et al. Genomic landscape of neutrophilic leukemias of ambiguous diagnosis. Blood. 2019 Sep 12;134(11):867-879. PMID: 31366621. PMCID: PMC6742922.
17	30625392	Tamari R, et al. Impact of high-molecular-risk mutations on transplantation outcomes in patients with myelofibrosis. Biol Blood Marrow Transplant. 2019 Jun;25(6):1142-1151. PMID: 30625392. PMCID: PMC6918823.
18	31945802	Tefferi A, et al. Mutation-enhanced international prognostic systems for essential thrombocythaemia and polycythaemia vera. Br J Haematol. 2020 Apr;189(2):291-302. PMID: 31945802.
19	24325359	Nangalia J, et al. Somatic CALR mutations in myeloproliferative neoplasms with nonmutated JAK2. N Engl J Med. 2013 Dec 19;369(25):2391-2405. PMID: 24325359. PMCID: PMC3966280.
20	21909114	Yoshida K, et al. Frequent pathway mutations of splicing machinery in myelodysplasia. Nature. 2011 Sep 11;478(7367):64-9. PMID: 21909114.
21	23335386	Patnaik MM, et al. Spliceosome mutations involving SRSF2, SF3B1, and U2AF35 in chronic myelomonocytic leukemia: prevalence, clinical correlates, and prognostic relevance. Am J Hematol. 2013 Mar;88(3):201-6. PMID: 23335386.
